# Supplementary material for: Complementary biosensors reveal different G-protein signaling modes triggered by GPCRs and non-receptor activators
Source: eLife. 2021 Mar 31;10:e65620. doi: 10.7554/eLife.65620 (PMC8034979; doi:10.7554/eLife.65620)
Supplement: Figure 1—figure supplement 1—source data 1. [file elife-65620-fig1-figsupp1-data1.xlsx]

## Sheet: Gai-GTP
		Exp1	Exp2	Exp3	Exp4	Exp5	Exp6	Exp7	Exp8
Control		0.05302	0.05544	0.05533	0.06022	0.05371	0.05793	0.05541	0.05934
GIV GBA		0.05288	0.05534	0.06097	0.06038	0.05142	0.05613	0.05405	0.06069
AGS1*		0.05508	0.06368	0.06036	0.06342	0.05277	0.05742	0.05603	0.0608
R12 GL		0.05378	0.06114	0.05783	0.0611	0.05268	0.05623	0.0535	0.0595
		Exp1	Exp2	Exp3	Exp4	Exp5	Exp6	Exp7
Control		0.0804951	0.0725327	0.0788611	0.0779395	0.0851648	0.0708258	0.0698494
Ric8A*		0.0828321	0.0862968	0.0991223	0.107495	0.111571	0.0857108	0.0934076

## Sheet: Gbg
		Exp1	Exp2	Exp3	Exp4	Exp5	Exp6	Exp7	Exp8
Control		0.0762	0.08321	0.08068	0.0788	0.08909	0.09563	0.08722	0.08424
GIV GBA		0.08012	0.08791	0.08664	0.08387	0.09482	0.09858	0.09081	0.09411
AGS1*		0.08031	0.08551	0.07773	0.07992	0.0936	0.09666	0.08478	0.09
R12 GL		0.08308	0.09365	0.08594	0.08686	0.09669	0.10392	0.09054	0.0986
		Exp1	Exp2	Exp3	Exp4	Exp5	Exp6
Control		0.0872792	0.0929159	0.0976105	0.0998659	0.107279	0.0985891
Ric8A*		0.0830311	0.0962194	0.0975521	0.101625	0.102009	0.0995716
