# Supplementary material for: Complementary biosensors reveal different G-protein signaling modes triggered by GPCRs and non-receptor activators
Source: eLife. 2021 Mar 31;10:e65620. doi: 10.7554/eLife.65620 (PMC8034979; doi:10.7554/eLife.65620)
Supplement: Figure 2—figure supplement 1—source data 1. [file elife-65620-fig2-figsupp1-data1.xlsx]

## Sheet: M4R
	minus PTX				plus PTX
Time	Exp1	Exp2	Exp3	Exp4	Exp1	Exp2	Exp3	Exp4
0	0.000193699	0.000272	9.1e-05	0.000117	-8.20067e-05	0.000269495	0.000353478	7.94407e-05
0.24	0.000464991	0.000252	-0.00021	6.83e-05	0.000524231	-4.85219e-05	9.54633e-05	-0.000152592
0.48	-9.52643e-05	1.47e-05	0.000333	0.000321	0.000356488	0.000347771	0.000225908	0.000471879
0.72	-0.000273364	0.000355	0.000295	-0.00036	0.00027982	3.5158e-05	-3.88278e-05	-5.44534e-05
0.96	0.000107819	0.000256	0.00024	0.000492	-1.17845e-05	0.000121799	-6.7873e-05	6.33266e-05
1.2	-1.74763e-05	-7.7e-05	0.000259	0.000346	0.000367919	0.000331895	0.000103752	0.000128757
1.44	7.7561e-05	7.28e-05	0.000106	0.000228	0.000196459	0.000281666	6.90164e-05	-0.000239114
1.68	0.000210328	0.00028	5.58e-05	4.55e-05	0.000115154	0.000331339	6.0959e-05	5.22155e-05
1.92	0.000279748	0.000308	-5.1e-05	0.000591	0.000313583	0.000292077	-0.00049867	0.000117655
2.16	0.000246947	0.000302	-8e-05	0.000396	9.16771e-05	0.000371356	0.000159242	0.000267622
2.4	0.000119664	0.000168	0.000206	0.000334	0.000205068	5.90664e-06	0.000346566	0.000278008
2.64	0.000445464	0.000184	0.000232	0.000176	0.000233966	0.00034751	-0.000159793	0.000170036
2.88	-3.91864e-05	-0.0003	0.00028	4.12e-06	1.99869e-05	-2.29797e-05	0.00010947	-8.16498e-05
3.12	1.26108e-05	0.000105	-1.8e-05	0.000126	-8.8167e-05	0.000271531	2.57638e-05	-4.3106e-05
3.36	0.000604242	0.000155	0.000372	3.9e-05	0.000322889	0.000127269	0.000214428	0.000183329
3.6	2.17775e-05	0.000204	0.000167	-0.00026	0.000267339	0.000210314	9.62391e-05	0.000132503
3.84	0.000276996	0.00033	7.97e-05	-0.00012	4.29121e-05	0.000585553	0.000495239	-5.53711e-05
4.08	0.000242298	8.71e-05	0.000393	5.06e-05	0.000128813	-8.55206e-06	-5.16723e-05	-0.000182542
4.32	5.95641e-05	0.000187	0.000118	0.000192	-0.000190388	-4.77428e-05	-6.9375e-05	2.01562e-05
4.56	0.000285953	2.23e-05	0.000137	3.8e-05	6.78777e-05	0.000241601	0.000163542	5.38366e-05
4.8	-0.000234058	7.51e-05	0.00012	0.000228	0.000174221	2.33655e-05	0.000282114	0.000256064
5.04	-1.50462e-05	0.00037	9.18e-05	0.000279	3.67195e-05	0.000378867	-0.000131851	-1.26051e-05
5.28	-0.000150975	7.18e-05	0.00047	-0.00014	-6.86162e-05	5.32602e-05	0.000116536	0.000253426
5.52	0.000338434	0.000144	-1.9e-05	0.00025	-4.2575e-05	8.43023e-05	0.000153017	2.85617e-05
5.76	0.000183345	0.000217	-8.2e-05	-0.00022	0.000231841	-0.000163172	-0.000140064	0.000353696
6	0.00023915	0.000143	0.000141	0.000476	-0.000103593	0.000288124	0.000119106	6.95284e-05
6.24	-4.31619e-05	-5.4e-05	0.000244	0.000244	5.83016e-05	6.21411e-05	-0.000120211	0.00030051
6.48	-0.000218473	0.000138	0.00017	0.000239	0.000111589	0.00033412	-9.5291e-05	0.000223586
6.72	0.000296793	0.000437	7.19e-05	0.000343	2.7512e-05	-6.69508e-05	0.000201066	0.000218054
6.96	0.000128851	-5.9e-05	0.000107	0.000232	0.000127129	2.63724e-05	0.000259799	-1.25853e-05
7.2	0.000372577	0.000549	-0.00014	-0.0002	0.000736244	-9.08864e-05	0.000212408	0.000355858
7.44	6.40945e-05	4.26e-05	0.000143	0.000446	0.000145582	2.38208e-06	0.000271201	0.000326157
7.68	-1.86189e-05	0.000193	8.85e-05	0.000206	0.00040723	0.000298008	0.000342528	-0.000168963
7.92	0.000240724	-1.8e-05	-4.7e-05	0.00043	-0.000222911	0.000115881	0.000100935	-0.000173358
8.16	3.47389e-05	-0.00051	3.71e-05	-0.00042	6.04786e-05	1.49893e-05	0.000142927	0.000159046
8.4	-0.000233597	5.43e-05	8.65e-05	7.19e-05	1.28945e-05	0.000208865	-9.22056e-05	0.000319568
8.64	3.65388e-05	6.33e-05	-0.00018	0.00038	-2.99935e-05	5.76808e-05	0.000203952	-0.000132805
8.88	8.36254e-05	0.000193	2.4e-05	0.000332	0.000168514	4.05269e-05	-0.000112502	-6.20298e-05
9.12	-4.67104e-05	-7.2e-05	-0.00019	0.000146	0.000236807	-4.75543e-05	0.000165892	0.000139502
9.36	0.000291376	0.0002	4.87e-05	0.000151	-0.0001602	-4.56857e-05	-0.000217108	0.00024927
9.6	-0.000216815	4.71e-05	-0.00015	-0.00015	0.000388581	0.000399039	1.89905e-05	3.89008e-06
9.84	0.000118282	-0.00029	0.00023	0.000159	0.000166679	0.000324655	9.74765e-05	8.4918e-05
10.08	-0.000127514	0.000459	0.000133	-0.00018	-0.000130613	0.00034326	0.000190037	0.0001426
10.32	0.000167634	1.8e-05	0.000106	8.27e-06	-8.20898e-05	-0.000292509	5.40589e-06	-3.00198e-05
10.56	0.000136201	0.000123	0.000117	1.18e-05	-8.67183e-05	-0.000106127	0.000256825	2.67201e-05
10.8	-5.24903e-05	0.000284	-0.00021	-0.00049	0.000212699	0.000203885	0.000128991	0.000199316
11.04	0.000239452	0.00041	9.41e-05	0.000164	-0.000159328	5.82322e-05	-0.000161535	0.000174107
11.28	-4.01567e-05	0.00039	4.87e-05	0.000268	0.000154077	-9.56408e-05	0.000380676	-0.000101821
11.52	0.000153613	0.000245	0.000126	-9.1e-05	2.42926e-05	0.000292901	5.58759e-05	-0.000303452
11.76	-0.000167316	-9.2e-05	1.55e-05	0.000137	0.000299958	0.000113628	-0.00043496	-8.10045e-05
12	2.06163e-05	-0.0001	-0.00026	-0.00013	5.13078e-05	6.88732e-05	0.000228292	-5.33369e-05
12.24	-0.000247459	-4.2e-05	-0.00027	7.85e-05	-0.000339958	-9.95307e-05	-0.000222334	-0.000210798
12.48	0.000142367	-0.00014	-0.00013	6.48e-05	0.000122612	0.000112887	-0.000263891	-4.74927e-05
12.72	0.000140095	-0.00015	-0.0001	-0.00033	0.000139346	0.000156246	-0.000113348	-5.5556e-05
12.96	-0.000184877	0.000221	0.000189	-9.6e-05	-2.25413e-05	0.000171681	0.000264596	-0.00018244
13.2	-0.000407318	3.77e-05	4.12e-05	0.000219	0.000206799	-0.000102192	-0.000300895	-0.000106002
13.44	0.000249924	-0.00013	-0.00013	-1.3e-05	-0.000318928	0.000195537	3.77682e-05	-1.07052e-05
13.68	2.50697e-06	-7.9e-05	-6.1e-05	0.000338	0.000478367	-2.65641e-06	6.85745e-05	0.000142779
13.92	0.000102971	-6.8e-05	6.72e-05	-5.9e-05	-1.34665e-05	0.000141766	2.26853e-05	-0.000160522
14.16	0.000172246	0.000101	0.000273	-8.9e-05	0.000151892	6.49054e-05	0.000170062	-0.000212815
14.4	0.000122269	0.000153	0.000102	-0.0001	4.75886e-05	-8.79227e-05	5.91219e-05	4.82905e-05
14.64	3.78474e-05	-0.00014	-1.1e-05	-0.00037	-0.000168357	3.56427e-05	-6.39474e-06	-0.000172223
14.88	-0.000256535	-0.00012	0.000177	-0.00022	0.000296078	-5.57082e-05	-1.46978e-05	-8.44798e-05
15.12	-0.000206483	0.000137	-2.7e-05	-0.00034	-0.000143543	-0.000243206	-0.000183164	-0.000293583
15.36	-0.00044249	-0.00019	-0.00016	-0.00035	-0.000383148	0.000435145	-4.64826e-05	-6.48759e-05
15.6	2.10723e-05	0.000133	0.000236	-0.00035	-0.000232415	-0.000206127	0.000161856	-6.38179e-05
15.84	0.00019539	-8.4e-05	-0.00012	0.000117	0.000409407	1.495e-05	5.18373e-05	-0.00021193
16.08	0.000316443	-4.4e-05	-1.1e-05	-8.6e-05	0.000453366	-0.00032355	0.00020331	-0.000169738
16.32	-0.00018165	0.000131	-0.00016	7.72e-05	0.000200522	8.00062e-05	-4.42351e-05	-1.1089e-05
16.56	0.000175511	-2.3e-05	0.000303	-0.00047	-0.000193713	0.000245613	-0.000171078	-8.11991e-05
16.8	-8.90539e-05	4.76e-05	0.000147	-0.0002	0.000306577	-0.000340165	-0.000206878	0.00028791
17.04	-5.55979e-05	-0.00011	0.000109	0.000162	5.05914e-05	0.000103254	-4.87288e-05	9.58831e-06
17.28	0.000106687	-5.3e-05	0.000186	9.42e-05	0.000300709	5.09126e-05	0.00027614	0.000152538
17.52	-0.000185487	-0.00021	0.000111	-0.00029	-0.000233706	2.76472e-06	-0.000206052	0.000161451
17.76	0.000154072	-0.00019	0.00026	0.000196	0.000228268	-1.20375e-06	8.91022e-05	-9.92652e-05
18	-0.000352825	-0.00026	-0.00033	0.000247	-0.000265943	-0.00014945	3.79784e-05	0.000192647
18.24	-0.000246926	-0.00022	0.000149	2.01e-05	-2.48418e-05	4.16209e-05	-0.000205145	-8.79289e-06
18.48	-0.00010924	-0.00047	-0.00031	0.000138	1.02672e-05	-0.000188646	-0.000150165	0.000162499
18.72	0.000142936	-0.00023	-6.6e-05	-0.00022	0.000164208	4.60425e-05	1.96908e-05	-0.000226111
18.96	0.000342831	-2.9e-05	-0.00012	2.52e-05	-8.97314e-05	-0.000148675	-1.19934e-05	5.64125e-05
19.2	0.000327872	-1.9e-05	-0.00013	-0.00015	0.000161585	-0.000196738	-0.000188063	-7.25669e-05
19.44	-0.000159338	-3.2e-05	1.09e-05	0.000432	-0.000385832	-0.000189591	-4.61582e-05	-0.000138881
19.68	9.22767e-05	2.06e-05	-6.4e-05	-2.4e-05	-1.47274e-05	-0.00026177	6.2799e-05	-0.000249497
19.92	-0.000425414	-0.00012	9.78e-05	-7.3e-06	-2.81923e-05	-0.000117422	-3.4384e-05	0.000105652
20.16	-0.000162697	-0.00019	-8.6e-05	0.000374	0.000457054	-0.000208097	0.000166887	0.000409682
20.4	0.000179335	0.000112	0.000123	0.000127	-0.000521358	-6.53711e-05	-0.000234913	5.53907e-05
20.64	-8.10172e-05	0.000356	-6.9e-05	-0.0001	-6.1028e-05	-0.000316534	7.21522e-05	-0.000222501
20.88	-1.85471e-05	-0.00012	-0.00012	0.000483	-0.00046233	0.000132697	-3.4415e-05	1.19549e-05
21.12	-0.000304659	0.000153	-0.00015	-0.00028	-0.000167792	-0.000141889	-0.000300348	-1.34426e-05
21.36	-0.000406805	-1.5e-05	0.000197	0.00011	1.20312e-05	5.72227e-05	-0.000529925	0.000503355
21.6	-0.000120557	-0.00029	-0.00018	8.76e-06	-0.000372795	-3.24014e-06	0.00016906	-1.07607e-05
21.84	0.000179809	-1.7e-05	3.93e-05	-0.00027	-0.000139911	-0.000231457	7.08389e-05	2.94303e-06
22.08	-1.52166e-06	0.000168	0.000112	-0.0002	0.000122208	-0.000102197	-0.000139951	-0.000190297
22.32	-0.000191262	5.01e-05	-0.00027	-0.00039	-0.000321896	-1.98384e-05	-1.78926e-06	3.49231e-05
22.56	-0.000379638	-0.00015	-0.00023	-0.00034	-3.61802e-05	7.43196e-06	-2.00042e-05	0.000156648
22.8	-8.18859e-05	-0.00012	-0.00034	0.00017	-6.96566e-05	-0.000198855	0.000129796	-2.02462e-05
23.04	0.000159637	-0.00065	-0.00028	-0.00024	5.06835e-05	-0.000207546	-0.00022164	-0.000397781
23.28	-0.000157842	-7.7e-05	-0.00023	-0.00019	7.84573e-05	-0.000342266	-0.000227992	1.35789e-05
23.52	-0.000341514	0.000306	-0.00011	-0.00017	-3.43601e-05	-0.000177371	-0.000274456	0.000342201
23.76	-8.16527e-05	-0.00026	-0.00011	-0.00012	-7.81715e-05	6.67207e-06	-0.000208013	-0.000222954
24	1.89704e-05	5.88e-05	-0.00012	-0.00014	-0.000119875	-0.000207775	-0.000161732	7.1768e-05
24.24	-9.68871e-05	-0.00017	-0.00022	-0.00045	-0.00043305	-0.000193042	-4.63613e-05	1.22894e-05
24.48	-0.000314233	-0.00019	-0.00031	-0.00054	0.000124023	2.83959e-05	-3.71775e-06	-0.000328072
24.72	-1.39455e-05	0.000183	0.000618	-0.00017	-0.000191517	-0.000158707	-6.37087e-05	-9.28625e-06
24.96	0.000262888	-0.00023	-0.0002	-0.00022	-4.05526e-05	-0.000221496	-0.000128989	0.000292261
25.2	-0.000261706	-0.00019	3.48e-05	0.000123	-0.000481752	0.000161187	-8.57133e-05	-8.73954e-05
25.44	6.84569e-05	-0.00019	-0.00018	0.000355	-3.00544e-05	-0.000229439	-0.000468306	-0.000281771
25.68	-0.000183035	0.000244	-5e-05	0.000288	-6.01938e-05	-9.48814e-05	2.24451e-05	-0.000181149
25.92	-0.000118047	6.46e-06	9.67e-05	0.000238	-0.000342461	-0.000339036	-0.000392857	7.02474e-05
26.16	0.000168974	-0.00025	-0.00024	-2.4e-05	-0.000127335	1.9017e-05	-8.25358e-05	8.13806e-05
26.4	-0.000261119	-0.00021	-4.5e-05	-0.0001	-0.000299844	-0.000384935	-9.55064e-05	-0.000331661
26.64	4.05415e-05	0.000208	-4.6e-05	-8.4e-06	-5.77224e-05	-0.000168159	0.000119009	0.000231633
26.88	7.58218e-06	7.41e-05	-0.00038	-0.00052	-0.000384005	-9.34217e-05	-1.11512e-05	-3.0996e-05
27.12	-0.000248976	-0.00024	-0.00024	2.16e-05	-0.000270462	-0.000251131	6.97033e-05	-6.67185e-05
27.36	0.000195417	-0.00024	7.84e-05	-0.00027	-4.07791e-05	-0.000235235	7.26643e-05	1.73341e-05
27.6	7.69059e-05	-0.00024	-0.00013	0.000167	-0.000354116	-0.000399846	-5.83805e-06	-5.98599e-05
27.84	-0.000306645	-0.00024	1.37e-05	0.0001	1.89258e-05	-0.00047053	-1.87785e-06	-0.000300618
28.08	-0.000248224	-0.00014	-0.00019	-0.00036	0.000103034	-2.39844e-05	0.000128219	-0.000419347
28.32	0.000379349	-3.5e-05	-0.00027	-0.00073	-0.000106053	-9.59281e-05	3.5514e-05	-0.000217403
28.56	-0.000248819	-0.00045	-0.00041	-0.00018	-0.000505314	-2.65103e-05	-0.000130047	-0.000388375
28.8	-0.000445522	-0.00023	-0.00017	-0.00048	-0.000266297	0.000205584	-0.000221179	-0.000229754
29.04	0.0002661	-0.00037	-0.00026	0.00038	-8.10852e-05	-2.68489e-05	0.000156417	-0.000118269
29.28	-0.000150187	-0.00035	-6.1e-05	-0.00044	-0.000483446	-0.000220588	0.000118611	-0.000273283
29.52	-0.000535343	-0.00032	-0.00014	-8.6e-05	-0.000406492	-0.00049229	-0.000438472	-0.000139134
29.76	-0.000341789	-0.00041	-0.00018	-0.00037	-0.000395523	-0.000383459	7.75089e-05	-0.000114235
30	-3.46078e-05	-0.00056	-0.0003	-0.0003	-0.000581389	-0.000411094	-5.16645e-06	-0.000269367
30.24	0.000959982	0.000159	0.0007	0.000142	-0.000261543	-0.000442875	-0.000327415	-0.000316527
30.48	0.00173423	0.000967	0.00224	0.000821	-1.07929e-05	-0.000745942	-1.93104e-06	-0.000772931
30.72	0.00294239	0.001603	0.003815	0.001972	0.000253482	-0.000621277	3.7398e-06	-0.000552999
30.96	0.00387296	0.002026	0.004794	0.002455	-0.000158429	-0.000635481	-0.000109212	-0.000280311
31.2	0.00451897	0.002767	0.005258	0.002632	6.93537e-05	-0.00046121	-0.000277548	-0.000278222
31.44	0.00529944	0.002715	0.006482	0.003309	-4.87766e-05	-0.000478412	-0.00013881	-0.000340681
31.68	0.00555272	0.003788	0.006999	0.003856	4.77688e-05	-0.000720003	-0.000409433	-0.000423776
31.92	0.00643248	0.00376	0.007596	0.004048	0.000539703	-0.000460289	-1.35613e-05	-0.000121794
32.16	0.00651433	0.003945	0.008551	0.004361	0.00013893	-0.000396142	-3.88112e-05	-0.000454624
32.4	0.00737452	0.004353	0.008788	0.004494	-0.000152793	-0.000843158	-0.000332164	-0.000296974
32.64	0.00771533	0.004443	0.00931	0.004651	0.000135457	-0.000885908	-0.000223328	-0.000206824
32.88	0.00766586	0.004841	0.010044	0.004848	-0.000494217	-0.000795101	-0.000270743	-0.000136417
33.12	0.00780764	0.00473	0.010182	0.005409	-0.000388662	-0.000201206	3.05084e-05	-0.000316331
33.36	0.0083778	0.005102	0.010655	0.005296	9.27468e-05	-0.000505156	-0.00011762	-0.000404576
33.6	0.00851921	0.005149	0.010664	0.005668	-0.000524595	-0.000770768	1.43315e-05	-0.000427525
33.84	0.00896528	0.005209	0.011352	0.005629	-4.97083e-05	-0.000170043	-1.42188e-05	5.27491e-05
34.08	0.0090523	0.005745	0.011662	0.005255	0.000259306	-0.000463496	7.52524e-05	-0.000230424
34.32	0.0092329	0.005813	0.011982	0.006017	-0.000333349	-0.000701657	-9.93364e-05	-0.000202798
34.56	0.00895352	0.00616	0.012365	0.006008	-0.000181671	-0.000605498	2.25615e-05	-0.000714522
34.8	0.00960704	0.00627	0.012809	0.006091	1.28084e-05	-0.000339092	-0.000120036	-0.000440334
35.04	0.00993041	0.006271	0.012887	0.006281	-0.000219846	-0.000585337	0.000280739	-0.000466298
35.28	0.00969014	0.006436	0.013302	0.006124	-5.56692e-06	-0.000803797	0.000124048	2.72013e-05
35.52	0.0102509	0.006153	0.013332	0.006467	-0.000118916	-0.00062385	-5.60785e-05	-0.000597122
35.76	0.0103953	0.006857	0.013957	0.006278	-0.000191753	-0.000615028	-0.000223475	-7.46018e-05
36	0.0104287	0.00666	0.013501	0.006626	-0.000285931	-0.000588181	-7.66511e-05	-0.000480301
36.24	0.0106871	0.006809	0.013709	0.006856	-2.2117e-05	-0.000459713	-2.70137e-05	-0.000733208
36.48	0.0108857	0.007032	0.013998	0.006869	1.36087e-05	-0.000331172	-0.000276486	-0.000304998
36.72	0.0107485	0.006917	0.013976	0.00702	-0.000123481	-0.000181013	1.86723e-05	-0.000436565
36.96	0.0107393	0.007003	0.014401	0.006968	0.000125342	-0.000673669	-0.000163057	-0.00047386
37.2	0.0111933	0.007102	0.014412	0.007003	-0.000453401	-0.000422587	9.3618e-05	-0.000724809
37.44	0.0110332	0.007014	0.014788	0.006962	-0.000732373	-0.000581805	-0.000409362	-0.000576183
37.68	0.0113838	0.007251	0.015072	0.007275	-0.000112285	-0.000869084	0.000121277	-0.000307855
37.92	0.0116651	0.00723	0.015014	0.00695	-0.000226536	-0.000797356	-0.000143525	-0.000529305
38.16	0.0112153	0.007226	0.015083	0.007441	-0.000604958	-0.000822586	5.42057e-05	-0.000414302
38.4	0.0115515	0.007289	0.014959	0.006984	-0.000533282	-0.000585683	0.000343125	-0.000691952
38.64	0.0113399	0.007381	0.015583	0.007233	-0.000137052	-0.000794766	-0.000149349	-0.00013272
38.88	0.0117255	0.007592	0.015624	0.006871	-0.000463683	-0.000551896	-0.000259761	-0.000447146
39.12	0.0118689	0.00729	0.015588	0.007067	4.34869e-05	-0.000671623	-0.000263257	-0.000530176
39.36	0.0117529	0.007444	0.015695	0.007401	-0.000251876	-0.000566437	-8.39638e-05	-0.000256169
39.6	0.0118842	0.007532	0.015681	0.007503	-0.000409854	-0.00064387	-6.41607e-05	-0.000520046
39.84	0.0115206	0.007563	0.015715	0.007125	3.7379e-05	-0.00068785	-9.7478e-05	-0.000351219
40.08	0.0120236	0.007639	0.01594	0.007857	-0.000157432	-0.000657973	0.000372249	-0.000646908
40.32	0.011814	0.007496	0.016113	0.007488	-0.000305998	-0.000599262	-0.00016444	-0.000517725
40.56	0.0125523	0.007877	0.015924	0.007513	-0.000228533	-0.000734846	5.94235e-05	-0.000472826
40.8	0.0119058	0.007733	0.016295	0.007068	-0.000638322	-0.000480305	-6.88913e-05	-0.000291011
41.04	0.0124384	0.007854	0.016349	0.006897	5.81002e-05	-0.000750304	-0.000112515	-0.000901132
41.28	0.0122165	0.007689	0.016536	0.007429	-0.000287164	-0.000536228	-2.14025e-05	-0.000640556
41.52	0.0125343	0.007791	0.01623	0.007366	-0.000379502	-0.000782176	-0.000390654	-0.000297038
41.76	0.0122764	0.007814	0.017003	0.007577	-0.000455736	-0.000657902	0.000147912	-0.000767519
42	0.0122613	0.007947	0.016861	0.007666	-0.000462007	-0.000686544	0.000272853	-0.000608061
42.24	0.012522	0.007629	0.01644	0.00765	-0.000146023	-0.000606325	0.000310666	-0.000599505
42.48	0.0127398	0.008168	0.016663	0.00784	-0.000117065	-0.000595649	-2.22053e-05	-0.00062217
42.72	0.0128232	0.007561	0.016876	0.008	-0.000252026	-0.000841468	5.75898e-06	-0.00103607
42.96	0.0126201	0.008111	0.016954	0.00773	-0.000321434	-0.000584131	-0.000337657	-0.000545853
43.2	0.0126351	0.007558	0.017072	0.007224	0.000139141	-0.000475376	6.30053e-05	-0.000429398
43.44	0.0125878	0.007912	0.017271	0.007553	-0.000448592	-0.000421141	-0.000298586	-0.000614474
43.68	0.0128046	0.008144	0.016871	0.007813	-0.000880923	-0.000769858	0.000155375	-0.000497115
43.92	0.0127718	0.008086	0.016922	0.007952	-0.00029787	-0.00083675	0.000218005	-0.000457775
44.16	0.0129921	0.008008	0.017281	0.007663	-9.38025e-05	-0.000486712	-0.000188077	-0.000728031
44.4	0.0129413	0.007563	0.017227	0.007575	-0.000705173	-0.000521653	-5.08629e-05	-0.000878839
44.64	0.0132046	0.007997	0.017044	0.007901	-0.000308407	-0.000991815	-1.84592e-05	-0.000301509
44.88	0.0129616	0.008243	0.017044	0.007647	-0.000207335	-0.000791452	5.69067e-06	-0.000805158
45.12	0.0128051	0.0081	0.016892	0.007948	-0.000402953	-0.000481171	3.89059e-05	-0.000563756
45.36	0.0130751	0.008052	0.017563	0.007802	-0.000396109	-0.000835387	0.000205632	-0.000506295
45.6	0.0131591	0.00781	0.017144	0.008289	-0.000232734	-0.000678424	-0.000165554	-0.000484679
45.84	0.0132082	0.007676	0.017535	0.008115	-0.000553768	-0.000881428	-0.000121196	-0.000513047
46.08	0.0126451	0.00812	0.017285	0.007874	-0.000736026	-0.000358842	-3.14659e-05	-0.000584974
46.32	0.0129555	0.007503	0.017504	0.007234	-0.000373064	-0.000645145	-0.000256469	-0.000513447
46.56	0.0136873	0.008426	0.017181	0.007154	-0.000470351	-0.000803023	1.7088e-05	-0.000463866
46.8	0.0132808	0.008369	0.017361	0.007867	-0.000568297	-0.000740927	8.29454e-06	-0.000784619
47.04	0.0134354	0.008124	0.017542	0.007824	-0.000399846	-0.000312373	-0.000170834	-0.000385802
47.28	0.012941	0.008074	0.017373	0.007357	-0.000578012	-0.000929499	-0.00013804	-0.000600997
47.52	0.0133035	0.008376	0.017418	0.007303	-0.000283449	-0.000411406	-0.000218839	-0.000306675
47.76	0.0130631	0.007807	0.017468	0.007796	-7.41287e-05	-0.000611608	-0.000158886	-0.000447207
48	0.0136335	0.008244	0.017643	0.007604	-0.000468899	-0.000592888	-0.000287109	-0.000547744
48.24	0.0130372	0.008025	0.017877	0.007968	-0.000244732	-0.000668809	-0.000190459	-0.000549914
48.48	0.0134633	0.008372	0.017606	0.008017	-0.000193817	-0.000547908	4.57803e-05	-0.000714742
48.72	0.0134851	0.008586	0.017983	0.0076	-0.0004596	-0.000738763	4.38182e-05	-0.000834699
48.96	0.0131209	0.007846	0.017922	0.007479	-0.000503053	-0.000586093	3.18795e-05	-0.000475289
49.2	0.0134613	0.008378	0.01773	0.007623	-0.000294601	-0.000879116	-6.9902e-05	-0.000739596
49.44	0.0133325	0.008198	0.017455	0.007824	-0.000786177	-0.000699059	-0.000178459	-0.000665415
49.68	0.0136589	0.007904	0.017261	0.007559	-0.000281409	-0.000777674	4.68424e-06	-0.000640851
49.92	0.0129342	0.008213	0.017654	0.007546	-0.000509077	-0.000585326	-9.43868e-05	-0.000779414
50.16	0.013764	0.008008	0.017961	0.007695	-0.000578949	-0.000769972	-0.000188494	-0.000646476
50.4	0.0132701	0.008367	0.017443	0.007912	-0.000715785	-0.000593275	-6.0213e-05	-0.000580827
50.64	0.0133038	0.007894	0.017853	0.007848	-0.000500845	-0.000547486	-0.000157162	-0.000241808
50.88	0.0136896	0.008486	0.017719	0.008091	-0.000553542	-0.000773505	1.93145e-05	-0.00050264
51.12	0.0137692	0.008131	0.017839	0.007603	-0.000291975	-0.00071539	2.84122e-06	-0.000412288
51.36	0.0134346	0.007993	0.018211	0.007603	-0.000296932	-0.000490596	5.76715e-05	-0.000582393
51.6	0.0134433	0.007649	0.017709	0.007523	-0.000369014	-0.000751694	-0.000219439	-0.000758106
51.84	0.0140302	0.007896	0.017498	0.007655	-0.000517706	-0.00113106	3.31123e-05	-0.000937849
52.08	0.0133738	0.008061	0.017982	0.007937	-0.000487448	-0.000765495	-0.000184855	-0.000532638
52.32	0.013355	0.008157	0.017968	0.00739	-0.00014694	-0.000447146	0.000229977	-0.000687657
52.56	0.0138785	0.007862	0.017734	0.007431	-0.000870398	-0.000784171	-4.87233e-05	-0.00049923
52.8	0.0138185	0.008081	0.017808	0.007872	-0.000397983	-0.000809232	-0.000199311	-0.000610544
53.04	0.0134277	0.008126	0.018022	0.007273	-0.000769716	-0.000971517	-0.000232373	-0.000738815
53.28	0.0135464	0.007945	0.017862	0.007792	-0.000478959	-0.000700418	-0.000295256	-0.000724317
53.52	0.013788	0.007993	0.017366	0.007577	-0.000577434	-0.000718037	-0.000219283	-0.000850649
53.76	0.0138206	0.008157	0.017712	0.00768	-0.000589561	-0.00067334	-0.000204277	-0.000599962
54	0.0134946	0.007966	0.01745	0.007549	-0.0004206	-0.000878347	-6.09047e-06	-0.000557044
54.24	0.0136435	0.007875	0.017519	0.007411	-0.000454921	-0.000745142	-0.000353745	-0.000542583
54.48	0.0137717	0.007873	0.017814	0.007396	-0.000420293	-0.000771608	-4.34868e-05	-0.000915019
54.72	0.0136819	0.007534	0.017596	0.007657	-0.000226628	-0.00125555	-0.000284897	-0.00079535
54.96	0.01421	0.008066	0.017696	0.007597	-0.000827202	-0.000677785	-0.000340766	-0.000670796
55.2	0.0137162	0.007888	0.018004	0.007438	-0.000824895	-0.00045659	-0.000290038	-0.000408079
55.44	0.0139285	0.007843	0.018072	0.007234	-0.000621634	-0.000808786	0.000101503	-0.000551115
55.68	0.0137033	0.008124	0.017826	0.007419	-0.000704034	-0.000708024	-0.000232456	-0.000740181
55.92	0.0137891	0.007592	0.017557	0.007573	-0.000881929	-0.000839861	-8.43544e-05	-0.000745302
56.16	0.0135333	0.00758	0.018089	0.007596	-0.000907257	-0.000736725	-3.6734e-05	-0.000550316
56.4	0.0138905	0.007714	0.017857	0.008039	-0.000577661	-0.000619277	-0.000183682	-0.000926454
56.64	0.0135466	0.00795	0.017699	0.00727	-0.000429107	-0.000507033	0.00011295	-0.000725195
56.88	0.0142152	0.00798	0.017981	0.007602	-0.00100014	-0.000470063	-0.000173567	-0.000475451
57.12	0.0139921	0.007859	0.01789	0.007777	-0.000543909	-0.000879471	4.05142e-05	-0.000869715
57.36	0.0137102	0.007934	0.017992	0.007524	-0.000900646	-0.000880853	-0.000169261	-0.000729091
57.6	0.0135561	0.007884	0.017744	0.007705	-0.000673839	-0.000710451	-0.000487385	-0.000518451
57.84	0.0139642	0.007922	0.017621	0.007366	-9.83508e-05	-0.00078664	-0.000206575	-0.000298257
58.08	0.0130636	0.007669	0.017203	0.007122	-0.000349348	-0.000774237	-1.66364e-05	-0.0009516
58.32	0.0140094	0.007535	0.017955	0.007461	-0.000975432	-0.000535703	-0.000225939	-0.000776214
58.56	0.013718	0.007756	0.018036	0.007452	-0.000705549	-0.000836033	-0.000112277	-0.000621187
58.8	0.0135223	0.007793	0.01794	0.007577	-0.000524096	-0.000931143	0.000176926	-0.000708027
59.04	0.0141332	0.007563	0.017795	0.007161	-0.000911174	-0.000635731	-0.000435669	-0.00049568
59.28	0.014006	0.007626	0.017906	0.007273	-0.000386121	-0.000755517	-0.000278225	-0.000850489
59.52	0.0133202	0.007921	0.017962	0.007455	-0.000803099	-0.000689194	0.000149293	-0.000550589
59.76	0.0142279	0.007759	0.017875	0.006991	-0.000732114	-0.000594275	-0.000132622	-0.00060536
60	0.0138856	0.007447	0.017653	0.007374	-0.000645585	-0.000748645	-6.34982e-05	-0.000544459
60.24	0.013617	0.007802	0.017552	0.007124	-0.000643363	-0.000696648	-0.000222673	-0.00076646
60.48	0.014073	0.007466	0.017794	0.0071	-0.000397713	-0.000601023	-8.36131e-05	-0.000751904
60.72	0.013804	0.007592	0.017422	0.00743	-0.0012517	-0.000841248	-7.42836e-05	-0.000774237
60.96	0.0139739	0.00737	0.017735	0.006837	-0.00060063	-0.00085605	0.000259687	-0.00069084
61.2	0.0140335	0.007386	0.017529	0.00738	-0.0005387	-0.000996054	0.000112093	-0.000768445
61.44	0.0140218	0.00739	0.017444	0.007456	-0.00069239	-0.000937579	-0.000121589	-0.000858068
61.68	0.0143265	0.007351	0.017775	0.007432	-0.000739228	-0.000535276	4.11798e-06	-0.000664366
61.92	0.0141051	0.007728	0.018068	0.00717	-0.000456202	-0.000761018	0.000163952	-0.000171996
62.16	0.014021	0.007399	0.01766	0.007367	-0.000767305	-0.00100835	3.48056e-05	-0.000770225
62.4	0.0135324	0.007412	0.017345	0.00735	-0.00117886	-0.000808655	-0.000354245	-0.000881823
62.64	0.0141558	0.007577	0.017786	0.007003	-0.000415571	-0.000797186	-0.000366615	-0.00107045
62.88	0.0140127	0.007293	0.017553	0.00732	-0.000547108	-0.000609671	-6.52312e-05	-0.000326042
63.12	0.0138001	0.007642	0.017697	0.007004	-0.000439876	-0.00096886	-0.000221168	-0.000895806
63.36	0.0138525	0.007429	0.017576	0.007257	-0.000697285	-0.000540986	-4.54219e-05	-0.000507639
63.6	0.013844	0.00723	0.017968	0.006914	-0.000324398	-0.000661988	-0.000193378	-0.000438919
63.84	0.0142266	0.007617	0.017649	0.00724	-0.000152962	-0.000944737	0.000132319	-0.000820771
64.08	0.0136648	0.007171	0.017574	0.006719	-0.000719797	-0.000756792	-1.29945e-07	-0.0010209
64.32	0.0142094	0.007656	0.017458	0.007284	-0.000680767	-0.000758906	9.44137e-05	-0.000710554
64.56	0.0137822	0.007118	0.017542	0.007107	-0.000484934	-0.000837731	-0.000230136	-0.000231796
64.8	0.0143536	0.007642	0.017307	0.006966	-7.68153e-05	-0.000961334	-0.000191313	-0.000776154
65.04	0.0144243	0.007393	0.017532	0.007008	-0.000583823	-0.00112254	-0.000117247	-0.000803319
65.28	0.0139446	0.006944	0.017526	0.006551	-0.0005871	-0.000788935	0.000139831	-0.000671088
65.52	0.014144	0.007343	0.017359	0.006728	-0.000667387	-0.00122541	-0.000126769	-0.000726693
65.76	0.0148804	0.007274	0.017101	0.00687	-0.000837388	-0.0010981	-0.000237959	-0.000834277
66	0.0138031	0.007327	0.017443	0.00724	-0.000282481	-0.00108918	-0.000522639	-0.00102993
66.24	0.0141604	0.007637	0.01742	0.006779	-0.000455571	-0.000950944	-0.000352523	-0.00090043
66.48	0.0139262	0.007278	0.017293	0.006479	-0.00101242	-0.000870042	-0.000411709	-0.000758598
66.72	0.0142507	0.007105	0.017009	0.006887	-0.00111013	-0.000705895	-0.000334336	-0.000912676
66.96	0.0141715	0.007081	0.017402	0.006848	-0.000932914	-0.000760006	-7.58228e-06	-0.000477871
67.2	0.0139653	0.007247	0.017677	0.006759	-0.00100693	-0.000777429	-0.000174933	-0.000704945
67.44	0.0145523	0.007222	0.017311	0.007122	-0.00114448	-0.000801325	-0.000489444	-0.0009185
67.68	0.0142793	0.007071	0.017075	0.006751	-0.000724297	-0.00119051	-0.000221503	-0.000652521
67.92	0.0144729	0.007159	0.01718	0.007121	-0.000677029	-0.000877581	-0.000297914	-0.000755867
68.16	0.0141898	0.007001	0.017531	0.006336	-0.000976977	-0.000712313	-0.000444193	-0.000950851
68.4	0.0143105	0.007194	0.017	0.007652	-0.00082545	-0.001088	-8.60113e-05	-0.000787647
68.64	0.014339	0.0071	0.017593	0.006941	-0.000601348	-0.000927293	-0.00033917	-0.000702747
68.88	0.0137389	0.007221	0.017152	0.007422	-0.000907946	-0.00103589	-0.000150844	-0.00105789
69.12	0.013805	0.006912	0.017183	0.006564	-0.00103154	-0.000783368	-0.000216639	-0.000922848
69.36	0.0144719	0.00732	0.017479	0.006288	-0.000634464	-0.000937326	0.000296353	-0.000927992
69.6	0.0142534	0.006841	0.017084	0.006579	-0.00121976	-0.00104382	-5.26168e-05	-0.000988022
69.84	0.0139671	0.006945	0.017621	0.00687	-0.000820307	-0.00069095	-0.000296743	-0.000775351
70.08	0.0141529	0.007114	0.017314	0.006967	-0.000885278	-0.000816937	-0.00062102	-0.000675571
70.32	0.0138716	0.006861	0.017332	0.007008	-0.000688335	-0.00120024	-6.14584e-05	-0.000861626
70.56	0.0139995	0.007016	0.017239	0.006628	-0.000664815	-0.000769884	-4.75716e-05	-0.00056872
70.8	0.0146037	0.007049	0.0169	0.006803	-0.000984002	-0.000822321	-0.000356989	-0.000805872
71.04	0.0140407	0.006669	0.017187	0.007031	-0.000991732	-0.000831226	-0.000207369	-0.00109824
71.28	0.0143537	0.006719	0.017018	0.006561	-0.00064408	-0.00098982	-0.000257653	-0.000903703
71.52	0.0141901	0.007059	0.016807	0.00679	-0.000848815	-0.00134074	5.64245e-05	-0.000696656
71.76	0.0143932	0.006744	0.016964	0.006893	-0.000693147	-0.000839737	-0.000107984	-0.00101965
72	0.014352	0.006628	0.01701	0.006869	-0.00123491	-0.00116699	-0.000155604	-0.000907674
72.24	0.0143037	0.006567	0.016552	0.006665	-0.000580293	-0.00133261	-7.23785e-05	-0.00058801
72.48	0.0140925	0.006965	0.017022	0.006207	-0.00085023	-0.00087811	2.15793e-05	-0.00110644
72.72	0.014364	0.006863	0.017011	0.006938	-0.000735119	-0.000933566	-0.000386535	-0.000962336
72.96	0.0142858	0.006762	0.016896	0.006852	-0.000731997	-0.00123771	-0.000259305	-0.000629677
73.2	0.0141633	0.00703	0.016834	0.006558	-0.000432657	-0.00100656	-0.000383872	-0.000950835
73.44	0.014318	0.006504	0.017036	0.006723	-0.000933299	-0.00093008	-0.000336921	-0.000854673
73.68	0.0146704	0.006439	0.016749	0.006778	-0.000678383	-0.000908273	-0.00044169	-0.000567806
73.92	0.0138787	0.006639	0.016734	0.006672	-0.000665629	-0.00110499	-0.000174878	-0.000759247
74.16	0.0140412	0.007096	0.016874	0.006793	-0.000865207	-0.00109288	-5.84068e-05	-0.000976187
74.4	0.0143245	0.0066	0.016796	0.006767	-0.000644224	-0.0010066	-0.000167505	-0.000643952
74.64	0.0143925	0.006459	0.016822	0.006392	-0.00094926	-0.000845859	-0.000225824	-0.00107286
74.88	0.0143319	0.006722	0.016867	0.006538	-0.000630261	-0.000886018	5.08074e-05	-0.000888851
75.12	0.0142686	0.006548	0.017073	0.006296	-0.0010507	-0.00109236	-2.00236e-05	-0.00108121
75.36	0.0141729	0.006425	0.016599	0.006424	-0.00107007	-0.00107905	-5.88857e-06	-0.000707903
75.6	0.014557	0.006594	0.016838	0.006156	-0.000755798	-0.000822766	-8.09617e-05	-0.000702266
75.84	0.0141272	0.00658	0.016873	0.006324	-0.00086044	-0.00116976	-0.00011778	-0.000835832
76.08	0.0145305	0.006499	0.01664	0.006701	-0.000736658	-0.00104332	0.000119787	-0.00114666
76.32	0.0142475	0.006424	0.016731	0.006547	-0.00134189	-0.00128902	0.000113315	-0.000961456
76.56	0.0140471	0.006747	0.016884	0.006761	-0.00101927	-0.000933649	-0.000199494	-0.000599769
76.8	0.0142319	0.006298	0.016561	0.006603	-0.000878996	-0.000837134	-0.000162641	-0.000984472
77.04	0.0139899	0.006116	0.016548	0.006093	-0.000815041	-0.00105235	-0.00026964	-0.000830249
77.28	0.0140363	0.006695	0.016736	0.006631	-0.000983598	-0.00105305	-0.000427239	-0.000966216
77.52	0.0142666	0.006744	0.016538	0.006522	-0.00087114	-0.000855391	-0.000321574	-0.00088125
77.76	0.0141576	0.006697	0.016702	0.006191	-0.00118217	-0.000813725	-0.000423191	-0.000817383
78	0.0142084	0.006431	0.016879	0.006626	-0.000758567	-0.00100768	-9.71662e-05	-0.000725035
78.24	0.0145032	0.00652	0.016685	0.006351	-0.00064567	-0.00108558	-0.000332932	-0.000915857
78.48	0.0143207	0.006455	0.01659	0.005941	-0.001085	-0.00109821	-0.000106462	-0.000919238
78.72	0.0142488	0.006327	0.016489	0.005937	-0.000866685	-0.00094388	-0.000327863	-0.000904456
78.96	0.0142504	0.006342	0.016514	0.005453	-0.000972709	-0.00127412	-0.0001457	-0.000775995
79.2	0.0145128	0.006482	0.016502	0.006513	-0.00118326	-0.000764728	-0.000181485	-0.00070165
79.44	0.0142972	0.006251	0.016378	0.006146	-0.000384807	-0.00115639	7.70468e-05	-0.000897265
79.68	0.0144131	0.006458	0.016391	0.006364	-0.0010072	-0.00139658	-0.000524871	-0.00108702
79.92	0.0148854	0.006196	0.016497	0.006407	-0.00119406	-0.000916474	-0.000161418	-0.000762125
80.16	0.0141837	0.006177	0.016583	0.006176	-0.000936774	-0.00116556	-0.000366603	-0.00124474
80.4	0.0143126	0.006229	0.016471	0.006594	-0.00107189	-0.00130108	-0.000317551	-0.000998123
80.64	0.0143596	0.006371	0.016123	0.006446	-0.000805069	-0.000928732	-0.000469066	-0.000649983
80.88	0.0139565	0.006449	0.016306	0.005747	-0.000796066	-0.00118248	-0.000413486	-0.000809831
81.12	0.0140088	0.006109	0.016305	0.006077	-0.000984452	-0.000704517	-5.88252e-05	-0.000811043
81.36	0.0143874	0.005957	0.016158	0.006254	-0.00098435	-0.00106511	-0.000487382	-0.000683227
81.6	0.0138294	0.005971	0.016098	0.006118	-0.00111623	-0.000870971	-0.000268176	-0.000863344
81.84	0.0146934	0.006379	0.01662	0.006027	-0.00106754	-0.00101783	-0.000263752	-0.000983894
82.08	0.014288	0.005763	0.016357	0.006022	-0.000613653	-0.00102395	-0.000137869	-0.000739505
82.32	0.013909	0.006446	0.016564	0.006052	-0.00103732	-0.00106283	-0.000265747	-0.00108119
82.56	0.0140362	0.006138	0.016135	0.006248	-0.000582722	-0.00119674	-0.000296186	-0.000891448
82.8	0.0143459	0.006213	0.016269	0.005747	-0.000930966	-0.00112276	1.71935e-05	-0.000853376
83.04	0.0138684	0.006206	0.016154	0.005958	-0.00101991	-0.00141371	-0.000217409	-0.000899158
83.28	0.0140299	0.006107	0.016146	0.005502	-0.00110967	-0.00112171	-0.000359794	-0.00113771
83.52	0.0142627	0.00588	0.015821	0.005846	-0.00109344	-0.00116984	6.251e-06	-0.000805327
83.76	0.0143736	0.005881	0.016182	0.006212	-0.000728862	-0.0013348	-0.000316165	-0.000974002
84	0.0143805	0.00593	0.015988	0.005831	-0.00133256	-0.0011757	-0.000176702	-0.00139303
84.24	0.0140119	0.005897	0.015983	0.005786	-0.000913638	-0.000911311	-0.000567578	-0.000931271
84.48	0.0142875	0.005982	0.015909	0.005895	-0.00084426	-0.00105144	-0.000351202	-0.00122361
84.72	0.014159	0.005823	0.016065	0.005278	-0.00113024	-0.00108508	-0.000316084	-0.00113259
84.96	0.0145565	0.005801	0.016189	0.005858	-0.000999134	-0.0012291	-0.000228194	-0.000684156
85.2	0.0143751	0.005859	0.016138	0.005842	-0.000848339	-0.00110035	-0.000206224	-0.00138245
85.44	0.0142112	0.006005	0.015897	0.005584	-0.000955814	-0.00129952	-3.19599e-05	-0.00124333
85.68	0.0145845	0.005787	0.016243	0.006201	-0.00128834	-0.00138123	-0.000242422	-0.00081609
85.92	0.0141275	0.005794	0.016027	0.00582	-0.00101769	-0.00148515	-0.000438708	-0.000770691
86.16	0.0143686	0.005474	0.01595	0.00544	-0.00122557	-0.00134393	-0.000113676	-0.00101228
86.4	0.0147253	0.005489	0.015695	0.005486	-0.00114106	-0.0013573	-0.000367474	-0.000947873
86.64	0.0146261	0.005514	0.016154	0.006293	-0.000943582	-0.0010048	-0.00033917	-0.000917493
86.88	0.0142365	0.005835	0.015681	0.005836	-0.00121798	-0.00127156	-0.000262267	-0.000991199
87.12	0.0140455	0.005795	0.015591	0.005523	-0.000706218	-0.00125798	-0.000359478	-0.000943408
87.36	0.0142099	0.005766	0.015853	0.005506	-0.0012603	-0.00119638	-0.000211048	-0.000910997
87.6	0.014416	0.005703	0.015461	0.005724	-0.00120392	-0.00119891	-0.000253885	-0.00058845
87.84	0.0145583	0.006135	0.01569	0.005555	-0.000982527	-0.00140527	-0.000200967	-0.00127663
88.08	0.0144987	0.005634	0.015602	0.005485	-0.00115296	-0.00107265	-0.000329164	-0.00106444
88.32	0.0144246	0.005723	0.015772	0.005281	-0.00133405	-0.00129551	-0.000340265	-0.000909492
88.56	0.0140923	0.005608	0.016028	0.005551	-0.000812389	-0.00120196	-0.000407953	-0.000982177
88.8	0.0139659	0.006012	0.015836	0.005786	-0.00108464	-0.00113619	-0.000288761	-0.00128289
89.04	0.0139919	0.005645	0.015994	0.005754	-0.0011779	-0.00145619	-0.000319866	-0.00092909
89.28	0.0143539	0.005572	0.015806	0.006097	-0.00118116	-0.00151931	-0.000276895	-0.00105099
89.52	0.0145711	0.005657	0.015865	0.005665	-0.00110954	-0.00109054	-0.000343794	-0.000823755
89.76	0.0142516	0.005556	0.015495	0.00529	-0.000883108	-0.00104931	-0.000324144	-0.00076587
90	0.0140853	0.005041	0.01573	0.005768	-0.00115946	-0.00131712	-0.000311765	-0.0012739
90.24	0.0141716	0.00539	0.015376	0.005409	-0.0008802	-0.00113115	-0.000404561	-0.00102056
90.48	0.0142038	0.005654	0.015784	0.005661	-0.000816156	-0.00157124	-4.03886e-05	-0.000804019
90.72	0.0142937	0.005506	0.015598	0.00609	-0.00104541	-0.0012181	-0.000449964	-0.000683689
90.96	0.0141028	0.005133	0.015476	0.005794	-0.00106281	-0.00153641	-0.00014109	-0.00122125
91.2	0.0139693	0.005544	0.015651	0.005656	-0.00112796	-0.0010753	-0.000256176	-0.000762828
91.44	0.0139625	0.005472	0.015727	0.005431	-0.000879351	-0.00120546	-0.000170254	-0.0013324
91.68	0.0140782	0.005178	0.01533	0.005721	-0.00122351	-0.00115525	-0.000475066	-0.00106901
91.92	0.0143911	0.005799	0.015683	0.005346	-0.00113447	-0.00099827	-0.000194755	-0.00102383
92.16	0.0144049	0.00521	0.015156	0.005319	-0.00113448	-0.00126615	-0.000563715	-0.00111689
92.4	0.0141153	0.005507	0.015261	0.005585	-0.00119313	-0.00163304	-0.00048094	-0.000860172
92.64	0.0140433	0.005341	0.015328	0.005484	-0.00144507	-0.00127229	-0.000272672	-0.00121882
92.88	0.0145899	0.005754	0.015797	0.00551	-0.00111929	-0.00161908	-0.000713962	-0.00128345
93.12	0.0141089	0.005555	0.01553	0.006113	-0.00138966	-0.00116194	-0.00032871	-0.00111063
93.36	0.0145092	0.005304	0.01558	0.005333	-0.000703811	-0.00138547	-0.000423297	-0.000874101
93.6	0.0145155	0.0055	0.014982	0.005628	-0.0013691	-0.00122837	-0.000151723	-0.00124145
93.84	0.013646	0.005467	0.015183	0.005082	-0.000927951	-0.00148304	-0.000314452	-0.00104449
94.08	0.0144212	0.005233	0.015116	0.005444	-0.00124424	-0.000997149	-0.000263067	-0.00109864
94.32	0.0140969	0.00552	0.015378	0.004877	-0.00128237	-0.00155763	-0.000382509	-0.000979695
94.56	0.0138213	0.005202	0.0152	0.005378	-0.00123231	-0.00114891	-0.000226643	-0.00133803
94.8	0.0139594	0.005172	0.01534	0.005261	-0.00130517	-0.00123653	-0.000110771	-0.00106118
95.04	0.0145486	0.00557	0.014991	0.005627	-0.000936325	-0.00134253	-0.000326668	-0.00127165
95.28	0.0144235	0.005225	0.014732	0.005108	-0.00137694	-0.00142709	-0.000274347	-0.00119607
95.52	0.0140889	0.005063	0.014974	0.005329	-0.00108764	-0.00141106	-0.00018424	-0.00110836
95.76	0.0142317	0.005321	0.015288	0.004895	-0.00113988	-0.0013339	-0.000319534	-0.00124574
96	0.0138603	0.005004	0.015298	0.005172	-0.00108219	-0.00132414	-0.000442749	-0.00132823
96.24	0.0142402	0.005203	0.014893	0.005664	-0.00114856	-0.00140138	-0.000508639	-0.00100205
96.48	0.0140118	0.00515	0.015439	0.00507	-0.00136091	-0.00118358	-0.000419361	-0.000714699
96.72	0.0140528	0.005421	0.01513	0.004825	-0.00124761	-0.00133974	-0.000415009	-0.000893657
96.96	0.0141177	0.004781	0.015198	0.005292	-0.00105699	-0.00149424	-0.000118148	-0.000778264
97.2	0.0141371	0.005173	0.015087	0.005781	-0.00099284	-0.00160592	-0.000669898	-0.000730181
97.44	0.0139319	0.004616	0.014993	0.005549	-0.00113224	-0.0015947	-0.00055676	-0.00119667
97.68	0.013866	0.005367	0.014895	0.005233	-0.0011082	-0.00134979	-0.000262086	-0.000876074
97.92	0.0138526	0.005033	0.014563	0.005541	-0.00106804	-0.00142609	-0.000481611	-0.00145648
98.16	0.0140982	0.004981	0.014727	0.005541	-0.00104618	-0.00139044	-0.000489366	-0.000950124
98.4	0.0138381	0.00509	0.014954	0.005601	-0.0012281	-0.00145501	-0.000471982	-0.00105621
98.64	0.0144243	0.004716	0.0148	0.005565	-0.00109742	-0.00138653	-0.000487532	-0.0009142
98.88	0.014216	0.005074	0.014707	0.004981	-0.00105043	-0.0014788	-0.000226839	-0.000977935
99.12	0.0142264	0.004465	0.014587	0.004994	-0.00099687	-0.00153253	-0.000431142	-0.00115246
99.36	0.0139976	0.004887	0.01516	0.005125	-0.00137514	-0.00141982	-0.000508995	-0.00123045
99.6	0.0138847	0.005294	0.014944	0.005036	-0.00130117	-0.00133841	-0.000363863	-0.000649721
99.84	0.0140051	0.004791	0.014573	0.004801	-0.00123789	-0.00121784	-0.000406027	-0.00116212
100.08	0.0146455	0.005062	0.01441	0.005117	-0.00169452	-0.00132085	-0.000471565	-0.000853418
100.32	0.0142888	0.005101	0.015139	0.005283	-0.00108321	-0.00118023	-0.000577949	-0.00117495
100.56	0.0143427	0.004743	0.014623	0.005074	-0.00121285	-0.00134243	-0.000162506	-0.00117384
100.8	0.0135113	0.004825	0.014824	0.005613	-0.00102309	-0.00135569	-0.000689579	-0.00118161
101.04	0.0144607	0.004816	0.014434	0.005282	-0.00132949	-0.00122295	-0.000178395	-0.00134758
101.28	0.0143798	0.005021	0.014606	0.004838	-0.00122811	-0.00168693	-0.000664457	-0.00117656
101.52	0.0138753	0.004989	0.014709	0.005469	-0.00125756	-0.00119933	-0.000358458	-0.000689231
101.76	0.0140284	0.00516	0.014409	0.004866	-0.00122052	-0.00156066	-0.000631067	-0.000730246
102	0.0144155	0.005043	0.014713	0.005052	-0.00172288	-0.00137201	-0.000600619	-0.00134587
102.24	0.0137759	0.004842	0.014763	0.004673	-0.00106003	-0.00163104	-0.000308837	-0.000925752
102.48	0.0141815	0.004468	0.014681	0.004836	-0.00166658	-0.00127787	-0.000193239	-0.000822493
102.72	0.014064	0.004784	0.014642	0.00496	-0.00154214	-0.00144994	-0.000207171	-0.00099162
102.96	0.0139723	0.004967	0.014485	0.004961	-0.00124233	-0.00166745	-0.000276831	-0.00098407
103.2	0.0135193	0.004807	0.014008	0.004954	-0.00137536	-0.00153016	-0.000866297	-0.00135189
103.44	0.0139431	0.004773	0.014506	0.004842	-0.00135579	-0.00154345	-5.02553e-05	-0.00133833
103.68	0.0142628	0.00483	0.013981	0.004886	-0.00159167	-0.00139573	-0.000135585	-0.00073334
103.92	0.014219	0.004855	0.014377	0.004652	-0.00115504	-0.00142721	-0.000552789	-0.00114178
104.16	0.0143779	0.004709	0.014087	0.004502	-0.00139757	-0.00146552	-0.000299403	-0.00136793
104.4	0.013918	0.005088	0.014559	0.004856	-0.000896039	-0.00144614	-0.000475203	-0.00123651
104.64	0.0138166	0.004679	0.01442	0.004903	-0.00114631	-0.00139498	-0.000371471	-0.00106604
104.88	0.0138042	0.005152	0.01446	0.004777	-0.00100759	-0.00172428	-0.000226412	-0.00138901
105.12	0.0139724	0.004689	0.014311	0.004531	-0.00131878	-0.00149751	-0.000469216	-0.000941826
105.36	0.013977	0.004379	0.01396	0.004829	-0.00140747	-0.00138737	-0.000257719	-0.00140606
105.6	0.0143268	0.004682	0.014376	0.004387	-0.00133963	-0.00160017	-0.000459182	-0.00113648
105.84	0.0141408	0.004431	0.014019	0.004639	-0.0014786	-0.00145444	-0.000569199	-0.00114937
106.08	0.0138557	0.004823	0.014198	0.004563	-0.00132332	-0.00132864	-0.000604087	-0.00112741
106.32	0.0141754	0.00461	0.014283	0.005117	-0.000870866	-0.00136073	-0.000217544	-0.00167513
106.56	0.0139985	0.00466	0.014157	0.004338	-0.00149457	-0.00161391	-0.000498197	-0.00127781
106.8	0.0140406	0.004793	0.014383	0.004753	-0.00124466	-0.00133274	-0.000487762	-0.000913321
107.04	0.0139759	0.004731	0.014201	0.00442	-0.00133219	-0.00177642	-0.000460615	-0.00101718
107.28	0.0141707	0.00433	0.014097	0.004765	-0.000905548	-0.00143028	-0.000341668	-0.00155926
107.52	0.0137454	0.004142	0.01413	0.004781	-0.00101393	-0.00143903	-0.000180864	-0.00142311
107.76	0.0143509	0.004604	0.014359	0.004539	-0.00133878	-0.00167395	-0.000422281	-0.00129739
108	0.0142383	0.004415	0.014091	0.004568	-0.00142844	-0.00142843	-0.00062943	-0.00103442
108.24	0.0139245	0.004322	0.014152	0.004439	-0.00126992	-0.00140737	-0.000388689	-0.000921497
108.48	0.0138727	0.004251	0.014283	0.004762	-0.000923072	-0.00160445	-0.000504117	-0.00116683
108.72	0.0139438	0.00479	0.013928	0.004205	-0.00182633	-0.00174313	-0.00036646	-0.00129942
108.96	0.0137056	0.004461	0.014336	0.00441	-0.00135943	-0.00161117	-0.00035809	-0.00121031
109.2	0.0143361	0.004366	0.013897	0.004367	-0.00118676	-0.00153351	-0.000586088	-0.001293
109.44	0.0141314	0.004478	0.013687	0.004836	-0.00151591	-0.0016696	-0.000311039	-0.0011989
109.68	0.0134291	0.00433	0.014223	0.004628	-0.00151727	-0.00116497	-6.4928e-05	-0.00121804
109.92	0.0142558	0.004464	0.014087	0.004707	-0.00148677	-0.0015332	-0.000439268	-0.00131707
110.16	0.0138534	0.004497	0.013788	0.004604	-0.00156102	-0.00120565	-0.00049518	-0.00123007
110.4	0.0142699	0.004296	0.013965	0.00487	-0.00157081	-0.00151853	-2.76477e-05	-0.00145742
110.64	0.0138227	0.004406	0.01338	0.004312	-0.00136849	-0.00145951	-0.000359625	-0.00108831
110.88	0.014112	0.004135	0.013761	0.004045	-0.00148793	-0.00153282	-0.000523103	-0.00147591
111.12	0.014133	0.004373	0.013842	0.004727	-0.00139481	-0.00152593	-0.000596851	-0.00104383
111.36	0.0141525	0.004329	0.013638	0.004965	-0.0012109	-0.00158608	-0.00057006	-0.00141255
111.6	0.0139876	0.004695	0.013606	0.00471	-0.00118786	-0.00177933	-0.000307027	-0.00140175
111.84	0.0144133	0.003962	0.013973	0.004631	-0.00152732	-0.0017966	-0.000704133	-0.00120509
112.08	0.0140113	0.004204	0.013905	0.004228	-0.00163376	-0.00181448	-0.000618149	-0.00106494
112.32	0.0136252	0.004469	0.013727	0.004076	-0.00151888	-0.0017272	-0.000420948	-0.00133381
112.56	0.0142647	0.004371	0.013707	0.004611	-0.00164123	-0.00215504	-0.000454876	-0.00135641
112.8	0.0140428	0.004508	0.013684	0.004233	-0.00133702	-0.00176769	-0.000377986	-0.00130803
113.04	0.0141	0.003938	0.013484	0.00387	-0.00128543	-0.00145353	-0.000359688	-0.0014594
113.28	0.0141592	0.003668	0.013519	0.00415	-0.000870884	-0.00182156	-0.000298996	-0.00139655
113.52	0.0134919	0.004333	0.01408	0.004298	-0.00161951	-0.0015065	-0.000194699	-0.0014932
113.76	0.0134902	0.004022	0.013951	0.004213	-0.00162467	-0.00172708	-0.000362273	-0.00110506
114	0.0143596	0.004149	0.01346	0.004445	-0.00139524	-0.00149851	-0.000494368	-0.0011195
114.24	0.0137643	0.004191	0.013344	0.004531	-0.00137114	-0.00185353	-0.000698499	-0.0014837
114.48	0.0140167	0.004299	0.013504	0.004081	-0.00132283	-0.00141947	-0.00016798	-0.00149418
114.72	0.0140881	0.004287	0.013733	0.004401	-0.00152996	-0.00161993	-0.000171582	-0.00110822
114.96	0.014103	0.004361	0.013342	0.004131	-0.00144774	-0.00126974	-0.000589116	-0.00137334
115.2	0.0139643	0.004037	0.013334	0.004263	-0.00162217	-0.00176957	-0.000423857	-0.0016252
115.44	0.0143181	0.003875	0.01343	0.004432	-0.00162773	-0.0017654	-0.000306069	-0.00127787
115.68	0.0137806	0.004277	0.013609	0.004334	-0.00106499	-0.00171516	-0.000401476	-0.00133843
115.92	0.0135317	0.004077	0.013475	0.004032	-0.00145882	-0.00151227	-0.000602632	-0.00143684
116.16	0.0139698	0.004204	0.013318	0.004131	-0.000887296	-0.00151225	-0.000433199	-0.00139323
116.4	0.0138253	0.004351	0.013342	0.004159	-0.00175321	-0.00152623	-0.000587746	-0.00131888
116.64	0.014039	0.004098	0.013082	0.004307	-0.00149201	-0.00162937	-0.000567146	-0.00111256
116.88	0.0141989	0.003756	0.013396	0.004224	-0.00138995	-0.00172375	-0.000223851	-0.00104611
117.12	0.0137654	0.004127	0.013231	0.004229	-0.00154585	-0.00151674	-0.000512284	-0.00162626
117.36	0.0135528	0.004194	0.013205	0.004398	-0.00111549	-0.00157208	-0.000514149	-0.00116652
117.6	0.0141027	0.00408	0.013486	0.003929	-0.00133176	-0.00158774	-0.000458478	-0.00116756
117.84	0.0140297	0.003971	0.013329	0.004475	-0.00161149	-0.00181768	-0.000514523	-0.0012058
118.08	0.0140506	0.003942	0.013515	0.004618	-0.00129116	-0.0018107	-0.00052312	-0.00117376
118.32	0.0138041	0.004062	0.012901	0.004233	-0.00216688	-0.00155579	-0.000364671	-0.0015205
118.56	0.0141569	0.004169	0.012958	0.004344	-0.00162522	-0.00172498	-0.000691351	-0.00116746
118.8	0.0135989	0.004123	0.013128	0.004048	-0.00171648	-0.00173371	-0.000566835	-0.00125028
119.04	0.0134591	0.004558	0.013133	0.004073	-0.00124833	-0.00183193	-0.000571723	-0.00116997
119.28	0.013995	0.004091	0.013093	0.00399	-0.00120113	-0.00195084	-0.00032385	-0.00123587
119.52	0.0138048	0.00409	0.013193	0.003687	-0.00125509	-0.00162799	-0.000348882	-0.00139067
119.76	0.0136092	0.003877	0.013262	0.004376	-0.00115717	-0.00130039	-0.000843805	-0.00129567
120	0.0134334	0.003767	0.012897	0.004003	-0.00144825	-0.00160264	-0.000321029	-0.00118056
120.24	0.0134123	0.003907	0.013187	0.004226	-0.0013441	-0.00164154	-0.000645848	-0.00146565
120.48	0.0139788	0.004042	0.013008	0.003796	-0.00141	-0.00147151	-0.000490198	-0.00117519
120.72	0.0139247	0.004051	0.013083	0.004209	-0.00179367	-0.00172152	-0.00036566	-0.00128657
120.96	0.0136354	0.004125	0.013003	0.004086	-0.000919632	-0.00172534	-0.000540322	-0.00164329
121.2	0.0136415	0.003917	0.012717	0.003761	-0.00175323	-0.00183248	-0.000620008	-0.00103916
121.44	0.0140029	0.003458	0.013107	0.004028	-0.00185543	-0.00140459	-0.000426942	-0.0017179
121.68	0.0137477	0.004027	0.012959	0.004077	-0.00184116	-0.00167771	-0.000575899	-0.00142537
121.92	0.0141317	0.003565	0.012836	0.004187	-0.00148613	-0.00174085	-0.000196925	-0.00175865
122.16	0.013614	0.003866	0.0131	0.003639	-0.00175571	-0.0016468	-0.000538092	-0.00143157
122.4	0.0138705	0.003828	0.012583	0.003663	-0.00158064	-0.00197659	-0.000689003	-0.00129781
122.64	0.0139734	0.003811	0.01303	0.003489	-0.00158832	-0.00180544	-0.000584218	-0.00139339
122.88	0.0137281	0.003838	0.012909	0.003807	-0.0015294	-0.00165184	-0.00069701	-0.00143226
123.12	0.0136857	0.003771	0.012962	0.004346	-0.00108998	-0.00188922	-0.000536618	-0.00142816
123.36	0.0137879	0.003875	0.0127	0.003629	-0.00150734	-0.00190762	-0.000723495	-0.00134236
123.6	0.013696	0.0038	0.01236	0.003917	-0.00153484	-0.00180371	-0.000433581	-0.00118321
123.84	0.0138743	0.003613	0.012848	0.003971	-0.00161422	-0.00196662	-0.000312584	-0.00100197
124.08	0.0137371	0.003495	0.012774	0.004351	-0.0015605	-0.00179858	-0.000116255	-0.00142539
124.32	0.0135715	0.003503	0.012707	0.004096	-0.00186187	-0.00193557	-0.000375108	-0.0016995
124.56	0.0140068	0.003614	0.012228	0.003648	-0.00186217	-0.00176258	-0.000472534	-0.00130355
124.8	0.0136141	0.003837	0.012898	0.004125	-0.00204905	-0.00179638	-0.0006229	-0.0015925
125.04	0.0136868	0.003735	0.012992	0.003359	-0.00139501	-0.00178534	-0.000750262	-0.000964619
125.28	0.0141679	0.003718	0.01296	0.003355	-0.00173562	-0.0019687	-0.000370079	-0.00158896
125.52	0.0140551	0.003697	0.012498	0.003989	-0.00166209	-0.00195566	-0.000484145	-0.00179941
125.76	0.0134932	0.003429	0.012599	0.003671	-0.00155613	-0.00168178	-0.000602686	-0.00127114
126	0.013942	0.003345	0.012735	0.003369	-0.00193573	-0.00193411	-0.000717784	-0.00169039
126.24	0.0135859	0.003768	0.012314	0.003582	-0.0018776	-0.00181412	-0.000717595	-0.00150856
126.48	0.0135121	0.003589	0.012854	0.004067	-0.00157888	-0.00176677	-0.000384371	-0.00143128
126.72	0.0137434	0.003332	0.012624	0.004035	-0.00169465	-0.00150598	-0.000557676	-0.00118371
126.96	0.0139001	0.003686	0.012622	0.003812	-0.00116044	-0.00204719	-0.000585816	-0.00126255
127.2	0.0136215	0.003665	0.012183	0.003832	-0.00151964	-0.00198679	-0.000499858	-0.00127562
127.44	0.0138028	0.003569	0.012704	0.003441	-0.0011472	-0.00158709	-0.000659759	-0.00116705
127.68	0.0138949	0.003587	0.012559	0.003814	-0.00135023	-0.00166184	-0.00054639	-0.00170813
127.92	0.0140549	0.00358	0.012676	0.003351	-0.0011075	-0.00162182	-0.000540043	-0.00165478
128.16	0.0135788	0.003528	0.012277	0.003804	-0.00143958	-0.00168729	-0.000387458	-0.00147768
128.4	0.0136086	0.003839	0.012283	0.003569	-0.00176299	-0.00176594	-0.000548685	-0.00166155
128.64	0.0137073	0.003533	0.012726	0.003699	-0.00147039	-0.00168837	-0.000427002	-0.00157683
128.88	0.0136446	0.003446	0.012146	0.003516	-0.00150356	-0.00197227	-0.000594859	-0.00142564
129.12	0.0136502	0.003575	0.012343	0.003534	-0.00182204	-0.00159088	-0.000477696	-0.00132526
129.36	0.0133156	0.00359	0.012064	0.003455	-0.0011516	-0.00177841	-0.000228363	-0.00160508
129.6	0.0138738	0.003631	0.012437	0.003856	-0.00156233	-0.00180575	-0.000420631	-0.00132878
129.84	0.0136554	0.003775	0.012221	0.003479	-0.00142431	-0.00152908	-0.000477311	-0.00128995
130.08	0.0132307	0.003121	0.012285	0.003665	-0.00168323	-0.00194445	-0.00074135	-0.00140743
130.32	0.0133452	0.003606	0.012642	0.003982	-0.00193413	-0.00166908	-0.000797241	-0.00102897
130.56	0.0137073	0.003542	0.012018	0.003347	-0.00144209	-0.00184138	-0.000585963	-0.00184462
130.8	0.0137893	0.002983	0.012202	0.003657	-0.00154573	-0.00201246	-0.000750173	-0.00153983
131.04	0.0136045	0.003412	0.012278	0.003557	-0.00141771	-0.0016525	-0.000493437	-0.00163235
131.28	0.0137688	0.003323	0.012116	0.003327	-0.00190346	-0.00183086	-0.000294437	-0.00119763
131.52	0.0135953	0.003389	0.0121	0.002983	-0.00137786	-0.0020275	-0.000648288	-0.00116595
131.76	0.0138904	0.003404	0.011984	0.003328	-0.00154828	-0.00189986	-0.000698151	-0.00181953
132	0.0136826	0.003259	0.01204	0.003234	-0.00150789	-0.0018242	-0.0007052	-0.00160751
132.24	0.0136353	0.003543	0.011881	0.003638	-0.00164989	-0.0019136	-0.000368414	-0.00163842
132.48	0.0132657	0.00324	0.012246	0.003388	-0.00179075	-0.00204093	-0.000734654	-0.00140666
132.72	0.013574	0.003062	0.012063	0.003053	-0.00152715	-0.00187674	-0.000670218	-0.00155094
132.96	0.0137868	0.00321	0.012134	0.003427	-0.00150727	-0.00216456	-0.000599156	-0.00180934
133.2	0.0135438	0.003519	0.011873	0.00344	-0.00161142	-0.00194886	-0.000464072	-0.00154618
133.44	0.0138039	0.003174	0.012114	0.003156	-0.00178093	-0.00176987	-0.000595088	-0.00130495
133.68	0.0133353	0.003452	0.012046	0.003383	-0.00141582	-0.00168981	-0.000670115	-0.00123022
133.92	0.0134624	0.003512	0.012277	0.00346	-0.00152786	-0.00194626	-0.000552893	-0.00134543
134.16	0.0134768	0.003254	0.012081	0.003742	-0.00153312	-0.00205497	-0.000520519	-0.0013234
134.4	0.0132567	0.003454	0.011855	0.003341	-0.0017783	-0.00225983	-0.000675926	-0.00134543
134.64	0.013728	0.003288	0.011747	0.003689	-0.00149001	-0.00206512	-0.000259533	-0.00127601
134.88	0.0133544	0.003247	0.011804	0.003282	-0.00148805	-0.00186117	-0.000761461	-0.00165806
135.12	0.0132572	0.003093	0.011962	0.003847	-0.00150766	-0.00212795	-0.000544977	-0.00123224
135.36	0.0137018	0.0033	0.011913	0.003387	-0.00228054	-0.00219418	-0.000369087	-0.00144313
135.6	0.013627	0.003268	0.01181	0.003671	-0.00145936	-0.00176877	-0.000935609	-0.00130326
135.84	0.0135358	0.003378	0.012059	0.003492	-0.00186207	-0.00199239	-0.000680677	-0.00141678
136.08	0.0133531	0.003511	0.011582	0.003174	-0.00226096	-0.00212102	-0.000921644	-0.00149749
136.32	0.0136101	0.003495	0.011746	0.00318	-0.00171057	-0.00178155	-0.000560046	-0.00153243
136.56	0.0137011	0.00317	0.011727	0.003347	-0.00137979	-0.00193742	-0.00066024	-0.00169031
136.8	0.0133735	0.003273	0.011999	0.003029	-0.00184474	-0.00182957	-0.000535223	-0.00142413
137.04	0.0131352	0.003239	0.011777	0.003224	-0.00188988	-0.00206628	-0.00018513	-0.00186326
137.28	0.013634	0.003107	0.011898	0.00275	-0.00157349	-0.00159367	-0.000608052	-0.00141856
137.52	0.0133472	0.003014	0.011439	0.003053	-0.00172178	-0.00182731	-0.000853358	-0.00151198
137.76	0.013365	0.003164	0.011414	0.002932	-0.00180871	-0.00188757	-0.000812171	-0.0013375
138	0.0134944	0.003039	0.011884	0.003445	-0.00174693	-0.00182583	-0.000623427	-0.00135162
138.24	0.0133289	0.003059	0.011415	0.003388	-0.00120031	-0.00201232	-0.000843456	-0.00151739
138.48	0.0136665	0.003293	0.0115	0.003525	-0.00200229	-0.00207981	-0.000479055	-0.00125402
138.72	0.0133113	0.002995	0.011851	0.00317	-0.00197594	-0.00179673	-0.000885862	-0.0019137
138.96	0.013379	0.003258	0.011638	0.003245	-0.00206446	-0.00182555	-0.000679691	-0.00140342
139.2	0.0130004	0.00328	0.011992	0.003001	-0.00162253	-0.0019243	-0.00038049	-0.00168314
139.44	0.0130983	0.00293	0.011315	0.003204	-0.00131561	-0.00186432	-0.000678551	-0.00131934
139.68	0.0131604	0.003207	0.011692	0.003457	-0.00178961	-0.00188131	-0.000531835	-0.0017158
139.92	0.0132077	0.003232	0.011378	0.003101	-0.00148657	-0.00216658	-0.000681287	-0.0011873
140.16	0.0133586	0.003152	0.011881	0.003559	-0.00192345	-0.00233508	-0.000448084	-0.00143662
140.4	0.0133224	0.002983	0.011973	0.003287	-0.00187708	-0.00181102	-0.000634881	-0.00151727
140.64	0.013353	0.003025	0.011347	0.003148	-0.00178326	-0.00201445	-0.000750102	-0.00137785
140.88	0.012661	0.002758	0.011543	0.002757	-0.00214616	-0.00210047	-0.000645419	-0.00157698
141.12	0.0134919	0.003169	0.011521	0.003164	-0.00155091	-0.00207646	-0.000739612	-0.00149957
141.36	0.013835	0.003098	0.01185	0.00315	-0.00171504	-0.00198694	-0.000311882	-0.00147466
141.6	0.0130441	0.002895	0.011514	0.002754	-0.00204682	-0.0018475	-0.000517127	-0.00165775
141.84	0.0132746	0.002949	0.011356	0.002933	-0.00179853	-0.00194184	-0.000892484	-0.00178525
142.08	0.0132538	0.002805	0.011687	0.003207	-0.00201179	-0.00192393	-0.000790962	-0.00164075
142.32	0.0130648	0.00293	0.011386	0.00285	-0.00214905	-0.00199464	-0.000737682	-0.00175521
142.56	0.0132836	0.003024	0.011496	0.002846	-0.00183261	-0.00206684	-0.000605598	-0.00175006
142.8	0.0131527	0.002988	0.011228	0.003096	-0.00221832	-0.00204284	-0.000823831	-0.00187756
143.04	0.0130823	0.003315	0.011128	0.002909	-0.00148004	-0.00198993	-0.000427533	-0.00185963
143.28	0.0132635	0.003033	0.011723	0.002809	-0.00192692	-0.00209639	-0.000865149	-0.00138343
143.52	0.0133116	0.003053	0.011063	0.003312	-0.00183409	-0.00239252	-0.000736745	-0.00125414
143.76	0.0129302	0.003049	0.010791	0.00267	-0.00164127	-0.00223595	-0.000596137	-0.00180595
144	0.0135367	0.002966	0.011441	0.003087	-0.00199856	-0.00186357	-0.000694552	-0.00165685
144.24	0.0127525	0.002984	0.011295	0.002631	-0.00204434	-0.0021234	-0.00080932	-0.00169297
144.48	0.0130568	0.002946	0.01149	0.002797	-0.00184744	-0.00221376	-0.00066425	-0.00162703
144.72	0.0132788	0.003243	0.01165	0.002581	-0.00174613	-0.00213054	-0.000537937	-0.00146745
144.96	0.0131275	0.003067	0.011474	0.002986	-0.00150359	-0.0021013	-0.000398639	-0.0014188
145.2	0.0132547	0.002995	0.011257	0.002971	-0.00156679	-0.00198731	-0.000518639	-0.00151682
145.44	0.0133457	0.002829	0.011257	0.003191	-0.00219953	-0.00201698	-0.000532259	-0.00173721
145.68	0.0129381	0.00297	0.010968	0.002927	-0.00201613	-0.00191133	-0.00084945	-0.00149667
145.92	0.0132662	0.003139	0.011307	0.002739	-0.00185243	-0.00215609	-0.000771202	-0.00178679
146.16	0.0129051	0.003053	0.011197	0.002879	-0.00136041	-0.00186389	-0.000518638	-0.00157099
146.4	0.013258	0.002822	0.011237	0.002708	-0.00206805	-0.00177665	-0.000754288	-0.00134184
146.64	0.012912	0.002847	0.011058	0.002939	-0.00154297	-0.00223385	-0.000721596	-0.00176245
146.88	0.0134822	0.002762	0.010428	0.002576	-0.00228088	-0.00213384	-0.0007137	-0.00172595
147.12	0.0131551	0.002732	0.011139	0.002672	-0.00215681	-0.00212046	-0.000772934	-0.00168681
147.36	0.0132299	0.002661	0.011406	0.003016	-0.00192223	-0.00215662	-0.000681911	-0.00161049
147.6	0.0131091	0.0028	0.010992	0.003309	-0.00202882	-0.00219279	-0.000755005	-0.0017562
147.84	0.0135763	0.002934	0.011263	0.002747	-0.00175995	-0.00210912	-0.0004656	-0.0016053
148.08	0.013416	0.003024	0.010922	0.002612	-0.00194583	-0.00216881	-0.000955073	-0.00191427
148.32	0.0131274	0.002581	0.010958	0.003089	-0.00190001	-0.00217672	-0.000650112	-0.00171295
148.56	0.013454	0.002923	0.011092	0.0026	-0.00202863	-0.00214153	-0.00065194	-0.00169126
148.8	0.0133331	0.002568	0.010901	0.002956	-0.0019303	-0.00210563	-0.000683147	-0.00170335
149.04	0.0130518	0.00249	0.011025	0.003083	-0.00156018	-0.00201596	-0.000671466	-0.00141847
149.28	0.0134092	0.002602	0.011089	0.002866	-0.00205229	-0.00198374	-0.00100903	-0.00181375
149.52	0.0130934	0.002713	0.011016	0.002941	-0.00131303	-0.0025273	-0.000769502	-0.00165646
149.76	0.0134348	0.002726	0.01064	0.002447	-0.00202556	-0.00215005	-0.000484135	-0.00167165
150	0.0132889	0.002764	0.010607	0.002757	-0.00208807	-0.00246076	-0.000583666	-0.00191241
150.24	0.0132487	0.002769	0.010647	0.002507	-0.00253872	-0.00216745	-0.000912287	-0.00180365
150.48	0.0129332	0.002871	0.011022	0.003186	-0.00196329	-0.00210731	-0.00104446	-0.0014192
150.72	0.013486	0.003031	0.011048	0.002698	-0.00206489	-0.00189897	-0.000893212	-0.00116807
150.96	0.0133052	0.003326	0.011254	0.003057	-0.00191236	-0.00204247	-9.93356e-05	-0.00131974
151.2	0.0135864	0.003432	0.010775	0.003651	-0.00168499	-0.00198599	-0.000731323	-0.00126606
151.44	0.0128322	0.003832	0.011216	0.003228	-0.00187889	-0.0018409	-0.000506039	-0.00130282
151.68	0.0133692	0.003793	0.011116	0.003858	-0.00175572	-0.00163988	-0.000571368	-0.0011317
151.92	0.0136274	0.003644	0.011188	0.003951	-0.00105513	-0.00140362	-0.000325472	-0.000724636
152.16	0.0137914	0.004215	0.011483	0.003951	-0.001055	-0.0012572	7.74322e-05	-0.000324939
152.4	0.0139036	0.003895	0.011541	0.004188	-0.000861186	-0.00148264	-0.000216133	-5.03123e-05
152.64	0.0139966	0.004628	0.011936	0.004184	-0.001279	-0.000947254	-0.000477738	0.00019923
152.88	0.0137092	0.004778	0.012056	0.004361	-0.000704313	-0.0009918	7.08553e-05	4.25496e-05
153.12	0.0138401	0.004863	0.011912	0.00478	-0.000458511	-0.000912973	-9.10705e-05	0.000197408
153.36	0.0143459	0.005013	0.012199	0.004993	-0.000600887	-0.000766753	-0.000252282	0.000629151
153.6	0.0142258	0.004997	0.0125	0.005327	-0.000177646	-0.000467361	0.000149892	0.00079206
153.84	0.0148784	0.005315	0.012501	0.005658	-6.21706e-05	-0.000231917	0.000362655	0.000562324
154.08	0.0144326	0.005712	0.012459	0.005907	0.000320692	-0.000553154	0.000188199	0.000800737
154.32	0.0143469	0.005611	0.012796	0.00547	0.000751633	-0.000243058	0.000193164	0.00099711
154.56	0.014249	0.005827	0.012745	0.006109	0.000284092	-0.000218112	0.00041714	0.00162979
154.8	0.0151081	0.00592	0.013026	0.006116	0.000508595	-0.00020919	0.000117477	0.00153399
155.04	0.015501	0.005651	0.013213	0.00643	0.000694658	0.000201277	0.000396329	0.0018728
155.28	0.0146988	0.006386	0.012986	0.00653	0.000624624	0.000301824	0.000751949	0.00156474
155.52	0.0155079	0.006285	0.013039	0.006686	0.00101393	0.000143488	0.000963023	0.00205922
155.76	0.015446	0.006365	0.013013	0.006856	0.00109128	0.000148743	0.000598306	0.00200895
156	0.0152974	0.006482	0.01335	0.006447	0.000671113	0.000656374	0.000986815	0.00217772
156.24	0.0149766	0.006465	0.013637	0.007004	0.00115895	0.000597008	0.000976541	0.00231601
156.48	0.0157877	0.006729	0.013078	0.006664	0.00154879	0.000673008	0.000803827	0.00232508
156.72	0.015371	0.006741	0.013509	0.007202	0.00121197	0.000886969	0.00140788	0.00246281
156.96	0.015568	0.006381	0.013843	0.007061	0.0013499	0.000866082	0.00121612	0.00220133
157.2	0.016095	0.006934	0.013012	0.006994	0.00152621	0.001184	0.00124312	0.00296486
157.44	0.0154743	0.007096	0.012889	0.007246	0.0018826	0.00101212	0.00090023	0.00259343
157.68	0.0159343	0.006769	0.013806	0.007835	0.00176652	0.000953626	0.00138175	0.00280563
157.92	0.0158082	0.007197	0.013837	0.007318	0.00182106	0.0012724	0.00137631	0.0031809
158.16	0.0162544	0.006962	0.013603	0.007931	0.00163204	0.00139712	0.00127493	0.00295689
158.4	0.0159111	0.006954	0.013854	0.00747	0.00218801	0.00120395	0.00109973	0.0032827
158.64	0.0160887	0.007262	0.013935	0.007337	0.00193714	0.00171018	0.00133746	0.00309875
158.88	0.0163123	0.007326	0.01407	0.007946	0.00191811	0.00127308	0.00168487	0.0031357
159.12	0.0162674	0.007284	0.013983	0.008205	0.002316	0.00136422	0.00185387	0.00379032
159.36	0.0160683	0.007349	0.013705	0.008228	0.00242513	0.00165607	0.00167863	0.00363021
159.6	0.0163265	0.007469	0.013926	0.008066	0.00259431	0.0016695	0.00154175	0.00341393
159.84	0.0165898	0.007358	0.013982	0.008585	0.00223312	0.00177967	0.00161232	0.00401123
160.08	0.0164099	0.007422	0.01421	0.008246	0.00192642	0.00162491	0.00193934	0.00398041
160.32	0.0161954	0.007915	0.013849	0.0083	0.00270976	0.00167152	0.00205469	0.0038801
160.56	0.0165337	0.008033	0.014038	0.00826	0.00270232	0.00179918	0.00208981	0.00412598
160.8	0.0168128	0.007699	0.014048	0.008578	0.00267528	0.00184589	0.00187874	0.00422507
161.04	0.0163012	0.007831	0.014276	0.00874	0.0026109	0.0019768	0.00203139	0.00395866
161.28	0.0168919	0.007856	0.014122	0.008735	0.0026432	0.00214835	0.00201875	0.00432874
161.52	0.0168457	0.007785	0.014353	0.008785	0.00273225	0.00202871	0.00189829	0.00413994
161.76	0.0164243	0.00788	0.013983	0.008782	0.00316339	0.00202116	0.00200551	0.00444458
162	0.0161951	0.007766	0.013966	0.008609	0.00291968	0.00203804	0.00210613	0.0043979
162.24	0.0166824	0.007745	0.014388	0.00898	0.00323407	0.00212086	0.00244806	0.00404336
162.48	0.0167399	0.007724	0.01425	0.008786	0.00343109	0.002085	0.0022461	0.00430521
162.72	0.01697	0.007858	0.014108	0.008542	0.00329824	0.00227439	0.00193802	0.00411521
162.96	0.017051	0.007988	0.0142	0.008908	0.0034937	0.00243272	0.00231067	0.00478656
163.2	0.0166868	0.00797	0.014556	0.008712	0.00312693	0.00234393	0.00279156	0.00453179
163.44	0.0171832	0.007902	0.014195	0.008799	0.00334489	0.00248229	0.00235062	0.00420993
163.68	0.0167941	0.007921	0.014	0.009243	0.00343011	0.00249322	0.00233263	0.00487457
163.92	0.0170878	0.008234	0.013674	0.009113	0.00393184	0.00255945	0.00246189	0.00462012
164.16	0.0169425	0.008258	0.014613	0.009372	0.00311123	0.00252777	0.00230711	0.00496617
164.4	0.0172836	0.008431	0.014124	0.008641	0.00391815	0.00252157	0.00227126	0.00486308
164.64	0.0172805	0.00804	0.014641	0.00952	0.0035613	0.00243593	0.00254807	0.00518599
164.88	0.0173183	0.00832	0.014145	0.009578	0.00383258	0.00250373	0.00221873	0.00466574
165.12	0.0173624	0.008349	0.01448	0.009324	0.00354241	0.00246662	0.00250532	0.00469013
165.36	0.0180442	0.008396	0.014352	0.009343	0.00368038	0.00273624	0.00256169	0.0052799
165.6	0.0167934	0.0083	0.014208	0.008827	0.00374187	0.00276338	0.00273787	0.00489466
165.84	0.0177487	0.00829	0.014439	0.009209	0.0033957	0.00252933	0.00244414	0.00492887
166.08	0.0171852	0.008107	0.014447	0.009231	0.00416523	0.00260507	0.00231381	0.00513217
166.32	0.0174808	0.008483	0.014411	0.009252	0.00343122	0.00306496	0.00258455	0.00544213
166.56	0.0173738	0.008192	0.014259	0.009524	0.00372484	0.00303235	0.00262775	0.00560399
166.8	0.0173112	0.008468	0.014164	0.009347	0.00377972	0.00289724	0.00245414	0.00545273
167.04	0.0174368	0.008306	0.014251	0.009408	0.00397688	0.00284829	0.00259412	0.00537642
167.28	0.017815	0.008666	0.014279	0.009618	0.00370472	0.00307301	0.0026046	0.00523214
167.52	0.0175247	0.008466	0.014275	0.009638	0.00363436	0.00305428	0.00237447	0.00533973
167.76	0.017471	0.00861	0.013968	0.009118	0.003815	0.00304768	0.0024104	0.00552234
168	0.0176277	0.008571	0.013964	0.009748	0.00353812	0.00308276	0.00301778	0.00529766
168.24	0.0177003	0.00875	0.014252	0.009752	0.00440795	0.00317642	0.0025811	0.00540899
168.48	0.0176976	0.008461	0.014169	0.009679	0.00434074	0.00313726	0.00262287	0.00559075
168.72	0.0179169	0.008528	0.014219	0.009601	0.00387689	0.00285217	0.00276	0.00548297
168.96	0.0175098	0.008484	0.014499	0.009331	0.00395286	0.00320523	0.00290849	0.00544362
169.2	0.0176909	0.008558	0.013899	0.009866	0.00391822	0.00333493	0.00310323	0.00564185
169.44	0.017913	0.008619	0.014007	0.009362	0.00411866	0.00313814	0.00266081	0.00550253
169.68	0.0177862	0.008702	0.014141	0.009294	0.0043423	0.0032141	0.00271431	0.00566803
169.92	0.0179331	0.008444	0.014181	0.009464	0.00450568	0.00313874	0.00299686	0.00600141
170.16	0.0181837	0.008624	0.014342	0.010274	0.00439639	0.00320686	0.00254323	0.00564561
170.4	0.0176317	0.008761	0.014023	0.010126	0.00446378	0.00318507	0.00245714	0.00599771
170.64	0.0176379	0.008743	0.014239	0.010044	0.00415687	0.00300188	0.00305557	0.00579592
170.88	0.0179009	0.008431	0.014147	0.009818	0.0037625	0.0031041	0.00250033	0.00557729
171.12	0.0181601	0.008917	0.014411	0.00989	0.00457637	0.00306253	0.00296983	0.00622477
171.36	0.0178299	0.008794	0.013862	0.009737	0.00427444	0.00354646	0.00267667	0.0058699
171.6	0.0178501	0.008804	0.014221	0.009626	0.00442263	0.00346755	0.00286967	0.00613981
171.84	0.0179743	0.008666	0.013791	0.010047	0.00410807	0.00335242	0.00314054	0.0062103
172.08	0.0180306	0.008619	0.014258	0.009887	0.00430761	0.00360536	0.00303954	0.00579836
172.32	0.0178372	0.008769	0.014479	0.009963	0.00407944	0.00343762	0.00284182	0.00562636
172.56	0.0181189	0.008778	0.014601	0.009745	0.0046461	0.00334923	0.00299175	0.00603167
172.8	0.0178411	0.008778	0.014092	0.009984	0.00442413	0.00307536	0.00323372	0.00635344
173.04	0.0182446	0.008944	0.014401	0.010042	0.00436506	0.00323385	0.00303179	0.00609478
173.28	0.0175848	0.008862	0.013821	0.01004	0.00460406	0.00327265	0.00316906	0.00597075
173.52	0.0179631	0.008822	0.014191	0.009774	0.00465979	0.00328301	0.0030494	0.00606352
173.76	0.0177594	0.008549	0.014195	0.010184	0.00431914	0.0035442	0.00318397	0.00614711
174	0.0178875	0.008775	0.013986	0.01037	0.0048416	0.00372559	0.00300445	0.00621375
174.24	0.0184709	0.008775	0.014149	0.009998	0.00463843	0.00345379	0.00309148	0.00597573
174.48	0.0182816	0.008861	0.014231	0.009868	0.00468172	0.0036523	0.0031589	0.00623901
174.72	0.0177133	0.00878	0.014517	0.010155	0.00464804	0.00396835	0.00322318	0.00657155
174.96	0.0182199	0.009248	0.014134	0.009947	0.00526157	0.0035099	0.00297473	0.00630092
175.2	0.0179163	0.009021	0.013976	0.01055	0.00500122	0.00344178	0.00331311	0.00634382
175.44	0.0177978	0.008501	0.014064	0.009922	0.00527753	0.00366841	0.00314917	0.00604954
175.68	0.0179845	0.009081	0.013699	0.010134	0.00440851	0.00350681	0.00353208	0.00640974
175.92	0.0180681	0.009074	0.013765	0.010565	0.00468418	0.00363087	0.00319908	0.0063673
176.16	0.0180496	0.008704	0.014117	0.010409	0.00503452	0.00391459	0.00309834	0.0065238
176.4	0.0176748	0.00888	0.014313	0.010172	0.00496406	0.0040092	0.00316616	0.00649542
176.64	0.0183541	0.009152	0.014334	0.01038	0.00474707	0.00373334	0.0032973	0.00623008
176.88	0.0180734	0.00904	0.014116	0.010444	0.00449106	0.0034581	0.00326686	0.00674791
177.12	0.0186483	0.008837	0.013909	0.010086	0.00468369	0.00395422	0.00334123	0.00637945
177.36	0.018055	0.009015	0.014166	0.010163	0.00484507	0.00367511	0.00328245	0.00634813
177.6	0.0183778	0.0092	0.014225	0.010501	0.0048959	0.00378882	0.00328978	0.00660243
177.84	0.0179144	0.00894	0.014041	0.010667	0.00507525	0.00370962	0.00335414	0.00691487
178.08	0.0181817	0.009057	0.013949	0.010371	0.00436644	0.00370456	0.00333227	0.00615037
178.32	0.0185792	0.0091	0.014201	0.01042	0.00479161	0.00381188	0.00346507	0.0066066
178.56	0.0180669	0.008779	0.013901	0.010057	0.00481536	0.00389855	0.00334732	0.00620959
178.8	0.0186465	0.009037	0.013721	0.01016	0.00519752	0.0038496	0.00310832	0.00663309
179.04	0.0181267	0.009397	0.013803	0.010774	0.00473988	0.00340267	0.00323831	0.00662625
179.28	0.0178917	0.008869	0.013533	0.010836	0.00471536	0.0038069	0.00344821	0.0066787
179.52	0.0180521	0.00911	0.014261	0.010665	0.00483201	0.00402394	0.00318873	0.00657443
179.76	0.0185462	0.009178	0.013973	0.010447	0.00470487	0.00379088	0.00350437	0.00667855
180	0.0184786	0.008952	0.014159	0.010227	0.00483269	0.00392705	0.00362679	0.00663505
180.24	0.0189221	0.008796	0.013892	0.010517	0.00507719	0.00398891	0.003523	0.00646188
180.48	0.0183285	0.009042	0.013818	0.010354	0.00541429	0.00369359	0.00349747	0.00644455
180.72	0.018051	0.008865	0.014022	0.01067	0.00526292	0.0040214	0.0035088	0.00690796
180.96	0.0182664	0.00881	0.013823	0.010229	0.00487083	0.00384694	0.00394106	0.00705108
181.2	0.01842	0.008891	0.013847	0.010271	0.00553973	0.00373504	0.00341717	0.00661232
181.44	0.0181829	0.009112	0.013867	0.010459	0.00513058	0.00411847	0.00356982	0.00687517
181.68	0.0189094	0.009021	0.013817	0.010388	0.00533139	0.0040412	0.00342994	0.0067111
181.92	0.0185358	0.008757	0.013901	0.010526	0.00536336	0.00392693	0.0032052	0.00686829
182.16	0.0180353	0.008876	0.013823	0.010384	0.00560732	0.00384546	0.00335331	0.00660339
182.4	0.0179712	0.008926	0.014043	0.010671	0.00525186	0.0036384	0.00332521	0.00707025
182.64	0.0183773	0.008873	0.013456	0.010576	0.00519595	0.00395685	0.00354496	0.00681652
182.88	0.018104	0.009201	0.013763	0.010679	0.00537079	0.00422475	0.0037729	0.00694593
183.12	0.0185087	0.008769	0.014137	0.010473	0.00516943	0.00388409	0.00331124	0.00688204
183.36	0.0180145	0.008888	0.013698	0.010377	0.00541574	0.00355584	0.00349923	0.00685791
183.6	0.018496	0.00909	0.01408	0.010637	0.00501358	0.00421458	0.00351075	0.00692522
183.84	0.018616	0.008893	0.013565	0.01044	0.0053652	0.00397143	0.00365313	0.00663086
184.08	0.0184403	0.009116	0.013901	0.011025	0.00523288	0.00376807	0.00347036	0.00689326
184.32	0.0186666	0.009004	0.013819	0.010662	0.00486995	0.0038131	0.00364004	0.0071265
184.56	0.0183282	0.008833	0.013842	0.01045	0.00520244	0.0038312	0.003587	0.00665068
184.8	0.0184862	0.00836	0.013671	0.010787	0.00536566	0.00409916	0.00359277	0.00721539
185.04	0.0183211	0.009163	0.013908	0.010778	0.00524355	0.00419034	0.00349821	0.00743092
185.28	0.0186305	0.008967	0.013579	0.01086	0.0050942	0.00421017	0.00389648	0.00699602
185.52	0.0186856	0.009112	0.013684	0.010774	0.00517601	0.00415387	0.00342151	0.00705906
185.76	0.0182667	0.009129	0.013764	0.010673	0.00541285	0.00411496	0.00353925	0.0068172
186	0.0187173	0.009156	0.013908	0.010447	0.00520124	0.00420591	0.00351588	0.00666328
186.24	0.0184866	0.00914	0.013522	0.010801	0.00529694	0.00390796	0.00319788	0.00709376
186.48	0.0187922	0.009354	0.013748	0.011062	0.00525722	0.0042962	0.00381493	0.00715513
186.72	0.0183611	0.008937	0.013905	0.010386	0.00527889	0.00399519	0.00389791	0.00729955
186.96	0.0186441	0.00947	0.013448	0.010939	0.00514607	0.00390983	0.00364751	0.00729961
187.2	0.0184441	0.008482	0.013541	0.010722	0.00533503	0.00387729	0.0033472	0.00691399
187.44	0.0185064	0.009216	0.013697	0.010966	0.00522903	0.00382771	0.00387817	0.00725311
187.68	0.0187243	0.009203	0.013326	0.010738	0.0053196	0.0042278	0.00348572	0.00716407
187.92	0.0188031	0.00884	0.013675	0.010228	0.00527057	0.00410213	0.003529	0.00685172
188.16	0.018865	0.008914	0.013972	0.010528	0.00583998	0.00407244	0.00355804	0.00691571
188.4	0.0185831	0.008845	0.013702	0.010564	0.00555999	0.00380795	0.00352951	0.00734995
188.64	0.0180855	0.009201	0.013751	0.010784	0.00538467	0.00384799	0.00359555	0.00708715
188.88	0.0185088	0.00887	0.01348	0.010904	0.00517188	0.00415797	0.00355951	0.00708447
189.12	0.0183895	0.008774	0.013523	0.01078	0.00491322	0.00374358	0.00365087	0.00726523
189.36	0.0180718	0.009152	0.013662	0.010697	0.00553561	0.00399622	0.00355895	0.00676004
189.6	0.0185139	0.009012	0.013706	0.010643	0.00586343	0.00410887	0.0037676	0.00712187
189.84	0.0186087	0.009226	0.013689	0.010929	0.00585645	0.00407613	0.0035133	0.00741878
190.08	0.0187009	0.008997	0.013617	0.010455	0.00520582	0.00393719	0.00336813	0.00712768
190.32	0.017905	0.009064	0.013831	0.010975	0.00568917	0.00408918	0.00371489	0.0072342
190.56	0.0178931	0.009297	0.013411	0.010854	0.00503696	0.00421113	0.00368825	0.00751317
190.8	0.0186554	0.009069	0.013765	0.01041	0.00563915	0.0042887	0.00377023	0.0073489
191.04	0.0188405	0.008738	0.014138	0.010917	0.00563268	0.00405655	0.00387441	0.0072961
191.28	0.0185046	0.00913	0.013757	0.010407	0.00599897	0.00419329	0.00389485	0.00728238
191.52	0.0187609	0.009175	0.013757	0.010748	0.00581571	0.004278	0.00375243	0.00722675
191.76	0.0179923	0.008729	0.013952	0.010724	0.0055959	0.00433325	0.00386129	0.00710369
192	0.0185762	0.008747	0.013963	0.010757	0.00582568	0.00412547	0.00364044	0.00721095
192.24	0.0184087	0.008896	0.013527	0.010853	0.00546044	0.00410302	0.0034644	0.00743155
192.48	0.0183605	0.008997	0.013832	0.01106	0.00551985	0.00431396	0.00390663	0.0073778
192.72	0.0186698	0.009119	0.013812	0.010995	0.00545006	0.00407568	0.00393422	0.00737842
192.96	0.0184857	0.009039	0.013596	0.010895	0.00549157	0.00420245	0.0038595	0.00712192
193.2	0.0181361	0.008971	0.013637	0.011103	0.00577586	0.00393486	0.00387171	0.00730658
193.44	0.0188533	0.009057	0.01364	0.01063	0.00571086	0.00433569	0.00325167	0.00737251
193.68	0.0187851	0.008661	0.013441	0.010578	0.00579078	0.00419344	0.0037331	0.00710908
193.92	0.0182816	0.009028	0.013462	0.011129	0.00563518	0.0045186	0.00381617	0.00726515
194.16	0.0189293	0.008705	0.013595	0.010887	0.0056176	0.00415708	0.00375172	0.00720971
194.4	0.0188334	0.008848	0.013581	0.010589	0.0055127	0.00403396	0.00381567	0.00751126
194.64	0.018813	0.009008	0.013763	0.010805	0.005816	0.00430565	0.00407692	0.00734832
194.88	0.0188574	0.009175	0.013774	0.010552	0.00557007	0.0042956	0.00373224	0.00708123
195.12	0.0183989	0.008849	0.013746	0.010927	0.00581031	0.00445501	0.0039358	0.00774517
195.36	0.0187221	0.00876	0.013822	0.010677	0.00606526	0.00456004	0.00363141	0.00701981
195.6	0.0186123	0.009099	0.013616	0.01049	0.0057139	0.00437125	0.00356571	0.00742835
195.84	0.0186015	0.008825	0.01363	0.011058	0.00576973	0.00405267	0.00409446	0.00719871
196.08	0.0184136	0.009231	0.013528	0.0111	0.00531495	0.00416558	0.00388127	0.00716659
196.32	0.0186979	0.008712	0.013706	0.011023	0.00542955	0.00440137	0.00390732	0.00728701
196.56	0.0188405	0.009	0.01359	0.011084	0.00550603	0.00424974	0.00372717	0.00727564
196.8	0.0187464	0.008936	0.013769	0.011053	0.00529361	0.00429004	0.00409112	0.00737828
197.04	0.0183976	0.009184	0.013546	0.010905	0.00560427	0.00422157	0.00390973	0.00741156
197.28	0.0186816	0.00909	0.013334	0.011138	0.00597403	0.00428548	0.00374331	0.00719605
197.52	0.0186274	0.008904	0.013652	0.010981	0.00582797	0.00422145	0.00395043	0.00730567
197.76	0.0185123	0.009063	0.013653	0.010686	0.00617114	0.00411404	0.00367021	0.00768464
198	0.0184853	0.009101	0.013305	0.011031	0.00610321	0.00433055	0.0036701	0.00765031
198.24	0.0187141	0.008486	0.013148	0.010935	0.00611212	0.00377669	0.00396933	0.00728584
198.48	0.0189408	0.009024	0.013704	0.011139	0.00573696	0.00425338	0.00408555	0.00732453
198.72	0.0187877	0.009104	0.013128	0.010728	0.00561917	0.00411364	0.00380324	0.0072086
198.96	0.0186474	0.008989	0.01379	0.010494	0.00548916	0.00393565	0.00413422	0.00712498
199.2	0.0187685	0.008954	0.01359	0.011012	0.00603452	0.00433928	0.00391829	0.00754509
199.44	0.0191451	0.0089	0.013579	0.01051	0.00554709	0.00429102	0.00404552	0.00741259
199.68	0.0190746	0.008888	0.01339	0.010982	0.00595303	0.00407519	0.00429303	0.00753343
199.92	0.01872	0.00873	0.013634	0.010723	0.00607378	0.00454333	0.00405511	0.00782909
200.16	0.0184777	0.008911	0.013667	0.01106	0.00613361	0.00426914	0.00386441	0.00788203
200.4	0.0185103	0.009131	0.013221	0.011749	0.00609481	0.00393999	0.00431922	0.00783626
200.64	0.0188236	0.009089	0.013396	0.010336	0.00568093	0.0041282	0.00393447	0.00765466
200.88	0.0186648	0.008697	0.013197	0.01093	0.00578173	0.00430589	0.00408577	0.00765575
201.12	0.0187478	0.008934	0.013431	0.011437	0.00605971	0.00442459	0.00399303	0.00749317
201.36	0.0188496	0.009013	0.01337	0.010807	0.00571664	0.00422764	0.0042635	0.00791522
201.6	0.0188586	0.00923	0.013206	0.010576	0.00627583	0.0045485	0.00395868	0.00745046
201.84	0.0188002	0.008735	0.013294	0.011106	0.00588945	0.00441157	0.00380885	0.00755247
202.08	0.0184964	0.008951	0.013714	0.010747	0.00580272	0.00406736	0.00435458	0.0077001
202.32	0.019003	0.009218	0.013135	0.010874	0.00585498	0.00420505	0.00410689	0.00769909
202.56	0.0185411	0.008785	0.013288	0.010471	0.00565309	0.00475071	0.00442635	0.00771477
202.8	0.0185625	0.008876	0.013507	0.010649	0.00567461	0.00432534	0.00381478	0.00795499
203.04	0.0183767	0.008952	0.013315	0.010613	0.00603015	0.00446276	0.00406065	0.00741243
203.28	0.0186944	0.008819	0.013407	0.010679	0.00585531	0.00444551	0.00436241	0.00773265
203.52	0.0183353	0.009024	0.013281	0.011333	0.00577477	0.00419438	0.00399841	0.00782158
203.76	0.01876	0.009015	0.013632	0.011071	0.00637352	0.00398037	0.00403439	0.00799907
204	0.0188663	0.00913	0.013472	0.011073	0.00596098	0.00414554	0.00428525	0.00767833
204.24	0.0187428	0.009179	0.013529	0.010558	0.00618589	0.00418109	0.00386084	0.00777553
204.48	0.0189902	0.008936	0.013356	0.01119	0.00601526	0.00430272	0.00398078	0.00751403
204.72	0.0188041	0.008924	0.013702	0.010968	0.0061422	0.00434603	0.00410886	0.00784141
204.96	0.0184144	0.009079	0.013314	0.010737	0.00597771	0.00462159	0.0035302	0.00754795
205.2	0.0192311	0.008729	0.012928	0.011049	0.00630139	0.00422604	0.00392735	0.00801934
205.44	0.0189153	0.009242	0.013238	0.011052	0.00575675	0.0043316	0.00420909	0.00778782
205.68	0.0192969	0.008806	0.013292	0.010323	0.00581447	0.00437481	0.00375555	0.00814417
205.92	0.0186096	0.008764	0.013545	0.010647	0.0060098	0.00425763	0.00440327	0.00760838
206.16	0.0186124	0.009238	0.013018	0.010306	0.00635772	0.00430023	0.00390386	0.0072399
206.4	0.0184525	0.009135	0.013328	0.010965	0.00609864	0.00454339	0.00404219	0.00742186
206.64	0.0184744	0.008674	0.013501	0.010866	0.00575546	0.00437765	0.00402022	0.0076929
206.88	0.0186614	0.008751	0.013493	0.010595	0.00602725	0.00445078	0.00430923	0.00784419
207.12	0.0185434	0.008883	0.013556	0.010911	0.00615437	0.00427921	0.00358868	0.00765629
207.36	0.018731	0.008482	0.01352	0.01075	0.00595074	0.00418056	0.00384601	0.00778634
207.6	0.0189377	0.008775	0.013148	0.01086	0.00582315	0.00399714	0.00410524	0.00771806
207.84	0.0187177	0.008619	0.013218	0.010537	0.00593859	0.00424308	0.00454587	0.00803779
208.08	0.0181846	0.009191	0.013348	0.01079	0.0056025	0.00407418	0.004228	0.00760442
208.32	0.0187785	0.008953	0.013065	0.011075	0.00615623	0.00427157	0.00461879	0.00785226
208.56	0.0187236	0.009005	0.013201	0.010648	0.00577803	0.00420175	0.00396966	0.00771264
208.8	0.0188307	0.009084	0.013531	0.01064	0.00618412	0.00410948	0.00428065	0.00757276
209.04	0.0184284	0.008912	0.013252	0.011076	0.00625582	0.0045126	0.00394988	0.00767208
209.28	0.0186097	0.009041	0.013393	0.010605	0.00552312	0.00430762	0.00437654	0.00773019
209.52	0.0186802	0.009235	0.013234	0.010573	0.00624125	0.00432507	0.0038764	0.00787129
209.76	0.0187804	0.008683	0.012805	0.010965	0.00606144	0.00425735	0.00421402	0.00844829
210	0.0184734	0.008946	0.013393	0.01101	0.00626992	0.00425173	0.00384657	0.00785717
210.24	0.0190589	0.008921	0.01314	0.011089	0.00582954	0.00443116	0.00415506	0.00737286
210.48	0.0183824	0.009046	0.013063	0.010482	0.00623312	0.00420499	0.00423602	0.00770447
210.72	0.0185453	0.008848	0.01294	0.011042	0.00606977	0.00436795	0.00425844	0.0077837
210.96	0.0182328	0.00895	0.013192	0.010945	0.00580996	0.00427964	0.00393206	0.00801612
211.2	0.0186078	0.00891	0.013369	0.010773	0.00605418	0.0042492	0.00421589	0.00759396
211.44	0.0183235	0.009156	0.013635	0.010924	0.00594494	0.00414816	0.00436338	0.0078417
211.68	0.0190369	0.009166	0.013297	0.010899	0.00590842	0.0042234	0.00408615	0.00759827
211.92	0.0188533	0.009216	0.013407	0.010348	0.00572488	0.00481167	0.00433747	0.00761438
212.16	0.018977	0.009034	0.013294	0.011057	0.00608698	0.00439418	0.00419124	0.00805414
212.4	0.0188799	0.008471	0.013111	0.011214	0.00602855	0.0043285	0.00397158	0.00818303
212.64	0.0188621	0.009017	0.013359	0.010916	0.0059037	0.00436857	0.00405098	0.00828703
212.88	0.0189613	0.008499	0.013202	0.01081	0.00635581	0.00436007	0.00440541	0.00744098
213.12	0.0184578	0.009158	0.013676	0.010716	0.00627824	0.00455663	0.00427855	0.00771216
213.36	0.0186293	0.009221	0.013419	0.010556	0.0066794	0.00417667	0.00402283	0.00766543
213.6	0.0190238	0.00912	0.013292	0.010684	0.00601653	0.00429366	0.00434024	0.00777718
213.84	0.0189883	0.009016	0.013376	0.010809	0.00621233	0.00437575	0.0047118	0.00762069
214.08	0.0189729	0.00869	0.013349	0.010622	0.00623235	0.00408419	0.00421296	0.00813429
214.32	0.019221	0.008515	0.013158	0.010648	0.00576724	0.00432737	0.00435956	0.00775715
214.56	0.0188181	0.009119	0.013403	0.010925	0.00621436	0.00422765	0.00408661	0.00776886
214.8	0.0189331	0.008653	0.013231	0.010249	0.00579104	0.00451109	0.0044113	0.00788786
215.04	0.0184744	0.008834	0.013353	0.010528	0.00643224	0.00421735	0.00390031	0.00746009
215.28	0.0187308	0.008869	0.012882	0.011055	0.00620538	0.00437659	0.00412705	0.00758497
215.52	0.0187453	0.008836	0.013182	0.010791	0.00602531	0.0042492	0.00417584	0.00800627
215.76	0.0187483	0.008735	0.013306	0.010885	0.00620484	0.00463032	0.00408239	0.0081947
216	0.0187683	0.00875	0.013232	0.010879	0.00627977	0.00428711	0.0042923	0.00795504
216.24	0.0191525	0.008656	0.01317	0.010895	0.0061167	0.00416718	0.00400441	0.00772823
216.48	0.0190703	0.00835	0.013224	0.010661	0.00565024	0.00458267	0.00425677	0.00806096
216.72	0.0187439	0.008587	0.012635	0.010817	0.00616298	0.00435364	0.00445646	0.00787742
216.96	0.0191968	0.008901	0.013147	0.011123	0.00640463	0.00447107	0.00413014	0.00772428
217.2	0.0187024	0.008832	0.013326	0.010902	0.00615614	0.00450495	0.00440722	0.00829499
217.44	0.019193	0.008741	0.013224	0.010827	0.0061283	0.00426266	0.00418001	0.00776583
217.68	0.0186641	0.008928	0.013119	0.010589	0.00609954	0.00442001	0.00419041	0.00770486
217.92	0.01867	0.008891	0.013191	0.011266	0.00628063	0.00459266	0.004182	0.00780031
218.16	0.0188738	0.008606	0.013485	0.010504	0.00629679	0.0042886	0.00434796	0.00814184
218.4	0.018894	0.00877	0.013205	0.011036	0.00614143	0.00426196	0.00428393	0.00765418
218.64	0.0186568	0.008544	0.013113	0.01097	0.0056197	0.00435548	0.00403632	0.00748059
218.88	0.0185904	0.008624	0.013251	0.011061	0.00629766	0.00437775	0.00436599	0.00814306
219.12	0.0189499	0.00876	0.012975	0.010847	0.00588897	0.00448927	0.00433322	0.00770548
219.36	0.0187456	0.009011	0.013395	0.011129	0.00623288	0.00441226	0.00413509	0.00770288
219.6	0.0189617	0.008853	0.01307	0.01057	0.00586653	0.00428772	0.00437401	0.00766533
219.84	0.0187317	0.008681	0.012722	0.011085	0.00608915	0.00416318	0.00403713	0.00785295
220.08	0.0190317	0.00886	0.013189	0.011228	0.00621045	0.00429626	0.00406932	0.00810086
220.32	0.0190605	0.008548	0.013087	0.010961	0.0060929	0.00399057	0.00412166	0.00812407
220.56	0.0187438	0.008371	0.013209	0.010452	0.00628672	0.00446565	0.00454749	0.00759488
220.8	0.0185494	0.009106	0.013142	0.010778	0.00596731	0.00462052	0.00418189	0.00770552
221.04	0.0187181	0.008678	0.01295	0.010664	0.00590754	0.00433117	0.00433317	0.00800599
221.28	0.0188213	0.008939	0.013399	0.01033	0.00633564	0.00419261	0.00428114	0.0079147
221.52	0.0189913	0.008583	0.013392	0.010702	0.00654216	0.00446921	0.00409639	0.00818668
221.76	0.0190753	0.008625	0.013117	0.010657	0.006369	0.00421387	0.00380546	0.00800407
222	0.0187712	0.008725	0.013224	0.010861	0.00620543	0.00452428	0.00428339	0.00745914
222.24	0.0189663	0.008524	0.013112	0.010842	0.00630772	0.00439907	0.00407803	0.00804684
222.48	0.0189899	0.008599	0.013017	0.010867	0.00642881	0.00439616	0.00443133	0.00807598
222.72	0.0189098	0.008694	0.013144	0.010549	0.00625452	0.00415392	0.00450063	0.00822509
222.96	0.0189523	0.008711	0.012791	0.010704	0.00622061	0.00432149	0.00421045	0.00782593
223.2	0.0188613	0.008645	0.013074	0.010575	0.00650831	0.00443216	0.00439606	0.00841444
223.44	0.0189284	0.008823	0.012762	0.011362	0.00609263	0.00430054	0.00433208	0.00817225
223.68	0.018419	0.00887	0.013362	0.010703	0.00594949	0.00431782	0.00439369	0.00756491
223.92	0.019026	0.008556	0.012766	0.011214	0.00599199	0.00425498	0.00431295	0.00831247
224.16	0.0191171	0.008787	0.013094	0.010767	0.00655629	0.00439705	0.00387635	0.00786562
224.4	0.0190154	0.008617	0.013006	0.010735	0.00661434	0.00449085	0.00419389	0.00799149
224.64	0.0189174	0.008777	0.012926	0.010829	0.00615974	0.00456771	0.00438718	0.00804266
224.88	0.0189316	0.008669	0.01291	0.011289	0.00599899	0.00418984	0.00464609	0.00777549
225.12	0.0190264	0.00874	0.013063	0.010541	0.00567348	0.00431586	0.00466472	0.00811027
225.36	0.0189202	0.008541	0.013066	0.010833	0.00611433	0.00429789	0.00442122	0.00824593
225.6	0.0188582	0.008724	0.01298	0.011044	0.00577545	0.00453575	0.00473102	0.00782928
225.84	0.0188663	0.008535	0.012852	0.010422	0.00624092	0.00418694	0.00430376	0.00805664
226.08	0.0187031	0.008977	0.01279	0.010923	0.00690992	0.0043116	0.00395547	0.00813121
226.32	0.0186459	0.008812	0.012815	0.010699	0.00607012	0.00413083	0.00437351	0.00788628
226.56	0.019034	0.008282	0.013062	0.011161	0.00611977	0.00438208	0.00437498	0.00807217
226.8	0.0191117	0.008563	0.012881	0.010827	0.0063027	0.00429662	0.00429946	0.00816691
227.04	0.018807	0.008737	0.013314	0.01087	0.00692016	0.00432375	0.00418391	0.00795715
227.28	0.0189048	0.008933	0.013319	0.01081	0.00609392	0.00443098	0.00449162	0.00805848
227.52	0.0190226	0.008617	0.013112	0.011208	0.00571234	0.00417562	0.00453044	0.00816677
227.76	0.0186898	0.008685	0.013078	0.010707	0.00649752	0.00422159	0.00433752	0.00773568
228	0.0190305	0.008647	0.013004	0.01031	0.00622784	0.00432934	0.00429433	0.00806071
228.24	0.0188707	0.008549	0.012723	0.010766	0.00614545	0.00454549	0.00436506	0.00824727
228.48	0.0187529	0.008299	0.012824	0.010619	0.00627148	0.00419406	0.00444797	0.00801654
228.72	0.0189125	0.008881	0.01313	0.010826	0.00618424	0.00441202	0.00447588	0.00813805
228.96	0.01873	0.008313	0.013003	0.010809	0.00603855	0.00463288	0.00478436	0.00833504
229.2	0.0187995	0.0084	0.013062	0.010894	0.00591827	0.00444764	0.00444987	0.00831982
229.44	0.0188384	0.008772	0.012837	0.010767	0.00628606	0.00466689	0.00434585	0.00842408
229.68	0.018857	0.008503	0.012852	0.010583	0.00638959	0.00428378	0.00457814	0.00826791
229.92	0.0185609	0.008701	0.01317	0.010446	0.00663852	0.00438092	0.00431282	0.00828223
230.16	0.018787	0.008722	0.012874	0.010922	0.00663429	0.00423028	0.00447991	0.00805399
230.4	0.0191939	0.008512	0.013355	0.010496	0.00666388	0.00477126	0.00449809	0.00823595
230.64	0.0188218	0.008461	0.013169	0.010669	0.0065349	0.00431167	0.00446955	0.00822416
230.88	0.0188877	0.008682	0.012759	0.011256	0.00652888	0.00420631	0.00409666	0.0080003
231.12	0.0188011	0.00883	0.012917	0.010767	0.00616408	0.00418041	0.00432646	0.00806732
231.36	0.0193333	0.008501	0.013141	0.010932	0.00607569	0.00430295	0.00410886	0.00839387
231.6	0.0192282	0.008289	0.012938	0.010618	0.00588009	0.00438453	0.00429986	0.00780995
231.84	0.018475	0.008778	0.012754	0.010552	0.00631325	0.00443953	0.0042767	0.00813162
232.08	0.0185306	0.008422	0.012898	0.01058	0.00631596	0.00466356	0.00410271	0.00797126
232.32	0.0184855	0.008643	0.012885	0.010617	0.00615008	0.00441105	0.00448664	0.00841488
232.56	0.0191795	0.008545	0.013104	0.010758	0.00648324	0.00416607	0.00463097	0.00780714
232.8	0.0188471	0.008554	0.01295	0.010569	0.00622336	0.00427749	0.0045415	0.0085071
233.04	0.0189586	0.008455	0.012889	0.010741	0.0061819	0.00432321	0.00449262	0.00798998
233.28	0.0189812	0.008407	0.012776	0.010823	0.00644635	0.00438475	0.00442146	0.00792025
233.52	0.0187867	0.008552	0.012962	0.010214	0.00616898	0.00409938	0.00446111	0.00822912
233.76	0.0190797	0.008396	0.012922	0.01076	0.00648734	0.00414496	0.00453701	0.00822325
234	0.0187471	0.008614	0.012886	0.010502	0.00634057	0.00431034	0.00465578	0.00842429
234.24	0.0189583	0.008634	0.013006	0.010627	0.00635327	0.00466688	0.00425811	0.00802112
234.48	0.0192042	0.008486	0.013197	0.010466	0.00657672	0.00433344	0.0045966	0.00778408
234.72	0.0182024	0.008534	0.012748	0.010985	0.00622394	0.00407327	0.00457911	0.00804296
234.96	0.0188904	0.008205	0.012981	0.010471	0.00606281	0.00443231	0.00447703	0.00825518
235.2	0.0189255	0.008665	0.012647	0.01021	0.00632848	0.00427173	0.00442486	0.00761582
235.44	0.0190874	0.008446	0.012644	0.010935	0.0060401	0.00438949	0.00458438	0.0078744
235.68	0.0193387	0.008517	0.012703	0.010467	0.00673167	0.00406997	0.00471578	0.00825212
235.92	0.0189335	0.008236	0.01312	0.010388	0.00624928	0.00411392	0.0045171	0.00832041
236.16	0.0187016	0.008581	0.012801	0.010246	0.00602642	0.0046148	0.00460387	0.00797476
236.4	0.0191204	0.008182	0.012901	0.010993	0.00673047	0.00416601	0.00440103	0.00813716
236.64	0.0188841	0.008484	0.012981	0.010722	0.00641971	0.00454104	0.00417582	0.00830205
236.88	0.0188384	0.007945	0.012829	0.01052	0.00649671	0.00431281	0.00457422	0.00817071
237.12	0.0187915	0.008562	0.01309	0.010668	0.0060686	0.00431423	0.00427009	0.0080012
237.36	0.0188685	0.008432	0.013111	0.0109	0.00609877	0.00424661	0.00454094	0.00824018
237.6	0.0191958	0.008268	0.013001	0.010988	0.00625222	0.00452457	0.00465408	0.00800326
237.84	0.0184724	0.008515	0.013045	0.010413	0.00633297	0.00419805	0.00472783	0.00814724
238.08	0.0187318	0.008456	0.012775	0.010659	0.00678677	0.00395184	0.0046201	0.00809694
238.32	0.0184474	0.008358	0.012985	0.011166	0.00639093	0.00432434	0.00466824	0.00817896
238.56	0.01904	0.008421	0.012837	0.010068	0.0064775	0.0043923	0.00459018	0.00777991
238.8	0.0188145	0.008536	0.012674	0.010875	0.00652482	0.00447745	0.00461833	0.00813147
239.04	0.0185947	0.008351	0.012775	0.011185	0.0067492	0.00401539	0.00459721	0.00789692
239.28	0.0191011	0.008476	0.012764	0.010651	0.00667282	0.00413084	0.00446149	0.00785588
239.52	0.018719	0.008495	0.01285	0.010381	0.0059759	0.00432202	0.00421631	0.00806357
239.76	0.0187562	0.008586	0.012761	0.010819	0.00604741	0.00431264	0.0039867	0.00781749

## Sheet: GIV
	minus PTX				plus PTX
Time	Exp1	Exp2	Exp3	Exp4	Exp1	Exp2	Exp3	Exp4
0	0.000194915	0.000161237	-5.69963e-05	-0.000139628	0.000289	9.53e-05	3.72e-05	0.000168
0.24	-0.000170758	0.000313844	0.000184071	0.000232383	0.000432	-1e-05	-2.1e-06	9.04e-05
0.48	0.000458208	0.000252619	7.62303e-05	0.000351247	0.000103	-1.9e-05	-0.00012	0.000255
0.72	3.40934e-05	-8.02973e-06	-0.000181305	0.000299671	-0.00022	0.000201	-2.4e-05	-0.00013
0.96	6.78523e-05	0.000254546	-1.30565e-05	-9.15127e-05	-0.00046	-8.4e-06	5.53e-05	-9e-06
1.2	-9.53789e-05	0.000260759	0.000176121	-0.000185538	6.13e-05	-7.5e-05	0.000264	8.25e-05
1.44	0.000222064	4.11639e-06	-4.15371e-05	-0.00015647	0.000564	0.000144	0.000429	6.2e-05
1.68	0.000153298	7.24566e-05	0.00023081	8.59112e-05	0.000211	0.00026	0.000227	5.97e-05
1.92	1.72352e-05	0.000258151	0.00024453	0.00021257	0.000307	8.77e-05	-4.6e-05	0.000504
2.16	7.42789e-05	0.000356032	-0.000108229	0.000495756	6.02e-05	2.98e-05	0.000136	0.000315
2.4	0.000361179	0.000138721	0.00029754	-2.82039e-05	0.000311	-0.00038	6.91e-05	-3.5e-05
2.64	0.00023814	0.000114556	-8.42461e-05	0.00026923	-0.00013	0.000249	-7e-05	0.000372
2.88	0.000569894	0.000326254	-3.86639e-06	0.00042766	0.000378	-0.00011	0.000296	0.000311
3.12	0.000114084	1.56074e-05	0.000147398	0.000138238	9.96e-05	0.000264	-0.00019	0.00055
3.36	4.6911e-05	-0.00011172	-0.000107093	0.00048443	-2.3e-05	0.000112	-4.4e-05	6.87e-05
3.6	4.82839e-05	0.000254979	0.000317118	0.000255051	0.000321	2.32e-05	-0.0001	0.000432
3.84	8.03818e-07	0.000252235	0.000396862	0.000276721	0.000134	0.00016	0.000106	6.16e-05
4.08	0.00058022	0.0002181	7.69858e-05	0.000123997	-0.00015	-1.8e-05	0.000356	0.000489
4.32	0.000255654	3.49113e-05	8.11486e-05	-0.000120788	-0.0003	0.000106	0.000111	0.000103
4.56	-3.25444e-05	-4.05815e-05	0.000176284	0.000379198	0.000218	-2.4e-05	-0.00019	0.000363
4.8	3.54598e-06	0.000196049	0.000312688	0.000482505	-0.0002	8.85e-05	-0.00016	-4.9e-05
5.04	-0.000103423	-0.000302832	-0.00016209	0.00016788	5.84e-06	-0.00015	-4.8e-05	-4.3e-05
5.28	2.81995e-05	-2.24584e-05	-0.000149392	9.31517e-05	0.000132	-0.00012	8.33e-05	-0.00011
5.52	9.04645e-05	0.000371283	-0.000312969	3.53286e-06	2.74e-05	-6.9e-05	0.000351	1.17e-05
5.76	0.000240439	3.53784e-05	0.000196623	0.000377117	0.000277	0.000246	0.000413	0.000198
6	1.7158e-06	8.86815e-05	9.94472e-05	0.000223438	1.4e-05	0.000104	-0.00011	0.000159
6.24	-6.09204e-05	-2.12647e-05	0.00024701	2.46112e-05	-3.9e-05	-4.2e-05	-0.00012	-8.7e-05
6.48	-5.35861e-05	0.000371092	0.000156417	0.000200472	0.000197	0.000143	0.000431	2.33e-06
6.72	0.000379313	-0.000264689	6.00664e-05	1.61369e-05	-1.2e-05	0.000251	0.000195	7.33e-05
6.96	0.000170712	6.37007e-05	8.49322e-05	-0.000332407	0.000356	0.00019	3.63e-05	6.74e-05
7.2	8.26771e-05	0.000189123	0.000252352	5.64971e-05	0.0002	0.000198	-1.2e-05	0.000204
7.44	0.000195433	-2.00638e-05	2.46301e-05	-0.000130032	-1.5e-05	0.000146	0.000223	0.000282
7.68	-0.000507378	0.000258255	-8.43384e-05	0.000300231	-0.00034	3.18e-05	0.000138	6.01e-07
7.92	0.000258465	0.00016832	-4.3292e-05	-5.93249e-05	0.000163	4.52e-05	4.71e-05	0.000171
8.16	-0.000107717	0.000317607	-6.0258e-05	-1.25361e-05	-7.1e-05	0.000258	6.17e-05	-0.0002
8.4	-0.000249654	0.000335942	1.77461e-05	0.000214113	0.00025	0.000155	4.94e-06	-0.00032
8.64	4.93928e-05	0.000298155	-0.000221389	-7.9425e-05	0.000123	2.64e-05	0.000137	-7.4e-05
8.88	-4.2245e-05	0.000218851	0.0002321	0.000254126	-0.00027	2.06e-05	3.94e-05	0.000143
9.12	-0.000122735	5.98502e-05	-9.46664e-05	0.000306206	-0.00017	6.78e-05	-1.8e-05	-6.1e-05
9.36	0.000287977	0.000373535	0.000120658	0.000260253	0.000204	0.000191	-6.4e-05	1.64e-05
9.6	0.000288506	0.000220586	1.37604e-05	0.000174378	-8.5e-05	0.000163	-7.6e-05	4.07e-05
9.84	-7.34846e-05	0.000114582	-0.000165065	-2.28551e-05	-3.1e-05	-9.8e-05	0.000343	-5.6e-05
10.08	1.96054e-05	0.0001254	0.000229687	-0.000132564	-0.00012	-0.0001	-4.8e-05	0.000467
10.32	-0.000172448	3.29024e-05	0.000180004	-0.000161062	0.00035	-1.2e-05	5.75e-05	7.53e-05
10.56	0.000539408	-7.01497e-05	-1.59843e-05	-0.000319344	0.000111	-0.00011	1.15e-06	0.000193
10.8	-8.3776e-06	0.000305611	6.81664e-05	-0.00032176	0.00036	-0.00021	-0.00019	0.000214
11.04	-0.000517027	-0.000124375	-7.0995e-05	0.00011447	-0.00018	-2.7e-05	-0.00029	0.000154
11.28	-2.25843e-05	9.37881e-05	0.000352876	0.00023684	-0.00012	0.000218	0.000182	-0.0002
11.52	0.000109512	-0.000232135	7.22544e-05	0.000326017	-0.00011	1.86e-05	0.000413	2.42e-05
11.76	0.00015673	4.39654e-05	-5.33612e-06	8.87346e-05	-0.00035	0.000148	0.000209	-0.00034
12	5.77212e-05	-0.00011174	-0.000245894	0.000110836	-0.00012	-0.00025	-0.00016	-9.8e-05
12.24	6.96115e-05	-9.49928e-05	0.000183504	2.25829e-05	3.57e-05	0.000187	-1.6e-05	0.000214
12.48	0.000178894	-8.65896e-06	-0.000206111	-0.000232203	5.4e-05	-6.3e-05	-0.00012	-0.00012
12.72	7.2848e-05	-6.36961e-06	3.57543e-06	-7.51054e-05	0.000166	0.000101	-0.00028	4.3e-05
12.96	6.18513e-05	0.000165116	2.40945e-05	-0.000169653	8.5e-06	-1.1e-05	0.000124	4.21e-05
13.2	0.000150516	0.000180791	0.000268117	0.000179729	0.000148	0.000275	-0.00021	0.000221
13.44	2.83596e-05	-0.000155773	8.03852e-05	-7.99723e-05	-0.00011	2.01e-05	-0.00011	-0.00012
13.68	7.51776e-05	0.000129948	5.69818e-05	-0.000245971	0.000308	-0.00016	2.59e-05	0.000363
13.92	-3.17922e-05	0.000149504	0.000131323	-0.000309407	8.46e-05	-5.9e-05	-0.00018	6.43e-05
14.16	0.000133096	0.000194727	-0.000270274	4.21568e-05	-0.00016	7.75e-05	0.000109	0.000355
14.4	-0.000187915	-1.71769e-05	-0.000216321	3.70688e-05	0.000227	-0.00013	-4.2e-05	0.000365
14.64	0.000263305	0.00027475	-4.47836e-05	-0.000241433	-0.00032	-0.00018	0.000465	0.000159
14.88	1.09007e-05	-0.000216139	-0.000229391	8.50264e-05	0.000312	0.000204	2.21e-05	-0.00027
15.12	7.68237e-06	-1.69437e-05	-4.6615e-05	0.000242908	-0.00015	1.35e-05	-1.6e-05	-0.00025
15.36	7.43722e-05	0.000105876	0.000175398	0.000246155	1.22e-05	-0.00011	0.000133	-0.00028
15.6	-0.000276894	3.86209e-05	-0.000203375	-0.000124866	7.23e-06	-0.00015	1.77e-05	3.89e-05
15.84	0.000120267	0.000108787	0.000203571	4.97486e-05	-0.00023	0.000143	-0.00016	-0.00029
16.08	5.87432e-05	-5.45275e-05	0.000153856	2.30511e-05	6.06e-05	0.000129	3.59e-05	-0.00012
16.32	2.01106e-05	-7.59257e-06	0.000153974	0.00023321	5.75e-05	-4.6e-05	0.000122	-0.00011
16.56	-0.000272601	0.000158741	5.88107e-05	-6.02629e-05	2.16e-05	-1e-05	-0.00021	0.000112
16.8	3.0674e-05	-0.000171675	0.000260554	9.65533e-05	-0.0001	-0.00021	-1.2e-05	0.00011
17.04	-0.00024342	-0.00021992	-0.000279343	-0.000825927	-1.6e-05	0.000114	0.000146	0.00023
17.28	-0.000402537	-0.000117013	0.000212782	-0.000150826	0.000139	-2.9e-05	2.5e-05	-0.00039
17.52	-0.000326015	-0.000289785	1.088e-05	3.18142e-05	0.000348	0.000229	7.4e-05	0.000122
17.76	-0.00024896	-0.000115249	1.05338e-05	0.000316345	-3.8e-05	6.07e-05	0.000124	0.000221
18	0.000377746	-0.000115122	0.000122862	-0.000289612	-0.00038	5.63e-05	5.69e-05	-2.8e-05
18.24	9.51631e-05	-0.000278339	3.06465e-05	0.000117124	-0.00012	9.82e-05	-0.0003	0.000134
18.48	-0.000107721	0.000259669	0.000106561	0.000181356	-0.00023	-3.5e-05	-8.5e-05	-7.2e-05
18.72	-0.000306734	2.61316e-05	-5.08109e-05	-6.93052e-07	7.28e-05	-4.2e-05	-0.00011	-0.00026
18.96	0.000251756	0.000100875	0.000114417	0.000243136	0.000249	0.000107	-0.00019	-6.9e-05
19.2	-0.000102335	3.30179e-05	-8.99328e-05	2.97441e-05	-0.00029	-0.00031	-0.00018	0.000175
19.44	-4.71145e-05	-2.21787e-05	2.51506e-05	-8.51974e-05	0.000228	6.1e-05	-0.00018	7.02e-05
19.68	-1.21189e-05	7.80345e-06	-6.7745e-05	0.000186018	0.000308	4.7e-05	-9.7e-05	-9.2e-05
19.92	-0.000130447	-7.9346e-05	-1.25384e-07	0.000176992	6.65e-05	9.55e-06	-0.00019	-0.00039
20.16	5.8526e-06	-0.00018471	-0.000336949	-3.98588e-05	-2e-05	9.52e-05	-3.5e-05	1.39e-05
20.4	0.000100861	4.43579e-05	1.43171e-05	-0.000192181	-0.00031	-7.7e-05	4.39e-05	-6.1e-05
20.64	-0.000292039	-0.000416613	-0.000228608	1.33738e-05	0.000205	-9.8e-05	-4e-05	3.22e-05
20.88	-0.000216373	-8.52648e-05	-0.000324384	-0.000208709	-4.4e-05	7.67e-05	9.9e-05	0.00036
21.12	-0.000220054	-0.000441929	-7.24797e-06	9.97275e-05	3.16e-05	0.000186	0.000255	-0.00011
21.36	-0.000331442	-0.000260418	-0.00026546	0.000213822	4.37e-05	-8.6e-05	-0.00016	-0.00014
21.6	0.000316564	0.000240529	-0.000141431	-0.000117526	-0.00014	4.77e-05	-0.00014	-0.0001
21.84	-0.000338675	-0.000174209	0.000290357	-0.00029584	-9.3e-05	0.000183	-0.00014	-0.00013
22.08	-8.2639e-05	-1.92646e-06	-0.000128129	5.47035e-05	-3.6e-05	-0.00017	2.44e-05	-8.5e-05
22.32	-0.000417027	-0.000144929	5.1073e-05	7.89112e-05	-0.00014	4.04e-05	0.000131	-1.1e-06
22.56	-0.000488042	-8.30351e-05	2.41705e-05	1.0601e-05	-0.0001	-8e-05	0.000226	-0.00022
22.8	-9.37689e-05	-0.00011163	-0.000239319	-7.04697e-05	-0.00025	-0.00028	0.000339	-0.00011
23.04	0.000238446	-0.000136942	-9.01448e-05	-0.000434126	-4e-05	-0.00027	-0.00019	-1.3e-05
23.28	-7.9964e-05	1.3053e-05	-0.000447192	1.59172e-06	2.56e-05	0.000175	2.37e-05	0.000101
23.52	5.25246e-05	-0.000270233	-9.87053e-05	-0.000387366	-0.00011	4.66e-05	-0.00027	-0.00028
23.76	-0.000225466	-0.000404118	-0.000401381	0.000154432	-0.00053	-0.00016	-0.0003	-0.00019
24	6.91137e-05	-0.000332522	-0.000119009	-0.000240674	0.000245	9.48e-05	-0.00019	5.23e-05
24.24	1.14005e-05	-0.000215534	-0.000310549	1.77636e-05	-0.00018	-0.00024	2.4e-05	-0.00011
24.48	-3.06326e-05	0.000109205	-7.61291e-05	-0.000155342	7.46e-05	7.17e-05	-4.2e-05	-0.00022
24.72	-0.000194569	-0.000167021	1.67355e-06	-0.000135295	-0.00047	-0.00024	-0.00015	-0.00044
24.96	-0.000125372	-0.000160708	-0.000325834	-0.000652152	-0.0001	1.79e-05	-0.00015	-0.00033
25.2	-0.000160936	-0.000278703	6.35603e-05	-0.000277651	1.52e-05	0.000149	-1.8e-05	-2.5e-05
25.44	-0.000233059	-0.000304907	-0.00040001	8.01665e-05	-0.00016	-9.9e-05	-8.5e-05	0.000163
25.68	-0.000136108	2.47289e-05	-3.8137e-05	-0.0002131	2.76e-05	-0.00022	-6.1e-05	-0.00019
25.92	-0.000274924	-7.69581e-05	6.49626e-05	-0.000157784	9.15e-05	-8.8e-05	9.08e-05	-0.00023
26.16	-0.000115607	3.57132e-05	-4.30188e-05	-0.000241625	-4.7e-05	-7.3e-05	-0.00013	7.87e-05
26.4	-0.000179609	-0.000212474	-0.000279773	-0.000251251	-1.5e-05	7.95e-05	-0.00016	-2.6e-05
26.64	8.16773e-05	-9.74088e-05	-0.000203522	-2.48214e-05	-0.00018	-0.00012	-0.00018	-2.1e-05
26.88	-9.95313e-05	-0.000477921	6.7341e-05	7.09604e-05	0.000143	-0.00016	7.18e-06	-0.0005
27.12	1.97401e-05	-8.68216e-05	6.90028e-06	2.28538e-05	0.000112	-0.00013	0.000155	-0.00011
27.36	1.64993e-05	-9.77094e-06	8.04333e-05	-0.000136876	-0.00038	-1.1e-05	-9.3e-05	3.46e-05
27.6	-0.000198974	-4.31367e-05	6.93135e-05	-0.000183508	-0.00051	-0.00017	0.000111	-0.00019
27.84	-0.000234235	-3.76482e-05	-0.00019377	-0.00018243	-0.00014	0.00015	-0.0003	-0.00039
28.08	-0.000364625	-0.000271835	-0.00021742	5.73391e-05	0.000222	-0.00048	-8.6e-05	-8.5e-05
28.32	-3.57719e-05	-0.000300976	0.00056686	-0.000240216	-0.00044	-7.2e-05	-0.00033	-0.0004
28.56	4.28747e-05	-0.000248632	-0.000331191	-0.000407925	-0.00015	-0.00042	-2.2e-05	-0.00017
28.8	0.000156789	-0.000288704	0.000115947	-0.000232223	-5.7e-05	-0.00019	-0.00014	-0.00015
29.04	0.000154048	-5.06142e-05	-9.61811e-06	-0.00026343	-4.6e-05	-0.00016	-4.6e-05	-0.0002
29.28	0.000236095	-0.000126206	3.34335e-05	0.000187187	0.000449	0.000102	-0.00017	-0.00018
29.52	5.91081e-05	-0.000246672	0.000125501	-0.000480549	-0.00027	-0.00035	-0.00016	-0.00027
29.76	0.00016671	9.42441e-05	9.94191e-05	-0.000260254	-0.00023	-7.1e-05	8.96e-05	-0.00028
30	-0.000275941	-0.000365997	-0.000385014	0.000275936	-0.00014	-0.00013	-0.00023	-0.00022
30.24	-0.000232585	-0.000548508	-0.000278379	-0.000542424	-0.0001	-0.00037	0.00026	-0.00014
30.48	-3.81064e-05	-0.00057222	-0.00024529	-0.000598168	0.000161	-0.0004	-0.00019	9.68e-06
30.72	-5.72368e-05	-0.000190939	2.72899e-05	-0.000299657	-0.00028	-0.00017	0.00015	1.66e-05
30.96	0.000377952	-0.000132023	0.000210452	0.000346114	0.000138	-0.00011	-0.0002	6.65e-05
31.2	0.000436535	0.000212075	0.000292073	-0.000361968	0.000352	0.000131	-0.00037	0.000421
31.44	0.0008354	0.000129346	0.000231141	0.000998795	0.000186	0.000102	-0.00027	0.000686
31.68	0.00101888	0.000226777	0.000441341	0.000738018	0.00101	0.000253	3.69e-05	0.000798
31.92	0.00123581	0.000190237	0.000715207	0.00106654	0.000802	0.000239	0.000269	0.000801
32.16	0.00101782	0.000681194	0.000966055	0.00120198	0.001214	0.00039	0.00038	0.001115
32.4	0.00173995	0.00078627	0.00124662	0.00189398	0.001297	0.000814	0.00049	0.001098
32.64	0.0015884	0.000820266	0.00123398	0.001926	0.00168	0.000564	0.000644	0.001622
32.88	0.00189268	0.000997387	0.00124402	0.0018897	0.001913	0.000818	0.000827	0.001623
33.12	0.00238832	0.00103153	0.00152276	0.0019969	0.002083	0.000932	0.000799	0.001867
33.36	0.00230229	0.0011179	0.00172088	0.00243872	0.001725	0.001011	0.00083	0.00209
33.6	0.00267646	0.00122597	0.0020112	0.00281779	0.0024	0.001305	0.001243	0.002742
33.84	0.00276876	0.0013878	0.00203426	0.00300152	0.002591	0.000978	0.001363	0.002442
34.08	0.0032407	0.00177076	0.00238688	0.00346408	0.002521	0.001297	0.00139	0.002435
34.32	0.0030258	0.00171771	0.00265204	0.00343553	0.003436	0.001206	0.001418	0.003234
34.56	0.00361746	0.00166435	0.00261992	0.00386704	0.003525	0.001743	0.001431	0.003204
34.8	0.00336742	0.00196002	0.00286142	0.00404689	0.002954	0.001692	0.001665	0.003335
35.04	0.00357495	0.0020389	0.0028779	0.00415301	0.003756	0.001708	0.001662	0.003529
35.28	0.00434877	0.00234993	0.00318385	0.00452648	0.004149	0.00161	0.001957	0.00369
35.52	0.00417509	0.00257844	0.00338461	0.00435981	0.003979	0.002017	0.002147	0.003805
35.76	0.00424348	0.00259445	0.00333399	0.00473015	0.004266	0.001935	0.002123	0.004146
36	0.00473506	0.00299952	0.00348661	0.00478425	0.004633	0.001739	0.002203	0.004059
36.24	0.00504265	0.00302017	0.00367227	0.00497495	0.004709	0.002069	0.002552	0.0041
36.48	0.00509327	0.00290395	0.00373812	0.00508476	0.004752	0.002308	0.002543	0.004575
36.72	0.00504456	0.00286766	0.00383965	0.00532708	0.004897	0.002263	0.002801	0.004428
36.96	0.00557119	0.00293313	0.00427071	0.00515143	0.005012	0.002276	0.002777	0.004946
37.2	0.00576385	0.00270331	0.00385158	0.00524766	0.00512	0.002657	0.00288	0.004883
37.44	0.00552146	0.00293958	0.00439512	0.0058245	0.005334	0.002546	0.003001	0.004919
37.68	0.00572879	0.00302199	0.00459452	0.00556178	0.004874	0.002591	0.003087	0.005212
37.92	0.00559836	0.00317352	0.00438645	0.0059694	0.005329	0.002566	0.002855	0.00505
38.16	0.00576224	0.00331313	0.00437169	0.00622677	0.005894	0.002487	0.003197	0.005291
38.4	0.00656376	0.00314533	0.00464754	0.00622648	0.00554	0.002753	0.002993	0.005452
38.64	0.00620048	0.00340497	0.00464235	0.0065002	0.006094	0.002927	0.003693	0.005461
38.88	0.00657117	0.00353461	0.00441718	0.00662339	0.00581	0.002981	0.003351	0.005879
39.12	0.00651013	0.00386724	0.00526159	0.00665297	0.006032	0.00291	0.00316	0.005652
39.36	0.00648117	0.00364704	0.00505177	0.00672769	0.005944	0.00321	0.003584	0.005704
39.6	0.00641855	0.00335337	0.0053075	0.00684476	0.006197	0.003224	0.003745	0.005705
39.84	0.00680739	0.00392637	0.00513295	0.0071908	0.006274	0.003152	0.003423	0.006121
40.08	0.0068386	0.0036998	0.00511299	0.00703283	0.006535	0.003385	0.003777	0.006149
40.32	0.00705126	0.00400957	0.00541178	0.00727324	0.006107	0.003381	0.003709	0.005883
40.56	0.00730151	0.00377988	0.0054916	0.00738629	0.006594	0.003236	0.003705	0.006229
40.8	0.00716625	0.00389967	0.00567224	0.00738479	0.006307	0.003388	0.004154	0.006206
41.04	0.00752264	0.00427141	0.00551961	0.00772707	0.00694	0.00359	0.004028	0.006396
41.28	0.00728737	0.00397895	0.0052231	0.00720449	0.006597	0.003673	0.0037	0.006807
41.52	0.00729339	0.0039557	0.00564362	0.0079955	0.00692	0.00368	0.004109	0.006589
41.76	0.0075258	0.00416882	0.00552131	0.00808342	0.006843	0.003879	0.004333	0.00674
42	0.00788882	0.00416765	0.00591094	0.00768123	0.007083	0.00366	0.004139	0.006608
42.24	0.00768077	0.00426519	0.00574223	0.00768932	0.007153	0.003747	0.004301	0.006648
42.48	0.00802454	0.00435608	0.00590422	0.00803116	0.00699	0.003846	0.004227	0.006903
42.72	0.00782132	0.00430078	0.00618772	0.0082701	0.007066	0.003735	0.004387	0.007255
42.96	0.00745931	0.00411981	0.00610709	0.00791898	0.007178	0.003897	0.004494	0.007142
43.2	0.0077797	0.00422759	0.00620382	0.00819833	0.007023	0.003915	0.004844	0.006727
43.44	0.00775879	0.00438828	0.00599546	0.00789957	0.007478	0.004079	0.00507	0.007322
43.68	0.00797457	0.00428887	0.00592263	0.00829972	0.007285	0.004044	0.004734	0.007146
43.92	0.00783162	0.00420505	0.0062353	0.00835428	0.007277	0.004222	0.004924	0.007192
44.16	0.00838691	0.00434236	0.00636376	0.00820538	0.007466	0.003955	0.004905	0.007266
44.4	0.00815024	0.00434433	0.00658284	0.00897422	0.007477	0.004042	0.004765	0.00776
44.64	0.008644	0.00466892	0.0064353	0.00879821	0.007486	0.004286	0.004774	0.007428
44.88	0.00825799	0.00452535	0.00638416	0.0086743	0.007879	0.004409	0.004522	0.007966
45.12	0.00839855	0.00465788	0.00662205	0.00883001	0.007633	0.004167	0.004985	0.007451
45.36	0.00829042	0.0047416	0.00662705	0.00865615	0.007394	0.004187	0.004938	0.007656
45.6	0.00853339	0.00471356	0.00651348	0.00914169	0.00801	0.004506	0.005133	0.007782
45.84	0.00843583	0.00452541	0.00678508	0.00922048	0.007691	0.004348	0.005119	0.007534
46.08	0.00866883	0.00497304	0.006564	0.00913423	0.007422	0.004221	0.004924	0.007735
46.32	0.0088027	0.00461747	0.00669773	0.0091577	0.00789	0.004532	0.004769	0.007725
46.56	0.00832452	0.00475566	0.00666162	0.0086998	0.007918	0.004456	0.005101	0.007607
46.8	0.00900061	0.0048784	0.00656281	0.00915452	0.008036	0.004818	0.005313	0.007913
47.04	0.00840775	0.00467939	0.00665487	0.00905603	0.007632	0.004535	0.00495	0.008063
47.28	0.00845745	0.00470509	0.00680884	0.00911113	0.008267	0.004474	0.005257	0.007768
47.52	0.00893306	0.00450747	0.00684912	0.00930845	0.008123	0.004552	0.005138	0.007844
47.76	0.00844916	0.00523297	0.00669509	0.00971527	0.008034	0.004497	0.005352	0.008406
48	0.00868166	0.0047169	0.00700175	0.00958829	0.007637	0.00491	0.005609	0.007725
48.24	0.00885623	0.00492063	0.00708341	0.00930663	0.008477	0.004639	0.005471	0.008238
48.48	0.0089732	0.00477306	0.00729861	0.00992591	0.007964	0.004579	0.005626	0.008326
48.72	0.00861972	0.00468058	0.00703208	0.0097241	0.008455	0.00461	0.005826	0.008342
48.96	0.00882803	0.00489025	0.00692006	0.0100093	0.008585	0.004517	0.005436	0.008171
49.2	0.00879814	0.00498975	0.00732567	0.00937092	0.008338	0.004769	0.005618	0.008401
49.44	0.00893707	0.00469684	0.0069315	0.0095942	0.008719	0.004744	0.005503	0.008301
49.68	0.00908523	0.00482796	0.00711475	0.00963781	0.008643	0.00498	0.005734	0.008502
49.92	0.00866446	0.00494262	0.0072667	0.00942622	0.008432	0.004879	0.005471	0.008416
50.16	0.00897325	0.00485724	0.00709197	0.00987744	0.008738	0.004612	0.005453	0.008453
50.4	0.00956762	0.00532654	0.00731053	0.00938621	0.008592	0.004782	0.00568	0.008342
50.64	0.00904126	0.00497056	0.00715372	0.00950848	0.009017	0.005128	0.005657	0.008753
50.88	0.00936239	0.00491462	0.0074563	0.00982696	0.00888	0.005122	0.005887	0.008791
51.12	0.00949235	0.0053625	0.00723105	0.00967176	0.008651	0.005012	0.005863	0.008418
51.36	0.009603	0.00521326	0.00725127	0.0102307	0.008373	0.005059	0.006291	0.008569
51.6	0.00930406	0.00474562	0.00741127	0.00997715	0.008461	0.004929	0.00579	0.008822
51.84	0.00922754	0.00519037	0.00720191	0.00954753	0.009073	0.004938	0.005777	0.008624
52.08	0.00968413	0.00528429	0.0073477	0.00971237	0.009049	0.004964	0.005881	0.008388
52.32	0.00965188	0.00499038	0.00763397	0.0100731	0.00881	0.005013	0.00597	0.008862
52.56	0.00957373	0.00530101	0.00747874	0.010379	0.008761	0.005122	0.005925	0.008909
52.8	0.00937806	0.00507326	0.00718718	0.0100781	0.008555	0.004697	0.005701	0.009014
53.04	0.00964623	0.00493607	0.00757463	0.0100772	0.008552	0.005204	0.005993	0.008584
53.28	0.00961971	0.00530825	0.00737669	0.0100751	0.009106	0.004954	0.006082	0.008781
53.52	0.00952696	0.00529612	0.00738629	0.0101304	0.009374	0.005275	0.006247	0.008632
53.76	0.00943474	0.00510424	0.00750995	0.0102787	0.009001	0.005021	0.005672	0.008697
54	0.00972326	0.00531713	0.00782965	0.0103771	0.009063	0.005203	0.005623	0.009081
54.24	0.0099522	0.00548947	0.00742037	0.0100393	0.009321	0.005204	0.005838	0.009003
54.48	0.00993728	0.00508991	0.00763941	0.0108481	0.009183	0.005111	0.006251	0.009157
54.72	0.00969774	0.00507234	0.00720746	0.00986159	0.009351	0.005342	0.006188	0.009325
54.96	0.00956919	0.00526423	0.00754223	0.0102201	0.008985	0.00542	0.006377	0.009044
55.2	0.0091974	0.00517672	0.00752589	0.0102221	0.008898	0.005199	0.006354	0.009121
55.44	0.00974727	0.00539173	0.00779876	0.0101627	0.009328	0.005085	0.006174	0.009235
55.68	0.00991584	0.0053216	0.00775688	0.0104583	0.009353	0.005256	0.006133	0.00931
55.92	0.00986832	0.0052732	0.00770355	0.0105051	0.008748	0.005253	0.006358	0.009209
56.16	0.00975003	0.00544814	0.00758775	0.0106231	0.009051	0.005508	0.006403	0.009148
56.4	0.00984945	0.00513265	0.00767858	0.0105776	0.009358	0.005294	0.006531	0.009242
56.64	0.00973416	0.00540141	0.00753842	0.010375	0.009246	0.005259	0.006669	0.009314
56.88	0.0103099	0.00542967	0.00829335	0.0105882	0.009645	0.005346	0.006563	0.009358
57.12	0.00999805	0.00540209	0.00819211	0.0101589	0.009559	0.005384	0.00677	0.009617
57.36	0.00956492	0.00535479	0.00802132	0.0106273	0.009316	0.005449	0.006548	0.009112
57.6	0.0102783	0.00551355	0.00796909	0.01065	0.009376	0.005301	0.006663	0.00933
57.84	0.0102978	0.00570682	0.00783346	0.0104151	0.00932	0.005447	0.006465	0.009545
58.08	0.0105244	0.00551489	0.00765553	0.0105189	0.009332	0.005558	0.006357	0.009334
58.32	0.0101191	0.00530274	0.00802951	0.0107899	0.009615	0.005571	0.006341	0.009568
58.56	0.0100576	0.005362	0.00787394	0.0110826	0.009566	0.005448	0.006497	0.009354
58.8	0.00984646	0.00560201	0.00766987	0.0109713	0.009386	0.005466	0.006264	0.009567
59.04	0.0101482	0.00547231	0.00787246	0.0109883	0.0095	0.005497	0.006367	0.009271
59.28	0.00973669	0.00529895	0.00804117	0.0109138	0.009798	0.005641	0.006508	0.009091
59.52	0.0100523	0.00534703	0.00786376	0.0109606	0.009644	0.005777	0.006288	0.009519
59.76	0.0102871	0.00549757	0.00822773	0.010973	0.009677	0.005506	0.006397	0.009763
60	0.0102599	0.00554001	0.00809677	0.0105945	0.009717	0.005641	0.006603	0.00942
60.24	0.0101639	0.00532553	0.00826419	0.0106299	0.009778	0.005448	0.00626	0.00961
60.48	0.00991403	0.0055593	0.00798725	0.0108118	0.009951	0.005681	0.006534	0.009676
60.72	0.0103457	0.00555697	0.0080424	0.0110554	0.009764	0.005642	0.006439	0.009698
60.96	0.010604	0.00537421	0.00834606	0.0106177	0.009894	0.005623	0.006976	0.009769
61.2	0.0103217	0.00567846	0.0079351	0.0107086	0.009705	0.005595	0.00654	0.009544
61.44	0.0105654	0.005404	0.00808815	0.0107368	0.009851	0.00563	0.006515	0.009486
61.68	0.0101502	0.00566596	0.00817668	0.0112127	0.009489	0.005835	0.006728	0.009822
61.92	0.0101411	0.00536762	0.00823531	0.0107818	0.009969	0.005814	0.006476	0.009498
62.16	0.0103593	0.00558768	0.00844023	0.0106122	0.009678	0.005355	0.006913	0.009852
62.4	0.0106392	0.00561629	0.0080423	0.0109052	0.009936	0.005644	0.006863	0.009748
62.64	0.0103315	0.00548691	0.00853929	0.0109233	0.010118	0.005512	0.006832	0.009997
62.88	0.0107825	0.00549081	0.00832807	0.011215	0.010076	0.005781	0.006695	0.009924
63.12	0.010351	0.00563145	0.00815926	0.0110374	0.009718	0.005787	0.006879	0.009849
63.36	0.0107664	0.00565459	0.00813177	0.0110276	0.01012	0.005841	0.006873	0.009861
63.6	0.0108508	0.00540305	0.00823283	0.0115613	0.009762	0.005632	0.006688	0.009528
63.84	0.00993635	0.00541382	0.00828776	0.0112051	0.009858	0.00589	0.00675	0.009917
64.08	0.0106439	0.00554159	0.00813485	0.0113008	0.009655	0.005763	0.006787	0.010073
64.32	0.0104585	0.00576598	0.00852074	0.0111933	0.009998	0.00562	0.006862	0.009676
64.56	0.0105367	0.00566325	0.00860572	0.0113763	0.010255	0.006011	0.006811	0.009913
64.8	0.0104153	0.00550415	0.00852771	0.0109733	0.010051	0.005573	0.006684	0.010005
65.04	0.0108021	0.00532254	0.00811812	0.0111946	0.009983	0.005743	0.00675	0.009929
65.28	0.0105089	0.00522698	0.00826444	0.0111976	0.01016	0.005514	0.006853	0.009844
65.52	0.0104998	0.00562836	0.00795047	0.0112785	0.009965	0.005477	0.006679	0.009932
65.76	0.0108895	0.00570731	0.00810202	0.0115431	0.010076	0.005696	0.006789	0.010273
66	0.0104455	0.0053469	0.00825922	0.0113402	0.009644	0.005743	0.006712	0.009786
66.24	0.0106632	0.00547151	0.00844924	0.0112443	0.010289	0.005505	0.007103	0.010149
66.48	0.0106678	0.00538414	0.00837652	0.0114105	0.009959	0.005812	0.007051	0.010416
66.72	0.0106115	0.00572507	0.00823173	0.0115289	0.010405	0.005885	0.007186	0.010003
66.96	0.0108324	0.00562901	0.00854848	0.0111015	0.010476	0.005925	0.007201	0.010154
67.2	0.0109711	0.00568175	0.00856376	0.0112527	0.010186	0.005636	0.007087	0.010246
67.44	0.0107606	0.00581557	0.00822576	0.0113087	0.010154	0.005958	0.006784	0.01054
67.68	0.0107215	0.00564082	0.00827	0.0113152	0.01059	0.005841	0.006821	0.010464
67.92	0.0106811	0.0057756	0.00823446	0.0113986	0.010107	0.00569	0.007197	0.009841
68.16	0.0106132	0.00559046	0.0085655	0.0110341	0.01035	0.005815	0.006855	0.010317
68.4	0.0105073	0.00545974	0.00830063	0.0114446	0.010073	0.005704	0.007107	0.010284
68.64	0.0107878	0.00565671	0.00825917	0.0113494	0.009833	0.005881	0.007261	0.010357
68.88	0.0111483	0.005429	0.00819581	0.011546	0.010433	0.005866	0.007226	0.009963
69.12	0.0105533	0.00560506	0.00847188	0.0111395	0.010246	0.005727	0.007105	0.010489
69.36	0.0108504	0.00578315	0.00865883	0.0116702	0.010181	0.005643	0.006999	0.010341
69.6	0.0111946	0.00546143	0.00868161	0.0116091	0.010605	0.00608	0.007197	0.01006
69.84	0.0108657	0.005571	0.00844463	0.0117374	0.010527	0.0059	0.00726	0.010244
70.08	0.0105141	0.00549858	0.00855192	0.0112421	0.010473	0.005834	0.00696	0.010109
70.32	0.0108104	0.0054651	0.00818808	0.0117692	0.010296	0.005918	0.006926	0.010527
70.56	0.0109598	0.00545684	0.00864605	0.0116637	0.0103	0.006033	0.007053	0.009931
70.8	0.0110191	0.00567628	0.00862259	0.0118199	0.010349	0.006022	0.007302	0.010459
71.04	0.0111766	0.00571953	0.00840637	0.0115493	0.010687	0.006085	0.007123	0.010286
71.28	0.01089	0.00559276	0.0079676	0.0117035	0.010502	0.006109	0.006987	0.010228
71.52	0.0107169	0.00575253	0.00860358	0.0115389	0.010228	0.005679	0.007352	0.010461
71.76	0.0109628	0.0056625	0.00853402	0.011529	0.010149	0.005778	0.007071	0.010323
72	0.0109715	0.00529155	0.00850413	0.0118347	0.010706	0.005704	0.008032	0.010286
72.24	0.0106652	0.00571652	0.00893169	0.0116343	0.010334	0.006096	0.006967	0.010793
72.48	0.0111386	0.00559658	0.0087684	0.0114565	0.010905	0.005909	0.006956	0.010273
72.72	0.0108848	0.00552468	0.00866132	0.0119533	0.010751	0.006091	0.007256	0.01069
72.96	0.0111662	0.00581264	0.00877162	0.0115797	0.010306	0.006014	0.007066	0.010266
73.2	0.0111046	0.00596109	0.00873183	0.0118596	0.010472	0.006174	0.00695	0.010845
73.44	0.0111198	0.00540081	0.00863915	0.0117631	0.010485	0.005858	0.007234	0.010108
73.68	0.0109767	0.00582998	0.00854341	0.0115035	0.010805	0.006157	0.007288	0.010467
73.92	0.0108772	0.00556325	0.00856786	0.0116574	0.010564	0.005367	0.007249	0.010582
74.16	0.0109292	0.00563486	0.00889593	0.0113025	0.010564	0.005926	0.007348	0.010692
74.4	0.011115	0.00561717	0.00854343	0.0114158	0.010552	0.005898	0.007244	0.010543
74.64	0.0112934	0.00570776	0.00853524	0.0114824	0.010608	0.0061	0.007451	0.010345
74.88	0.0110787	0.00590148	0.00891425	0.01213	0.010355	0.0059	0.007727	0.010668
75.12	0.0109179	0.00565456	0.00870114	0.0116862	0.01082	0.00589	0.007152	0.01103
75.36	0.0112588	0.00599298	0.00892204	0.0117469	0.010616	0.006157	0.00721	0.010442
75.6	0.0111081	0.00538067	0.00856255	0.0119957	0.011001	0.006204	0.007554	0.010555
75.84	0.0115698	0.00581542	0.00878325	0.0119952	0.010646	0.006224	0.007161	0.010539
76.08	0.010807	0.00594796	0.00855871	0.0118351	0.010875	0.005937	0.007552	0.010649
76.32	0.0109698	0.00587451	0.0087694	0.0118532	0.010423	0.006136	0.007422	0.010719
76.56	0.0109336	0.00555782	0.00873242	0.0119279	0.010707	0.006272	0.007338	0.010445
76.8	0.011384	0.00549891	0.00871943	0.0120236	0.010834	0.006053	0.007392	0.010529
77.04	0.0107693	0.00577389	0.00890699	0.011827	0.010947	0.006234	0.00738	0.010715
77.28	0.0112471	0.0054159	0.00856546	0.0118973	0.010728	0.005958	0.007301	0.01067
77.52	0.0112046	0.00552791	0.0088154	0.0116014	0.010588	0.005997	0.007555	0.010777
77.76	0.0113205	0.0056349	0.0089411	0.0118838	0.010899	0.005994	0.007612	0.010794
78	0.0109099	0.00587516	0.00859318	0.0120706	0.010764	0.006346	0.007586	0.010844
78.24	0.0116945	0.00566015	0.00863637	0.0125686	0.010711	0.005752	0.007332	0.010653
78.48	0.0110369	0.00529854	0.00885143	0.0110476	0.010793	0.006387	0.007712	0.011117
78.72	0.0111905	0.00582883	0.00877241	0.0116338	0.011292	0.005911	0.007432	0.010538
78.96	0.011281	0.00578602	0.00873119	0.0119739	0.010861	0.005852	0.007355	0.010635
79.2	0.0110091	0.00591053	0.00880986	0.0110317	0.010847	0.006079	0.007671	0.010994
79.44	0.0110329	0.00557935	0.0088659	0.0123086	0.011217	0.006223	0.007645	0.011011
79.68	0.0110035	0.00558451	0.0086125	0.0117037	0.01078	0.006054	0.007612	0.010585
79.92	0.011087	0.00570511	0.00873337	0.0120414	0.010359	0.006152	0.007748	0.010984
80.16	0.0111067	0.00578039	0.00896225	0.0115737	0.010854	0.00617	0.007695	0.010766
80.4	0.0113581	0.00555702	0.00854644	0.0116821	0.010957	0.006294	0.007231	0.010991
80.64	0.0111764	0.00564964	0.00884522	0.011956	0.011095	0.006035	0.00733	0.010526
80.88	0.0111674	0.00564891	0.00863453	0.0119114	0.01093	0.005947	0.007748	0.01098
81.12	0.0113947	0.00567792	0.00890307	0.0120559	0.010892	0.006209	0.007398	0.011178
81.36	0.0114495	0.0056217	0.00890418	0.0122181	0.010629	0.006401	0.007413	0.011153
81.6	0.0113575	0.0056925	0.00877871	0.0117909	0.010877	0.00613	0.007526	0.010576
81.84	0.011498	0.00552827	0.00876481	0.0116676	0.010964	0.006324	0.007322	0.010761
82.08	0.011201	0.00544387	0.00862523	0.0121678	0.010578	0.006161	0.007412	0.010863
82.32	0.0113287	0.0057711	0.00856139	0.0122831	0.01116	0.006153	0.007448	0.011199
82.56	0.0113257	0.00590634	0.00881915	0.0119735	0.010927	0.006204	0.007551	0.010701
82.8	0.0108826	0.00581645	0.00888569	0.0118368	0.011079	0.006128	0.007595	0.011276
83.04	0.0113293	0.00583005	0.00864034	0.0119266	0.011004	0.006007	0.007646	0.010823
83.28	0.0110429	0.00571489	0.00893663	0.0120547	0.011118	0.006362	0.007934	0.010959
83.52	0.0115437	0.00579479	0.00852184	0.0123891	0.011002	0.006182	0.007801	0.010707
83.76	0.0112617	0.00577965	0.00891206	0.0119201	0.011193	0.006168	0.007952	0.011012
84	0.0111558	0.00606042	0.00894119	0.0124924	0.010815	0.006186	0.007832	0.011097
84.24	0.0114132	0.00565148	0.00874767	0.0119124	0.010643	0.006486	0.007679	0.010895
84.48	0.0117324	0.00559779	0.00889091	0.0118477	0.0112	0.006279	0.007865	0.010832
84.72	0.0111899	0.00583674	0.00880959	0.0121583	0.011217	0.006182	0.007855	0.011198
84.96	0.0112616	0.00582345	0.00863954	0.0124432	0.011327	0.005993	0.007603	0.011317
85.2	0.0112004	0.00577424	0.00877468	0.0121585	0.01029	0.006257	0.007552	0.01093
85.44	0.0112818	0.00579556	0.00881838	0.0122282	0.010901	0.006179	0.008127	0.010706
85.68	0.0114524	0.00556799	0.00887505	0.0120285	0.011046	0.006263	0.008101	0.011034
85.92	0.0111552	0.00577502	0.00904028	0.0122854	0.010794	0.006196	0.007588	0.010809
86.16	0.0112182	0.00583583	0.0089029	0.0123943	0.010683	0.006283	0.007805	0.011118
86.4	0.011324	0.00556243	0.00907678	0.0119673	0.011004	0.0064	0.007979	0.010904
86.64	0.0113982	0.00569528	0.0089558	0.0122068	0.011253	0.006537	0.008052	0.011168
86.88	0.0114111	0.00572844	0.0090038	0.0117276	0.011293	0.006446	0.0078	0.011141
87.12	0.0113923	0.00543802	0.00896479	0.0122384	0.011205	0.006351	0.008008	0.010869
87.36	0.0109713	0.00567603	0.00887057	0.0122012	0.010807	0.006202	0.007967	0.010823
87.6	0.0114809	0.00569406	0.00876068	0.0129565	0.011265	0.006437	0.007683	0.011029
87.84	0.0112486	0.00581899	0.00903514	0.0120939	0.010798	0.006302	0.007757	0.010938
88.08	0.0110708	0.00584898	0.00862343	0.0123511	0.011434	0.006336	0.007756	0.011189
88.32	0.0110364	0.00608793	0.00909261	0.0124363	0.01069	0.006225	0.007668	0.011125
88.56	0.0112881	0.00559586	0.00894842	0.0122056	0.011376	0.006098	0.008026	0.011269
88.8	0.0116224	0.00558645	0.00887231	0.0122933	0.010979	0.006257	0.007712	0.011087
89.04	0.0112939	0.00569899	0.00906521	0.0123855	0.011323	0.006484	0.00769	0.011006
89.28	0.0112388	0.00592913	0.00898944	0.0124621	0.010689	0.00635	0.007988	0.010895
89.52	0.0117643	0.00595454	0.0090637	0.0126778	0.011202	0.006304	0.007868	0.011533
89.76	0.0115776	0.00580103	0.00862518	0.0117985	0.01103	0.006035	0.007929	0.011059
90	0.011512	0.00555767	0.00920257	0.0118752	0.010924	0.006135	0.007973	0.011127
90.24	0.0114084	0.00567219	0.00882247	0.0124221	0.011173	0.006479	0.008002	0.011067
90.48	0.011815	0.00585362	0.00876954	0.0120288	0.011059	0.006008	0.007985	0.011252
90.72	0.011278	0.00552465	0.00914906	0.0118804	0.011385	0.006377	0.007838	0.011083
90.96	0.0115886	0.00575458	0.00888206	0.0120047	0.011355	0.006188	0.008067	0.011064
91.2	0.0114482	0.00573667	0.00906552	0.0119942	0.011665	0.00653	0.008096	0.011041
91.44	0.0114622	0.00572514	0.00896896	0.0124031	0.011428	0.006514	0.008109	0.011247
91.68	0.011254	0.00567274	0.00900375	0.012454	0.011363	0.006229	0.00785	0.011248
91.92	0.0116375	0.00573323	0.00920411	0.0114597	0.010984	0.006716	0.008008	0.011455
92.16	0.0112194	0.00578681	0.00852193	0.0122451	0.011101	0.006254	0.008069	0.011091
92.4	0.0115592	0.00581432	0.0090525	0.0121162	0.010897	0.006055	0.00806	0.011263
92.64	0.0113808	0.00557119	0.0092041	0.0123468	0.011031	0.006168	0.008003	0.011188
92.88	0.0112384	0.0054523	0.00930409	0.0120256	0.010968	0.006242	0.007749	0.011516
93.12	0.0112818	0.00554976	0.00899319	0.0123043	0.011215	0.006459	0.007816	0.011638
93.36	0.011828	0.00582673	0.00909043	0.0122876	0.011236	0.006457	0.00809	0.011162
93.6	0.0117383	0.00577211	0.0089698	0.0121309	0.011368	0.006299	0.008221	0.011383
93.84	0.011654	0.00556243	0.0094238	0.0121269	0.011209	0.006343	0.008002	0.011284
94.08	0.0115572	0.00607065	0.00915622	0.0128267	0.011272	0.006473	0.007732	0.011434
94.32	0.0113288	0.005718	0.00923638	0.0120606	0.011223	0.00644	0.008209	0.011164
94.56	0.0116214	0.00574444	0.00927827	0.0124879	0.011434	0.006387	0.007752	0.011618
94.8	0.0116288	0.00554463	0.00919368	0.0123383	0.011252	0.006665	0.007756	0.011608
95.04	0.0114604	0.00594437	0.00863837	0.0122578	0.011503	0.006247	0.008223	0.011151
95.28	0.0113205	0.00561996	0.00908744	0.012637	0.011536	0.006384	0.007898	0.011053
95.52	0.0119597	0.00577675	0.00895162	0.0119162	0.011377	0.006091	0.007748	0.011641
95.76	0.0113603	0.00601404	0.00903037	0.012319	0.011236	0.006595	0.008151	0.011303
96	0.0114381	0.00586435	0.00922519	0.0125532	0.011155	0.006544	0.008375	0.011305
96.24	0.0114365	0.00573156	0.00918529	0.0123541	0.011451	0.0065	0.00833	0.011353
96.48	0.0117913	0.00559355	0.00935231	0.0126037	0.011328	0.006573	0.007977	0.011001
96.72	0.0114325	0.00601337	0.00893576	0.0123751	0.011485	0.006441	0.007849	0.011129
96.96	0.0115934	0.00573844	0.00879471	0.0119489	0.011109	0.006325	0.007828	0.0115
97.2	0.0118593	0.00581744	0.0088737	0.0123849	0.011481	0.006289	0.008319	0.011526
97.44	0.0113514	0.00582905	0.00923373	0.0120867	0.011854	0.006367	0.00801	0.011864
97.68	0.0111426	0.00588767	0.00917405	0.0125984	0.011732	0.006494	0.008185	0.011741
97.92	0.0113398	0.00566556	0.00912495	0.0125232	0.011121	0.006439	0.008356	0.011509
98.16	0.0119312	0.0057143	0.00922953	0.0122866	0.01124	0.006372	0.008198	0.01172
98.4	0.0113691	0.0058953	0.00912451	0.0124734	0.011053	0.006757	0.008036	0.011296
98.64	0.011121	0.00609468	0.00946247	0.0125776	0.011002	0.006467	0.007781	0.011612
98.88	0.0112897	0.00563457	0.00911413	0.0123462	0.011703	0.006155	0.008335	0.011617
99.12	0.011535	0.00590138	0.00894572	0.0125766	0.011627	0.00641	0.007796	0.011318
99.36	0.0114136	0.00587987	0.00932501	0.01295	0.011025	0.00615	0.008423	0.011367
99.6	0.0116015	0.00573824	0.00916884	0.01276	0.011278	0.006476	0.007985	0.010842
99.84	0.0116979	0.00551581	0.00921627	0.0123773	0.011422	0.006343	0.007956	0.011394
100.08	0.0112983	0.00567378	0.00927568	0.0127444	0.011216	0.006546	0.007991	0.011425
100.32	0.0119875	0.00583178	0.00907087	0.0126254	0.011603	0.00654	0.008427	0.011394
100.56	0.0114342	0.00555242	0.00920753	0.0126957	0.011158	0.006719	0.008146	0.011224
100.8	0.0117414	0.00559632	0.00913526	0.0127148	0.011123	0.006428	0.008285	0.011558
101.04	0.0114643	0.00536135	0.00915193	0.0128231	0.01126	0.006519	0.008473	0.011306
101.28	0.0118893	0.00580386	0.00922858	0.012706	0.011727	0.006049	0.008453	0.011918
101.52	0.0118877	0.00605598	0.00932392	0.0121347	0.01167	0.006473	0.008089	0.011622
101.76	0.0117931	0.00572497	0.00917699	0.0122943	0.011305	0.006598	0.008379	0.011452
102	0.0113019	0.00549463	0.00921094	0.0126058	0.011467	0.006472	0.00869	0.01146
102.24	0.0117053	0.0058717	0.00924259	0.0126821	0.011188	0.006225	0.008178	0.011816
102.48	0.0114031	0.00571705	0.00929974	0.0128092	0.011147	0.00658	0.007943	0.011809
102.72	0.0115215	0.00568823	0.00935279	0.0127483	0.011395	0.006474	0.00859	0.011553
102.96	0.0114758	0.00568132	0.00885711	0.0126873	0.010993	0.006629	0.008024	0.010872
103.2	0.0114167	0.00578348	0.00912193	0.0127639	0.011461	0.006372	0.008247	0.011762
103.44	0.0117469	0.00543242	0.00920688	0.0126137	0.011749	0.006423	0.008526	0.011581
103.68	0.0113375	0.0058811	0.00887939	0.0125598	0.011381	0.006354	0.008116	0.01148
103.92	0.0118599	0.00594054	0.00915181	0.0128678	0.011163	0.006307	0.008453	0.011516
104.16	0.011824	0.00568118	0.00956321	0.012786	0.011583	0.006162	0.00822	0.01161
104.4	0.0118158	0.00577595	0.00920433	0.0129732	0.01174	0.006418	0.008342	0.011318
104.64	0.0120801	0.00567151	0.00917129	0.0126345	0.011745	0.006354	0.008218	0.0117
104.88	0.0120557	0.00569861	0.00926269	0.012805	0.011606	0.00629	0.008334	0.011647
105.12	0.0116716	0.0058347	0.00902347	0.012658	0.012096	0.006459	0.008398	0.011658
105.36	0.0115878	0.00566914	0.0091438	0.0130975	0.01165	0.006732	0.008537	0.011099
105.6	0.0118993	0.00551471	0.0091038	0.0126557	0.011453	0.006299	0.008389	0.011651
105.84	0.0120355	0.00547129	0.00954893	0.013242	0.011135	0.006668	0.008316	0.011312
106.08	0.0121115	0.00577165	0.00903359	0.0127692	0.011737	0.006387	0.008007	0.01139
106.32	0.0117867	0.00557803	0.00894129	0.0127237	0.011645	0.006604	0.008553	0.011552
106.56	0.0113664	0.0059895	0.00897216	0.0123808	0.011452	0.006568	0.008393	0.01153
106.8	0.0115382	0.00564451	0.00910903	0.0126306	0.011494	0.006491	0.008464	0.011581
107.04	0.0120077	0.0058037	0.00922431	0.012765	0.011798	0.006202	0.008185	0.012034
107.28	0.0118566	0.00559109	0.00955931	0.0125158	0.011444	0.006307	0.008284	0.011665
107.52	0.0118707	0.00575393	0.00943121	0.0128523	0.012008	0.006755	0.008649	0.011669
107.76	0.0115686	0.005711	0.00924951	0.0126759	0.011772	0.006692	0.008436	0.011728
108	0.0117829	0.00562163	0.00930046	0.0128671	0.011773	0.006605	0.008559	0.011487
108.24	0.011664	0.00525374	0.00932326	0.0123967	0.011481	0.006529	0.008455	0.011585
108.48	0.0115029	0.00541842	0.00947986	0.0128193	0.01205	0.006178	0.008469	0.011597
108.72	0.0117223	0.00564917	0.00922178	0.0131143	0.011436	0.006525	0.008393	0.011623
108.96	0.0117427	0.00587633	0.00952754	0.0125832	0.011514	0.006581	0.008225	0.011864
109.2	0.011679	0.00542356	0.00931335	0.0128923	0.011614	0.006532	0.008615	0.011581
109.44	0.0119312	0.00594335	0.00967855	0.0126257	0.011747	0.006306	0.00866	0.011503
109.68	0.0116972	0.00556346	0.00907031	0.0128476	0.011405	0.006319	0.008276	0.011799
109.92	0.0117127	0.00581559	0.0092676	0.01328	0.01204	0.006325	0.008499	0.011605
110.16	0.0120152	0.00587094	0.00953961	0.0119824	0.011509	0.006513	0.008564	0.012042
110.4	0.0114333	0.00570241	0.00947282	0.0122967	0.011237	0.006114	0.008598	0.01154
110.64	0.0116068	0.00554939	0.00917394	0.012723	0.011653	0.006695	0.008368	0.011605
110.88	0.01174	0.00575518	0.00943959	0.0127975	0.011861	0.006322	0.00877	0.011703
111.12	0.0115901	0.00547327	0.00932044	0.0123651	0.011851	0.006254	0.008779	0.011542
111.36	0.0114917	0.00595503	0.00942265	0.0127683	0.011706	0.006515	0.008395	0.011901
111.6	0.011818	0.00558873	0.00952165	0.0122547	0.011444	0.006655	0.008915	0.01179
111.84	0.0120666	0.00542815	0.00934728	0.0129176	0.011676	0.006579	0.008186	0.011609
112.08	0.0118241	0.00559932	0.0095722	0.0122746	0.011883	0.006588	0.00838	0.011817
112.32	0.0115567	0.00579788	0.00925446	0.0130559	0.012008	0.006514	0.008687	0.012003
112.56	0.0117466	0.00552265	0.00924247	0.0125877	0.011762	0.006625	0.008754	0.011842
112.8	0.0118106	0.00573984	0.00925364	0.0129132	0.011964	0.006704	0.008598	0.011742
113.04	0.0118764	0.0055737	0.00926246	0.0126421	0.011814	0.006485	0.008534	0.011479
113.28	0.0115669	0.00562523	0.00950119	0.0126435	0.012077	0.006488	0.008733	0.011717
113.52	0.0119539	0.00526999	0.00912122	0.0131894	0.011702	0.006248	0.008108	0.01161
113.76	0.011806	0.00578698	0.00956373	0.0128402	0.011446	0.006545	0.008952	0.011629
114	0.0120624	0.00575752	0.00929606	0.0127691	0.011705	0.006758	0.008595	0.011578
114.24	0.0117009	0.00550844	0.00916323	0.012969	0.012154	0.006225	0.00865	0.01185
114.48	0.0118163	0.00578873	0.00958843	0.0127619	0.011524	0.006304	0.008614	0.011787
114.72	0.0116475	0.00565636	0.00944352	0.0127316	0.011698	0.006738	0.00827	0.011868
114.96	0.0121209	0.00553525	0.00937916	0.0129013	0.011491	0.006626	0.008477	0.012165
115.2	0.0120599	0.0058185	0.00929914	0.0128186	0.011738	0.006778	0.008564	0.011786
115.44	0.0118653	0.00576636	0.00922906	0.0131877	0.011454	0.006713	0.008648	0.011786
115.68	0.0119404	0.00585971	0.00913842	0.0127127	0.011804	0.006425	0.008723	0.01182
115.92	0.0119047	0.00532248	0.00928302	0.0129762	0.011773	0.006867	0.008727	0.012297
116.16	0.0116942	0.00565931	0.00972233	0.0128659	0.011749	0.006566	0.008587	0.011718
116.4	0.0116642	0.00549061	0.00907261	0.0128034	0.011794	0.006663	0.008522	0.011698
116.64	0.0118118	0.0058429	0.00969953	0.0129988	0.011678	0.006437	0.008932	0.011461
116.88	0.011961	0.00570124	0.00938672	0.0129018	0.011358	0.006636	0.008575	0.011985
117.12	0.0118598	0.00572038	0.0093348	0.0128938	0.0115	0.006529	0.008558	0.011531
117.36	0.0117853	0.00560643	0.0096112	0.0133154	0.011713	0.006472	0.008439	0.01148
117.6	0.0118244	0.00583696	0.00920709	0.0127208	0.012023	0.00643	0.008619	0.011759
117.84	0.0119607	0.00570222	0.00978037	0.0127829	0.011898	0.006605	0.008305	0.012148
118.08	0.0122359	0.0052955	0.0092713	0.0130619	0.011457	0.006484	0.008439	0.011648
118.32	0.0118081	0.00541374	0.00944661	0.0125516	0.011789	0.006373	0.008805	0.012207
118.56	0.0114871	0.00580632	0.00943198	0.0132656	0.012235	0.006676	0.008657	0.011873
118.8	0.0117857	0.0056359	0.00956866	0.0128124	0.012015	0.006841	0.008839	0.011816
119.04	0.0112656	0.00571468	0.00931898	0.0132815	0.011708	0.006581	0.008584	0.011777
119.28	0.0119208	0.00585815	0.00943482	0.0130078	0.01189	0.006612	0.008738	0.011345
119.52	0.011391	0.00539011	0.00937607	0.0128004	0.011844	0.006719	0.008989	0.011347
119.76	0.0115511	0.00567881	0.00914245	0.0128724	0.012053	0.006437	0.00861	0.012128
120	0.0116859	0.00562201	0.00929493	0.0133806	0.011526	0.006843	0.008644	0.011833
120.24	0.0117216	0.00553803	0.00945117	0.013106	0.011307	0.006435	0.008873	0.011658
120.48	0.0121013	0.00529257	0.00940489	0.0131346	0.012072	0.00641	0.008697	0.011833
120.72	0.0120154	0.00560344	0.00950854	0.0129989	0.011637	0.006632	0.008553	0.01166
120.96	0.0118093	0.00579745	0.00938544	0.0129011	0.012238	0.006532	0.008602	0.011445
121.2	0.01194	0.00559126	0.00946955	0.0129175	0.011808	0.006589	0.009028	0.011579
121.44	0.0117763	0.00560735	0.00940524	0.0127484	0.011848	0.006842	0.008727	0.011734
121.68	0.0117676	0.00545334	0.00945561	0.0131591	0.011533	0.007067	0.008807	0.012157
121.92	0.0114485	0.00553535	0.00957871	0.0124214	0.012252	0.006627	0.008698	0.012176
122.16	0.0123843	0.00537404	0.00904696	0.0129418	0.011717	0.006475	0.008564	0.011729
122.4	0.0116699	0.00568178	0.0093257	0.0131372	0.011658	0.006735	0.009057	0.011605
122.64	0.011816	0.00554445	0.00952861	0.0129048	0.011857	0.006719	0.008738	0.011684
122.88	0.0115181	0.00554185	0.00954012	0.0129199	0.011807	0.006552	0.008709	0.011842
123.12	0.0119335	0.00558245	0.00919776	0.0129449	0.01199	0.006864	0.008906	0.011505
123.36	0.011698	0.0055056	0.00919394	0.0128199	0.012058	0.006655	0.008724	0.011517
123.6	0.0118782	0.00536617	0.00945777	0.0126794	0.011757	0.006763	0.00882	0.011756
123.84	0.011757	0.00574641	0.0093937	0.0126838	0.011808	0.006867	0.009298	0.012082
124.08	0.0119758	0.00561693	0.00927422	0.0127052	0.012007	0.006575	0.008918	0.011872
124.32	0.0120225	0.0055261	0.00943914	0.0130078	0.012117	0.006253	0.00873	0.012095
124.56	0.0120231	0.00582976	0.0095013	0.0125574	0.011651	0.006569	0.00868	0.011733
124.8	0.012077	0.00593928	0.00942862	0.0131459	0.011767	0.006565	0.00908	0.012298
125.04	0.0121768	0.0057091	0.0091871	0.0128944	0.011803	0.006713	0.008777	0.011821
125.28	0.0116522	0.00576794	0.00953413	0.0131268	0.011944	0.006596	0.008789	0.012089
125.52	0.0117566	0.00554068	0.00960966	0.0125454	0.011858	0.006421	0.008613	0.012002
125.76	0.0122934	0.00568078	0.00924678	0.0127402	0.011598	0.006246	0.009013	0.012039
126	0.0117459	0.00536463	0.0093979	0.0128712	0.011966	0.006698	0.008831	0.011743
126.24	0.0118685	0.00563319	0.00918185	0.0131167	0.011723	0.006469	0.009073	0.011573
126.48	0.0116922	0.00558573	0.0092607	0.0130809	0.01199	0.007145	0.009004	0.011447
126.72	0.0119248	0.00582304	0.00947631	0.0124923	0.011914	0.006709	0.008812	0.011958
126.96	0.0120821	0.00572058	0.00945806	0.0125098	0.012396	0.006132	0.009016	0.011892
127.2	0.0117281	0.00547834	0.0094927	0.0133371	0.011686	0.006533	0.00859	0.011412
127.44	0.011541	0.00589577	0.00944143	0.0132705	0.011764	0.006527	0.008621	0.011802
127.68	0.0120628	0.00542605	0.00928153	0.0129474	0.011669	0.006433	0.009196	0.011711
127.92	0.0118842	0.00572713	0.00942984	0.0128392	0.011842	0.006554	0.009001	0.011714
128.16	0.0119165	0.00562569	0.00911127	0.0130724	0.011859	0.006796	0.008683	0.012074
128.4	0.0118286	0.00536463	0.00940848	0.01285	0.012225	0.006773	0.008461	0.011716
128.64	0.0119466	0.00546628	0.00916314	0.0130428	0.012043	0.006566	0.008756	0.011798
128.88	0.012139	0.00580976	0.00949158	0.0128673	0.012656	0.006816	0.008503	0.011944
129.12	0.0117512	0.00559724	0.00929142	0.0131206	0.011784	0.006575	0.0085	0.011946
129.36	0.0121528	0.00585405	0.00903145	0.0125683	0.01203	0.006629	0.009313	0.011981
129.6	0.0119879	0.00565112	0.00957435	0.0129729	0.012014	0.006513	0.008582	0.012051
129.84	0.0121644	0.0056624	0.00965789	0.0128111	0.012023	0.006551	0.008858	0.011681
130.08	0.011698	0.00571627	0.00934277	0.0132861	0.011746	0.006565	0.008659	0.012061
130.32	0.012028	0.0056686	0.00961696	0.0127796	0.012126	0.006648	0.009112	0.012427
130.56	0.0120919	0.00550826	0.00936571	0.012934	0.012236	0.006544	0.009116	0.011818
130.8	0.0119751	0.00561312	0.00937934	0.0131105	0.01213	0.006838	0.008773	0.011848
131.04	0.0117955	0.00571581	0.00949142	0.0133537	0.012562	0.0065	0.008526	0.012187
131.28	0.0119489	0.00552487	0.00936044	0.0129175	0.012116	0.006664	0.009109	0.011799
131.52	0.0123967	0.00541435	0.00956796	0.0131118	0.012118	0.006415	0.008725	0.011876
131.76	0.0121196	0.00562106	0.00950134	0.0134155	0.011567	0.006788	0.009538	0.011996
132	0.0118364	0.00586031	0.00913281	0.0133686	0.011709	0.006842	0.008943	0.011968
132.24	0.0115989	0.00556387	0.00945497	0.012915	0.012024	0.006747	0.008894	0.011771
132.48	0.0120888	0.00570832	0.00940915	0.01238	0.01181	0.006629	0.008986	0.011834
132.72	0.0117015	0.00550545	0.00979431	0.0127674	0.011788	0.006628	0.008922	0.011751
132.96	0.0120228	0.00552735	0.00930816	0.0130376	0.012035	0.006689	0.008949	0.012223
133.2	0.011963	0.00563912	0.00945466	0.012999	0.011906	0.006504	0.008885	0.01198
133.44	0.0117933	0.0053703	0.00947505	0.0133352	0.011977	0.006693	0.009442	0.011869
133.68	0.0120618	0.00564327	0.00930175	0.0134136	0.012377	0.006653	0.009103	0.011482
133.92	0.011718	0.00567415	0.00969997	0.013413	0.011523	0.006628	0.008699	0.011793
134.16	0.0120389	0.00544504	0.00962519	0.013069	0.01196	0.006509	0.008928	0.011569
134.4	0.0120921	0.0056324	0.00934332	0.0130759	0.012163	0.006463	0.009123	0.011721
134.64	0.0121557	0.00550359	0.00939369	0.0132331	0.012208	0.00682	0.009154	0.011924
134.88	0.0118731	0.0053242	0.00962855	0.0129506	0.011846	0.006664	0.009076	0.011777
135.12	0.0117386	0.00580553	0.00958624	0.0131758	0.011676	0.006608	0.009158	0.01163
135.36	0.011806	0.00547875	0.00973924	0.0130727	0.012358	0.00654	0.008896	0.011814
135.6	0.0116885	0.00542002	0.0096505	0.0131089	0.011845	0.006617	0.009063	0.011705
135.84	0.0121463	0.00557089	0.00938484	0.0129128	0.012193	0.006737	0.009117	0.011787
136.08	0.0119069	0.00557476	0.00948623	0.0129719	0.011865	0.006686	0.009239	0.012156
136.32	0.0119579	0.00550188	0.0096409	0.013065	0.012178	0.006505	0.008858	0.011888
136.56	0.0119823	0.00523925	0.00932901	0.0131013	0.012476	0.006367	0.008809	0.012187
136.8	0.011736	0.00579408	0.00969604	0.012908	0.012234	0.006532	0.009133	0.011887
137.04	0.0121188	0.00518803	0.0094633	0.0134036	0.011951	0.006284	0.009095	0.012189
137.28	0.0115794	0.00572443	0.0095323	0.0132964	0.011767	0.006723	0.008923	0.012495
137.52	0.0117861	0.0055818	0.00938149	0.0134027	0.011988	0.006452	0.009002	0.012006
137.76	0.0121324	0.00559662	0.00926818	0.012436	0.011997	0.006531	0.009271	0.01186
138	0.0119582	0.00540148	0.00964884	0.0132403	0.012172	0.006806	0.009016	0.01229
138.24	0.0120251	0.00537024	0.0096908	0.0136236	0.011655	0.006757	0.009147	0.012034
138.48	0.011696	0.00548991	0.00954201	0.0127774	0.011643	0.006668	0.00921	0.011928
138.72	0.0118124	0.00571345	0.00955284	0.0131772	0.012024	0.006787	0.008707	0.011894
138.96	0.0119765	0.00556867	0.00947099	0.0128261	0.011985	0.006654	0.009086	0.011656
139.2	0.0117766	0.00520246	0.00938473	0.013412	0.011693	0.006763	0.009379	0.011696
139.44	0.0120878	0.00553557	0.00935568	0.0133923	0.011531	0.006575	0.008813	0.012508
139.68	0.0116177	0.0053749	0.00946767	0.0133688	0.011985	0.006793	0.008828	0.011861
139.92	0.0116017	0.00522531	0.00972245	0.0129901	0.012241	0.006765	0.009175	0.011719
140.16	0.0116455	0.0054805	0.00969531	0.0131022	0.011966	0.006615	0.008937	0.012084
140.4	0.0117385	0.00572357	0.0095502	0.0133411	0.012208	0.006736	0.009399	0.011787
140.64	0.0120002	0.0054576	0.00961687	0.0128638	0.012189	0.006869	0.008865	0.012067
140.88	0.0116944	0.00564495	0.00948302	0.0130664	0.012087	0.006618	0.009352	0.011818
141.12	0.0120577	0.0057556	0.00950201	0.0132819	0.012059	0.0065	0.009277	0.012396
141.36	0.011718	0.00570322	0.00947447	0.0133005	0.011796	0.006352	0.008752	0.01173
141.6	0.0120307	0.00577467	0.0094951	0.0131202	0.012094	0.006623	0.009006	0.011453
141.84	0.0120927	0.00548158	0.0095751	0.0128229	0.012018	0.006546	0.008943	0.011934
142.08	0.0120765	0.00521044	0.00966713	0.0132852	0.011659	0.00692	0.008909	0.011798
142.32	0.0121612	0.00535901	0.00966436	0.0132451	0.012136	0.006699	0.009414	0.011856
142.56	0.011857	0.00524025	0.00953461	0.0134905	0.011701	0.006569	0.009557	0.012182
142.8	0.0121529	0.00548158	0.0095108	0.0130923	0.011947	0.006683	0.009147	0.011768
143.04	0.0122449	0.00550706	0.00960386	0.0131928	0.012516	0.006437	0.009459	0.011864
143.28	0.0119559	0.00537815	0.00946342	0.0133815	0.012122	0.006612	0.009193	0.012122
143.52	0.0118696	0.00512993	0.00971852	0.0129655	0.012334	0.006798	0.009479	0.012129
143.76	0.0117548	0.00551709	0.00953286	0.0130754	0.012019	0.006535	0.009227	0.011975
144	0.0120335	0.00569866	0.00952389	0.0133108	0.011975	0.00666	0.009097	0.011821
144.24	0.0120182	0.00559857	0.00963676	0.0132588	0.011657	0.006281	0.009013	0.012118
144.48	0.0120187	0.00547929	0.00944345	0.0133076	0.012261	0.006518	0.009068	0.011757
144.72	0.011905	0.00514024	0.00941647	0.013428	0.012074	0.006565	0.009179	0.011852
144.96	0.012042	0.00530796	0.00931363	0.0129311	0.012096	0.007098	0.009324	0.011816
145.2	0.0117175	0.00548145	0.00976613	0.0130476	0.011952	0.006598	0.009283	0.011891
145.44	0.0119942	0.00531272	0.00924356	0.0132167	0.012078	0.006812	0.009102	0.011761
145.68	0.0121079	0.00544959	0.00963932	0.0130904	0.012091	0.006871	0.00914	0.011904
145.92	0.0119065	0.00556664	0.00977439	0.0131793	0.01207	0.006732	0.009335	0.012037
146.16	0.0120538	0.00568591	0.0095644	0.0131711	0.012696	0.006483	0.009004	0.011828
146.4	0.0119484	0.00550131	0.00974532	0.0134211	0.012136	0.006768	0.009425	0.011913
146.64	0.0121198	0.00549172	0.0100359	0.0137231	0.012428	0.006341	0.009197	0.012356
146.88	0.012021	0.00507758	0.00986606	0.013141	0.012437	0.006757	0.009269	0.012183
147.12	0.011983	0.00546943	0.00956824	0.0129543	0.012012	0.006979	0.009222	0.011934
147.36	0.0121813	0.0051348	0.00949541	0.0132115	0.011772	0.006432	0.009498	0.011825
147.6	0.0118062	0.00548592	0.00988823	0.0132146	0.012528	0.0069	0.00945	0.011837
147.84	0.0119098	0.00524503	0.00966092	0.0131421	0.012151	0.006765	0.009081	0.0123
148.08	0.0118419	0.00531256	0.0094574	0.012857	0.012023	0.006715	0.008936	0.011812
148.32	0.0121394	0.00568128	0.00956273	0.0132542	0.012343	0.006477	0.009493	0.011765
148.56	0.0116779	0.00562742	0.00968096	0.0132011	0.012416	0.006558	0.009085	0.011666
148.8	0.0119192	0.00535848	0.00982568	0.0133237	0.0122	0.007035	0.008952	0.011669
149.04	0.0121574	0.00517913	0.00967772	0.0134302	0.012061	0.006621	0.009093	0.012185
149.28	0.0118144	0.00515118	0.00957897	0.0133827	0.012201	0.006523	0.009183	0.011969
149.52	0.0122131	0.00559281	0.00959329	0.0132079	0.012382	0.006611	0.00905	0.012287
149.76	0.0118573	0.00536098	0.00956887	0.0128531	0.012106	0.006803	0.009176	0.012123
150	0.0124317	0.00553571	0.00963821	0.013053	0.011928	0.006994	0.008844	0.011483
150.24	0.0140132	0.0060389	0.0106654	0.013592	0.012154	0.006962	0.008927	0.011818
150.48	0.0153586	0.00645118	0.0121026	0.0146907	0.012157	0.006532	0.008849	0.011823
150.72	0.0164926	0.00700034	0.0128507	0.0138942	0.012317	0.006793	0.009398	0.011551
150.96	0.0173695	0.00772961	0.0134864	0.0145882	0.012234	0.006896	0.009146	0.011603
151.2	0.0191597	0.00824254	0.014594	0.0148688	0.012477	0.006644	0.00942	0.012048
151.44	0.0195836	0.00843588	0.0151653	0.0152881	0.012331	0.006453	0.009253	0.011803
151.68	0.0203003	0.0087913	0.0157327	0.0160416	0.012359	0.006665	0.008934	0.011623
151.92	0.0209478	0.00933074	0.0164944	0.0158617	0.012558	0.006776	0.009099	0.011627
152.16	0.0212736	0.00905921	0.0168404	0.0161999	0.012379	0.006595	0.009349	0.011797
152.4	0.0221009	0.00966153	0.0167262	0.016171	0.012555	0.007047	0.009284	0.012074
152.64	0.0225963	0.00965467	0.0177544	0.0164507	0.012331	0.006866	0.009085	0.012051
152.88	0.0232325	0.0100737	0.0178365	0.0171392	0.012363	0.006943	0.009329	0.011684
153.12	0.0235634	0.00995309	0.0182584	0.0164887	0.012444	0.00692	0.009129	0.012204
153.36	0.024223	0.0104535	0.0185267	0.0169692	0.011622	0.006661	0.009695	0.011961
153.6	0.0241243	0.010593	0.0192726	0.0173542	0.012657	0.006663	0.009511	0.011774
153.84	0.0244794	0.0107856	0.0192305	0.0169128	0.012073	0.006788	0.009603	0.011392
154.08	0.0247866	0.0106866	0.0194813	0.0172459	0.012237	0.006649	0.009329	0.011457
154.32	0.0252257	0.0112349	0.019718	0.0173015	0.012344	0.006863	0.009226	0.011778
154.56	0.0253264	0.011053	0.019672	0.0178234	0.012119	0.006549	0.009204	0.011943
154.8	0.0257965	0.0114569	0.0200448	0.0175696	0.012843	0.006791	0.009226	0.011677
155.04	0.0259489	0.0113918	0.0204622	0.0179216	0.012743	0.006835	0.009348	0.012217
155.28	0.0261153	0.0114844	0.0206697	0.0177712	0.012791	0.006852	0.009143	0.011942
155.52	0.0265681	0.0119754	0.0208226	0.0177805	0.012562	0.006824	0.009288	0.011979
155.76	0.0264134	0.011823	0.0209104	0.0181845	0.012801	0.006799	0.009164	0.011751
156	0.0266866	0.011844	0.0208742	0.0182566	0.012385	0.00681	0.009348	0.011749
156.24	0.0268263	0.011732	0.0213688	0.0182413	0.012278	0.006528	0.009698	0.012046
156.48	0.0271378	0.0119074	0.0211765	0.0182611	0.012678	0.006921	0.009629	0.011639
156.72	0.0272741	0.0123434	0.0215295	0.0182501	0.012409	0.006757	0.009511	0.011884
156.96	0.0278152	0.0122995	0.0218436	0.0181654	0.012294	0.006932	0.009176	0.011999
157.2	0.0277114	0.0124565	0.0218053	0.0179959	0.01272	0.007151	0.009206	0.01208
157.44	0.027481	0.0126581	0.0219254	0.0186853	0.012742	0.007216	0.009256	0.011851
157.68	0.0286218	0.0125451	0.0220014	0.0191692	0.01219	0.007256	0.00956	0.011966
157.92	0.0283766	0.0126494	0.0219836	0.0185486	0.012414	0.006929	0.009613	0.011613
158.16	0.028374	0.0126757	0.0220213	0.0190134	0.011968	0.007052	0.009418	0.012029
158.4	0.0284548	0.0125556	0.0222086	0.0190956	0.012769	0.007072	0.009404	0.012212
158.64	0.0285234	0.0127412	0.0222677	0.0187396	0.012436	0.006976	0.009603	0.011656
158.88	0.0282937	0.0127092	0.0224674	0.018735	0.012389	0.006986	0.009473	0.011612
159.12	0.0286396	0.0130806	0.02279	0.0193622	0.012324	0.00709	0.009622	0.012365
159.36	0.0288039	0.0129274	0.0228101	0.0192183	0.012868	0.006845	0.010185	0.011592
159.6	0.0289735	0.0130467	0.0234686	0.0190608	0.01239	0.00713	0.009631	0.011893
159.84	0.0290332	0.0133649	0.0228687	0.0190389	0.012813	0.007165	0.009202	0.011951
160.08	0.0294008	0.0130924	0.0229382	0.0196078	0.012304	0.007158	0.009666	0.01179
160.32	0.0295416	0.0130997	0.0229888	0.0193264	0.0132	0.007145	0.009651	0.011951
160.56	0.0291049	0.0131206	0.023322	0.0192754	0.012463	0.006879	0.009445	0.011548
160.8	0.0290222	0.0135298	0.0231512	0.0195964	0.012755	0.007256	0.010155	0.012139
161.04	0.0296093	0.0134353	0.0232195	0.0194264	0.012936	0.00709	0.009621	0.011762
161.28	0.0291906	0.0131419	0.0235054	0.019171	0.012476	0.007307	0.009618	0.011972
161.52	0.0298813	0.0133095	0.0233727	0.0196328	0.012475	0.007211	0.009952	0.011973
161.76	0.0300534	0.0134465	0.0235398	0.0196352	0.012874	0.007358	0.009696	0.012018
162	0.0300288	0.0132993	0.0233115	0.0191371	0.013023	0.0073	0.00972	0.012283
162.24	0.0296598	0.0131105	0.0233247	0.0195545	0.012926	0.007114	0.009506	0.011845
162.48	0.0300131	0.0132875	0.0237728	0.0194959	0.012572	0.007294	0.009762	0.011784
162.72	0.0304199	0.0135605	0.0240153	0.0191699	0.012663	0.00743	0.00957	0.011802
162.96	0.0303726	0.0136297	0.0236858	0.0192731	0.012752	0.007344	0.009426	0.01194
163.2	0.030851	0.0134619	0.0238413	0.0195314	0.012149	0.007333	0.009872	0.012059
163.44	0.0303963	0.013378	0.0237563	0.0192408	0.012756	0.007194	0.009402	0.012107
163.68	0.0301148	0.0132595	0.0237703	0.0193978	0.012471	0.007339	0.009892	0.011529
163.92	0.030128	0.0132722	0.0243695	0.0195289	0.012887	0.007214	0.010024	0.012149
164.16	0.0299119	0.0136521	0.0241034	0.0195901	0.012942	0.007391	0.009856	0.011501
164.4	0.03049	0.013834	0.0241829	0.0186937	0.013047	0.007498	0.009714	0.011942
164.64	0.0308482	0.0135878	0.0238908	0.0197153	0.013102	0.007856	0.009609	0.01184
164.88	0.0311275	0.0138564	0.024053	0.0194625	0.012623	0.007226	0.009928	0.012274
165.12	0.0309994	0.0140116	0.0240081	0.0194064	0.012676	0.007582	0.009852	0.011698
165.36	0.0307249	0.0135149	0.0244066	0.0190675	0.012548	0.00742	0.010099	0.011708
165.6	0.0303099	0.0138659	0.0239522	0.0197156	0.012653	0.007562	0.009904	0.011632
165.84	0.0314121	0.0138867	0.0245685	0.0201187	0.012903	0.007447	0.009859	0.012101
166.08	0.0311415	0.0136651	0.0242613	0.0197313	0.012878	0.00746	0.009667	0.012021
166.32	0.0308613	0.0137061	0.0244445	0.0194576	0.012725	0.007318	0.009795	0.011854
166.56	0.0312623	0.0137788	0.0245032	0.0200025	0.012619	0.007498	0.009761	0.011747
166.8	0.0314265	0.0138904	0.0245829	0.0193087	0.013111	0.007684	0.010202	0.011893
167.04	0.0313686	0.0137882	0.0245518	0.0194613	0.012858	0.007446	0.009531	0.012002
167.28	0.0300373	0.0135686	0.0244008	0.0192167	0.012434	0.00757	0.009772	0.012037
167.52	0.0308677	0.0133884	0.0245471	0.0196438	0.012848	0.007418	0.009835	0.012043
167.76	0.0309193	0.0135717	0.0244274	0.0195973	0.012681	0.007416	0.009827	0.011792
168	0.0309819	0.0135063	0.0244776	0.01963	0.012794	0.007617	0.010318	0.012134
168.24	0.0313594	0.0134041	0.0245474	0.0197344	0.01313	0.007625	0.009739	0.011995
168.48	0.0317216	0.0138953	0.0246707	0.0197365	0.013125	0.007666	0.010195	0.011997
168.72	0.0316778	0.0137318	0.0248631	0.0193964	0.012961	0.007646	0.009865	0.011959
168.96	0.0312806	0.0137421	0.0247039	0.0195925	0.01273	0.007789	0.009913	0.012078
169.2	0.0316729	0.0136381	0.0247335	0.0194675	0.012516	0.007897	0.010083	0.011817
169.44	0.0318083	0.0136249	0.0249431	0.0195407	0.012936	0.007664	0.00984	0.011944
169.68	0.0312543	0.0137213	0.0246455	0.0196268	0.01259	0.007614	0.010002	0.011675
169.92	0.0319051	0.0139349	0.0246488	0.0198841	0.012779	0.0078	0.010087	0.011614
170.16	0.0318371	0.0139037	0.0249908	0.0200371	0.012905	0.007585	0.010037	0.012189
170.4	0.0316837	0.0135399	0.025225	0.0188855	0.012752	0.007671	0.009886	0.012045
170.64	0.0317338	0.0139809	0.0249061	0.0201723	0.012656	0.007908	0.010046	0.011816
170.88	0.0316275	0.0141741	0.0248625	0.0195646	0.012831	0.007823	0.009943	0.011684
171.12	0.0322103	0.0139476	0.025081	0.0197623	0.012922	0.007743	0.00991	0.012099
171.36	0.0321396	0.013737	0.0248361	0.0197677	0.012723	0.007725	0.010066	0.012352
171.6	0.0311943	0.0138562	0.0247349	0.0194931	0.012806	0.007735	0.009613	0.011684
171.84	0.0315488	0.0138549	0.0253499	0.0190535	0.012745	0.007517	0.01011	0.011731
172.08	0.0318017	0.0136898	0.0245834	0.0195934	0.012854	0.007729	0.010204	0.012128
172.32	0.0322586	0.0138369	0.0247035	0.0197748	0.01298	0.00771	0.009715	0.012042
172.56	0.0318605	0.0136175	0.0249502	0.0198279	0.012709	0.007773	0.00994	0.012106
172.8	0.0320739	0.0137832	0.0249737	0.0197982	0.013007	0.007679	0.009974	0.011958
173.04	0.0322272	0.0136786	0.0254891	0.0196972	0.012527	0.007705	0.009974	0.012084
173.28	0.0319761	0.0138782	0.0248565	0.0196379	0.013305	0.007776	0.009711	0.012208
173.52	0.0317814	0.0136791	0.0250321	0.0193128	0.012963	0.007761	0.010386	0.012231
173.76	0.031683	0.0139742	0.024969	0.0200415	0.012543	0.00767	0.010297	0.011854
174	0.0318295	0.0141431	0.0245585	0.0194789	0.0131	0.008074	0.010205	0.012132
174.24	0.0321403	0.0141921	0.0253339	0.0194235	0.012885	0.007943	0.009937	0.012071
174.48	0.0320718	0.0138531	0.0248026	0.0198357	0.013215	0.007663	0.010047	0.012181
174.72	0.0323457	0.0139251	0.0251819	0.019389	0.012521	0.007983	0.009845	0.012235
174.96	0.0321838	0.0138278	0.0254261	0.019291	0.012765	0.007866	0.010159	0.011424
175.2	0.0323609	0.0138344	0.0251898	0.0196877	0.012865	0.007872	0.009814	0.011947
175.44	0.0322763	0.0135354	0.0251521	0.0192226	0.012592	0.00819	0.009775	0.011879
175.68	0.032472	0.0138508	0.025008	0.0193373	0.013011	0.008079	0.01008	0.012106
175.92	0.0325194	0.0139212	0.0248385	0.0192837	0.012939	0.007669	0.01026	0.012121
176.16	0.0325056	0.01418	0.0253332	0.0191365	0.012994	0.007808	0.009931	0.012025
176.4	0.0323811	0.0136785	0.0251372	0.0198319	0.012726	0.007797	0.010561	0.011954
176.64	0.0325245	0.0137622	0.0252042	0.0191525	0.012801	0.008123	0.01038	0.011707
176.88	0.0324724	0.0136418	0.0251113	0.0191906	0.012787	0.008119	0.010056	0.01196
177.12	0.0324878	0.0139168	0.0247473	0.019706	0.012932	0.007997	0.010021	0.012237
177.36	0.0325802	0.0142012	0.024949	0.0192977	0.013096	0.007956	0.010239	0.011843
177.6	0.0320519	0.0138424	0.0254025	0.019337	0.012686	0.007874	0.010163	0.012046
177.84	0.0322123	0.0137814	0.0252763	0.018979	0.013192	0.008028	0.009818	0.01181
178.08	0.0324708	0.0138323	0.0250001	0.0196638	0.01267	0.008146	0.010155	0.011752
178.32	0.0322385	0.0137751	0.0251826	0.0193933	0.012997	0.008059	0.010054	0.012204
178.56	0.0324852	0.0136416	0.0250533	0.0188688	0.013151	0.00782	0.010288	0.011994
178.8	0.0329744	0.0138287	0.0250029	0.0194396	0.012794	0.008251	0.010364	0.011905
179.04	0.0327592	0.0138131	0.0251354	0.0188897	0.013197	0.007864	0.010022	0.012191
179.28	0.0324013	0.0138511	0.0253463	0.0195463	0.012885	0.008008	0.010199	0.012013
179.52	0.0325045	0.013952	0.0251634	0.0197725	0.013011	0.008068	0.010136	0.011839
179.76	0.0323906	0.0137931	0.025132	0.0184259	0.012944	0.008193	0.010023	0.011384
180	0.0326998	0.0138646	0.0253193	0.0194262	0.012931	0.008137	0.010519	0.01167
180.24	0.0325631	0.013975	0.0253412	0.0187842	0.013438	0.0081	0.010156	0.012076
180.48	0.033061	0.0138992	0.0248593	0.0195329	0.012839	0.008298	0.010404	0.011709
180.72	0.0323865	0.0137212	0.0248823	0.0195298	0.013012	0.008146	0.010227	0.011955
180.96	0.0326293	0.0139704	0.0250091	0.019544	0.012696	0.008134	0.010408	0.011649
181.2	0.0323426	0.0138598	0.0247803	0.0188273	0.012973	0.008031	0.010017	0.011958
181.44	0.032652	0.0137032	0.0254839	0.0189581	0.013316	0.007811	0.010372	0.011851
181.68	0.0330794	0.0138401	0.0255751	0.0198577	0.012739	0.007967	0.010572	0.011974
181.92	0.0327478	0.0138122	0.0250498	0.0195088	0.013226	0.008143	0.010202	0.012188
182.16	0.0327898	0.0138591	0.0252327	0.019164	0.013361	0.008075	0.01004	0.011977
182.4	0.0328005	0.0135911	0.0253853	0.0195564	0.013079	0.008257	0.010311	0.011585
182.64	0.0327641	0.0137422	0.0254937	0.0194005	0.012955	0.008013	0.009977	0.011461
182.88	0.0327978	0.0136738	0.0253512	0.0189239	0.01288	0.008553	0.010141	0.012119
183.12	0.0324154	0.0138208	0.0252988	0.0190333	0.013219	0.008206	0.009994	0.011665
183.36	0.0324733	0.0130986	0.0255241	0.0199896	0.012871	0.008294	0.010281	0.011827
183.6	0.0332228	0.0137112	0.0250944	0.0187765	0.012477	0.008346	0.01049	0.012353
183.84	0.0329558	0.0136235	0.0249144	0.0190499	0.012893	0.008374	0.010196	0.012197
184.08	0.0327649	0.0135947	0.0255778	0.019498	0.012642	0.008439	0.010385	0.011782
184.32	0.0331276	0.0136121	0.0253664	0.0192113	0.012949	0.008151	0.01039	0.011513
184.56	0.032996	0.0137899	0.0252818	0.0192581	0.013132	0.00778	0.010191	0.012145
184.8	0.033048	0.0136999	0.025122	0.0190747	0.013227	0.008349	0.010416	0.011912
185.04	0.0329955	0.0135853	0.0252804	0.0190973	0.013249	0.008368	0.009905	0.011624
185.28	0.0333692	0.0140363	0.0253687	0.019339	0.013149	0.008318	0.010694	0.012161
185.52	0.0327803	0.013523	0.0252254	0.0190652	0.013217	0.008286	0.01043	0.011801
185.76	0.0330985	0.0135522	0.0252337	0.0189987	0.013091	0.008201	0.009889	0.011843
186	0.0326859	0.0135329	0.0254072	0.0189119	0.013071	0.008236	0.010154	0.011817
186.24	0.0329668	0.013758	0.0253438	0.0191458	0.012999	0.00811	0.010313	0.012008
186.48	0.0328996	0.0133423	0.0250467	0.0191309	0.01301	0.008118	0.00997	0.011902
186.72	0.0330087	0.0133119	0.0251586	0.0189182	0.013019	0.008286	0.010328	0.01206
186.96	0.032861	0.0135947	0.0248679	0.0190637	0.013464	0.008543	0.009967	0.012168
187.2	0.0333684	0.0133839	0.0253997	0.0190116	0.0132	0.008389	0.010418	0.011716
187.44	0.0333261	0.0138884	0.0251888	0.0187155	0.013631	0.008435	0.010159	0.011971
187.68	0.0327467	0.0135386	0.025378	0.0185004	0.013149	0.008025	0.010033	0.01202
187.92	0.032639	0.0137965	0.0253139	0.0186787	0.013743	0.008176	0.010127	0.012071
188.16	0.0329106	0.0136048	0.0256803	0.0191433	0.013238	0.008267	0.01079	0.011718
188.4	0.0329474	0.0132988	0.0253136	0.0189063	0.013179	0.00827	0.010428	0.011709
188.64	0.0327924	0.0130994	0.0252632	0.0190867	0.013258	0.008498	0.010619	0.011733
188.88	0.0328554	0.0135819	0.0254531	0.0193222	0.01264	0.008069	0.010112	0.011945
189.12	0.0340229	0.0133483	0.0251968	0.0187982	0.012847	0.008499	0.0105	0.011836
189.36	0.0333665	0.013275	0.0251926	0.0189996	0.013111	0.008622	0.01033	0.012081
189.6	0.0331661	0.0134601	0.0250327	0.0189138	0.013019	0.008321	0.009907	0.012018
189.84	0.0331571	0.0133614	0.0251276	0.0189815	0.013255	0.008324	0.010346	0.0123
190.08	0.0329432	0.0135484	0.0249967	0.0188736	0.013624	0.008469	0.009942	0.011966
190.32	0.0325901	0.0133216	0.0251625	0.0188447	0.01295	0.008373	0.010182	0.011843
190.56	0.0329021	0.0135941	0.0254134	0.0185917	0.012823	0.008357	0.010265	0.011854
190.8	0.0333408	0.0134792	0.0251562	0.0185902	0.012915	0.008348	0.010405	0.011969
191.04	0.0334112	0.013481	0.0252199	0.0188884	0.013431	0.008488	0.010184	0.011495
191.28	0.033115	0.0131629	0.0251963	0.0189844	0.013298	0.008461	0.010123	0.011693
191.52	0.032964	0.0134717	0.0251759	0.0188333	0.013382	0.008617	0.010513	0.011732
191.76	0.0329181	0.0135493	0.0251937	0.0191351	0.012949	0.00841	0.010054	0.011695
192	0.032911	0.0135566	0.0252146	0.0190758	0.01333	0.008104	0.010556	0.011806
192.24	0.0331048	0.0131202	0.0250537	0.018825	0.013005	0.008336	0.010325	0.011602
192.48	0.033009	0.0131492	0.0251886	0.0188226	0.013397	0.008445	0.010374	0.011661
192.72	0.0333119	0.0133915	0.0250144	0.0188351	0.012997	0.008305	0.01011	0.011926
192.96	0.0336094	0.0135045	0.0251386	0.0191687	0.013194	0.008748	0.010074	0.012238
193.2	0.0331654	0.0132874	0.0252427	0.0190809	0.01299	0.008368	0.010417	0.012308
193.44	0.0326478	0.0132238	0.0249633	0.0186221	0.013216	0.008344	0.010602	0.011871
193.68	0.0327445	0.0131989	0.0250965	0.0186982	0.013601	0.008684	0.010626	0.011851
193.92	0.0332248	0.0134081	0.0252977	0.0186761	0.013199	0.008616	0.010191	0.011834
194.16	0.0332633	0.0134316	0.0248336	0.0184641	0.013176	0.008743	0.009756	0.01161
194.4	0.0335256	0.0133771	0.0252458	0.0189524	0.012992	0.008545	0.010081	0.01143
194.64	0.0330813	0.0132867	0.0248713	0.0181925	0.012957	0.008522	0.010172	0.012099
194.88	0.0331844	0.0134494	0.0254076	0.0187551	0.013179	0.00826	0.010227	0.011795
195.12	0.0329352	0.013245	0.0250584	0.0184162	0.012869	0.008542	0.010236	0.012057
195.36	0.0332443	0.0132398	0.0254536	0.0185131	0.013583	0.008784	0.010593	0.011617
195.6	0.0330815	0.0133226	0.0251056	0.0181385	0.013438	0.008488	0.010567	0.011895
195.84	0.0334032	0.0135773	0.0255238	0.0183489	0.013476	0.00828	0.010514	0.011503
196.08	0.0336537	0.0133927	0.0253405	0.0190806	0.013073	0.008394	0.010486	0.011675
196.32	0.0335756	0.0131135	0.0252204	0.0189673	0.013092	0.008626	0.010305	0.011603
196.56	0.0332015	0.01361	0.0252143	0.0190697	0.013434	0.008501	0.010159	0.011719
196.8	0.0332307	0.0133081	0.02514	0.0184466	0.012793	0.008608	0.010693	0.011724
197.04	0.032869	0.0133907	0.0251719	0.0185325	0.013184	0.00842	0.010407	0.011704
197.28	0.0335955	0.013757	0.0247698	0.0184805	0.013005	0.008489	0.010493	0.011943
197.52	0.0333925	0.0133918	0.0252068	0.0182478	0.013074	0.008465	0.010603	0.012054
197.76	0.0332444	0.0129872	0.0250561	0.0180497	0.013411	0.008888	0.01051	0.011954
198	0.0332184	0.0131534	0.0251622	0.0183249	0.01335	0.008621	0.010507	0.011887
198.24	0.0333425	0.0131458	0.0249417	0.0185335	0.013171	0.008794	0.01001	0.01188
198.48	0.0334296	0.0132443	0.0254316	0.0188071	0.0137	0.008449	0.01021	0.011868
198.72	0.0329609	0.013035	0.0251702	0.0188134	0.013166	0.008316	0.010288	0.01158
198.96	0.0331344	0.013222	0.0250832	0.0182476	0.013444	0.00859	0.010449	0.011702
199.2	0.0331547	0.0131029	0.0248743	0.0184714	0.012695	0.008825	0.010596	0.011819
199.44	0.0333022	0.0130294	0.0247649	0.0182903	0.013012	0.00867	0.010569	0.011986
199.68	0.0333838	0.0132597	0.0251315	0.0180512	0.013196	0.008508	0.010447	0.011679
199.92	0.0334099	0.0128431	0.0249603	0.0181534	0.012862	0.008389	0.010371	0.011906
200.16	0.0338027	0.012855	0.0247828	0.0181731	0.013439	0.008672	0.010083	0.012368
200.4	0.0333702	0.0132876	0.0252319	0.0186693	0.013556	0.008443	0.010475	0.012035
200.64	0.0334954	0.0131184	0.0248018	0.0178783	0.013097	0.00893	0.010295	0.011801
200.88	0.03352	0.0133378	0.0254888	0.0181982	0.013032	0.008326	0.010564	0.01191
201.12	0.0334079	0.0131261	0.0251863	0.0175703	0.013276	0.008338	0.010444	0.012139
201.36	0.0336176	0.0135382	0.0252413	0.0186003	0.013003	0.008595	0.010178	0.012046
201.6	0.032896	0.0131759	0.0251281	0.0181576	0.013145	0.008764	0.010562	0.011924
201.84	0.0333114	0.0130075	0.0251348	0.0185247	0.012852	0.008332	0.010462	0.011573
202.08	0.0331906	0.0128971	0.0248313	0.018452	0.013118	0.00855	0.010536	0.011932
202.32	0.0331129	0.0128989	0.0248929	0.0185273	0.01314	0.008452	0.010398	0.011879
202.56	0.0333331	0.0131637	0.024907	0.0181002	0.013772	0.008589	0.010608	0.011574
202.8	0.0331491	0.0131595	0.0251479	0.0178796	0.013022	0.008567	0.01051	0.011961
203.04	0.0333751	0.0129249	0.0249829	0.0176763	0.013114	0.008485	0.010485	0.012094
203.28	0.0336953	0.013238	0.0249492	0.0183716	0.012887	0.008441	0.009989	0.01218
203.52	0.0335354	0.0129881	0.025028	0.018562	0.012996	0.008642	0.010406	0.011698
203.76	0.0329341	0.0128916	0.024764	0.0185633	0.012989	0.008983	0.010254	0.011715
204	0.0333553	0.0131033	0.0248836	0.0181068	0.013461	0.008787	0.010289	0.011961
204.24	0.0334681	0.0129821	0.0248321	0.0178142	0.013285	0.008577	0.010317	0.011787
204.48	0.0332909	0.0133752	0.0251312	0.0184223	0.012752	0.008648	0.010367	0.011954
204.72	0.0332569	0.0130896	0.0251207	0.0180004	0.013232	0.008738	0.010149	0.011591
204.96	0.0333544	0.0131448	0.0248617	0.0184834	0.013152	0.008833	0.010355	0.011927
205.2	0.0335973	0.0133702	0.0246834	0.0178504	0.013112	0.008638	0.010664	0.011849
205.44	0.0331587	0.0129096	0.0249244	0.0176327	0.012758	0.008842	0.010955	0.011461
205.68	0.0333001	0.0130557	0.0248702	0.0178968	0.012997	0.00872	0.010177	0.011751
205.92	0.0334796	0.0131456	0.0250929	0.0177202	0.013255	0.00848	0.010046	0.01179
206.16	0.0330372	0.0130638	0.0246467	0.0177041	0.013361	0.008717	0.010314	0.012002
206.4	0.0332405	0.0128755	0.0251289	0.0183886	0.013566	0.008528	0.010287	0.011631
206.64	0.0334376	0.0128545	0.0249229	0.0175683	0.013115	0.008366	0.010457	0.011799
206.88	0.0333005	0.0127053	0.0247157	0.0179712	0.013296	0.008515	0.010914	0.011528
207.12	0.0336475	0.0126488	0.0251336	0.0183705	0.013057	0.008698	0.010178	0.011838
207.36	0.0333552	0.0128164	0.0251574	0.0181138	0.013344	0.008705	0.010666	0.011535
207.6	0.0334905	0.0128432	0.0249523	0.0180037	0.013351	0.008653	0.01049	0.011552
207.84	0.0333157	0.012883	0.0249084	0.0180366	0.012959	0.008754	0.010511	0.011847
208.08	0.0329143	0.0131146	0.0250561	0.0179247	0.012967	0.008744	0.010313	0.011876
208.32	0.0334007	0.0131305	0.0250004	0.0175018	0.013447	0.008663	0.010561	0.011889
208.56	0.0332151	0.0127317	0.0250386	0.0180904	0.013168	0.008576	0.010487	0.011514
208.8	0.0336361	0.0128738	0.0245893	0.0177549	0.01283	0.008603	0.010741	0.011756
209.04	0.0336246	0.0129595	0.0252119	0.0182138	0.013245	0.008558	0.010417	0.012069
209.28	0.032875	0.0124828	0.0242931	0.0181193	0.013223	0.008663	0.010576	0.011982
209.52	0.0327318	0.0125025	0.0251103	0.0183096	0.012967	0.008529	0.01031	0.011825
209.76	0.0331422	0.0125994	0.024637	0.0178741	0.013376	0.008729	0.010277	0.011509
210	0.0332052	0.0127694	0.0246426	0.0176613	0.012933	0.008683	0.010291	0.011277
210.24	0.0331258	0.0127245	0.0246573	0.0179125	0.013335	0.008973	0.010736	0.011894
210.48	0.0331369	0.0128358	0.0246957	0.0178492	0.01338	0.008877	0.01041	0.011839
210.72	0.0330536	0.0127688	0.0244601	0.0178169	0.013272	0.008771	0.010223	0.012041
210.96	0.0335424	0.0127694	0.0245305	0.0178479	0.01296	0.008711	0.01024	0.011871
211.2	0.0334799	0.0126266	0.0245354	0.0183987	0.013041	0.008945	0.010362	0.011521
211.44	0.0330436	0.0123735	0.0246841	0.0179725	0.013426	0.009049	0.010563	0.011997
211.68	0.0327544	0.0132767	0.0246686	0.0176443	0.013224	0.008986	0.010404	0.011775
211.92	0.0329012	0.0123915	0.0248404	0.0178703	0.013483	0.009008	0.010408	0.012077
212.16	0.0331268	0.0128675	0.0242492	0.0171522	0.013379	0.008854	0.010734	0.011555
212.4	0.0337929	0.0122733	0.024794	0.0181713	0.012923	0.008739	0.01039	0.011595
212.64	0.0332191	0.0125803	0.0246554	0.0179411	0.013564	0.008812	0.010636	0.011725
212.88	0.033252	0.0124641	0.0243943	0.0176921	0.01298	0.008803	0.010291	0.011714
213.12	0.0329143	0.012579	0.0247475	0.0172043	0.0131	0.008839	0.010526	0.011726
213.36	0.0330678	0.0125206	0.0248565	0.0172974	0.013073	0.008904	0.01045	0.011625
213.6	0.0335394	0.0125514	0.0247198	0.0180555	0.012999	0.008862	0.009977	0.011664
213.84	0.0337805	0.0127741	0.0247214	0.0177557	0.013328	0.008799	0.010492	0.011798
214.08	0.033633	0.0126305	0.0244763	0.0177894	0.013072	0.00863	0.010361	0.012007
214.32	0.0331095	0.0126066	0.0242817	0.017623	0.013442	0.008701	0.010403	0.011772
214.56	0.033419	0.0125941	0.0244081	0.0181551	0.012942	0.00914	0.010158	0.011775
214.8	0.0332405	0.0126649	0.0247371	0.0176736	0.012916	0.008808	0.010517	0.011708
215.04	0.0334696	0.0127725	0.0248826	0.0180428	0.013147	0.00893	0.010558	0.011704
215.28	0.0332943	0.0125473	0.0244714	0.0177349	0.013223	0.008936	0.010223	0.011593
215.52	0.0329868	0.0125984	0.0244641	0.0179512	0.01345	0.008802	0.010432	0.011714
215.76	0.0332469	0.012774	0.0242651	0.0174927	0.012662	0.008793	0.010478	0.011696
216	0.033318	0.0126223	0.024451	0.0179457	0.012878	0.008987	0.010244	0.011801
216.24	0.0334116	0.0125802	0.024788	0.0178587	0.013025	0.008959	0.010679	0.011543
216.48	0.0329235	0.0124597	0.0246927	0.0174444	0.013413	0.008911	0.010498	0.011504
216.72	0.0332841	0.012881	0.0247051	0.0174928	0.013062	0.008858	0.010675	0.011675
216.96	0.032792	0.0123538	0.0245879	0.0174401	0.013463	0.008754	0.010457	0.011653
217.2	0.0329565	0.0129925	0.0240927	0.0176532	0.012862	0.008975	0.010718	0.011483
217.44	0.0329317	0.0124168	0.0246009	0.0175671	0.013419	0.008836	0.00999	0.011964
217.68	0.033069	0.0127011	0.0243481	0.0174935	0.01304	0.008794	0.010089	0.011683
217.92	0.0333339	0.01215	0.0245901	0.0177111	0.013045	0.00883	0.010385	0.012056
218.16	0.033335	0.012348	0.0246051	0.0176876	0.013127	0.008943	0.010201	0.011451
218.4	0.0328599	0.0125523	0.0244093	0.0170561	0.012574	0.00903	0.010314	0.011945
218.64	0.0331342	0.0126931	0.0247681	0.0173636	0.013624	0.008919	0.010407	0.011815
218.88	0.0328125	0.012386	0.0244278	0.018129	0.013179	0.008764	0.010367	0.011558
219.12	0.0334206	0.0123661	0.0245259	0.0176632	0.01261	0.008857	0.010683	0.011482
219.36	0.0329417	0.0127273	0.0244107	0.0178703	0.013078	0.008913	0.010667	0.011644
219.6	0.0329334	0.0123776	0.0243733	0.0177433	0.013132	0.008737	0.010317	0.011793
219.84	0.0332551	0.0121486	0.0245239	0.0173729	0.012645	0.008804	0.010266	0.011669
220.08	0.0333584	0.0122871	0.0241887	0.0175123	0.013107	0.008945	0.010612	0.011509
220.32	0.0327276	0.0125685	0.0243351	0.0176408	0.012752	0.008833	0.010131	0.011768
220.56	0.0330552	0.0124074	0.0242191	0.0175161	0.013182	0.009002	0.010317	0.011876
220.8	0.0331962	0.0121588	0.0244003	0.0176435	0.013029	0.008469	0.010662	0.011911
221.04	0.0331107	0.0123553	0.0244035	0.0177921	0.013418	0.008771	0.010687	0.011533
221.28	0.0331628	0.0123114	0.024211	0.0174961	0.012939	0.009021	0.010429	0.012044
221.52	0.0331751	0.0122293	0.0241214	0.0173749	0.013103	0.008803	0.009937	0.012082
221.76	0.0331008	0.0124075	0.0245128	0.0173236	0.012686	0.008602	0.01062	0.01155
222	0.0327375	0.0122099	0.0242067	0.0177518	0.013305	0.008661	0.010375	0.011475
222.24	0.0328763	0.0123844	0.0242436	0.017573	0.013117	0.008773	0.010525	0.011715
222.48	0.0331359	0.0123195	0.0243256	0.0170523	0.013185	0.008911	0.010455	0.011671
222.72	0.0332849	0.0123038	0.0243601	0.0172934	0.013735	0.008942	0.010313	0.011572
222.96	0.0332434	0.0123663	0.0242167	0.0172062	0.013375	0.008863	0.010283	0.012023
223.2	0.0329327	0.0122698	0.0243765	0.0177003	0.013593	0.008742	0.010764	0.011815
223.44	0.0327058	0.0121191	0.0238429	0.017641	0.013382	0.008768	0.010195	0.011655
223.68	0.0324668	0.0124253	0.0241973	0.0173229	0.013003	0.008833	0.010227	0.011361
223.92	0.0331378	0.0120462	0.0244765	0.0174215	0.012905	0.008906	0.010456	0.011745
224.16	0.0331191	0.0122342	0.024304	0.0178137	0.013307	0.008846	0.010169	0.011674
224.4	0.0333385	0.0122929	0.0236465	0.0176583	0.013528	0.008844	0.010668	0.011519
224.64	0.0328461	0.0120517	0.0242318	0.0172654	0.013568	0.008802	0.010474	0.011693
224.88	0.033437	0.0120369	0.0238927	0.0171584	0.013321	0.008793	0.010324	0.011504
225.12	0.0331383	0.0123879	0.0243705	0.0171661	0.013081	0.008939	0.010201	0.012003
225.36	0.0332738	0.0122648	0.0240278	0.0175189	0.01293	0.008777	0.010198	0.011326
225.6	0.0328003	0.0121701	0.0240552	0.0174698	0.013125	0.008812	0.010045	0.011817
225.84	0.0331065	0.0123136	0.0243352	0.0171947	0.013396	0.008798	0.010347	0.012018
226.08	0.0328113	0.0124129	0.0242454	0.0171526	0.013023	0.008901	0.010336	0.011326
226.32	0.0328214	0.0121813	0.0239231	0.0172794	0.013177	0.008986	0.010354	0.011449
226.56	0.0327896	0.0123946	0.0242357	0.0165932	0.012991	0.008944	0.010625	0.011425
226.8	0.0330292	0.0122162	0.0239535	0.0172814	0.012872	0.008909	0.010216	0.011351
227.04	0.0329807	0.0121903	0.0241058	0.0168172	0.012766	0.009102	0.010374	0.011667
227.28	0.0329742	0.01206	0.0240679	0.017588	0.013013	0.009162	0.010421	0.011504
227.52	0.032968	0.0119479	0.0243931	0.0169379	0.012874	0.008824	0.010379	0.011416
227.76	0.03335	0.0121354	0.0241431	0.0174267	0.01332	0.008976	0.010442	0.011826
228	0.0331237	0.0123667	0.0239783	0.0169977	0.013147	0.00871	0.010173	0.011292
228.24	0.0326787	0.0120766	0.0243214	0.0170942	0.01269	0.008924	0.010359	0.011319
228.48	0.0330036	0.0119061	0.0239583	0.0170133	0.012882	0.008459	0.010694	0.011332
228.72	0.0327486	0.0120661	0.0238751	0.0171169	0.013654	0.00896	0.010525	0.011768
228.96	0.0325342	0.0120318	0.0241125	0.0172443	0.013265	0.009076	0.010729	0.011651
229.2	0.0329883	0.0123348	0.0246169	0.0167519	0.013344	0.008745	0.010343	0.011583
229.44	0.0332479	0.0123887	0.0239456	0.0167909	0.013154	0.009015	0.010593	0.011322
229.68	0.0325195	0.0124014	0.0240571	0.0175324	0.013216	0.008759	0.010568	0.011301
229.92	0.0328738	0.0122809	0.02395	0.0169594	0.013309	0.008937	0.01042	0.011832
230.16	0.0327877	0.0118806	0.0239718	0.017315	0.013385	0.00885	0.010408	0.011578
230.4	0.0324911	0.0121157	0.0237405	0.0173014	0.013064	0.008999	0.010488	0.011648
230.64	0.0329494	0.0119955	0.0240001	0.0171858	0.012949	0.008937	0.010328	0.012041
230.88	0.0326268	0.0119662	0.0243026	0.0170652	0.013156	0.008896	0.010503	0.011593
231.12	0.0325624	0.0123592	0.024151	0.0173687	0.013022	0.008895	0.010717	0.011581
231.36	0.0325972	0.0123347	0.0236607	0.016913	0.01313	0.008904	0.010659	0.011847
231.6	0.0328939	0.0120448	0.0239291	0.0170084	0.013561	0.008933	0.010708	0.011164
231.84	0.0327329	0.0122003	0.0240445	0.0168365	0.012782	0.008964	0.010835	0.011475
232.08	0.0324543	0.0117871	0.0238867	0.0170676	0.013291	0.008968	0.01066	0.011506
232.32	0.0330287	0.0122311	0.0239443	0.0165548	0.013548	0.008888	0.010578	0.011615
232.56	0.0329089	0.0121128	0.0242061	0.0175268	0.013155	0.009006	0.010218	0.011505
232.8	0.0330495	0.0119876	0.0237222	0.016918	0.013327	0.009013	0.010316	0.011448
233.04	0.0330273	0.0118406	0.024028	0.0168459	0.013242	0.00909	0.010199	0.011365
233.28	0.0330267	0.012097	0.0239346	0.0171283	0.013246	0.009043	0.010747	0.011472
233.52	0.0331883	0.0117686	0.0238845	0.0168872	0.013136	0.008756	0.01025	0.011834
233.76	0.0328624	0.0120407	0.0237532	0.0172076	0.012982	0.009038	0.010669	0.011617
234	0.0332428	0.011753	0.0237418	0.0169227	0.012706	0.008626	0.010228	0.011485
234.24	0.0327003	0.0120729	0.0241348	0.0168642	0.013285	0.008873	0.010365	0.011933
234.48	0.0332575	0.0121228	0.0238984	0.0170853	0.012801	0.008923	0.010549	0.011332
234.72	0.0330882	0.0118405	0.0236267	0.0165694	0.013178	0.008571	0.010518	0.011396
234.96	0.0322424	0.0119517	0.0236738	0.0168296	0.013175	0.008976	0.01037	0.011465
235.2	0.0326065	0.0119252	0.0237123	0.0168934	0.01319	0.009005	0.009917	0.011176
235.44	0.0327952	0.0116803	0.0237846	0.0169343	0.013511	0.008791	0.010537	0.01171
235.68	0.0325215	0.0118863	0.0238665	0.0173921	0.012991	0.008799	0.010433	0.011543
235.92	0.0327867	0.0120878	0.0239787	0.0169881	0.01318	0.009181	0.010376	0.011542
236.16	0.0325228	0.0119826	0.02341	0.0173529	0.013005	0.009117	0.010471	0.011523
236.4	0.0329261	0.0120181	0.0235287	0.0170307	0.013139	0.00911	0.010546	0.011473
236.64	0.0331131	0.0120249	0.0237323	0.0172243	0.013211	0.008911	0.010263	0.011619
236.88	0.0330286	0.0118902	0.0237983	0.016629	0.013514	0.008645	0.010145	0.011163
237.12	0.0328401	0.0116323	0.0235119	0.0166253	0.013582	0.008844	0.010484	0.011639
237.36	0.0324422	0.0122534	0.0240123	0.0168848	0.013043	0.009044	0.010001	0.011367
237.6	0.0328662	0.0117602	0.0237413	0.0170177	0.013317	0.008794	0.010218	0.011493
237.84	0.0332393	0.0120774	0.0235449	0.0169165	0.012819	0.008672	0.010777	0.01158
238.08	0.0327216	0.0118576	0.0237275	0.0169804	0.012886	0.008885	0.009853	0.011366
238.32	0.033033	0.0115588	0.0235909	0.0167846	0.013169	0.009132	0.010629	0.011585
238.56	0.032035	0.0117334	0.0237014	0.0164429	0.013041	0.00878	0.010581	0.01169
238.8	0.0329574	0.0118924	0.0239135	0.0165049	0.013127	0.008995	0.010614	0.011383
239.04	0.0325258	0.0117153	0.0236344	0.0167573	0.012722	0.009011	0.010273	0.011439
239.28	0.0324639	0.0119498	0.0236431	0.0169707	0.01315	0.0088	0.010888	0.0113
239.52	0.033037	0.0117656	0.0238778	0.0170744	0.013268	0.009133	0.010264	0.011361
239.76	0.0322361	0.0118389	0.0237828	0.0167547	0.013201	0.008831	0.01038	0.011279

## Sheet: AGS1
	minus PTX				plus PTX
Time	Exp1	Exp2	Exp3	Exp4	Exp1	Exp2	Exp3	Exp4
0	0.000488	0.000356	0.000211	0.000388	0.000237263	0.000323489	0.00048713	0.000166708
0.24	0.00048	0.00056	0.000381	0.000292	-4.74686e-05	0.000434879	0.000156382	1.94784e-05
0.48	0.000628	0.000346	0.00036	0.000202	0.000440788	0.000198179	5.25361e-05	0.000484735
0.72	2.26e-05	0.000193	0.000234	0.000718	6.60778e-05	0.000168638	-0.000274007	0.000139857
0.96	0.000148	0.000259	0.00019	0.000508	-2.72873e-06	0.000268814	0.000223475	0.000257712
1.2	0.000459	0.000192	0.00018	0.000468	0.000463216	0.000108365	4.43464e-05	0.000132484
1.44	0.000268	0.00057	0.000389	0.000441	0.00032139	0.000433723	0.000153711	0.000286664
1.68	5.14e-05	0.000236	0.000293	0.000221	0.000100115	-0.000294785	4.706e-05	0.000293856
1.92	-3.8e-05	0.000151	0.0003	0.000391	4.4978e-05	-1.46591e-05	0.0002893	0.00041677
2.16	0.000503	0.000311	0.000283	-4.8e-05	0.000210404	0.000295662	0.000127111	0.000334793
2.4	0.000206	0.000456	0.000135	4.15e-05	-0.000164703	0.00012306	6.89928e-06	0.000519635
2.64	0.000477	0.000176	0.000196	0.000179	-8.92593e-05	-4.5401e-05	0.00037364	0.000205522
2.88	0.000244	0.00031	0.000482	7.71e-05	0.00041579	0.000206612	0.000344064	-1.02402e-05
3.12	8.57e-05	0.00034	0.000249	0.000145	-0.00015837	0.000135155	2.4829e-05	0.000150493
3.36	0.000375	0.000194	0.000457	0.000508	0.000312556	4.3916e-05	0.000134081	0.000112939
3.6	-0.00021	0.000262	0.000358	0.000178	0.000228537	0.000298886	0.000293154	4.30481e-05
3.84	9.76e-05	0.00029	0.000166	0.000318	0.000177449	2.9213e-05	0.000156907	0.000263113
4.08	0.000156	0.000143	0.0002	-0.00012	0.000118888	1.2771e-05	0.000206719	-3.79167e-05
4.32	0.000138	0.000161	0.000241	0.000308	0.000360673	0.000162764	5.37503e-05	9.95142e-05
4.56	0.000262	0.00011	0.000273	0.000386	-8.62532e-05	0.00012708	0.000371799	0.000307838
4.8	0.000365	0.000326	-0.00014	0.000394	0.000374941	5.1761e-05	8.77205e-05	6.9753e-05
5.04	0.000219	0.000345	0.000213	0.0002	0.00020176	-4.26479e-05	6.04682e-05	2.1346e-05
5.28	5.11e-05	0.000302	0.000239	-4.1e-05	-0.000139212	0.000211143	4.5101e-05	-1.10451e-05
5.52	0.000565	0.00039	-5.5e-05	0.000137	0.000151662	0.000221639	7.02307e-05	0.00028568
5.76	-1.3e-06	0.000116	-5e-07	7.56e-05	0.000240071	0.000169901	-3.27853e-06	7.63435e-05
6	4.28e-05	0.000176	0.000383	0.000243	-2.47917e-05	0.000249624	0.00018752	-1.75024e-05
6.24	0.00038	-6.9e-05	0.00015	0.00017	2.73622e-05	0.000291964	3.29766e-05	0.00012456
6.48	-5.1e-05	0.000142	0.000154	0.000495	0.000133921	-0.000168067	3.27879e-05	0.00026877
6.72	-0.00029	9.4e-05	8.8e-05	0.000333	0.000286059	2.96875e-05	-3.8898e-05	8.65266e-05
6.96	-9.8e-05	6.95e-05	8.53e-05	-0.00039	0.000229773	0.000139318	-6.9201e-05	0.000180316
7.2	6.29e-05	0.000317	0.000203	0.000233	0.000129841	9.93755e-05	0.000252179	-3.23703e-05
7.44	-3.9e-05	0.000387	0.000228	0.000359	0.000212301	0.000405201	-0.000187388	9.16842e-05
7.68	-4.5e-05	0.000131	0.000191	0.000196	0.000694789	1.24295e-05	9.90725e-05	0.000199954
7.92	-8.8e-05	0.000357	1.1e-05	-0.00011	8.2776e-07	8.65042e-05	-0.000208486	-8.68512e-05
8.16	4.78e-05	0.000163	0.000316	0.000168	2.06411e-06	-5.77371e-05	7.8388e-05	0.000468416
8.4	0.000215	0.000332	-1.8e-05	5.85e-05	-0.000204925	0.000211866	3.06598e-05	0.000131382
8.64	-0.00019	0.000228	1.38e-05	5.77e-05	-8.36374e-05	0.000368089	1.31587e-05	-0.000201686
8.88	0.000122	0.000145	0.000337	4.77e-05	-0.000222135	8.88708e-05	-0.000158916	7.72114e-05
9.12	-0.00043	-7.8e-06	0.000179	-7.4e-05	0.000231466	0.000104287	-1.9136e-05	0.000164959
9.36	0.000154	0.000157	0.000237	0.000624	-7.92147e-05	-2.07395e-05	-0.000366389	4.39384e-05
9.6	0.000104	-3.6e-05	0.000128	-9.4e-05	0.000303617	-0.000147903	-1.90796e-05	8.27862e-05
9.84	4.09e-05	-8.7e-05	0.00016	0.000338	-9.79886e-05	-0.000102502	-0.000187037	-1.86178e-05
10.08	-9.7e-05	0.000157	0.000272	0.000406	6.49439e-05	0.000173619	-6.68572e-05	-5.3833e-05
10.32	0.000104	8.93e-05	1.14e-05	0.000179	2.75742e-05	-5.87688e-05	0.000226974	5.91977e-05
10.56	-0.00029	-0.00011	0.000182	-9.3e-05	-9.98649e-05	0.000477666	6.85625e-05	0.000136332
10.8	0.000201	7.32e-05	0.000274	0.000101	-0.000184487	0.000185764	-8.44504e-05	-7.28067e-05
11.04	0.000365	-2.9e-05	4.18e-05	0.000283	-0.000179904	7.39772e-05	-2.03283e-05	9.59851e-05
11.28	-0.00027	0.000175	0.000168	0.00057	0.000404436	-7.65522e-05	-4.49812e-05	-6.33258e-05
11.52	4.34e-05	0.000145	0.000184	0.0004	-0.000263057	-7.37375e-07	0.000373823	2.90142e-05
11.76	0.000393	0.000189	7.38e-05	-0.00025	-3.92833e-05	5.16001e-06	-9.95329e-06	-0.000142196
12	0.000223	-3.2e-07	0.000267	0.000101	-0.000329467	0.000133838	0.000102767	0.000344906
12.24	-5.3e-05	0.000196	-0.00013	5.15e-05	0.000119517	3.33323e-05	2.01141e-05	0.000183609
12.48	5.4e-05	0.00013	-3.8e-05	0.000123	-4.42359e-05	0.000208875	2.85414e-05	0.000185045
12.72	0.000155	0.000286	7.49e-05	8.7e-05	-0.000245193	0.000238819	0.000169632	-0.000194886
12.96	-0.00011	-7.8e-05	-2.2e-05	-1.4e-05	-0.000326083	4.91165e-05	-5.43619e-05	5.70384e-05
13.2	-0.00018	0.000101	0.000137	-0.00013	0.000257894	4.98822e-05	9.25962e-05	2.25018e-05
13.44	0.000182	-0.00025	0.000153	-2.8e-05	9.18042e-05	-4.14333e-05	-0.000227034	-0.000103689
13.68	8.22e-05	1.3e-05	0.000156	-3.3e-05	-0.000183551	-7.29057e-05	4.49608e-05	-0.000122886
13.92	8.17e-05	0.00016	0.000166	-2e-05	0.000189807	0.000170809	0.000101354	0.000139587
14.16	0.000298	3.78e-05	2.56e-05	-0.00019	-0.000213653	-6.81513e-05	-4.63585e-05	-9.28955e-05
14.4	0.000312	6.59e-05	-5.8e-05	6.17e-05	-0.000107695	4.47334e-05	0.000155901	-5.51798e-05
14.64	-0.00021	1.62e-05	-2.7e-05	0.000112	0.000134331	-4.57526e-05	-0.000133176	-2.96574e-05
14.88	0.000206	-1.7e-05	7.51e-05	-5e-06	0.000149806	-0.000208187	-5.41108e-05	-0.000128141
15.12	-0.00047	-0.00017	5.71e-05	-0.00013	-8.53929e-05	2.59335e-05	7.56101e-05	-0.00013491
15.36	-0.00025	2.91e-05	-0.0004	-3.3e-05	9.29503e-05	-1.37651e-05	9.76534e-06	0.000228507
15.6	-6.7e-05	-7.2e-05	4.07e-05	-0.00012	-0.000113651	0.000142381	0.000216024	-0.000150947
15.84	0.000186	0.000146	6.32e-05	4.39e-05	3.34338e-05	-4.2942e-05	0.000146023	-0.000157989
16.08	0.000174	-0.00013	-0.00011	-0.0003	0.00015456	-3.49103e-05	-3.31105e-05	0.000350452
16.32	-6.9e-05	-0.00022	-0.00011	1.34e-06	2.64992e-05	-0.000262855	-0.000122566	0.000184405
16.56	-0.0002	3.8e-05	-3.2e-06	5.11e-05	-0.000207697	6.02208e-05	-3.64086e-05	6.94437e-05
16.8	-0.00013	-5.3e-05	-0.0002	-0.00023	-0.00039156	-8.71989e-05	-4.18929e-05	-4.59588e-05
17.04	-0.00021	7.64e-05	-0.00017	-0.0003	-3.08135e-05	0.00019736	0.000174768	0.000191994
17.28	7.53e-05	4.72e-05	0.000123	-0.00028	-0.000113578	4.998e-05	-0.000105645	-0.000260282
17.52	-8.8e-05	0.0001	-2.4e-05	-0.00013	6.11872e-06	-0.000145788	-7.7331e-05	-0.00036139
17.76	0.000112	-0.00012	-1.9e-05	7.7e-05	0.000111665	4.41894e-05	7.16342e-05	9.61642e-05
18	-4.1e-05	-0.00012	-0.0002	0.000123	-0.000324105	-0.000243858	-0.000242026	0.000154792
18.24	-0.00017	-0.0001	-6.3e-05	6.91e-05	-0.000156176	4.30719e-06	-5.76465e-05	-0.000201729
18.48	0.000139	-0.00015	-0.0001	0.000151	-3.53644e-05	-0.000316503	4.31413e-05	9.32054e-05
18.72	-0.0002	-7.3e-05	-0.00016	-0.00024	0.000189873	-0.000169005	-0.000177197	5.09723e-05
18.96	0.000108	-0.00033	-0.00023	2.39e-05	-0.000145832	-0.000104032	-0.000214238	4.05679e-05
19.2	-0.00014	4.54e-06	0.000161	-7.5e-05	0.000207362	-0.000209714	-0.000335608	0.000252422
19.44	0.000173	-2.7e-05	-0.00011	8.81e-05	0.000348563	-0.000183577	4.68656e-05	-0.000267908
19.68	0.000178	0.000168	-0.00021	0.000143	-0.000161011	-0.000259546	-0.000269464	-3.52272e-05
19.92	-0.00018	-0.00018	-0.00027	-0.00026	-9.47362e-05	-0.00013524	-0.000144378	-3.26488e-05
20.16	-0.00015	-0.00017	-0.00026	-0.00027	8.79766e-05	-0.000195513	-0.000312943	-8.35954e-05
20.4	-0.00025	-0.00022	-0.00022	-0.0003	1.65576e-05	5.0943e-05	5.44835e-05	-8.49961e-05
20.64	4.27e-05	-0.00014	-0.00013	-4.4e-05	-0.000361981	-8.31703e-05	-2.21096e-05	-5.26846e-05
20.88	7.77e-06	-8.8e-05	-0.00012	-0.00014	-9.05732e-05	-0.000210701	8.71545e-05	-0.000354984
21.12	-0.00015	-0.00012	-0.00026	0.00011	6.14242e-06	-0.000231881	0.000111406	-0.000351023
21.36	0.00011	-0.00037	-3.9e-05	-0.00023	-8.29919e-05	-3.21402e-05	0.000275152	-1.34597e-06
21.6	0.000185	6.69e-05	-0.00022	1.2e-05	-0.00010478	6.34206e-05	1.29689e-05	-0.000344023
21.84	-0.0002	-0.00017	-0.00022	-6.5e-05	-0.000505948	0.00015476	-0.000254154	-5.7355e-05
22.08	-0.00017	5.58e-05	8.1e-06	-0.00036	-0.000210857	-0.00025629	1.07185e-05	-0.000457252
22.32	-7.9e-05	-0.00028	-0.00031	-9.4e-05	0.000176949	-0.000203633	-0.000257584	-0.000173259
22.56	-1.7e-05	-0.00028	-0.00032	2.33e-06	-3.32707e-05	-0.000188862	-8.78391e-05	-0.000168821
22.8	-0.0001	-0.00022	-7.3e-05	-0.00012	5.23737e-05	0.00016566	-0.000166973	0.000294083
23.04	5.65e-05	-0.0001	-0.00014	-0.00017	-0.000227002	-2.86694e-05	-0.000113044	0.000173913
23.28	-0.00069	-0.00015	-0.00027	1.79e-05	-9.72552e-05	0.00039919	1.84177e-05	0.000126322
23.52	-4.2e-05	-0.00012	-0.00017	1.73e-05	-1.70582e-05	-9.26614e-05	-0.000223524	-0.000173603
23.76	-0.00012	-0.00025	-0.00041	-0.0003	-4.01215e-05	-6.46217e-05	9.2338e-05	-0.000330153
24	-0.00038	-0.00033	-6e-05	-0.00051	-3.77749e-05	-0.000129091	-0.000139872	-0.00018881
24.24	-0.0003	-0.0002	8.26e-05	2.82e-05	-9.4108e-05	-0.000161036	4.40531e-05	-0.000194331
24.48	-0.00026	-0.00021	-0.00016	-0.00053	-0.000190514	-7.79692e-05	-0.000136739	-0.000111539
24.72	5.61e-05	-0.00046	-0.00023	-5e-05	-8.00157e-05	7.43922e-05	-0.000198925	0.000110416
24.96	-0.00032	-0.00031	-0.00023	-0.00065	9.21156e-05	-0.000398672	6.52562e-06	-0.000158541
25.2	-0.00033	-0.00023	-4.5e-05	-0.00014	-0.000316858	-0.000223606	-8.01638e-05	-0.000394443
25.44	6.67e-05	-9.1e-05	-0.00019	-0.00017	-9.66119e-05	-7.49814e-05	-7.11339e-06	-0.000215801
25.68	-6.3e-05	-0.00014	-0.00019	-7.4e-05	0.000124165	-0.000175197	-0.000351592	-7.81333e-05
25.92	-0.00048	-0.00028	-0.00027	-0.00025	-0.000167615	-0.000209449	7.82019e-05	-2.40459e-05
26.16	-0.00054	-0.0003	-0.00019	-0.00014	1.61473e-05	-9.88368e-06	-0.000177511	-4.05359e-05
26.4	2.38e-05	-0.00051	-0.00018	-0.00029	-0.000206964	-0.000288307	2.7641e-05	-0.000398018
26.64	1.91e-05	-0.0003	-0.00014	-0.00073	0.000148162	-0.000347551	5.53508e-05	-0.000474669
26.88	-0.00022	-0.0002	-0.00023	-0.00018	-1.52247e-05	-0.000252409	-5.27516e-05	-0.000172396
27.12	-0.0003	-0.00031	-0.00018	-0.00014	1.27374e-05	-0.000206172	-0.000181009	7.13643e-05
27.36	6.12e-05	-0.00018	-0.00036	-0.00019	-9.59515e-06	-0.000386208	-4.29404e-05	-0.000224688
27.6	-4.5e-05	-0.00038	-0.00024	-0.00049	-0.000157886	-0.000366121	-0.000272114	0.000188549
27.84	-0.00012	-0.00016	-0.00042	-0.00058	-0.000158408	3.39037e-05	-0.000339505	-3.14332e-05
28.08	-0.00034	-0.0002	-0.00038	-0.00023	-0.000311759	-0.000260008	-5.92924e-05	-4.79949e-05
28.32	-0.00033	-0.00026	-0.00032	-0.00034	-0.000288877	-0.000221899	-4.16172e-06	-0.000238168
28.56	-0.00015	-0.00032	-0.00027	-0.00025	-0.00027902	-3.04096e-05	-0.000108819	-0.000254232
28.8	-0.00039	-0.00026	-0.00019	-0.00028	9.06253e-05	-0.000116728	-2.55306e-05	-0.000386407
29.04	-3.5e-05	-0.00029	-0.00016	-0.00035	-9.06453e-05	-0.000123776	-0.000105222	-0.000226782
29.28	-3.9e-05	-0.00057	-0.0004	-0.00041	0.000116698	-7.47063e-05	-1.13032e-05	-0.000167982
29.52	-0.00023	-0.00027	-0.00023	-0.0005	-0.000344073	-3.83942e-06	0.000171143	-0.000209733
29.76	-0.00017	-0.00047	-0.00039	-4.7e-05	-0.0001755	-2.30763e-05	0.000111907	-0.000543078
30	-0.00089	-0.00052	-0.00033	-0.00011	-0.00018244	-0.000445256	0.000108435	-0.000411946
30.24	-1.2e-05	-0.00053	-0.00051	-0.00035	9.80503e-05	-0.000208701	-0.000169681	-0.0002918
30.48	-0.00035	-0.0005	-0.00038	-0.00038	-7.44247e-05	2.39978e-05	-0.000349234	-0.000337621
30.72	-0.00039	-0.00044	-0.00025	-0.00031	-4.95057e-05	-0.000411083	-0.000335255	-0.000186057
30.96	-7.5e-06	2.34e-06	-0.00015	-0.00014	-0.00064557	-0.000250105	-0.000235072	-2.86633e-05
31.2	0.000357	-0.00032	-0.00017	0.000302	-2.14862e-05	-0.000336325	-0.000298599	-0.000156724
31.44	-0.00013	-0.00031	6.28e-05	0.000311	-6.89698e-05	-0.000419231	0.000135039	1.97018e-05
31.68	0.000216	-5.9e-05	0.000271	0.00016	0.000127583	-0.000250108	-0.000257772	2.62869e-05
31.92	0.000557	-1.1e-05	0.000404	0.001011	-0.000205949	-0.000155133	-0.000181109	-0.00029394
32.16	0.000497	0.000476	0.000697	0.001146	0.000113906	-2.40455e-05	-9.03588e-05	5.44085e-05
32.4	0.000937	0.000319	0.000806	0.001159	-7.53385e-05	-0.000214599	-6.20695e-05	8.50567e-05
32.64	0.00096	0.000812	0.001243	0.000991	7.69655e-05	-0.000306865	-2.20775e-05	5.33258e-05
32.88	0.001061	0.001311	0.001425	0.001729	0.000213396	-4.08216e-05	0.000113997	0.00032684
33.12	0.001587	0.001251	0.00187	0.001967	-2.27774e-05	0.000218918	0.000120791	3.55051e-05
33.36	0.001384	0.001325	0.001734	0.002599	0.000141742	0.00017737	0.000295314	0.000140334
33.6	0.00193	0.001511	0.002207	0.002741	0.000114119	0.000101165	-7.26335e-05	0.000442604
33.84	0.001892	0.001537	0.002291	0.002802	7.77007e-05	0.000128635	0.000108341	0.000665042
34.08	0.002425	0.001899	0.002527	0.003601	0.00024506	5.48656e-05	0.000223726	0.000540737
34.32	0.002718	0.001823	0.002882	0.003562	-0.000157324	4.67932e-05	9.64803e-05	0.000480155
34.56	0.002784	0.002204	0.003201	0.003564	2.06544e-05	0.000381888	0.00017251	0.000668211
34.8	0.003055	0.002389	0.003516	0.004095	0.000284437	0.000190629	0.000566354	0.000178879
35.04	0.00308	0.002458	0.003693	0.004534	0.000288824	0.000574082	0.000548401	0.000979441
35.28	0.003221	0.002617	0.003952	0.004473	0.000261473	0.000279803	0.000255287	0.000819445
35.52	0.003325	0.002986	0.004205	0.004751	0.000104148	0.000306527	0.000278298	0.00103462
35.76	0.004181	0.003198	0.004491	0.004609	0.000537208	0.00014065	0.00041325	0.000814565
36	0.004301	0.003181	0.004685	0.00514	0.000429708	0.000461588	0.000324004	0.00102454
36.24	0.004757	0.003266	0.004996	0.005411	0.000374354	0.000528991	0.000654855	0.000750965
36.48	0.004282	0.003534	0.004968	0.005459	0.000255331	0.000367103	0.000477274	0.000895939
36.72	0.004484	0.003716	0.005188	0.005821	0.000596588	0.000770635	0.000698843	0.00105528
36.96	0.004818	0.003928	0.005524	0.0062	0.00065357	0.000387218	0.000533991	0.0013469
37.2	0.004957	0.004071	0.005801	0.006028	0.000613226	0.000590358	0.00032101	0.000930543
37.44	0.005126	0.003964	0.005855	0.006317	0.000398518	0.000767516	0.000590179	0.00153043
37.68	0.004979	0.004365	0.005978	0.00667	0.001157	0.00134985	0.00089436	0.00129406
37.92	0.005679	0.004451	0.006146	0.006488	0.000828999	0.000828045	0.00085966	0.00134058
38.16	0.005893	0.004498	0.006359	0.006923	0.000491599	0.000574251	0.000749243	0.00129247
38.4	0.005693	0.004504	0.006552	0.007248	0.000785511	0.000603571	0.00109332	0.00119351
38.64	0.006077	0.004794	0.006977	0.006896	0.000618543	0.000868211	0.000954619	0.00179108
38.88	0.00618	0.004878	0.006727	0.006942	0.000857514	0.000874148	0.00118314	0.00153516
39.12	0.006509	0.005165	0.006988	0.007958	0.000838328	0.000963104	0.00111703	0.00183507
39.36	0.007457	0.005247	0.006846	0.008072	0.00118395	0.00100928	0.000880485	0.00178134
39.6	0.006741	0.005142	0.007297	0.007872	0.000579911	0.0010495	0.00136094	0.00167402
39.84	0.006894	0.00545	0.007331	0.008292	0.000615537	0.00104968	0.00145544	0.00192306
40.08	0.007224	0.005532	0.007863	0.008052	0.00065357	0.000948462	0.00104948	0.00209718
40.32	0.007195	0.005568	0.007831	0.008117	0.000952732	0.00128739	0.00175818	0.00196239
40.56	0.00716	0.005437	0.008035	0.008057	0.000919478	0.00117016	0.00131109	0.0017575
40.8	0.00776	0.005812	0.008003	0.008775	0.000845094	0.00137879	0.0013567	0.00196531
41.04	0.007948	0.005774	0.008086	0.00873	0.00113385	0.00164699	0.0015246	0.00208493
41.28	0.008135	0.005912	0.008273	0.008933	0.000731112	0.00159014	0.00136738	0.00188911
41.52	0.007862	0.005778	0.008264	0.00898	0.0011013	0.00100946	0.00129295	0.0020651
41.76	0.007684	0.005915	0.008309	0.009103	0.000931182	0.00126986	0.00165868	0.00177596
42	0.008444	0.006183	0.008323	0.009269	0.00118287	0.00136456	0.00127529	0.00227733
42.24	0.00808	0.006121	0.008677	0.00938	0.000923598	0.00132401	0.00178356	0.0023156
42.48	0.008609	0.00611	0.008649	0.008905	0.000897812	0.00124139	0.00174996	0.00214963
42.72	0.008114	0.006267	0.008838	0.009572	0.00153511	0.00131217	0.00160983	0.00223307
42.96	0.008863	0.006419	0.008674	0.00924	0.00120057	0.00136926	0.00138432	0.0022569
43.2	0.009254	0.006634	0.009028	0.009692	0.00120492	0.00151701	0.00188087	0.00234551
43.44	0.009031	0.006531	0.009054	0.009561	0.00087671	0.00161692	0.00188514	0.00249135
43.68	0.008644	0.006534	0.009128	0.009947	0.00109206	0.00159308	0.00188078	0.00262852
43.92	0.009015	0.006769	0.009217	0.009736	0.00126836	0.00154112	0.00183737	0.00265176
44.16	0.009101	0.006556	0.009564	0.010061	0.00119868	0.00135862	0.00199499	0.00208603
44.4	0.009195	0.00692	0.009333	0.009931	0.00116567	0.00177662	0.00172057	0.00216576
44.64	0.009117	0.006589	0.00969	0.010038	0.00155323	0.00142301	0.00183863	0.00250771
44.88	0.009434	0.006612	0.009654	0.00991	0.00121998	0.00162375	0.0016598	0.00220972
45.12	0.009509	0.006806	0.009469	0.009923	0.000983766	0.00158153	0.00204097	0.00227311
45.36	0.009802	0.006869	0.009645	0.01008	0.00119144	0.00174509	0.00198347	0.00274735
45.6	0.009613	0.007024	0.009626	0.010454	0.00147339	0.00147829	0.00187953	0.00270003
45.84	0.009918	0.006926	0.009498	0.0103	0.00144152	0.00139252	0.00184772	0.00230833
46.08	0.009648	0.007164	0.00975	0.010197	0.00122624	0.00161166	0.00220574	0.00262982
46.32	0.010116	0.007183	0.009761	0.010417	0.00139036	0.00147468	0.0019102	0.00274228
46.56	0.010115	0.007194	0.010177	0.010164	0.00136052	0.00168885	0.00193119	0.00271255
46.8	0.010257	0.007364	0.010149	0.010666	0.00154165	0.00186482	0.00208102	0.00275456
47.04	0.010505	0.007126	0.010061	0.010714	0.00131858	0.00171915	0.00214222	0.0026705
47.28	0.010325	0.007329	0.010027	0.010653	0.00114559	0.00169602	0.00250772	0.00269133
47.52	0.010477	0.007147	0.01023	0.010777	0.00184396	0.00205498	0.00198936	0.0027867
47.76	0.010253	0.007388	0.010312	0.010832	0.00152235	0.00168431	0.00209267	0.00285222
48	0.01036	0.007411	0.010041	0.01076	0.0014416	0.00173657	0.00214808	0.00244583
48.24	0.010662	0.0074	0.010317	0.010748	0.00116491	0.0018554	0.00220249	0.00304515
48.48	0.010404	0.007363	0.010548	0.010849	0.00135164	0.00213013	0.00235804	0.00268768
48.72	0.010777	0.007543	0.010342	0.010936	0.00112813	0.00224219	0.00223162	0.00274833
48.96	0.01051	0.007803	0.010615	0.010967	0.00160393	0.00169888	0.00255569	0.00274489
49.2	0.010572	0.007807	0.010283	0.011173	0.00159183	0.00198173	0.00231475	0.00289061
49.44	0.010805	0.007259	0.01041	0.011028	0.00177111	0.00218998	0.00232263	0.00259074
49.68	0.010591	0.007607	0.010519	0.011192	0.00135566	0.00201272	0.00249191	0.00307854
49.92	0.010676	0.007682	0.010639	0.010815	0.00197752	0.00178862	0.00220975	0.00288249
50.16	0.011101	0.007781	0.01053	0.011545	0.00166172	0.00200393	0.00274088	0.00273325
50.4	0.010908	0.007851	0.010687	0.011295	0.00165531	0.00217577	0.0024975	0.00305043
50.64	0.011317	0.00781	0.010293	0.011116	0.00141872	0.00187689	0.00266068	0.00297597
50.88	0.011212	0.007693	0.010453	0.011526	0.00116357	0.00203432	0.00278243	0.00297851
51.12	0.011023	0.007687	0.01057	0.011238	0.00132774	0.00171998	0.00242775	0.00323487
51.36	0.011275	0.007655	0.010733	0.011259	0.00154528	0.00197236	0.00265674	0.00276486
51.6	0.010732	0.007639	0.010781	0.011248	0.00167832	0.00190184	0.00280455	0.00290061
51.84	0.012054	0.007585	0.010864	0.011229	0.00147981	0.0021816	0.00258276	0.00287315
52.08	0.011053	0.007899	0.010912	0.011747	0.00179529	0.00202265	0.0022853	0.00330916
52.32	0.011742	0.00797	0.010964	0.011305	0.00177894	0.00205801	0.00254414	0.00331826
52.56	0.011029	0.00805	0.010997	0.01179	0.00177445	0.00224311	0.00253308	0.00317706
52.8	0.011282	0.007864	0.010957	0.011559	0.00200449	0.00196135	0.00279273	0.0027227
53.04	0.011642	0.007925	0.010831	0.011621	0.00142037	0.0023762	0.00241049	0.00318271
53.28	0.011858	0.007962	0.011117	0.011613	0.00152301	0.00186772	0.00236184	0.0037066
53.52	0.011638	0.007988	0.011021	0.011896	0.00187042	0.00190725	0.00252215	0.00342117
53.76	0.011519	0.008379	0.011329	0.011821	0.00204208	0.00233758	0.0025375	0.00324514
54	0.011548	0.0083	0.010966	0.011315	0.00175887	0.00223396	0.00264735	0.00329817
54.24	0.01172	0.00811	0.010991	0.011952	0.00194141	0.00204625	0.00280093	0.00324331
54.48	0.011974	0.008254	0.011345	0.011351	0.00169264	0.00200234	0.00277029	0.00325658
54.72	0.011745	0.008131	0.011197	0.011834	0.00161885	0.00199507	0.00228969	0.00282685
54.96	0.011738	0.008174	0.011276	0.011626	0.00197747	0.00199819	0.0030039	0.00331819
55.2	0.012255	0.008157	0.011091	0.011804	0.00168884	0.00203017	0.00313754	0.00334373
55.44	0.012179	0.008005	0.011354	0.012056	0.0016242	0.00203084	0.00293018	0.00340512
55.68	0.012221	0.00822	0.011278	0.01164	0.00146543	0.00197365	0.00288072	0.0031395
55.92	0.011561	0.008184	0.011478	0.011768	0.00193333	0.00223294	0.00266427	0.00343975
56.16	0.011933	0.008242	0.011544	0.012183	0.00179101	0.00220443	0.00292659	0.00343298
56.4	0.011932	0.008236	0.011073	0.011871	0.00165432	0.00223475	0.00251434	0.00304891
56.64	0.011541	0.008465	0.011164	0.011695	0.00173781	0.00218568	0.00290729	0.00323858
56.88	0.011989	0.008314	0.011153	0.011973	0.00195985	0.00221281	0.0027946	0.00325513
57.12	0.012073	0.008363	0.011297	0.011889	0.00221321	0.00230663	0.0030118	0.00305949
57.36	0.012456	0.008506	0.011253	0.011777	0.00205831	0.00235514	0.00288203	0.00346407
57.6	0.012219	0.008168	0.011488	0.012239	0.00222184	0.00207985	0.00249636	0.00334872
57.84	0.011867	0.00839	0.011426	0.012324	0.00203516	0.00228814	0.00252884	0.0030743
58.08	0.011858	0.00818	0.011374	0.012026	0.0017904	0.00217757	0.00274275	0.00316185
58.32	0.012476	0.008279	0.011577	0.012452	0.00189959	0.00218949	0.0030404	0.00293469
58.56	0.012286	0.00844	0.011502	0.012065	0.00165716	0.00203018	0.00311462	0.00320973
58.8	0.012058	0.00833	0.011709	0.012446	0.00217645	0.00201774	0.0029513	0.00340639
59.04	0.012125	0.00829	0.011623	0.012103	0.00212632	0.00233967	0.0028897	0.0034168
59.28	0.012437	0.008216	0.011569	0.012084	0.00196347	0.00239355	0.0027229	0.00331608
59.52	0.012452	0.008587	0.011619	0.012092	0.00195456	0.0018934	0.00321445	0.00345549
59.76	0.012341	0.008381	0.011453	0.012609	0.00157812	0.00228049	0.00292713	0.00358893
60	0.012628	0.00865	0.011442	0.012106	0.00167929	0.00208522	0.00305804	0.00317437
60.24	0.012291	0.008616	0.011713	0.012179	0.00185826	0.00245957	0.0027432	0.00314077
60.48	0.012469	0.00854	0.01139	0.012474	0.00205729	0.00243787	0.002558	0.00341519
60.72	0.012628	0.008334	0.011394	0.012335	0.00189362	0.00223044	0.00278678	0.0032044
60.96	0.012374	0.008367	0.0114	0.012242	0.00196483	0.00212921	0.00306035	0.00356023
61.2	0.012239	0.008644	0.011894	0.012237	0.00223262	0.002601	0.00281125	0.00319302
61.44	0.012053	0.008384	0.01168	0.012439	0.00181393	0.00208459	0.00330977	0.00392452
61.68	0.012448	0.008705	0.011616	0.012502	0.0018003	0.00236029	0.00299016	0.00361676
61.92	0.012539	0.008497	0.011689	0.012392	0.00219308	0.00238138	0.00302858	0.00341047
62.16	0.012644	0.008894	0.011883	0.012449	0.00175195	0.00212821	0.00274993	0.00362136
62.4	0.012588	0.008436	0.011466	0.012512	0.00204473	0.00214358	0.00332827	0.00341526
62.64	0.012232	0.008676	0.011767	0.012447	0.00210788	0.0020482	0.00296803	0.00336766
62.88	0.012907	0.008516	0.011636	0.01216	0.00199791	0.00237556	0.00299549	0.00323252
63.12	0.012825	0.008466	0.011985	0.012348	0.00191385	0.0020783	0.00276226	0.00316248
63.36	0.012539	0.008688	0.01158	0.012395	0.00190518	0.00263478	0.00321183	0.00333052
63.6	0.012842	0.008618	0.011825	0.012399	0.00214532	0.00217555	0.00284641	0.00323399
63.84	0.012555	0.008524	0.011917	0.012549	0.00206035	0.00231732	0.00254015	0.00348633
64.08	0.01254	0.008332	0.011986	0.012385	0.00204139	0.00233378	0.00297318	0.00343837
64.32	0.012969	0.008492	0.011651	0.012032	0.00146714	0.00214594	0.00321585	0.00311149
64.56	0.012569	0.008554	0.011825	0.012436	0.00217121	0.00239242	0.00303149	0.00313199
64.8	0.012607	0.00866	0.011742	0.012671	0.00191104	0.0021415	0.00295149	0.00332509
65.04	0.012543	0.008668	0.011848	0.012338	0.00206396	0.00221229	0.00305571	0.00371099
65.28	0.012794	0.008629	0.011849	0.012522	0.00180473	0.00226824	0.00293925	0.0034334
65.52	0.012635	0.008544	0.011439	0.012667	0.00189732	0.00252787	0.00322223	0.00319924
65.76	0.012502	0.008473	0.011894	0.01261	0.00181146	0.00249878	0.0029494	0.00372717
66	0.012924	0.008674	0.011783	0.012401	0.00215355	0.00207034	0.00304921	0.00328277
66.24	0.013175	0.008419	0.011759	0.012743	0.0021239	0.00240207	0.00324768	0.00353681
66.48	0.012252	0.008572	0.011685	0.012272	0.00154426	0.00229876	0.00320907	0.00347969
66.72	0.01256	0.008529	0.01209	0.012559	0.00209752	0.00242846	0.00328403	0.0033197
66.96	0.013113	0.008656	0.011906	0.012813	0.00200305	0.00202043	0.00319789	0.00340584
67.2	0.012962	0.008604	0.012172	0.012849	0.00241949	0.00247858	0.00296665	0.00358641
67.44	0.012892	0.008777	0.01217	0.012504	0.001904	0.00222862	0.00318862	0.00345912
67.68	0.013058	0.008606	0.011807	0.012718	0.00206765	0.00221294	0.00312874	0.0031892
67.92	0.012948	0.008341	0.012186	0.012618	0.00193237	0.00267043	0.00309357	0.00360851
68.16	0.013152	0.008804	0.011909	0.012385	0.0016217	0.00237147	0.00303747	0.0034828
68.4	0.012845	0.00865	0.012067	0.012298	0.00173424	0.002236	0.00310582	0.00332981
68.64	0.013085	0.008951	0.011798	0.01242	0.00206281	0.00223145	0.00298507	0.0034508
68.88	0.012849	0.008752	0.012027	0.012943	0.00185643	0.00222759	0.00293848	0.00343862
69.12	0.012723	0.008758	0.011855	0.012785	0.00206626	0.00230204	0.00325189	0.00338416
69.36	0.012764	0.008567	0.011937	0.012676	0.00197618	0.00256825	0.00291122	0.00344789
69.6	0.012968	0.008724	0.012131	0.012898	0.00196128	0.00250186	0.00323133	0.00363656
69.84	0.012872	0.008521	0.012129	0.012746	0.0016617	0.00225509	0.00289271	0.00364504
70.08	0.013077	0.008864	0.011902	0.012791	0.00215685	0.00248007	0.00310566	0.00375799
70.32	0.013008	0.008821	0.011948	0.013129	0.00207111	0.00253808	0.00299823	0.00346725
70.56	0.013636	0.008748	0.011919	0.01244	0.00181276	0.0021624	0.00291993	0.00355668
70.8	0.012989	0.008603	0.011975	0.012762	0.00211874	0.00238103	0.00322851	0.00334006
71.04	0.012999	0.008628	0.012097	0.012457	0.00214845	0.00234367	0.00290538	0.00356297
71.28	0.012835	0.008599	0.011639	0.01259	0.00205928	0.00231946	0.00311922	0.00341388
71.52	0.012273	0.008742	0.012074	0.01273	0.00186337	0.00211958	0.00290214	0.00345046
71.76	0.013385	0.008857	0.012196	0.01242	0.00207684	0.00239851	0.00306902	0.00351401
72	0.012873	0.008769	0.012241	0.012328	0.00209973	0.00169109	0.00295699	0.0034381
72.24	0.013423	0.008634	0.012199	0.012658	0.00196259	0.00196403	0.00342071	0.00332275
72.48	0.013246	0.008797	0.011921	0.012823	0.00211902	0.00210706	0.00310586	0.00367022
72.72	0.013467	0.00893	0.012246	0.012669	0.00181434	0.00241085	0.0029431	0.00386038
72.96	0.013053	0.008716	0.012404	0.012969	0.00201146	0.00217347	0.00299388	0.00353971
73.2	0.01297	0.008742	0.011975	0.012811	0.00185484	0.00203503	0.00305318	0.00362615
73.44	0.013385	0.00852	0.012094	0.01301	0.00185824	0.0020599	0.00315212	0.00353922
73.68	0.012882	0.008482	0.012249	0.012815	0.00210318	0.00223167	0.0031873	0.00350765
73.92	0.013485	0.008515	0.012184	0.012734	0.00201137	0.00231583	0.00331	0.00333675
74.16	0.012933	0.008525	0.012184	0.012801	0.00216933	0.00242941	0.00317431	0.00350836
74.4	0.013465	0.009003	0.012416	0.012665	0.00200404	0.00230674	0.00312663	0.0036245
74.64	0.013066	0.00871	0.012289	0.012877	0.00183612	0.00188075	0.0027638	0.00343414
74.88	0.01334	0.008733	0.012348	0.012781	0.00214444	0.00199209	0.00340557	0.00359922
75.12	0.012948	0.008697	0.012288	0.013016	0.00187143	0.00224397	0.0029233	0.00345933
75.36	0.013084	0.008504	0.011991	0.012816	0.00188801	0.00232195	0.00314726	0.00348798
75.6	0.013196	0.00851	0.012466	0.012975	0.00189281	0.00215113	0.00334306	0.00344888
75.84	0.013205	0.008691	0.012199	0.012906	0.00195334	0.00219978	0.00335392	0.003599
76.08	0.013169	0.008803	0.012515	0.012771	0.00201867	0.00206806	0.00307738	0.00361068
76.32	0.013201	0.008703	0.012076	0.012966	0.00185536	0.00238188	0.00309981	0.00358563
76.56	0.013078	0.009107	0.012409	0.012679	0.00204268	0.00199496	0.00312795	0.00329964
76.8	0.013163	0.008708	0.012477	0.012785	0.00164373	0.00228354	0.00309826	0.00340991
77.04	0.013534	0.008655	0.012116	0.013062	0.00164137	0.00214272	0.00321427	0.00319744
77.28	0.013247	0.008435	0.012447	0.012847	0.00183668	0.00209851	0.00324937	0.00372942
77.52	0.013139	0.008487	0.01247	0.012757	0.00171164	0.00193228	0.00319749	0.00322663
77.76	0.013434	0.008725	0.012174	0.012489	0.00203423	0.00224568	0.00300333	0.00347679
78	0.013878	0.008613	0.012269	0.013038	0.00228745	0.00211067	0.00297941	0.00343861
78.24	0.013195	0.008533	0.012194	0.012985	0.00240812	0.00240236	0.00348424	0.00344364
78.48	0.012781	0.008447	0.01244	0.012963	0.00186506	0.00234205	0.00313424	0.00353557
78.72	0.013224	0.008724	0.012277	0.013013	0.00186377	0.00206161	0.00290061	0.00322677
78.96	0.013159	0.008726	0.012191	0.012739	0.00237497	0.00227985	0.0035356	0.00352145
79.2	0.013497	0.008681	0.012364	0.012918	0.00181649	0.00213456	0.00299729	0.00336873
79.44	0.01329	0.008689	0.012249	0.012515	0.00198299	0.00222961	0.00336604	0.00368326
79.68	0.013934	0.008554	0.012116	0.012803	0.00198561	0.00227627	0.0032708	0.00361659
79.92	0.013166	0.00852	0.012388	0.012832	0.0017966	0.0021694	0.00303584	0.00351266
80.16	0.013267	0.008837	0.012519	0.012924	0.00201216	0.00221113	0.00316661	0.00321475
80.4	0.013599	0.008602	0.012038	0.01304	0.00164025	0.00231144	0.00346361	0.00376096
80.64	0.012953	0.008702	0.012315	0.01313	0.00216475	0.00204511	0.00308122	0.00360013
80.88	0.013242	0.008864	0.012259	0.012635	0.00156123	0.00196681	0.00336783	0.00392663
81.12	0.013379	0.008844	0.012438	0.012888	0.00174631	0.0023336	0.00298678	0.00350096
81.36	0.013691	0.008676	0.012436	0.013232	0.00201053	0.00228334	0.00343202	0.00376319
81.6	0.013387	0.008599	0.012371	0.012697	0.00207228	0.00202152	0.00298242	0.00361403
81.84	0.013522	0.008555	0.012444	0.012824	0.00175469	0.00219282	0.00345167	0.00331701
82.08	0.013648	0.008717	0.012602	0.012585	0.00184017	0.00197155	0.00320061	0.00349247
82.32	0.013316	0.008787	0.012459	0.013261	0.00213297	0.00227894	0.00296895	0.00333592
82.56	0.013514	0.008541	0.012199	0.013048	0.00215007	0.00191614	0.00320555	0.00322372
82.8	0.013677	0.008412	0.012173	0.013195	0.00191768	0.00252415	0.00297239	0.00363517
83.04	0.013453	0.008539	0.012435	0.01322	0.00193926	0.00210467	0.00307915	0.0033533
83.28	0.013544	0.008703	0.012447	0.01298	0.00184061	0.0020716	0.00320379	0.00351898
83.52	0.013719	0.008659	0.012345	0.013015	0.00168401	0.00203396	0.00320305	0.00359747
83.76	0.013479	0.00861	0.012153	0.012666	0.00176928	0.00190749	0.0030267	0.00366816
84	0.01337	0.008276	0.012429	0.012727	0.00206287	0.00208162	0.00325374	0.00325598
84.24	0.013648	0.008601	0.012543	0.012877	0.00179185	0.0021349	0.0034261	0.00325572
84.48	0.013481	0.008915	0.012428	0.012946	0.00175783	0.00235087	0.00326607	0.00344612
84.72	0.013524	0.008549	0.012728	0.013412	0.00206849	0.00196526	0.00318631	0.00394522
84.96	0.013366	0.008392	0.012379	0.013175	0.00200295	0.00197256	0.0029063	0.0034763
85.2	0.013322	0.008874	0.012278	0.013035	0.00195235	0.00213506	0.00283356	0.00340391
85.44	0.013603	0.008565	0.012825	0.013164	0.00218077	0.00191991	0.0029682	0.00328198
85.68	0.013554	0.008734	0.012219	0.012819	0.00194463	0.00175424	0.00337503	0.00352724
85.92	0.013186	0.008773	0.012468	0.013328	0.00210035	0.00231543	0.00301988	0.00320871
86.16	0.013718	0.008535	0.012381	0.013297	0.00211732	0.00206489	0.00294666	0.00354995
86.4	0.013295	0.008525	0.012149	0.013363	0.00196043	0.00204374	0.00340813	0.00342139
86.64	0.013405	0.008775	0.012341	0.01282	0.00164899	0.00199676	0.0030549	0.00341229
86.88	0.013654	0.008692	0.012478	0.013164	0.001891	0.00195457	0.00308079	0.0036015
87.12	0.013983	0.008528	0.012519	0.012904	0.00197068	0.00223337	0.00325853	0.00355946
87.36	0.013767	0.008489	0.01254	0.012904	0.00218926	0.00202037	0.00303798	0.00353164
87.6	0.013171	0.00812	0.012487	0.01331	0.00182432	0.00242217	0.00341926	0.00351846
87.84	0.013939	0.00855	0.012508	0.012691	0.00173798	0.00200138	0.0029525	0.003548
88.08	0.013394	0.00848	0.012503	0.01308	0.00201425	0.00192728	0.00336438	0.00333156
88.32	0.013648	0.008634	0.012479	0.013126	0.00176752	0.00183832	0.00312806	0.00307309
88.56	0.013434	0.008716	0.012444	0.013234	0.00160544	0.00187916	0.00300089	0.00323508
88.8	0.01319	0.008648	0.012272	0.013317	0.00207225	0.00182776	0.00299403	0.00375005
89.04	0.013996	0.008813	0.012595	0.012979	0.00150131	0.00210128	0.00293236	0.00357246
89.28	0.013549	0.0085	0.012454	0.013137	0.00173188	0.00196822	0.00294733	0.00337531
89.52	0.013655	0.008636	0.012385	0.013198	0.00214549	0.00236317	0.00324679	0.00374446
89.76	0.01358	0.008511	0.012726	0.013433	0.00200666	0.00226818	0.00297304	0.00352601
90	0.013643	0.008774	0.012646	0.012942	0.00187149	0.00189149	0.00316391	0.00327397
90.24	0.013596	0.008893	0.012585	0.013154	0.00202295	0.00188508	0.00334783	0.00382466
90.48	0.01388	0.008494	0.012427	0.013071	0.00175947	0.00210835	0.00284983	0.00308572
90.72	0.013696	0.008477	0.012369	0.013396	0.00178114	0.00223967	0.00301392	0.00334089
90.96	0.01357	0.008415	0.012505	0.013222	0.00157348	0.00189989	0.00332725	0.00351722
91.2	0.013453	0.008678	0.012699	0.013136	0.00191648	0.00200029	0.00313956	0.0034942
91.44	0.013783	0.008466	0.012536	0.013104	0.0017813	0.00202864	0.00304099	0.00340369
91.68	0.013775	0.008352	0.012448	0.013092	0.00177291	0.00177446	0.0030961	0.00367391
91.92	0.01337	0.008393	0.012661	0.013024	0.00197769	0.00237014	0.00296249	0.00334482
92.16	0.013556	0.008687	0.012512	0.013103	0.00198072	0.00206068	0.00353629	0.0033386
92.4	0.014034	0.008635	0.012468	0.012866	0.0015649	0.00187258	0.00322354	0.00352062
92.64	0.014099	0.008245	0.012712	0.013015	0.00177779	0.00193269	0.00309896	0.00344581
92.88	0.013734	0.008627	0.012721	0.012647	0.00205689	0.00182486	0.00317284	0.00332448
93.12	0.013639	0.008632	0.012273	0.013008	0.00181006	0.00172023	0.00296979	0.00387075
93.36	0.013738	0.008425	0.012465	0.013066	0.00155316	0.00163747	0.00310789	0.00337964
93.6	0.013615	0.008759	0.012578	0.01316	0.00187572	0.00230896	0.00297056	0.00342807
93.84	0.014149	0.008398	0.012579	0.012842	0.00187974	0.00184522	0.00326536	0.00372871
94.08	0.013901	0.008818	0.012802	0.013108	0.00193259	0.00179822	0.00318256	0.00307851
94.32	0.013891	0.008551	0.012709	0.012592	0.00222382	0.00181553	0.00314796	0.0033332
94.56	0.013588	0.008528	0.01236	0.012829	0.00184262	0.00177822	0.00312877	0.0032522
94.8	0.013537	0.008627	0.012451	0.013294	0.00206479	0.00195192	0.00289307	0.00341433
95.04	0.013481	0.008568	0.012714	0.013731	0.00208303	0.00217024	0.00327846	0.00337546
95.28	0.013572	0.008454	0.012813	0.013096	0.00161223	0.00187419	0.00329047	0.00365292
95.52	0.013676	0.008594	0.012538	0.013413	0.00203209	0.00206618	0.00318916	0.00384034
95.76	0.01356	0.008434	0.012584	0.012375	0.00195276	0.00198446	0.00316907	0.00350394
96	0.014105	0.008223	0.012819	0.013105	0.00161216	0.00218929	0.00301936	0.00397439
96.24	0.013873	0.008339	0.012786	0.013258	0.00178956	0.00180221	0.00327737	0.00350246
96.48	0.013691	0.008476	0.012552	0.012831	0.00214228	0.00157368	0.00314515	0.003664
96.72	0.013475	0.008129	0.012761	0.013563	0.00194529	0.00216336	0.0032035	0.00342029
96.96	0.013745	0.008416	0.012965	0.012993	0.00169984	0.00154794	0.00292786	0.00319279
97.2	0.013407	0.008659	0.012879	0.012906	0.00181822	0.00182974	0.00303361	0.0032475
97.44	0.013879	0.008609	0.012907	0.01302	0.00198203	0.00203537	0.00303688	0.00361426
97.68	0.01371	0.008482	0.012671	0.013036	0.00164816	0.00164862	0.00326682	0.00362131
97.92	0.013849	0.008428	0.012922	0.012773	0.00156966	0.00163461	0.00274959	0.00329677
98.16	0.01373	0.00874	0.012493	0.013185	0.00185189	0.00193467	0.00308864	0.00337806
98.4	0.013973	0.008464	0.012984	0.013233	0.00175968	0.00170195	0.00318285	0.00327405
98.64	0.014363	0.008402	0.01278	0.01324	0.00206846	0.00188675	0.00313966	0.00347956
98.88	0.013382	0.008403	0.012405	0.012856	0.00188794	0.00184646	0.00312591	0.00299601
99.12	0.014148	0.008208	0.012746	0.013376	0.00155553	0.00166339	0.0035418	0.0033896
99.36	0.013739	0.008686	0.012741	0.013094	0.0019095	0.00173725	0.00309377	0.00349554
99.6	0.013876	0.008159	0.012736	0.013162	0.00208001	0.00170954	0.00316866	0.00332036
99.84	0.013168	0.008329	0.012792	0.012985	0.00175158	0.00178143	0.0032977	0.00311089
100.08	0.014054	0.008365	0.012867	0.01334	0.00172337	0.00173505	0.00319005	0.00326139
100.32	0.014026	0.008373	0.012772	0.013002	0.00176792	0.0017043	0.00299781	0.00364064
100.56	0.013433	0.008648	0.0127	0.013017	0.00190592	0.00197776	0.00310565	0.00336392
100.8	0.013481	0.008312	0.01295	0.013298	0.00156716	0.00191778	0.0032351	0.00350261
101.04	0.013895	0.00824	0.012515	0.013197	0.0016154	0.00166939	0.00310576	0.00358829
101.28	0.013714	0.008259	0.013005	0.013047	0.0018147	0.00196304	0.00309957	0.0034736
101.52	0.013832	0.008376	0.012538	0.013167	0.00165252	0.00184563	0.00297353	0.00354264
101.76	0.013741	0.008156	0.012868	0.013006	0.00176176	0.00188486	0.00333326	0.00355271
102	0.013948	0.008148	0.012534	0.013151	0.00142545	0.00179867	0.00312087	0.00333598
102.24	0.013973	0.008415	0.012765	0.013098	0.00182042	0.00171052	0.00292491	0.00342896
102.48	0.013791	0.008404	0.012812	0.013612	0.00183696	0.00184422	0.00315723	0.00354657
102.72	0.013696	0.008275	0.012492	0.01324	0.00172633	0.00178529	0.00325063	0.00362423
102.96	0.014382	0.008314	0.012791	0.013182	0.00191061	0.00162729	0.0031068	0.00341724
103.2	0.013617	0.008445	0.012616	0.013188	0.00167106	0.00200895	0.00299927	0.00342129
103.44	0.013959	0.008361	0.012952	0.013022	0.00191182	0.00180335	0.00347248	0.00339595
103.68	0.013777	0.008413	0.012706	0.012933	0.00193105	0.00184431	0.00297654	0.00310106
103.92	0.013773	0.00829	0.013144	0.013455	0.0015324	0.00176236	0.0033121	0.00354904
104.16	0.013799	0.008381	0.01272	0.012837	0.00165297	0.00198127	0.00329692	0.00316534
104.4	0.013692	0.008181	0.012914	0.013083	0.0017909	0.00184233	0.00304803	0.00329834
104.64	0.013539	0.008482	0.012755	0.013699	0.00158905	0.00195427	0.00304343	0.00345828
104.88	0.013976	0.008327	0.012786	0.013304	0.00170117	0.00177275	0.00287962	0.00329954
105.12	0.01415	0.008475	0.012927	0.013144	0.00191453	0.00189158	0.00289068	0.00322681
105.36	0.013278	0.008113	0.012596	0.013023	0.00164525	0.00209616	0.00307097	0.00330124
105.6	0.013892	0.008343	0.012875	0.013335	0.00188482	0.00171044	0.00301302	0.00369725
105.84	0.013503	0.008462	0.01257	0.013017	0.00183019	0.00154467	0.00342447	0.00330989
106.08	0.014189	0.008581	0.012959	0.013357	0.00181245	0.00172816	0.00312291	0.00330442
106.32	0.013875	0.00865	0.013107	0.013447	0.00198797	0.0015489	0.00321694	0.00326129
106.56	0.013619	0.008145	0.012773	0.013489	0.00170904	0.00169983	0.00343482	0.00347125
106.8	0.013841	0.008119	0.012707	0.012856	0.00196806	0.00165389	0.00321784	0.00329446
107.04	0.013805	0.008094	0.012953	0.013117	0.00193235	0.001585	0.00298024	0.00359114
107.28	0.013547	0.008264	0.013049	0.013323	0.00202208	0.00180573	0.0033427	0.00339097
107.52	0.01352	0.008156	0.012676	0.013277	0.00173532	0.00161333	0.00319411	0.00310908
107.76	0.013513	0.008516	0.012524	0.013132	0.00157037	0.00158657	0.00327874	0.00349291
108	0.014069	0.008249	0.012722	0.013291	0.00184022	0.00191397	0.00318123	0.00336074
108.24	0.013407	0.008185	0.013123	0.013275	0.00157892	0.00194453	0.00298912	0.00328463
108.48	0.0135	0.008484	0.013205	0.012693	0.00156956	0.00164838	0.00307936	0.0037143
108.72	0.013937	0.008535	0.012874	0.013038	0.00173308	0.00171477	0.00327806	0.00307227
108.96	0.013929	0.008045	0.013057	0.013303	0.0017498	0.00157609	0.00311727	0.0033509
109.2	0.013824	0.008302	0.013335	0.012497	0.00205188	0.00179702	0.00269479	0.00308641
109.44	0.014132	0.008373	0.01294	0.013166	0.00173326	0.00159531	0.00320066	0.00335581
109.68	0.013841	0.008259	0.013056	0.013159	0.00171902	0.00163617	0.00310115	0.00326096
109.92	0.01342	0.008133	0.013118	0.01254	0.00170524	0.00164851	0.0029362	0.00333842
110.16	0.013674	0.008259	0.012698	0.013052	0.00137245	0.00159674	0.00306424	0.00307647
110.4	0.014014	0.008238	0.012671	0.013554	0.00180813	0.00148524	0.00334474	0.00337184
110.64	0.013927	0.008151	0.012679	0.013472	0.00173287	0.00154013	0.00328937	0.00350741
110.88	0.013828	0.008419	0.012966	0.013295	0.00188454	0.00182106	0.0028567	0.00319518
111.12	0.013916	0.008082	0.013109	0.013365	0.00174184	0.00151846	0.00294909	0.00340798
111.36	0.013794	0.008316	0.013175	0.013034	0.00217453	0.00162712	0.0030866	0.00304995
111.6	0.013949	0.00828	0.012836	0.013448	0.00137912	0.00145332	0.00299136	0.00320915
111.84	0.01384	0.008291	0.012777	0.013348	0.00183153	0.00200227	0.00299237	0.00358459
112.08	0.013667	0.008065	0.012806	0.013092	0.00174513	0.00137293	0.00327261	0.0033027
112.32	0.013811	0.008231	0.012649	0.013894	0.00140453	0.00190875	0.00301246	0.00308022
112.56	0.014193	0.008247	0.013266	0.01302	0.00190074	0.00149874	0.00327697	0.0035789
112.8	0.013717	0.008236	0.012776	0.013019	0.00152155	0.0016275	0.00324003	0.00335225
113.04	0.013741	0.008269	0.013142	0.013602	0.00155069	0.00163226	0.00321608	0.00346608
113.28	0.014092	0.008226	0.012987	0.013316	0.00164506	0.00180247	0.0030892	0.00319319
113.52	0.013592	0.008257	0.013113	0.013682	0.00167145	0.00151021	0.00350828	0.00337715
113.76	0.013696	0.008008	0.012872	0.013365	0.00159215	0.00162979	0.00314817	0.00340585
114	0.013708	0.008264	0.012985	0.01319	0.00167202	0.00167483	0.00309255	0.00350931
114.24	0.014055	0.00823	0.012934	0.01344	0.00156337	0.00177773	0.00288247	0.00323283
114.48	0.014136	0.00825	0.01312	0.012752	0.00156707	0.00175884	0.00309641	0.0033688
114.72	0.013638	0.008483	0.012928	0.013004	0.00150753	0.00167019	0.00327724	0.00336608
114.96	0.013649	0.008176	0.013313	0.013049	0.00154601	0.0019855	0.00290874	0.00330351
115.2	0.014032	0.00815	0.012967	0.013062	0.00146382	0.00187078	0.00322473	0.00337288
115.44	0.013756	0.008093	0.01285	0.01314	0.00199754	0.00169715	0.00315238	0.00326465
115.68	0.013686	0.008201	0.0128	0.012981	0.00152345	0.00161676	0.00304413	0.00315819
115.92	0.013709	0.008077	0.01299	0.013155	0.00161123	0.0017778	0.00315619	0.00337963
116.16	0.013968	0.008086	0.013049	0.013189	0.0015836	0.00165684	0.00286537	0.0033739
116.4	0.013792	0.008002	0.013067	0.013164	0.00155039	0.00143938	0.00343052	0.00339532
116.64	0.014067	0.008304	0.013084	0.01345	0.00139293	0.00194056	0.00335499	0.00312655
116.88	0.013762	0.008203	0.012854	0.013666	0.00157324	0.00184575	0.00301544	0.00323645
117.12	0.013556	0.008152	0.013312	0.013173	0.0016107	0.00161082	0.00300354	0.00341838
117.36	0.013541	0.007935	0.013198	0.013541	0.00158414	0.00119777	0.00288096	0.00344545
117.6	0.013804	0.008222	0.013047	0.013067	0.00172904	0.00165557	0.00278748	0.00313537
117.84	0.013816	0.00808	0.013067	0.013128	0.00163509	0.00142855	0.00300556	0.00339474
118.08	0.013644	0.007911	0.013304	0.013441	0.00192156	0.00151957	0.00273447	0.00350776
118.32	0.013911	0.007812	0.013093	0.013325	0.00146314	0.00155532	0.0028423	0.00380819
118.56	0.013303	0.008171	0.01335	0.013491	0.0015182	0.00160369	0.00312297	0.00348775
118.8	0.014006	0.008087	0.013023	0.013169	0.00177922	0.0017155	0.00310847	0.00334316
119.04	0.01375	0.008018	0.013094	0.013167	0.00179118	0.00183676	0.00297203	0.00324462
119.28	0.013882	0.008178	0.012765	0.013394	0.00138124	0.00145937	0.00300484	0.00329035
119.52	0.013836	0.007892	0.013121	0.013419	0.00156349	0.00124883	0.0032536	0.00350281
119.76	0.013679	0.0082	0.013478	0.013489	0.00146567	0.0017008	0.00266832	0.00362553
120	0.013733	0.007981	0.013236	0.013518	0.00175914	0.00141223	0.0032496	0.00326034
120.24	0.013613	0.008073	0.013126	0.013083	0.00183149	0.00141055	0.00321061	0.00332012
120.48	0.013955	0.007871	0.012835	0.013425	0.00148123	0.00149388	0.00340256	0.00318936
120.72	0.013602	0.00819	0.013274	0.013385	0.00168171	0.00165652	0.003062	0.00337581
120.96	0.013582	0.008147	0.013321	0.013209	0.00139633	0.00150505	0.0029553	0.00326205
121.2	0.013926	0.008166	0.013259	0.013313	0.00181239	0.00160888	0.0030768	0.00293395
121.44	0.013773	0.007826	0.013094	0.013196	0.00135533	0.00150481	0.00310657	0.00340159
121.68	0.013486	0.008174	0.013404	0.013129	0.00157039	0.00159892	0.00263258	0.00331623
121.92	0.014117	0.008385	0.013112	0.013385	0.00143063	0.00158838	0.00345447	0.00317141
122.16	0.014101	0.007969	0.012973	0.013034	0.00154078	0.0012689	0.00328245	0.00324307
122.4	0.013752	0.008041	0.01307	0.013405	0.00183312	0.00166118	0.00304285	0.00338944
122.64	0.013757	0.007803	0.013319	0.013122	0.00143194	0.00135384	0.00284115	0.00332679
122.88	0.014114	0.008288	0.013291	0.013082	0.00143068	0.00157164	0.00287899	0.00313412
123.12	0.014084	0.008245	0.013353	0.013538	0.00161865	0.00150094	0.00357584	0.00345965
123.36	0.013983	0.007872	0.0133	0.013058	0.00145418	0.00114823	0.00300865	0.00307945
123.6	0.01356	0.007896	0.013112	0.0139	0.0014211	0.00149197	0.00297967	0.00305027
123.84	0.013856	0.007781	0.013107	0.013072	0.00160842	0.00137189	0.00320781	0.00335211
124.08	0.013737	0.008048	0.013165	0.013338	0.001357	0.0012518	0.00317808	0.00335765
124.32	0.01353	0.007912	0.012916	0.013166	0.00148397	0.0013529	0.00335512	0.00328115
124.56	0.013731	0.007849	0.013128	0.013643	0.00185949	0.00145689	0.0029473	0.00320998
124.8	0.013614	0.007953	0.013187	0.013525	0.00154809	0.0015202	0.00290006	0.00334347
125.04	0.013886	0.007992	0.013125	0.013048	0.00158572	0.00150852	0.00309035	0.00329207
125.28	0.013599	0.008031	0.013267	0.013267	0.00148369	0.00133136	0.00313929	0.00306781
125.52	0.013396	0.007847	0.01321	0.013597	0.00166559	0.00146828	0.00343022	0.00330486
125.76	0.013874	0.007739	0.013462	0.013678	0.00165114	0.00143205	0.002887	0.00353025
126	0.014027	0.00763	0.013569	0.013204	0.00117765	0.00136648	0.00337132	0.00342575
126.24	0.013515	0.008028	0.013525	0.013401	0.00152385	0.00125423	0.00292209	0.0033701
126.48	0.014043	0.00795	0.013233	0.013497	0.00146181	0.00136283	0.00317326	0.00333158
126.72	0.014102	0.007923	0.0133	0.013402	0.00162086	0.00154088	0.00267287	0.00296247
126.96	0.013747	0.00784	0.013558	0.013387	0.00171056	0.00126616	0.00330593	0.00325787
127.2	0.01353	0.007786	0.013207	0.012797	0.00139809	0.00133734	0.00294436	0.00329238
127.44	0.01344	0.007947	0.013403	0.0132	0.00130037	0.00122525	0.00330566	0.00325202
127.68	0.013497	0.007706	0.013152	0.013307	0.0015497	0.00138425	0.00302935	0.00331076
127.92	0.014192	0.007878	0.013253	0.013367	0.00185223	0.00132305	0.0031309	0.00326599
128.16	0.013642	0.008028	0.013194	0.01306	0.00131714	0.00148479	0.00278844	0.00329894
128.4	0.013331	0.007784	0.013491	0.013229	0.00166123	0.00156077	0.00317828	0.00332685
128.64	0.013882	0.007697	0.013502	0.013432	0.00171012	0.00136757	0.00317407	0.00300055
128.88	0.013825	0.007884	0.013583	0.013363	0.00163909	0.00140856	0.00287489	0.00308966
129.12	0.013609	0.007954	0.013031	0.013097	0.00128935	0.000936858	0.00307391	0.00298287
129.36	0.013688	0.007908	0.013312	0.013249	0.00154499	0.00119521	0.0031346	0.00328853
129.6	0.013913	0.007843	0.013167	0.012942	0.00131122	0.00140319	0.00303728	0.00310739
129.84	0.013698	0.007907	0.013059	0.013144	0.00119156	0.00104425	0.00328137	0.0031725
130.08	0.013461	0.007984	0.013582	0.013278	0.00131165	0.0014649	0.00290764	0.00299673
130.32	0.013687	0.007531	0.013581	0.013666	0.00111671	0.00153581	0.00304919	0.0031626
130.56	0.013391	0.008089	0.013538	0.013192	0.00127713	0.00124585	0.00291049	0.00357971
130.8	0.013433	0.00786	0.01363	0.013628	0.00176983	0.0013861	0.00317703	0.00325266
131.04	0.013769	0.007705	0.01349	0.01342	0.00135571	0.00157317	0.00288808	0.00330638
131.28	0.013598	0.007429	0.013622	0.013257	0.00130486	0.00116063	0.00303814	0.00321115
131.52	0.013691	0.007758	0.01339	0.013498	0.00128008	0.00132752	0.00311043	0.0028087
131.76	0.013646	0.007913	0.013212	0.013581	0.00131494	0.0014836	0.00310946	0.00313437
132	0.013852	0.007996	0.013256	0.013582	0.00116276	0.00108027	0.00284148	0.00307626
132.24	0.013222	0.008062	0.013533	0.01303	0.00143897	0.00134701	0.00309322	0.0030336
132.48	0.013969	0.007703	0.013111	0.013046	0.00152317	0.00139788	0.00286922	0.00270929
132.72	0.014145	0.007778	0.013444	0.013414	0.00111989	0.00135083	0.00296393	0.00339614
132.96	0.013808	0.0077	0.013422	0.013456	0.0017648	0.000995822	0.00254741	0.00342096
133.2	0.01359	0.00794	0.013306	0.013424	0.00162822	0.00129656	0.00281411	0.00311714
133.44	0.013431	0.007951	0.013375	0.013045	0.00159422	0.00117099	0.00298739	0.00330293
133.68	0.013767	0.007929	0.013344	0.013356	0.00130312	0.00149234	0.00312993	0.00305894
133.92	0.01352	0.007822	0.013164	0.01312	0.00128625	0.00130644	0.00312507	0.00361652
134.16	0.01369	0.007588	0.013572	0.013413	0.00118605	0.00118522	0.00281121	0.00309074
134.4	0.013713	0.007452	0.013433	0.013331	0.00127234	0.00109978	0.00297276	0.00346972
134.64	0.013703	0.007547	0.013451	0.013258	0.00147603	0.00111342	0.00298355	0.00313557
134.88	0.013595	0.007963	0.013599	0.013169	0.00147141	0.00104639	0.00270927	0.00291967
135.12	0.01375	0.00776	0.01347	0.013327	0.00140667	0.000955623	0.00318628	0.0033032
135.36	0.013081	0.007651	0.013451	0.013195	0.00158508	0.00126563	0.00314631	0.00283782
135.6	0.013553	0.007678	0.013406	0.013217	0.00129504	0.00143192	0.002895	0.00355038
135.84	0.01368	0.008048	0.013581	0.013667	0.00137085	0.00120043	0.0027127	0.00284516
136.08	0.014196	0.007506	0.013308	0.013405	0.00128615	0.0012468	0.0031223	0.003113
136.32	0.013651	0.007747	0.013642	0.013463	0.00112755	0.00100544	0.00305262	0.0030675
136.56	0.013629	0.007873	0.01318	0.013475	0.00121073	0.0010791	0.0030393	0.00307652
136.8	0.013582	0.007816	0.013144	0.013331	0.00177987	0.00115905	0.00284124	0.00327211
137.04	0.013913	0.007802	0.013319	0.013297	0.00160151	0.00120254	0.00312854	0.00303787
137.28	0.013643	0.007507	0.013552	0.013213	0.00180442	0.00112258	0.00298418	0.00296217
137.52	0.013958	0.007494	0.013268	0.012957	0.00162417	0.00131665	0.00333201	0.00321008
137.76	0.01383	0.007847	0.013771	0.013655	0.00118165	0.00144772	0.00269019	0.00285389
138	0.013504	0.00735	0.013533	0.013207	0.0014653	0.00127053	0.00280087	0.00304603
138.24	0.013563	0.007771	0.013544	0.013651	0.00159827	0.00111473	0.00271647	0.00339105
138.48	0.013867	0.00758	0.01349	0.013596	0.00153868	0.00102674	0.00271177	0.00336906
138.72	0.013546	0.007985	0.013556	0.013444	0.00115072	0.000945661	0.00276274	0.00322616
138.96	0.013596	0.00766	0.013762	0.013642	0.0011844	0.00110312	0.0026395	0.00326852
139.2	0.013702	0.008065	0.013561	0.013269	0.000972517	0.00131172	0.00296386	0.00297016
139.44	0.014046	0.007863	0.013148	0.013093	0.00162981	0.001234	0.00326924	0.00313495
139.68	0.013279	0.007617	0.013671	0.012963	0.0011755	0.0012857	0.00309531	0.00324897
139.92	0.013738	0.00757	0.013668	0.013379	0.00133795	0.0011973	0.00281955	0.00335687
140.16	0.013437	0.007739	0.013589	0.01358	0.00146454	0.00117249	0.00293242	0.00334696
140.4	0.013769	0.007791	0.013639	0.013596	0.00113363	0.00112808	0.00312659	0.00318511
140.64	0.013402	0.007339	0.013644	0.013428	0.00141517	0.00142028	0.00284736	0.00274947
140.88	0.013498	0.00781	0.013821	0.013123	0.00145736	0.00136176	0.00290141	0.00315619
141.12	0.013328	0.007831	0.013582	0.013287	0.000898277	0.00113565	0.00299985	0.00358139
141.36	0.013518	0.007636	0.013627	0.013632	0.00141053	0.00116507	0.00282733	0.00323648
141.6	0.013554	0.007676	0.013564	0.013453	0.0012215	0.00113342	0.00296751	0.00321303
141.84	0.013739	0.007455	0.013574	0.013387	0.00124417	0.00132774	0.00271904	0.00315051
142.08	0.013706	0.007622	0.013578	0.013343	0.00127499	0.00102805	0.00295226	0.00320493
142.32	0.013931	0.007615	0.013344	0.013404	0.00152651	0.0010906	0.0029622	0.00311887
142.56	0.013624	0.00757	0.013609	0.013361	0.00127246	0.00119275	0.00280473	0.00312027
142.8	0.013903	0.007672	0.013547	0.01295	0.00129651	0.00106987	0.00285799	0.00316609
143.04	0.013459	0.007727	0.013562	0.013535	0.00127917	0.00109972	0.00286612	0.0029815
143.28	0.013685	0.007616	0.01367	0.013044	0.000960809	0.000720085	0.00276897	0.00288998
143.52	0.013748	0.007781	0.01347	0.01332	0.0011562	0.000674294	0.0027571	0.00285878
143.76	0.013389	0.007341	0.013599	0.012997	0.00111738	0.00126183	0.00292697	0.00313981
144	0.013538	0.007521	0.013573	0.013423	0.00166794	0.000992036	0.00287714	0.00303533
144.24	0.013823	0.007437	0.013476	0.013254	0.00145204	0.0010967	0.00271321	0.00306893
144.48	0.013544	0.007688	0.01372	0.013549	0.00133408	0.00138945	0.00282909	0.00293164
144.72	0.013909	0.00761	0.013948	0.012981	0.00139708	0.00126899	0.00259444	0.00235777
144.96	0.013681	0.007793	0.013747	0.012825	0.00130785	0.000945219	0.00282317	0.00313464
145.2	0.013514	0.00741	0.013686	0.013535	0.00120083	0.000938121	0.0028912	0.00306619
145.44	0.014011	0.007499	0.013482	0.013209	0.00118013	0.000892149	0.00281552	0.00328462
145.68	0.013647	0.007259	0.013689	0.013285	0.00143735	0.0011532	0.00274512	0.00327765
145.92	0.013808	0.007693	0.013848	0.013312	0.00083715	0.000895419	0.00305079	0.00290766
146.16	0.013256	0.007659	0.013649	0.013556	0.000853164	0.00108487	0.00307942	0.00330692
146.4	0.013843	0.007584	0.013585	0.01313	0.00129504	0.00123262	0.00306645	0.00295866
146.64	0.01367	0.007363	0.013671	0.013533	0.00160937	0.000881963	0.00296833	0.00294902
146.88	0.013584	0.007415	0.013675	0.013226	0.00142973	0.00125051	0.00286968	0.00278519
147.12	0.013395	0.007467	0.013731	0.012962	0.0017889	0.00133468	0.00264649	0.00295446
147.36	0.013736	0.007548	0.013655	0.013637	0.00119787	0.00115159	0.00295551	0.00322274
147.6	0.013368	0.007518	0.01363	0.013126	0.00118077	0.00103692	0.00288405	0.00314461
147.84	0.013807	0.007657	0.013666	0.013535	0.00154747	0.000912422	0.00286943	0.00257143
148.08	0.013546	0.007568	0.013724	0.013351	0.00103633	0.00100113	0.00278964	0.00315505
148.32	0.013382	0.007543	0.013823	0.013201	0.00111721	0.000828025	0.00311741	0.00297467
148.56	0.01358	0.007393	0.013516	0.013023	0.00118313	0.0012387	0.00289529	0.00317648
148.8	0.013843	0.007498	0.013864	0.013448	0.00122138	0.00111085	0.00290977	0.00298986
149.04	0.013635	0.007331	0.013873	0.013247	0.00131329	0.000917213	0.00296993	0.00318973
149.28	0.013355	0.007538	0.013584	0.013217	0.00123449	0.00119766	0.00294504	0.00324938
149.52	0.013644	0.007535	0.013672	0.013605	0.000949339	0.00100387	0.00296193	0.00273778
149.76	0.013754	0.007539	0.013844	0.013235	0.00134419	0.000657742	0.00269917	0.00318374
150	0.013468	0.007413	0.013617	0.013462	0.00134283	0.00116753	0.00270061	0.00260671
150.24	0.014495	0.007826	0.014291	0.013448	0.00120778	0.00119568	0.00284396	0.00320114
150.48	0.015361	0.007551	0.014669	0.01351	0.00152552	0.000903648	0.00277384	0.00277906
150.72	0.016348	0.007976	0.015148	0.013688	0.00107436	0.00129536	0.0028155	0.00289358
150.96	0.017127	0.008067	0.015492	0.013893	0.00132005	0.00112121	0.00247539	0.00289067
151.2	0.01726	0.00828	0.016047	0.013631	0.00146543	0.00100629	0.00291689	0.0028926
151.44	0.017871	0.008318	0.016138	0.014237	0.00104657	0.00103497	0.00285507	0.00320492
151.68	0.018631	0.008554	0.016826	0.014358	0.00113225	0.00120389	0.00282051	0.00293622
151.92	0.019293	0.008844	0.017066	0.014109	0.00122509	0.00109682	0.00299071	0.00287497
152.16	0.019548	0.009061	0.017443	0.014387	0.00157202	0.00110815	0.00267373	0.00292921
152.4	0.020137	0.008909	0.017526	0.014607	0.00137309	0.000859685	0.00269536	0.00251883
152.64	0.02031	0.009089	0.017858	0.01435	0.000876659	0.00117106	0.00304308	0.00300254
152.88	0.020647	0.009368	0.017772	0.014327	0.00116111	0.00107077	0.00255355	0.00310239
153.12	0.021374	0.00933	0.018062	0.014529	0.00131658	0.00112499	0.00300478	0.00292431
153.36	0.02167	0.009282	0.018754	0.014843	0.00147417	0.000802389	0.00277492	0.0027118
153.6	0.021572	0.009504	0.018651	0.014799	0.00167519	0.00096799	0.00308034	0.00285337
153.84	0.02254	0.009802	0.019073	0.014841	0.00120616	0.00110809	0.0027709	0.00308741
154.08	0.022544	0.009644	0.019404	0.01504	0.00129173	0.00114621	0.00321245	0.00311936
154.32	0.022699	0.009922	0.019139	0.015355	0.00155032	0.00105702	0.0026608	0.00314545
154.56	0.023283	0.010055	0.019507	0.015106	0.00131739	0.00105988	0.00305435	0.00291989
154.8	0.02369	0.00997	0.019504	0.015014	0.00150364	0.000575147	0.00293333	0.00268594
155.04	0.02348	0.009953	0.019411	0.01536	0.00163143	0.00077528	0.00323713	0.00280435
155.28	0.023606	0.010159	0.019843	0.015586	0.00144507	0.000826765	0.00295861	0.00291527
155.52	0.023589	0.010419	0.020312	0.015468	0.0012737	0.00120834	0.00280583	0.00304885
155.76	0.024613	0.010074	0.01988	0.015249	0.00133282	0.000843214	0.00278573	0.00326517
156	0.024236	0.010318	0.020323	0.015171	0.00131264	0.000992553	0.00297225	0.00320074
156.24	0.024852	0.010714	0.019911	0.015362	0.00129031	0.000898943	0.00277306	0.00327721
156.48	0.024172	0.010601	0.020561	0.015023	0.00155972	0.00088591	0.00318589	0.00315156
156.72	0.024845	0.01033	0.020746	0.015304	0.00140054	0.00106178	0.00311989	0.00263153
156.96	0.025195	0.010775	0.020797	0.015177	0.000918316	0.000966955	0.0030908	0.0032488
157.2	0.024894	0.010858	0.020987	0.015796	0.00154368	0.00114619	0.00300195	0.00266272
157.44	0.025412	0.010635	0.021041	0.015084	0.00144389	0.00121806	0.00273088	0.00313258
157.68	0.025193	0.010892	0.020877	0.015636	0.00127316	0.00098952	0.00292263	0.00317122
157.92	0.025493	0.011043	0.021229	0.015643	0.0012534	0.00109843	0.00296419	0.00278666
158.16	0.025547	0.010907	0.021502	0.015607	0.00112311	0.00102566	0.00311013	0.00296735
158.4	0.025736	0.011025	0.021336	0.015671	0.000878925	0.00120252	0.0028086	0.00289149
158.64	0.025469	0.010957	0.02129	0.015461	0.000890303	0.000601733	0.00302584	0.00287297
158.88	0.025536	0.010977	0.021528	0.015784	0.00141042	0.000815774	0.00290874	0.00301413
159.12	0.025943	0.010926	0.021629	0.01589	0.000906134	0.00105886	0.00298695	0.00298971
159.36	0.026238	0.01119	0.021242	0.015962	0.0010607	0.00112769	0.00315614	0.00269611
159.6	0.026851	0.011158	0.021367	0.01531	0.00100662	0.00135839	0.00327964	0.00294533
159.84	0.026438	0.010976	0.021508	0.015669	0.00126924	0.00119284	0.00306568	0.00318539
160.08	0.026761	0.011024	0.021694	0.015526	0.00127691	0.000968184	0.00295892	0.00266092
160.32	0.026752	0.011283	0.021586	0.016225	0.00145554	0.000915326	0.00299057	0.00273345
160.56	0.026507	0.011044	0.021835	0.015801	0.00170646	0.000969538	0.00286406	0.00272927
160.8	0.027092	0.011232	0.022143	0.01629	0.00118665	0.00112724	0.00293416	0.00344686
161.04	0.026738	0.011549	0.022236	0.015787	0.00144746	0.0011205	0.00289765	0.0029643
161.28	0.026824	0.011514	0.022154	0.016142	0.0012382	0.00074528	0.00324094	0.00270354
161.52	0.027004	0.011396	0.022396	0.015846	0.00128758	0.00125502	0.00295243	0.00281456
161.76	0.02776	0.011348	0.0218	0.015932	0.00133274	0.00138501	0.00286754	0.00320231
162	0.027072	0.011277	0.02225	0.016121	0.00141013	0.00111761	0.00291239	0.00315277
162.24	0.027162	0.011372	0.022269	0.016034	0.00108704	0.00114613	0.00283324	0.00272988
162.48	0.027296	0.011243	0.022328	0.015885	0.00108649	0.00128343	0.00289692	0.00266775
162.72	0.027076	0.011399	0.022501	0.016178	0.00150685	0.00138313	0.00259689	0.00304325
162.96	0.027226	0.011349	0.02242	0.015946	0.00113583	0.00138497	0.00293834	0.00266383
163.2	0.027275	0.01135	0.022324	0.015653	0.00133612	0.00104927	0.00301246	0.00303062
163.44	0.027238	0.011664	0.022493	0.016236	0.00146357	0.00115446	0.00308929	0.00269196
163.68	0.02745	0.011559	0.022502	0.016165	0.00128804	0.00133686	0.00274198	0.00252912
163.92	0.027825	0.011503	0.02265	0.016315	0.00119948	0.00116423	0.0028873	0.00297809
164.16	0.027555	0.01147	0.022495	0.015875	0.00129696	0.000962182	0.00301383	0.00308584
164.4	0.027754	0.011598	0.022694	0.015672	0.00108288	0.00131947	0.00262434	0.00308031
164.64	0.027285	0.011909	0.022781	0.016151	0.00108632	0.00110429	0.00275124	0.00287741
164.88	0.027814	0.011614	0.022573	0.01645	0.00124183	0.000984975	0.00297161	0.00280091
165.12	0.028137	0.011307	0.022698	0.016743	0.00107009	0.00108243	0.00332905	0.00294649
165.36	0.028474	0.011553	0.022779	0.016086	0.00117735	0.00120147	0.00287392	0.00322697
165.6	0.028067	0.011782	0.02269	0.01579	0.00158903	0.00147345	0.00278509	0.00294614
165.84	0.027806	0.011525	0.0228	0.015702	0.00131159	0.00139362	0.00265019	0.00298968
166.08	0.027918	0.011783	0.022542	0.015908	0.0012879	0.00117939	0.00319416	0.00315899
166.32	0.027906	0.011892	0.022848	0.016306	0.00102934	0.00121065	0.00330227	0.00271765
166.56	0.027829	0.011515	0.022787	0.015862	0.00145931	0.000983483	0.00305125	0.00320167
166.8	0.028257	0.011915	0.022647	0.016285	0.000963769	0.00107072	0.00310992	0.00308408
167.04	0.028224	0.011566	0.022751	0.015813	0.00129775	0.00106423	0.00305562	0.0029676
167.28	0.028172	0.011641	0.022803	0.015691	0.00146103	0.00124756	0.00300659	0.00287238
167.52	0.028223	0.011656	0.022844	0.016047	0.0012124	0.00112746	0.00316363	0.00283234
167.76	0.028221	0.011657	0.022517	0.016047	0.00132706	0.00127486	0.00306091	0.00304481
168	0.027858	0.011601	0.022954	0.016059	0.00105482	0.000959729	0.00327543	0.00274009
168.24	0.028563	0.011593	0.022864	0.016085	0.00122233	0.00134969	0.00283354	0.00321603
168.48	0.028179	0.011894	0.022968	0.01588	0.00122746	0.00123872	0.00299977	0.00310742
168.72	0.028508	0.011955	0.023009	0.016208	0.00119651	0.00109804	0.00289595	0.00281051
168.96	0.028128	0.011798	0.022587	0.016275	0.000802423	0.00125423	0.00300685	0.00281657
169.2	0.028355	0.011567	0.022795	0.01576	0.000912096	0.00128558	0.00317232	0.00283185
169.44	0.028414	0.011699	0.022936	0.016083	0.00125202	0.00119615	0.002939	0.00290665
169.68	0.027858	0.011724	0.023087	0.01601	0.000962202	0.00125593	0.00331766	0.00281207
169.92	0.028244	0.011865	0.022981	0.016191	0.00119306	0.00128998	0.00281847	0.00287438
170.16	0.028404	0.012017	0.023235	0.016363	0.00108971	0.00136102	0.00270564	0.00290146
170.4	0.02861	0.011895	0.022913	0.016284	0.00105402	0.00109282	0.00296716	0.0025959
170.64	0.028421	0.012003	0.022813	0.016203	0.00141844	0.00110286	0.00305572	0.00294264
170.88	0.028156	0.011703	0.022981	0.016473	0.00131442	0.00115299	0.00307202	0.0027053
171.12	0.028815	0.011861	0.023219	0.015892	0.0011683	0.00126362	0.00268547	0.00282452
171.36	0.028238	0.012019	0.023053	0.016163	0.00123114	0.0014002	0.00312102	0.00299161
171.6	0.028578	0.011593	0.023126	0.015885	0.000965799	0.0013499	0.00321457	0.00275836
171.84	0.029069	0.011772	0.022975	0.016534	0.00140899	0.00138895	0.00292723	0.0028465
172.08	0.028984	0.011866	0.0233	0.016093	0.000704474	0.00139809	0.00275395	0.00305343
172.32	0.028993	0.011857	0.023168	0.016882	0.00096474	0.00126134	0.00295734	0.00300312
172.56	0.028401	0.0115	0.023174	0.015928	0.00105765	0.00129803	0.00261453	0.00287092
172.8	0.028263	0.011796	0.023174	0.016529	0.00132349	0.00138813	0.00295072	0.00302534
173.04	0.028894	0.011939	0.023087	0.016041	0.00115841	0.00103505	0.00283701	0.00291748
173.28	0.028743	0.011479	0.023228	0.015748	0.00135243	0.00147102	0.00308589	0.00290209
173.52	0.02815	0.012141	0.023132	0.016053	0.00107817	0.00149309	0.00276119	0.00324606
173.76	0.028622	0.012096	0.023501	0.015797	0.000750256	0.00125721	0.00278527	0.00243603
174	0.02884	0.012024	0.023037	0.015829	0.000895704	0.00124369	0.00270741	0.00278986
174.24	0.028667	0.011944	0.023493	0.016083	0.000878144	0.00106369	0.00283348	0.00292885
174.48	0.028417	0.011936	0.023335	0.016047	0.00119392	0.00157261	0.00286434	0.00328612
174.72	0.028666	0.012001	0.022978	0.016016	0.00129155	0.00134454	0.00304478	0.00325956
174.96	0.028736	0.012017	0.023094	0.015495	0.000723777	0.00105698	0.00294307	0.00301583
175.2	0.028718	0.011828	0.023209	0.016259	0.000856657	0.00115053	0.00286539	0.00312098
175.44	0.028943	0.011976	0.023052	0.01587	0.000816354	0.00105911	0.00317475	0.00310819
175.68	0.028766	0.012198	0.023391	0.015998	0.00123917	0.00126198	0.00271818	0.002754
175.92	0.029182	0.011674	0.023474	0.015868	0.000662826	0.00116642	0.00305501	0.00300654
176.16	0.028858	0.012008	0.023164	0.016016	0.00125249	0.00106767	0.00271934	0.00294993
176.4	0.028475	0.011919	0.023225	0.015606	0.000815806	0.00127272	0.00316646	0.0026485
176.64	0.028876	0.011802	0.023393	0.016439	0.00106769	0.0012046	0.00277678	0.00284758
176.88	0.028767	0.012085	0.023431	0.015895	0.00137188	0.00117041	0.00310305	0.00309193
177.12	0.028511	0.012114	0.023065	0.016274	0.000978095	0.00122893	0.00274486	0.00290219
177.36	0.029052	0.01204	0.02295	0.016552	0.000989952	0.00122835	0.00303871	0.0030029
177.6	0.028711	0.011711	0.023357	0.016188	0.000845486	0.00113339	0.00301888	0.00293029
177.84	0.029348	0.01166	0.023133	0.015997	0.00104628	0.00128862	0.00286686	0.00300933
178.08	0.028416	0.012209	0.023345	0.016384	0.00117237	0.00121726	0.00328631	0.00254059
178.32	0.028821	0.011643	0.023096	0.015971	0.0011459	0.0014337	0.0029877	0.00320882
178.56	0.028891	0.011956	0.022835	0.016283	0.00127615	0.00152057	0.00298069	0.00302929
178.8	0.028672	0.011967	0.023005	0.015675	0.00114643	0.00141547	0.00305497	0.00269496
179.04	0.029392	0.012071	0.023275	0.015752	0.000985527	0.00158358	0.00327642	0.00280239
179.28	0.029088	0.011665	0.0232	0.016147	0.00130861	0.00140222	0.00303404	0.00276589
179.52	0.02903	0.011909	0.023071	0.016161	0.000942017	0.00141863	0.00283082	0.0029214
179.76	0.029386	0.011817	0.023222	0.016196	0.000957902	0.00120605	0.00258386	0.00286417
180	0.028965	0.011903	0.022849	0.015853	0.00109449	0.00139925	0.00297345	0.00283062
180.24	0.028634	0.011445	0.023188	0.015565	0.000851584	0.00155995	0.00315914	0.00292368
180.48	0.029135	0.012041	0.023487	0.015866	0.00095536	0.00115503	0.00291027	0.00281599
180.72	0.029101	0.011921	0.023272	0.015958	0.00084205	0.00154889	0.00287697	0.00307008
180.96	0.028759	0.011978	0.023174	0.015935	0.00105435	0.00138764	0.00276817	0.00303718
181.2	0.029207	0.011685	0.023315	0.015946	0.00104321	0.00122937	0.00318429	0.00282465
181.44	0.029228	0.011462	0.023243	0.015921	0.00124101	0.00140781	0.00269726	0.00284436
181.68	0.029397	0.011662	0.023433	0.015893	0.000980825	0.00160709	0.00285359	0.00282113
181.92	0.02919	0.011822	0.023021	0.016101	0.00100344	0.00107867	0.00293347	0.00277437
182.16	0.029117	0.01185	0.023674	0.015838	0.000931311	0.00127243	0.00293528	0.00260317
182.4	0.029669	0.011939	0.023279	0.016013	0.000909252	0.00134554	0.00284531	0.00270145
182.64	0.029205	0.011565	0.023286	0.01595	0.00118449	0.00128483	0.00262346	0.0026153
182.88	0.029234	0.012152	0.023565	0.015958	0.00124876	0.00139993	0.00289189	0.00266366
183.12	0.029309	0.011978	0.023452	0.01615	0.00120564	0.00111158	0.00285055	0.00271383
183.36	0.029097	0.012019	0.022879	0.015999	0.000733915	0.00142604	0.00291945	0.00299639
183.6	0.028961	0.011614	0.023597	0.016204	0.00101177	0.00145492	0.00307445	0.00291695
183.84	0.029196	0.011869	0.023555	0.016269	0.0013693	0.00120946	0.00304105	0.00309427
184.08	0.029397	0.01175	0.023305	0.01531	0.000971986	0.00131633	0.00295443	0.0027186
184.32	0.028729	0.011739	0.023371	0.015937	0.00115002	0.00130719	0.00294848	0.00277505
184.56	0.029242	0.011787	0.023358	0.01589	0.000929956	0.00144527	0.00277271	0.00311564
184.8	0.029106	0.011823	0.023426	0.015995	0.0009946	0.00129068	0.0028255	0.00286372
185.04	0.028994	0.011571	0.023564	0.015911	0.00127849	0.00146483	0.00272481	0.00243126
185.28	0.029441	0.011849	0.023318	0.016177	0.00112147	0.00154287	0.00275046	0.00269446
185.52	0.029351	0.011831	0.023266	0.016078	0.000959579	0.00134909	0.00266986	0.00267508
185.76	0.029575	0.01174	0.023176	0.016123	0.00125212	0.00109239	0.0030768	0.0029076
186	0.029259	0.011502	0.023078	0.015352	0.00115638	0.00152086	0.00321788	0.00276891
186.24	0.029168	0.011904	0.023291	0.015804	0.00092613	0.00147984	0.00309797	0.00276707
186.48	0.029421	0.011783	0.023432	0.015685	0.000637175	0.00142035	0.00259994	0.00280394
186.72	0.02958	0.011762	0.023253	0.015907	0.000857737	0.00136612	0.00287667	0.00269909
186.96	0.029082	0.011649	0.023672	0.015533	0.000642061	0.00134983	0.00312915	0.00297735
187.2	0.029314	0.011937	0.02328	0.015902	0.00133496	0.00166835	0.00264258	0.00237943
187.44	0.029481	0.011569	0.023393	0.015553	0.00104727	0.000996156	0.002992	0.00272437
187.68	0.029051	0.011459	0.02349	0.016399	0.000832682	0.00120981	0.0029517	0.00270087
187.92	0.028691	0.011576	0.023602	0.015898	0.000533177	0.0015627	0.00278392	0.00263128
188.16	0.029665	0.011952	0.023093	0.01552	0.000950711	0.00125327	0.00286586	0.002736
188.4	0.028812	0.011963	0.023448	0.015632	0.00124917	0.00125948	0.00281522	0.00258156
188.64	0.029098	0.011789	0.023101	0.015764	0.000957794	0.00140352	0.00267353	0.00297868
188.88	0.029021	0.01169	0.023305	0.015954	0.00114527	0.00135436	0.00275639	0.00268667
189.12	0.029489	0.011824	0.023405	0.015436	0.000943445	0.00111011	0.00294705	0.00275541
189.36	0.029057	0.011847	0.023057	0.015564	0.00113692	0.00113779	0.00266218	0.00301494
189.6	0.029259	0.011554	0.02332	0.016106	0.00126793	0.00140013	0.00289029	0.00251784
189.84	0.029414	0.01164	0.023498	0.015772	0.00124739	0.00142701	0.00248705	0.00289931
190.08	0.029315	0.011429	0.02341	0.015695	0.000785071	0.00140433	0.00285483	0.00305659
190.32	0.02886	0.011616	0.023218	0.015463	0.00100504	0.00155876	0.0031079	0.0032795
190.56	0.028977	0.011676	0.023623	0.015849	0.000952437	0.00121305	0.00278919	0.00279915
190.8	0.029351	0.011365	0.022976	0.015888	0.00132577	0.00142011	0.00316804	0.00282011
191.04	0.029373	0.011681	0.023416	0.016183	0.000776012	0.00134678	0.00277898	0.00279797
191.28	0.029062	0.011393	0.023403	0.015542	0.000880599	0.00130588	0.00296495	0.00259922
191.52	0.029419	0.011736	0.023404	0.015384	0.00121691	0.00130112	0.00279602	0.00296633
191.76	0.029337	0.011179	0.023261	0.016137	0.000743105	0.00136467	0.00297984	0.00294948
192	0.029307	0.011767	0.023289	0.015667	0.000447453	0.00133725	0.00286811	0.00252929
192.24	0.029378	0.01164	0.023232	0.016094	0.000969237	0.00142753	0.00272199	0.00283254
192.48	0.028842	0.011605	0.023345	0.015819	0.000838476	0.00128359	0.00282323	0.00251379
192.72	0.029313	0.011598	0.023549	0.015697	0.00093629	0.00128758	0.00278685	0.00292888
192.96	0.029597	0.011695	0.023255	0.015715	0.000467734	0.00128226	0.00283204	0.00318398
193.2	0.02933	0.011616	0.02371	0.015748	0.000868583	0.00133087	0.0027227	0.0027496
193.44	0.028646	0.0117	0.023589	0.015857	0.0009905	0.0011096	0.00260445	0.00283603
193.68	0.029137	0.011363	0.023616	0.01576	0.00125284	0.00117181	0.00258929	0.00294301
193.92	0.029851	0.011627	0.023222	0.015835	0.00114926	0.00133887	0.00283734	0.00266799
194.16	0.029621	0.01172	0.023443	0.015596	0.000786579	0.00141957	0.00271411	0.00263184
194.4	0.029082	0.01165	0.023131	0.015987	0.000934499	0.00131834	0.00267048	0.00267528
194.64	0.029351	0.011294	0.023275	0.015985	0.000678519	0.00140951	0.00297198	0.00264526
194.88	0.029504	0.011615	0.023205	0.016146	0.000937296	0.00119426	0.00252592	0.00287538
195.12	0.028875	0.011368	0.023167	0.015484	0.000706688	0.00138913	0.00284242	0.00236169
195.36	0.029199	0.011351	0.023117	0.015627	0.000940771	0.00149105	0.00262782	0.00245656
195.6	0.029171	0.011381	0.023377	0.015884	0.00090296	0.00134209	0.00307187	0.0024769
195.84	0.029438	0.01164	0.023112	0.015653	0.00101238	0.00115304	0.00282663	0.00269538
196.08	0.029379	0.01166	0.023088	0.015917	0.000885744	0.00138384	0.00288907	0.00267223
196.32	0.029192	0.011259	0.0229	0.015833	0.000856148	0.00109967	0.00301737	0.00277554
196.56	0.029032	0.011408	0.02326	0.015584	0.00100482	0.00142038	0.00282294	0.00290758
196.8	0.028988	0.011498	0.023302	0.015655	0.00113761	0.00112513	0.00272442	0.00266835
197.04	0.029321	0.011628	0.02332	0.015933	0.000894724	0.0015947	0.00282581	0.00279125
197.28	0.029323	0.011343	0.023182	0.015259	0.000873513	0.00147202	0.00235306	0.00264305
197.52	0.029484	0.01129	0.022948	0.015775	0.000609966	0.00128124	0.00297442	0.0028318
197.76	0.029261	0.011648	0.023359	0.015814	0.000891471	0.00146571	0.00289804	0.00282035
198	0.028871	0.011467	0.023152	0.015745	0.00080568	0.00111692	0.00260822	0.00259165
198.24	0.029155	0.011658	0.023338	0.015655	0.000715555	0.00156393	0.00286139	0.00247337
198.48	0.029189	0.011361	0.023077	0.015633	0.00123606	0.00150881	0.00257971	0.00263311
198.72	0.029566	0.011331	0.023193	0.015972	0.00100249	0.00154706	0.00297098	0.00281465
198.96	0.029363	0.011505	0.02302	0.015645	0.000730157	0.00114294	0.00272549	0.00257078
199.2	0.028677	0.011401	0.023115	0.015377	0.000730952	0.0010616	0.00261906	0.00269485
199.44	0.029249	0.011553	0.023199	0.014955	0.000755371	0.00112345	0.00305107	0.00262138
199.68	0.029473	0.011385	0.022875	0.015803	0.000465806	0.00156049	0.00289896	0.00273244
199.92	0.029832	0.011456	0.023119	0.015219	0.000623099	0.000949854	0.00271418	0.00256406
200.16	0.02926	0.011283	0.023171	0.015665	0.000846732	0.000906448	0.00286256	0.00273439
200.4	0.02882	0.01127	0.023503	0.015537	0.000845253	0.00129283	0.00294427	0.00254109
200.64	0.029044	0.011243	0.023061	0.015349	0.00085154	0.0014655	0.00266443	0.00251878
200.88	0.029028	0.011562	0.023124	0.015694	0.00109849	0.00107733	0.00276606	0.00279055
201.12	0.028893	0.011357	0.022935	0.015247	0.000737984	0.00123717	0.00261339	0.00286088
201.36	0.028953	0.011318	0.022976	0.015359	0.00087616	0.00123888	0.00254746	0.002469
201.6	0.029306	0.011481	0.023235	0.015531	0.000571091	0.00120263	0.00303004	0.0025868
201.84	0.028377	0.010987	0.022998	0.015649	0.00089308	0.00128548	0.00266656	0.0026696
202.08	0.029153	0.011317	0.023189	0.015476	0.0009445	0.00131823	0.00273659	0.00255016
202.32	0.029186	0.011467	0.02302	0.015621	0.000683261	0.00133471	0.00291151	0.00263189
202.56	0.029204	0.011456	0.022887	0.015521	0.000760832	0.00116435	0.00266192	0.0027348
202.8	0.029236	0.011455	0.022824	0.015335	0.0011268	0.00122714	0.0028811	0.00264341
203.04	0.029663	0.011352	0.023221	0.015257	0.000710551	0.00118268	0.00288098	0.00260188
203.28	0.02899	0.011449	0.022939	0.015596	0.000824625	0.00127166	0.00252388	0.00258448
203.52	0.029329	0.011311	0.023344	0.015529	0.000418934	0.0017281	0.00267328	0.00247667
203.76	0.028775	0.011328	0.023515	0.01554	0.000778359	0.00146106	0.0028518	0.00237039
204	0.029021	0.011024	0.02296	0.015307	0.000702309	0.00142734	0.00277236	0.00250419
204.24	0.029582	0.011311	0.022881	0.015205	0.00103233	0.00121713	0.00269389	0.00263906
204.48	0.02916	0.011298	0.023241	0.015679	0.000382077	0.00128535	0.00275547	0.00281677
204.72	0.029474	0.01114	0.022836	0.01566	0.000978633	0.00120127	0.00272919	0.00244264
204.96	0.028855	0.011133	0.022972	0.015607	0.000812204	0.00125105	0.00287496	0.00267335
205.2	0.029315	0.011521	0.023086	0.01535	0.000745038	0.0013904	0.00317943	0.00260748
205.44	0.02913	0.011424	0.022725	0.015312	0.000651096	0.00135762	0.00260111	0.00268399
205.68	0.029202	0.011029	0.023275	0.015538	0.000654938	0.00159617	0.00282359	0.00253222
205.92	0.029679	0.011442	0.022707	0.015378	0.000873391	0.0011902	0.00266987	0.00253552
206.16	0.029062	0.01137	0.02338	0.015072	0.000749874	0.00116463	0.00274126	0.00262188
206.4	0.029088	0.011342	0.022971	0.015338	0.000471735	0.00110159	0.00310848	0.00245107
206.64	0.029506	0.011188	0.023272	0.015281	0.000584189	0.000947759	0.00263075	0.00233867
206.88	0.029049	0.011584	0.022968	0.015437	0.00092601	0.00103224	0.00285831	0.00260711
207.12	0.029336	0.01116	0.022931	0.015429	0.000919077	0.00133599	0.0024951	0.00221439
207.36	0.02887	0.011082	0.023116	0.01555	0.000602753	0.00128134	0.00253899	0.0027791
207.6	0.028951	0.011528	0.023159	0.015344	0.000467459	0.00109551	0.00262344	0.00260364
207.84	0.029274	0.011258	0.022969	0.015417	0.000519552	0.00136466	0.00286896	0.00248212
208.08	0.029324	0.011149	0.022723	0.015418	2.9887e-05	0.00137101	0.00254417	0.00247042
208.32	0.028824	0.011105	0.022991	0.015467	0.000411524	0.00114395	0.00260453	0.00276537
208.56	0.028685	0.011326	0.023281	0.015545	0.000547776	0.00121928	0.00285621	0.00260197
208.8	0.029503	0.01148	0.023145	0.015075	0.000473973	0.00120709	0.00267176	0.00237201
209.04	0.029178	0.011202	0.022937	0.01546	0.000715044	0.000844658	0.00269797	0.00253614
209.28	0.029401	0.011266	0.02272	0.015394	0.000487422	0.00136004	0.00259627	0.00262791
209.52	0.029058	0.011133	0.02276	0.01531	0.000583952	0.00114699	0.00294922	0.00258938
209.76	0.028956	0.011297	0.022877	0.015648	0.000447262	0.00134654	0.0030151	0.0026404
210	0.028785	0.011254	0.02287	0.015212	0.000676259	0.00114011	0.00276196	0.00217527
210.24	0.029036	0.011162	0.022562	0.015442	0.00019199	0.00124652	0.0030806	0.00226635
210.48	0.029026	0.010879	0.023112	0.015386	0.000528628	0.000839421	0.00274319	0.00247849
210.72	0.028714	0.011145	0.02298	0.015564	0.000674295	0.00125003	0.00279018	0.00249059
210.96	0.029333	0.011074	0.023082	0.015634	0.000754267	0.00113681	0.00254547	0.00239624
211.2	0.029207	0.011206	0.023135	0.015296	0.000407479	0.00114401	0.00271297	0.00254056
211.44	0.029012	0.011161	0.022709	0.015073	0.00039303	0.00103746	0.0028589	0.00254935
211.68	0.029317	0.011086	0.023053	0.015343	0.000797403	0.00115341	0.00248776	0.00243095
211.92	0.029083	0.011286	0.02311	0.015326	0.00031327	0.0012463	0.00255463	0.00226661
212.16	0.029237	0.011125	0.022832	0.015072	0.000586074	0.00124742	0.00259163	0.00273939
212.4	0.029461	0.011168	0.022964	0.01538	0.000601399	0.00116653	0.0023517	0.00234001
212.64	0.029075	0.011247	0.022891	0.015226	0.000610326	0.000922279	0.00291221	0.00227976
212.88	0.028892	0.011105	0.022954	0.015485	0.000209835	0.000899802	0.0027144	0.002278
213.12	0.028882	0.011228	0.022984	0.014899	0.000629356	0.000974989	0.00285238	0.00267011
213.36	0.029113	0.010718	0.022875	0.015479	0.000768923	0.00104837	0.00237298	0.00236489
213.6	0.028945	0.010742	0.022621	0.01511	0.000463362	0.00079588	0.00266107	0.00241695
213.84	0.028824	0.011065	0.023193	0.015099	0.000541302	0.000849578	0.00263971	0.00256809
214.08	0.02854	0.010897	0.022847	0.015492	0.000715141	0.000958203	0.00256448	0.00251891
214.32	0.029496	0.011179	0.022796	0.015461	0.000839456	0.000869191	0.00261102	0.00230382
214.56	0.028922	0.011264	0.022877	0.015234	0.00119973	0.00085601	0.00262821	0.00259468
214.8	0.028945	0.01113	0.022786	0.015308	0.000555739	0.00113863	0.00283677	0.00252913
215.04	0.02864	0.010851	0.022869	0.015166	0.000464913	0.00108231	0.00255866	0.0019936
215.28	0.028824	0.011105	0.022846	0.015314	0.000454273	0.000999667	0.00282667	0.00245034
215.52	0.028962	0.010729	0.022837	0.015496	0.000678445	0.00128405	0.00263266	0.00239097
215.76	0.029504	0.011149	0.022792	0.015535	0.000588954	0.00126052	0.00247414	0.00242959
216	0.028774	0.011113	0.022858	0.015289	0.000400033	0.00112079	0.00271351	0.00250738
216.24	0.029313	0.011293	0.023059	0.015444	0.000480554	0.00092628	0.00245111	0.00264619
216.48	0.028856	0.011068	0.022758	0.014997	0.000497472	0.00106513	0.00288541	0.0022924
216.72	0.028828	0.011128	0.022994	0.015204	0.000468023	0.00106892	0.00234598	0.00239363
216.96	0.028566	0.010772	0.022652	0.015248	0.000793294	0.00102175	0.00264638	0.00242303
217.2	0.028627	0.011202	0.022878	0.015352	0.000470989	0.00111102	0.00261836	0.00219388
217.44	0.028832	0.010943	0.022519	0.015418	0.000673627	0.000862911	0.00240461	0.00217818
217.68	0.028709	0.010884	0.022913	0.014785	0.000604121	0.00122227	0.0026662	0.00236011
217.92	0.02795	0.011088	0.022603	0.015192	0.000332473	0.000936137	0.00212238	0.0022759
218.16	0.028948	0.010885	0.022725	0.01555	0.000863427	0.00120283	0.00281028	0.00248972
218.4	0.028394	0.011283	0.02268	0.015166	0.000431749	0.0011087	0.00271282	0.00231374
218.64	0.028834	0.011006	0.022586	0.015148	0.000476352	0.0012062	0.00269058	0.00218426
218.88	0.029045	0.01087	0.022691	0.01529	0.000565211	0.00109086	0.00243026	0.00231377
219.12	0.028416	0.011117	0.022793	0.015327	0.000439525	0.000798912	0.00298049	0.00246093
219.36	0.028791	0.010631	0.022721	0.015071	0.000759661	0.0008206	0.00257378	0.00217107
219.6	0.028831	0.010963	0.022594	0.014911	0.00085587	0.00105176	0.00239279	0.00269293
219.84	0.029041	0.010911	0.022587	0.015555	0.000530898	0.00118761	0.00248416	0.0021362
220.08	0.028522	0.010891	0.022818	0.014724	0.000369953	0.00111634	0.00276604	0.00261962
220.32	0.028749	0.01094	0.023022	0.015149	0.000879771	0.00117195	0.00266679	0.00224748
220.56	0.029159	0.011095	0.022715	0.014988	0.000768723	0.00114586	0.00236638	0.00221292
220.8	0.028864	0.010741	0.02269	0.014913	0.00038681	0.00104064	0.00255057	0.00227611
221.04	0.028558	0.010797	0.022618	0.015154	0.000237898	0.000922316	0.00247024	0.00216019
221.28	0.028982	0.010791	0.022674	0.015111	0.00057004	0.000743222	0.00258219	0.00223281
221.52	0.028465	0.010877	0.022535	0.015204	0.000448827	0.000859424	0.00263247	0.0020771
221.76	0.028619	0.01098	0.022749	0.014693	0.000450522	0.00105611	0.0024858	0.00227508
222	0.028444	0.010789	0.022367	0.015181	0.000423094	0.00111191	0.00241707	0.0018873
222.24	0.029158	0.010925	0.022618	0.014866	0.000568287	0.00111815	0.00255642	0.0024968
222.48	0.028562	0.010944	0.022749	0.014979	7.00949e-05	0.00119705	0.0024076	0.0023208
222.72	0.028831	0.011034	0.022727	0.014914	0.00045575	0.000763138	0.00241179	0.00224978
222.96	0.028285	0.010469	0.022673	0.014563	0.000408347	0.000757422	0.00255067	0.00219288
223.2	0.029045	0.010681	0.022562	0.014811	0.000561699	0.00114581	0.00244198	0.00219702
223.44	0.028307	0.010573	0.022296	0.015073	0.000404087	0.00092346	0.00264497	0.00203464
223.68	0.028341	0.010815	0.022923	0.014823	0.000762853	0.000989931	0.00213192	0.00251017
223.92	0.028262	0.010694	0.022571	0.014628	0.000429885	0.000942718	0.00278708	0.00223882
224.16	0.028661	0.010899	0.022839	0.0151	0.000404954	0.00111924	0.00237354	0.0023505
224.4	0.028631	0.010949	0.022453	0.015072	0.000436046	0.00131888	0.00248223	0.00232786
224.64	0.028601	0.01096	0.022903	0.015319	0.000626476	0.00121017	0.00271419	0.00216619
224.88	0.028501	0.010741	0.022544	0.015081	0.000470574	0.000882192	0.00260308	0.00268078
225.12	0.028197	0.010837	0.022736	0.014994	0.000570626	0.000975006	0.0028288	0.00251191
225.36	0.02806	0.010373	0.022624	0.015171	0.000582445	0.00131414	0.0025753	0.00213649
225.6	0.028902	0.010849	0.022551	0.015153	0.000456542	0.000978048	0.00226181	0.00211932
225.84	0.028854	0.010543	0.022407	0.015397	0.000653863	0.000660027	0.00255046	0.00201813
226.08	0.028596	0.010802	0.022663	0.014682	0.000191815	0.000991387	0.00237308	0.00197972
226.32	0.028855	0.010617	0.022259	0.014896	0.000193243	0.00112084	0.00220293	0.00231517
226.56	0.028761	0.01066	0.022587	0.014996	0.00057345	0.000935358	0.00227767	0.00223668
226.8	0.028427	0.010702	0.02265	0.01485	0.000407501	0.000621259	0.00259322	0.00219276
227.04	0.028878	0.010548	0.022477	0.015433	0.00041028	0.00080488	0.0023669	0.00243648
227.28	0.02845	0.01057	0.022748	0.015238	0.000209233	0.00124365	0.00260752	0.00242256
227.52	0.028638	0.011005	0.022685	0.015086	0.000717014	0.00094432	0.00227446	0.00229745
227.76	0.028563	0.010777	0.022678	0.014518	0.000381677	0.00107517	0.00234446	0.00265613
228	0.028262	0.01089	0.022776	0.015249	0.000380922	0.00087337	0.00246521	0.00210293
228.24	0.028398	0.010746	0.02245	0.014737	0.000438277	0.000842163	0.00256772	0.00221489
228.48	0.028316	0.010521	0.022856	0.014876	0.000410878	0.000972688	0.00236768	0.00208428
228.72	0.028219	0.01074	0.022511	0.014437	0.000420096	0.000694603	0.00251724	0.00231782
228.96	0.02869	0.010503	0.022453	0.014775	0.000548623	0.00099303	0.00234461	0.00203553
229.2	0.027909	0.010664	0.022915	0.01503	0.00052804	0.00106951	0.00250105	0.00208984
229.44	0.028371	0.010484	0.02251	0.015019	0.000337485	0.000712524	0.00239366	0.00222877
229.68	0.028723	0.010505	0.022518	0.014661	0.000352679	0.000738917	0.0020507	0.00220961
229.92	0.028694	0.010725	0.022634	0.014681	0.000357715	0.000975932	0.00249176	0.00213918
230.16	0.028052	0.010165	0.022507	0.015272	0.000585754	0.000934128	0.00247474	0.00222412
230.4	0.028259	0.010527	0.022557	0.014525	0.000468321	0.00109035	0.00255228	0.00202243
230.64	0.028328	0.010462	0.022465	0.015053	0.000526581	0.000610761	0.00236337	0.00220018
230.88	0.02869	0.010542	0.022388	0.014396	0.000337485	0.00104213	0.00251136	0.00232162
231.12	0.028313	0.010704	0.022528	0.015018	0.000143608	0.00102363	0.0024554	0.00194178
231.36	0.028358	0.010334	0.022509	0.014928	0.000656903	0.000879671	0.00224571	0.0018852
231.6	0.028986	0.010603	0.022443	0.014969	-9.64989e-05	0.000747137	0.0023925	0.00250803
231.84	0.027907	0.010555	0.02251	0.014812	0.000217988	0.000940528	0.00223246	0.00235945
232.08	0.028016	0.010428	0.022242	0.014668	0.000442777	0.00100623	0.00255479	0.00259691
232.32	0.028254	0.010308	0.021993	0.01461	0.000546529	0.000728635	0.00248281	0.00223623
232.56	0.02818	0.010467	0.022303	0.014801	0.000382298	0.000792615	0.00245113	0.00226287
232.8	0.0282	0.010481	0.022355	0.014734	0.000262932	0.000757161	0.0024103	0.00186972
233.04	0.028423	0.010552	0.022316	0.015063	0.000572318	0.00100211	0.0026245	0.00222605
233.28	0.028155	0.010221	0.022284	0.014571	0.000409702	0.00103582	0.00253773	0.00212101
233.52	0.028341	0.01014	0.02239	0.014592	0.000243701	0.000660688	0.0026096	0.0022868
233.76	0.028262	0.010263	0.022387	0.015045	0.000537046	0.000953998	0.00245684	0.00205103
234	0.028228	0.010503	0.022098	0.014757	0.000294667	0.00103981	0.00236008	0.00198292
234.24	0.028091	0.010677	0.022574	0.014632	0.000185425	0.000682275	0.00222637	0.00211894
234.48	0.02779	0.01039	0.022265	0.014614	0.00052125	0.00093647	0.00246609	0.00209494
234.72	0.028124	0.010413	0.022438	0.014815	0.000172232	0.000980055	0.00253227	0.00229115
234.96	0.027893	0.010467	0.022505	0.014785	0.000672142	0.000720988	0.00217338	0.00203883
235.2	0.028254	0.010424	0.022235	0.014666	0.000212863	0.000606985	0.00265679	0.00190888
235.44	0.028405	0.010736	0.022184	0.014704	0.000261092	0.000930384	0.00222427	0.00184083
235.68	0.028386	0.010335	0.022277	0.01459	0.000398783	0.000911825	0.00223114	0.00194858
235.92	0.028333	0.010507	0.022528	0.014551	0.000541136	0.000988449	0.00252498	0.00208215
236.16	0.028061	0.010873	0.022293	0.014568	0.000255553	0.000930867	0.00224619	0.00204022
236.4	0.027952	0.010511	0.022352	0.014367	0.000467667	0.000897644	0.00235057	0.00251722
236.64	0.027901	0.010303	0.022166	0.014375	0.000382041	0.000693661	0.00211884	0.00195304
236.88	0.027782	0.010491	0.02253	0.014534	0.000535801	0.0012336	0.00235032	0.00195943
237.12	0.028363	0.010126	0.022148	0.014582	0.000299555	0.000789796	0.00227967	0.00227036
237.36	0.027713	0.010374	0.02219	0.014833	0.000214903	0.00063015	0.00246929	0.00212529
237.6	0.027572	0.010346	0.022148	0.01464	0.000428889	0.000839701	0.0022969	0.00237009
237.84	0.02805	0.010232	0.022157	0.014844	8.9448e-05	0.000543759	0.00227392	0.00203661
238.08	0.028006	0.010513	0.022126	0.014349	0.000501851	0.000561886	0.00256265	0.00195756
238.32	0.028251	0.010416	0.022277	0.014867	0.000664625	0.000988061	0.00245212	0.00195406
238.56	0.02818	0.010082	0.022135	0.014511	0.000646486	0.000711421	0.00231557	0.00211838
238.8	0.028421	0.010308	0.02229	0.014682	0.000248915	0.000650301	0.00249103	0.00193913
239.04	0.028113	0.010424	0.022087	0.014739	6.86923e-05	0.000971613	0.00202643	0.00191611
239.28	0.027756	0.010142	0.022184	0.014475	0.000311552	0.000658738	0.00241769	0.00226938
239.52	0.027924	0.010263	0.021982	0.014402	0.000327832	0.000854445	0.00267602	0.00189924
239.76	0.028438	0.010528	0.022493	0.014317	0.000238184	0.000984935	0.00228373	0.00186056
