# Supplementary material for: Complementary biosensors reveal different G-protein signaling modes triggered by GPCRs and non-receptor activators
Source: eLife. 2021 Mar 31;10:e65620. doi: 10.7554/eLife.65620 (PMC8034979; doi:10.7554/eLife.65620)
Supplement: Figure 2—figure supplement 2—source data 1. [file elife-65620-fig2-figsupp2-data1.xlsx]

## Sheet: GIV GBA
Time	Exp1	Exp2	Exp3	Exp4
0	0.000104341	-1.0864e-05	0.000325491	0.000207973
0.24	0.000241936	1.79709e-05	0.000236585	0.00036977
0.48	0.000302433	-0.000131595	0.000292655	0.000467753
0.72	0.000125171	8.07054e-05	0.000592708	0.000412717
0.96	7.86047e-05	-1.79786e-06	5.38756e-05	0.000120576
1.2	-8.02042e-05	0.000538284	0.000802813	8.95258e-05
1.44	-8.60902e-06	0.000137136	9.62176e-05	0.000226773
1.68	0.000623467	-0.000447273	0.00042289	0.000366109
1.92	0.000313467	9.35441e-05	0.000299491	0.000314279
2.16	0.000195269	-3.75451e-05	0.000516131	9.79138e-05
2.4	4.73134e-05	-3.55687e-05	0.000326146	0.000453002
2.64	0.000506646	0.000274688	0.000185587	0.000188578
2.88	0.000100271	-4.3005e-05	0.000554441	-9.25488e-05
3.12	-5.29294e-05	-4.4424e-07	-0.000107072	1.61595e-05
3.36	0.000191026	0.00013033	0.000128891	0.000370138
3.6	0.00029806	0.000420511	0.00059262	0.000375391
3.84	0.000468395	0.000124267	0.000229117	-3.28662e-06
4.08	0.000137838	0.000649379	-4.31572e-05	6.79768e-05
4.32	5.05232e-05	0.000341309	0.000276901	0.000298194
4.56	0.000207315	0.000509528	-0.000221077	6.47412e-05
4.8	0.000109943	-0.000282013	3.51372e-05	-0.000303529
5.04	-0.000131955	0.000141618	0.000147244	4.20038e-05
5.28	-0.000145789	0.00023754	-0.000610753	0.000139972
5.52	-0.000232411	0.00013033	0.00048747	-3.19118e-05
5.76	0.000210432	-0.000256562	-0.000397803	0.000167882
6	0.000264968	-0.00018831	-0.000111745	0.000123079
6.24	-9.50049e-05	0.000483312	1.77125e-05	0.000202936
6.48	0.000212569	0.000143065	0.000205045	-0.000214603
6.72	3.57783e-05	-0.000177915	0.000127779	0.000218511
6.96	0.00018377	-0.000401029	-0.000399408	0.000258844
7.2	-0.000224383	1.98231e-05	-9.69691e-05	0.000158787
7.44	0.000302382	0.000427973	7.84035e-05	0.000237401
7.68	-0.000216598	0.000226359	-1.50298e-05	4.43943e-05
7.92	-0.000186357	0.000155007	0.000245369	-2.49803e-05
8.16	0.000300129	0.000109084	0.000360592	0.000213379
8.4	9.4223e-05	0.000310188	0.000207468	0.000169841
8.64	0.000173646	-9.07789e-05	-0.000133102	5.34743e-05
8.88	-0.000163584	8.97679e-05	-0.000128993	0.00026742
9.12	0.000183591	0.000102863	0.000499895	-6.27768e-05
9.36	0.000298401	-0.000134344	-0.000512959	-7.77884e-05
9.6	0.000201071	-9.22655e-05	0.000224317	-6.02516e-05
9.84	0.000100642	0.000140202	8.21025e-05	0.000305222
10.08	-0.000222082	3.65624e-05	0.000435948	0.000333093
10.32	0.000313513	2.83481e-05	0.00021991	2.80277e-05
10.56	0.000139184	7.18481e-05	0.000394294	-5.85216e-05
10.8	0.000162634	-0.00026479	-6.34952e-05	-7.21687e-05
11.04	-0.000110138	0.000309146	0.000643543	-3.12016e-05
11.28	0.000152492	-0.000359895	9.31831e-06	9.56479e-05
11.52	-0.000102338	8.45359e-05	-0.000251971	-3.19616e-06
11.76	0.000114815	-8.3315e-05	0.000141547	-0.000101705
12	4.53946e-05	-0.000167361	0.000146394	0.000124287
12.24	0.000154518	1.98501e-05	-0.000229164	-0.000149211
12.48	3.09368e-06	0.000182523	-5.6406e-05	0.000164004
12.72	-0.000244925	-2.37081e-05	0.000263737	1.35368e-05
12.96	-4.49666e-05	6.09353e-05	0.000247385	1.22971e-05
13.2	8.50088e-05	0.000167486	0.000150589	7.92907e-05
13.44	0.000108931	2.08048e-05	0.000133683	0.000235701
13.68	0.000174252	-0.000335476	0.00017108	-4.19719e-05
13.92	0.000356328	-0.000268228	0.000280783	-6.35445e-05
14.16	-1.31613e-05	-0.000162814	0.000120863	0.00026115
14.4	4.95483e-05	8.0101e-05	0.000430342	0.000421578
14.64	0.000137495	7.86992e-06	-7.53635e-05	-0.000324085
14.88	1.494e-05	-3.52723e-05	-2.7733e-05	0.000189431
15.12	0.00027502	0.00012165	-0.000142481	-0.000238939
15.36	-9.78437e-05	-0.000111951	7.72593e-05	0.000236454
15.6	-5.46554e-05	5.40447e-05	-0.000244911	0.00019794
15.84	8.96237e-05	9.66683e-05	-7.08929e-06	4.33122e-05
16.08	-0.000109782	-6.96015e-05	-0.00068912	8.37636e-05
16.32	-5.71716e-05	-1.53245e-05	-0.000477444	-2.13451e-05
16.56	-7.58832e-05	-0.000298649	0.000118573	-0.000311726
16.8	4.76894e-05	0.000163784	0.000173479	-0.000121234
17.04	-0.000135707	0.000226833	-0.000305861	-6.12651e-05
17.28	-0.000283105	0.000233639	-0.000207495	-4.94674e-05
17.52	-0.000304628	7.06032e-05	-4.39625e-05	-0.000171044
17.76	8.17516e-05	1.50794e-05	0.000167005	-1.21768e-05
18	-0.000248106	0.000214875	0.00024864	-0.000114838
18.24	0.000180734	-7.7976e-05	0.000302101	3.53883e-05
18.48	-0.000138977	-7.02746e-05	0.000113617	5.94688e-05
18.72	-4.53625e-05	0.000295404	0.000106356	1.96934e-05
18.96	-5.8914e-05	0.00018097	7.0859e-05	-4.96646e-05
19.2	-0.000109779	-0.000163497	-0.000514006	-0.000175197
19.44	-0.000127848	7.68648e-05	4.24174e-05	0.000120878
19.68	1.9631e-05	0.00013791	-0.000149211	-0.00022702
19.92	0.000101864	-0.000277931	-0.000141349	-0.000165404
20.16	9.46314e-05	-0.000155537	-0.000455987	-0.000151962
20.4	-4.30995e-05	0.000125776	0.000178898	-8.24585e-05
20.64	-0.000358537	-0.000326502	8.86563e-05	5.69281e-06
20.88	-0.000177913	0.000253146	-0.00075497	8.29065e-06
21.12	-1.19356e-05	3.1201e-05	0.000116173	-0.0001258
21.36	-0.000203692	-0.000284523	0.000145647	7.63219e-05
21.6	-3.69642e-05	6.24722e-05	0.000489054	-0.00029897
21.84	-0.000201123	-0.000310182	0.000172978	0.00011033
22.08	1.71313e-05	0.00032218	-0.000380406	6.64679e-05
22.32	-1.47083e-05	0.00012486	0.000245478	-0.000146412
22.56	-0.00015998	-0.000267805	-0.000401289	-0.000143896
22.8	-0.000329851	-0.000231491	-0.000513894	-0.000198139
23.04	-0.000381912	-0.000158085	-0.000354732	-0.00016542
23.28	-0.000362945	-0.000192696	3.25814e-05	-0.000421168
23.52	0.000148086	0.000152001	-0.000306287	-0.00025517
23.76	-0.000282723	0.000247679	3.50808e-07	-1.42971e-05
24	-0.000325132	0.000319233	-0.000137835	-0.000122388
24.24	-6.75491e-05	3.18503e-05	-0.000151326	7.15703e-05
24.48	-0.000161671	-0.000133308	0.000220561	-0.000165402
24.72	0.000247106	-0.000271947	-0.000605483	-0.000106639
24.96	8.93435e-05	0.000123644	-0.000146824	-0.000136786
25.2	-0.000147574	-6.00124e-05	-0.000156801	-0.000275226
25.44	-0.000223135	-0.000126328	-0.000305692	-0.00039626
25.68	-4.90511e-05	7.82755e-05	-1.51195e-05	0.000144367
25.92	-4.39609e-05	-0.000264234	-0.00014577	-0.000381351
26.16	4.59832e-05	-0.00030254	-0.000681086	-0.000201246
26.4	0.000197269	-0.000249181	-0.000628017	-0.000372527
26.64	-0.000310611	-0.000258157	-7.93416e-05	-0.000281359
26.88	-0.000257286	-7.89272e-06	-0.000371976	-0.000307354
27.12	-0.000128255	0.000117054	-8.92027e-05	-0.000164091
27.36	-0.000418941	-0.000289455	-0.000378072	-2.64809e-06
27.6	3.35448e-05	-0.000545371	-0.000315633	-2.21347e-06
27.84	3.59662e-05	-7.03945e-05	-0.00028681	-0.000140402
28.08	-8.368e-05	-0.000620808	5.67138e-05	-0.0001199
28.32	-4.58542e-05	-6.27706e-05	-0.000357315	-0.000258862
28.56	-0.00024445	-0.000499952	-0.000163656	-0.000342048
28.8	-0.000262167	0.000134906	-9.36678e-05	-0.000192781
29.04	6.14537e-05	2.26239e-05	-0.000265261	1.88205e-05
29.28	-8.84006e-05	-2.73044e-06	-0.000378112	-0.000304232
29.52	-0.000395726	-7.93631e-05	-0.000439261	-0.000426529
29.76	-0.000500573	-0.000251382	0.000157045	-0.000226979
30	-0.000415383	-0.00013191	-0.000124268	-0.000176889
30.24	-0.000159572	0.000425026	-0.000729633	-2.89218e-05
30.48	-7.25327e-05	0.000439179	1.65477e-05	-0.000210275
30.72	-0.0113676	-0.00941255	-0.011127	-0.0104254
30.96	0.0233303	0.0377608	0.0310831	0.0330831
31.2	-0.067723	-0.0556333	-0.0643926	-0.0618831
31.44	0.152051	0.131258	0.144965	0.14296
31.68	0.01903068*	0.01516694*	0.01770979*	0.01782759*
31.92	0.00138683	0.00054953	0.000430142	0.00140196
32.16	0.00138488	0.0014207	0.000657291	0.0016544
32.4	0.00175135	0.00100466	0.000786431	0.00224781
32.64	0.00238113	0.00162929	0.00129351	0.00222168
32.88	0.00226661	0.00158004	0.00151009	0.00255103
33.12	0.00271692	0.00234546	0.00140445	0.00279978
33.36	0.00300384	0.00276242	0.00220658	0.00328229
33.6	0.00351012	0.00267314	0.00162148	0.00329088
33.84	0.00352391	0.00238667	0.00182968	0.00352291
34.08	0.0040123	0.00273734	0.00229988	0.00393731
34.32	0.00413345	0.00283933	0.00256475	0.00417591
34.56	0.0045743	0.00310141	0.00232329	0.00432201
34.8	0.00456282	0.00322399	0.00263353	0.00467852
35.04	0.0049496	0.00330799	0.00296308	0.00481737
35.28	0.00509071	0.00370264	0.00345432	0.00503773
35.52	0.00553756	0.00438279	0.00318642	0.00529877
35.76	0.00559705	0.00384202	0.00320554	0.00518752
36	0.00584033	0.00408156	0.00380396	0.00575704
36.24	0.00567782	0.00389596	0.00398719	0.00555545
36.48	0.00642983	0.00436211	0.00364857	0.00579215
36.72	0.00647342	0.00485086	0.0038978	0.00581045
36.96	0.00624551	0.00484149	0.00407844	0.00608444
37.2	0.00645553	0.00476589	0.0045734	0.00620967
37.44	0.00646578	0.00493969	0.00512066	0.0064998
37.68	0.00691172	0.00564065	0.00476622	0.00670198
37.92	0.00709132	0.00506455	0.00483774	0.00683311
38.16	0.00717325	0.00542205	0.00520545	0.00730522
38.4	0.00722984	0.00567786	0.00512301	0.00721013
38.64	0.00767276	0.00608653	0.00488338	0.00729779
38.88	0.00758766	0.00577651	0.0050769	0.0074272
39.12	0.00756829	0.00550732	0.00550831	0.00731147
39.36	0.00771792	0.00657944	0.00566076	0.00765578
39.6	0.00781603	0.00599031	0.00563135	0.0075864
39.84	0.00825227	0.00635447	0.00590386	0.00794508
40.08	0.00846013	0.00617206	0.00635744	0.00767336
40.32	0.0084578	0.00641918	0.00558093	0.00803689
40.56	0.00829125	0.00665891	0.00673319	0.00800169
40.8	0.00867194	0.00669461	0.00674127	0.0081264
41.04	0.00884518	0.00708817	0.00649652	0.00798397
41.28	0.00898899	0.00654256	0.00688659	0.00832499
41.52	0.00897373	0.00736226	0.00627946	0.00831863
41.76	0.00886725	0.0067285	0.00661839	0.00860617
42	0.00915361	0.00693745	0.00712988	0.008507
42.24	0.00911833	0.00788545	0.00670704	0.00875572
42.48	0.00917271	0.00721947	0.00625063	0.00853982
42.72	0.00917105	0.00708344	0.00744204	0.00875019
42.96	0.00906974	0.0074511	0.00723653	0.00903151
43.2	0.00926395	0.00690594	0.00734958	0.00876066
43.44	0.00946543	0.00719238	0.0073928	0.00908831
43.68	0.00942344	0.00780672	0.00753351	0.00902761
43.92	0.00977542	0.00742085	0.00754417	0.00926242
44.16	0.00975718	0.00840761	0.00764791	0.00930927
44.4	0.0096411	0.00797559	0.00772895	0.00939109
44.64	0.00957185	0.00760821	0.00782516	0.00911832
44.88	0.00996111	0.00786146	0.0081603	0.00934791
45.12	0.00979705	0.00795126	0.00768606	0.00942715
45.36	0.0101902	0.00822721	0.0075008	0.00940731
45.6	0.00995371	0.00851683	0.00744023	0.00985068
45.84	0.0103137	0.00815717	0.00836645	0.00947152
46.08	0.0100619	0.00787267	0.0075438	0.0096443
46.32	0.0102018	0.00821445	0.0074993	0.00984715
46.56	0.0103594	0.00799529	0.00829857	0.00965136
46.8	0.0100917	0.00835789	0.00817152	0.00976049
47.04	0.0102822	0.00848519	0.00860783	0.00981699
47.28	0.0102982	0.00821959	0.00846937	0.00984247
47.52	0.0105658	0.00864556	0.00841612	0.0095899
47.76	0.0106275	0.00850777	0.00855506	0.00991152
48	0.010931	0.00861799	0.00906319	0.00998179
48.24	0.0107079	0.00885449	0.00862182	0.00994345
48.48	0.0108064	0.008774	0.00889442	0.0102424
48.72	0.0110401	0.00874578	0.00847416	0.0100359
48.96	0.0105803	0.00856139	0.00871336	0.0101124
49.2	0.0109272	0.00928875	0.00872356	0.0100452
49.44	0.0108106	0.00855002	0.00879562	0.0101921
49.68	0.0111514	0.00866926	0.0087369	0.0101893
49.92	0.0112397	0.00899723	0.0089387	0.0102826
50.16	0.0110443	0.00878272	0.00892541	0.0104556
50.4	0.0112698	0.00899081	0.00895976	0.0104905
50.64	0.0111027	0.00908075	0.00951995	0.0106418
50.88	0.0112982	0.00891297	0.00892415	0.0105325
51.12	0.0112305	0.00843633	0.0090319	0.0106731
51.36	0.0113647	0.00946715	0.00917155	0.0106101
51.6	0.0115361	0.00878176	0.00943313	0.0106576
51.84	0.0113345	0.0090211	0.00964555	0.0104665
52.08	0.0112373	0.00965448	0.00925051	0.0103741
52.32	0.0113508	0.00953069	0.00906395	0.0104673
52.56	0.0118131	0.0100135	0.00914267	0.0107895
52.8	0.011714	0.00989453	0.00973054	0.0106248
53.04	0.0111432	0.0100984	0.00980004	0.0106539
53.28	0.0117518	0.00902341	0.00932038	0.0107187
53.52	0.0116577	0.00896107	0.0096112	0.0106942
53.76	0.0118041	0.00976795	0.0100691	0.0106765
54	0.0118167	0.00972185	0.00941645	0.0112678
54.24	0.0113942	0.00943823	0.0096141	0.0111071
54.48	0.0117497	0.00986575	0.00935922	0.0109414
54.72	0.0116897	0.0094999	0.00934067	0.0108252
54.96	0.0119117	0.0102841	0.0097293	0.0113076
55.2	0.0121697	0.00938169	0.0105122	0.010943
55.44	0.0116998	0.00977309	0.0104583	0.01072
55.68	0.0117307	0.0100989	0.0103535	0.0112194
55.92	0.0121625	0.00982865	0.00977434	0.0109514
56.16	0.0118735	0.0101167	0.0096777	0.0110408
56.4	0.0118614	0.00992593	0.0095606	0.0111873
56.64	0.0117807	0.00979529	0.0104351	0.0110663
56.88	0.0119554	0.00991269	0.01024	0.0111263
57.12	0.0116857	0.0101689	0.00962015	0.010854
57.36	0.0120555	0.00990819	0.0101578	0.0111038
57.6	0.011882	0.00951675	0.00990066	0.0112004
57.84	0.0121572	0.00927051	0.0101309	0.0110284
58.08	0.0121795	0.00987209	0.0108352	0.0113291
58.32	0.0120935	0.00988537	0.0101753	0.0112936
58.56	0.0122402	0.00954847	0.0108082	0.0110248
58.8	0.0119569	0.00998445	0.0102335	0.0112957
59.04	0.0123113	0.00978103	0.010191	0.0114864
59.28	0.0122714	0.00988327	0.0104168	0.0111909
59.52	0.0122352	0.0103097	0.0103849	0.0112065
59.76	0.0123942	0.00997921	0.0101316	0.0117713
60	0.0120302	0.00970463	0.0103782	0.0116299
60.24	0.0125227	0.0103712	0.0100738	0.0113479
60.48	0.0124868	0.0106742	0.0106276	0.0115255
60.72	0.0125472	0.00982587	0.0105267	0.011759
60.96	0.0125517	0.0100981	0.00996211	0.0118873
61.2	0.0122019	0.0103289	0.0105552	0.0114361
61.44	0.0124024	0.00986975	0.010655	0.0113239
61.68	0.0123847	0.0106198	0.010291	0.0115961
61.92	0.0125152	0.0103474	0.0112735	0.0121539
62.16	0.0121472	0.0101104	0.0106498	0.0114841
62.4	0.0125361	0.0101724	0.0107583	0.0113252
62.64	0.0124613	0.0103976	0.0111242	0.011707
62.88	0.0123204	0.0100047	0.0104317	0.0117671
63.12	0.0120153	0.0100816	0.0113479	0.011773
63.36	0.0124103	0.0101672	0.0107185	0.0115294
63.6	0.0127584	0.0108605	0.0110488	0.0116684
63.84	0.0123935	0.0103324	0.0106495	0.0118916
64.08	0.0126628	0.0103233	0.0108548	0.0115393
64.32	0.0124307	0.0104138	0.0104752	0.0119343
64.56	0.0122819	0.0108286	0.0108398	0.0117276
64.8	0.0124794	0.0109663	0.0103075	0.0119825
65.04	0.0121977	0.0103417	0.0109654	0.0116362
65.28	0.0127162	0.0101119	0.0106605	0.0119669
65.52	0.0128433	0.0106174	0.0111027	0.0119757
65.76	0.0126273	0.00983946	0.0107094	0.0121948
66	0.0128105	0.010143	0.0112612	0.0119339
66.24	0.0125005	0.0101012	0.0112645	0.0118401
66.48	0.0125976	0.0110248	0.0107087	0.0120366
66.72	0.0123895	0.0111153	0.0110446	0.0120487
66.96	0.0128566	0.0106494	0.0110874	0.0121554
67.2	0.0128138	0.0104953	0.0107971	0.0120076
67.44	0.0122842	0.0103509	0.0112294	0.0120601
67.68	0.0126252	0.0107793	0.0112022	0.0120737
67.92	0.0125167	0.0109329	0.0111819	0.0121399
68.16	0.0124867	0.010302	0.0108648	0.012095
68.4	0.0130031	0.0105612	0.0111377	0.0120422
68.64	0.012762	0.0102489	0.0111723	0.01217
68.88	0.0126796	0.0107692	0.0117164	0.0120122
69.12	0.0124548	0.0107915	0.0109845	0.0122744
69.36	0.0130734	0.0105685	0.0111628	0.0121581
69.6	0.0128767	0.0104093	0.0112716	0.0121225
69.84	0.0129255	0.0108164	0.0114492	0.0121592
70.08	0.013234	0.0107176	0.0111365	0.0120076
70.32	0.0127408	0.0108822	0.0114335	0.0122869
70.56	0.0128051	0.0106646	0.0114824	0.0121691
70.8	0.0130254	0.0109964	0.0114917	0.0120017
71.04	0.0128798	0.0106455	0.0117808	0.0121033
71.28	0.0129117	0.0104858	0.0114227	0.0125756
71.52	0.0129085	0.0106788	0.011452	0.012177
71.76	0.0130538	0.0111272	0.0112737	0.0118627
72	0.013105	0.0108569	0.0109099	0.0123512
72.24	0.0129107	0.0110481	0.0119397	0.0124062
72.48	0.0128736	0.0110961	0.0112485	0.0125254
72.72	0.0132386	0.0108744	0.0119978	0.0124574
72.96	0.0132062	0.0112943	0.0118362	0.0125093
73.2	0.0126985	0.0109024	0.0121406	0.0125428
73.44	0.0135038	0.0108586	0.0114518	0.012208
73.68	0.0129819	0.0108581	0.0117708	0.0124049
73.92	0.0131951	0.0113322	0.0117431	0.0124757
74.16	0.0130027	0.0106601	0.0118899	0.0121984
74.4	0.0133509	0.0111663	0.0121463	0.0121962
74.64	0.0129359	0.0110539	0.011221	0.0122713
74.88	0.0132416	0.0109733	0.0113379	0.0125907
75.12	0.0130642	0.0112579	0.0109491	0.0125807
75.36	0.0132251	0.0112917	0.011438	0.0126426
75.6	0.0134015	0.0108676	0.0118988	0.0124658
75.84	0.013276	0.011065	0.0113243	0.0126626
76.08	0.0131002	0.0109771	0.0117509	0.0124726
76.32	0.0134166	0.0108528	0.0117566	0.012367
76.56	0.013312	0.0109319	0.0117137	0.0128191
76.8	0.0132088	0.0108973	0.0118007	0.0124732
77.04	0.0133474	0.0108197	0.0121214	0.0126755
77.28	0.013312	0.0112867	0.0111992	0.0124524
77.52	0.0130687	0.0111221	0.0115693	0.0123675
77.76	0.0131667	0.0105583	0.011774	0.0126328
78	0.0132345	0.0109383	0.0117615	0.0128278
78.24	0.0130022	0.0110912	0.0122504	0.0126516
78.48	0.0132748	0.0114369	0.0120407	0.0126351
78.72	0.0130691	0.0112415	0.0116534	0.0124552
78.96	0.0132922	0.0108115	0.0116165	0.0128881
79.2	0.0132198	0.0113204	0.0119916	0.0126209
79.44	0.013533	0.011204	0.0117124	0.0125059
79.68	0.0131758	0.0109385	0.0123153	0.012612
79.92	0.0132139	0.0107933	0.0116978	0.0129497
80.16	0.0136451	0.0113989	0.0120605	0.0126271
80.4	0.0135024	0.0108613	0.0119114	0.012783
80.64	0.0131107	0.0115226	0.0124471	0.0128132
80.88	0.0132282	0.0117114	0.0117814	0.0127547
81.12	0.0135865	0.010944	0.011801	0.0127566
81.36	0.0134743	0.0117752	0.0119328	0.0128039
81.6	0.0132072	0.0112372	0.012242	0.01274
81.84	0.0131021	0.0113846	0.0120941	0.0129643
82.08	0.0135943	0.0112378	0.0121379	0.0127025
82.32	0.0133159	0.0110584	0.0115224	0.0127593
82.56	0.0135637	0.011587	0.0124534	0.0128048
82.8	0.0134172	0.0114123	0.0122832	0.0126609
83.04	0.0134599	0.0113895	0.0118088	0.013035
83.28	0.0133464	0.0114555	0.0115556	0.0128308
83.52	0.0138912	0.0114343	0.0121804	0.0129659
83.76	0.0136524	0.0111441	0.0122379	0.0128963
84	0.0133816	0.011094	0.0124331	0.0128296
84.24	0.0135701	0.0117338	0.0121596	0.0128264
84.48	0.0132154	0.0110883	0.0121761	0.012946
84.72	0.0134504	0.0116317	0.0119148	0.0129877
84.96	0.0137993	0.0114995	0.012351	0.0127845
85.2	0.0133446	0.0115328	0.0122652	0.0129573
85.44	0.0134458	0.0112136	0.0118739	0.0128266
85.68	0.0138086	0.0110495	0.0129897	0.0131225
85.92	0.0133712	0.0113482	0.0124557	0.0130552
86.16	0.0134825	0.0110326	0.0120494	0.0128778
86.4	0.0137661	0.0115236	0.0122255	0.0128956
86.64	0.0134203	0.0114904	0.0125483	0.013027
86.88	0.0137135	0.0112289	0.0125126	0.0126091
87.12	0.0133571	0.0112971	0.0120871	0.0130881
87.36	0.0136618	0.0112542	0.0122089	0.0132294
87.6	0.0136322	0.0114297	0.0121445	0.0130861
87.84	0.0135982	0.0115131	0.0122092	0.0130685
88.08	0.0136267	0.01153	0.012627	0.0129959
88.32	0.0137387	0.0113742	0.0124485	0.012909
88.56	0.0132599	0.011191	0.0124636	0.0130105
88.8	0.0137101	0.0110843	0.0126139	0.0129911
89.04	0.0134048	0.011507	0.0125089	0.0128614
89.28	0.0137423	0.011705	0.012154	0.0130365
89.52	0.0138394	0.0112907	0.0120964	0.013118
89.76	0.0136646	0.011548	0.0123615	0.0134132
90	0.0134492	0.0117512	0.0125093	0.0131338
90.24	0.0136561	0.0113032	0.0128402	0.0131057
90.48	0.0133238	0.0112864	0.0128215	0.0130941
90.72	0.0138628	0.0113438	0.0127098	0.0130226
90.96	0.0137993	0.0114831	0.0124209	0.0131585
91.2	0.0137116	0.0117074	0.0126059	0.0132065
91.44	0.0136837	0.0113585	0.0129137	0.0134268
91.68	0.0135239	0.0113198	0.0126792	0.0130892
91.92	0.0135888	0.0115505	0.0124721	0.0134331
92.16	0.0136195	0.0117402	0.0122581	0.0132049
92.4	0.0137511	0.0116403	0.0122203	0.0129351
92.64	0.0137265	0.011662	0.0122974	0.0134806
92.88	0.0138665	0.0116707	0.0130989	0.0133123
93.12	0.0139835	0.0110681	0.0124859	0.0132139
93.36	0.013706	0.011429	0.012579	0.0129832
93.6	0.0138182	0.0116942	0.012556	0.0132153
93.84	0.0136639	0.0115702	0.012658	0.0131742
94.08	0.0140539	0.0114906	0.0126105	0.0132618
94.32	0.0137886	0.011634	0.0121813	0.0131544
94.56	0.0141283	0.011243	0.0124169	0.0132441
94.8	0.0138522	0.0114857	0.0126334	0.0133186
95.04	0.0140826	0.0116176	0.0129643	0.01324
95.28	0.0136586	0.0113503	0.012118	0.0133071
95.52	0.014116	0.0116725	0.0128773	0.0132412
95.76	0.0137281	0.0114176	0.0132371	0.013652
96	0.0139368	0.0121789	0.0127996	0.0131715
96.24	0.0141989	0.0118517	0.0124463	0.0131497
96.48	0.0141342	0.0115496	0.0128866	0.0132167
96.72	0.0136647	0.0117439	0.0127656	0.013502
96.96	0.0137729	0.0119025	0.0122963	0.0130999
97.2	0.0138845	0.011539	0.0124993	0.0132309
97.44	0.0137443	0.0116757	0.0122656	0.0133907
97.68	0.0136957	0.0114461	0.0122916	0.0135766
97.92	0.0137709	0.0117728	0.0128678	0.0133119
98.16	0.0139814	0.0112598	0.0125035	0.0133912
98.4	0.0136516	0.0113576	0.012311	0.0132078
98.64	0.0138548	0.011593	0.0123763	0.0131602
98.88	0.0139894	0.011646	0.0125226	0.0136557
99.12	0.0140115	0.0115041	0.012343	0.0134905
99.36	0.0139149	0.0114098	0.0127463	0.0133573
99.6	0.0139002	0.0120292	0.0126856	0.0133174
99.84	0.0136309	0.0117006	0.012837	0.0133489
100.08	0.0138881	0.0119453	0.0131689	0.0134562
100.32	0.0139678	0.0123222	0.0129355	0.0134337
100.56	0.0140117	0.0115276	0.0132087	0.0135756
100.8	0.0141542	0.0116249	0.0132998	0.013256
101.04	0.0138184	0.0118318	0.0128751	0.0136971
101.28	0.0139164	0.0116309	0.0124358	0.0132724
101.52	0.013853	0.0116118	0.0132674	0.0133974
101.76	0.0137874	0.0120594	0.0131726	0.0135465
102	0.0139413	0.0117372	0.0129201	0.0134996
102.24	0.0132172	0.011829	0.0130076	0.0135438
102.48	0.0141695	0.0115679	0.0126673	0.0134525
102.72	0.0138516	0.0118905	0.0125345	0.0135646
102.96	0.013796	0.0120789	0.0125541	0.013362
103.2	0.0140193	0.0114948	0.0129885	0.0134427
103.44	0.0138129	0.011632	0.0132504	0.0133943
103.68	0.0142178	0.0116299	0.0125103	0.0135264
103.92	0.013845	0.0117374	0.0130359	0.0132689
104.16	0.0135357	0.0120693	0.0130566	0.013608
104.4	0.0135968	0.0118631	0.0125188	0.0138395
104.64	0.01386	0.0119705	0.0125276	0.0134381
104.88	0.0136826	0.0120863	0.0124833	0.0135339
105.12	0.0138334	0.011641	0.0132505	0.0135753
105.36	0.0139295	0.0118086	0.013317	0.0135697
105.6	0.0142176	0.0119027	0.0130927	0.0135455
105.84	0.0139232	0.0123613	0.0128209	0.013464
106.08	0.0139305	0.0118279	0.0134711	0.0136074
106.32	0.0138661	0.0122433	0.013315	0.0137199
106.56	0.014153	0.0117595	0.0129503	0.0134336
106.8	0.0140876	0.0113625	0.0136917	0.0136374
107.04	0.0143461	0.0122271	0.0131536	0.0137631
107.28	0.0140693	0.0121724	0.0125486	0.0137801
107.52	0.0139248	0.0124355	0.0124696	0.0136326
107.76	0.014335	0.0120787	0.0127177	0.013578
108	0.0141063	0.0117805	0.0129366	0.0134655
108.24	0.0141292	0.0119362	0.0134845	0.0136723
108.48	0.0139051	0.0115099	0.0132106	0.0135575
108.72	0.0139543	0.0118714	0.0131593	0.0136432
108.96	0.0137158	0.0119392	0.0130527	0.0135534
109.2	0.0141679	0.0119393	0.0134561	0.0139358
109.44	0.013842	0.0119921	0.0127595	0.0136385
109.68	0.0140586	0.0120635	0.0127178	0.0135264
109.92	0.0143463	0.0121995	0.0129328	0.0139151
110.16	0.0138556	0.0119718	0.0126043	0.0135449
110.4	0.0140922	0.011819	0.013494	0.0136646
110.64	0.0138438	0.0115592	0.0132011	0.0137099
110.88	0.0142352	0.0122225	0.0138658	0.0139699
111.12	0.0140225	0.0121177	0.0133685	0.013642
111.36	0.0142621	0.0119202	0.0129174	0.0137303
111.6	0.0142158	0.0123044	0.0130315	0.0134044
111.84	0.0139096	0.0119521	0.0131801	0.013661
112.08	0.0138425	0.0120465	0.012763	0.0137126
112.32	0.0139912	0.0119942	0.0132829	0.0138735
112.56	0.0141991	0.0117405	0.0134544	0.0138345
112.8	0.0140462	0.0118519	0.0131782	0.0139333
113.04	0.0141672	0.0117376	0.013384	0.0134397
113.28	0.0139148	0.011962	0.0135823	0.0134401
113.52	0.0142303	0.0117628	0.0134392	0.0138415
113.76	0.0144425	0.0123334	0.0134298	0.0136692
114	0.0144632	0.0121001	0.013964	0.0135654
114.24	0.0141263	0.0120279	0.0135233	0.0140185
114.48	0.0138734	0.012721	0.0139275	0.0139139
114.72	0.0139711	0.0115065	0.013384	0.0138677
114.96	0.0141088	0.0120527	0.013102	0.0135458
115.2	0.0142885	0.0118963	0.0131133	0.013826
115.44	0.0139005	0.0125438	0.013182	0.0140464
115.68	0.0138345	0.0121392	0.0134869	0.0139993
115.92	0.0143933	0.0123069	0.0135462	0.0138332
116.16	0.0141528	0.0120815	0.0129306	0.0137874
116.4	0.0143001	0.0119724	0.0130636	0.0138547
116.64	0.0141327	0.0125788	0.0131076	0.0137412
116.88	0.0144447	0.0120685	0.0132144	0.0140128
117.12	0.0142685	0.0119693	0.01314	0.0137868
117.36	0.0140264	0.0119073	0.013363	0.0138411
117.6	0.0139141	0.0119524	0.0129894	0.0141383
117.84	0.0140485	0.0121651	0.0134106	0.0137721
118.08	0.0140533	0.0118423	0.013224	0.0138504
118.32	0.014213	0.0115781	0.013672	0.0137881
118.56	0.0137385	0.0123973	0.013707	0.0139121
118.8	0.0141622	0.0123763	0.0136364	0.0138664
119.04	0.0141348	0.0123806	0.0136532	0.013819
119.28	0.0142447	0.0119128	0.0136784	0.0138585
119.52	0.0143096	0.0115898	0.0136323	0.013852
119.76	0.0142434	0.0120814	0.0131476	0.0140256
120	0.0141118	0.0120444	0.0134741	0.0140512
120.24	0.0141024	0.0124018	0.0136859	0.0139024
120.48	0.0145627	0.0120196	0.0133976	0.0138029
120.72	0.0143223	0.012066	0.013585	0.0139158
120.96	0.0144957	0.0122167	0.0131036	0.0137199
121.2	0.0143865	0.0121271	0.0137151	0.013891
121.44	0.0139865	0.0119153	0.0132965	0.0138887
121.68	0.0142128	0.0122364	0.0137491	0.0140872
121.92	0.0143903	0.0123031	0.0129966	0.0136012
122.16	0.0141772	0.0126398	0.0132755	0.0139814
122.4	0.0141807	0.0119346	0.0139098	0.0139614
122.64	0.0144014	0.0115181	0.0133176	0.013979
122.88	0.0142371	0.0125987	0.0138286	0.0139846
123.12	0.0138051	0.0125177	0.0137523	0.0139598
123.36	0.0137697	0.0122895	0.0139234	0.0139926
123.6	0.0142463	0.0120368	0.0132412	0.0139117
123.84	0.0144505	0.0123309	0.0137339	0.0140063
124.08	0.0145083	0.0124161	0.0137826	0.0139325
124.32	0.0140796	0.0121722	0.0137098	0.0141835
124.56	0.0138976	0.0121473	0.013457	0.0139348
124.8	0.0144778	0.0122458	0.0135668	0.0137632
125.04	0.014018	0.012293	0.0134477	0.0136329
125.28	0.0140377	0.0121256	0.0132221	0.0140753
125.52	0.0141662	0.0123941	0.0135091	0.014281
125.76	0.0142657	0.0126293	0.0133618	0.0141861
126	0.0136516	0.012409	0.0138908	0.0140681
126.24	0.0141375	0.0119185	0.0132929	0.01404
126.48	0.0138314	0.0119271	0.0141339	0.0142962
126.72	0.0142833	0.0121845	0.0140425	0.0139516
126.96	0.014429	0.012069	0.0133063	0.0138471
127.2	0.0144859	0.0122646	0.0137523	0.0141903
127.44	0.0142675	0.0126042	0.0135781	0.0141622
127.68	0.0141401	0.0120233	0.0135741	0.0140279
127.92	0.0140693	0.012038	0.0133941	0.0140359
128.16	0.0144482	0.0123244	0.0135342	0.0140102
128.4	0.0145296	0.012039	0.0140585	0.0138132
128.64	0.0139361	0.0124196	0.0132719	0.0142234
128.88	0.0140182	0.0120271	0.0139185	0.0140713
129.12	0.0144442	0.012212	0.0135057	0.0142266
129.36	0.0143786	0.0123246	0.0138553	0.0141791
129.6	0.0141096	0.0123053	0.0138314	0.0141212
129.84	0.0144557	0.0124081	0.0131685	0.0140987
130.08	0.0143604	0.0124067	0.0144436	0.0142042
130.32	0.0141805	0.0124935	0.0138431	0.0139562
130.56	0.0139838	0.0116129	0.013621	0.0142864
130.8	0.0143812	0.0128369	0.0137222	0.0139683
131.04	0.0141552	0.0120168	0.0140337	0.014077
131.28	0.0144209	0.0121499	0.013483	0.0140383
131.52	0.0141857	0.0121424	0.0135904	0.0138699
131.76	0.0142741	0.0123093	0.0135	0.0140472
132	0.0140816	0.0123586	0.0140939	0.0140979
132.24	0.0145167	0.011689	0.0144221	0.0140464
132.48	0.0145549	0.0119405	0.0134485	0.0139425
132.72	0.0143056	0.012598	0.0137589	0.0141189
132.96	0.0142253	0.0121719	0.0135212	0.0140133
133.2	0.0142116	0.0120314	0.0137847	0.0138577
133.44	0.0139665	0.012506	0.0137305	0.0139101
133.68	0.0140288	0.0120266	0.0138783	0.0143642
133.92	0.014498	0.0120271	0.0140564	0.0140464
134.16	0.0143298	0.0125988	0.0141539	0.0142401
134.4	0.0143218	0.0123269	0.0134314	0.0139164
134.64	0.0142895	0.012567	0.013566	0.0142184
134.88	0.0141483	0.0120573	0.0137503	0.0141327
135.12	0.0142812	0.0121283	0.0135595	0.0141481
135.36	0.0144622	0.0124618	0.0133853	0.013981
135.6	0.0140636	0.0119811	0.0140638	0.0139955
135.84	0.0141393	0.0127792	0.0135829	0.0140706
136.08	0.0140691	0.0118055	0.0137026	0.0143115
136.32	0.0144412	0.0127083	0.0140636	0.0140779
136.56	0.0144607	0.0123366	0.0140264	0.0139955
136.8	0.0140898	0.0123485	0.0135909	0.0138379
137.04	0.014163	0.0118022	0.0139878	0.0142122
137.28	0.0139226	0.0126906	0.0139921	0.0140254
137.52	0.0146007	0.0125544	0.0136411	0.0143269
137.76	0.0141884	0.012336	0.0137365	0.013993
138	0.0139448	0.0124438	0.0137712	0.0141523
138.24	0.0141527	0.0124477	0.013833	0.0141022
138.48	0.0146573	0.0124451	0.0136643	0.0142033
138.72	0.0150883	0.0123396	0.0138718	0.0141289
138.96	0.014194	0.0128088	0.0140881	0.0141192
139.2	0.0143613	0.0123604	0.014012	0.0139154
139.44	0.0137666	0.0124878	0.0136048	0.0143475
139.68	0.0142105	0.0126208	0.0137563	0.0142617
139.92	0.0142548	0.0126563	0.0143256	0.0140707
140.16	0.0141057	0.0123257	0.014264	0.0141468
140.4	0.0145543	0.0122468	0.0138651	0.014231
140.64	0.013919	0.0125396	0.0142498	0.0140488
140.88	0.0143148	0.0123383	0.0140497	0.0141007
141.12	0.0142027	0.0122972	0.0144902	0.014171
141.36	0.0146179	0.0130056	0.0140602	0.0142634
141.6	0.0141195	0.0130294	0.0138291	0.0142125
141.84	0.0143908	0.012406	0.0142468	0.0142109
142.08	0.0144754	0.01264	0.0140283	0.0141679
142.32	0.0142771	0.0124154	0.0140273	0.0142062
142.56	0.0141592	0.0121688	0.014177	0.014538
142.8	0.0141601	0.0128872	0.0141937	0.0142467
143.04	0.0143734	0.0127865	0.0140553	0.0144778
143.28	0.0143295	0.012957	0.0140217	0.0142183
143.52	0.0145628	0.0122297	0.0139388	0.0142192
143.76	0.0141174	0.0122343	0.0136554	0.0142079
144	0.0144237	0.0123234	0.0143955	0.0144034
144.24	0.0143904	0.0123457	0.0142293	0.0140026
144.48	0.0140975	0.0120998	0.0141717	0.0143013
144.72	0.0142807	0.0121202	0.0143661	0.0142891
144.96	0.0145512	0.0123011	0.014452	0.0142154
145.2	0.0146763	0.0125583	0.0140008	0.0141551
145.44	0.0141865	0.0127613	0.0141871	0.0142511
145.68	0.0139234	0.0123828	0.0146619	0.0142105
145.92	0.0140983	0.0121215	0.0140733	0.0142828
146.16	0.0143861	0.0124411	0.014252	0.014292
146.4	0.0144449	0.0122583	0.0142631	0.0142269
146.64	0.0144653	0.0123696	0.0145063	0.0139375
146.88	0.0146118	0.0126917	0.0138026	0.0143773
147.12	0.0142761	0.0131143	0.0142402	0.0144415
147.36	0.0145005	0.0123703	0.0140741	0.014292
147.6	0.0142787	0.0126635	0.0137777	0.0146951
147.84	0.0145578	0.0126767	0.0141352	0.014236
148.08	0.0142758	0.0124914	0.0142872	0.014057
148.32	0.014313	0.0124847	0.0137464	0.0142947
148.56	0.0142326	0.0129142	0.0139131	0.0145264
148.8	0.0138601	0.0126646	0.0141944	0.0142214
149.04	0.0141754	0.0122729	0.0134517	0.0142581
149.28	0.0140862	0.0126468	0.0149748	0.0143857
149.52	0.0151387	0.0122701	0.0144773	0.0143093
149.76	0.0143282	0.0123328	0.0143508	0.0141457
150	0.0143671	0.0122992	0.0146979	0.0145372
150.24	0.0147144	0.0131189	0.0152056	0.0149123
150.48	0.015273	0.0134215	0.0166762	0.0153107
150.72	0.00215642	0.00273588	0.00332942	0.00371766
150.96	0.0218684	0.0369589	0.0299604	0.0309278
151.2	-0.0610297	-0.0495541	-0.0569418	-0.0546486
151.44	0.202468	0.176609	0.196431	0.189228
151.68	0.03618	0.031241	0.0376177	0.0355132
151.92	0.0175666	0.016632	0.0202462	0.0181067
152.16	0.0176373	0.0164848	0.0199471	0.0180009
152.4	0.0177138	0.0170356	0.0204542	0.0182141
152.64	0.0181192	0.0169705	0.0205813	0.0185701
152.88	0.0186448	0.0166266	0.0205289	0.0188377
153.12	0.0186591	0.0172935	0.021439	0.0191802
153.36	0.0185152	0.01752	0.021439	0.0192468
153.6	0.0189734	0.0174154	0.0213927	0.0197336
153.84	0.0189707	0.0176192	0.0217751	0.0196284
154.08	0.0194256	0.0175286	0.0225053	0.0204587
154.32	0.0193229	0.0180078	0.0224458	0.0199674
154.56	0.0195968	0.017991	0.0226791	0.0203055
154.8	0.0196582	0.0183034	0.0235732	0.019922
155.04	0.0194324	0.0184447	0.0233581	0.0205367
155.28	0.0198893	0.0186564	0.0230148	0.0204096
155.52	0.0199993	0.0184189	0.0230238	0.0208144
155.76	0.0197938	0.0186821	0.0232415	0.0206894
156	0.0204202	0.0187237	0.0236352	0.020931
156.24	0.0205182	0.0186908	0.0232517	0.0210475
156.48	0.0208673	0.0191251	0.0237569	0.0211187
156.72	0.0206184	0.0193268	0.0241288	0.0213035
156.96	0.0206487	0.0192626	0.0238747	0.0213112
157.2	0.0203516	0.0191464	0.0237777	0.0215557
157.44	0.0208738	0.0190247	0.0241029	0.0218107
157.68	0.0208385	0.0195312	0.0244455	0.0219323
157.92	0.0213692	0.0196378	0.0243318	0.0218678
158.16	0.0211578	0.0193221	0.0245193	0.0221574
158.4	0.0211073	0.0199215	0.0247555	0.0221054
158.64	0.0217157	0.019411	0.0246175	0.0221163
158.88	0.0212261	0.0196925	0.0251728	0.0219509
159.12	0.0213377	0.0194014	0.02493	0.0222621
159.36	0.0211479	0.0195466	0.0247885	0.0226205
159.6	0.0215214	0.0200831	0.025214	0.0222594
159.84	0.0219177	0.0200392	0.0245199	0.0225449
160.08	0.0219082	0.0199919	0.025618	0.0225472
160.32	0.0215348	0.0200251	0.0248965	0.0225641
160.56	0.0218642	0.0201796	0.0248138	0.0225179
160.8	0.0215819	0.0200062	0.0254901	0.022658
161.04	0.021635	0.0200564	0.0255119	0.0226651
161.28	0.0220421	0.0201213	0.0256986	0.0230941
161.52	0.0220154	0.0202906	0.0253549	0.02264
161.76	0.0222409	0.0201229	0.0252463	0.0228914
162	0.0218663	0.020465	0.02586	0.0229884
162.24	0.0222454	0.0198276	0.02562	0.0227619
162.48	0.0217851	0.0203225	0.0249281	0.0232573
162.72	0.0220513	0.0206231	0.0255373	0.0234178
162.96	0.0222048	0.0205034	0.0249278	0.0235665
163.2	0.0228307	0.0207508	0.0258299	0.0232008
163.44	0.0222251	0.0211635	0.0260881	0.0234146
163.68	0.0222841	0.0202169	0.025926	0.0234935
163.92	0.0221403	0.0202179	0.0261542	0.0235279
164.16	0.0226006	0.0207372	0.026006	0.0234797
164.4	0.0227112	0.0207675	0.0263466	0.0237121
164.64	0.0221999	0.0206026	0.0262227	0.0237463
164.88	0.0223381	0.020628	0.0253421	0.0237814
165.12	0.0228251	0.020775	0.0263346	0.0235379
165.36	0.0224242	0.0206317	0.0270209	0.0238707
165.6	0.0227251	0.0205483	0.0261924	0.024103
165.84	0.0226306	0.0207043	0.0263546	0.0240435
166.08	0.0226655	0.0205669	0.0264017	0.0241496
166.32	0.0225011	0.0210684	0.0266594	0.023688
166.56	0.0229884	0.0211501	0.0265083	0.0238232
166.8	0.0225629	0.0210574	0.0263768	0.0238829
167.04	0.0225387	0.020909	0.0264541	0.0243911
167.28	0.0226806	0.0208797	0.0265713	0.0238591
167.52	0.0228043	0.0205991	0.0263709	0.0241086
167.76	0.0229272	0.0208784	0.026858	0.0241641
168	0.0228466	0.0209518	0.0264562	0.0242887
168.24	0.0226354	0.0209899	0.0267505	0.0242702
168.48	0.0233032	0.0210426	0.026717	0.0242176
168.72	0.0228446	0.0207613	0.0264995	0.0243955
168.96	0.0231613	0.0205525	0.0267273	0.0244517
169.2	0.0230122	0.021411	0.0266489	0.0243504
169.44	0.0232248	0.0214034	0.0275054	0.0245091
169.68	0.0230698	0.0208214	0.0267169	0.0243649
169.92	0.0229061	0.0213807	0.0268455	0.0244994
170.16	0.023134	0.0213504	0.0269275	0.024667
170.4	0.0229649	0.0208979	0.0267761	0.0247844
170.64	0.0231507	0.0209313	0.0266767	0.0245681
170.88	0.0232009	0.0209	0.0268102	0.024922
171.12	0.0230689	0.0212457	0.0270256	0.0247387
171.36	0.0232764	0.0220757	0.0268435	0.0246501
171.6	0.0231572	0.0214796	0.0264262	0.0246544
171.84	0.0232455	0.0213488	0.0266459	0.0249236
172.08	0.0235259	0.0212008	0.0272456	0.0247253
172.32	0.0231386	0.0214705	0.0271661	0.0250164
172.56	0.0235544	0.0212931	0.0269827	0.0246735
172.8	0.0231814	0.0209332	0.0268124	0.0243826
173.04	0.0231632	0.0212509	0.0272111	0.0248417
173.28	0.023522	0.0214655	0.0265608	0.0249731
173.52	0.0234829	0.0214101	0.0272356	0.0248417
173.76	0.0233805	0.0214461	0.0268121	0.0248499
174	0.0230962	0.0212819	0.0270512	0.0250581
174.24	0.0236996	0.0219911	0.027391	0.0247394
174.48	0.0234398	0.0215717	0.0272378	0.0251272
174.72	0.0236108	0.0215707	0.0273644	0.0247879
174.96	0.0232142	0.0218673	0.0273904	0.0252888
175.2	0.0235457	0.0213726	0.0270693	0.0250294
175.44	0.0236815	0.021694	0.0277356	0.0249826
175.68	0.0236059	0.020778	0.0267967	0.0252129
175.92	0.0234855	0.0214209	0.0272785	0.0254456
176.16	0.0235037	0.0216747	0.0269102	0.0251863
176.4	0.0235229	0.0216444	0.0269407	0.0251318
176.64	0.0236433	0.0214972	0.0271379	0.0249953
176.88	0.0235391	0.0213129	0.0276473	0.0249917
177.12	0.0238366	0.0219234	0.0277427	0.025103
177.36	0.0236079	0.0211962	0.0271489	0.0254106
177.6	0.0238626	0.0213616	0.0272901	0.0255172
177.84	0.0237284	0.0211173	0.027683	0.02561
178.08	0.0235629	0.0215394	0.02741	0.0252378
178.32	0.0237935	0.0216824	0.0274247	0.025301
178.56	0.0237256	0.0216073	0.0274057	0.0256458
178.8	0.0237859	0.0216994	0.0276135	0.0253863
179.04	0.0236911	0.0217529	0.0274227	0.0253415
179.28	0.0237007	0.0220443	0.0272686	0.0257054
179.52	0.0240936	0.0217508	0.0275	0.0252586
179.76	0.0239479	0.0221694	0.0277156	0.0255315
180	0.0240282	0.0212243	0.0277683	0.0255819
180.24	0.0237611	0.0216575	0.0272239	0.0252951
180.48	0.0237267	0.0216912	0.0271642	0.0256355
180.72	0.0237257	0.0221557	0.0269473	0.0255361
180.96	0.0238542	0.0214471	0.0276287	0.0254986
181.2	0.0240478	0.0218893	0.0272753	0.0257759
181.44	0.0238696	0.0216558	0.0273101	0.025774
181.68	0.0237238	0.0215713	0.0276755	0.0256387
181.92	0.0242879	0.0220892	0.0280144	0.0253959
182.16	0.0240345	0.0218739	0.0276249	0.0257573
182.4	0.0239491	0.0213166	0.0281832	0.0256979
182.64	0.0241721	0.0214282	0.0271154	0.025898
182.88	0.024223	0.0221368	0.0274473	0.0256213
183.12	0.0239225	0.0216674	0.027288	0.0258262
183.36	0.0239753	0.0217961	0.0278243	0.0256279
183.6	0.0241686	0.0218182	0.027707	0.025819
183.84	0.0240962	0.0217182	0.0278543	0.0257333
184.08	0.0242026	0.0216309	0.0276547	0.0257456
184.32	0.0241331	0.0216197	0.0278505	0.0259305
184.56	0.0241176	0.0220242	0.0273742	0.0261026
184.8	0.0241323	0.0214845	0.0278438	0.02595
185.04	0.0246265	0.0215689	0.0275328	0.0262454
185.28	0.0239582	0.0219913	0.0275971	0.0261456
185.52	0.0241911	0.0216679	0.0274012	0.0257613
185.76	0.0243498	0.021939	0.0274528	0.0258535
186	0.0242442	0.0217204	0.0278437	0.0258486
186.24	0.0241361	0.0220086	0.0286582	0.0261657
186.48	0.0241576	0.0225935	0.0279726	0.0264074
186.72	0.0246711	0.0219061	0.0279355	0.0258252
186.96	0.0244513	0.0214981	0.0275695	0.0260451
187.2	0.0241753	0.0218282	0.0277416	0.0260421
187.44	0.0238298	0.0216352	0.0277311	0.0263669
187.68	0.024531	0.0215832	0.0276389	0.0259243
187.92	0.0244748	0.0218377	0.0277486	0.0258805
188.16	0.0239522	0.0218789	0.0273	0.0260961
188.4	0.0240907	0.022278	0.0273451	0.0260001
188.64	0.0241963	0.021618	0.0278958	0.0261629
188.88	0.0242273	0.0224314	0.0276329	0.0264698
189.12	0.0245395	0.0223433	0.0274455	0.0260193
189.36	0.0242706	0.0218672	0.0271626	0.0260575
189.6	0.0243986	0.022265	0.027425	0.0261749
189.84	0.0242458	0.0223051	0.0281068	0.026298
190.08	0.0242693	0.0220367	0.027995	0.0258004
190.32	0.024668	0.0227349	0.0273763	0.025955
190.56	0.0241212	0.0221327	0.0275179	0.0260825
190.8	0.0248361	0.0223813	0.0281234	0.0260344
191.04	0.0243692	0.0221779	0.0276306	0.0261034
191.28	0.0246729	0.0217659	0.027862	0.0258393
191.52	0.0245697	0.0219596	0.0276988	0.0263552
191.76	0.0251237	0.0217049	0.0277874	0.0264702
192	0.0248877	0.0219683	0.0275985	0.0264764
192.24	0.0243452	0.0217681	0.0279958	0.0264127
192.48	0.0246703	0.0224427	0.027863	0.0262103
192.72	0.0244216	0.022383	0.0272352	0.0262687
192.96	0.024205	0.022482	0.02796	0.0262304
193.2	0.0244319	0.0220264	0.0277964	0.0263875
193.44	0.0248906	0.0216793	0.0274128	0.0264178
193.68	0.0246825	0.0221049	0.0275219	0.0264934
193.92	0.0247547	0.022348	0.027654	0.0262864
194.16	0.0245584	0.0218264	0.0276942	0.0265008
194.4	0.0243479	0.022092	0.0280715	0.0262717
194.64	0.024244	0.0221672	0.0276983	0.0264337
194.88	0.024252	0.021926	0.0285806	0.0263882
195.12	0.0245764	0.0217964	0.0276529	0.0266129
195.36	0.0246884	0.0215434	0.0280454	0.0263243
195.6	0.0242693	0.0220789	0.0280812	0.0265045
195.84	0.0243843	0.0222647	0.0283663	0.0262764
196.08	0.0246231	0.0222488	0.0276503	0.0262362
196.32	0.0245184	0.0217465	0.0284865	0.0263965
196.56	0.0243865	0.0225083	0.0278389	0.0263796
196.8	0.0247543	0.0221134	0.0275499	0.0264448
197.04	0.0248737	0.0223417	0.0274894	0.026399
197.28	0.0242651	0.0218996	0.0282807	0.0266552
197.52	0.0248045	0.0223851	0.0279712	0.0265779
197.76	0.0248477	0.022001	0.0276445	0.0261827
198	0.0243241	0.0222103	0.0277341	0.026269
198.24	0.0246064	0.0223762	0.028038	0.0263458
198.48	0.0248515	0.0225044	0.0279293	0.026677
198.72	0.0249466	0.0224972	0.0283556	0.0263316
198.96	0.0244304	0.0223007	0.0275674	0.0264121
199.2	0.024669	0.0223274	0.0287589	0.0260219
199.44	0.0248364	0.0221485	0.0278809	0.0262011
199.68	0.0247724	0.0227044	0.028136	0.026218
199.92	0.0253092	0.0215642	0.0279646	0.0265474
200.16	0.02503	0.0223668	0.0278059	0.0265409
200.4	0.0247758	0.0222344	0.0273561	0.0264983
200.64	0.0250365	0.0221383	0.0279636	0.0264226
200.88	0.0249692	0.0220528	0.0284498	0.0264088
201.12	0.0251934	0.0226664	0.0281216	0.0265884
201.36	0.0246887	0.0219045	0.0279698	0.0263632
201.6	0.0253611	0.0219494	0.0286061	0.0269254
201.84	0.0249578	0.0218851	0.0281197	0.0268717
202.08	0.024898	0.0222075	0.0279948	0.0265736
202.32	0.0248058	0.0220199	0.0280287	0.0264538
202.56	0.0249985	0.0222155	0.0277094	0.0263514
202.8	0.0246478	0.0223994	0.0278534	0.0266911
203.04	0.0247995	0.0222618	0.0277812	0.0265145
203.28	0.0247875	0.0223502	0.0276803	0.0265771
203.52	0.0254945	0.02202	0.0277932	0.0267442
203.76	0.024726	0.0216926	0.0281637	0.0266358
204	0.0252472	0.0220272	0.0273313	0.0262649
204.24	0.0247922	0.0227308	0.0281801	0.0266649
204.48	0.0252276	0.0221293	0.028358	0.0261354
204.72	0.0250233	0.0218223	0.028054	0.0263958
204.96	0.0251968	0.0221551	0.0274941	0.0264392
205.2	0.0248338	0.0222758	0.0273331	0.0262793
205.44	0.025113	0.022568	0.0285304	0.026418
205.68	0.0250291	0.022448	0.0275315	0.0265348
205.92	0.0251565	0.021652	0.0278209	0.0265357
206.16	0.0249101	0.0226359	0.0280999	0.0265267
206.4	0.0250383	0.0226504	0.0279827	0.0262567
206.64	0.0247548	0.0222691	0.0277311	0.0264573
206.88	0.0244394	0.0223816	0.0280027	0.0267516
207.12	0.0249752	0.0219652	0.0279058	0.0262356
207.36	0.0248897	0.022499	0.0271991	0.0266791
207.6	0.0251711	0.0218861	0.0276892	0.0265446
207.84	0.0250589	0.022379	0.0279336	0.0264242
208.08	0.0246562	0.0222446	0.0283252	0.0265975
208.32	0.0248486	0.022308	0.0272313	0.0266004
208.56	0.0250184	0.0228009	0.027745	0.0264213
208.8	0.0248692	0.0222468	0.0274484	0.0264541
209.04	0.0250917	0.0227675	0.0277936	0.0263451
209.28	0.0251636	0.0220327	0.0280623	0.0266718
209.52	0.0247349	0.0221648	0.0283632	0.0264794
209.76	0.0250659	0.0222125	0.028083	0.0263422
210	0.0253162	0.0218694	0.027969	0.0263348
210.24	0.0249424	0.022468	0.027597	0.0265129
210.48	0.0249637	0.0218822	0.0277964	0.0265211
210.72	0.0248926	0.0216384	0.0274061	0.0266063
210.96	0.0248668	0.0220101	0.0276909	0.0264068
211.2	0.0250963	0.0226875	0.0276797	0.0264471
211.44	0.0254727	0.0221079	0.0284306	0.026488
211.68	0.0252955	0.0221173	0.0278234	0.0266781
211.92	0.0248536	0.0223784	0.0276557	0.0266513
212.16	0.024811	0.0218701	0.0277532	0.026104
212.4	0.0249537	0.0219334	0.027361	0.0265593
212.64	0.0251785	0.0222455	0.0275914	0.0267684
212.88	0.024797	0.0221589	0.0279933	0.0266894
213.12	0.0251322	0.0222701	0.0280096	0.0265881
213.36	0.0247654	0.0221262	0.0276879	0.0266519
213.6	0.0250818	0.021888	0.0276876	0.0265643
213.84	0.0253234	0.0220129	0.0276308	0.0269412
214.08	0.0251005	0.0222365	0.0277968	0.0264047
214.32	0.0248579	0.02239	0.0279669	0.0263105
214.56	0.0252997	0.0222237	0.0273483	0.0262936
214.8	0.0251706	0.0225196	0.0278249	0.0265819
215.04	0.0253704	0.0222215	0.0276699	0.0268472
215.28	0.0251672	0.0220291	0.0275007	0.0267134
215.52	0.0251183	0.0220243	0.0274903	0.0266669
215.76	0.025222	0.0220708	0.027823	0.0267645
216	0.0256068	0.0225335	0.0273644	0.0267662
216.24	0.0255136	0.0223127	0.0276581	0.0265474
216.48	0.025534	0.0221246	0.02762	0.0266708
216.72	0.0253588	0.0229133	0.0279416	0.0266696
216.96	0.0250224	0.0220253	0.0279146	0.0266077
217.2	0.0256239	0.0221594	0.0278374	0.0265871
217.44	0.0250288	0.0216555	0.0274889	0.0267843
217.68	0.0254106	0.0221775	0.0276563	0.0265743
217.92	0.0252874	0.0221216	0.0276664	0.0268429
218.16	0.0256405	0.0223199	0.0275653	0.0265033
218.4	0.0249957	0.0218944	0.0276679	0.0268586
218.64	0.025242	0.0223748	0.0274643	0.0266618
218.88	0.025483	0.0223275	0.0274164	0.0264174
219.12	0.0251746	0.0224966	0.0278588	0.026741
219.36	0.0254781	0.0219575	0.0277924	0.026843
219.6	0.0250426	0.0219876	0.0283593	0.026416
219.84	0.0254626	0.0219824	0.0274183	0.0268208
220.08	0.0249532	0.0220767	0.0274762	0.0265944
220.32	0.024837	0.0224678	0.027625	0.0266149
220.56	0.0249731	0.0221632	0.027474	0.0266985
220.8	0.0252157	0.0220191	0.0277863	0.0267776
221.04	0.0251578	0.0221647	0.0278228	0.0263048
221.28	0.0253804	0.0222036	0.0278771	0.0263098
221.52	0.0251645	0.0222471	0.0277785	0.0267062
221.76	0.0257548	0.0219477	0.0275442	0.0265011
222	0.0251526	0.022243	0.0273112	0.0264744
222.24	0.0254281	0.0218915	0.0276776	0.0264204
222.48	0.02509	0.0221393	0.0272883	0.0263853
222.72	0.0253515	0.0223154	0.0275142	0.0266338
222.96	0.0250888	0.0223633	0.0274855	0.0264162
223.2	0.0254045	0.0221938	0.027622	0.0267583
223.44	0.0255377	0.0222614	0.0279497	0.0262364
223.68	0.0253	0.022493	0.0277499	0.0266167
223.92	0.0253303	0.0217866	0.0276424	0.0266305
224.16	0.0251394	0.0221619	0.0276139	0.0262022
224.4	0.0254119	0.0222523	0.0275171	0.0269207
224.64	0.0256065	0.0220116	0.0275814	0.0263493
224.88	0.0251919	0.0219612	0.0281167	0.0267508
225.12	0.0252475	0.0222778	0.0278196	0.0264773
225.36	0.0252498	0.0223829	0.0277759	0.0264337
225.6	0.0247775	0.0222141	0.027652	0.0266196
225.84	0.0253733	0.0220126	0.0279917	0.0264766
226.08	0.0249994	0.0221987	0.0273688	0.0263533
226.32	0.0253726	0.0224366	0.0277511	0.0267109
226.56	0.0250237	0.0218866	0.0275494	0.0262631
226.8	0.0250876	0.0218299	0.0282218	0.0264976
227.04	0.0254264	0.0226631	0.027684	0.0266858
227.28	0.0253125	0.0221472	0.027335	0.0260881
227.52	0.0251592	0.0217787	0.0277401	0.026305
227.76	0.0256295	0.0217097	0.0279879	0.0265
228	0.0256839	0.0217906	0.0274234	0.0263543
228.24	0.0253294	0.0220081	0.0271297	0.0264634
228.48	0.0255935	0.0217783	0.0278175	0.0261943
228.72	0.0256372	0.0222585	0.02819	0.0266477
228.96	0.0254002	0.0220606	0.0277318	0.0266022
229.2	0.0248158	0.0220671	0.0276496	0.026416
229.44	0.025084	0.02202	0.0278115	0.0260442
229.68	0.0252216	0.021988	0.0274531	0.0267751
229.92	0.0255127	0.0218937	0.0274858	0.0264091
230.16	0.0253261	0.0222287	0.0278265	0.0266884
230.4	0.0255867	0.0220229	0.0279463	0.0263732
230.64	0.025455	0.0223335	0.0274685	0.0269318
230.88	0.0256264	0.0216372	0.0276295	0.0261707
231.12	0.0251897	0.0222627	0.0282085	0.0263089
231.36	0.0253952	0.0220439	0.027516	0.0266632
231.6	0.0254196	0.0225329	0.0282618	0.0266117
231.84	0.0256984	0.0222099	0.0272928	0.026432
232.08	0.0252854	0.0223231	0.0279398	0.0263383
232.32	0.0253768	0.0222791	0.0280681	0.02609
232.56	0.0252053	0.0218554	0.0279832	0.0262209
232.8	0.0250908	0.0223663	0.0280596	0.0264798
233.04	0.0255755	0.0220593	0.0272699	0.0265932
233.28	0.0253918	0.0221217	0.0270725	0.026683
233.52	0.0256384	0.0218751	0.0273678	0.0265919
233.76	0.0253878	0.0217948	0.0272237	0.0264914
234	0.0252072	0.0223142	0.0277363	0.0263856
234.24	0.025485	0.0224263	0.0271934	0.0261634
234.48	0.0254645	0.0224134	0.0272908	0.0264489
234.72	0.0254387	0.0223289	0.0279408	0.0262131
234.96	0.0248113	0.0222055	0.0280199	0.026044
235.2	0.0253052	0.0213332	0.0276501	0.0260191
235.44	0.0256687	0.021964	0.0272732	0.0262394
235.68	0.0254993	0.0224163	0.0280939	0.0264783
235.92	0.025454	0.0218354	0.0274663	0.0262321
236.16	0.0254901	0.0221038	0.0270427	0.0262472
236.4	0.0255071	0.0219511	0.0274719	0.0262357
236.64	0.0255965	0.0223389	0.0278079	0.0260597
236.88	0.0254423	0.0221822	0.0274834	0.0266498
237.12	0.0253885	0.0220153	0.0272815	0.0264611
237.36	0.0253341	0.0221347	0.0272555	0.0264932
237.6	0.0253317	0.021832	0.0278124	0.0263098
237.84	0.0251629	0.02199	0.0271393	0.0262326
238.08	0.0253968	0.0222191	0.0277492	0.0265079
238.32	0.025182	0.0215934	0.0278893	0.0266242
238.56	0.0252002	0.0220182	0.0271623	0.0261309
238.8	0.025076	0.0219568	0.0272632	0.026486
239.04	0.0254077	0.0219489	0.0272139	0.0264339
239.28	0.0253814	0.0218935	0.0269852	0.0260759
239.52	0.0254842	0.0220386	0.0273086	0.0261267
239.76	0.0253423	0.0220376	0.0282421	0.0264651

## Sheet: GIV CT
Time	Exp1	Exp2	Exp3
0	-0.00015807	0.000138205	0.000100886
0.24	2.69343e-05	5.27941e-05	-0.000131073
0.48	-0.000194934	-0.000334772	0.000311992
0.72	0.000119069	0.000189902	0.000638792
0.96	1.1515e-05	-0.000250767	0.000155537
1.2	-0.000223276	0.000257989	5.58519e-05
1.44	0.000497791	0.000299255	0.000126896
1.68	0.000155961	0.000500002	6.06713e-05
1.92	0.000162812	0.000500144	0.00040702
2.16	7.85762e-05	0.000403307	0.000108969
2.4	0.000258674	0.000171576	0.000139414
2.64	-7.15524e-05	-0.000184071	0.000221589
2.88	0.000338286	-0.000106866	6.19502e-05
3.12	0.000118065	0.000129435	0.000231664
3.36	-1.49123e-05	-2.91416e-06	0.000358804
3.6	-5.82312e-05	0.000471243	-1.84964e-05
3.84	-7.40864e-05	2.13412e-05	0.000149868
4.08	0.000400709	0.000166505	0.000149151
4.32	0.000506178	0.000149676	0.000123143
4.56	0.000263929	0.000439384	-0.000107208
4.8	0.00050702	-0.000321776	-0.000139709
5.04	-0.000236729	0.000320479	0.00024512
5.28	0.000421405	7.19419e-05	0.000248841
5.52	0.000219727	0.000420681	0.000163724
5.76	3.40488e-05	-4.78542e-05	0.000274493
6	-0.000118441	0.000260712	9.82182e-05
6.24	-0.000226833	7.07491e-05	-0.000116022
6.48	0.000203736	0.000100543	6.04313e-05
6.72	9.57808e-05	-0.000111823	0.000266388
6.96	0.000187313	8.10037e-06	0.00012308
7.2	0.000182721	5.06705e-05	0.000219383
7.44	-0.000237233	0.000491898	7.2497e-05
7.68	-5.50934e-06	0.000215435	0.000325232
7.92	-2.86501e-05	0.000360595	6.01653e-05
8.16	-0.000102929	-2.81045e-06	-0.000136375
8.4	0.000354696	0.000212862	-7.10197e-05
8.64	-0.000319204	0.000182666	0.000225913
8.88	3.83415e-05	-0.000127103	0.000356318
9.12	0.000299385	-7.12328e-05	0.000141565
9.36	-0.000114049	0.000215941	2.72132e-05
9.6	0.000205543	0.000146035	0.000174085
9.84	-7.74286e-05	0.000129137	0.000225039
10.08	0.000390789	0.000150625	0.000218663
10.32	0.000155514	6.73245e-05	-0.000171521
10.56	-9.85694e-05	-0.000109517	-2.931e-05
10.8	0.000197446	0.000368194	-0.000174279
11.04	5.64079e-05	0.000716611	-0.000188975
11.28	-0.000316319	-0.000305439	5.88997e-05
11.52	0.000112772	0.00034007	2.72045e-05
11.76	0.00043873	-0.000594177	0.000113462
12	-0.000238308	-0.000183917	0.00013104
12.24	2.81837e-05	-0.000225293	-2.9251e-05
12.48	2.7342e-05	-0.000266628	-2.37953e-05
12.72	-0.000326564	0.000178642	8.59613e-05
12.96	-4.69434e-05	-0.000177821	-7.06991e-05
13.2	-5.70384e-05	-0.00017055	-0.000117876
13.44	-9.28285e-06	0.000102751	-0.000258805
13.68	0.000391721	0.000375454	2.48154e-05
13.92	-9.79139e-05	0.000174128	3.16714e-05
14.16	0.000219622	-0.000317951	-0.000134661
14.4	-0.000102129	0.000191052	-0.000119477
14.64	0.000240548	-0.000123339	7.60498e-05
14.88	-0.00024251	3.20848e-05	0.000148229
15.12	-2.30813e-06	-0.000150437	-0.00010676
15.36	-0.000143415	-0.000522738	0.000140353
15.6	8.01439e-05	-4.78911e-05	-0.000178543
15.84	0.000253703	-0.000319386	-5.8359e-05
16.08	0.000345807	0.000297737	-5.67727e-05
16.32	-2.70532e-05	-0.000141814	-0.000309808
16.56	-0.000344341	-0.000524218	6.62105e-05
16.8	0.000387679	0.000267165	5.2416e-05
17.04	1.85793e-05	0.000310752	2.85116e-05
17.28	4.18558e-05	-0.00016596	-4.83586e-05
17.52	-9.257e-05	-9.39651e-05	9.69493e-05
17.76	1.92417e-05	-7.52418e-05	-2.60988e-06
18	0.00010034	-4.23573e-05	-4.21309e-05
18.24	3.49118e-05	8.65532e-05	9.87923e-05
18.48	-2.3983e-05	8.63872e-05	0.000238066
18.72	-0.000262423	-3.02339e-05	-0.000180431
18.96	9.54359e-05	-0.00022702	7.71264e-05
19.2	0.000164312	-0.000383659	-6.94423e-05
19.44	-0.000265323	0.000186253	-0.00010198
19.68	-0.000106424	4.59082e-05	-0.000205847
19.92	-0.000148616	-0.00038644	7.02823e-07
20.16	6.82521e-05	-7.23004e-05	0.000158036
20.4	5.93003e-05	0.000158896	8.47667e-05
20.64	0.000118635	-0.000344888	-0.000277021
20.88	-0.00030994	0.000463601	-5.86942e-05
21.12	-0.000182847	-0.000218577	4.05047e-05
21.36	0.000150131	-0.000143539	-0.000220032
21.6	-9.69805e-05	7.50412e-05	-5.77801e-05
21.84	-7.6369e-05	-3.75783e-05	-0.000140249
22.08	-0.000212828	-0.000340401	2.97846e-05
22.32	-0.000401429	-1.82809e-05	0.000135264
22.56	7.20568e-05	2.60687e-05	-0.000170157
22.8	-0.000150295	0.000114433	0.000148153
23.04	-0.000473014	-0.000489822	8.11004e-05
23.28	-8.36551e-05	-4.26361e-05	3.72136e-05
23.52	-0.0001479	-5.97163e-05	-0.000540282
23.76	-0.000273229	0.00013416	-5.22516e-05
24	-0.000303123	0.000144838	-0.000316899
24.24	0.000105851	-0.000614862	-0.000198326
24.48	-0.000155228	-6.78949e-05	-3.20612e-05
24.72	-0.000243069	0.000159229	7.32398e-05
24.96	-0.00013014	-0.000269782	-6.10873e-05
25.2	-0.000226093	-7.0787e-05	-1.79187e-05
25.44	-0.000356142	-6.04771e-05	-0.000273362
25.68	5.01117e-05	-0.000132824	6.73543e-05
25.92	2.57278e-05	-0.000252241	-0.000336598
26.16	-0.000194352	-0.000401936	4.6904e-05
26.4	2.29794e-05	0.000135424	-0.000355394
26.64	2.14658e-05	8.35944e-05	-6.97156e-05
26.88	0.000104266	-0.000167109	-0.000207779
27.12	-0.000281535	-0.000236399	-0.000305093
27.36	7.13806e-05	0.000109076	-0.000170315
27.6	-8.67071e-05	-0.000109594	-0.00039002
27.84	4.21182e-05	0.000230464	-0.000176045
28.08	-2.11038e-05	-0.000194605	-5.45995e-05
28.32	-8.84587e-05	-0.000123943	-0.000204429
28.56	-8.68783e-05	-0.000220086	-5.80327e-05
28.8	8.87752e-05	-0.000205745	-0.000151367
29.04	-0.000406179	8.00726e-05	-0.00033071
29.28	-7.95185e-05	-0.000275109	-0.000163522
29.52	-1.29543e-05	-0.000534503	-0.000393281
29.76	-0.000196279	-0.00018817	-0.000144734
30	-8.49512e-05	-0.000152186	-0.000230617
30.24	-8.53634e-05	-0.000713647	6.32731e-05
30.48	0.000184252	-6.86725e-05	-0.000280724
30.72	-0.0100526	-0.00916764	-0.0102088
30.96	0.0704064	0.0552898	0.0677578
31.2	-0.064712	-0.0560293	-0.0634187
31.44	0.152267	0.130503	0.148368
31.68	0.01832711*	0.0149095*	0.01799851*
31.92	0.000675441	0.000213507	0.000739011
32.16	0.000955747	0.000420191	0.00109115
32.4	0.00115036	0.00034544	0.00104557
32.64	0.00121335	0.000464218	0.00179191
32.88	0.00161725	0.000858069	0.0018666
33.12	0.00179262	0.00106274	0.00173382
33.36	0.00210245	0.000921474	0.00224317
33.6	0.0020051	0.00104105	0.00200632
33.84	0.00243287	0.00120643	0.00255998
34.08	0.00246233	0.00148306	0.00258266
34.32	0.00272178	0.00161859	0.00281817
34.56	0.00290253	0.00175644	0.00284015
34.8	0.00292222	0.00095256	0.00328743
35.04	0.0029469	0.00211499	0.00319653
35.28	0.00373175	0.00145076	0.00327864
35.52	0.00358078	0.00195426	0.0033968
35.76	0.00408394	0.00168415	0.00395177
36	0.00395366	0.00241876	0.00362723
36.24	0.00391099	0.00216785	0.00403799
36.48	0.00430945	0.00231954	0.00409058
36.72	0.00478083	0.00204548	0.00450932
36.96	0.00502332	0.00249724	0.00431102
37.2	0.00484463	0.00202363	0.00459627
37.44	0.00478195	0.00205448	0.00472092
37.68	0.00499532	0.00263712	0.00464155
37.92	0.00487985	0.00282742	0.00494985
38.16	0.00518918	0.00278006	0.00472168
38.4	0.00541029	0.00277177	0.00489984
38.64	0.00547862	0.00237577	0.00531755
38.88	0.00515569	0.00260191	0.00513378
39.12	0.0056447	0.00313707	0.00531392
39.36	0.00596672	0.0028582	0.00564539
39.6	0.00584326	0.00356111	0.00527167
39.84	0.00573699	0.00320971	0.00573966
40.08	0.00595119	0.00319391	0.00534757
40.32	0.00593643	0.00308604	0.00585735
40.56	0.00635122	0.00297689	0.00576092
40.8	0.00648099	0.0029835	0.00604041
41.04	0.00676249	0.00336597	0.00596632
41.28	0.00657373	0.00396932	0.00605776
41.52	0.00668111	0.00372585	0.00611801
41.76	0.00660415	0.00410809	0.00622747
42	0.00670211	0.00348397	0.00609475
42.24	0.00703767	0.00405645	0.00626317
42.48	0.00697715	0.00385296	0.00655265
42.72	0.00699081	0.00392302	0.00650393
42.96	0.00701361	0.00390543	0.00663016
43.2	0.00691358	0.0037053	0.00668454
43.44	0.00700871	0.00397391	0.00660001
43.68	0.00724707	0.00410464	0.0065064
43.92	0.00755731	0.00413638	0.00651501
44.16	0.00745847	0.00404767	0.00707588
44.4	0.00773505	0.00393245	0.0068024
44.64	0.0077197	0.00370348	0.00699974
44.88	0.00747213	0.00405565	0.00700666
45.12	0.00746383	0.00427132	0.00682229
45.36	0.00805465	0.00400742	0.00718213
45.6	0.00777359	0.00369981	0.00702533
45.84	0.0077936	0.00478291	0.00729225
46.08	0.00820932	0.00410661	0.00694807
46.32	0.008072	0.00452453	0.0072085
46.56	0.00804375	0.00456959	0.00700393
46.8	0.00789441	0.00432301	0.0072249
47.04	0.007719	0.00429542	0.00745176
47.28	0.00817132	0.00505695	0.00749071
47.52	0.008232	0.00479304	0.00736969
47.76	0.00809983	0.00501054	0.00730458
48	0.00808461	0.00451441	0.00761046
48.24	0.00771337	0.00383071	0.0074269
48.48	0.00832786	0.00443189	0.00737717
48.72	0.0084679	0.00447109	0.00742651
48.96	0.00850159	0.00471271	0.00752517
49.2	0.00826369	0.00484844	0.00767488
49.44	0.00830183	0.00455772	0.00771554
49.68	0.0082917	0.00448271	0.00755415
49.92	0.00836015	0.00467147	0.00766905
50.16	0.00842276	0.00457317	0.0074879
50.4	0.00870953	0.00469555	0.00779204
50.64	0.00843608	0.00444768	0.00810797
50.88	0.00901865	0.00472516	0.0077422
51.12	0.0088219	0.0048453	0.00804366
51.36	0.00848867	0.00519969	0.00772003
51.6	0.00891828	0.00498302	0.00796276
51.84	0.00873276	0.00502421	0.00789421
52.08	0.00897609	0.00517867	0.00795137
52.32	0.00915354	0.00487189	0.00819371
52.56	0.00898634	0.00543222	0.00818484
52.8	0.00917093	0.00525529	0.00783858
53.04	0.00881664	0.00471734	0.00834857
53.28	0.0090162	0.0051564	0.00793142
53.52	0.00901611	0.00531336	0.00807207
53.76	0.00921798	0.0050805	0.00823312
54	0.00902253	0.00550398	0.00822964
54.24	0.00932281	0.00500426	0.00835536
54.48	0.00905078	0.00521395	0.00826804
54.72	0.00888313	0.00534455	0.00831749
54.96	0.00938892	0.00528354	0.00834238
55.2	0.00946926	0.00553954	0.00843496
55.44	0.00903056	0.00517864	0.00832219
55.68	0.00932734	0.00509913	0.00812544
55.92	0.00936202	0.00526954	0.00852349
56.16	0.00947816	0.00546216	0.00837378
56.4	0.00927641	0.00497234	0.00843127
56.64	0.00926331	0.00489557	0.00828298
56.88	0.009074	0.00590929	0.00822004
57.12	0.00937989	0.00553632	0.0082975
57.36	0.00969345	0.00502643	0.00850174
57.6	0.00960609	0.00573796	0.00853186
57.84	0.00936821	0.00587539	0.00838173
58.08	0.00913914	0.00561778	0.00849301
58.32	0.00969438	0.00544084	0.00863077
58.56	0.00957268	0.00570715	0.00881806
58.8	0.0094711	0.00566031	0.00873483
59.04	0.00961843	0.00548177	0.00897937
59.28	0.00964814	0.0054737	0.00850141
59.52	0.00964641	0.0057396	0.00878875
59.76	0.00951101	0.00524402	0.00857957
60	0.00963728	0.00564191	0.00869156
60.24	0.00941772	0.00585123	0.00847873
60.48	0.00992602	0.0059531	0.00854949
60.72	0.00971765	0.00528572	0.008772
60.96	0.009885	0.00566005	0.00879926
61.2	0.00950836	0.00582015	0.00887709
61.44	0.0096585	0.00569157	0.00861643
61.68	0.00987759	0.00564347	0.00861715
61.92	0.00961182	0.00562738	0.00891274
62.16	0.00959583	0.0059084	0.00870523
62.4	0.00971289	0.00568944	0.00872087
62.64	0.00946201	0.00617875	0.00880843
62.88	0.0101163	0.00607263	0.00886619
63.12	0.0101968	0.0058941	0.00881613
63.36	0.0100222	0.00573874	0.00897914
63.6	0.00986109	0.0058674	0.00904035
63.84	0.0101005	0.00630444	0.00871047
64.08	0.010307	0.00596346	0.00882385
64.32	0.00997194	0.00589379	0.00901068
64.56	0.0101864	0.00547579	0.00896871
64.8	0.010225	0.00649261	0.00911499
65.04	0.0101553	0.00596567	0.0089629
65.28	0.0102047	0.00597869	0.00898786
65.52	0.0100308	0.00635015	0.00890859
65.76	0.0101648	0.00558672	0.00902502
66	0.00992794	0.0064675	0.00900632
66.24	0.0104893	0.00594784	0.0092383
66.48	0.00974669	0.0064153	0.0089969
66.72	0.0101676	0.005931	0.00868689
66.96	0.0101832	0.00629704	0.0089859
67.2	0.009968	0.00623123	0.00918277
67.44	0.0102352	0.00630531	0.00917829
67.68	0.00997091	0.00617936	0.00901581
67.92	0.0101179	0.00624703	0.00920753
68.16	0.0100987	0.00637205	0.0091836
68.4	0.0100854	0.00624081	0.00916396
68.64	0.0106854	0.00646719	0.0090063
68.88	0.0101906	0.00637033	0.00919812
69.12	0.0101844	0.00611124	0.0093979
69.36	0.0100885	0.00616818	0.0090543
69.6	0.0101887	0.0058616	0.00917954
69.84	0.0101753	0.00604455	0.00915201
70.08	0.0102495	0.00623432	0.00900585
70.32	0.0103804	0.00646969	0.00951764
70.56	0.0104159	0.00607858	0.00928508
70.8	0.0102111	0.00625116	0.00907985
71.04	0.0106489	0.005831	0.0093003
71.28	0.0104155	0.00608878	0.00941798
71.52	0.0100912	0.00634837	0.00947869
71.76	0.0103391	0.00627341	0.0091285
72	0.0103786	0.00609212	0.00934797
72.24	0.0103415	0.00596628	0.00913056
72.48	0.0100203	0.00666571	0.00935015
72.72	0.010159	0.00619478	0.0093619
72.96	0.01078	0.00645413	0.0092519
73.2	0.0103316	0.00648824	0.00944904
73.44	0.0103359	0.00649572	0.0094623
73.68	0.0105917	0.00577475	0.00964002
73.92	0.0105502	0.00628987	0.00932892
74.16	0.0104089	0.00609137	0.00922833
74.4	0.0101415	0.0066024	0.00948801
74.64	0.0105034	0.00607023	0.00944903
74.88	0.0105378	0.00570107	0.00945208
75.12	0.0106581	0.00629453	0.0094193
75.36	0.0104829	0.0061864	0.00955591
75.6	0.0108684	0.00601494	0.00942005
75.84	0.0101747	0.00648105	0.00949268
76.08	0.0106243	0.00652193	0.00942089
76.32	0.0106355	0.00651012	0.00966684
76.56	0.0109753	0.00690904	0.00947549
76.8	0.0107799	0.00635308	0.00959579
77.04	0.00998509	0.00627043	0.00942782
77.28	0.0104756	0.00694346	0.00953018
77.52	0.0106926	0.00657262	0.00945049
77.76	0.0105533	0.00683467	0.00939968
78	0.0106036	0.00634151	0.00942388
78.24	0.0105847	0.00618581	0.00953644
78.48	0.0107119	0.00666466	0.00958645
78.72	0.0104989	0.00678004	0.00950126
78.96	0.0108793	0.00613981	0.00984004
79.2	0.0103878	0.00592872	0.0094684
79.44	0.010457	0.00634138	0.00963509
79.68	0.0105992	0.00634479	0.00939094
79.92	0.0104351	0.00690936	0.00962572
80.16	0.0110237	0.00708261	0.0092172
80.4	0.0105098	0.00652266	0.00981213
80.64	0.0108462	0.00676116	0.00963432
80.88	0.0107077	0.00673889	0.00957407
81.12	0.0106768	0.0063141	0.0097728
81.36	0.0105628	0.0064191	0.00972047
81.6	0.0107844	0.00621329	0.00951848
81.84	0.0105208	0.00643323	0.00953727
82.08	0.0107108	0.00679497	0.00962657
82.32	0.010789	0.00618844	0.00972068
82.56	0.0107144	0.00677077	0.00965168
82.8	0.0109835	0.00665824	0.00962892
83.04	0.0110415	0.00704685	0.00946911
83.28	0.0108897	0.00661189	0.00970275
83.52	0.0103843	0.00659625	0.00991682
83.76	0.0107351	0.00702349	0.00997029
84	0.0106287	0.00671914	0.00955302
84.24	0.0109905	0.00675185	0.00936086
84.48	0.0107424	0.00611493	0.00949339
84.72	0.0108649	0.00639284	0.00986546
84.96	0.0106909	0.00705157	0.0096661
85.2	0.0107391	0.00597721	0.00976962
85.44	0.0104176	0.00657722	0.00983871
85.68	0.0108987	0.00675587	0.00990335
85.92	0.011234	0.00693509	0.00995298
86.16	0.0109614	0.00689574	0.00941642
86.4	0.0110527	0.00613816	0.00986056
86.64	0.0109437	0.00672402	0.00959077
86.88	0.0109734	0.00700236	0.00997059
87.12	0.0108998	0.00723844	0.00971971
87.36	0.0108236	0.0067623	0.00968188
87.6	0.0108456	0.00650326	0.00980704
87.84	0.0106061	0.00607756	0.0097779
88.08	0.0105522	0.00693495	0.00974891
88.32	0.0110105	0.0067133	0.00992118
88.56	0.0110958	0.00672362	0.0099156
88.8	0.0108306	0.00627566	0.00991655
89.04	0.0112445	0.0067447	0.00979704
89.28	0.010887	0.00718681	0.00975145
89.52	0.011056	0.00688286	0.00988659
89.76	0.0111356	0.00670041	0.00975541
90	0.0110428	0.00716983	0.0099483
90.24	0.0107928	0.00694895	0.00961297
90.48	0.0109416	0.0066226	0.0101575
90.72	0.0107137	0.00656578	0.0101567
90.96	0.0110546	0.00669391	0.0100242
91.2	0.0107689	0.00677448	0.00979332
91.44	0.0105717	0.00678869	0.0101263
91.68	0.0108529	0.00732075	0.0100474
91.92	0.0103872	0.00680637	0.00999235
92.16	0.0109976	0.00705164	0.00991012
92.4	0.0108432	0.00674535	0.00996603
92.64	0.0108334	0.00700538	0.00987335
92.88	0.010723	0.0073888	0.0100367
93.12	0.0105872	0.00664313	0.00989096
93.36	0.0109887	0.00649159	0.01018
93.6	0.0111516	0.0062833	0.00991616
93.84	0.0114462	0.00693019	0.00990677
94.08	0.0112309	0.00717464	0.0101919
94.32	0.0106608	0.00695747	0.0101664
94.56	0.0107833	0.00690714	0.0101577
94.8	0.0110234	0.00762937	0.0101743
95.04	0.0108351	0.00661878	0.00984044
95.28	0.010715	0.00676871	0.00992898
95.52	0.0105851	0.00706487	0.00999888
95.76	0.0110535	0.00656286	0.0102215
96	0.0109413	0.00669084	0.00995842
96.24	0.0108825	0.00716484	0.0102225
96.48	0.0109686	0.00711416	0.00990475
96.72	0.0109167	0.00653204	0.0103377
96.96	0.0109945	0.00706765	0.00988455
97.2	0.0113862	0.00694344	0.0102448
97.44	0.0111415	0.0075625	0.0098814
97.68	0.0110413	0.00732484	0.0100414
97.92	0.01113	0.00741485	0.0102004
98.16	0.0113393	0.00687947	0.0100818
98.4	0.0111929	0.00673419	0.00982604
98.64	0.010987	0.00770622	0.00975267
98.88	0.0111176	0.00650532	0.00983428
99.12	0.0110964	0.00670386	0.010172
99.36	0.0113165	0.00677774	0.00995924
99.6	0.0109631	0.00690301	0.010286
99.84	0.0107378	0.00720149	0.00997314
100.08	0.0111286	0.00657639	0.0103367
100.32	0.0109267	0.00720382	0.0103723
100.56	0.0112544	0.0074926	0.0102657
100.8	0.0114032	0.00729174	0.010096
101.04	0.0109318	0.00725925	0.0103212
101.28	0.0106358	0.00708636	0.0100869
101.52	0.0113721	0.00696495	0.0103115
101.76	0.0110239	0.00672562	0.0102244
102	0.011228	0.00674734	0.0100407
102.24	0.0107401	0.00665559	0.0101547
102.48	0.0111774	0.00671702	0.0102131
102.72	0.0112241	0.00673547	0.00984216
102.96	0.0108558	0.00755948	0.0102402
103.2	0.0111894	0.00693037	0.00999226
103.44	0.0110447	0.00699326	0.0103801
103.68	0.0109852	0.00701127	0.0102973
103.92	0.0109524	0.0069155	0.0101183
104.16	0.0111743	0.00706496	0.0104022
104.4	0.0109639	0.00725496	0.0101934
104.64	0.011366	0.0072723	0.0103416
104.88	0.0108009	0.00698223	0.0100274
105.12	0.0115915	0.00748781	0.010321
105.36	0.0107164	0.00722866	0.0102042
105.6	0.011067	0.00694545	0.0105225
105.84	0.0111859	0.00728708	0.0103849
106.08	0.0109562	0.00703255	0.010267
106.32	0.0108037	0.00716492	0.0104021
106.56	0.0111829	0.00727871	0.0103426
106.8	0.0107505	0.00752358	0.0102205
107.04	0.0110981	0.00700567	0.0105096
107.28	0.0110299	0.00725188	0.0103973
107.52	0.0114019	0.0069597	0.0104528
107.76	0.0112469	0.00710572	0.0099907
108	0.0106588	0.00743907	0.00991158
108.24	0.0106804	0.00714371	0.0101125
108.48	0.0112076	0.00681582	0.0103325
108.72	0.0113747	0.00709973	0.0103208
108.96	0.0115193	0.00737587	0.0104813
109.2	0.0111662	0.00717659	0.0103182
109.44	0.0112332	0.00689252	0.0101796
109.68	0.0114008	0.00672094	0.0103433
109.92	0.0111296	0.00699007	0.0105791
110.16	0.0111987	0.0072965	0.0105767
110.4	0.0112233	0.0074583	0.010311
110.64	0.0110584	0.00712411	0.0103003
110.88	0.0112376	0.00697652	0.00999847
111.12	0.0110399	0.00709006	0.0104637
111.36	0.0112283	0.00709103	0.0102779
111.6	0.0111424	0.00673406	0.0104817
111.84	0.0114456	0.00679925	0.0103208
112.08	0.0109839	0.0071888	0.0105653
112.32	0.0113156	0.00701071	0.010245
112.56	0.011558	0.00686876	0.0103989
112.8	0.0112834	0.00670366	0.0104694
113.04	0.0110007	0.00710718	0.010298
113.28	0.0113586	0.00689222	0.0103234
113.52	0.011348	0.00740229	0.0103532
113.76	0.0111956	0.00771341	0.0103889
114	0.0112426	0.00688452	0.0102307
114.24	0.0109971	0.00718949	0.0101019
114.48	0.0112867	0.00700773	0.0103222
114.72	0.0113686	0.00701939	0.0102747
114.96	0.0115856	0.00650766	0.0102877
115.2	0.0114134	0.00705179	0.0103659
115.44	0.0113431	0.00684088	0.010402
115.68	0.0112577	0.00692208	0.0105185
115.92	0.0113911	0.00821228	0.0103986
116.16	0.0112626	0.0074988	0.0104902
116.4	0.0110622	0.00772432	0.0105069
116.64	0.0110125	0.00714243	0.0105238
116.88	0.0115229	0.00723611	0.0106669
117.12	0.0114167	0.00680667	0.0100968
117.36	0.0110997	0.00714636	0.0103554
117.6	0.0111464	0.00720127	0.0104642
117.84	0.0110665	0.00722128	0.0101849
118.08	0.0112986	0.0064758	0.0104288
118.32	0.0109826	0.00737358	0.0104605
118.56	0.0111961	0.00746124	0.0103277
118.8	0.011286	0.00641669	0.0104597
119.04	0.0112493	0.00734459	0.0103547
119.28	0.0108728	0.00749386	0.0106788
119.52	0.0111571	0.00697054	0.0107007
119.76	0.0111931	0.00749314	0.0104813
120	0.0113938	0.00748853	0.0106431
120.24	0.0111104	0.0072648	0.0103762
120.48	0.0112103	0.00757521	0.0102473
120.72	0.0112202	0.00742164	0.0103439
120.96	0.0110512	0.00728512	0.0108922
121.2	0.0112567	0.00708692	0.0104167
121.44	0.0119277	0.00737272	0.0106283
121.68	0.0116139	0.00737255	0.0104341
121.92	0.0115538	0.00726666	0.0102924
122.16	0.0111052	0.00729054	0.0104195
122.4	0.0113879	0.00767399	0.0104002
122.64	0.0111543	0.0078826	0.0103697
122.88	0.0111511	0.00702084	0.010534
123.12	0.0115425	0.00729892	0.0105206
123.36	0.0108551	0.00734789	0.0104094
123.6	0.0114292	0.00756772	0.0105044
123.84	0.0113395	0.00788162	0.0105205
124.08	0.0115592	0.00784026	0.0104587
124.32	0.0113181	0.00702841	0.0105812
124.56	0.0115328	0.00701092	0.0106615
124.8	0.0113274	0.00745915	0.0104292
125.04	0.0111721	0.007136	0.0104884
125.28	0.0113189	0.0070755	0.0103882
125.52	0.0114013	0.00759382	0.010923
125.76	0.0112452	0.00745285	0.0104836
126	0.0107667	0.00718331	0.0106357
126.24	0.0111007	0.00737638	0.0105291
126.48	0.0117226	0.00722141	0.0103793
126.72	0.0113441	0.00730463	0.0104547
126.96	0.0104997	0.0074035	0.0105485
127.2	0.0113659	0.00704758	0.0104567
127.44	0.0114462	0.00716458	0.0103903
127.68	0.0111926	0.00743648	0.0104824
127.92	0.0115119	0.00756008	0.0107847
128.16	0.0112106	0.00710546	0.0104096
128.4	0.0111654	0.00765744	0.0104309
128.64	0.0111255	0.00719749	0.0105868
128.88	0.0113757	0.00763374	0.0106413
129.12	0.0111853	0.00710945	0.0106009
129.36	0.01141	0.00689823	0.0107047
129.6	0.0112065	0.00705999	0.0106324
129.84	0.0112435	0.00742763	0.0106586
130.08	0.0110819	0.00721003	0.0106024
130.32	0.0115123	0.00732721	0.0102785
130.56	0.0112642	0.00753048	0.0101582
130.8	0.0116656	0.00731663	0.0104911
131.04	0.0111972	0.00797186	0.0107271
131.28	0.0108226	0.00727947	0.010222
131.52	0.0116796	0.00764957	0.0103774
131.76	0.0115304	0.00774964	0.0106785
132	0.0111147	0.00729525	0.010749
132.24	0.0118452	0.00726932	0.0104937
132.48	0.0111393	0.00762125	0.0108115
132.72	0.0116457	0.0076617	0.0106695
132.96	0.0111174	0.00721907	0.0103416
133.2	0.0112323	0.00767709	0.0103892
133.44	0.0112602	0.00750423	0.0105099
133.68	0.0114444	0.0069949	0.0106559
133.92	0.0112817	0.00736254	0.0104552
134.16	0.0113939	0.00737858	0.0107033
134.4	0.011245	0.00778226	0.010589
134.64	0.0113776	0.00755534	0.0107944
134.88	0.0109768	0.00736634	0.0105494
135.12	0.0113144	0.00768424	0.0103347
135.36	0.0113877	0.00704148	0.0104949
135.6	0.0117468	0.00732473	0.0104532
135.84	0.0115503	0.00735347	0.0104245
136.08	0.0111381	0.00769977	0.0106558
136.32	0.0111032	0.00721862	0.0104555
136.56	0.011318	0.00768648	0.0109403
136.8	0.0114864	0.00706724	0.010674
137.04	0.0110795	0.0073441	0.0103963
137.28	0.0113692	0.00770226	0.0105239
137.52	0.0113665	0.00755069	0.0105834
137.76	0.0115045	0.00765511	0.0107073
138	0.0113253	0.00733711	0.0106082
138.24	0.0113059	0.00765259	0.01066
138.48	0.0113711	0.00717276	0.0106436
138.72	0.0114608	0.00800627	0.0109152
138.96	0.0116301	0.00745	0.0105878
139.2	0.0112961	0.00727545	0.0105445
139.44	0.0115924	0.00757444	0.0106768
139.68	0.0113639	0.00782195	0.0108109
139.92	0.0117377	0.00770997	0.0107382
140.16	0.0109395	0.00741508	0.0106782
140.4	0.0115157	0.00780877	0.0103092
140.64	0.0113499	0.00733528	0.0104131
140.88	0.0111206	0.00729526	0.0103583
141.12	0.0110601	0.00765647	0.0107055
141.36	0.0115538	0.00716203	0.010706
141.6	0.0115563	0.00754184	0.0106713
141.84	0.01154	0.00697078	0.010568
142.08	0.0114417	0.00759993	0.0108606
142.32	0.0110214	0.00787498	0.0103309
142.56	0.011369	0.00742354	0.0106666
142.8	0.0111856	0.00761081	0.0105604
143.04	0.0116203	0.00760914	0.0104294
143.28	0.0114123	0.00791435	0.0107541
143.52	0.0114907	0.00794907	0.010351
143.76	0.011736	0.00715955	0.0107046
144	0.0115028	0.00757315	0.0105887
144.24	0.0113095	0.00730203	0.0105683
144.48	0.0115645	0.00755514	0.0108531
144.72	0.0112796	0.00767782	0.0105556
144.96	0.0110672	0.00796456	0.0105446
145.2	0.0113547	0.0077143	0.0106161
145.44	0.0116017	0.00795039	0.0107823
145.68	0.0115536	0.00712277	0.0106117
145.92	0.0114264	0.00760662	0.0104983
146.16	0.0114167	0.00750135	0.0107551
146.4	0.0113751	0.00730501	0.0104616
146.64	0.0112139	0.00733858	0.0104207
146.88	0.011093	0.00779043	0.0109616
147.12	0.0112471	0.00762589	0.0105806
147.36	0.011676	0.00789491	0.010843
147.6	0.0112875	0.00719006	0.0106507
147.84	0.0110958	0.00718576	0.0108182
148.08	0.0112619	0.00750768	0.0107442
148.32	0.0113936	0.00751103	0.0106499
148.56	0.0112776	0.00765357	0.01041
148.8	0.0117337	0.0074384	0.0102809
149.04	0.0114413	0.00760493	0.0107348
149.28	0.0114418	0.007389	0.0106228
149.52	0.0114079	0.00789294	0.0108833
149.76	0.0113629	0.00750892	0.0105567
150	0.01117	0.00762176	0.0107396
150.24	0.011925	0.00769343	0.0114447
150.48	0.0120603	0.00845513	0.0118494
150.72	0.00146015	0.000311351	0.000960952
150.96	0.0676712	0.0541922	0.0649631
151.2	-0.0586104	-0.0511251	-0.0571421
151.44	0.199754	0.160838	0.19205
151.68	0.0331565	0.0278322	0.0325717
151.92	0.0143704	0.0118493	0.0150836
152.16	0.0146071	0.0122895	0.0156714
152.4	0.0153406	0.0127336	0.0158201
152.64	0.0148167	0.0129929	0.0162227
152.88	0.0152898	0.0132452	0.0164774
153.12	0.0154557	0.0132878	0.0167468
153.36	0.0157527	0.0140007	0.0170248
153.6	0.0155368	0.0143521	0.0173809
153.84	0.0159959	0.0138876	0.0172565
154.08	0.0162514	0.0143481	0.0177363
154.32	0.0162881	0.0141784	0.0177774
154.56	0.0163566	0.0147425	0.0179709
154.8	0.016513	0.0143319	0.0182503
155.04	0.0163818	0.0143616	0.0181194
155.28	0.0171473	0.0146704	0.0184378
155.52	0.0170702	0.0142872	0.0189665
155.76	0.0174429	0.0154932	0.0189854
156	0.0171411	0.0153087	0.0193042
156.24	0.0172891	0.0161758	0.0188894
156.48	0.0175823	0.015413	0.0191687
156.72	0.0178503	0.0159051	0.0194586
156.96	0.0175772	0.0162199	0.0193818
157.2	0.0180034	0.0154902	0.0196715
157.44	0.0177684	0.0163125	0.0197748
157.68	0.0182951	0.0159879	0.0199356
157.92	0.0181123	0.0159921	0.0197384
158.16	0.0181527	0.0163557	0.0198688
158.4	0.0182027	0.0164373	0.020069
158.64	0.0184434	0.0162069	0.0202762
158.88	0.0183128	0.016127	0.0205592
159.12	0.0185255	0.0168928	0.0203023
159.36	0.0182904	0.0171956	0.0206947
159.6	0.0183282	0.0167055	0.0205084
159.84	0.0188805	0.0170174	0.0205151
160.08	0.0185411	0.0169773	0.0203396
160.32	0.0185791	0.0167643	0.0205002
160.56	0.0186987	0.016561	0.0207437
160.8	0.0192553	0.0165875	0.0207874
161.04	0.0190596	0.0173994	0.0204867
161.28	0.0189709	0.0172643	0.0208612
161.52	0.0193537	0.0168726	0.0210527
161.76	0.01883	0.0169324	0.0210939
162	0.0194481	0.0174248	0.0211572
162.24	0.0196589	0.0172784	0.0213358
162.48	0.0189411	0.0170566	0.0212807
162.72	0.0192896	0.0169457	0.0211896
162.96	0.0193711	0.0169591	0.0213317
163.2	0.0191644	0.0170604	0.0216522
163.44	0.0197841	0.0171214	0.0213818
163.68	0.0195158	0.0178501	0.0212556
163.92	0.0197299	0.0174854	0.0216641
164.16	0.0200147	0.0177618	0.0216182
164.4	0.0198449	0.0180744	0.0217952
164.64	0.0197959	0.0172239	0.0216958
164.88	0.0194796	0.0174132	0.0216396
165.12	0.0199187	0.0178552	0.021995
165.36	0.0198403	0.0177204	0.0220817
165.6	0.0202053	0.0179861	0.0221076
165.84	0.0196409	0.0176459	0.0220293
166.08	0.0203108	0.0177535	0.0220911
166.32	0.0199717	0.0176419	0.0220981
166.56	0.0199935	0.0177733	0.0219382
166.8	0.0197784	0.0176929	0.0221489
167.04	0.020295	0.0180816	0.0221448
167.28	0.0202415	0.0180237	0.0224258
167.52	0.0203134	0.0180677	0.0219632
167.76	0.0201512	0.0180639	0.0226125
168	0.0202162	0.0176141	0.0223938
168.24	0.0199415	0.0177919	0.0226675
168.48	0.0204589	0.0177417	0.022665
168.72	0.0202936	0.0179912	0.0227768
168.96	0.0206404	0.0182185	0.0220486
169.2	0.0204277	0.0181892	0.0225188
169.44	0.0206289	0.0180149	0.0225673
169.68	0.0206875	0.0182503	0.0226016
169.92	0.0207087	0.0180162	0.0223611
170.16	0.0208905	0.0181334	0.0230093
170.4	0.0206344	0.0183176	0.0227157
170.64	0.0208794	0.0183515	0.0227254
170.88	0.0207239	0.0181027	0.0227076
171.12	0.0208895	0.0179734	0.0223876
171.36	0.0212268	0.0180973	0.0225227
171.6	0.0204497	0.0183683	0.0228008
171.84	0.0206916	0.0180733	0.0226945
172.08	0.0204104	0.0186429	0.0227084
172.32	0.0206747	0.0183036	0.0226852
172.56	0.0206574	0.0182584	0.0231873
172.8	0.0209968	0.018177	0.0228652
173.04	0.02077	0.0182317	0.0226831
173.28	0.0211619	0.0183524	0.0227896
173.52	0.0209906	0.0182558	0.0230266
173.76	0.0208391	0.0185453	0.0231684
174	0.0210804	0.0184301	0.0234274
174.24	0.0211101	0.0187204	0.0229108
174.48	0.0211126	0.0182491	0.0230482
174.72	0.0211184	0.0182684	0.0231893
174.96	0.0215042	0.0180841	0.0232187
175.2	0.0209132	0.0182411	0.0230644
175.44	0.0208561	0.0182227	0.0235729
175.68	0.0209153	0.0180743	0.0232534
175.92	0.0213085	0.0183165	0.0234017
176.16	0.0212136	0.018414	0.0234903
176.4	0.02134	0.0186128	0.0232537
176.64	0.0212839	0.0188576	0.0233895
176.88	0.0213497	0.0187228	0.0233031
177.12	0.0213235	0.0184078	0.0235918
177.36	0.0216368	0.0189582	0.0232144
177.6	0.0209733	0.0182615	0.0237412
177.84	0.0210417	0.0186274	0.0232115
178.08	0.0212417	0.0184583	0.0231798
178.32	0.0209709	0.0189322	0.0233315
178.56	0.0211075	0.018416	0.0231959
178.8	0.0212188	0.0190472	0.0232798
179.04	0.0214399	0.0189354	0.0231954
179.28	0.0208256	0.0185124	0.0233182
179.52	0.0215174	0.0186915	0.0234539
179.76	0.0212963	0.0185181	0.0233861
180	0.0214866	0.0190039	0.0234415
180.24	0.0211136	0.0184498	0.0236761
180.48	0.0217209	0.0187824	0.0233654
180.72	0.0211789	0.0188617	0.0236638
180.96	0.0213389	0.0192742	0.023782
181.2	0.0217048	0.0189843	0.0239894
181.44	0.0215944	0.0190885	0.0235843
181.68	0.0214633	0.0183539	0.0236169
181.92	0.0217128	0.0183221	0.0235464
182.16	0.0214003	0.0186968	0.0236064
182.4	0.0214865	0.018448	0.0237255
182.64	0.0215702	0.0186832	0.0239119
182.88	0.0212965	0.0185826	0.0240097
183.12	0.0216903	0.0184188	0.0236851
183.36	0.0213606	0.0189874	0.0234998
183.6	0.0218409	0.019203	0.0235277
183.84	0.0217274	0.019134	0.0232974
184.08	0.0215538	0.0188141	0.0234608
184.32	0.0217421	0.0190321	0.023624
184.56	0.0215054	0.0190133	0.0235298
184.8	0.0213781	0.0187955	0.0236623
185.04	0.0213855	0.0195584	0.0233597
185.28	0.0215567	0.0189383	0.0238976
185.52	0.0217911	0.0185807	0.0238336
185.76	0.0213382	0.0185803	0.0237651
186	0.0218954	0.0197728	0.0233283
186.24	0.021977	0.0186805	0.0238269
186.48	0.0215484	0.0189861	0.0237876
186.72	0.0214783	0.0195008	0.0241656
186.96	0.0212754	0.0194075	0.0237636
187.2	0.0220845	0.0192969	0.0238258
187.44	0.0217192	0.0187769	0.0238851
187.68	0.0217669	0.0183501	0.0241873
187.92	0.021671	0.0189253	0.0238008
188.16	0.0218159	0.0195481	0.0240093
188.4	0.0218893	0.0193442	0.0235615
188.64	0.0215497	0.018918	0.0240127
188.88	0.022001	0.0188857	0.0237022
189.12	0.0218766	0.0192734	0.0238226
189.36	0.0214687	0.0190686	0.0238765
189.6	0.0218978	0.0189139	0.0239642
189.84	0.0219035	0.0190544	0.0239259
190.08	0.0217983	0.019329	0.0240606
190.32	0.0219385	0.0189354	0.024483
190.56	0.0218947	0.0189864	0.0238911
190.8	0.0219114	0.019397	0.0240149
191.04	0.0219251	0.0191539	0.0239805
191.28	0.0218208	0.0187257	0.023971
191.52	0.021833	0.0192523	0.0238515
191.76	0.0219426	0.0198739	0.0240655
192	0.0214406	0.0186039	0.0238941
192.24	0.0218385	0.01921	0.0238839
192.48	0.0221197	0.0191316	0.0240748
192.72	0.0220918	0.0185066	0.0236834
192.96	0.0218724	0.0190415	0.0241727
193.2	0.0220478	0.0190834	0.0241161
193.44	0.0221756	0.0188546	0.0243539
193.68	0.0221701	0.0191131	0.0242146
193.92	0.0219265	0.0192562	0.024036
194.16	0.0220939	0.018699	0.024025
194.4	0.0219422	0.0188451	0.024019
194.64	0.0219488	0.0184069	0.0241725
194.88	0.021663	0.0188807	0.0245091
195.12	0.0217366	0.0192936	0.0241835
195.36	0.0218482	0.0191494	0.0240872
195.6	0.0218659	0.0193396	0.0241974
195.84	0.0222976	0.0198258	0.0242054
196.08	0.0221809	0.0191069	0.0245684
196.32	0.0219985	0.0190007	0.0239537
196.56	0.021964	0.019584	0.0242722
196.8	0.0223429	0.0191432	0.0239816
197.04	0.0219073	0.0192817	0.024039
197.28	0.0221331	0.0188552	0.0242548
197.52	0.0221782	0.0186892	0.0241938
197.76	0.0217152	0.0195405	0.024021
198	0.022014	0.0189886	0.0243858
198.24	0.0221397	0.0189875	0.0243436
198.48	0.0218378	0.0192113	0.0237775
198.72	0.0217278	0.0195764	0.0240287
198.96	0.0218698	0.0194962	0.0240129
199.2	0.0219522	0.0191286	0.0241925
199.44	0.0222497	0.0191361	0.0241163
199.68	0.0219535	0.0198795	0.0242118
199.92	0.022127	0.0192752	0.024117
200.16	0.0224121	0.0191898	0.0241193
200.4	0.0217568	0.0188969	0.0239549
200.64	0.0220778	0.0187214	0.0240896
200.88	0.0220064	0.0189715	0.0244296
201.12	0.0222746	0.0193002	0.0242207
201.36	0.0218606	0.0190662	0.0242875
201.6	0.0220507	0.0194468	0.0240681
201.84	0.0221804	0.0190022	0.0242986
202.08	0.0218885	0.0192913	0.0241861
202.32	0.0219163	0.0193986	0.0240294
202.56	0.0222255	0.0190773	0.0242619
202.8	0.021982	0.0187804	0.0242037
203.04	0.0222175	0.0186945	0.0242726
203.28	0.0220956	0.0191468	0.0240657
203.52	0.0223733	0.0192638	0.0242642
203.76	0.0221991	0.0195275	0.0244301
204	0.0219626	0.019267	0.0242733
204.24	0.0219602	0.0190445	0.0244532
204.48	0.0222377	0.0188748	0.0241704
204.72	0.0218699	0.0194767	0.0244369
204.96	0.0223163	0.0192725	0.0240224
205.2	0.0221192	0.0190856	0.0243872
205.44	0.0219989	0.0191023	0.0244208
205.68	0.022036	0.018808	0.0243073
205.92	0.0220408	0.0190169	0.0242169
206.16	0.0223072	0.0192463	0.0243951
206.4	0.0215281	0.0189657	0.0242923
206.64	0.022063	0.0194055	0.0243483
206.88	0.0219733	0.0189127	0.0245198
207.12	0.0223823	0.0194003	0.0246174
207.36	0.0218166	0.0184986	0.02414
207.6	0.0220174	0.0188638	0.0240449
207.84	0.0219492	0.0189288	0.0242205
208.08	0.021784	0.019602	0.0244144
208.32	0.0220037	0.0191523	0.0239233
208.56	0.022308	0.0192684	0.0239592
208.8	0.0218129	0.0187668	0.0241145
209.04	0.0221701	0.0185997	0.024005
209.28	0.0225968	0.0193636	0.0243603
209.52	0.022154	0.0186824	0.0239775
209.76	0.0221497	0.0189486	0.0242233
210	0.0220682	0.0193119	0.0243621
210.24	0.0220023	0.0194694	0.0243994
210.48	0.0223525	0.0187528	0.0241577
210.72	0.0220249	0.0196153	0.0242019
210.96	0.0221241	0.0192027	0.02407
211.2	0.0222473	0.0195466	0.0242585
211.44	0.0220872	0.0190974	0.0243484
211.68	0.022093	0.0192341	0.02391
211.92	0.0222611	0.0191846	0.0243691
212.16	0.0222508	0.0189584	0.0243141
212.4	0.0215297	0.0192407	0.0243188
212.64	0.0220955	0.0186176	0.0244567
212.88	0.0218122	0.0193966	0.024053
213.12	0.0221764	0.0192609	0.0240427
213.36	0.022261	0.0188476	0.024237
213.6	0.0222611	0.0191621	0.0240943
213.84	0.02224	0.0191299	0.0240756
214.08	0.0221374	0.0188168	0.0241744
214.32	0.0222439	0.0192802	0.0240917
214.56	0.0217106	0.0191762	0.0241196
214.8	0.0221521	0.0194327	0.0247566
215.04	0.0220594	0.0196639	0.0241377
215.28	0.0222216	0.0189939	0.0242363
215.52	0.0222277	0.0188029	0.0242091
215.76	0.0220214	0.0191919	0.0241546
216	0.0217301	0.0193421	0.0244166
216.24	0.0217948	0.0193094	0.0246164
216.48	0.0216837	0.0191978	0.0242215
216.72	0.0212435	0.0186122	0.0244481
216.96	0.0222011	0.0193184	0.024018
217.2	0.0222435	0.0193952	0.0242851
217.44	0.0221163	0.0185756	0.0238265
217.68	0.022012	0.0185432	0.0242883
217.92	0.0223282	0.019489	0.0241199
218.16	0.0214868	0.0188313	0.0242943
218.4	0.0222743	0.0190306	0.0239657
218.64	0.0221321	0.0193806	0.0243048
218.88	0.0219144	0.0191776	0.0245722
219.12	0.0220655	0.0193926	0.0245455
219.36	0.0219932	0.0188929	0.0242525
219.6	0.0218084	0.0188998	0.0243468
219.84	0.0219321	0.0192344	0.0244926
220.08	0.0222913	0.0195106	0.0242869
220.32	0.0217442	0.0184718	0.0239538
220.56	0.0220363	0.0188375	0.0243991
220.8	0.0220229	0.0193662	0.0238229
221.04	0.0220083	0.0188371	0.0242701
221.28	0.0218166	0.0184674	0.0246001
221.52	0.0219082	0.0191337	0.0239869
221.76	0.021692	0.0183977	0.0237524
222	0.0217798	0.0196728	0.0239182
222.24	0.0219008	0.0189566	0.0241776
222.48	0.0221041	0.0191345	0.0244601
222.72	0.022063	0.0183429	0.023948
222.96	0.0222577	0.0182576	0.024105
223.2	0.0219626	0.019027	0.0240658
223.44	0.0219591	0.0189975	0.0239791
223.68	0.0221303	0.0189728	0.024249
223.92	0.0215945	0.0186081	0.0240905
224.16	0.0220911	0.018952	0.0240419
224.4	0.0223657	0.0191137	0.0240467
224.64	0.0219959	0.0185835	0.0242994
224.88	0.0221308	0.0188121	0.0239983
225.12	0.022084	0.0190318	0.0239498
225.36	0.0221969	0.0189885	0.0240377
225.6	0.0220483	0.0191463	0.0240661
225.84	0.0222368	0.0182514	0.0242309
226.08	0.021959	0.0185588	0.0239899
226.32	0.0220427	0.0185455	0.0241524
226.56	0.021669	0.0188193	0.0244646
226.8	0.0218667	0.0183747	0.0238457
227.04	0.0219085	0.019108	0.0238528
227.28	0.0218136	0.0192195	0.0238759
227.52	0.0221447	0.0185882	0.0239249
227.76	0.0218732	0.0189091	0.0241792
228	0.0220502	0.0188529	0.0243056
228.24	0.0221548	0.0194289	0.0239926
228.48	0.0220365	0.0188936	0.0240736
228.72	0.0218612	0.0190106	0.0242674
228.96	0.0217015	0.0190586	0.0243359
229.2	0.0217606	0.0192041	0.0239637
229.44	0.0217427	0.0190278	0.023826
229.68	0.0220981	0.0191107	0.0238886
229.92	0.0221754	0.0182231	0.0242217
230.16	0.0220431	0.0191062	0.0242438
230.4	0.0222826	0.0187936	0.0238524
230.64	0.0220211	0.0190109	0.0241282
230.88	0.0216572	0.0188397	0.0239397
231.12	0.0219771	0.0193569	0.0238346
231.36	0.0221326	0.0192039	0.0241916
231.6	0.0219803	0.0187785	0.0238927
231.84	0.022137	0.0184424	0.0238306
232.08	0.0218694	0.0183968	0.0241796
232.32	0.0218022	0.0188914	0.0241206
232.56	0.0220181	0.019296	0.0236005
232.8	0.0214637	0.0183329	0.0242599
233.04	0.0219755	0.0196307	0.0239683
233.28	0.0220712	0.0187199	0.0241596
233.52	0.0218362	0.0190411	0.0238259
233.76	0.0221529	0.0186582	0.0239178
234	0.0218569	0.0186982	0.0239878
234.24	0.021759	0.0196967	0.0239975
234.48	0.0217029	0.0188451	0.0238689
234.72	0.0222048	0.0188918	0.0237991
234.96	0.0218037	0.0184902	0.0241353
235.2	0.0217729	0.0185357	0.0236578
235.44	0.0216266	0.0189209	0.0239561
235.68	0.022178	0.0187438	0.0238683
235.92	0.0219541	0.0189779	0.0241851
236.16	0.0220101	0.019201	0.0237597
236.4	0.0219738	0.0181886	0.0242688
236.64	0.0219837	0.0183558	0.0237955
236.88	0.0217472	0.0188854	0.0238835
237.12	0.0217916	0.0190372	0.0239153
237.36	0.0217233	0.0187132	0.0238715
237.6	0.0216892	0.0186838	0.0238671
237.84	0.0219631	0.0187887	0.0241499
238.08	0.0215724	0.0188255	0.0238268
238.32	0.0219487	0.0184495	0.0237902
238.56	0.0221199	0.0183272	0.0237453
238.8	0.0218918	0.0186386	0.0239244
239.04	0.0216572	0.0186637	0.02427
239.28	0.0217024	0.0186348	0.0241686
239.52	0.0219812	0.0184236	0.0239086
239.76	0.0221602	0.0185155	0.0239909

## Sheet: Control
Time	Exp1	Exp2	Exp3	Exp4
0	0.000105	-8.5e-05	0.000129	0.000492
0.24	0.000399	0.000316	0.000369	0.000191
0.48	0.000505	0.000183	0.000716	-6.6e-06
0.72	-5.4e-05	-1.6e-05	0.000178	0.000107
0.96	0.000513	-3.8e-05	0.00044	0.000204
1.2	0.000227	-0.00023	0.000395	0.000164
1.44	0.000174	0.00065	0.000364	7e-06
1.68	0.000233	-0.00017	6.23e-05	0.000383
1.92	5.09e-05	-0.00013	-0.00023	0.000293
2.16	0.000231	4.15e-05	0.000121	0.000452
2.4	0.000288	8.27e-05	-0.0001	-0.00022
2.64	0.000182	-0.00017	0.000184	0.000118
2.88	0.000173	6.79e-05	0.000324	0.000352
3.12	0.00014	-0.00021	0.000352	0.000275
3.36	-1e-05	4e-05	0.000317	0.000337
3.6	0.000459	6.8e-05	1.73e-05	8.68e-05
3.84	3.95e-05	4.13e-05	0.000254	-8.1e-06
4.08	0.000135	5.02e-05	-0.00054	0.000186
4.32	5.18e-05	0.000114	0.00024	1.87e-05
4.56	0.000149	0.000198	-3.2e-05	7.74e-05
4.8	-3.9e-05	-7.1e-05	-6.9e-05	0.000195
5.04	9.19e-05	0.000298	-0.00046	0.00013
5.28	0.000191	5.76e-05	0.000232	0.000138
5.52	-6.7e-05	0.000159	-9.4e-05	-6.8e-06
5.76	0.000204	-9.4e-05	7.33e-05	0.000154
6	-3.8e-05	-0.0002	0.000231	-0.00015
6.24	2.81e-05	0.000115	0.000594	-8.9e-06
6.48	0.000269	0.000106	-0.00018	0.000525
6.72	0.000265	0.000285	0.00012	0.000255
6.96	0.000528	5.9e-05	-0.00027	0.000256
7.2	-2.3e-05	-0.00012	0.00012	7.4e-05
7.44	8.51e-05	-7.4e-05	0.000132	3e-05
7.68	0.000209	-0.00028	-0.00038	0.000247
7.92	0.000507	-0.00014	0.00021	0.000201
8.16	8.97e-05	2.21e-05	0.000164	0.000167
8.4	-0.00019	0.000325	-0.00021	0.000108
8.64	-0.00019	-0.00016	-9.1e-05	-0.00021
8.88	0.000377	-7.3e-06	0.000199	0.000415
9.12	0.000171	-0.00026	0.000262	0.00024
9.36	-0.00021	-0.00031	-3.5e-05	0.000318
9.6	9.95e-05	0.00047	0.000442	-5.8e-05
9.84	0.000111	4.42e-05	4.03e-05	-0.00012
10.08	-0.00013	0.000307	9.85e-05	0.000195
10.32	0.000109	0.00069	3.89e-05	6.03e-05
10.56	3.67e-05	2.06e-05	0.000105	7.12e-05
10.8	0.000196	-0.0002	-0.00016	9.63e-05
11.04	-6.3e-05	0.000278	0.000316	0.000174
11.28	-0.0001	0.000582	-2.1e-06	-0.00013
11.52	-8.4e-05	0.000102	0.000275	4.43e-05
11.76	5.54e-05	0.00019	0.000271	0.000296
12	5.55e-05	0.000355	-8.6e-05	-0.00016
12.24	5.34e-05	-3.4e-05	0.000433	-0.00013
12.48	-4.5e-05	-0.00013	4.92e-05	-2.5e-05
12.72	0.000123	9.75e-05	-0.00035	-2.2e-05
12.96	-0.00023	-0.00026	0.000519	7.5e-05
13.2	0.000375	0.000232	-5.9e-06	-0.00021
13.44	-0.00017	3.98e-05	-0.00016	-0.00014
13.68	2.34e-05	0.000214	-8.3e-05	-0.00011
13.92	0.000213	-0.00028	0.000476	0.00012
14.16	0.000177	-0.00037	-0.00014	6.51e-05
14.4	-0.00011	-0.00018	4.56e-05	-0.00011
14.64	-3.2e-05	-0.00059	0.000246	-5.2e-05
14.88	-0.00011	3.09e-05	-0.00023	-0.00012
15.12	0.00023	-0.00033	-0.00015	-5.2e-05
15.36	-0.00013	-8e-05	-0.00028	-1.1e-05
15.6	-0.00016	-0.00024	-0.00012	-0.00012
15.84	-0.00013	0.000377	-0.00027	-9.1e-05
16.08	0.000101	-0.00017	-0.00014	9.74e-05
16.32	-0.00016	0.000213	4.62e-05	-4.2e-06
16.56	0.000117	8.42e-05	-0.00033	0.000393
16.8	0.000314	8.72e-06	0.000144	2.38e-05
17.04	0.000394	0.000436	0.000284	6.09e-05
17.28	-4.1e-05	-0.00021	0.000188	2.25e-05
17.52	4.36e-05	7.67e-05	-0.00029	7.4e-05
17.76	-0.00014	-0.00059	0.000689	-8.2e-05
18	-7.2e-05	-0.0004	-0.00033	4.16e-05
18.24	-0.00014	-0.00037	-0.00016	-7.5e-05
18.48	-4.7e-05	9.75e-05	0.000274	-7e-06
18.72	1.35e-05	9.89e-05	0.000185	-0.00012
18.96	-0.00035	-8e-05	-0.00044	-2.8e-05
19.2	-0.00018	-0.00057	-0.00013	-0.00014
19.44	0.000126	-0.00014	-0.00041	-4.4e-05
19.68	0.000365	-0.00016	7.57e-05	-0.00015
19.92	-0.00037	0.000158	0.000286	-9.9e-05
20.16	-0.00024	-0.00034	0.000351	-0.0002
20.4	-0.00017	-5.3e-05	2.98e-05	3.19e-06
20.64	-8.8e-05	7.08e-05	0.000511	-0.00022
20.88	-8.8e-05	-0.00032	-0.00026	4.97e-05
21.12	-0.00042	-0.0002	-7.7e-05	-4.9e-05
21.36	-3.5e-05	0.000225	1.77e-05	-0.00028
21.6	-0.00018	-0.00032	0.000129	-4e-05
21.84	-0.00035	-0.00035	-0.00018	-1.4e-05
22.08	-6e-05	-0.0002	-0.00044	-0.00025
22.32	-0.00035	-0.0002	-8.5e-05	-1.7e-05
22.56	-4.5e-05	0.000103	-0.00017	-0.00012
22.8	-0.00024	-0.0001	-0.00025	-0.00014
23.04	-0.00026	-5.4e-05	-0.00021	7.85e-05
23.28	7.37e-05	0.000222	-2.6e-05	-1.1e-05
23.52	-0.00024	-0.00047	-0.00042	-0.00021
23.76	-3.8e-05	0.000467	-0.00039	-0.00016
24	-0.00022	0.000167	-0.00048	-0.00011
24.24	0.000129	0.000229	-7.9e-05	-0.00023
24.48	0.00015	0.000209	-0.00045	2.25e-05
24.72	-7.8e-05	0.000511	-0.00015	-0.00038
24.96	-0.00031	-0.00053	0.000327	-6.2e-05
25.2	-6.2e-06	-0.00022	-0.00078	-3.1e-05
25.44	-3.5e-05	-1.4e-05	-0.00013	-0.0002
25.68	2.81e-05	0.00014	-0.00042	-0.00014
25.92	-2.7e-05	0.000247	-0.00016	-2.4e-06
26.16	-9.2e-05	5.45e-05	-0.00012	-0.00023
26.4	-0.00034	-0.00016	-0.00015	-0.00024
26.64	-0.0001	-6.3e-06	-0.00029	-0.00026
26.88	-0.00033	0.000322	-8.1e-05	-0.00017
27.12	-0.00033	0.000105	-0.00027	-0.00051
27.36	-0.00021	-0.0003	0.000232	-0.00019
27.6	1.21e-05	6.19e-05	0.000161	-0.00024
27.84	-0.00015	-0.00034	-1.3e-05	1.02e-05
28.08	-0.00038	0.00017	-0.00063	-0.00019
28.32	-0.00034	0.000515	8.71e-06	-0.00017
28.56	-0.00022	0.000154	-0.00035	-0.00014
28.8	-1.4e-05	-0.00015	-0.00015	-0.00027
29.04	-0.00022	-0.00015	-4e-05	-0.00043
29.28	-0.00015	0.000276	-2.6e-05	0.000145
29.52	-0.0003	0.000307	8.85e-05	-0.00028
29.76	-0.00033	-0.00039	6.32e-05	-0.00023
30	-0.00023	-0.00018	-0.00045	0.000159
30.24	-7.1e-05	-4.9e-05	-0.00038	2.38e-05
30.48	-0.00017	-0.00028	-0.00061	-6.7e-05
30.72	-0.01051	-0.01164	-0.01281	-0.00983
30.96	0.040945	-0.07889	-0.07809	0.041821
31.2	-0.06108	-0.0624	-0.06632	-0.05809
31.44	0.136013	0.126765	0.132298	0.130938
31.68	0.015933*	0.014066*	0.015236*	0.015276*
31.92	-5.8e-05	-0.00042	-0.0006	-9.8e-05
32.16	-0.00046	-0.00045	-0.00046	-0.00028
32.4	-0.00011	0.000105	-0.00121	-9.7e-05
32.64	-3.9e-05	0.000294	-0.00084	-0.00055
32.88	-0.00033	0.000156	-0.00032	-0.00021
33.12	2.64e-05	-0.00016	-0.00044	-9e-05
33.36	-0.00016	-0.00019	-0.00031	-0.00014
33.6	0.000253	0.000184	-0.00072	-0.0003
33.84	-1.7e-05	-0.00051	-0.00083	-6.7e-05
34.08	9.03e-05	-0.00032	-0.00061	-2e-05
34.32	0.000112	-0.00056	-0.00054	9.07e-05
34.56	-0.00011	-0.00027	-0.00095	-0.00036
34.8	-0.00022	-0.00047	-0.0007	-0.00059
35.04	3.69e-05	-0.00024	-0.00059	-0.00023
35.28	-0.00043	-0.00012	-0.0004	-0.00021
35.52	-0.00013	-0.00024	-0.00053	-0.00043
35.76	-1.8e-05	-0.00056	-0.00026	-0.00042
36	-0.00034	0.000223	-0.00067	-0.00013
36.24	-0.00023	-9e-06	-0.00085	-0.00015
36.48	-0.00015	-6.3e-05	-0.00063	-0.00014
36.72	-0.00014	9.9e-05	-0.0004	-0.00044
36.96	-0.00022	-0.00045	-0.00069	-0.00043
37.2	7.26e-05	-4.7e-05	-0.00115	-1.8e-05
37.44	-0.00015	0.000233	-0.00071	-0.00028
37.68	-0.00014	-0.00035	-0.00077	-0.00056
37.92	-0.00016	0.000108	-0.00045	-0.00025
38.16	-0.00042	0.000108	-0.00077	-0.00024
38.4	-0.00019	0.000101	-0.00059	-0.00044
38.64	-9.4e-05	-0.00025	-0.00028	-0.00011
38.88	-9.1e-05	-0.00032	-0.00084	-0.00017
39.12	-0.00022	-0.00025	-0.00043	-0.00027
39.36	-0.0002	-0.00012	-0.00068	-0.00024
39.6	-0.00028	-0.00013	-0.00038	-0.00051
39.84	-6.6e-05	-0.00025	-0.00123	-0.0003
40.08	-0.00019	-6.3e-05	-0.00078	-0.00024
40.32	-0.00038	-6.9e-05	-0.00073	-0.00052
40.56	-0.00026	-0.00032	-0.00036	-0.0004
40.8	-0.00052	-0.00014	-0.001	-0.00031
41.04	-4.6e-05	-0.00093	-0.00088	-0.00024
41.28	-0.00031	-0.00045	-0.00093	-0.00048
41.52	-0.00026	0.000125	-0.00055	-0.00027
41.76	-0.00023	-0.00029	-0.00056	-0.00038
42	-0.00015	-0.00027	-0.00066	-0.00024
42.24	-0.00021	0.000185	-0.00083	-0.0005
42.48	-0.00026	-0.00046	-0.00017	-0.00028
42.72	-0.00028	-0.00034	-0.00055	-0.00054
42.96	-9.2e-05	8.85e-05	-0.00054	-0.00027
43.2	-0.00027	-0.00046	-0.0008	-0.00055
43.44	-0.00031	-0.00046	-0.00075	-0.0002
43.68	-0.00031	-0.00023	-0.00038	-0.00035
43.92	-0.00027	-0.00047	-0.00091	-0.00032
44.16	-0.00015	-8e-05	-0.00072	-0.00028
44.4	-0.00048	0.000171	-0.00082	-0.00035
44.64	-0.00058	-6.8e-05	-0.0011	-0.00025
44.88	-0.00039	0.00014	-0.00105	-0.00059
45.12	-0.00016	0.000212	-0.00045	-0.00045
45.36	-0.00045	-0.00036	-0.00072	-0.00032
45.6	-0.0001	-1.6e-06	-0.00095	-0.00049
45.84	-0.00049	-0.00012	-0.00037	-0.00016
46.08	-0.00021	-0.00048	-0.00054	-0.00036
46.32	-0.00055	-0.00024	-0.00058	-0.00035
46.56	-0.00047	1.49e-05	-0.00084	-0.00027
46.8	-0.00025	-0.00042	-0.00075	-0.0005
47.04	-0.00034	-3.3e-05	-0.00078	-0.0006
47.28	-7.5e-05	-0.00049	-0.00053	-0.0006
47.52	-0.00032	-0.00028	-0.00115	-0.0004
47.76	-0.00025	-0.00021	-0.00065	-0.00058
48	-0.00013	-0.00036	-0.00089	-0.00041
48.24	-9.2e-05	-0.00024	-0.00101	-0.00045
48.48	-0.00036	-0.00015	-0.00089	-0.0006
48.72	-0.00033	-0.00028	-0.0013	-0.00055
48.96	-0.00014	0.000168	-0.00083	-0.00049
49.2	-0.00035	-0.0002	-0.00105	-0.00018
49.44	-0.0001	-0.00044	-0.00097	-0.00049
49.68	-0.00027	-0.0007	-0.00052	-0.00048
49.92	-0.00057	-0.00024	-0.00089	-0.00037
50.16	-0.00054	-0.00018	-0.00044	-0.00067
50.4	-0.0003	6.44e-05	-0.00097	-0.00049
50.64	-0.00061	-0.00013	-0.00089	-0.00047
50.88	-0.00052	-0.00043	-0.00098	-0.00052
51.12	8.03e-06	-4.2e-05	-0.00066	-0.00043
51.36	-8.5e-05	-0.00032	-0.00074	-0.00049
51.6	-0.00032	-0.00059	-0.00077	-0.00056
51.84	-0.00045	-0.00018	-0.00082	-0.00073
52.08	-0.00017	-0.00038	-0.00069	-0.00054
52.32	-0.0001	-0.00039	-0.00094	-0.00082
52.56	-0.0006	-0.00032	-0.00033	-0.00048
52.8	-0.00052	-0.00066	-0.00059	-0.00061
53.04	-0.00032	-0.00066	-0.00049	-0.00089
53.28	-0.00035	-2.9e-05	-0.00051	-0.00074
53.52	-0.00041	0.000333	-0.00048	-0.00077
53.76	-0.00043	8.68e-06	-0.00102	-0.00051
54	-0.00021	-0.00078	-0.00068	-0.00044
54.24	-0.00041	-0.00042	-0.00068	-0.00044
54.48	-0.00057	-0.00026	-0.00108	-0.00069
54.72	-0.00038	-0.00057	-0.00099	-0.00044
54.96	-0.00019	-0.00047	-0.00045	-0.0005
55.2	-0.00052	-0.00024	-0.00119	-0.00061
55.44	-0.00026	-0.00081	-0.00061	-0.00046
55.68	-0.00064	-0.00049	-0.00089	-0.00082
55.92	-0.00056	-0.00024	-0.00099	-0.00037
56.16	-0.00057	2.82e-05	-0.00093	-0.00088
56.4	-0.00052	-5.6e-05	-0.00087	-0.0004
56.64	-0.00057	-1.1e-05	-0.00102	-0.00049
56.88	-0.00038	-0.00013	-0.0004	-0.00047
57.12	-0.00045	-0.00073	-0.00078	-0.00076
57.36	-0.00051	-0.00071	-0.00105	-0.00057
57.6	-0.00051	-0.00057	-0.00114	-0.00059
57.84	-0.00069	-0.00047	-0.0014	-0.00046
58.08	-0.00039	-0.00035	-0.0004	-0.00052
58.32	-0.00022	-0.00034	-0.00102	-0.00077
58.56	-0.00028	-0.00031	-0.00106	-0.00058
58.8	-0.00024	-0.00068	-0.00155	-0.00069
59.04	-0.00043	-0.00031	-0.00108	-0.0004
59.28	-0.00046	-0.00023	-0.00061	-0.0005
59.52	-0.00055	-0.00021	-0.00074	-0.00085
59.76	-0.00061	-0.00027	-0.0004	-0.00052
60	-0.00061	-0.0002	-0.00136	-0.00029
60.24	-0.00046	-0.00081	-0.00101	-0.00066
60.48	-0.00035	-0.00049	-0.00063	-0.0007
60.72	-0.00072	-0.0002	-0.0008	-0.00055
60.96	-0.00049	-0.00052	-0.00055	-0.00087
61.2	-0.00073	-0.00036	-0.00123	-0.00063
61.44	-0.00046	-0.0008	-0.00126	-0.00053
61.68	-0.0006	-0.00093	-0.00111	-0.00093
61.92	-0.00044	-0.00024	-0.0007	-0.00075
62.16	-0.00069	-0.00072	-0.0011	-0.00073
62.4	-0.00049	-0.00082	-0.00091	-0.00064
62.64	-0.00071	-0.00015	-0.00093	-0.00079
62.88	-0.00044	-0.00062	-0.00104	-0.00071
63.12	-0.00066	-0.00033	-0.00088	-0.00081
63.36	-0.00061	-0.00051	-0.00093	-0.00075
63.6	-0.00053	-0.0002	-0.00095	-0.00083
63.84	-0.00052	-0.00061	-0.0003	-0.00075
64.08	-0.00067	-0.00052	-0.00084	-0.00074
64.32	-0.00056	-0.00031	-0.00097	-0.0006
64.56	-0.00053	-0.00085	-0.00107	-0.00073
64.8	-0.00057	-7e-05	-0.00049	-0.0009
65.04	-0.00077	-0.00028	-0.00105	-0.00073
65.28	-0.00037	-0.00057	-0.00112	-0.0005
65.52	-0.00074	-0.00011	-0.00081	-0.00067
65.76	-0.00074	-0.00057	-0.00144	-0.00088
66	-0.00053	-0.00055	-0.00125	-0.00084
66.24	-0.00048	-0.00028	-0.00129	-0.00084
66.48	-0.00066	-0.00058	-0.00107	-0.00063
66.72	-0.00069	-0.00025	-0.00095	-0.00106
66.96	-0.00055	-0.00081	-0.00118	-0.00095
67.2	-0.00061	-0.00066	-0.00082	-0.001
67.44	-0.00053	-0.00043	-0.00068	-0.00064
67.68	-0.00067	-0.00074	-0.00115	-0.00094
67.92	-0.0006	-0.00081	-0.00113	-0.00089
68.16	-0.00056	-0.00063	-0.0014	-0.00084
68.4	-0.00086	-0.00038	-0.00079	-0.00071
68.64	-0.00036	-0.00033	-0.0009	-0.00071
68.88	-0.00044	-0.00025	-0.00044	-0.00091
69.12	-0.00068	-0.00064	-0.00098	-0.0009
69.36	-0.00034	-0.00077	-0.00148	-0.00081
69.6	-0.00049	-0.00087	-0.001	-0.00074
69.84	-0.00039	-0.00022	-0.00052	-0.00089
70.08	-0.00076	-2.9e-05	-0.00107	-0.00094
70.32	-0.00071	-0.00047	-0.00118	-0.00109
70.56	-0.00061	-0.00078	-0.0015	-0.00076
70.8	-0.00094	-0.00012	-0.00098	-0.00088
71.04	-0.00054	-0.00091	-0.00082	-0.00057
71.28	-0.00112	-0.0009	-0.00109	-0.00071
71.52	-0.00076	-0.00029	-0.00122	-0.00096
71.76	-0.0011	-0.0004	-0.00119	-0.00064
72	-0.00039	-0.00108	-0.00111	-0.00062
72.24	-0.00069	-0.00073	-0.00087	-0.00097
72.48	-0.00084	-0.00035	-0.00111	-0.00081
72.72	-0.00109	-0.00119	-0.00124	-0.00066
72.96	-0.0009	-0.00072	-0.00172	-0.00083
73.2	-0.00051	-0.00041	-0.00141	-0.00081
73.44	-0.00064	-0.00107	-0.00138	-0.00097
73.68	-0.00097	-0.00029	-0.00043	-0.00092
73.92	-0.00055	-0.00031	-0.00116	-0.0009
74.16	-0.00064	-0.00054	-0.00123	-0.00059
74.4	-0.00059	-0.00096	-0.00116	-0.00075
74.64	-0.0008	-0.00073	-0.0009	-0.00103
74.88	-0.00063	-0.00069	-0.00127	-0.00095
75.12	-0.0007	-0.00036	-0.00107	-0.00099
75.36	-0.00059	-0.00056	-0.00133	-0.00092
75.6	-0.00089	-0.00029	-0.00121	-0.00102
75.84	-0.00068	-0.00074	-0.00076	-0.00068
76.08	-0.00071	-0.00027	-0.0012	-0.00098
76.32	-0.0006	-0.00085	-0.00091	-0.00101
76.56	-0.00095	-0.00092	-0.00151	-0.00117
76.8	-0.00061	-0.00057	-0.00111	-0.00093
77.04	-0.00101	-0.00073	-0.00151	-0.00099
77.28	-0.00078	-0.00088	-0.00093	-0.00107
77.52	-0.00077	-0.00081	-0.00122	-0.00099
77.76	-0.00079	-0.00036	-0.00166	-0.00096
78	-0.00076	-0.00077	-0.00101	-0.0008
78.24	-0.00095	-0.00082	-0.00095	-0.00079
78.48	-0.00058	-0.00124	-0.00153	-0.00099
78.72	-0.0007	-0.00083	-0.00109	-0.00096
78.96	-0.00093	-0.00043	-0.00113	-0.00085
79.2	-0.00088	-0.00077	-0.00088	-0.00058
79.44	-0.00056	-0.00084	-0.00109	-0.0011
79.68	-0.00078	-0.0004	-0.00132	-0.00081
79.92	-0.00078	-0.00055	-0.00118	-0.00071
80.16	-0.00079	-0.00071	-0.00122	-0.00087
80.4	-0.00077	-0.00083	-0.00082	-0.00112
80.64	-0.00063	-0.00045	-0.00108	-0.00104
80.88	-0.00082	-0.00027	-0.00103	-0.00107
81.12	-0.00056	-0.00088	-0.00132	-0.0008
81.36	-0.00073	-0.00052	-0.00108	-0.00089
81.6	-0.00094	-0.00071	-0.00181	-0.00081
81.84	-0.00068	-0.00034	-0.00148	-0.00109
82.08	-0.00086	-0.00057	-0.00138	-0.00106
82.32	-0.00083	-0.0003	-0.00159	-0.00076
82.56	-0.00095	-0.00058	-0.00093	-0.00091
82.8	-0.00062	-0.00071	-0.00094	-0.00094
83.04	-0.00077	-0.00049	-0.0012	-0.0011
83.28	-0.00075	-0.00055	-0.00118	-0.00092
83.52	-0.00072	-0.00047	-0.0008	-0.00081
83.76	-0.00061	-0.00043	-0.00151	-0.00087
84	-0.00083	-0.00077	-0.00134	-0.00108
84.24	-0.0007	-0.00055	-0.0011	-0.00094
84.48	-0.00098	-0.0011	-0.00161	-0.00095
84.72	-0.00088	-0.00077	-0.00103	-0.00108
84.96	-0.00096	-0.00058	-0.00099	-0.00098
85.2	-0.00077	-0.00122	-0.00151	-0.00097
85.44	-0.0008	-0.0006	-0.0014	-0.0009
85.68	-0.00091	-0.00039	-0.00184	-0.00093
85.92	-0.00082	-0.00107	-0.00125	-0.00109
86.16	-0.00065	-0.00081	-0.00086	-0.00105
86.4	-0.00094	-0.0008	-0.0014	-0.001
86.64	-0.00085	-0.00088	-0.0013	-0.00091
86.88	-0.0008	-0.00034	-0.00127	-0.00099
87.12	-0.00082	-0.00108	-0.00155	-0.0007
87.36	-0.00081	-0.00079	-0.00138	-0.00094
87.6	-0.00084	-0.00039	-0.00103	-0.00088
87.84	-0.00092	-0.00058	-0.00119	-0.00105
88.08	-0.00078	-0.00023	-0.00167	-0.00111
88.32	-0.00103	-0.00091	-0.00153	-0.00106
88.56	-0.00081	-0.0006	-0.00162	-0.0011
88.8	-0.00101	-0.00055	-0.00097	-0.00107
89.04	-0.0011	-0.00063	-0.00129	-0.001
89.28	-0.00086	-0.00058	-0.00127	-0.00103
89.52	-0.00088	-0.00046	-0.00133	-0.00104
89.76	-0.00096	-0.0011	-0.00115	-0.00083
90	-0.00098	-0.00041	-0.00163	-0.00097
90.24	-0.00092	-0.00113	-0.00144	-0.00121
90.48	-0.00079	-0.00027	-0.00152	-0.0011
90.72	-0.00086	-0.00076	-0.001	-0.00109
90.96	-0.00105	-0.0004	-0.00127	-0.00105
91.2	-0.00077	-0.00015	-0.00111	-0.00113
91.44	-0.00105	-0.00142	-0.00195	-0.00108
91.68	-0.00094	-5.6e-05	-0.00142	-0.00113
91.92	-0.00087	-0.00081	-0.00185	-0.00126
92.16	-0.001	-0.00092	-0.0011	-0.00111
92.4	-0.00088	-0.00056	-0.00105	-0.00126
92.64	-0.00082	-0.00058	-0.00112	-0.00114
92.88	-0.00077	-0.00056	-0.00142	-0.00128
93.12	-0.00082	-0.00086	-0.00157	-0.00116
93.36	-0.00067	-0.0002	-0.00101	-0.00124
93.6	-0.00094	-0.00095	-0.00128	-0.00143
93.84	-0.00087	-0.00068	-0.00134	-0.00116
94.08	-0.00111	-0.00099	-0.00203	-0.00098
94.32	-0.00094	-0.00117	-0.00171	-0.00114
94.56	-0.00106	-0.00093	-0.00196	-0.00127
94.8	-0.00085	-0.00063	-0.00133	-0.00114
95.04	-0.00096	-0.00088	-0.00117	-0.0011
95.28	-0.00101	-0.00078	-0.00121	-0.00108
95.52	-0.00124	-0.00082	-0.00147	-0.00126
95.76	-0.00082	-0.00075	-0.00182	-0.00091
96	-0.00059	-0.00036	-0.00115	-0.00121
96.24	-0.00093	-0.0006	-0.00175	-0.00134
96.48	-0.00075	-0.00077	-0.00177	-0.00119
96.72	-0.00094	-0.00036	-0.00111	-0.00115
96.96	-0.00124	-0.00055	-0.00169	-0.00096
97.2	-0.00121	-0.00071	-0.00141	-0.00117
97.44	-0.00079	-0.00084	-0.00087	-0.00131
97.68	-0.00094	-0.00069	-0.00171	-0.00127
97.92	-0.00119	-0.00103	-0.00128	-0.00092
98.16	-0.00091	-0.00041	-0.00142	-0.0012
98.4	-0.0012	-0.0008	-0.00143	-0.00089
98.64	-0.00079	-0.00061	-0.00126	-0.00109
98.88	-0.00129	-0.00057	-0.00157	-0.00117
99.12	-0.00104	-0.00064	-0.00104	-0.0011
99.36	-0.00118	-0.0008	-0.00129	-0.00125
99.6	-0.00072	-0.00077	-0.00164	-0.00116
99.84	-0.00111	-0.00081	-0.00223	-0.00127
100.08	-0.00088	-0.00062	-0.00122	-0.00099
100.32	-0.001	-0.00047	-0.00151	-0.00138
100.56	-0.00096	-0.00086	-0.00152	-0.00119
100.8	-0.00129	-0.00102	-0.00115	-0.00135
101.04	-0.001	-0.00033	-0.00182	-0.0012
101.28	-0.00103	-0.00126	-0.00167	-0.00107
101.52	-0.00097	-0.00087	-0.00146	-0.00129
101.76	-0.00114	-0.00072	-0.00177	-0.00117
102	-0.00093	-0.00042	-0.00207	-0.00146
102.24	-0.00113	-0.00067	-0.00139	-0.00133
102.48	-0.00125	-0.00047	-0.00156	-0.00118
102.72	-0.00119	-0.0008	-0.00112	-0.00125
102.96	-0.00115	-0.00103	-0.0015	-0.00107
103.2	-0.0012	-0.00079	-0.00111	-0.00113
103.44	-0.00126	-0.00094	-0.00161	-0.00114
103.68	-0.00103	-0.00079	-0.00249	-0.00111
103.92	-0.00131	-0.0005	-0.00154	-0.00099
104.16	-0.00132	-0.00073	-0.00145	-0.00113
104.4	-0.00114	-0.00038	-0.00151	-0.00125
104.64	-0.00143	-0.00039	-0.00179	-0.00119
104.88	-0.00097	-0.00082	-0.00166	-0.00118
105.12	-0.00116	-0.00085	-0.00127	-0.00141
105.36	-0.00131	-0.00065	-0.00134	-0.00134
105.6	-0.00087	-0.00114	-0.00164	-0.00158
105.84	-0.00128	-0.00098	-0.00115	-0.00106
106.08	-0.00085	-2.7e-05	-0.0016	-0.00131
106.32	-0.00105	-0.00041	-0.00135	-0.00124
106.56	-0.00093	-0.00081	-0.00142	-0.00141
106.8	-0.00084	-0.00086	-0.0016	-0.00131
107.04	-0.00102	-0.00064	-0.00104	-0.00126
107.28	-0.00141	-0.00017	-0.00137	-0.00113
107.52	-0.00113	-0.00061	-0.00117	-0.00152
107.76	-0.00102	-0.0005	-0.00114	-0.00125
108	-0.00104	-0.00094	-0.00151	-0.00123
108.24	-0.00121	-0.00074	-0.00172	-0.00135
108.48	-0.00094	-0.00073	-0.00184	-0.00126
108.72	-0.00114	-0.001	-0.00156	-0.00121
108.96	-0.00095	-0.00098	-0.00178	-0.00144
109.2	-0.00115	-0.00097	-0.00183	-0.00131
109.44	-0.00108	-0.00087	-0.0016	-0.00107
109.68	-0.00087	-0.00053	-0.00124	-0.00136
109.92	-0.00079	-0.0006	-0.00128	-0.0016
110.16	-0.00078	-0.00061	-0.00162	-0.0016
110.4	-0.00123	-0.00067	-0.00142	-0.00127
110.64	-0.0009	-0.00102	-0.00154	-0.0012
110.88	-0.00107	-0.00119	-0.00124	-0.00131
111.12	-0.00087	-0.00093	-0.00148	-0.0013
111.36	-0.00111	-0.00054	-0.00149	-0.00141
111.6	-0.00129	-0.00047	-0.00183	-0.00124
111.84	-0.00108	-0.00064	-0.00201	-0.00113
112.08	-0.00101	-0.00128	-0.00125	-0.00151
112.32	-0.0014	-0.00097	-0.00148	-0.00136
112.56	-0.00101	-0.00072	-0.00196	-0.00127
112.8	-0.00143	-0.00115	-0.0018	-0.00124
113.04	-0.00109	-0.0009	-0.00146	-0.00141
113.28	-0.00129	-0.00131	-0.00161	-0.00115
113.52	-0.001	-0.00062	-0.00169	-0.00125
113.76	-0.00135	-0.00079	-0.00206	-0.00132
114	-0.00135	-0.00076	-0.00149	-0.00132
114.24	-0.00104	-0.00097	-0.00195	-0.00126
114.48	-0.00143	-0.00113	-0.00194	-0.00114
114.72	-0.00131	-0.00051	-0.00094	-0.00135
114.96	-0.00112	-0.00058	-0.00179	-0.00104
115.2	-0.00129	-0.00076	-0.00178	-0.00104
115.44	-0.00142	-0.00095	-0.00123	-0.00147
115.68	-0.00112	-0.00083	-0.00163	-0.00127
115.92	-0.00085	-0.00082	-0.00154	-0.00115
116.16	-0.00135	-0.00094	-0.00146	-0.00142
116.4	-0.00119	-0.00098	-0.00157	-0.00155
116.64	-0.0012	-0.00061	-0.0019	-0.00121
116.88	-0.0011	-0.00083	-0.00094	-0.00128
117.12	-0.00109	-0.00086	-0.00171	-0.0014
117.36	-0.0013	-0.00057	-0.00131	-0.00113
117.6	-0.00133	-0.00048	-0.00137	-0.00132
117.84	-0.00108	-0.00079	-0.00186	-0.00154
118.08	-0.00143	-0.00076	-0.00166	-0.00149
118.32	-0.00123	-0.00092	-0.00197	-0.00123
118.56	-0.00101	-0.00093	-0.0021	-0.00117
118.8	-0.00116	-0.00046	-0.00121	-0.00137
119.04	-0.00155	-0.0004	-0.00169	-0.00143
119.28	-0.00144	-0.00084	-0.00169	-0.00145
119.52	-0.0016	-0.00067	-0.00121	-0.0015
119.76	-0.00126	-0.00076	-0.00189	-0.00148
120	-0.00106	-0.00079	-0.00164	-0.00139
120.24	-0.00148	-0.00065	-0.00109	-0.00167
120.48	-0.00125	-0.00064	-0.00201	-0.00165
120.72	-0.00109	-0.00079	-0.00185	-0.00132
120.96	-0.00123	-0.00058	-0.00189	-0.00166
121.2	-0.00109	-0.00076	-0.0014	-0.00117
121.44	-0.00133	-0.00102	-0.00128	-0.00165
121.68	-0.00111	-0.00078	-0.00134	-0.00128
121.92	-0.00141	-0.00094	-0.00144	-0.00146
122.16	-0.00155	-0.00127	-0.00165	-0.00144
122.4	-0.00124	-0.00111	-0.00162	-0.00152
122.64	-0.00103	-0.00063	-0.00156	-0.00165
122.88	-0.00134	-0.00115	-0.00159	-0.00135
123.12	-0.00136	-0.00111	-0.00117	-0.0016
123.36	-0.00142	-0.00032	-0.00192	-0.00151
123.6	-0.00146	-0.00101	-0.00199	-0.00145
123.84	-0.00137	-0.00045	-0.00158	-0.00141
124.08	-0.0014	-0.00096	-0.00168	-0.00161
124.32	-0.00126	-0.00174	-0.00204	-0.00153
124.56	-0.0012	-0.00074	-0.00189	-0.00154
124.8	-0.00134	-0.00043	-0.00196	-0.00149
125.04	-0.00126	-0.00098	-0.00173	-0.00148
125.28	-0.00109	-0.00088	-0.00156	-0.0016
125.52	-0.00113	-0.00079	-0.00176	-0.00133
125.76	-0.00132	-0.00103	-0.00135	-0.00139
126	-0.00136	-0.00078	-0.00197	-0.0016
126.24	-0.00148	-0.00106	-0.00166	-0.00143
126.48	-0.00127	-0.00083	-0.00207	-0.00172
126.72	-0.00168	-0.00059	-0.00193	-0.00167
126.96	-0.00102	-0.00091	-0.0015	-0.00167
127.2	-0.00151	-0.00096	-0.00166	-0.00143
127.44	-0.00117	-0.00097	-0.00183	-0.00123
127.68	-0.00092	-0.00074	-0.00134	-0.00147
127.92	-0.00126	-0.00083	-0.00196	-0.00164
128.16	-0.00141	-0.00094	-0.00119	-0.00118
128.4	-0.00135	-0.00015	-0.00165	-0.00148
128.64	-0.00121	-0.00082	-0.00157	-0.00156
128.88	-0.00139	-0.00086	-0.00173	-0.0015
129.12	-0.00117	-0.00126	-0.00185	-0.00153
129.36	-0.00127	-0.0008	-0.00187	-0.00169
129.6	-0.00132	-0.00076	-0.00148	-0.00147
129.84	-0.00172	-0.00052	-0.00171	-0.00153
130.08	-0.00133	-0.00081	-0.00176	-0.00139
130.32	-0.00138	-0.00108	-0.00194	-0.00149
130.56	-0.00138	-0.00089	-0.00148	-0.00152
130.8	-0.00154	-0.00103	-0.00221	-0.00162
131.04	-0.00114	-0.00093	-0.00151	-0.00164
131.28	-0.0014	-0.0013	-0.00137	-0.00165
131.52	-0.00135	-0.00085	-0.00204	-0.00156
131.76	-0.00123	-0.00146	-0.00159	-0.00156
132	-0.00166	-0.00135	-0.00171	-0.00163
132.24	-0.00143	-0.00087	-0.00169	-0.00158
132.48	-0.00125	-0.00095	-0.00226	-0.00145
132.72	-0.0013	-0.00092	-0.00163	-0.00149
132.96	-0.00154	-0.00099	-0.00176	-0.00159
133.2	-0.00117	-0.00086	-0.00191	-0.00163
133.44	-0.0015	-0.00071	-0.00172	-0.00177
133.68	-0.00129	-0.00098	-0.00177	-0.00176
133.92	-0.00113	-0.00127	-0.00181	-0.00163
134.16	-0.00146	-0.00102	-0.00177	-0.00174
134.4	-0.00118	-0.00063	-0.00227	-0.00174
134.64	-0.00134	-0.00085	-0.00161	-0.00149
134.88	-0.00147	-0.00094	-0.00186	-0.00177
135.12	-0.00141	-0.00055	-0.00168	-0.0015
135.36	-0.00129	-0.00093	-0.00226	-0.00183
135.6	-0.00157	-0.00076	-0.00174	-0.00159
135.84	-0.00161	-0.00082	-0.0013	-0.00184
136.08	-0.00134	-0.00129	-0.00141	-0.00179
136.32	-0.00163	-0.00133	-0.00177	-0.00184
136.56	-0.00136	-0.00149	-0.00172	-0.00152
136.8	-0.00136	-0.00035	-0.00189	-0.00146
137.04	-0.00155	-0.00118	-0.00219	-0.00149
137.28	-0.00163	-0.00054	-0.00181	-0.00148
137.52	-0.00166	-0.00083	-0.00192	-0.00152
137.76	-0.00144	-0.00107	-0.00187	-0.00171
138	-0.00152	-0.00099	-0.00183	-0.00162
138.24	-0.00156	-0.00091	-0.00185	-0.00143
138.48	-0.00169	-0.00102	-0.00157	-0.00167
138.72	-0.0012	-0.00086	-0.00185	-0.00162
138.96	-0.00138	-0.00161	-0.00155	-0.00156
139.2	-0.00106	-0.00129	-0.00202	-0.00181
139.44	-0.00126	-0.00138	-0.00195	-0.00155
139.68	-0.00152	-0.00099	-0.00158	-0.00165
139.92	-0.00132	-0.00108	-0.00203	-0.0015
140.16	-0.00134	-0.00089	-0.00197	-0.0018
140.4	-0.00153	-0.00075	-0.00189	-0.00171
140.64	-0.00164	-0.00112	-0.0017	-0.00204
140.88	-0.00146	-0.00068	-0.00167	-0.00179
141.12	-0.00122	-0.00084	-0.00162	-0.00156
141.36	-0.00178	-0.00119	-0.00165	-0.0017
141.6	-0.00139	-0.00084	-0.00196	-0.00164
141.84	-0.00143	-0.00083	-0.00187	-0.00178
142.08	-0.00165	-0.00118	-0.00175	-0.00181
142.32	-0.00132	-0.00078	-0.00207	-0.00165
142.56	-0.0014	-0.00071	-0.00177	-0.00174
142.8	-0.0016	-0.00086	-0.00149	-0.00161
143.04	-0.00143	-0.00085	-0.00186	-0.00177
143.28	-0.0015	-0.00076	-0.00166	-0.00176
143.52	-0.00172	-0.00116	-0.00166	-0.00183
143.76	-0.00156	-0.00083	-0.00175	-0.00146
144	-0.00159	-0.00084	-0.00155	-0.00172
144.24	-0.0014	-0.00105	-0.00178	-0.00163
144.48	-0.00175	-0.00101	-0.00185	-0.00188
144.72	-0.00153	-0.00078	-0.00164	-0.00153
144.96	-0.00145	-0.00113	-0.00183	-0.00153
145.2	-0.00131	-0.00051	-0.00165	-0.00175
145.44	-0.00152	-0.00127	-0.00171	-0.00197
145.68	-0.0014	-0.00115	-0.00199	-0.00164
145.92	-0.00133	-0.00104	-0.00196	-0.00177
146.16	-0.00166	-0.00087	-0.00206	-0.00163
146.4	-0.00137	-0.0012	-0.00237	-0.00153
146.64	-0.00178	-0.00085	-0.00192	-0.00159
146.88	-0.00138	-0.00087	-0.00138	-0.0017
147.12	-0.0014	-0.00083	-0.00191	-0.00186
147.36	-0.00153	-0.00093	-0.00164	-0.00184
147.6	-0.00161	-0.0006	-0.00185	-0.00162
147.84	-0.0019	-0.00069	-0.00187	-0.00169
148.08	-0.00181	-0.00101	-0.00183	-0.00173
148.32	-0.00162	-0.00065	-0.00211	-0.00177
148.56	-0.00179	-0.0017	-0.00208	-0.00162
148.8	-0.00178	-0.00113	-0.00214	-0.00201
149.04	-0.00156	-0.00143	-0.00185	-0.0016
149.28	-0.00155	-0.00122	-0.0016	-0.00195
149.52	-0.00159	-0.00141	-0.00225	-0.00172
149.76	-0.00154	-0.00068	-0.00172	-0.00186
150	-0.00152	-0.00126	-0.00224	-0.00192
150.24	-0.00155	-0.00112	-0.00146	-0.00148
150.48	-0.00096	-0.00076	-0.00052	-0.00086
150.72	-0.01084	-0.01248	-0.01301	-0.01025
150.96	0.038859	-0.07283	-0.07593	0.04014
151.2	-0.05957	-0.06099	-0.06393	-0.05724
151.44	0.149391	0.135362	0.147492	0.141849
151.68	0.016445	0.015744	0.016816	0.015022
151.92	0.001182	0.001321	0.002007	0.000982
152.16	0.001649	0.00171	0.002122	0.001151
152.4	0.001907	0.002084	0.001942	0.001491
152.64	0.002366	0.002116	0.002864	0.001758
152.88	0.002738	0.002438	0.00359	0.001876
153.12	0.002596	0.003238	0.004055	0.002397
153.36	0.002899	0.003011	0.003525	0.002466
153.6	0.003201	0.003137	0.004296	0.002863
153.84	0.003263	0.003175	0.004555	0.002681
154.08	0.003346	0.003549	0.004782	0.003055
154.32	0.003996	0.003551	0.004088	0.003103
154.56	0.003737	0.003867	0.005154	0.003156
154.8	0.003787	0.004087	0.004901	0.003142
155.04	0.004143	0.003591	0.005432	0.003742
155.28	0.004086	0.004166	0.005948	0.003398
155.52	0.004329	0.004174	0.00517	0.00373
155.76	0.004398	0.005058	0.006061	0.004161
156	0.004926	0.005007	0.006113	0.004047
156.24	0.004837	0.005003	0.005667	0.004146
156.48	0.004812	0.005201	0.005917	0.004185
156.72	0.004931	0.004958	0.005801	0.004521
156.96	0.005276	0.005832	0.00654	0.00457
157.2	0.005113	0.005114	0.006856	0.004646
157.44	0.005484	0.005979	0.006982	0.004662
157.68	0.005172	0.005269	0.006145	0.004783
157.92	0.005323	0.005612	0.006791	0.004735
158.16	0.005425	0.006302	0.006742	0.005009
158.4	0.005617	0.005615	0.007075	0.005315
158.64	0.005525	0.005708	0.006538	0.004998
158.88	0.005435	0.006061	0.007774	0.005138
159.12	0.005684	0.006045	0.007308	0.005215
159.36	0.006125	0.00622	0.006953	0.005292
159.6	0.005548	0.00579	0.007112	0.00546
159.84	0.006328	0.006448	0.007723	0.005236
160.08	0.005904	0.006277	0.007688	0.005483
160.32	0.00608	0.006188	0.007845	0.005835
160.56	0.006078	0.006782	0.007306	0.005639
160.8	0.005827	0.006646	0.007392	0.005923
161.04	0.006325	0.006797	0.007674	0.005894
161.28	0.006404	0.006732	0.007598	0.0058
161.52	0.006457	0.0072	0.00815	0.005644
161.76	0.006284	0.006877	0.007752	0.006208
162	0.00644	0.00713	0.008025	0.00618
162.24	0.00642	0.006364	0.008126	0.005928
162.48	0.006482	0.006928	0.007879	0.005839
162.72	0.006714	0.006758	0.007651	0.005893
162.96	0.00669	0.007085	0.008236	0.006176
163.2	0.006715	0.006801	0.008033	0.006343
163.44	0.006575	0.007142	0.00828	0.006243
163.68	0.006862	0.006948	0.007845	0.006262
163.92	0.006703	0.006917	0.008224	0.006277
164.16	0.006724	0.006806	0.00832	0.00637
164.4	0.006528	0.007123	0.008242	0.006585
164.64	0.006799	0.007065	0.007595	0.006502
164.88	0.006712	0.006867	0.00775	0.006415
165.12	0.006818	0.007529	0.007959	0.006417
165.36	0.006925	0.007856	0.00879	0.006628
165.6	0.006963	0.007289	0.007722	0.006414
165.84	0.006955	0.007648	0.008528	0.006392
166.08	0.006488	0.007655	0.008698	0.006605
166.32	0.007085	0.007549	0.008432	0.006844
166.56	0.006848	0.007481	0.008988	0.006728
166.8	0.006762	0.007812	0.008943	0.006629
167.04	0.007109	0.007789	0.008106	0.00665
167.28	0.007198	0.007554	0.008778	0.006804
167.52	0.007229	0.007029	0.008062	0.006851
167.76	0.007065	0.007424	0.008974	0.006772
168	0.007257	0.007493	0.008101	0.006768
168.24	0.007078	0.007685	0.008534	0.006642
168.48	0.006861	0.00802	0.008432	0.00679
168.72	0.007147	0.007503	0.008627	0.006849
168.96	0.007222	0.007929	0.008961	0.007045
169.2	0.007191	0.008098	0.008103	0.007099
169.44	0.006925	0.007862	0.008967	0.007
169.68	0.006979	0.007729	0.008547	0.006825
169.92	0.006846	0.007996	0.008559	0.007164
170.16	0.007223	0.007946	0.008239	0.00701
170.4	0.007308	0.008303	0.008746	0.006947
170.64	0.006999	0.007776	0.008628	0.006838
170.88	0.007242	0.008116	0.008965	0.007041
171.12	0.007207	0.007989	0.009027	0.00706
171.36	0.007154	0.007982	0.009018	0.007239
171.6	0.007205	0.008142	0.00803	0.007178
171.84	0.007193	0.008333	0.009045	0.007272
172.08	0.007545	0.007961	0.008483	0.007339
172.32	0.007571	0.007711	0.008991	0.007164
172.56	0.007401	0.008336	0.008237	0.00726
172.8	0.006998	0.008487	0.008573	0.007218
173.04	0.007344	0.007769	0.008289	0.007338
173.28	0.007004	0.008358	0.009235	0.007655
173.52	0.007432	0.008494	0.009179	0.007566
173.76	0.007592	0.008268	0.008897	0.007588
174	0.007233	0.008249	0.009207	0.007265
174.24	0.007485	0.008292	0.008076	0.007597
174.48	0.007315	0.008301	0.009435	0.007378
174.72	0.007392	0.008424	0.008564	0.007432
174.96	0.007011	0.008171	0.008716	0.007796
175.2	0.007272	0.008143	0.008163	0.007434
175.44	0.007388	0.00838	0.009004	0.007417
175.68	0.007576	0.008323	0.00923	0.00757
175.92	0.007349	0.008584	0.008774	0.007691
176.16	0.007236	0.008806	0.00902	0.007458
176.4	0.007482	0.008608	0.008961	0.007594
176.64	0.007476	0.008533	0.009069	0.007807
176.88	0.007283	0.008825	0.008636	0.0077
177.12	0.007484	0.00852	0.008703	0.007488
177.36	0.007621	0.008233	0.008585	0.00736
177.6	0.007491	0.008391	0.0086	0.007459
177.84	0.007618	0.008477	0.009609	0.007618
178.08	0.007755	0.008728	0.00896	0.007446
178.32	0.007341	0.008072	0.008893	0.007983
178.56	0.007602	0.008291	0.008784	0.007649
178.8	0.007258	0.008151	0.00935	0.007596
179.04	0.007372	0.008371	0.008559	0.007664
179.28	0.007411	0.008715	0.008906	0.007571
179.52	0.0075	0.00838	0.009314	0.007598
179.76	0.007229	0.008592	0.008674	0.007854
180	0.007351	0.0089	0.008817	0.007923
180.24	0.007419	0.008563	0.008637	0.007922
180.48	0.007222	0.008629	0.008454	0.007885
180.72	0.00721	0.008129	0.008611	0.007794
180.96	0.007214	0.009069	0.009235	0.00766
181.2	0.007399	0.008352	0.009142	0.007723
181.44	0.007417	0.008215	0.009126	0.007886
181.68	0.007422	0.008893	0.008433	0.007843
181.92	0.00771	0.008679	0.008538	0.00787
182.16	0.007566	0.008433	0.00921	0.007935
182.4	0.007685	0.008923	0.009089	0.007858
182.64	0.007351	0.00896	0.009237	0.007839
182.88	0.00759	0.008292	0.008916	0.007668
183.12	0.007687	0.008775	0.008949	0.008061
183.36	0.007791	0.008737	0.00915	0.007616
183.6	0.007324	0.008584	0.00825	0.007796
183.84	0.007429	0.008066	0.009905	0.007917
184.08	0.007481	0.008664	0.008819	0.007738
184.32	0.007472	0.009212	0.00923	0.008061
184.56	0.00763	0.008275	0.00858	0.007799
184.8	0.007386	0.008302	0.009107	0.007858
185.04	0.007594	0.00834	0.008863	0.00795
185.28	0.007422	0.008498	0.00829	0.008183
185.52	0.007004	0.008364	0.009067	0.007755
185.76	0.007571	0.008317	0.008834	0.007807
186	0.007828	0.008341	0.009546	0.008014
186.24	0.007519	0.008381	0.00876	0.008138
186.48	0.007603	0.008858	0.008724	0.007892
186.72	0.007634	0.008428	0.008773	0.007953
186.96	0.007634	0.008878	0.009117	0.007881
187.2	0.007677	0.00826	0.008773	0.00803
187.44	0.007291	0.008818	0.008615	0.007946
187.68	0.007262	0.008833	0.008423	0.008144
187.92	0.007232	0.008492	0.008884	0.008066
188.16	0.00725	0.00899	0.009088	0.007815
188.4	0.007535	0.008612	0.00888	0.007687
188.64	0.007237	0.008763	0.009212	0.007852
188.88	0.007613	0.009042	0.009126	0.008079
189.12	0.007128	0.008723	0.008642	0.008303
189.36	0.007316	0.008437	0.008764	0.008078
189.6	0.007583	0.008638	0.008519	0.008147
189.84	0.007538	0.008868	0.008884	0.007977
190.08	0.007465	0.008842	0.00863	0.008078
190.32	0.007617	0.008638	0.008321	0.008206
190.56	0.007346	0.008749	0.009136	0.008085
190.8	0.007146	0.008957	0.009471	0.00829
191.04	0.007735	0.008824	0.00874	0.00838
191.28	0.007555	0.008188	0.008625	0.008149
191.52	0.007398	0.008951	0.008752	0.008325
191.76	0.007392	0.008647	0.008907	0.008128
192	0.00722	0.008814	0.008991	0.008248
192.24	0.007411	0.008629	0.008593	0.008042
192.48	0.007639	0.008578	0.009039	0.008205
192.72	0.0075	0.008559	0.008661	0.008277
192.96	0.007145	0.008695	0.009159	0.008272
193.2	0.007495	0.008431	0.008733	0.008183
193.44	0.007155	0.008766	0.008614	0.008058
193.68	0.00754	0.008997	0.008813	0.007965
193.92	0.007371	0.009246	0.008494	0.00848
194.16	0.007383	0.008592	0.008993	0.008412
194.4	0.007287	0.008969	0.00869	0.008335
194.64	0.007403	0.008767	0.008752	0.007973
194.88	0.007011	0.008599	0.009293	0.00819
195.12	0.007508	0.008374	0.008455	0.008127
195.36	0.007306	0.008465	0.008409	0.008037
195.6	0.007493	0.008422	0.009187	0.008094
195.84	0.007256	0.00887	0.008455	0.008385
196.08	0.007336	0.0089	0.009119	0.008128
196.32	0.007337	0.00777	0.008491	0.008319
196.56	0.007491	0.008674	0.00858	0.008175
196.8	0.007137	0.008549	0.008759	0.008282
197.04	0.007481	0.008221	0.008673	0.008234
197.28	0.007395	0.008884	0.009262	0.008446
197.52	0.00755	0.008112	0.008805	0.008196
197.76	0.007466	0.009171	0.009003	0.00819
198	0.007428	0.009145	0.008564	0.008492
198.24	0.007648	0.008479	0.00863	0.008548
198.48	0.007236	0.009014	0.008809	0.008284
198.72	0.007177	0.00874	0.008812	0.008261
198.96	0.007574	0.008505	0.008626	0.008641
199.2	0.007294	0.008602	0.009024	0.008324
199.44	0.007187	0.008653	0.008233	0.008086
199.68	0.007109	0.008863	0.008747	0.008218
199.92	0.007133	0.008848	0.009052	0.008188
200.16	0.007193	0.008673	0.008937	0.008297
200.4	0.007403	0.008688	0.008497	0.008399
200.64	0.007038	0.009279	0.008501	0.0082
200.88	0.007244	0.008703	0.008482	0.00821
201.12	0.007275	0.008633	0.008478	0.008243
201.36	0.006849	0.008562	0.008994	0.008168
201.6	0.006775	0.008602	0.008919	0.00839
201.84	0.007168	0.008781	0.008529	0.008348
202.08	0.007373	0.008754	0.00887	0.008492
202.32	0.007471	0.008859	0.008816	0.008513
202.56	0.007346	0.008962	0.00865	0.008002
202.8	0.007336	0.00884	0.008702	0.008257
203.04	0.007278	0.008944	0.008451	0.008412
203.28	0.007401	0.008646	0.008901	0.008452
203.52	0.007099	0.008457	0.008873	0.008477
203.76	0.00722	0.008866	0.008116	0.008626
204	0.007044	0.008755	0.008919	0.008709
204.24	0.007327	0.008272	0.008598	0.008441
204.48	0.007461	0.009036	0.009018	0.008463
204.72	0.007321	0.008723	0.00842	0.008531
204.96	0.007052	0.008235	0.008967	0.008521
205.2	0.007072	0.008917	0.008883	0.008313
205.44	0.007099	0.008812	0.008658	0.00858
205.68	0.007179	0.008782	0.008644	0.008321
205.92	0.007252	0.009045	0.009149	0.008406
206.16	0.007342	0.008642	0.008178	0.008507
206.4	0.007131	0.008435	0.008474	0.008386
206.64	0.007236	0.008918	0.008451	0.008212
206.88	0.007	0.00849	0.008808	0.008288
207.12	0.006967	0.009029	0.008863	0.008387
207.36	0.007291	0.008553	0.008697	0.008534
207.6	0.007433	0.008349	0.008399	0.008718
207.84	0.007167	0.009157	0.008693	0.008216
208.08	0.007364	0.008868	0.008526	0.008343
208.32	0.007148	0.008535	0.008594	0.008552
208.56	0.007298	0.008431	0.008057	0.008388
208.8	0.007011	0.009013	0.008889	0.008237
209.04	0.00746	0.008496	0.008696	0.008357
209.28	0.007044	0.008536	0.008861	0.00846
209.52	0.007359	0.008713	0.008428	0.008502
209.76	0.007115	0.008502	0.008693	0.008284
210	0.007011	0.008587	0.008375	0.008542
210.24	0.00685	0.008348	0.009159	0.008238
210.48	0.007308	0.008388	0.008228	0.008338
210.72	0.007184	0.008897	0.008981	0.008495
210.96	0.007312	0.008453	0.008352	0.008316
211.2	0.007172	0.008401	0.008389	0.008242
211.44	0.007334	0.008988	0.00827	0.00829
211.68	0.006992	0.008427	0.008258	0.008266
211.92	0.007001	0.008202	0.008544	0.008513
212.16	0.007151	0.008628	0.008469	0.008457
212.4	0.006987	0.008588	0.008218	0.008466
212.64	0.006811	0.008603	0.008233	0.008473
212.88	0.007022	0.008549	0.008816	0.008629
213.12	0.00722	0.008571	0.008106	0.008332
213.36	0.006767	0.008897	0.00849	0.00833
213.6	0.007062	0.00844	0.008395	0.008572
213.84	0.006701	0.008257	0.008294	0.00879
214.08	0.006918	0.008654	0.008957	0.0083
214.32	0.007384	0.008783	0.007899	0.008281
214.56	0.007112	0.007947	0.008362	0.00847
214.8	0.007095	0.008439	0.008126	0.00871
215.04	0.007263	0.008071	0.008488	0.008384
215.28	0.007103	0.00789	0.008599	0.008489
215.52	0.006973	0.008985	0.008151	0.008641
215.76	0.007097	0.008283	0.00825	0.00843
216	0.007354	0.008259	0.008375	0.008431
216.24	0.006877	0.008444	0.008611	0.008228
216.48	0.007383	0.007996	0.008535	0.008505
216.72	0.006962	0.008176	0.008213	0.008482
216.96	0.006946	0.008661	0.008129	0.008523
217.2	0.00696	0.008671	0.008364	0.008764
217.44	0.007115	0.008297	0.008088	0.008725
217.68	0.007258	0.008373	0.008213	0.008432
217.92	0.006983	0.008564	0.008216	0.008324
218.16	0.006613	0.008327	0.008537	0.008532
218.4	0.007122	0.008893	0.008172	0.008495
218.64	0.007006	0.008525	0.008351	0.008364
218.88	0.006642	0.007685	0.007786	0.008376
219.12	0.007099	0.008173	0.008521	0.008208
219.36	0.007343	0.007953	0.008685	0.008429
219.6	0.006777	0.008503	0.008324	0.008385
219.84	0.006938	0.008102	0.007904	0.008468
220.08	0.007039	0.008453	0.008462	0.008511
220.32	0.007097	0.008523	0.008046	0.008325
220.56	0.006851	0.008789	0.008378	0.008327
220.8	0.00706	0.007715	0.008094	0.008486
221.04	0.007201	0.00792	0.008399	0.00834
221.28	0.007006	0.008249	0.008346	0.008259
221.52	0.006691	0.008757	0.007953	0.008455
221.76	0.007108	0.008517	0.008613	0.008448
222	0.007106	0.008203	0.007673	0.008539
222.24	0.00724	0.007938	0.008304	0.008178
222.48	0.006784	0.007624	0.008134	0.008615
222.72	0.006661	0.008047	0.008168	0.008876
222.96	0.006775	0.008114	0.008318	0.008614
223.2	0.006464	0.008292	0.008243	0.008563
223.44	0.007177	0.008451	0.008282	0.008461
223.68	0.006977	0.007976	0.008326	0.008535
223.92	0.006536	0.008435	0.007783	0.008335
224.16	0.0068	0.007621	0.007985	0.008448
224.4	0.007133	0.007859	0.007776	0.008517
224.64	0.006815	0.008207	0.008352	0.008435
224.88	0.006811	0.008361	0.008004	0.008356
225.12	0.006501	0.008117	0.00835	0.008426
225.36	0.006912	0.008541	0.008248	0.00833
225.6	0.006868	0.008317	0.008117	0.008368
225.84	0.006826	0.008102	0.007566	0.008579
226.08	0.007005	0.008303	0.007914	0.008743
226.32	0.006933	0.008362	0.007698	0.008358
226.56	0.00676	0.008309	0.008378	0.008385
226.8	0.007037	0.008259	0.007775	0.008288
227.04	0.006657	0.008204	0.00798	0.008314
227.28	0.006648	0.007701	0.008075	0.008386
227.52	0.006599	0.008214	0.008038	0.008509
227.76	0.006688	0.008311	0.008302	0.008531
228	0.007238	0.007676	0.007845	0.008641
228.24	0.006732	0.007761	0.008249	0.008217
228.48	0.007023	0.007918	0.008334	0.00841
228.72	0.006843	0.008248	0.007755	0.007939
228.96	0.00691	0.008161	0.008356	0.008555
229.2	0.006751	0.007821	0.007599	0.008296
229.44	0.006744	0.00862	0.007594	0.008201
229.68	0.006647	0.008501	0.007932	0.008468
229.92	0.00683	0.00855	0.008419	0.008459
230.16	0.006585	0.007779	0.008461	0.008511
230.4	0.006595	0.007932	0.008133	0.008485
230.64	0.006939	0.008354	0.007418	0.008233
230.88	0.006842	0.007978	0.008147	0.008241
231.12	0.006471	0.00811	0.007734	0.008286
231.36	0.006259	0.007882	0.007736	0.008407
231.6	0.006472	0.00829	0.008249	0.008597
231.84	0.006579	0.008069	0.008284	0.008178
232.08	0.006677	0.007957	0.00849	0.008509
232.32	0.006899	0.008064	0.007732	0.008673
232.56	0.006686	0.007642	0.007672	0.008483
232.8	0.006645	0.008072	0.00735	0.008341
233.04	0.006792	0.007927	0.008099	0.008279
233.28	0.00675	0.00824	0.008335	0.008634
233.52	0.006491	0.008227	0.008578	0.008434
233.76	0.006425	0.008224	0.007626	0.008491
234	0.006714	0.008427	0.008038	0.008429
234.24	0.006681	0.007772	0.008035	0.008388
234.48	0.006701	0.007646	0.0079	0.008266
234.72	0.006603	0.007843	0.007732	0.008297
234.96	0.006671	0.007738	0.007691	0.008678
235.2	0.006881	0.007857	0.007831	0.008629
235.44	0.006543	0.008301	0.007667	0.008268
235.68	0.006621	0.008046	0.007634	0.008306
235.92	0.006592	0.008063	0.007419	0.008391
236.16	0.006849	0.007827	0.007473	0.008366
236.4	0.006755	0.007622	0.008133	0.008555
236.64	0.006802	0.007956	0.008668	0.008376
236.88	0.006593	0.007997	0.007933	0.008542
237.12	0.006602	0.008019	0.008107	0.008436
237.36	0.006441	0.008507	0.00803	0.0086
237.6	0.006761	0.007846	0.007544	0.008426
237.84	0.006639	0.008098	0.00766	0.008318
238.08	0.006855	0.007761	0.007707	0.008534
238.32	0.00625	0.007657	0.007694	0.008246
238.56	0.006506	0.007522	0.007711	0.008497
238.8	0.006827	0.008349	0.007967	0.008481
239.04	0.006618	0.007707	0.007849	0.008074
239.28	0.006562	0.007832	0.007446	0.008305
239.52	0.006659	0.007755	0.008005	0.008456
239.76	0.00661	0.007377	0.007335	0.008225

## Sheet: M4R
Time	Exp1	Exp2	Exp3	Exp4
0	-5.09325e-05	0.00021	9.22e-05	8.42567e-05
0.24	4.35251e-05	-6.2e-05	-0.00017	8.956e-05
0.48	0.000316309	0.00046	0.000216	0.000217015
0.72	0.000361601	-6.7e-05	0.000238	0.000180302
0.96	0.000433325	0.00025	0.000133	0.000102053
1.2	0.000161794	0.000195	4.94e-05	2.50555e-05
1.44	0.000167191	0.000319	0.000123	0.000446274
1.68	-1.57785e-05	2.52e-05	0.00029	-3.56753e-05
1.92	5.30483e-05	0.000199	-9.8e-05	0.000304247
2.16	5.89734e-05	-4.1e-05	0.000609	4.97667e-05
2.4	0.000193858	-3.3e-05	-8e-05	0.000224161
2.64	0.000260752	-1.2e-07	-0.00016	0.000247639
2.88	-1.456e-05	0.000167	9.45e-05	0.000364471
3.12	0.000138156	-0.00028	-0.00017	0.000180218
3.36	0.000143088	0.000188	0.000416	8.01974e-05
3.6	-3.08485e-06	-0.00016	-5.7e-06	0.000103055
3.84	0.000180371	0.000161	8.65e-05	2.04694e-05
4.08	0.000327493	0.00034	0.000213	-2.29287e-05
4.32	7.58603e-05	-8.2e-05	3.02e-05	0.000148115
4.56	-0.000129964	0.000198	-9.4e-05	0.000140368
4.8	0.000212663	-4.7e-05	-0.00011	0.000164515
5.04	-0.000207126	0.00037	0.000406	9.32357e-05
5.28	0.000244604	0.000287	-0.00012	0.000299458
5.52	5.04363e-05	0.000108	6.28e-05	0.000149277
5.76	0.000200587	2.27e-05	1e-05	0.000178249
6	-4.19404e-05	-0.00012	0.000106	-1.58111e-05
6.24	-4.39065e-05	0.000184	9.63e-06	0.000221071
6.48	5.05032e-05	0.000424	6.97e-05	0.000291619
6.72	0.000187705	0.000371	3.13e-05	0.000206563
6.96	0.000267157	0.000145	-0.00013	-7.52394e-05
7.2	0.000101975	0.000263	0.000327	0.000160066
7.44	0.000490022	-0.00019	-0.00022	1.77571e-05
7.68	8.13383e-05	-0.00018	-3.8e-05	7.37109e-05
7.92	-0.00036384	-0.0003	0.000185	0.000217384
8.16	-0.000220838	7.17e-05	-0.00015	-1.62321e-05
8.4	0.000296847	0.000207	-0.00024	9.25164e-05
8.64	-3.09672e-05	0.000164	0.000103	1.25633e-05
8.88	0.000294403	-0.00018	-1.2e-05	0.000200468
9.12	4.79138e-05	0.000119	0.000266	0.000165336
9.36	-0.000199333	-5.5e-05	-0.00026	0.000184074
9.6	0.000316266	0.000409	0.000358	0.00027109
9.84	-0.000113123	6.02e-05	-0.0001	0.000140633
10.08	2.34222e-05	-0.00037	4.85e-05	0.000163556
10.32	0.000171308	-5.3e-05	0.000226	0.00019546
10.56	-0.000234068	-0.0001	5.2e-05	9.3393e-05
10.8	-4.71994e-05	0.000695	0.000189	0.000103101
11.04	-4.10248e-05	-0.00014	1.17e-06	0.000214281
11.28	3.71132e-05	-3.6e-05	0.000312	7.46459e-05
11.52	0.000334364	-0.00016	-0.00027	0.000159177
11.76	0.000177339	-0.0002	6.22e-05	-6.81527e-05
12	0.000121197	0.00015	9.87e-05	0.000285581
12.24	-0.000210971	-0.00015	-9.7e-05	0.000257172
12.48	-2.31788e-05	0.000198	-6.7e-05	-6.35445e-05
12.72	4.3549e-05	0.000201	-0.00041	0.000102822
12.96	-2.17045e-05	5.27e-05	0.00041	-7.85938e-05
13.2	2.83312e-05	-0.00013	5.71e-05	-0.000182695
13.44	-0.00011396	3.33e-05	-0.00014	0.000102285
13.68	-0.000141563	7.5e-07	-0.00011	-0.000142204
13.92	3.81789e-05	3.6e-06	5.16e-05	5.66845e-05
14.16	6.56438e-05	0.000341	-0.00013	0.000218362
14.4	0.000170149	-0.00039	0.00034	-1.27803e-05
14.64	0.000228556	0.00015	3.84e-05	-0.000218608
14.88	-0.000160921	-6.6e-05	-0.00034	1.84913e-05
15.12	-0.000159166	0.000393	-0.00024	-0.000132265
15.36	0.000228875	8.19e-06	-3.4e-05	4.6196e-05
15.6	-0.000216172	-5.4e-05	0.000283	-4.58965e-05
15.84	0.000267722	-0.00029	-9.3e-05	-4.72464e-05
16.08	-0.000205258	-0.00034	-7.9e-05	-0.000112434
16.32	9.12313e-05	2.21e-05	1.17e-05	-0.000118615
16.56	0.000259451	0.000153	5.92e-05	7.03714e-05
16.8	-0.000142733	0.000247	0.000191	-8.06491e-06
17.04	-0.000134028	-0.00027	0.000212	-6.51629e-06
17.28	0.00011664	-0.00026	-0.00011	6.97534e-05
17.52	0.000128585	8.18e-05	3.26e-06	-0.000210569
17.76	0.000268902	0.000227	0.000352	-0.00019576
18	-0.000193707	-0.00034	0.000438	5.57296e-05
18.24	-0.000278723	-0.00019	-0.00068	1.50094e-05
18.48	0.00024866	-9e-05	-0.00017	-0.000175988
18.72	0.000118238	0.000177	-0.0003	-0.000181073
18.96	-0.000438586	-8.2e-05	-0.00023	5.59979e-05
19.2	2.74467e-05	-0.00013	-0.00063	3.85496e-05
19.44	3.11449e-05	-0.00012	-0.00017	-0.000282216
19.68	-0.0002323	-0.00018	0.000316	1.49306e-06
19.92	1.36691e-05	3.91e-05	3.2e-05	-0.000225841
20.16	2.13149e-05	0.000231	-0.0003	-0.000234003
20.4	4.33449e-06	0.00017	0.000313	0.000249106
20.64	0.000198216	-0.00015	2.88e-05	-0.000234446
20.88	-0.000161876	0.000131	0.000236	-0.000119577
21.12	5.62159e-05	0.00027	-0.0002	-0.000122452
21.36	-8.69139e-05	-0.00017	-0.00024	-0.000260054
21.6	-0.000215042	-0.00019	-7.3e-05	-0.000206489
21.84	0.000219058	-8.4e-05	2.01e-05	-0.000371357
22.08	-0.000418415	0.000328	-6.1e-06	-8.68078e-05
22.32	9.54153e-05	-0.00021	1.05e-05	-0.000277108
22.56	0.000205859	0.000132	-2.8e-05	-8.29988e-05
22.8	8.61558e-05	-0.00038	7.94e-05	-0.000134324
23.04	-0.000344357	9.56e-05	4.73e-05	-1.23306e-05
23.28	-0.000203914	0.00016	-8.9e-05	0.000115353
23.52	0.000206325	-0.00014	-0.00049	-0.00020061
23.76	-0.000212352	1.69e-05	0.000194	-0.000356103
24	-0.000300208	-0.00027	0.000256	-7.41726e-05
24.24	-8.97541e-05	-0.00012	-1.4e-05	-7.03157e-05
24.48	-9.0744e-05	4.18e-05	0.000101	-0.000302377
24.72	-0.000345758	-0.00028	0.00022	-0.000155647
24.96	-0.000153334	8.82e-05	-7.5e-05	-0.000370502
25.2	6.79187e-05	-0.00034	5.23e-06	-0.000337007
25.44	-1.21594e-05	-0.00028	-2.2e-05	-0.000188527
25.68	-6.91094e-05	-0.00013	0.000134	-7.53856e-05
25.92	-7.06242e-05	-4.1e-05	0.000447	-0.0001162
26.16	-0.000123936	7.44e-05	1.09e-06	-0.000331718
26.4	-7.70288e-05	-0.00028	0.000291	1.01518e-05
26.64	-0.000454822	-0.00027	-0.0003	-0.000210783
26.88	-0.000101695	-0.00016	-0.00055	-4.97835e-05
27.12	-0.000205063	-3.6e-05	-0.0004	-0.000113535
27.36	-0.00017888	-0.00053	-5.9e-05	-0.000337238
27.6	-0.000174448	0.000226	-0.0003	-0.00021339
27.84	-5.85401e-05	0.000284	0.000247	9.22863e-05
28.08	-0.000141194	-0.00011	0.000199	7.58974e-05
28.32	-0.000278506	-0.00039	1.41e-05	-0.000227455
28.56	2.83099e-05	4.16e-05	-9.8e-06	7.66469e-05
28.8	-0.000257937	-0.00025	-2.1e-05	4.78835e-05
29.04	-0.000335478	3.93e-05	-0.00052	-0.000388016
29.28	-0.000244073	-0.00024	-0.00041	-5.85315e-05
29.52	0.000117457	-0.00032	0.000171	-6.26968e-06
29.76	-0.000467239	-0.00011	-0.00077	-0.000211784
30	-8.22044e-06	-6.2e-05	0.000147	-0.000107788
30.24	0.000164284	0.000581	0.000403	0.000508291
30.48	0.000502242	0.001193	0.001083	0.00157085
30.72	-0.00907513	-0.00733	-0.00886	-0.00691896
30.96	0.0351251	0.037871	0.032689	0.0839945
31.2	-0.0594379	-0.05057	-0.05625	-0.0524396
31.44	0.145775	0.125735	0.136095	0.135875
31.68	0.0187463	0.018414	0.01931	0.019815
31.92	0.00275041	0.003889	0.004203	0.00501053
32.16	0.00310765	0.004507	0.005021	0.00547674
32.4	0.00365597	0.004705	0.005113	0.00544014
32.64	0.00351099	0.004999	0.005285	0.00629578
32.88	0.0038442	0.005071	0.005961	0.0064817
33.12	0.00405756	0.005713	0.006383	0.00677394
33.36	0.0046256	0.005782	0.006693	0.0071081
33.6	0.0045265	0.006499	0.006546	0.0073082
33.84	0.00471309	0.006168	0.007209	0.00772196
34.08	0.00501653	0.006913	0.006813	0.00824106
34.32	0.00514346	0.006903	0.007391	0.00830405
34.56	0.00498123	0.006909	0.007374	0.00831043
34.8	0.0052302	0.007295	0.008102	0.00885273
35.04	0.00555219	0.007337	0.007918	0.00897165
35.28	0.00587256	0.007567	0.008339	0.00940646
35.52	0.00598512	0.007214	0.008305	0.00930601
35.76	0.0056858	0.007874	0.008507	0.0096581
36	0.00609583	0.007924	0.008473	0.0098939
36.24	0.00643323	0.007793	0.008619	0.00990237
36.48	0.00657752	0.008029	0.008788	0.0100471
36.72	0.00655314	0.008026	0.009553	0.0104584
36.96	0.00659227	0.008799	0.009202	0.0106692
37.2	0.00666349	0.008563	0.009776	0.0106008
37.44	0.00674788	0.008515	0.010075	0.0105399
37.68	0.00679043	0.008727	0.00976	0.010802
37.92	0.00701554	0.008495	0.009909	0.011139
38.16	0.00693302	0.009077	0.010112	0.0110233
38.4	0.00653775	0.008681	0.010335	0.0113686
38.64	0.00721855	0.009178	0.009701	0.0111117
38.88	0.00685602	0.009409	0.0104	0.0115212
39.12	0.00699992	0.009289	0.010482	0.0115651
39.36	0.00687164	0.009255	0.01014	0.0114473
39.6	0.00750416	0.009668	0.010284	0.0115058
39.84	0.00737415	0.009175	0.010746	0.0120007
40.08	0.00746812	0.00899	0.010775	0.0119795
40.32	0.00729587	0.00952	0.010451	0.0116196
40.56	0.00727329	0.009718	0.010611	0.0120185
40.8	0.00717991	0.009854	0.010326	0.0120446
41.04	0.00749382	0.010148	0.010535	0.0119483
41.28	0.00791928	0.009704	0.010699	0.0121325
41.52	0.00782611	0.010075	0.010651	0.0124748
41.76	0.00765088	0.009702	0.011082	0.012452
42	0.00785642	0.010123	0.011043	0.0122248
42.24	0.0077507	0.00982	0.010757	0.0124643
42.48	0.00760952	0.009916	0.011118	0.012383
42.72	0.00793297	0.01037	0.011475	0.0124603
42.96	0.00786663	0.010224	0.011638	0.0125571
43.2	0.00796574	0.009969	0.011131	0.0128251
43.44	0.00822131	0.010373	0.011871	0.012806
43.68	0.00812952	0.00998	0.010948	0.0125942
43.92	0.00793012	0.010445	0.011454	0.0124872
44.16	0.00779721	0.010762	0.011375	0.0127141
44.4	0.00801084	0.010496	0.011338	0.0130134
44.64	0.00789074	0.009999	0.011623	0.012802
44.88	0.00805647	0.010301	0.011987	0.0126412
45.12	0.00799145	0.010768	0.011581	0.0125626
45.36	0.00840704	0.010298	0.011847	0.0131882
45.6	0.00824543	0.010473	0.01142	0.0130661
45.84	0.00818736	0.01047	0.012032	0.0128202
46.08	0.00814511	0.010054	0.011392	0.0129064
46.32	0.00807526	0.010558	0.011798	0.0131842
46.56	0.0081988	0.010722	0.011728	0.0131285
46.8	0.00820583	0.010448	0.011578	0.0131804
47.04	0.00846745	0.010355	0.012232	0.0131736
47.28	0.00826092	0.011089	0.011714	0.0131948
47.52	0.00844959	0.010942	0.011928	0.013468
47.76	0.00844624	0.010569	0.011887	0.0134185
48	0.00841844	0.010838	0.012269	0.0132417
48.24	0.0086519	0.010816	0.011559	0.013348
48.48	0.00835268	0.010685	0.012162	0.0136876
48.72	0.00846713	0.010607	0.011895	0.0132589
48.96	0.00828505	0.011098	0.011437	0.013422
49.2	0.00848703	0.01047	0.011862	0.0135553
49.44	0.00825469	0.010953	0.012282	0.0132519
49.68	0.00874699	0.010702	0.012066	0.0134846
49.92	0.00880097	0.011025	0.012503	0.0136921
50.16	0.00898338	0.011061	0.012037	0.0132643
50.4	0.00852673	0.010973	0.012571	0.013644
50.64	0.00867863	0.010867	0.011893	0.0136709
50.88	0.00912273	0.011328	0.012359	0.0134761
51.12	0.00886226	0.011126	0.012209	0.0137193
51.36	0.0087685	0.010988	0.012582	0.013718
51.6	0.00869436	0.010876	0.012341	0.0137244
51.84	0.00855213	0.011073	0.012582	0.0136707
52.08	0.0088596	0.011288	0.012619	0.0135454
52.32	0.00868876	0.011728	0.012013	0.0137072
52.56	0.00867102	0.0114	0.012622	0.0139125
52.8	0.008685	0.011358	0.012645	0.0141968
53.04	0.00880047	0.010885	0.012221	0.0138263
53.28	0.00848922	0.010977	0.012356	0.0138537
53.52	0.00887437	0.011249	0.012363	0.0138641
53.76	0.00865364	0.010663	0.012472	0.0135426
54	0.00914972	0.011304	0.012511	0.0134828
54.24	0.00880531	0.011137	0.01189	0.0136306
54.48	0.00881742	0.011031	0.012543	0.0139909
54.72	0.00828525	0.011197	0.01278	0.0139009
54.96	0.00881866	0.01084	0.01257	0.0140889
55.2	0.00903755	0.011143	0.012587	0.0138836
55.44	0.00913723	0.011132	0.012446	0.0136996
55.68	0.00887367	0.010967	0.012527	0.0140867
55.92	0.00895487	0.011273	0.012727	0.0139408
56.16	0.00869241	0.010913	0.012456	0.0138588
56.4	0.00880654	0.011681	0.012549	0.0140573
56.64	0.00890642	0.011048	0.012582	0.0138272
56.88	0.00886349	0.010814	0.013033	0.0140179
57.12	0.00894074	0.011237	0.012419	0.0139628
57.36	0.00880501	0.011417	0.012561	0.0141592
57.6	0.00913574	0.011197	0.012677	0.0139907
57.84	0.00882196	0.01131	0.01342	0.0140008
58.08	0.00919497	0.011745	0.012503	0.0138899
58.32	0.00891743	0.011404	0.013071	0.0139419
58.56	0.00881005	0.01136	0.012579	0.0142106
58.8	0.00898124	0.011142	0.012933	0.0142551
59.04	0.00900422	0.011276	0.012593	0.014134
59.28	0.00897474	0.011268	0.013155	0.0143266
59.52	0.00900491	0.010983	0.012317	0.0139684
59.76	0.0090823	0.011416	0.012359	0.0142969
60	0.00926389	0.01126	0.013004	0.0141972
60.24	0.00916086	0.011111	0.012404	0.0139872
60.48	0.00883939	0.011307	0.012424	0.0139981
60.72	0.00891184	0.011087	0.012546	0.0139881
60.96	0.00869537	0.011084	0.012608	0.0141796
61.2	0.00896861	0.011463	0.013115	0.0141585
61.44	0.00908635	0.011495	0.013068	0.0142487
61.68	0.00919116	0.011152	0.012927	0.0140368
61.92	0.00891945	0.011281	0.012758	0.014307
62.16	0.00929765	0.011833	0.01268	0.014278
62.4	0.00911907	0.011371	0.012711	0.0142233
62.64	0.00910585	0.011302	0.012898	0.0143567
62.88	0.00908517	0.011508	0.013025	0.0140797
63.12	0.00867347	0.011253	0.012931	0.014227
63.36	0.00902683	0.011153	0.01248	0.0139543
63.6	0.00937222	0.011038	0.013052	0.0142144
63.84	0.00906369	0.011031	0.012692	0.0143633
64.08	0.00876949	0.011326	0.01305	0.0145662
64.32	0.00925797	0.011224	0.013027	0.014199
64.56	0.00915626	0.010747	0.012939	0.0143732
64.8	0.00931254	0.011406	0.01326	0.0140437
65.04	0.00911972	0.010865	0.01236	0.0139615
65.28	0.00929528	0.011198	0.013326	0.0143557
65.52	0.00907672	0.011198	0.012978	0.0143308
65.76	0.00937266	0.011125	0.012934	0.0142524
66	0.00893845	0.01146	0.013064	0.0143689
66.24	0.00916669	0.010935	0.013087	0.0142334
66.48	0.00887859	0.011199	0.012875	0.0142769
66.72	0.00906854	0.011064	0.013036	0.0143098
66.96	0.00938076	0.011334	0.01285	0.0143829
67.2	0.00876051	0.011704	0.012979	0.014486
67.44	0.00915069	0.011037	0.013496	0.0141175
67.68	0.00883574	0.010814	0.012572	0.0142006
67.92	0.00905863	0.01143	0.012856	0.0142383
68.16	0.00906533	0.011083	0.013086	0.0144154
68.4	0.0091964	0.011068	0.013075	0.0143579
68.64	0.00920287	0.011252	0.012784	0.0141649
68.88	0.00888123	0.011418	0.012877	0.0142031
69.12	0.00886613	0.010756	0.012672	0.0143802
69.36	0.00883811	0.011378	0.012992	0.0141233
69.6	0.00911655	0.011287	0.012857	0.0143065
69.84	0.00883471	0.011421	0.012991	0.0144185
70.08	0.00928689	0.011051	0.013099	0.0144141
70.32	0.00900289	0.011441	0.01306	0.0143189
70.56	0.00896494	0.011193	0.012765	0.0144747
70.8	0.00943252	0.011049	0.012966	0.0141476
71.04	0.00896943	0.011379	0.013326	0.0142481
71.28	0.00896465	0.011245	0.01313	0.0142508
71.52	0.00905783	0.011217	0.013138	0.0141403
71.76	0.0086813	0.010783	0.013062	0.0145685
72	0.00848334	0.011456	0.013086	0.0144183
72.24	0.00921687	0.011028	0.013434	0.0141533
72.48	0.00902542	0.011426	0.012898	0.0146306
72.72	0.00893072	0.011534	0.012617	0.0144395
72.96	0.00920499	0.011188	0.012801	0.0139326
73.2	0.00911787	0.011155	0.013337	0.0144082
73.44	0.009015	0.011374	0.012692	0.0144789
73.68	0.00883307	0.010988	0.01315	0.0143782
73.92	0.00927511	0.011074	0.012953	0.0146391
74.16	0.00916519	0.011063	0.013199	0.0139735
74.4	0.0092339	0.011255	0.012868	0.0145398
74.64	0.00886536	0.011229	0.012699	0.0142305
74.88	0.00867984	0.01132	0.012937	0.0144224
75.12	0.00879228	0.01161	0.01346	0.0145938
75.36	0.0089343	0.011519	0.013242	0.0144197
75.6	0.00863671	0.011171	0.013129	0.0144588
75.84	0.00910342	0.011124	0.012986	0.0145004
76.08	0.00916823	0.011469	0.012557	0.0143385
76.32	0.00885908	0.010999	0.012996	0.0140931
76.56	0.00883388	0.011012	0.013292	0.0143206
76.8	0.00895116	0.011199	0.012909	0.0144123
77.04	0.00872909	0.011086	0.013227	0.0145517
77.28	0.00872339	0.011483	0.012821	0.0143256
77.52	0.00912017	0.011386	0.01305	0.014093
77.76	0.00901815	0.011539	0.013446	0.0145927
78	0.00910871	0.011085	0.012882	0.0143638
78.24	0.0090363	0.011461	0.01285	0.0144475
78.48	0.00889647	0.011136	0.012686	0.0144207
78.72	0.00880504	0.011042	0.013057	0.0143657
78.96	0.00898852	0.010997	0.013538	0.0144354
79.2	0.0090006	0.011197	0.013235	0.0143381
79.44	0.00898422	0.011177	0.013292	0.0142028
79.68	0.00902155	0.011236	0.013039	0.0142187
79.92	0.00873333	0.011323	0.013362	0.0143525
80.16	0.00901042	0.010877	0.013509	0.0143269
80.4	0.00894182	0.011154	0.012867	0.0146933
80.64	0.00844493	0.01157	0.013159	0.0142417
80.88	0.00877775	0.011176	0.013196	0.0140096
81.12	0.00873568	0.011404	0.013218	0.0142059
81.36	0.0090612	0.010858	0.012904	0.014583
81.6	0.00865057	0.011192	0.012991	0.0141391
81.84	0.00873195	0.010953	0.013065	0.0147282
82.08	0.00876009	0.010595	0.012771	0.0142677
82.32	0.0086818	0.010944	0.013033	0.0141913
82.56	0.00869993	0.011442	0.013033	0.0142973
82.8	0.00891009	0.011377	0.013508	0.0143764
83.04	0.00874277	0.010769	0.013108	0.0142174
83.28	0.00899445	0.011375	0.013162	0.0142375
83.52	0.00901114	0.010858	0.013226	0.0144069
83.76	0.00884916	0.010928	0.013358	0.0141553
84	0.00890324	0.011375	0.012852	0.0138978
84.24	0.00900441	0.011678	0.0133	0.0145525
84.48	0.00906825	0.011485	0.013037	0.0144528
84.72	0.00861383	0.011007	0.012817	0.0143013
84.96	0.00891284	0.01093	0.012671	0.0142642
85.2	0.00838495	0.010967	0.013061	0.0146317
85.44	0.00897003	0.011428	0.012787	0.0144142
85.68	0.00868624	0.010721	0.01343	0.014325
85.92	0.00894467	0.01153	0.013277	0.0146343
86.16	0.00883272	0.010881	0.012975	0.0144251
86.4	0.00896701	0.011364	0.012879	0.0144739
86.64	0.00854555	0.011312	0.012735	0.0141816
86.88	0.00890029	0.011081	0.01376	0.0142052
87.12	0.00868084	0.01078	0.01362	0.014265
87.36	0.00877835	0.011137	0.013005	0.0146615
87.6	0.00867499	0.011329	0.01299	0.0143918
87.84	0.00860934	0.011046	0.013174	0.0142916
88.08	0.00855587	0.010955	0.013546	0.014212
88.32	0.0088392	0.010989	0.012779	0.0145461
88.56	0.00835087	0.01061	0.013196	0.0142505
88.8	0.00893517	0.010837	0.01284	0.0141446
89.04	0.00873656	0.01089	0.013299	0.0142323
89.28	0.00872718	0.011312	0.013273	0.014405
89.52	0.00871929	0.011237	0.013013	0.0144043
89.76	0.00892097	0.011051	0.013041	0.0143939
90	0.00876259	0.010834	0.013175	0.0144397
90.24	0.00891892	0.010759	0.013427	0.0145781
90.48	0.00896759	0.010992	0.012993	0.0141613
90.72	0.00867665	0.011298	0.013227	0.0143997
90.96	0.00894177	0.01081	0.013138	0.0142371
91.2	0.00880854	0.011351	0.012585	0.0144559
91.44	0.00908785	0.01121	0.012454	0.0142697
91.68	0.00914336	0.011238	0.013054	0.0140731
91.92	0.00898393	0.01062	0.012918	0.0140477
92.16	0.00878499	0.010406	0.013143	0.0140631
92.4	0.008471	0.010493	0.013716	0.0143516
92.64	0.0087093	0.010864	0.013032	0.0141341
92.88	0.00871184	0.011112	0.013153	0.0142775
93.12	0.0088097	0.010856	0.013048	0.0139245
93.36	0.00874131	0.010913	0.013201	0.0144142
93.6	0.00864094	0.010974	0.013332	0.0145325
93.84	0.00876019	0.010728	0.01286	0.014153
94.08	0.00867086	0.010902	0.012827	0.0142876
94.32	0.00886221	0.01072	0.013468	0.0141522
94.56	0.0083408	0.010285	0.013356	0.0144386
94.8	0.00859905	0.01105	0.013117	0.014075
95.04	0.008672	0.010499	0.013332	0.0142169
95.28	0.00883467	0.011108	0.0135	0.0145296
95.52	0.00876171	0.011024	0.013052	0.0143475
95.76	0.00862084	0.011179	0.013116	0.0143684
96	0.00915565	0.010792	0.013367	0.0143986
96.24	0.00884512	0.010989	0.013279	0.0141464
96.48	0.00896706	0.010768	0.013633	0.014028
96.72	0.00857798	0.011163	0.012908	0.0143051
96.96	0.00878769	0.010959	0.013138	0.0140654
97.2	0.00889025	0.010434	0.013462	0.014066
97.44	0.00853074	0.010821	0.012744	0.0141867
97.68	0.00846285	0.010895	0.013391	0.014192
97.92	0.00839818	0.010676	0.013368	0.014119
98.16	0.00895913	0.010332	0.012926	0.0143318
98.4	0.00845235	0.010186	0.012944	0.0144135
98.64	0.00855225	0.01078	0.013076	0.0142158
98.88	0.00862835	0.010861	0.013075	0.0143073
99.12	0.00896077	0.010746	0.012629	0.0141624
99.36	0.00847086	0.010872	0.013329	0.0142577
99.6	0.0087102	0.010468	0.012729	0.0141019
99.84	0.0087307	0.010626	0.012862	0.0142553
100.08	0.00807276	0.01075	0.013207	0.0140048
100.32	0.00862409	0.010467	0.013032	0.0140247
100.56	0.00845001	0.011091	0.012677	0.0143059
100.8	0.00872538	0.011187	0.012849	0.0141647
101.04	0.00849258	0.010804	0.012765	0.0141587
101.28	0.00849887	0.010261	0.012953	0.0143627
101.52	0.00871549	0.0106	0.012954	0.0141166
101.76	0.00858344	0.010553	0.012803	0.0138948
102	0.00850727	0.010449	0.012788	0.0141143
102.24	0.00858568	0.010614	0.012566	0.0140027
102.48	0.00838704	0.011289	0.012914	0.0144123
102.72	0.00843736	0.010746	0.01283	0.0140229
102.96	0.00824542	0.010925	0.013033	0.0141929
103.2	0.00823403	0.010687	0.013127	0.0141551
103.44	0.00815321	0.010173	0.013302	0.0143806
103.68	0.00846216	0.010526	0.012968	0.0143032
103.92	0.00831854	0.010962	0.013041	0.01411
104.16	0.00834876	0.01098	0.013193	0.0142748
104.4	0.00858099	0.010672	0.013492	0.0140377
104.64	0.00838421	0.011158	0.013253	0.0140391
104.88	0.00856145	0.010909	0.012873	0.014187
105.12	0.00875558	0.010582	0.013011	0.0144809
105.36	0.00885699	0.010654	0.013112	0.0139025
105.6	0.00858805	0.010874	0.013146	0.0144307
105.84	0.00848218	0.010769	0.01297	0.0141543
106.08	0.00855823	0.010792	0.012739	0.0139474
106.32	0.00847397	0.01078	0.013416	0.0139218
106.56	0.00835265	0.010861	0.012617	0.0139558
106.8	0.00833952	0.010889	0.012761	0.0136077
107.04	0.00838147	0.010726	0.012957	0.0140608
107.28	0.00813542	0.010627	0.012866	0.0141368
107.52	0.00882709	0.010543	0.013021	0.0141025
107.76	0.00837017	0.010775	0.013101	0.0140324
108	0.00842451	0.010436	0.013024	0.0141441
108.24	0.00824293	0.01046	0.012865	0.0140476
108.48	0.00818257	0.010399	0.013116	0.0140715
108.72	0.00832184	0.010092	0.012641	0.0139877
108.96	0.00829052	0.010442	0.012972	0.0141233
109.2	0.00851379	0.010475	0.013331	0.0141658
109.44	0.00826273	0.010813	0.012889	0.0139313
109.68	0.00829502	0.010337	0.012651	0.0139051
109.92	0.00833838	0.010509	0.013174	0.0140538
110.16	0.00833238	0.010316	0.0127	0.0136967
110.4	0.00855022	0.010402	0.013602	0.0142028
110.64	0.00816714	0.010212	0.01312	0.014275
110.88	0.00815377	0.010887	0.012938	0.0135147
111.12	0.00814792	0.010465	0.013203	0.0139365
111.36	0.00842789	0.010272	0.013363	0.0139
111.6	0.00835286	0.010308	0.013035	0.0139796
111.84	0.00806902	0.010596	0.013168	0.0140026
112.08	0.00829674	0.010597	0.012599	0.0138687
112.32	0.00847016	0.01016	0.012339	0.0139107
112.56	0.00851762	0.010562	0.012783	0.0137213
112.8	0.00818939	0.010418	0.012689	0.0142139
113.04	0.00803593	0.010084	0.01291	0.0140912
113.28	0.00806585	0.01043	0.013195	0.0140974
113.52	0.00784238	0.01082	0.012851	0.0140666
113.76	0.00827282	0.010518	0.012841	0.0138423
114	0.0083486	0.010852	0.013156	0.0136374
114.24	0.00833671	0.010532	0.013143	0.0138392
114.48	0.00848433	0.010811	0.012831	0.0140135
114.72	0.00797455	0.010304	0.012778	0.0139183
114.96	0.00810191	0.01063	0.012104	0.0137642
115.2	0.00857411	0.010186	0.012174	0.0136888
115.44	0.00820918	0.01052	0.01292	0.0135858
115.68	0.00804159	0.010489	0.012839	0.0137808
115.92	0.00815138	0.010732	0.012871	0.0138914
116.16	0.0079531	0.010516	0.012697	0.0138409
116.4	0.0085833	0.010339	0.01281	0.0140615
116.64	0.0083011	0.010354	0.01317	0.0139585
116.88	0.00773435	0.010899	0.012953	0.0136096
117.12	0.00845829	0.010084	0.013351	0.0136349
117.36	0.00805977	0.010167	0.013036	0.0136597
117.6	0.00809243	0.009938	0.012561	0.0140899
117.84	0.00815191	0.010373	0.012886	0.01393
118.08	0.00843378	0.010385	0.013079	0.0139611
118.32	0.00820663	0.010099	0.013186	0.0140179
118.56	0.00778485	0.010004	0.012905	0.0138968
118.8	0.00830873	0.01035	0.012904	0.0140514
119.04	0.0083342	0.010244	0.012209	0.0136529
119.28	0.00805565	0.010337	0.013075	0.0137883
119.52	0.00798511	0.010166	0.012841	0.0141277
119.76	0.00802384	0.010042	0.012566	0.013923
120	0.00784414	0.01042	0.012877	0.0138019
120.24	0.00803297	0.010241	0.012444	0.0136994
120.48	0.00802535	0.010281	0.012495	0.0135432
120.72	0.00799842	0.010545	0.012619	0.0137172
120.96	0.0079634	0.009985	0.012659	0.0139162
121.2	0.00796759	0.010325	0.013091	0.0137532
121.44	0.0079765	0.010235	0.01249	0.0139304
121.68	0.00828272	0.010655	0.012966	0.0135439
121.92	0.00814694	0.009696	0.012528	0.0137714
122.16	0.00777731	0.010425	0.012915	0.013814
122.4	0.00810499	0.010009	0.012966	0.0138313
122.64	0.00796539	0.010207	0.012868	0.0138116
122.88	0.00812674	0.010466	0.012304	0.0138774
123.12	0.007865	0.010605	0.012822	0.0136294
123.36	0.00819792	0.009956	0.012407	0.0139978
123.6	0.0079512	0.010618	0.012862	0.0136284
123.84	0.00793213	0.009942	0.012618	0.013501
124.08	0.00781137	0.010275	0.012316	0.0138475
124.32	0.00803995	0.010289	0.012813	0.0137319
124.56	0.00774675	0.010492	0.012375	0.0134796
124.8	0.00808653	0.009877	0.012923	0.0135739
125.04	0.00843606	0.010258	0.012301	0.0139254
125.28	0.00793809	0.010296	0.012681	0.0135909
125.52	0.0081372	0.010041	0.012757	0.0135909
125.76	0.00788812	0.010278	0.013029	0.0136533
126	0.00772983	0.009742	0.012721	0.0139194
126.24	0.00774136	0.010158	0.012495	0.013671
126.48	0.00773286	0.009772	0.012706	0.0135652
126.72	0.00770867	0.010067	0.012767	0.0136267
126.96	0.007914	0.00998	0.012417	0.0136706
127.2	0.00800252	0.009931	0.012209	0.0136219
127.44	0.00801322	0.010035	0.01252	0.013437
127.68	0.00766199	0.01017	0.012782	0.0135626
127.92	0.00785106	0.009942	0.012327	0.0137351
128.16	0.00777971	0.010266	0.012367	0.0136414
128.4	0.00774213	0.010003	0.012744	0.0134284
128.64	0.0078674	0.010306	0.012679	0.0136573
128.88	0.00760244	0.010142	0.01287	0.0135821
129.12	0.00771483	0.009822	0.012441	0.013446
129.36	0.00778616	0.010067	0.012797	0.0136934
129.6	0.00785665	0.009778	0.012466	0.0135932
129.84	0.00770313	0.010051	0.012693	0.0134364
130.08	0.00806803	0.009695	0.012662	0.0136472
130.32	0.00758509	0.009648	0.01241	0.0134862
130.56	0.00778851	0.010072	0.013065	0.0134735
130.8	0.00761596	0.009759	0.012188	0.0136057
131.04	0.00773141	0.010281	0.012152	0.0135024
131.28	0.00776018	0.009618	0.012504	0.0134352
131.52	0.00787924	0.009867	0.012613	0.0133072
131.76	0.00742537	0.009989	0.011942	0.0132437
132	0.00771567	0.010088	0.012486	0.0136926
132.24	0.00806252	0.009773	0.012643	0.013435
132.48	0.0079465	0.010196	0.012549	0.0136104
132.72	0.00744432	0.009868	0.011904	0.01329
132.96	0.00796869	0.009799	0.012441	0.0136597
133.2	0.00764198	0.009988	0.01216	0.013541
133.44	0.00767615	0.009958	0.012196	0.0136988
133.68	0.00790467	0.009529	0.01226	0.0138621
133.92	0.00747973	0.01001	0.012614	0.0134743
134.16	0.00772422	0.010057	0.013047	0.0136371
134.4	0.00772432	0.009721	0.012869	0.0135532
134.64	0.007568	0.010403	0.012826	0.0133268
134.88	0.00757424	0.009581	0.012486	0.0133314
135.12	0.007604	0.009704	0.012536	0.0133983
135.36	0.00758409	0.009497	0.011803	0.0135702
135.6	0.00782297	0.00983	0.012708	0.0134147
135.84	0.00749299	0.009756	0.012426	0.0131908
136.08	0.00778109	0.009824	0.012294	0.0133627
136.32	0.00777099	0.009709	0.012594	0.0132148
136.56	0.00779455	0.009994	0.012446	0.0134333
136.8	0.00734955	0.009734	0.012359	0.0133863
137.04	0.0076863	0.009363	0.01205	0.0134202
137.28	0.00771216	0.009499	0.012042	0.0135485
137.52	0.00789574	0.009908	0.012044	0.0133518
137.76	0.00763849	0.009429	0.012363	0.0131806
138	0.00783389	0.009858	0.012372	0.0133664
138.24	0.00735128	0.009848	0.012723	0.013463
138.48	0.00755103	0.009676	0.012324	0.0134086
138.72	0.00756207	0.009146	0.012137	0.0134859
138.96	0.00757612	0.0095	0.012462	0.0132818
139.2	0.00766695	0.009762	0.012254	0.013239
139.44	0.00767227	0.009753	0.012312	0.013375
139.68	0.00738218	0.009583	0.012364	0.0133717
139.92	0.00766884	0.009722	0.012268	0.0133037
140.16	0.0076842	0.009565	0.012412	0.0133125
140.4	0.00743153	0.009634	0.011745	0.0131289
140.64	0.00766589	0.009881	0.012738	0.0132929
140.88	0.00756419	0.009687	0.011797	0.0130773
141.12	0.0075981	0.009593	0.012237	0.0131936
141.36	0.00764945	0.009963	0.012108	0.0129068
141.6	0.00764983	0.009684	0.012125	0.0131923
141.84	0.00732351	0.009944	0.012544	0.0133245
142.08	0.00805415	0.009621	0.012277	0.0131944
142.32	0.00753437	0.009709	0.011827	0.0129872
142.56	0.00737538	0.009456	0.012111	0.0131821
142.8	0.00718462	0.009601	0.011821	0.0130756
143.04	0.00742709	0.009947	0.012321	0.0133455
143.28	0.00738825	0.009072	0.012275	0.0132243
143.52	0.00731441	0.009734	0.012342	0.0134848
143.76	0.00719491	0.009563	0.011729	0.0131771
144	0.00737948	0.009732	0.012745	0.0135008
144.24	0.00746052	0.009361	0.012048	0.0127693
144.48	0.00767324	0.009468	0.012362	0.0128127
144.72	0.00778174	0.009267	0.011946	0.0131801
144.96	0.00742495	0.009209	0.012169	0.0131803
145.2	0.00774063	0.00962	0.011977	0.0129597
145.44	0.00724162	0.009329	0.012016	0.0133649
145.68	0.00743681	0.009589	0.012199	0.0129219
145.92	0.00749362	0.009034	0.012208	0.0132567
146.16	0.00761749	0.009276	0.012274	0.0130152
146.4	0.00733696	0.009299	0.012003	0.0130515
146.64	0.00715361	0.009267	0.011967	0.0133146
146.88	0.00706525	0.009373	0.012097	0.0130547
147.12	0.00744838	0.009506	0.011801	0.0131559
147.36	0.00742892	0.009552	0.012084	0.0130469
147.6	0.00761413	0.009407	0.011946	0.0129757
147.84	0.00725935	0.009129	0.012122	0.0130931
148.08	0.00705968	0.009276	0.011961	0.0128963
148.32	0.00761919	0.009348	0.012062	0.0131756
148.56	0.00714144	0.009392	0.012263	0.0127807
148.8	0.00724865	0.009978	0.011882	0.0127813
149.04	0.00748968	0.009712	0.011943	0.0131642
149.28	0.00700084	0.009316	0.011441	0.0126756
149.52	0.00737921	0.009112	0.012435	0.0133464
149.76	0.00715112	0.010014	0.012185	0.012781
150	0.00732262	0.009139	0.012364	0.0127751
150.24	0.00733721	0.009161	0.011535	0.0130929
150.48	0.00761297	0.009927	0.012056	0.0128723
150.72	-0.00317624	-0.00036	-6.5e-05	0.00311245
150.96	0.0334091	0.036626	0.031187	0.0806097
151.2	-0.0570055	-0.0483	-0.05151	-0.0482191
151.44	0.166348	0.148541	0.168926	0.167067
151.68	0.0232399	0.023406	0.027402	0.0287161
151.92	0.00707378	0.009298	0.011974	0.0130758
152.16	0.00718804	0.009558	0.01225	0.0131115
152.4	0.00708728	0.008702	0.011553	0.0128757
152.64	0.00697576	0.008916	0.012071	0.013144
152.88	0.00721002	0.008924	0.011935	0.0130528
153.12	0.00704558	0.009586	0.011895	0.0129408
153.36	0.00723108	0.009533	0.012083	0.0127898
153.6	0.00712142	0.009141	0.012106	0.0130546
153.84	0.00686187	0.009238	0.011503	0.0128092
154.08	0.00696092	0.009453	0.011737	0.012738
154.32	0.00698555	0.009167	0.011983	0.0130888
154.56	0.00723331	0.009366	0.011792	0.0129921
154.8	0.00694655	0.009397	0.012032	0.0134173
155.04	0.00678421	0.008798	0.011865	0.0126959
155.28	0.0074229	0.008813	0.011609	0.0129016
155.52	0.0066816	0.009089	0.011805	0.0127265
155.76	0.00680208	0.009183	0.011772	0.0128973
156	0.00690717	0.0091	0.011909	0.0127485
156.24	0.00650541	0.009277	0.011912	0.0129427
156.48	0.0071706	0.008988	0.011638	0.0128115
156.72	0.00683435	0.008959	0.011241	0.0130337
156.96	0.00705053	0.009604	0.011491	0.0128258
157.2	0.00704146	0.009186	0.011804	0.0128534
157.44	0.00665246	0.008869	0.011307	0.0126
157.68	0.0066923	0.009031	0.011434	0.0127529
157.92	0.00679125	0.008727	0.011069	0.0129564
158.16	0.00689235	0.008854	0.011418	0.0128112
158.4	0.00682501	0.008827	0.011451	0.0126222
158.64	0.00684001	0.009543	0.011615	0.0128746
158.88	0.00703514	0.009292	0.011525	0.0128726
159.12	0.00658971	0.00911	0.01121	0.0128855
159.36	0.00668029	0.009011	0.011725	0.0127761
159.6	0.00674332	0.008995	0.01156	0.0128141
159.84	0.00667194	0.009067	0.011695	0.0128022
160.08	0.00634311	0.009321	0.011247	0.0125759
160.32	0.00654842	0.009046	0.011936	0.0128608
160.56	0.00699106	0.008672	0.011447	0.0127341
160.8	0.00685422	0.00922	0.011212	0.0126883
161.04	0.00688366	0.008745	0.01152	0.0126925
161.28	0.00673666	0.009123	0.011906	0.0127828
161.52	0.00644393	0.00924	0.010932	0.0126039
161.76	0.00675015	0.009051	0.011221	0.0126379
162	0.0066068	0.008959	0.011669	0.0126312
162.24	0.00672495	0.00896	0.011558	0.012593
162.48	0.00627505	0.008732	0.011815	0.012615
162.72	0.00682275	0.009082	0.01174	0.0125676
162.96	0.00660002	0.008917	0.011192	0.0126049
163.2	0.0066986	0.008299	0.011327	0.0125915
163.44	0.00640101	0.008835	0.011116	0.0128006
163.68	0.00662214	0.008836	0.011745	0.0123601
163.92	0.00640034	0.009164	0.011526	0.0127455
164.16	0.0066166	0.008775	0.011404	0.0125
164.4	0.00658043	0.008678	0.011044	0.0126462
164.64	0.00634871	0.009507	0.011583	0.0123623
164.88	0.00620171	0.00903	0.011435	0.0127665
165.12	0.00694656	0.008463	0.011375	0.0125809
165.36	0.0065328	0.008993	0.011257	0.0124185
165.6	0.00684067	0.008744	0.011067	0.0123843
165.84	0.00662863	0.008489	0.01116	0.0123239
166.08	0.00675704	0.008724	0.010958	0.0125747
166.32	0.00643087	0.009226	0.011231	0.0125467
166.56	0.00674362	0.008582	0.011651	0.0120968
166.8	0.00659325	0.008962	0.011376	0.0126682
167.04	0.00650431	0.008875	0.010994	0.012542
167.28	0.00619284	0.008675	0.011649	0.0122782
167.52	0.00712771	0.008764	0.010888	0.0123338
167.76	0.00639195	0.009292	0.0111	0.0125019
168	0.00628236	0.008533	0.011606	0.0123099
168.24	0.00654616	0.009302	0.01149	0.0124301
168.48	0.00661255	0.008876	0.010893	0.0125134
168.72	0.00635218	0.008871	0.011572	0.0123338
168.96	0.00642725	0.008767	0.010932	0.0122679
169.2	0.00639938	0.008738	0.011457	0.0122978
169.44	0.00645508	0.00944	0.011432	0.0123441
169.68	0.00655146	0.008577	0.011499	0.0119246
169.92	0.0065484	0.008376	0.011256	0.0123109
170.16	0.00656246	0.009021	0.011281	0.0121448
170.4	0.00630191	0.008782	0.011157	0.0127112
170.64	0.00636269	0.008766	0.011659	0.0123333
170.88	0.00647684	0.008367	0.01169	0.0124093
171.12	0.00629133	0.00849	0.010938	0.0122649
171.36	0.00648561	0.008843	0.010813	0.0125957
171.6	0.00628265	0.008771	0.011571	0.0124021
171.84	0.00631995	0.008267	0.011551	0.0123469
172.08	0.00672866	0.0088	0.01109	0.0124268
172.32	0.00655948	0.00867	0.011334	0.0121426
172.56	0.00623869	0.008971	0.011105	0.0123035
172.8	0.00668223	0.008755	0.011006	0.0123346
173.04	0.00647041	0.009209	0.01105	0.0122281
173.28	0.00623775	0.009118	0.010884	0.0123964
173.52	0.00650337	0.008462	0.011075	0.0121832
173.76	0.00647429	0.008807	0.010606	0.0122218
174	0.00607171	0.008574	0.011251	0.0122984
174.24	0.00634765	0.008519	0.011174	0.0122066
174.48	0.00633035	0.008654	0.010791	0.0122767
174.72	0.00606792	0.008745	0.011253	0.0123076
174.96	0.00613212	0.008131	0.010396	0.0122128
175.2	0.00618548	0.00822	0.01108	0.0121184
175.44	0.00654568	0.008635	0.010264	0.0122409
175.68	0.00619729	0.008223	0.01113	0.0121035
175.92	0.00636885	0.008717	0.011175	0.0120714
176.16	0.00625255	0.008839	0.010988	0.0122088
176.4	0.006063	0.009185	0.010791	0.012407
176.64	0.00623797	0.008813	0.010882	0.0118772
176.88	0.00625217	0.00871	0.01128	0.0121525
177.12	0.00620097	0.008923	0.010762	0.0120726
177.36	0.00579732	0.008554	0.010904	0.0122345
177.6	0.00625893	0.008304	0.01108	0.0122271
177.84	0.00625163	0.00813	0.010944	0.0117013
178.08	0.00604149	0.008447	0.010527	0.0119235
178.32	0.00594421	0.008781	0.011061	0.0121487
178.56	0.0058918	0.008977	0.010956	0.0119339
178.8	0.00624979	0.008595	0.011578	0.0119311
179.04	0.00611393	0.008226	0.010771	0.0120113
179.28	0.00662848	0.00863	0.011017	0.0120698
179.52	0.00617663	0.008751	0.01106	0.011861
179.76	0.00611255	0.00891	0.011082	0.0118058
180	0.00577008	0.008502	0.010816	0.0117728
180.24	0.00590016	0.008335	0.010981	0.0120546
180.48	0.00629053	0.008803	0.010753	0.0118857
180.72	0.00582465	0.008783	0.010846	0.0118141
180.96	0.00614763	0.008665	0.01081	0.0118404
181.2	0.00637056	0.008334	0.010454	0.0119705
181.44	0.00630882	0.008468	0.010543	0.0121268
181.68	0.00606965	0.008704	0.011052	0.0117043
181.92	0.00616499	0.008068	0.010899	0.0118633
182.16	0.0059459	0.007984	0.01077	0.0118991
182.4	0.0060626	0.008224	0.011049	0.0117508
182.64	0.00600776	0.008524	0.010842	0.0115821
182.88	0.00623323	0.007767	0.010709	0.0118917
183.12	0.00604639	0.008629	0.011075	0.0119556
183.36	0.00600977	0.008669	0.010706	0.0116714
183.6	0.00602609	0.008071	0.01111	0.0118883
183.84	0.00607966	0.008579	0.011093	0.01185
184.08	0.00594132	0.008021	0.010445	0.011836
184.32	0.00591523	0.008492	0.0109	0.0118623
184.56	0.00623168	0.008108	0.010477	0.0120385
184.8	0.005927	0.0083	0.010046	0.0120413
185.04	0.00569782	0.00819	0.010771	0.0120882
185.28	0.00608517	0.008602	0.011106	0.0116618
185.52	0.00595667	0.008312	0.010846	0.0119541
185.76	0.0060887	0.008279	0.010976	0.01184
186	0.00592315	0.008304	0.010699	0.0118926
186.24	0.00626035	0.00856	0.010742	0.0119595
186.48	0.00581866	0.008092	0.01069	0.0118229
186.72	0.00617871	0.0082	0.010556	0.0117161
186.96	0.00583396	0.008688	0.010728	0.0117755
187.2	0.00617372	0.008449	0.010224	0.0116149
187.44	0.00607291	0.00806	0.010517	0.0116758
187.68	0.00590936	0.008338	0.010616	0.0117259
187.92	0.00605583	0.008175	0.010659	0.0117923
188.16	0.00573816	0.007841	0.010606	0.0116277
188.4	0.0058594	0.008023	0.01054	0.0116368
188.64	0.00569035	0.007881	0.010757	0.0117781
188.88	0.00580876	0.008166	0.011132	0.0116758
189.12	0.00586483	0.008184	0.010169	0.011578
189.36	0.00570797	0.008296	0.010913	0.0117151
189.6	0.00583717	0.007893	0.010363	0.0115609
189.84	0.00561437	0.008325	0.010566	0.0116218
190.08	0.00614574	0.008348	0.011182	0.0119658
190.32	0.00547457	0.007814	0.0104	0.0117168
190.56	0.00562979	0.008321	0.010515	0.0114723
190.8	0.00578019	0.008257	0.010813	0.0115008
191.04	0.00602683	0.008146	0.010752	0.0118009
191.28	0.00557764	0.008081	0.010664	0.0117355
191.52	0.00594845	0.007731	0.010596	0.011327
191.76	0.00579448	0.008672	0.0103	0.0118839
192	0.00621175	0.008458	0.010221	0.0118175
192.24	0.00563256	0.008525	0.010914	0.0113503
192.48	0.0059505	0.008564	0.01045	0.0116831
192.72	0.0057472	0.007859	0.01033	0.0114505
192.96	0.00586309	0.007746	0.010378	0.0115634
193.2	0.00574273	0.008256	0.010358	0.0115506
193.44	0.00560842	0.008154	0.010785	0.0116373
193.68	0.00570488	0.008137	0.010127	0.0112923
193.92	0.00550022	0.008267	0.010056	0.0114497
194.16	0.00538315	0.008072	0.010403	0.0115583
194.4	0.00554418	0.007394	0.01038	0.0116449
194.64	0.00574623	0.007845	0.010606	0.0115101
194.88	0.00604875	0.007913	0.010396	0.0113593
195.12	0.00570472	0.007941	0.010211	0.0114588
195.36	0.00573932	0.00857	0.010578	0.0114317
195.6	0.00569313	0.007631	0.010355	0.0114853
195.84	0.00595244	0.008286	0.010014	0.0112289
196.08	0.00597434	0.007793	0.010486	0.0114309
196.32	0.00571773	0.007567	0.010542	0.011244
196.56	0.00573677	0.00821	0.010605	0.0110256
196.8	0.00574901	0.008372	0.010607	0.0116715
197.04	0.00556123	0.008002	0.010458	0.0114415
197.28	0.00565359	0.007817	0.00999	0.0113381
197.52	0.00557027	0.00766	0.010286	0.0114061
197.76	0.00549152	0.007792	0.01051	0.0115851
198	0.00566681	0.008071	0.010831	0.0111842
198.24	0.00544683	0.008081	0.010219	0.0111227
198.48	0.00562109	0.008159	0.010017	0.0114061
198.72	0.00543723	0.007906	0.010439	0.0110378
198.96	0.00567433	0.008047	0.01037	0.01136
199.2	0.00551447	0.007595	0.010355	0.0114257
199.44	0.00570194	0.008007	0.010342	0.0112371
199.68	0.0054062	0.007266	0.010205	0.0114106
199.92	0.00555936	0.007807	0.010884	0.0112218
200.16	0.00575386	0.007823	0.010567	0.011403
200.4	0.00536689	0.007764	0.010373	0.0110843
200.64	0.00561597	0.007792	0.010287	0.0110618
200.88	0.00535553	0.007708	0.011015	0.0111055
201.12	0.0054134	0.007999	0.010456	0.0115709
201.36	0.00546081	0.0077	0.010166	0.0112761
201.6	0.00556468	0.007757	0.010092	0.0111318
201.84	0.0057326	0.008457	0.009626	0.0112866
202.08	0.00545264	0.007651	0.009839	0.0112601
202.32	0.00531641	0.00803	0.010095	0.0113311
202.56	0.00569337	0.007448	0.010377	0.0112305
202.8	0.00578692	0.007895	0.010401	0.0110908
203.04	0.00555826	0.007898	0.010503	0.0113486
203.28	0.00566599	0.007283	0.010088	0.0113222
203.52	0.00559437	0.007608	0.009898	0.0112298
203.76	0.00564451	0.007529	0.010356	0.0112699
204	0.00552261	0.007939	0.010352	0.0110439
204.24	0.00523985	0.00747	0.010508	0.0111155
204.48	0.00516444	0.007669	0.010158	0.0110277
204.72	0.00547813	0.00773	0.009991	0.0113047
204.96	0.00529368	0.007276	0.009532	0.0109284
205.2	0.00538714	0.00741	0.009866	0.0109495
205.44	0.00543195	0.007988	0.009522	0.011051
205.68	0.00549034	0.007398	0.009727	0.0113834
205.92	0.00519787	0.007684	0.010141	0.0110168
206.16	0.00489715	0.008042	0.009453	0.0108608
206.4	0.0053481	0.007508	0.009807	0.0110554
206.64	0.00516317	0.007896	0.01014	0.0112607
206.88	0.00541332	0.008093	0.010523	0.011193
207.12	0.00542416	0.007607	0.010543	0.0110786
207.36	0.00544269	0.008016	0.010088	0.0111266
207.6	0.00524261	0.007332	0.01006	0.011162
207.84	0.0050096	0.007423	0.010131	0.0110703
208.08	0.00531115	0.007472	0.010152	0.0110528
208.32	0.00506687	0.007606	0.010096	0.0109508
208.56	0.00509108	0.007616	0.009949	0.0109567
208.8	0.00511881	0.007396	0.010247	0.0110784
209.04	0.00529185	0.007571	0.010203	0.0108604
209.28	0.00545843	0.007657	0.01018	0.0108538
209.52	0.00503355	0.007719	0.010057	0.0110419
209.76	0.00501383	0.007629	0.009941	0.0109515
210	0.005489	0.007799	0.009827	0.0110018
210.24	0.00520049	0.007387	0.009677	0.010698
210.48	0.00522637	0.007443	0.00955	0.0107695
210.72	0.00507682	0.007616	0.00994	0.0107139
210.96	0.00521991	0.007442	0.009646	0.0109596
211.2	0.00492614	0.007324	0.009949	0.0108089
211.44	0.00523945	0.007673	0.009888	0.0109212
211.68	0.00506774	0.007248	0.009714	0.0105853
211.92	0.00482022	0.007307	0.009717	0.0107358
212.16	0.00506501	0.007411	0.009817	0.0107357
212.4	0.00507435	0.00752	0.010189	0.0109124
212.64	0.00500778	0.007661	0.009745	0.0109973
212.88	0.00533589	0.007525	0.009991	0.0108027
213.12	0.00527031	0.007678	0.01005	0.0109661
213.36	0.00469709	0.007675	0.010305	0.0106576
213.6	0.00518125	0.007426	0.009639	0.0107024
213.84	0.00538438	0.00756	0.010274	0.0108408
214.08	0.00511245	0.007672	0.009428	0.0109491
214.32	0.00522673	0.00758	0.009953	0.0109447
214.56	0.00514496	0.007362	0.009659	0.0108663
214.8	0.0053218	0.007307	0.010039	0.0107233
215.04	0.00522036	0.007542	0.010313	0.0108801
215.28	0.00523167	0.007516	0.009782	0.0107749
215.52	0.00501281	0.007648	0.009872	0.0109861
215.76	0.00481223	0.007273	0.009751	0.0105773
216	0.00524788	0.007281	0.009636	0.0107431
216.24	0.00509177	0.007406	0.009977	0.0107142
216.48	0.00489795	0.007452	0.009862	0.0106249
216.72	0.00536684	0.007651	0.009619	0.010682
216.96	0.00463777	0.007631	0.009916	0.010867
217.2	0.00491264	0.007524	0.009801	0.01037
217.44	0.00472779	0.007614	0.009911	0.0106071
217.68	0.00509625	0.007256	0.009917	0.0106319
217.92	0.00480148	0.007433	0.00963	0.0104326
218.16	0.00515914	0.00719	0.009795	0.0106891
218.4	0.00520224	0.007391	0.009121	0.0106421
218.64	0.00520446	0.007175	0.009726	0.010501
218.88	0.00526944	0.007356	0.009548	0.0105687
219.12	0.00511326	0.00776	0.009845	0.0106829
219.36	0.00499342	0.00737	0.009688	0.010937
219.6	0.00506129	0.007249	0.009903	0.0106994
219.84	0.00474781	0.006748	0.009119	0.0107053
220.08	0.00512193	0.007182	0.009328	0.0106546
220.32	0.00499966	0.007111	0.009981	0.0109633
220.56	0.00514321	0.007406	0.009908	0.0106045
220.8	0.00496337	0.00757	0.009611	0.0103448
221.04	0.00507326	0.007067	0.009172	0.0106988
221.28	0.00513039	0.007327	0.009697	0.0108508
221.52	0.00512001	0.007598	0.009978	0.0107525
221.76	0.00508704	0.007371	0.009667	0.0105766
222	0.00527842	0.007481	0.009611	0.0104467
222.24	0.00469767	0.007078	0.009479	0.0103132
222.48	0.00475516	0.006966	0.010012	0.0105435
222.72	0.00460145	0.007139	0.009526	0.0104899
222.96	0.00499774	0.007415	0.009396	0.0105747
223.2	0.00479164	0.007416	0.009141	0.0104151
223.44	0.00476774	0.007027	0.009903	0.010648
223.68	0.00495554	0.007261	0.009652	0.0103977
223.92	0.0049119	0.0071	0.009277	0.0105395
224.16	0.00480843	0.007044	0.009643	0.0105573
224.4	0.00482011	0.007784	0.009613	0.0105682
224.64	0.00520999	0.00717	0.009681	0.0103673
224.88	0.00478127	0.006821	0.009203	0.0105911
225.12	0.00482766	0.00718	0.009504	0.0106501
225.36	0.00469242	0.0075	0.00961	0.0106179
225.6	0.00473014	0.007202	0.009287	0.0105521
225.84	0.0048586	0.006813	0.009299	0.0106509
226.08	0.00474428	0.007089	0.010054	0.0102113
226.32	0.00442723	0.006839	0.009504	0.0105126
226.56	0.00459775	0.007377	0.00988	0.0104917
226.8	0.00463433	0.006938	0.009346	0.0103685
227.04	0.00453504	0.007059	0.009028	0.0105037
227.28	0.00480323	0.007388	0.009459	0.0105225
227.52	0.00462914	0.006984	0.009401	0.010467
227.76	0.00459882	0.007033	0.009953	0.0102429
228	0.00480385	0.00739	0.009861	0.0101958
228.24	0.00522462	0.007238	0.009788	0.0104397
228.48	0.00457199	0.007067	0.009084	0.0105445
228.72	0.00506986	0.007291	0.009392	0.010226
228.96	0.00475117	0.007085	0.009299	0.0102696
229.2	0.00443763	0.006971	0.009417	0.0101914
229.44	0.00452339	0.00689	0.009705	0.0104366
229.68	0.00441822	0.006953	0.00933	0.0107353
229.92	0.00458164	0.006818	0.009603	0.0103894
230.16	0.00472028	0.007354	0.009492	0.0105029
230.4	0.00481468	0.007295	0.00963	0.0102242
230.64	0.00462707	0.006985	0.009156	0.0101934
230.88	0.00473876	0.007286	0.009506	0.0101844
231.12	0.00487123	0.007005	0.009113	0.0103806
231.36	0.00469493	0.006989	0.008822	0.0102056
231.6	0.00474589	0.007234	0.009382	0.0103652
231.84	0.0043686	0.007375	0.009466	0.0104075
232.08	0.00470967	0.006841	0.009262	0.0101609
232.32	0.00476704	0.006838	0.009307	0.0103867
232.56	0.00449735	0.007032	0.009274	0.0104526
232.8	0.00474723	0.007069	0.008991	0.0101999
233.04	0.00464607	0.006836	0.009409	0.010194
233.28	0.00456168	0.006567	0.00941	0.0101557
233.52	0.00469875	0.007039	0.009236	0.00999501
233.76	0.00469027	0.007345	0.009347	0.0101387
234	0.00494737	0.007044	0.00934	0.0102353
234.24	0.00442225	0.006954	0.009636	0.0102817
234.48	0.00491779	0.007041	0.009456	0.0103271
234.72	0.00454169	0.007277	0.009015	0.0101116
234.96	0.00494449	0.006971	0.009614	0.0100546
235.2	0.00442143	0.007089	0.009429	0.0102632
235.44	0.00455021	0.007206	0.009133	0.0100193
235.68	0.00433173	0.007202	0.009053	0.0100858
235.92	0.00419863	0.007238	0.00944	0.010184
236.16	0.00432015	0.006876	0.009092	0.0100196
236.4	0.00463776	0.006396	0.009158	0.010102
236.64	0.00448883	0.006844	0.009272	0.0103068
236.88	0.00448993	0.006894	0.00923	0.0101133
237.12	0.00458933	0.007238	0.00878	0.00997967
237.36	0.00453009	0.007145	0.00928	0.0100438
237.6	0.00474266	0.007096	0.009137	0.00999513
237.84	0.00464895	0.007016	0.009554	0.00995728
238.08	0.00459235	0.006479	0.009296	0.0101192
238.32	0.00445561	0.006633	0.009515	0.0100282
238.56	0.00478983	0.007016	0.009015	0.0100073
238.8	0.0043827	0.00651	0.00937	0.0102549
239.04	0.00460657	0.006889	0.009512	0.0100216
239.28	0.00437744	0.007092	0.00917	0.00998585
239.52	0.00422795	0.006922	0.009403	0.0097916
239.76	0.00439056	0.006385	0.00883	0.00989569
