# Supplementary material for: Complementary biosensors reveal different G-protein signaling modes triggered by GPCRs and non-receptor activators
Source: eLife. 2021 Mar 31;10:e65620. doi: 10.7554/eLife.65620 (PMC8034979; doi:10.7554/eLife.65620)
Supplement: Figure 2—figure supplement 2—source data 2. [file elife-65620-fig2-figsupp2-data2.xlsx]

## Sheet: GIV GBA
Time	Exp1	Exp2	Exp3
0	0.000133322	-4.5856e-05	0.000151936
0.24	0.000194428	4.54388e-05	0.000131407
0.48	0.000500751	0.000161447	0.000201508
0.72	0.000218168	9.25859e-05	8.53059e-05
0.96	0.00023391	0.000317535	-0.000112255
1.2	0.000223584	0.000201956	0.000101431
1.44	0.000448656	6.88099e-05	-4.13943e-05
1.68	0.000364642	-0.000181888	0.000228496
1.92	0.000189328	8.71665e-05	3.45404e-05
2.16	0.000155163	-0.000126341	-1.2297e-05
2.4	0.000308531	0.000321173	-0.000141963
2.64	0.000202127	9.66924e-05	-0.000156682
2.88	0.000298171	0.000364754	-2.56441e-05
3.12	0.000216391	1.99475e-05	-9.89397e-05
3.36	0.000213438	-6.21688e-05	0.000284181
3.6	-8.40656e-05	-0.000133048	6.89205e-05
3.84	0.000243027	-0.000165089	-4.44452e-05
4.08	0.000184204	-0.000218301	2.81163e-05
4.32	-0.000180203	0.000414244	-8.69902e-05
4.56	0.000173021	0.000307229	0.000223294
4.8	0.000175484	0.000216526	8.78332e-05
5.04	-1.92127e-05	7.16101e-05	-4.73428e-05
5.28	0.000103114	1.82733e-05	-0.000121562
5.52	0.000212769	-0.000271127	7.49584e-05
5.76	0.000250586	0.00028052	7.97542e-06
6	7.64058e-05	-0.000127005	-7.58362e-05
6.24	0.000185956	-0.000189134	0.000261983
6.48	0.00043199	-0.000118367	-2.10207e-05
6.72	0.000259351	-8.53554e-05	5.20275e-05
6.96	5.66504e-05	0.000156729	-0.000228214
7.2	0.000150008	-0.000243494	-0.000172263
7.44	0.000232522	-7.97459e-05	0.000137522
7.68	0.000292281	-1.79053e-05	6.11628e-05
7.92	5.41221e-05	-5.4179e-05	0.000129667
8.16	-0.000169335	-0.000185099	-0.000398909
8.4	0.000217659	-0.00023627	-9.1141e-06
8.64	0.000207243	-0.000502236	-0.000206803
8.88	0.000347217	0.000126673	7.47346e-05
9.12	0.000106798	-0.00027098	0.000152912
9.36	-6.93721e-05	7.87861e-07	0.000237014
9.6	0.000208338	0.000148782	-8.90132e-05
9.84	0.000274706	-0.000321158	-3.78408e-05
10.08	-5.67206e-05	0.000261436	5.61724e-05
10.32	0.00014903	0.000271066	2.60273e-05
10.56	-1.28361e-05	-4.49611e-05	-0.000155743
10.8	0.000205251	-0.000107162	8.77686e-05
11.04	2.61916e-05	-0.000372705	-1.82393e-05
11.28	8.52682e-05	-0.000190097	0.000258696
11.52	0.00014134	9.03137e-05	9.12387e-05
11.76	9.12099e-05	0.000163862	-1.42122e-05
12	-0.000124315	0.000292006	5.85215e-05
12.24	0.000141403	-6.9676e-05	-0.000158691
12.48	0.000241778	7.62625e-05	-4.6507e-05
12.72	-0.000145266	-0.000161215	-2.5998e-05
12.96	-8.57989e-05	0.000277288	0.000119536
13.2	5.83094e-05	-0.000231293	-0.00010941
13.44	-1.48672e-05	-8.78597e-05	-6.05389e-05
13.68	-0.000130481	0.000234653	-0.000142263
13.92	-0.000123651	0.000104647	0.000395591
14.16	0.000205741	0.00029209	-0.000266773
14.4	6.41435e-05	4.53803e-05	0.000107626
14.64	5.80065e-05	7.71535e-05	-8.43024e-05
14.88	7.6101e-05	-0.000235884	-0.000235858
15.12	-9.49901e-05	-9.15072e-05	0.000403242
15.36	-0.000190638	3.79794e-05	0.000118832
15.6	-0.000257344	3.67084e-05	-0.000235103
15.84	0.000111713	0.000185893	-0.000174503
16.08	-3.20253e-05	0.000192441	-0.000289079
16.32	-8.47504e-05	4.6198e-05	0.000320017
16.56	5.29373e-05	-1.65745e-05	-0.000351651
16.8	-0.000191288	-1.65505e-07	0.000112524
17.04	-0.000210788	-6.73568e-05	0.000226598
17.28	0.000206727	-0.000197567	-2.18089e-05
17.52	-4.23284e-05	-6.70429e-05	0.000451826
17.76	-0.000299823	-1.03702e-06	0.000163296
18	-4.69023e-05	-4.04692e-05	3.81731e-05
18.24	-2.01987e-05	-0.000151885	-0.000188347
18.48	-0.000131037	-0.000287461	-0.000174075
18.72	-0.000327904	0.000106046	0.000240545
18.96	-0.000103862	-7.75644e-05	0.000245905
19.2	0.000144672	0.000103538	6.72059e-05
19.44	-0.000169638	3.21643e-05	-0.000128459
19.68	-0.000356169	0.000103976	-0.000153035
19.92	-0.000230196	-9.76316e-05	-2.98937e-05
20.16	-0.000460895	0.00013006	7.94065e-05
20.4	7.08507e-05	0.000221056	0.000121791
20.64	-0.000179411	0.000159914	0.000126866
20.88	-0.000259394	-0.000114127	-0.00016418
21.12	0.000233961	-5.96329e-05	1.34757e-05
21.36	-0.000107678	-0.000649663	-0.000155279
21.6	0.000149465	0.00012305	-0.000351973
21.84	-0.000228976	0.000158716	-8.26923e-05
22.08	0.000120336	-0.000345901	8.81263e-05
22.32	-0.000152364	-5.66473e-05	-0.000129856
22.56	-9.99984e-05	-0.000123813	-1.56742e-05
22.8	-5.48281e-05	0.000228426	0.000224185
23.04	-0.00043172	0.000195428	0.000207747
23.28	-0.000214478	0.000139736	-9.29085e-06
23.52	-0.000197319	-0.000221813	-0.000108448
23.76	-0.00030763	-0.000386867	-4.30001e-06
24	-6.90116e-05	-0.000129649	0.000257538
24.24	-2.83945e-05	9.5847e-05	0.000112663
24.48	-4.67912e-05	0.000257496	-0.000250796
24.72	-0.000295723	-3.59538e-05	-0.000106618
24.96	-0.000261153	6.26627e-05	-0.000225787
25.2	-0.000164397	-5.33465e-05	0.000276193
25.44	-0.000263947	-3.14618e-05	6.77441e-05
25.68	-0.000278969	-8.21291e-05	-0.000141181
25.92	-0.000110241	-4.19447e-05	0.000188144
26.16	-0.000158206	-0.000119442	0.000132306
26.4	4.71485e-05	0.000227477	-0.000289506
26.64	-0.00027056	-7.16405e-06	0.000383899
26.88	-8.53856e-05	0.000207213	-0.000230866
27.12	-0.000180561	-6.65852e-05	-2.61088e-05
27.36	-0.000135664	7.66577e-05	-0.00039844
27.6	-0.000228848	7.19327e-05	6.66101e-05
27.84	-0.000147571	-9.57484e-05	4.1462e-05
28.08	-0.000156569	0.000238402	-0.000225465
28.32	-0.000285457	2.38222e-05	0.000128972
28.56	-0.000306938	-1.82135e-05	-0.000217461
28.8	-1.86252e-05	-2.38943e-05	6.90199e-05
29.04	-0.000258666	-0.00015902	-0.00015462
29.28	0.000104883	9.1328e-05	-0.000113874
29.52	-0.000338141	3.11237e-05	-0.000170756
29.76	-0.00034001	-0.000235456	-0.000226225
30	-0.000466609	-3.49795e-05	0.000131788
30.24	-0.000361634	0.000490462	0.00033592
30.48	-0.000263389	0.000126591	-7.8975e-05
30.72	-0.00825411	-0.00662491	-0.00862845
30.96
31.2	-0.0468154	-0.0394387	-0.0450319
31.44	0.111661	0.0891842	0.0942824
31.68
31.92	-0.000531081	-8.71233e-05	-4.43362e-05
32.16	-0.00072082	-5.52457e-05	-0.000246352
32.4	-0.000462095	-0.000260609	-0.000145023
32.64	-0.000581893	-0.000138311	5.75292e-05
32.88	-0.000685024	-0.000216238	-0.000317111
33.12	-0.00048361	0.000197374	-0.000202617
33.36	-0.000643166	0.000191756	-0.000127556
33.6	-0.000705994	-8.86319e-05	-0.000249869
33.84	-0.000720407	-0.000140448	-0.000103713
34.08	-0.00032193	0.000172824	-0.000291664
34.32	-0.000894073	-7.3148e-05	-8.70073e-05
34.56	-0.000626575	4.52136e-06	-0.00013573
34.8	-0.000563293	-2.00806e-05	-0.000110896
35.04	-0.00073191	-0.000103563	-4.13562e-05
35.28	-0.00076956	0.000136926	-0.000339759
35.52	-0.000884249	-0.000216333	-4.22797e-05
35.76	-0.000927044	-0.000324306	-8.19477e-05
36	-0.000678267	-0.000204175	-5.07595e-05
36.24	-0.000704362	-0.000159124	0.00011958
36.48	-0.000840101	0.00016206	-8.70394e-05
36.72	-0.000812698	-1.66563e-05	-0.000251009
36.96	-0.000835112	-0.000545391	-0.000301862
37.2	-0.000869336	-0.000332446	-0.000280495
37.44	-0.000585857	-8.38572e-05	-0.000571198
37.68	-0.000832913	0.000182608	-0.000155651
37.92	-0.000781008	-0.000314766	-0.000372315
38.16	-0.000883275	5.31705e-05	-0.000388672
38.4	-0.000661343	0.000267939	-0.000433804
38.64	-0.000846532	-6.50447e-06	-6.97341e-07
38.88	-0.00067986	-0.000259995	-0.000559795
39.12	-0.00069129	-3.24305e-05	-0.000386408
39.36	-0.000957642	-0.000100356	-0.000266328
39.6	-0.000955273	4.13034e-06	-0.000477588
39.84	-0.000803552	0.000142233	-0.00029045
40.08	-0.000772349	9.38811e-06	-0.000287145
40.32	-0.000837813	-0.000125811	-0.000355529
40.56	-0.000918474	-0.000311778	-0.000313844
40.8	-0.000649816	-0.00017198	-0.000534057
41.04	-0.00118145	-0.000332377	-0.000350297
41.28	-0.000873857	0.000229099	-8.79991e-05
41.52	-0.000953905	-0.000380276	-1.30405e-05
41.76	-0.00104279	-4.8289e-05	-0.000504153
42	-0.000796373	0.00015006	-0.000282323
42.24	-0.00105713	-0.000251118	-0.000491352
42.48	-0.00104719	-0.000235455	-0.000364551
42.72	-0.000867966	-0.000104803	-0.000292193
42.96	-0.00102841	0.000130167	-0.000640101
43.2	-0.000904309	0.000158286	-0.000696138
43.44	-0.00105161	0.000110407	-0.000192143
43.68	-0.00108494	-0.000300566	-0.000384307
43.92	-0.00107236	-0.000286363	-0.000150171
44.16	-0.00101862	-8.86545e-05	-0.000281428
44.4	-0.00110085	-0.000198255	-0.000484958
44.64	-0.00112065	-0.000246433	-0.00045315
44.88	-0.000960595	6.88147e-05	-0.000371376
45.12	-0.00115255	-0.00018876	-0.000211754
45.36	-0.000954797	0.000283928	-0.000226497
45.6	-0.00108091	0.000242963	-0.000342027
45.84	-0.00113078	5.52865e-05	-0.000405381
46.08	-0.00128714	0.000143572	-0.00039433
46.32	-0.000959591	-0.000158313	-0.000361814
46.56	-0.00118064	8.97284e-05	-0.000393904
46.8	-0.000796262	5.22362e-05	-0.000209334
47.04	-0.000962104	-0.000366586	-0.000152038
47.28	-0.00115206	-0.000107406	-0.000273271
47.52	-0.000993115	-5.25901e-05	-0.000145112
47.76	-0.00127871	-6.69904e-05	-0.00036756
48	-0.00140989	-0.00047048	-0.000369951
48.24	-0.00118496	0.00016264	-0.000519344
48.48	-0.00107344	-0.00026705	-0.000232551
48.72	-0.00101789	-0.0001652	-0.000609162
48.96	-0.00107728	-0.000324439	-0.000657898
49.2	-0.00135954	-0.000158831	-0.000390045
49.44	-0.00123244	-0.000120466	-0.000333104
49.68	-0.00123077	-0.000187488	-2.10903e-05
49.92	-0.00122068	-0.000465759	-0.0004053
50.16	-0.00110146	-0.00014352	-0.000534622
50.4	-0.000985806	-0.000207811	-0.000489115
50.64	-0.00117672	-0.000176704	-0.000641593
50.88	-0.00135824	-0.000232874	-0.000519953
51.12	-0.00148708	-0.000147526	-0.00053497
51.36	-0.00139804	-1.81668e-05	-0.000301448
51.6	-0.00105609	6.7165e-05	-0.000742248
51.84	-0.0012511	-0.000133123	-0.000362317
52.08	-0.00123083	6.94933e-05	-0.000397975
52.32	-0.00117693	0.000377391	-0.000403147
52.56	-0.00110201	0.000254145	-0.000389682
52.8	-0.00123685	3.60848e-05	-0.000392129
53.04	-0.0014487	-0.000481108	-0.000462451
53.28	-0.00115938	-0.000334752	-0.000726138
53.52	-0.0012518	-0.000157901	-0.00062144
53.76	-0.00137311	-0.000238481	-0.000257767
54	-0.001306	-7.06728e-06	-0.000363934
54.24	-0.00108527	-1.01396e-05	-0.000647997
54.48	-0.00156153	0.000123886	-0.000365685
54.72	-0.00134528	-0.00029587	-0.000429249
54.96	-0.00144471	-0.000406523	-0.000718312
55.2	-0.00139755	0.000191448	-0.000492484
55.44	-0.00155371	5.47066e-05	-0.000358632
55.68	-0.00155357	-0.00030274	-0.000678389
55.92	-0.00127894	-0.000535528	-0.000497353
56.16	-0.00132248	-0.000316651	-0.000343038
56.4	-0.00167749	-0.000507845	-0.000867658
56.64	-0.00142205	-0.000282748	-0.000742659
56.88	-0.00143337	-0.000145001	-0.000334737
57.12	-0.00138315	-0.000172276	-0.000451645
57.36	-0.00139271	-0.000321371	-0.000354333
57.6	-0.00151344	-9.95663e-05	-0.00052082
57.84	-0.00150385	-0.000235808	-1.21368e-05
58.08	-0.00150632	-0.000139342	-0.000483978
58.32	-0.00128519	-0.000197208	-0.00048535
58.56	-0.00133036	-0.000334521	-0.000759091
58.8	-0.00130897	-0.000163174	-0.000308547
59.04	-0.0014293	-0.000295162	-0.000660671
59.28	-0.00162611	-0.000441832	-0.00051231
59.52	-0.00149319	-0.000351975	-0.000809942
59.76	-0.00141533	-0.000303052	-0.000522586
60	-0.00147317	-0.000262823	-0.000694984
60.24	-0.0014762	0.000171371	-0.000800597
60.48	-0.00138056	-0.000112635	-0.000534306
60.72	-0.00139061	3.83199e-05	-0.00049871
60.96	-0.00127682	-0.000366749	-0.000347054
61.2	-0.00156779	2.10397e-05	-0.000583124
61.44	-0.00151583	-0.0002751	-0.000312344
61.68	-0.00179222	-3.42869e-06	-0.000754126
61.92	-0.00155593	-8.01827e-05	-0.000668327
62.16	-0.00161715	-0.000449817	-0.000571769
62.4	-0.001326	-8.20996e-05	-0.000763849
62.64	-0.00169877	-0.000186094	-0.000836105
62.88	-0.00142891	0.000257823	-0.000578157
63.12	-0.00169871	-7.74354e-05	-0.000194928
63.36	-0.00172292	5.79617e-05	-0.000288351
63.6	-0.00165328	-0.000115897	-0.000311517
63.84	-0.00159163	-0.000175117	-0.000473165
64.08	-0.00155843	-0.000289391	-0.000703679
64.32	-0.00176089	-0.000218135	-0.000166924
64.56	-0.00180607	-0.000250466	-0.000401971
64.8	-0.00174793	-0.000110074	-0.000633289
65.04	-0.00163943	-8.09337e-05	-0.000510037
65.28	-0.00148533	-0.000208366	-0.000568976
65.52	-0.00135521	-0.000136261	-0.000456522
65.76	-0.00148395	-0.000468725	-0.000817868
66	-0.00179053	-0.000254751	-0.000454067
66.24	-0.0015216	-0.000491449	-0.00073941
66.48	-0.00160287	-0.000443491	-0.000644207
66.72	-0.00127425	-0.000330377	-0.000670926
66.96	-0.00173764	-0.000423988	-0.000878898
67.2	-0.00169199	-0.000394932	-0.000523289
67.44	-0.00133454	-0.000254531	-0.000585688
67.68	-0.00167086	-0.000322544	-0.00088905
67.92	-0.00191472	-4.8016e-05	-0.000479135
68.16	-0.00164725	-0.000867428	-0.000510749
68.4	-0.00173428	-7.25521e-05	-0.000417815
68.64	-0.00172268	-0.000458152	-0.0006227
68.88	-0.00176777	-0.000398494	-0.000662112
69.12	-0.00165651	-0.000137297	-0.000607273
69.36	-0.00167498	-0.000498723	-0.000631802
69.6	-0.00170069	-0.000145468	-0.000784019
69.84	-0.00139291	-8.69087e-05	-0.000621277
70.08	-0.00170591	-5.79796e-05	-0.000565089
70.32	-0.00175515	-7.10473e-05	-0.000730394
70.56	-0.00162168	-0.000430541	-0.000823062
70.8	-0.00139267	-0.000402822	-0.000795111
71.04	-0.00168909	-0.000223585	-0.00037379
71.28	-0.00186595	0.000144868	-0.000746097
71.52	-0.00169347	-0.000638788	-0.000791142
71.76	-0.00190616	-0.000219126	-0.000679216
72	-0.00184624	-0.000202675	-0.000798814
72.24	-0.00158478	-0.000491803	-0.000815249
72.48	-0.00180397	1.09391e-05	-0.000539509
72.72	-0.00180826	-2.46617e-05	-0.000317012
72.96	-0.00184823	-0.000101056	-0.00049365
73.2	-0.00162685	-0.000360019	-0.000329312
73.44	-0.0016408	-0.000480082	-0.000588671
73.68	-0.00187748	-0.000427646	-0.000575586
73.92	-0.00199456	-0.000234132	-0.000603648
74.16	-0.00195827	-3.11605e-05	-0.000587164
74.4	-0.00189185	-0.000667585	-0.000306391
74.64	-0.00180064	-0.000239389	-0.000700896
74.88	-0.00174456	-0.000289273	-0.000753819
75.12	-0.00185585	-0.000406993	-0.000762849
75.36	-0.0019855	-0.00026356	-0.000827416
75.6	-0.00157845	-0.000317758	-0.000463834
75.84	-0.00202115	-0.00033372	-0.000441572
76.08	-0.00191638	-0.000159043	-0.000379735
76.32	-0.00186246	-6.92739e-05	-0.000618249
76.56	-0.00181257	-0.000487105	-0.000539814
76.8	-0.00201249	-0.000531457	-0.000572317
77.04	-0.00176251	-0.000311268	-0.000749967
77.28	-0.00153125	-0.000451452	-0.000722226
77.52	-0.00201443	-0.000314745	-0.000627679
77.76	-0.00204162	-0.000491346	-0.000710038
78	-0.00183017	-0.000116869	-0.000457843
78.24	-0.00171947	-0.000429076	-0.000530964
78.48	-0.00182399	-0.000311366	-0.000824563
78.72	-0.00187025	-0.000322023	-0.000518079
78.96	-0.00208169	-0.000247322	-0.000797112
79.2	-0.00245298	-0.000242986	-0.000242179
79.44	-0.00194454	-0.000325196	-0.000762599
79.68	-0.00202586	-0.000264772	-0.000596266
79.92	-0.00187653	-0.000504796	-0.000730416
80.16	-0.00180748	-0.000572259	-0.00065828
80.4	-0.00191155	-0.000256	-0.000798279
80.64	-0.00204936	-0.000304752	-0.000840335
80.88	-0.0019379	-0.000140578	-0.000879092
81.12	-0.00200081	-0.000373266	-0.000953809
81.36	-0.00196702	-0.000665304	-0.00076754
81.6	-0.00196957	-0.000190355	-0.00060064
81.84	-0.00184114	-0.000383038	-0.00038323
82.08	-0.00209304	-0.000320215	-0.000439138
82.32	-0.00214348	-0.000154402	-0.000610269
82.56	-0.00209838	-0.00051683	-0.000971773
82.8	-0.00214277	-0.000204201	-0.000451235
83.04	-0.00233112	2.36417e-05	-0.00078253
83.28	-0.00196263	-4.04852e-05	-0.00108837
83.52	-0.00220399	-0.000200782	-0.00102732
83.76	-0.00179892	-0.000386215	-0.000966184
84	-0.00200111	0.000238211	-0.000485803
84.24	-0.00207459	-0.000462636	-0.000850353
84.48	-0.00204019	-0.000391861	-0.000856689
84.72	-0.0022563	-0.000269521	-0.000756796
84.96	-0.00209683	-0.000544668	-0.00108904
85.2	-0.00191366	-0.00027901	-0.000982358
85.44	-0.00197987	-0.000168586	-0.000534028
85.68	-0.00220011	-0.000355613	-0.000692031
85.92	-0.00192938	-0.0002679	-0.000637712
86.16	-0.00217636	-0.000520337	-0.000778641
86.4	-0.0018124	-0.000282058	-0.000802556
86.64	-0.00217847	-0.000197283	-0.000676852
86.88	-0.00229228	-5.62401e-05	-0.000343856
87.12	-0.00263737	-6.91565e-05	-0.000811494
87.36	-0.00209978	-0.000342991	-0.000376984
87.6	-0.00193107	-0.000455542	-0.000598573
87.84	-0.00204596	0.000131746	-0.000610376
88.08	-0.00214448	-8.62103e-05	-0.000661302
88.32	-0.002258	-0.000170155	-0.00079473
88.56	-0.00211521	-0.000250499	-0.000915993
88.8	-0.00206655	-0.000509483	-0.000566106
89.04	-0.00229296	-0.000415578	-0.000722217
89.28	-0.00218639	-0.000160434	-0.000863728
89.52	-0.00209262	-3.06904e-05	-0.000879938
89.76	-0.00207663	-0.00013257	-0.000971163
90	-0.0023184	-0.000284136	-0.000602565
90.24	-0.00199823	-0.000303519	-0.000756277
90.48	-0.00203501	-0.000489857	-0.000587552
90.72	-0.00219496	-0.000395182	-0.0012391
90.96	-0.00229623	-0.000262931	-0.00071956
91.2	-0.00239399	-0.000179652	-0.00076844
91.44	-0.00227286	-0.000296259	-0.000750135
91.68	-0.00200316	-0.000488632	-0.000759342
91.92	-0.00203853	-0.000640519	-0.000477501
92.16	-0.00215464	-0.000360463	-0.000815708
92.4	-0.00222341	-0.00042978	-0.000875314
92.64	-0.00233002	-0.000417681	-0.000863631
92.88	-0.00201301	-0.000220461	-0.00103743
93.12	-0.00245001	-0.000364803	-0.000690628
93.36	-0.00226881	-0.000498444	-0.000867895
93.6	-0.0023884	-0.000329821	-0.000592414
93.84	-0.00224646	-0.000404504	-0.000817885
94.08	-0.00228073	-0.000354032	-0.000637139
94.32	-0.00216464	-0.000330692	-0.000756695
94.56	-0.00195669	-0.00018705	-0.000781743
94.8	-0.0023198	-0.000197911	-0.000704078
95.04	-0.00246545	-0.000372553	-0.000885306
95.28	-0.00215233	-0.000302464	-0.000852957
95.52	-0.00227583	-0.000308733	-0.000904388
95.76	-0.00247706	-0.000302679	-0.000866075
96	-0.00231465	-0.00028606	-0.000816251
96.24	-0.00239667	-0.000245289	-0.000950525
96.48	-0.00217928	-0.000458579	-0.000675498
96.72	-0.00230725	-0.000454639	-0.000804089
96.96	-0.00225257	1.10249e-05	-0.00116293
97.2	-0.0022145	-0.00047735	-0.000664489
97.44	-0.00242369	-0.000200606	-0.000624934
97.68	-0.00228542	-0.000311831	-0.000961255
97.92	-0.00245369	-0.00032128	-0.000830187
98.16	-0.002544	-0.000217524	-0.000762826
98.4	-0.00265611	-0.000731726	-0.00089472
98.64	-0.002389	-0.000419986	-0.000674596
98.88	-0.00253382	-0.000353957	-0.00062793
99.12	-0.00228969	-0.000358144	-0.000619398
99.36	-0.00232746	-0.000391361	-0.00088223
99.6	-0.00234793	-0.000734331	-0.000724467
99.84	-0.00258382	-0.000428298	-0.000866495
100.08	-0.00234532	-0.000463037	-0.000892411
100.32	-0.00254107	-0.000317057	-0.000800697
100.56	-0.0026789	-0.000448799	-0.000507518
100.8	-0.00234196	-0.000992005	-0.000891536
101.04	-0.00239148	-0.00039274	-0.000540316
101.28	-0.00242737	-0.000335671	-0.000902923
101.52	-0.00229957	-0.000336623	-0.00105682
101.76	-0.00242538	-0.000347287	-0.000704342
102	-0.00247933	-0.000584511	-0.000659672
102.24	-0.00264074	-0.00029268	-0.000814537
102.48	-0.00240791	-0.000242776	-0.000643563
102.72	-0.00253766	-0.000394487	-0.00102101
102.96	-0.00258237	-0.000297151	-0.000626786
103.2	-0.00255613	-0.000462118	-0.000822692
103.44	-0.00227924	-0.000599285	-0.000723496
103.68	-0.00248412	0.000172541	-0.000835907
103.92	-0.00241801	-0.000542396	-0.000664311
104.16	-0.00221931	-0.000311334	-0.000663648
104.4	-0.00265724	-0.000743948	-0.000913885
104.64	-0.00240191	-0.000576902	-0.000753856
104.88	-0.0023571	-0.000312873	-0.000712946
105.12	-0.00254396	-0.000793124	-0.00102941
105.36	-0.0022863	-8.16563e-05	-0.00068714
105.6	-0.00262567	-0.000269065	-0.000887346
105.84	-0.0024953	-0.000234506	-0.000879773
106.08	-0.00262376	0.00025273	-0.000915181
106.32	-0.00231948	-0.000558091	-0.00108614
106.56	-0.00242772	-5.41391e-05	-0.00127992
106.8	-0.00271137	-0.00033687	-0.000874806
107.04	-0.00241733	-0.000443234	-0.000956591
107.28	-0.00248558	-0.000269197	-0.000598814
107.52	-0.00235558	-0.000493724	-0.000839905
107.76	-0.00259072	-9.38778e-05	-0.000870181
108	-0.00260286	-0.000730532	-0.000758213
108.24	-0.0025571	-0.000321905	-0.000932691
108.48	-0.002787	-0.000170491	-0.000946433
108.72	-0.00252737	-0.000381003	-0.000717237
108.96	-0.00257464	-0.000271971	-0.000648883
109.2	-0.00254104	-5.99375e-05	-0.000773947
109.44	-0.002486	-0.000290086	-0.00077745
109.68	-0.00277635	-0.000244659	-0.000942201
109.92	-0.0024519	-0.000730156	-0.00104929
110.16	-0.0024494	9.43071e-06	-0.000904718
110.4	-0.0026731	-0.000322652	-0.000975888
110.64	-0.00256149	-0.000264462	-0.000584306
110.88	-0.00270918	-0.000304023	-0.000978024
111.12	-0.00255857	-0.000619661	-0.000929566
111.36	-0.00250005	-0.000361097	-0.000607844
111.6	-0.00247032	-0.000399247	-0.000900881
111.84	-0.00269074	-8.93031e-07	-0.000804712
112.08	-0.00256686	0.0002114	-0.000838833
112.32	-0.00277647	-3.74746e-05	-0.000948976
112.56	-0.00265518	-0.000726846	-0.00103022
112.8	-0.00283918	-0.000513371	-0.000767197
113.04	-0.0025166	-0.000705036	-0.000939713
113.28	-0.00257417	-0.000376834	-0.000761572
113.52	-0.00267997	-0.000346287	-0.00102176
113.76	-0.00273904	-0.000271353	-0.000912944
114	-0.0026054	-0.0006266	-0.000937086
114.24	-0.00270491	-0.000633987	-0.000934424
114.48	-0.00280028	-0.000111841	-0.000699995
114.72	-0.00294479	-5.45195e-05	-0.000836869
114.96	-0.00267229	-0.000521339	-0.000762008
115.2	-0.00266593	-9.22301e-05	-0.000444006
115.44	-0.00267813	-0.000392038	-0.00094228
115.68	-0.00246582	-0.000312368	-0.00109577
115.92	-0.00298752	-0.000601051	-0.000959513
116.16	-0.00268801	-0.000603301	-0.000873259
116.4	-0.00295869	-0.000374729	-0.000991818
116.64	-0.00271344	-0.000445348	-0.000771031
116.88	-0.00272374	-2.71043e-05	-0.000814047
117.12	-0.00282971	-0.000416725	-0.00100547
117.36	-0.00280956	-0.000180268	-0.000722452
117.6	-0.00277098	1.64441e-05	-0.000897907
117.84	-0.00270399	-0.000506526	-0.000703756
118.08	-0.00265726	-0.000595319	-0.000982897
118.32	-0.00288229	-0.000527127	-0.00111165
118.56	-0.00279702	-0.000430258	-0.001126
118.8	-0.00266754	-0.000149549	-0.000982252
119.04	-0.00260695	-0.00041007	-0.000465614
119.28	-0.00280856	-0.000211538	-0.000966807
119.52	-0.0030622	-0.000488782	-0.000552309
119.76	-0.00246422	-9.94194e-05	-0.000626846
120	-0.00282363	-0.000142089	-0.00108695
120.24	-0.00260304	-0.00066525	-0.00101398
120.48	-0.00272676	-0.000273029	-0.000951415
120.72	-0.00287144	-0.000344801	-0.000531144
120.96	-0.00287551	-0.00080877	-0.000914718
121.2	-0.00267644	-0.000534095	-0.000776848
121.44	-0.00275668	-0.000618873	-0.0011737
121.68	-0.00291401	-0.000355034	-0.000930414
121.92	-0.00296218	-0.000283344	-0.000769793
122.16	-0.00304513	-0.000524318	-0.000991987
122.4	-0.00285468	-0.00043567	-0.000951384
122.64	-0.00286191	-0.000302181	-0.000834375
122.88	-0.00280414	-0.000316278	-0.00099489
123.12	-0.00285151	-0.000646718	-0.000997817
123.36	-0.00269262	-0.000435403	-0.000866813
123.6	-0.0028859	-5.03704e-05	-0.000820893
123.84	-0.00290761	-0.000471597	-0.0011092
124.08	-0.00320816	-0.000562212	-0.000694403
124.32	-0.00280907	-0.000404423	-0.000701502
124.56	-0.0030566	-0.0004579	-0.000885303
124.8	-0.00286944	-0.000469712	-0.000784529
125.04	-0.00261826	-0.000194489	-0.000931631
125.28	-0.0031083	-0.00059121	-0.000900117
125.52	-0.00292511	-0.000398611	-0.00129471
125.76	-0.00304502	-0.000326852	-0.000982958
126	-0.0028482	-0.00029219	-0.000840897
126.24	-0.00289976	-0.00011637	-0.000545718
126.48	-0.00297	-0.000152399	-0.00108232
126.72	-0.00272048	-0.000259935	-0.00102366
126.96	-0.00304616	-0.000374395	-0.000908783
127.2	-0.00299357	-0.00053918	-0.00108221
127.44	-0.00304414	-0.000300118	-0.000538021
127.68	-0.00304297	-0.000507218	-0.000994392
127.92	-0.00279153	-0.000315092	-0.00102257
128.16	-0.00293286	-0.000188734	-0.00113161
128.4	-0.00314977	-0.000161853	-0.00111416
128.64	-0.00281703	-0.000667041	-0.00111929
128.88	-0.00286137	-0.000433961	-0.000854151
129.12	-0.00279642	-0.000367398	-0.00105882
129.36	-0.00298455	-0.000272019	-0.000832845
129.6	-0.0028642	-0.000604159	-0.00103852
129.84	-0.00321904	-0.000506525	-0.00111993
130.08	-0.0027775	-0.000585521	-0.00101966
130.32	-0.00304703	-0.000318011	-0.00104502
130.56	-0.00287381	-0.000916232	-0.00137599
130.8	-0.00299328	-0.000383979	-0.00114461
131.04	-0.00298647	-0.000159341	-0.000891018
131.28	-0.0031096	-0.000422573	-0.00101951
131.52	-0.00330011	-0.000264115	-0.000854802
131.76	-0.00298717	-0.000578397	-0.00102828
132	-0.00315463	-5.69345e-05	-0.000894312
132.24	-0.0030856	-0.000397265	-0.000881604
132.48	-0.00293063	-0.000643134	-0.000899924
132.72	-0.00330925	-0.000621306	-0.000891922
132.96	-0.00319701	-0.000469502	-0.000841776
133.2	-0.00332082	-0.000510001	-0.00108933
133.44	-0.00306101	-0.000320138	-0.00118827
133.68	-0.00313767	-0.00042894	-0.00127845
133.92	-0.00354297	-0.000826742	-0.00127129
134.16	-0.00287873	-0.000429916	-0.0011526
134.4	-0.00299493	-0.000554032	-0.00104057
134.64	-0.00315841	-0.000149945	-0.00116935
134.88	-0.00307141	-0.000771403	-0.000903891
135.12	-0.00307342	-0.00069973	-0.000789381
135.36	-0.00295501	-0.000472942	-0.00115988
135.6	-0.00316381	-0.00041825	-0.00110667
135.84	-0.00293499	-0.000476391	-0.00114311
136.08	-0.00322202	-0.000640068	-0.000902815
136.32	-0.00280188	-0.000482102	-0.000910107
136.56	-0.00310953	-0.000438673	-0.000936649
136.8	-0.00302599	-0.000190753	-0.00147541
137.04	-0.00318465	-0.000573165	-0.00121168
137.28	-0.00319037	-0.000610369	-0.00117154
137.52	-0.00319286	-0.00050359	-0.00105701
137.76	-0.00308988	-0.000437191	-0.00104013
138	-0.00316483	-0.000166276	-0.000882171
138.24	-0.00303151	-0.00070601	-0.000965678
138.48	-0.00311125	-0.000850508	-0.00106223
138.72	-0.00340781	-0.000416391	-0.000987373
138.96	-0.00312698	-0.000302968	-0.00104892
139.2	-0.00299222	-0.000171772	-0.000941511
139.44	-0.00337414	-0.000601217	-0.00112769
139.68	-0.00324986	-0.000588368	-0.000931918
139.92	-0.00315571	-0.000251452	-0.00122774
140.16	-0.00355229	-0.000502742	-0.00100843
140.4	-0.00320348	-0.000288369	-0.000986667
140.64	-0.00339101	-0.000332964	-0.00120734
140.88	-0.0031922	-0.000437498	-0.00113349
141.12	-0.00323429	-0.000403944	-0.00104364
141.36	-0.00294917	-0.000606156	-0.000929374
141.6	-0.0033944	-0.000808541	-0.000939048
141.84	-0.00326046	-0.000318421	-0.000964623
142.08	-0.00323677	-0.000229399	-0.000722565
142.32	-0.00322369	-0.000578356	-0.00126444
142.56	-0.00331811	-0.000628794	-0.00117228
142.8	-0.00316851	-0.000378218	-0.000954996
143.04	-0.00321371	-0.000324617	-0.000923253
143.28	-0.00319057	-0.000505682	-0.000979854
143.52	-0.00335498	-0.000666092	-0.00116057
143.76	-0.0032204	-0.000109909	-0.000917699
144	-0.003032	-0.000669108	-0.000761223
144.24	-0.00342407	-0.000760574	-0.000943026
144.48	-0.00322182	-0.000452961	-0.000864539
144.72	-0.00350313	-0.000496817	-0.00081919
144.96	-0.00310889	-0.00043146	-0.00107926
145.2	-0.00338668	-0.000638975	-0.00105502
145.44	-0.00340365	-0.00041999	-0.00124938
145.68	-0.00342299	-0.000447132	-0.00114811
145.92	-0.00329204	-0.000620211	-0.000970478
146.16	-0.00342243	-0.000436114	-0.000977377
146.4	-0.00309087	-0.000329465	-0.00132327
146.64	-0.00319885	-0.00031146	-0.00107189
146.88	-0.00345019	-0.00056258	-0.00102409
147.12	-0.00346082	-0.000823076	-0.000575411
147.36	-0.00337416	-0.000115373	-0.00109231
147.6	-0.00349195	-0.00071068	-0.00124417
147.84	-0.00366548	-0.000602847	-0.00128211
148.08	-0.00331082	-0.000606043	-0.00102712
148.32	-0.00333918	-0.000314534	-0.0011202
148.56	-0.00328077	-0.000359448	-0.000982169
148.8	-0.00336841	5.00449e-05	-0.00126178
149.04	-0.00354816	-0.000507793	-0.00108714
149.28	-0.00355674	-0.000480413	-0.00106069
149.52	-0.00331957	-0.000327792	-0.00134457
149.76	-0.00343558	-0.000781189	-0.00113116
150	-0.00350208	-0.00027897	-0.000957507
150.24	-0.00337929	0.000100232	-0.000744713
150.48	-0.00300558	-0.000222499	-0.000386803
150.72	-0.010454	-0.00660329	-0.00922595
150.96	0.0265862	0.0329814	-0.0511509
151.2	-0.0471891	-0.0392642	-0.0435223
151.44	0.114761	0.0967961	0.103943
151.68	0.00943277	0.011158	0.0109115
151.92	-0.00264461	0.00126091	0.00114989
152.16	-0.00231744	0.00114629	0.0013727
152.4	-0.00206639	0.00156791	0.00162078
152.64	-0.0021571	0.00175519	0.00157666
152.88	-0.00205445	0.00205921	0.00197151
153.12	-0.0021099	0.00207442	0.00188386
153.36	-0.00202564	0.00231868	0.00233964
153.6	-0.0017944	0.0023256	0.0024086
153.84	-0.00176404	0.00260352	0.00252344
154.08	-0.00170262	0.00267308	0.00282411
154.32	-0.00112927	0.00297777	0.00288733
154.56	-0.00147637	0.00310038	0.00284331
154.8	-0.00142653	0.00315346	0.00315106
155.04	-0.00146009	0.00341757	0.00315609
155.28	-0.00117422	0.00363428	0.00352444
155.52	-0.00112795	0.00371751	0.0032577
155.76	-0.00115487	0.00373066	0.00362064
156	-0.000947842	0.00411945	0.0034961
156.24	-0.000862476	0.00416648	0.00335335
156.48	-0.000951543	0.00418459	0.00351615
156.72	-0.00064928	0.00418129	0.0038521
156.96	-0.000487777	0.00448941	0.00385786
157.2	-0.000624127	0.00448923	0.00420098
157.44	-0.000546026	0.0043145	0.00416119
157.68	-0.000331191	0.00472228	0.00423634
157.92	-0.000473407	0.00452773	0.00429637
158.16	-0.000268326	0.00470553	0.00412172
158.4	-0.000117725	0.00428568	0.00455605
158.64	-0.000393211	0.00505535	0.0042683
158.88	-0.000290155	0.00462831	0.00466526
159.12	-0.000362967	0.00521684	0.00486871
159.36	-8.83793e-05	0.00509353	0.00462408
159.6	-0.000204292	0.00515016	0.00477696
159.84	-9.11155e-05	0.00464802	0.00446798
160.08	-5.58309e-05	0.00532999	0.00467778
160.32	0.000112246	0.00515956	0.00509964
160.56	8.44667e-05	0.00546973	0.0046367
160.8	0.000461924	0.00564989	0.00496893
161.04	0.000234795	0.00544445	0.00492259
161.28	0.000575385	0.00550422	0.00496992
161.52	0.00043282	0.00604135	0.00546068
161.76	0.000539612	0.00577076	0.0049072
162	0.000382335	0.0056013	0.00561084
162.24	0.000556359	0.00570421	0.00523452
162.48	0.000623619	0.00568282	0.0052511
162.72	0.000828926	0.00625295	0.0054803
162.96	0.000691533	0.00564464	0.00517354
163.2	0.000676018	0.00584579	0.0053782
163.44	0.000578149	0.00598434	0.00556426
163.68	0.000983907	0.00618961	0.00526086
163.92	0.0009245	0.00616398	0.0055105
164.16	0.00088018	0.00590005	0.00526493
164.4	0.000849896	0.00635951	0.00559078
164.64	0.000706409	0.00640841	0.0054016
164.88	0.000863095	0.00629637	0.00569763
165.12	0.00088587	0.00609477	0.00571838
165.36	0.000765982	0.00646489	0.00570981
165.6	0.00105173	0.00660827	0.00595357
165.84	0.00123848	0.00604707	0.00574439
166.08	0.000798304	0.006383	0.00598152
166.32	0.00117205	0.00647392	0.00571447
166.56	0.00105174	0.00707799	0.005898
166.8	0.00134286	0.00664969	0.00601852
167.04	0.00122055	0.0069498	0.00590972
167.28	0.00103218	0.00664463	0.00598042
167.52	0.00107986	0.00682602	0.00634541
167.76	0.001102	0.00691712	0.00633327
168	0.000775797	0.00649515	0.0060508
168.24	0.00112417	0.00709035	0.0061368
168.48	0.00148013	0.00696077	0.00616362
168.72	0.00142835	0.00692006	0.00625616
168.96	0.00157971	0.00708466	0.00628634
169.2	0.0011492	0.00718487	0.00634043
169.44	0.00138697	0.00711737	0.0064081
169.68	0.00140626	0.00692347	0.0066763
169.92	0.00164907	0.00721218	0.00630012
170.16	0.00112967	0.0076015	0.0067896
170.4	0.00135314	0.007335	0.00657663
170.64	0.00131314	0.00733866	0.00628766
170.88	0.00157284	0.00709933	0.00672057
171.12	0.00141636	0.00767469	0.00679244
171.36	0.00168737	0.00754866	0.00631885
171.6	0.0016147	0.00746427	0.00695959
171.84	0.00153246	0.00771068	0.00681667
172.08	0.00141717	0.00722939	0.00685323
172.32	0.00176127	0.00761222	0.00698994
172.56	0.00187043	0.00718414	0.00662988
172.8	0.0016289	0.00731067	0.00697823
173.04	0.00157783	0.00804271	0.00713193
173.28	0.00178148	0.00740024	0.00653902
173.52	0.00167134	0.0079372	0.00666329
173.76	0.00174161	0.00767045	0.0070403
174	0.00196706	0.00768968	0.00706702
174.24	0.00194122	0.00773238	0.00690088
174.48	0.00175706	0.00830449	0.00686744
174.72	0.00178693	0.0077533	0.00689763
174.96	0.00192171	0.00803063	0.00698852
175.2	0.00184159	0.00803248	0.0073023
175.44	0.00185753	0.00790142	0.00708594
175.68	0.00182998	0.00786347	0.00684676
175.92	0.00191546	0.00831671	0.00724529
176.16	0.00188467	0.00792038	0.00755068
176.4	0.00191722	0.00780165	0.00719722
176.64	0.00180728	0.00787321	0.00731024
176.88	0.00184138	0.0078619	0.00713932
177.12	0.00188225	0.0078235	0.00740683
177.36	0.0020189	0.00847401	0.00718617
177.6	0.00198986	0.00804044	0.00766954
177.84	0.00205217	0.00829501	0.00770633
178.08	0.00176197	0.00825755	0.00777415
178.32	0.0018416	0.00835069	0.00736714
178.56	0.00193018	0.00849966	0.00737517
178.8	0.00191839	0.00811597	0.00757311
179.04	0.00198926	0.00865372	0.00770798
179.28	0.00192209	0.00822263	0.0073363
179.52	0.00190837	0.00858814	0.00779369
179.76	0.00217804	0.0079313	0.00760503
180	0.00200064	0.00862853	0.0077385
180.24	0.00216689	0.00838405	0.00808558
180.48	0.00208136	0.00863553	0.00783209
180.72	0.002051	0.00859599	0.00800471
180.96	0.00191934	0.00872976	0.00765629
181.2	0.00193685	0.00860121	0.00787522
181.44	0.0021113	0.00877172	0.00780054
181.68	0.00211902	0.00877213	0.00805368
181.92	0.00215043	0.00864947	0.00756941
182.16	0.00240445	0.0087521	0.00804446
182.4	0.00191484	0.00882125	0.00796816
182.64	0.00228518	0.00878105	0.00812971
182.88	0.00216082	0.00840649	0.00768822
183.12	0.00191422	0.00885646	0.0077777
183.36	0.00211517	0.00870636	0.00815734
183.6	0.00210353	0.00905466	0.00769973
183.84	0.00242119	0.00871958	0.00782145
184.08	0.00264121	0.00880833	0.00838211
184.32	0.00194018	0.00882489	0.00817453
184.56	0.0021571	0.0089343	0.00801234
184.8	0.00237057	0.00869013	0.00788303
185.04	0.00214927	0.00886049	0.00800188
185.28	0.00242709	0.00894063	0.00810995
185.52	0.00220817	0.00855612	0.00827551
185.76	0.00225753	0.00861282	0.00815419
186	0.00234943	0.00918126	0.00794296
186.24	0.002455	0.00904822	0.00809822
186.48	0.00181685	0.00890391	0.00807387
186.72	0.00250801	0.00908125	0.00796725
186.96	0.00211078	0.00873067	0.00840729
187.2	0.00228491	0.00899209	0.00828261
187.44	0.00246844	0.00893244	0.00799719
187.68	0.00221357	0.00862071	0.00818768
187.92	0.001773	0.00901348	0.00814649
188.16	0.00231548	0.00902334	0.00825661
188.4	0.0022639	0.00864326	0.0082046
188.64	0.0026491	0.00935682	0.00859575
188.88	0.00227668	0.00958564	0.00826457
189.12	0.00213764	0.00907709	0.00835788
189.36	0.00242174	0.00926945	0.00842129
189.6	0.00220461	0.00901196	0.00818956
189.84	0.00253048	0.00961657	0.00862648
190.08	0.00230351	0.00935463	0.00834396
190.32	0.00239892	0.00925311	0.00850111
190.56	0.00248561	0.00902029	0.00814563
190.8	0.00260605	0.00898681	0.00860107
191.04	0.00221071	0.0090518	0.00858047
191.28	0.00241447	0.008938	0.00844014
191.52	0.00237582	0.00902016	0.00855691
191.76	0.0022537	0.00911247	0.00842927
192	0.00224351	0.00872562	0.00853976
192.24	0.0026685	0.00910775	0.00824082
192.48	0.00256002	0.00960743	0.00853218
192.72	0.00292211	0.00926804	0.00845396
192.96	0.00247356	0.00933227	0.00840464
193.2	0.00238707	0.00908205	0.00852767
193.44	0.00243235	0.00949831	0.00839618
193.68	0.00249554	0.0093191	0.00814457
193.92	0.00247335	0.00935295	0.00880154
194.16	0.00211	0.00990341	0.00838569
194.4	0.00261582	0.00957368	0.00848416
194.64	0.00221506	0.00952878	0.00854467
194.88	0.00234035	0.0093547	0.0087503
195.12	0.00250238	0.00966487	0.00870797
195.36	0.00259956	0.00929376	0.00858845
195.6	0.00230416	0.00966119	0.00917369
195.84	0.00249027	0.00939552	0.00862081
196.08	0.00246113	0.00948706	0.00871881
196.32	0.00265434	0.00962777	0.00863901
196.56	0.00247294	0.00944515	0.00838148
196.8	0.00247292	0.00930305	0.00860099
197.04	0.00227128	0.00940119	0.0090521
197.28	0.00208113	0.00952014	0.00868782
197.52	0.00252193	0.00962348	0.00856182
197.76	0.00209432	0.00964044	0.00878987
198	0.00250002	0.00959076	0.00886985
198.24	0.00234588	0.0097322	0.00881037
198.48	0.00237589	0.00939015	0.00869964
198.72	0.00257119	0.00971419	0.00879794
198.96	0.00264697	0.00977186	0.00889313
199.2	0.00226823	0.00943152	0.00869633
199.44	0.00234981	0.00967958	0.00875336
199.68	0.00269058	0.00964751	0.00880999
199.92	0.00247163	0.00962319	0.00873783
200.16	0.00241532	0.00957909	0.00868936
200.4	0.00248251	0.00936516	0.00872852
200.64	0.00258572	0.00941556	0.00922869
200.88	0.00230169	0.00972481	0.00905149
201.12	0.00236287	0.00972087	0.00861033
201.36	0.00245247	0.00995973	0.00883266
201.6	0.00246625	0.0097482	0.0086282
201.84	0.00243949	0.00945793	0.00900212
202.08	0.00263494	0.0098982	0.008751
202.32	0.00262054	0.00939762	0.0090469
202.56	0.00254245	0.00976027	0.00899812
202.8	0.00250408	0.00953394	0.00896881
203.04	0.00215642	0.00968755	0.00868248
203.28	0.0023049	0.00943861	0.00897956
203.52	0.00235967	0.00959358	0.00900047
203.76	0.00256658	0.0098245	0.00921212
204	0.00233335	0.00974323	0.00879445
204.24	0.00257967	0.00985903	0.00912964
204.48	0.0024856	0.0096739	0.00895452
204.72	0.00248144	0.0093599	0.00902394
204.96	0.00256147	0.00967249	0.00910789
205.2	0.00233979	0.00975137	0.00864357
205.44	0.00230862	0.0104523	0.00873341
205.68	0.002764	0.0095048	0.00885354
205.92	0.00245104	0.0097253	0.00869229
206.16	0.00242433	0.0100593	0.00877173
206.4	0.00253286	0.00967662	0.00909037
206.64	0.00243117	0.00965237	0.0089974
206.88	0.00243547	0.0100538	0.00862813
207.12	0.00244555	0.00977492	0.00905768
207.36	0.00252768	0.0101815	0.00908332
207.6	0.00235933	0.00945535	0.00892922
207.84	0.00223508	0.00948592	0.0086194
208.08	0.00254696	0.00983283	0.00886731
208.32	0.00244852	0.00996886	0.00911856
208.56	0.00226986	0.00974764	0.00924349
208.8	0.00233745	0.00978809	0.00898179
209.04	0.00236919	0.0100639	0.00936415
209.28	0.00244524	0.0100356	0.00914076
209.52	0.00223551	0.0101235	0.00873869
209.76	0.00242374	0.00998283	0.00894512
210	0.00247028	0.0102445	0.00914753
210.24	0.00280369	0.00983958	0.00938092
210.48	0.00252137	0.00991027	0.00920336
210.72	0.00223929	0.00985527	0.0091738
210.96	0.00247096	0.0097969	0.00893906
211.2	0.00247805	0.00948095	0.00911224
211.44	0.00253902	0.00982051	0.00928643
211.68	0.00262312	0.0100129	0.00903488
211.92	0.00245098	0.0100139	0.00922286
212.16	0.00209516	0.00995853	0.00906633
212.4	0.00243105	0.00986914	0.00945805
212.64	0.00264491	0.0100873	0.0091132
212.88	0.0022527	0.0100639	0.00891846
213.12	0.00254447	0.0100751	0.00961427
213.36	0.00218096	0.00980751	0.00926474
213.6	0.00262181	0.010214	0.00913435
213.84	0.00228085	0.0100798	0.00900562
214.08	0.00242494	0.00974249	0.0091578
214.32	0.00233078	0.00973639	0.00880184
214.56	0.00212589	0.0104582	0.00879444
214.8	0.00232145	0.00989299	0.00943745
215.04	0.00248143	0.00973029	0.00914628
215.28	0.00234049	0.0102771	0.00931294
215.52	0.00227554	0.0098437	0.00922925
215.76	0.00245271	0.00998794	0.00899277
216	0.00220025	0.00991337	0.00939532
216.24	0.00216286	0.0101987	0.00899784
216.48	0.00254672	0.00978373	0.00936059
216.72	0.00239828	0.0101163	0.00941331
216.96	0.00256603	0.0102689	0.00908939
217.2	0.00240416	0.0100831	0.00913685
217.44	0.00242815	0.0103711	0.00895305
217.68	0.00222265	0.0100916	0.00912905
217.92	0.00245066	0.0102923	0.00893778
218.16	0.00235668	0.0105143	0.00923329
218.4	0.00239252	0.0101956	0.00934835
218.64	0.00242978	0.010224	0.00894943
218.88	0.00216722	0.0105474	0.00913149
219.12	0.0026447	0.0100032	0.00915521
219.36	0.00238676	0.00986559	0.00906032
219.6	0.00236767	0.0103992	0.00927301
219.84	0.00250405	0.0101587	0.00947029
220.08	0.00240101	0.0103177	0.00928763
220.32	0.00230839	0.00999644	0.00908682
220.56	0.00262314	0.0103784	0.00906939
220.8	0.00229719	0.0104499	0.00920151
221.04	0.0024102	0.0102302	0.00869511
221.28	0.0025503	0.0102371	0.0094749
221.52	0.00252437	0.0101753	0.00940551
221.76	0.00266937	0.00999072	0.00957709
222	0.00231127	0.00995466	0.0093071
222.24	0.00237348	0.0100566	0.00937692
222.48	0.00236086	0.0101926	0.00913488
222.72	0.0022497	0.00998961	0.00925532
222.96	0.00261453	0.0100323	0.00953513
223.2	0.00250544	0.0101227	0.00904175
223.44	0.00233091	0.0102075	0.00916154
223.68	0.0025539	0.00987931	0.00932247
223.92	0.00240455	0.0100595	0.00908846
224.16	0.00238865	0.009958	0.00930187
224.4	0.00232496	0.00987916	0.00900322
224.64	0.00247138	0.0101592	0.00923651
224.88	0.0024455	0.00968963	0.00942199
225.12	0.00233993	0.0101164	0.0092001
225.36	0.00216766	0.00971759	0.00955402
225.6	0.00207603	0.0102032	0.00968375
225.84	0.00209486	0.0098198	0.00917451
226.08	0.00234553	0.0102763	0.00914924
226.32	0.00223407	0.0104216	0.00917484
226.56	0.00230883	0.0100393	0.00895709
226.8	0.00251354	0.0101337	0.00944437
227.04	0.00229585	0.0100802	0.00936393
227.28	0.00237771	0.0101777	0.00899269
227.52	0.00218548	0.00989205	0.0091929
227.76	0.00234914	0.0101715	0.00955589
228	0.00237806	0.0103915	0.00939138
228.24	0.00231697	0.00981799	0.00932502
228.48	0.00233613	0.0102144	0.00935448
228.72	0.00214703	0.0101528	0.00918848
228.96	0.00227332	0.0101777	0.00940568
229.2	0.00226527	0.00986062	0.00934785
229.44	0.00239688	0.00981975	0.00965399
229.68	0.00221356	0.0103901	0.00957582
229.92	0.00254195	0.00987884	0.00916914
230.16	0.00215398	0.00943744	0.00923944
230.4	0.00233756	0.00995428	0.00937481
230.64	0.00224053	0.0103715	0.00938803
230.88	0.00235802	0.010035	0.00911358
231.12	0.00204032	0.00988594	0.00884557
231.36	0.00230806	0.00978956	0.00936677
231.6	0.00213876	0.00974124	0.00928258
231.84	0.00242049	0.0100219	0.00966367
232.08	0.00199376	0.0100895	0.0091557
232.32	0.00231961	0.0100124	0.00935729
232.56	0.00246754	0.00974764	0.0091908
232.8	0.00193908	0.0102326	0.00928022
233.04	0.00226954	0.0103214	0.00939416
233.28	0.00226001	0.00993152	0.00938289
233.52	0.00225207	0.0105134	0.00957414
233.76	0.00211852	0.0100662	0.00984746
234	0.00221005	0.00978583	0.00903066
234.24	0.00232214	0.0106304	0.00913353
234.48	0.00209049	0.0103048	0.00921417
234.72	0.00198923	0.0099793	0.00917774
234.96	0.0022528	0.00991548	0.00946137
235.2	0.00214866	0.0102033	0.00895865
235.44	0.00215521	0.0102904	0.00927519
235.68	0.00206967	0.0101413	0.0094542
235.92	0.00226031	0.00976977	0.00947084
236.16	0.00214858	0.0102429	0.00944439
236.4	0.00224301	0.0102944	0.00894406
236.64	0.00186999	0.0100629	0.00932049
236.88	0.00192314	0.0101117	0.00966314
237.12	0.00215055	0.0101808	0.00954878
237.36	0.00236603	0.0100439	0.00949441
237.6	0.00220627	0.00980049	0.00937376
237.84	0.00197407	0.0104637	0.00959133
238.08	0.00205601	0.0101613	0.00957905
238.32	0.00229505	0.0101764	0.00911511
238.56	0.00188864	0.0100206	0.00895849
238.8	0.00207273	0.0102863	0.00933502
239.04	0.00218621	0.00987287	0.00939546
239.28	0.00218579	0.010031	0.00927826
239.52	0.00197675	0.0102336	0.0092568
239.76	0.00223467	0.0103078	0.00948255

## Sheet: GIV CT
Time	Exp1	Exp2	Exp3
0	0.000385651	-0.000173031	0.000346199
0.24	0.000145989	0.000117666	8.75874e-05
0.48	0.000291181	-0.000140361	-0.000217887
0.72	0.000234342	0.000236607	4.03299e-05
0.96	0.00014833	0.000222728	-0.000266327
1.2	0.000331759	6.05422e-05	4.3533e-05
1.44	5.6752e-05	-0.000198648	-5.40679e-05
1.68	0.000392654	7.22861e-05	-1.29065e-05
1.92	0.000239061	0.000220453	-4.21959e-05
2.16	0.00026751	2.90271e-06	8.46102e-06
2.4	0.000292611	2.47113e-06	-0.000222354
2.64	0.000133532	-9.60681e-05	-0.000149631
2.88	0.000505161	-0.00024842	-7.64771e-05
3.12	0.000290474	-0.000190905	-0.000178897
3.36	0.000155632	0.000375307	7.53375e-05
3.6	0.000372683	0.000458985	0.00041187
3.84	0.000246834	6.94981e-05	0.000378032
4.08	0.000377854	-0.000118083	0.000295119
4.32	0.000104941	-5.95932e-05	0.000109997
4.56	0.000143239	0.000100455	-9.12426e-05
4.8	-5.71205e-05	8.67613e-05	-0.000126944
5.04	0.000368118	-0.000292702	-0.000138025
5.28	0.000254621	5.06362e-06	-0.000235904
5.52	0.000265393	8.68614e-05	-0.000133934
5.76	0.000119316	0.000158064	0.000148284
6	0.000244168	0.000202679	0.000168437
6.24	0.000262328	1.90887e-05	-5.79764e-05
6.48	0.0001803	9.88627e-05	-0.000137959
6.72	0.000254853	5.38899e-05	0.00014018
6.96	2.39766e-05	5.88489e-05	8.49263e-05
7.2	6.28887e-05	-0.000288424	0.000179022
7.44	-0.000172993	0.000132889	6.57402e-05
7.68	0.000181514	0.000188488	7.76224e-05
7.92	0.000219363	-6.23765e-05	0.000179494
8.16	-0.000168133	-0.000114718	0.000133644
8.4	8.87789e-05	0.000182893	0.000171597
8.64	9.30191e-05	-8.96566e-06	-0.000250482
8.88	6.94169e-05	6.75747e-05	-0.000152424
9.12	9.61911e-05	-0.000196644	0.000314059
9.36	0.000225449	8.84967e-05	-0.000150633
9.6	0.000158348	-0.000247738	-1.1612e-05
9.84	-6.71839e-05	-8.13976e-05	0.000414661
10.08	0.000333678	0.000251297	-0.000215108
10.32	8.39098e-05	0.000268551	0.00012964
10.56	0.000228157	7.62346e-05	-0.000127286
10.8	-2.79852e-05	3.40781e-05	0.000305499
11.04	0.000195685	-0.000271086	-8.04331e-05
11.28	-6.09565e-05	0.000207724	5.79336e-05
11.52	0.000166306	-0.000120652	0.000107185
11.76	-5.5643e-05	-0.000256994	5.46967e-05
12	5.86544e-05	2.21723e-05	-5.11823e-05
12.24	7.54436e-05	-0.000387115	-0.000132771
12.48	-4.45155e-06	-0.000244175	0.000132392
12.72	-0.000184154	-0.000271398	0.000215792
12.96	-0.000207995	0.000168854	6.01938e-05
13.2	-0.000108101	0.000369032	6.38807e-05
13.44	0.000348727	0.000180933	-3.61732e-05
13.68	5.88746e-05	-9.71415e-05	-0.000231302
13.92	-4.78739e-05	9.13259e-05	0.000203431
14.16	0.00011522	0.000132419	-0.000191518
14.4	5.917e-05	-2.93397e-05	0.000230349
14.64	-0.00024746	-0.000145307	0.000157883
14.88	6.09526e-05	-0.000256287	-0.000252964
15.12	-0.000111189	-0.000456256	0.000187114
15.36	0.000124784	-0.000143424	-7.27676e-05
15.6	0.000150932	0.000116883	0.000281078
15.84	-4.00398e-05	0.000140179	-0.000285551
16.08	-0.000119058	0.000182441	3.41974e-05
16.32	0.000206597	-0.000183609	-7.15153e-05
16.56	0.000162906	-2.6183e-05	-9.8199e-05
16.8	-8.23961e-05	0.000277605	0.000202217
17.04	-0.000129049	3.74566e-05	-0.00018197
17.28	-0.000125924	9.2169e-05	-0.000157842
17.52	9.62327e-05	-0.000247802	-1.92681e-05
17.76	-4.57228e-05	0.000277748	-1.3981e-06
18	-0.000132356	-0.000231223	8.22528e-05
18.24	-0.000192743	-6.30832e-05	-0.000219565
18.48	-0.000104177	-9.88257e-05	-0.000133834
18.72	-0.000192224	-2.50347e-06	-0.000600414
18.96	-0.000188684	4.94667e-05	0.00015656
19.2	-0.000291637	-4.45028e-05	-8.94542e-05
19.44	6.72632e-06	-9.66544e-05	8.7337e-05
19.68	-0.000147117	0.000340142	-6.73658e-05
19.92	-0.000170419	-4.35527e-05	-1.04838e-05
20.16	-0.000197341	-0.000410466	-0.000221825
20.4	3.83526e-05	-3.27352e-05	-8.04322e-05
20.64	9.94128e-05	-0.00036437	-0.000339703
20.88	-3.35977e-05	-1.2956e-05	-0.000320423
21.12	-0.000303554	0.000108103	9.86722e-05
21.36	-0.000122961	-6.91632e-05	0.000186899
21.6	-0.000214214	5.55733e-06	0.000161157
21.84	-0.000128898	0.000145649	0.000136992
22.08	-0.000204303	-0.00010667	-0.000176646
22.32	0.000271633	-0.000143755	-0.000131522
22.56	-5.14529e-05	-0.000136153	0.000106566
22.8	-4.4984e-05	-4.45541e-05	0.000250957
23.04	-5.07165e-05	-2.50852e-06	-0.000238228
23.28	-8.6188e-05	0.0006137	0.000390329
23.52	-0.000291094	-5.25965e-05	-0.000144246
23.76	-0.000389441	0.000255924	6.0287e-05
24	-6.7731e-05	9.52427e-05	0.000144354
24.24	-0.000133674	-0.000262117	6.86267e-05
24.48	-0.000248962	-9.75536e-05	0.000134893
24.72	-4.3936e-05	-3.9819e-05	-0.000189493
24.96	-0.000204044	0.00024397	0.000357518
25.2	-0.00021195	-6.82328e-05	-8.38837e-06
25.44	-0.000249894	-3.85373e-05	-1.01563e-05
25.68	-0.000407692	-0.000151307	-0.00025149
25.92	-0.000484358	3.48437e-05	-1.41157e-05
26.16	-4.33614e-05	-7.94841e-05	-1.64825e-05
26.4	-0.000349846	-0.000401118	-0.000209391
26.64	-1.34267e-05	-0.000225767	-6.75954e-05
26.88	-0.000324341	-0.000154752	-0.000358334
27.12	-0.000218769	0.000130373	0.000172391
27.36	-0.000213014	0.000440695	8.90335e-05
27.6	-5.40062e-05	-2.94986e-06	-0.000119215
27.84	-8.28984e-05	0.000474787	-2.84684e-05
28.08	-0.000224554	-0.000111409	-1.72492e-05
28.32	-4.60787e-05	0.000168717	0.000119724
28.56	-0.000511338	-6.5036e-05	0.00019998
28.8	-0.000590017	8.56898e-05	2.25478e-05
29.04	-0.000211404	-4.26658e-06	-0.000182379
29.28	-0.000319321	1.12752e-05	-0.000160183
29.52	-0.000176863	-0.000192842	-4.38721e-05
29.76	-0.000193574	4.70626e-06	4.13917e-05
30	-0.000285102	0.000473696	0.00024686
30.24	6.22791e-05	0.00021408	0.000208497
30.48	-0.000155061	0.000297147	0.000194584
30.72	-0.00810121	-0.00630711	-0.00700192
30.96
31.2	-0.0469948	-0.0387286	-0.0384201
31.44	0.112085	0.0888565	0.0903485
31.68
31.92	-0.000425673	0.000164146	7.00787e-06
32.16	-0.000321027	-0.000262039	0.000113417
32.4	-0.000208072	-1.17775e-05	-0.000284315
32.64	-0.000476653	0.000367833	-0.000294364
32.88	-0.000156949	-0.000191466	0.000115345
33.12	-0.000102877	9.54517e-05	9.26356e-05
33.36	-0.000218498	-0.000244079	1.13343e-05
33.6	-0.000295031	-0.000286465	-4.63368e-05
33.84	-0.00059958	-0.000185758	-0.000140042
34.08	-0.000414946	0.000106067	-0.000218415
34.32	-0.000441953	-0.000165402	9.31212e-05
34.56	-0.000454279	6.30721e-05	-0.000151024
34.8	-0.000553011	0.000224881	-0.000262562
35.04	-0.000427284	-0.000116036	-0.000211454
35.28	-0.000440721	2.50387e-05	-0.000151205
35.52	-0.000490314	0.000244659	0.000106988
35.76	-0.000483924	0.000146126	-0.00017044
36	-0.000360111	1.13571e-05	-9.71799e-05
36.24	-0.000475468	-0.000518257	-4.27215e-06
36.48	-0.000535438	0.000227739	-9.74039e-05
36.72	-0.00035672	-0.000317881	-8.54078e-05
36.96	-0.000190934	-0.000362568	-0.000107223
37.2	-0.000508258	0.000100268	6.38539e-05
37.44	-0.000709822	0.000253905	-1.69801e-05
37.68	-0.000614116	1.31499e-05	-0.000438775
37.92	-0.000512631	0.000118953	-9.82557e-05
38.16	-0.000623674	1.86756e-05	-0.000145186
38.4	-0.000350198	0.000124338	-0.000240028
38.64	-0.000691606	7.74736e-07	-9.31162e-05
38.88	-0.000485104	-0.000136027	-0.000107177
39.12	-0.000496537	9.13042e-05	-0.000214477
39.36	-0.000580587	-0.000175403	-0.000148549
39.6	-0.000622787	-0.000391213	2.92865e-05
39.84	-0.00064278	7.9701e-05	-0.000400214
40.08	-0.000709556	-0.000265883	-0.000261223
40.32	-0.000327622	-8.79919e-05	-2.28146e-05
40.56	-0.000713849	-7.99004e-05	-0.000115514
40.8	-0.000567335	3.88244e-05	-0.000509433
41.04	-0.000671461	-0.00028593	6.38098e-05
41.28	-0.000824316	0.000349442	-0.000377888
41.52	-0.000839165	1.42894e-05	-0.000254783
41.76	-0.000621743	0.000144426	0.000297138
42	-0.000611145	0.000381014	-0.000288351
42.24	-0.000863748	0.000229543	0.000176708
42.48	-0.000643129	-0.000193614	0.000146657
42.72	-0.000734423	3.11528e-05	-0.000173507
42.96	-0.000685419	-0.000245086	-0.000109142
43.2	-0.000605544	-0.000167886	-0.000401041
43.44	-0.000764689	-0.000105652	-0.000162079
43.68	-0.000918666	0.000231813	-0.000209602
43.92	-0.000684393	-7.32791e-05	-0.000429975
44.16	-0.000686444	0.00015126	-0.000206908
44.4	-0.000790757	7.88742e-05	-0.000167913
44.64	-0.000644176	0.000128573	-0.000360297
44.88	-0.00107983	8.471e-05	-0.000377967
45.12	-0.000878928	-8.62453e-05	-8.99441e-05
45.36	-0.000585123	-0.000309086	-0.000330989
45.6	-0.000797176	-0.000275546	-5.14182e-05
45.84	-0.000739237	2.5607e-06	-3.14893e-05
46.08	-0.00122725	-0.000301356	-0.000243233
46.32	-0.000970799	-4.11223e-06	-0.000316068
46.56	-0.000898661	4.20932e-05	-0.000511668
46.8	-0.00104265	-6.58558e-05	-0.000357209
47.04	-0.00087146	-0.000619076	-0.000379668
47.28	-0.000779063	-0.000172411	-0.00040261
47.52	-0.0011018	-6.80748e-05	-0.000376834
47.76	-0.00110173	-0.000149324	-0.000315583
48	-0.000698341	0.000163382	-0.000532293
48.24	-0.000906583	9.14886e-05	-0.000402132
48.48	-0.000811645	-0.000308711	-0.000568002
48.72	-0.000917114	0.000125373	-0.000196349
48.96	-0.00112113	-0.000331593	-0.00013243
49.2	-0.000780998	-0.000175844	-0.000312685
49.44	-0.000865881	-0.00024591	-0.000224397
49.68	-0.000972183	9.03033e-05	2.08472e-05
49.92	-0.000701682	-5.95881e-05	-0.000109908
50.16	-0.000811698	-1.72707e-05	-0.00010636
50.4	-0.00100753	5.87811e-05	-0.000320858
50.64	-0.000860806	-0.000181821	-0.000131551
50.88	-0.00117399	-0.000167968	-0.000300581
51.12	-0.000730667	-9.61813e-05	-0.000202968
51.36	-0.000837473	-0.000283166	-0.000330591
51.6	-0.000876875	-0.000235482	7.2257e-05
51.84	-0.000789086	-8.80321e-05	-0.00036649
52.08	-0.00119499	-0.000205634	0.000232803
52.32	-0.000890289	-0.000202543	-0.000176238
52.56	-0.000960891	6.58532e-06	-0.000366169
52.8	-0.00100533	-0.000158464	-0.000258254
53.04	-0.00114847	5.30025e-05	-0.00038368
53.28	-0.00110335	0.000276575	-1.86494e-05
53.52	-0.00127294	-0.000534369	-0.000389346
53.76	-0.00106892	-0.000299067	2.8926e-05
54	-0.00110933	-0.000323887	-0.000384794
54.24	-0.000844391	-0.000371323	-0.000292928
54.48	-0.000821199	-0.000141649	-0.0001305
54.72	-0.00100077	-0.000299797	-0.000205525
54.96	-0.000910894	-4.07591e-05	-0.000297551
55.2	-0.00104588	3.70072e-05	-0.000169832
55.44	-0.00110546	-0.000178506	-0.000312186
55.68	-0.000805622	-0.000127315	-0.000239206
55.92	-0.00144714	-0.000135251	-0.000432788
56.16	-0.000921655	-0.000494916	-0.000214697
56.4	-0.00123524	-0.000382126	-0.000147451
56.64	-0.00109123	-0.00020805	-0.000508588
56.88	-0.00146859	0.000136055	-0.00056233
57.12	-0.00130566	-0.000292384	-0.000263866
57.36	-0.00122277	-6.0123e-05	-0.000119362
57.6	-0.00107767	-0.000199204	-0.000108828
57.84	-0.000955349	-0.000326508	-0.000647984
58.08	-0.00110106	-0.000103577	-0.000297954
58.32	-0.000922512	-0.00034102	-0.000256021
58.56	-0.00093214	-0.000432022	-0.000614938
58.8	-0.00120305	-0.000499625	-0.000215642
59.04	-0.00108066	-0.0001521	-0.000282878
59.28	-0.00131557	-8.70662e-05	-0.00041083
59.52	-0.00113028	-1.66759e-05	-0.000281824
59.76	-0.00133814	-0.000461041	-0.000369828
60	-0.0010392	-0.000267774	-4.97143e-05
60.24	-0.00116877	-0.000282685	-0.000399665
60.48	-0.00110205	-0.000341041	-0.000382548
60.72	-0.00134739	-0.000338445	-0.000465523
60.96	-0.00112297	-0.000256221	-3.95666e-05
61.2	-0.000914187	-0.000562033	-0.000421397
61.44	-0.0012205	-1.807e-05	-7.96417e-05
61.68	-0.00105166	-0.000184739	-0.000216696
61.92	-0.00151087	-0.000201196	-0.000304872
62.16	-0.00103571	-0.000350798	-0.00064334
62.4	-0.00101762	-4.81754e-05	-0.000301295
62.64	-0.00106721	-0.000449538	-0.000423486
62.88	-0.00142694	-0.000255409	-0.000224534
63.12	-0.00143436	-4.54924e-05	-0.000187294
63.36	-0.00104184	-0.000254636	-0.000535112
63.6	-0.0012725	-0.000254249	-0.000378558
63.84	-0.00129349	-0.000325075	-0.000291018
64.08	-0.00116522	-0.00023331	-0.000261082
64.32	-0.00135283	-0.000114468	-0.000472846
64.56	-0.00111271	1.89942e-05	-0.000478886
64.8	-0.00154933	-0.000183655	-0.000357263
65.04	-0.0012566	0.000177812	-0.000212168
65.28	-0.00111655	-0.000249682	-0.00031575
65.52	-0.00126404	-0.000560526	-0.000278733
65.76	-0.00120817	-0.000225527	-0.000508317
66	-0.00110348	-0.000213459	-0.000298198
66.24	-0.00133354	-0.000402429	-0.000413384
66.48	-0.00127578	-0.000541245	-0.00048528
66.72	-0.00125412	3.48146e-05	-0.000399234
66.96	-0.00126274	5.90804e-05	-0.0004622
67.2	-0.00127659	-0.000545247	-0.000240121
67.44	-0.00105823	-0.000383043	-0.000764293
67.68	-0.00144336	-0.00062494	-0.000495603
67.92	-0.00113056	0.000117833	-0.0003196
68.16	-0.00124302	-0.000426004	-0.000675055
68.4	-0.00156174	-0.000440394	-0.000290687
68.64	-0.00161002	-0.000432205	-0.000369392
68.88	-0.00122174	4.27561e-05	-9.06638e-05
69.12	-0.0013491	-0.00028133	-0.000482049
69.36	-0.00119927	-0.000334514	-0.000538707
69.6	-0.00106891	-0.000309414	-0.000435049
69.84	-0.00137186	-0.000277934	-0.000521428
70.08	-0.00138214	-0.00058828	-0.000456851
70.32	-0.00130679	-5.98639e-05	-0.000369466
70.56	-0.00147476	-0.000197337	-0.000619803
70.8	-0.00138265	-0.000312036	-0.000119704
71.04	-0.0013264	-6.30634e-05	-0.000296686
71.28	-0.00142861	6.79515e-05	-0.000492029
71.52	-0.00121333	-0.000131236	-0.000369756
71.76	-0.00145552	0.000164715	-0.000463801
72	-0.00152602	-0.000462005	-0.000475973
72.24	-0.00160939	-0.000190896	-0.000568244
72.48	-0.00153576	-0.000379213	-0.000481587
72.72	-0.00126433	1.32552e-05	-0.000538859
72.96	-0.00150019	-0.000157779	-0.000333346
73.2	-0.001331	0.000164125	-0.000592905
73.44	-0.00145007	-0.000372735	-0.000253533
73.68	-0.00150112	-0.000165053	-0.00047093
73.92	-0.00146527	-0.00020128	-0.000657053
74.16	-0.00121171	-0.000321415	-0.00035235
74.4	-0.00140371	-0.000197088	-0.000313268
74.64	-0.00158883	-0.000400576	-0.000455388
74.88	-0.00163368	-0.000529749	-0.000470865
75.12	-0.0017755	-0.000319544	-0.000219769
75.36	-0.001511	-9.81894e-05	-0.000466214
75.6	-0.0012743	-0.000300398	-0.000252382
75.84	-0.00152628	-5.36109e-05	-6.26871e-05
76.08	-0.00148914	0.000171145	-0.000644042
76.32	-0.00136035	-0.000264296	-0.000439618
76.56	-0.00132193	-0.000703589	-8.28601e-05
76.8	-0.00158132	-0.000382487	-0.000140571
77.04	-0.00164113	-0.000340645	-0.000432291
77.28	-0.00149058	-2.16931e-05	-0.000477003
77.52	-0.00166867	-0.000345896	-0.000763604
77.76	-0.00133027	-0.000460978	-0.00038623
78	-0.00158369	-0.000241908	-0.00033876
78.24	-0.00157931	-0.000472923	-6.17408e-05
78.48	-0.00176717	-0.000671574	-0.000205263
78.72	-0.00145455	-6.1431e-05	-0.000284802
78.96	-0.00166117	-0.000298086	-0.000349419
79.2	-0.00135801	-0.000203871	-0.000207829
79.44	-0.00140523	-0.000187605	-0.000416988
79.68	-0.00172707	-0.000372686	-0.000289488
79.92	-0.0015892	-0.000203792	-0.000271486
80.16	-0.00181643	4.426e-05	-0.000422811
80.4	-0.0013183	-8.23146e-05	-0.000435257
80.64	-0.00165371	0.000125017	-0.000540387
80.88	-0.00150308	9.63596e-05	-0.000512187
81.12	-0.0017145	0.000116184	-0.000642643
81.36	-0.00144338	0.000195236	-0.000325621
81.6	-0.00167515	-4.81198e-05	-0.000474733
81.84	-0.00149168	-0.000474982	-0.000638516
82.08	-0.00168119	-0.000647068	-0.000454526
82.32	-0.00154706	-0.000217985	-0.000652588
82.56	-0.00121186	-7.68922e-05	-0.000225111
82.8	-0.00150464	-0.00028404	-0.000409458
83.04	-0.00155763	-1.58341e-05	-0.000639188
83.28	-0.00167015	-0.000411768	-0.000679358
83.52	-0.00159548	-0.000107307	-0.000668037
83.76	-0.00170769	-0.000572407	-0.000216586
84	-0.00157947	-6.69891e-05	-0.000534555
84.24	-0.00145513	-0.000477245	-0.000374869
84.48	-0.00178142	-7.42685e-05	-0.000476074
84.72	-0.0017636	-0.000559648	-0.000342494
84.96	-0.00143434	-0.0001167	-0.000367767
85.2	-0.0018842	-0.000323789	-0.000117035
85.44	-0.00193408	-0.000119976	-0.000306209
85.68	-0.0020454	-0.000124823	-0.000237932
85.92	-0.00183098	-0.000675971	-0.000448192
86.16	-0.00175611	-0.000354437	-0.000281474
86.4	-0.00179749	-0.000282883	-0.000288906
86.64	-0.00140176	-0.000131851	-0.000588185
86.88	-0.00163747	9.84574e-05	-0.000121886
87.12	-0.00158278	-0.000308251	-0.000610329
87.36	-0.00158412	-0.000437646	-0.000577884
87.6	-0.00158373	7.33662e-05	-0.000374835
87.84	-0.00197026	0.000204859	-0.000329391
88.08	-0.00159525	-0.000354594	-0.000380269
88.32	-0.0016469	0.000192206	-0.000258601
88.56	-0.00167738	-0.000293811	-0.000515459
88.8	-0.00199463	-0.000280131	-0.00020941
89.04	-0.00175946	-0.000346645	-0.000445789
89.28	-0.00140363	-0.000188474	-0.000600538
89.52	-0.00192444	-0.000234151	-0.000476133
89.76	-0.00177157	-0.000565922	-0.000528158
90	-0.00162228	-0.000509409	-0.000397674
90.24	-0.00196686	-1.08723e-05	-0.000607155
90.48	-0.00190339	-0.000532315	-0.000481616
90.72	-0.00186082	-0.000249545	-0.000304664
90.96	-0.00165889	-0.000460583	-0.000408904
91.2	-0.00192049	-0.000216556	-0.000417938
91.44	-0.00181175	-0.000500501	-0.000367966
91.68	-0.00150088	-0.000391201	-0.000609864
91.92	-0.0018285	-0.000300632	-0.000463767
92.16	-0.00173438	-0.000443812	-0.000320743
92.4	-0.00170509	-0.000293001	-0.000382771
92.64	-0.0014281	-0.000375961	-0.00043805
92.88	-0.00172161	-0.000318902	-0.000571921
93.12	-0.00195428	-0.000396184	-0.000151614
93.36	-0.00186676	-0.000261024	-0.000232082
93.6	-0.00173343	-0.000405804	-0.000153269
93.84	-0.00177104	-0.000451897	-0.000485382
94.08	-0.00176207	-0.000254122	-0.000415928
94.32	-0.00174829	-0.000193429	-0.000819497
94.56	-0.00195086	-0.000586956	-0.000430522
94.8	-0.00188449	-0.000146827	-0.000581583
95.04	-0.00185631	-0.00031471	-0.000379183
95.28	-0.00180943	-0.000464102	-0.000789958
95.52	-0.00189584	-0.00032083	-0.000357892
95.76	-0.00172999	-4.93378e-06	-0.000305881
96	-0.00194339	-0.000531825	-0.000475807
96.24	-0.0018985	-1.9424e-06	-0.0005003
96.48	-0.00167288	-0.000292573	-0.000175382
96.72	-0.00220552	-0.000451861	-0.000479387
96.96	-0.00211383	2.24843e-05	-0.000335379
97.2	-0.00199555	-0.000338408	-0.000277067
97.44	-0.00188304	-0.000162977	-0.000509674
97.68	-0.00200286	-8.53522e-05	-0.000402962
97.92	-0.00177819	-0.000174264	-0.000383815
98.16	-0.00189722	0.000122564	-0.000621147
98.4	-0.00192042	-0.000304384	-0.000668278
98.64	-0.00194468	-0.00036302	-0.000222516
98.88	-0.00180677	-0.000233979	-0.000587119
99.12	-0.00196006	-0.000121872	-0.00066567
99.36	-0.00208999	-0.000341537	-0.000594423
99.6	-0.00225588	5.42268e-05	-0.000561995
99.84	-0.00185073	0.000139589	-0.000457703
100.08	-0.00181741	-0.000149127	-0.000540384
100.32	-0.00213196	-8.94612e-05	-0.000649658
100.56	-0.00182406	-0.000444247	-0.000412449
100.8	-0.00185922	-0.00043905	-0.000720906
101.04	-0.00184487	-0.000122172	-0.000244766
101.28	-0.00184355	-0.000368892	-0.000800994
101.52	-0.00198384	-0.00027755	-0.000560551
101.76	-0.00191302	-0.000350006	-0.000474344
102	-0.0020469	-0.000238413	-0.000490852
102.24	-0.0021547	0.000124384	-0.000681009
102.48	-0.00189312	6.9354e-05	-0.000344606
102.72	-0.00208636	-0.000434898	-0.000239246
102.96	-0.00190134	-0.000372346	-0.000482429
103.2	-0.00194558	-2.32454e-05	-0.000513522
103.44	-0.00206967	-0.000182669	-0.000546194
103.68	-0.00181563	0.000209068	-0.000486358
103.92	-0.0022039	-0.000765002	-0.0004954
104.16	-0.00218695	-0.000685411	-0.000156335
104.4	-0.00193985	-0.000525747	-0.000525961
104.64	-0.00197158	6.11184e-05	-0.000412537
104.88	-0.00236883	-0.000272833	-0.000807956
105.12	-0.00194727	-0.000257827	-0.000316297
105.36	-0.00228802	-0.000323207	-0.000592277
105.6	-0.00204425	-0.000268152	-0.000265814
105.84	-0.00229211	-0.000303953	-0.000131235
106.08	-0.00185756	-9.65746e-05	-0.000369735
106.32	-0.00213656	-0.000490229	-0.000483414
106.56	-0.00182276	-0.000417965	-0.000457834
106.8	-0.0021549	-0.000204107	-0.000679673
107.04	-0.00231391	-0.000566202	-0.00066889
107.28	-0.00201518	-0.000315512	-0.000335215
107.52	-0.00193944	-0.000651817	-0.000646176
107.76	-0.00222945	-0.000413502	-0.000434465
108	-0.0019138	-0.000617489	-0.000106094
108.24	-0.00215157	-0.000315518	-0.000383479
108.48	-0.00228345	-0.00033751	-0.000687356
108.72	-0.0024692	-0.000356017	-0.000641937
108.96	-0.00194243	-0.000585336	-0.000535472
109.2	-0.0022412	-0.000347195	-0.000522436
109.44	-0.00184898	-0.000468694	-0.000552475
109.68	-0.0021574	-0.000261065	-0.000371277
109.92	-0.00229135	-0.000349887	-0.000696652
110.16	-0.00208486	-0.000372663	-0.000433878
110.4	-0.00211063	-0.00029774	-0.000351358
110.64	-0.00210072	-0.00031746	-0.000639204
110.88	-0.00247562	-0.000785589	-0.000354873
111.12	-0.00230238	0.000123786	-0.000691759
111.36	-0.00231624	-0.000273761	-0.000424885
111.6	-0.00214547	-0.000569593	-0.000332238
111.84	-0.00219923	-0.000465227	-0.000483415
112.08	-0.00208478	-0.000145769	-0.000129661
112.32	-0.00188232	-0.000417564	-0.000447465
112.56	-0.00215867	-0.000151771	-0.000239751
112.8	-0.00215913	-0.000313987	-0.000399149
113.04	-0.00231116	-0.000444832	-0.000331114
113.28	-0.00228074	-0.000291516	-0.000493169
113.52	-0.002052	-0.000253173	-0.000762749
113.76	-0.00232112	-0.000246647	-0.000525223
114	-0.00238197	-9.21831e-05	-0.000772165
114.24	-0.0021372	-0.000138704	-0.000322836
114.48	-0.00232321	-0.000201879	-0.000356045
114.72	-0.00219543	-0.00015736	-0.000721947
114.96	-0.00233701	-0.000358164	-0.000824531
115.2	-0.00226788	-0.000742248	-0.000764697
115.44	-0.00243348	-0.000713067	-0.000316734
115.68	-0.00212577	-0.000466153	-0.000516639
115.92	-0.002443	9.9133e-05	-0.000763232
116.16	-0.00242846	-0.000128227	-0.000574429
116.4	-0.00259637	-0.000526011	-0.000277827
116.64	-0.00237516	-0.000256858	-0.000592353
116.88	-0.00226401	-0.000350554	-0.000259094
117.12	-0.00244723	-0.000133938	-0.000497606
117.36	-0.00225877	-0.000368747	-0.000668617
117.6	-0.00218374	-6.56778e-05	-0.00068586
117.84	-0.00256824	0.000107471	-0.000389398
118.08	-0.00223704	-0.000575665	-0.000601542
118.32	-0.00231655	-0.000473488	-0.000302036
118.56	-0.00216231	-0.000623271	-0.000888946
118.8	-0.00225135	-0.000808226	-0.000405924
119.04	-0.00265584	-7.99136e-05	-0.000480703
119.28	-0.00249333	-0.0002023	-0.000728698
119.52	-0.00228717	-0.00027624	-0.000557743
119.76	-0.00203475	-0.000506896	-0.000807061
120	-0.00220799	-0.000239484	-0.000611193
120.24	-0.00226392	-0.000410048	-0.000474918
120.48	-0.00229759	-0.000538303	-0.000509805
120.72	-0.00245764	3.39603e-05	-0.000591086
120.96	-0.0021246	-0.000540978	-0.000563876
121.2	-0.00252921	-0.000388508	-0.00090446
121.44	-0.00238229	-0.000847379	-0.000398735
121.68	-0.00221253	-6.56558e-05	-0.000170861
121.92	-0.00229568	-0.000369005	-0.00108783
122.16	-0.00245957	0.000268968	-0.000464597
122.4	-0.00224089	-0.0004037	-0.000139979
122.64	-0.00262077	-0.000236788	-0.000755537
122.88	-0.00228097	-0.000329612	-0.00036467
123.12	-0.00241977	-0.000282014	-0.000374001
123.36	-0.00241409	-0.000312052	-0.000632649
123.6	-0.00248826	-0.00031792	-0.000340023
123.84	-0.00248822	-0.000331582	-0.000292394
124.08	-0.00246774	-0.000435965	-0.000795579
124.32	-0.00198308	-0.000636276	-0.00085931
124.56	-0.00250447	-0.000125061	-0.00024514
124.8	-0.0024715	-0.000751988	-0.000410553
125.04	-0.00234699	-0.000481933	-0.000565884
125.28	-0.00240906	-0.000651038	-0.000555851
125.52	-0.00231369	-0.000489902	-0.000481259
125.76	-0.00240132	-0.000253772	-0.000733641
126	-0.00255619	-0.000288175	-0.000683163
126.24	-0.00240622	-0.00059097	-0.000460461
126.48	-0.00234853	-0.000619475	-0.000608749
126.72	-0.00254358	-1.37944e-05	-0.000610233
126.96	-0.00215253	-0.000171677	-0.000828606
127.2	-0.00243577	-0.000278751	-0.000674434
127.44	-0.00228867	-0.000269713	-0.000483371
127.68	-0.00256908	6.49295e-05	-0.00062462
127.92	-0.00230899	-0.000392812	-0.000519715
128.16	-0.00232801	-0.000351673	-0.000216677
128.4	-0.00255157	-0.000106338	-0.000725674
128.64	-0.00253457	-0.000128336	-0.000616293
128.88	-0.002202	-4.5779e-05	-0.000929576
129.12	-0.0025447	-0.000416617	-0.000758407
129.36	-0.00236926	-0.000385129	-0.00029111
129.6	-0.00253025	-3.03991e-05	-0.000281945
129.84	-0.00253498	-0.000895377	-0.000555109
130.08	-0.00269656	-0.000232385	-0.000214714
130.32	-0.00258831	-0.000504272	-0.000677299
130.56	-0.00246636	-0.000377312	-0.000762996
130.8	-0.00255714	-0.000496385	-0.000771412
131.04	-0.00231636	-0.000100718	-0.000645608
131.28	-0.00233076	-0.000394672	-0.000714989
131.52	-0.00240116	-8.66391e-05	-0.000314739
131.76	-0.00251875	-0.000423681	-0.000485343
132	-0.00280315	-0.000402046	-0.000393737
132.24	-0.00265454	-0.000791541	-0.000404046
132.48	-0.00255356	-0.00026287	-0.000622565
132.72	-0.00271604	-0.0002546	-0.000456959
132.96	-0.00240806	-0.000473932	-0.00050507
133.2	-0.00272856	-0.000663116	-0.000417498
133.44	-0.00291239	-0.000431287	-0.000745186
133.68	-0.00264222	-9.05876e-05	-0.000475898
133.92	-0.00264292	-0.000196991	-0.000351657
134.16	-0.0022958	-1.88565e-05	-0.000602029
134.4	-0.00255917	-0.000441271	-0.000320474
134.64	-0.00271709	-0.000747406	-0.000440008
134.88	-0.00247039	-2.29161e-05	-0.000386281
135.12	-0.00239186	-0.000167264	-0.000599687
135.36	-0.00266539	-0.000599848	-0.000587498
135.6	-0.00255075	-0.000317571	-0.000604457
135.84	-0.00287882	-0.000543939	-0.000599242
136.08	-0.00258288	-0.000452781	-0.000651255
136.32	-0.00270594	-0.000512396	-0.000297077
136.56	-0.00257126	-0.00015441	-0.000913619
136.8	-0.00251222	-0.000301403	-0.000304305
137.04	-0.00264007	-0.000263462	-0.000482742
137.28	-0.00266888	4.97163e-05	-0.000541618
137.52	-0.00259995	-8.03921e-05	-0.000500424
137.76	-0.00278612	-0.000197403	-0.000671841
138	-0.00265542	-0.000151982	-0.000708375
138.24	-0.00251949	-0.000225421	-0.000461305
138.48	-0.00264001	-0.000337386	-0.000808298
138.72	-0.00268743	-0.000499046	-0.000744135
138.96	-0.00268822	-0.000463662	-0.000734515
139.2	-0.00274561	-0.000572367	-0.000840275
139.44	-0.00242452	-0.000492436	-0.000685244
139.68	-0.00269454	-0.00042372	-0.000615444
139.92	-0.00264888	-0.000290265	-0.000907135
140.16	-0.00263322	-0.000779249	-0.000831528
140.4	-0.00252556	-2.61431e-05	-0.000511348
140.64	-0.00267648	-0.000292242	-0.000584187
140.88	-0.00255218	-0.000312851	-0.000435575
141.12	-0.00294038	-0.000412305	-0.000729517
141.36	-0.00266211	-0.000285852	-0.000729514
141.6	-0.00289377	-0.000335828	-0.00080819
141.84	-0.00292627	-0.00016486	-0.000786294
142.08	-0.00268494	-0.000326714	-0.000887609
142.32	-0.00294362	-0.000169197	-0.000583229
142.56	-0.002766	-0.000451054	-0.000388734
142.8	-0.00269417	-0.000476493	-0.000466989
143.04	-0.00278079	-0.000547766	-0.000534334
143.28	-0.00276073	-0.000339066	-0.00080952
143.52	-0.00250076	-0.000556939	-0.00026784
143.76	-0.00229996	-0.000520948	-0.000505705
144	-0.00261235	-0.000220738	-0.000767046
144.24	-0.00287309	-0.000629837	-0.000434001
144.48	-0.00282536	-0.000541824	-0.000494124
144.72	-0.00290669	-0.000367385	-0.000771758
144.96	-0.00255626	-0.000425061	-0.000513688
145.2	-0.00282197	-0.000211232	-0.000654417
145.44	-0.0025509	-0.000647595	-0.000725265
145.68	-0.00270639	-0.000872785	-0.000717512
145.92	-0.00265615	-6.94753e-05	-0.000379276
146.16	-0.0027906	-0.000929465	-0.000683789
146.4	-0.00269682	-0.000646717	-0.000583622
146.64	-0.00278977	-0.000232123	-0.000670489
146.88	-0.00251266	-0.000406207	-0.000853017
147.12	-0.0027435	-0.000435054	-0.000723322
147.36	-0.00293661	-0.000259797	-0.0003242
147.6	-0.00300499	-0.000263875	-0.000274052
147.84	-0.00283934	-0.000461139	-0.000434756
148.08	-0.00280545	-0.000477612	-0.000584946
148.32	-0.00281389	-0.000570144	-0.000758716
148.56	-0.00279075	5.13684e-05	-0.000570194
148.8	-0.00282445	7.02154e-05	-0.000683662
149.04	-0.00278369	-0.000405833	-0.000545922
149.28	-0.00290551	-0.000252194	-0.000755624
149.52	-0.0031229	-0.000453947	-0.000574369
149.76	-0.00292754	-0.00029609	-0.000371648
150	-0.00275324	-0.000263541	-0.000466269
150.24	-0.00245498	2.24213e-05	-0.000129279
150.48	-0.00259289	5.62598e-05	0.000278678
150.72	-0.0100362	-0.00595656	-0.00575845
150.96	0.0257513	0.0362249	0.0347968
151.2	-0.0472108	-0.0374365	-0.0375668
151.44	0.117448	0.0953746	0.0994924
151.68	0.00996069	0.0100993	0.0114338
151.92	-0.00170732	0.00101222	0.00141029
152.16	-0.00160721	0.00116766	0.00183215
152.4	-0.00130279	0.00121062	0.00226076
152.64	-0.00104321	0.00190839	0.00256827
152.88	-0.00116489	0.00147155	0.00253422
153.12	-0.00111277	0.00211974	0.00273837
153.36	-0.000723134	0.0016544	0.00321468
153.6	-0.000724589	0.00233402	0.00357271
153.84	-0.000692449	0.0021734	0.00375674
154.08	-0.000459811	0.00238646	0.00350211
154.32	-0.000508829	0.00247518	0.00383343
154.56	-0.00055708	0.00290341	0.00403001
154.8	-0.000282224	0.00301738	0.00420108
155.04	-5.85849e-06	0.00290597	0.00405852
155.28	8.07247e-05	0.00313793	0.00438342
155.52	0.000205327	0.00295032	0.00423468
155.76	0.000368769	0.00360338	0.00442864
156	0.000411602	0.00314582	0.00477118
156.24	0.000709523	0.00331981	0.00470711
156.48	0.000490845	0.00345677	0.00528726
156.72	0.000525389	0.00347857	0.00513328
156.96	0.000508803	0.0037074	0.00490289
157.2	0.000705379	0.00394116	0.00503862
157.44	0.00121985	0.00366688	0.00528045
157.68	0.00108607	0.00387342	0.00534769
157.92	0.000976437	0.00396048	0.00531022
158.16	0.00116051	0.00355499	0.00559637
158.4	0.000877047	0.00414855	0.00588503
158.64	0.00135617	0.00433245	0.00579438
158.88	0.00160264	0.00433565	0.00582655
159.12	0.00158648	0.00428935	0.00578087
159.36	0.00167601	0.00446353	0.00569345
159.6	0.00154251	0.00444476	0.00581945
159.84	0.00159358	0.00467812	0.00580103
160.08	0.00147884	0.00480617	0.0057858
160.32	0.00159912	0.00486477	0.00635161
160.56	0.00188641	0.00510626	0.0058715
160.8	0.00186916	0.00486787	0.00589541
161.04	0.00170894	0.0047187	0.00595483
161.28	0.00183576	0.00480748	0.0060882
161.52	0.0020978	0.0049724	0.00642581
161.76	0.00199181	0.00470829	0.00637026
162	0.00186183	0.00494273	0.00615283
162.24	0.00200455	0.004509	0.00634065
162.48	0.00251708	0.00518865	0.00628733
162.72	0.00232634	0.00521884	0.00643633
162.96	0.00221724	0.00535824	0.00651485
163.2	0.00217486	0.00534153	0.00645865
163.44	0.0023691	0.00536659	0.00679757
163.68	0.00214181	0.00561514	0.00639264
163.92	0.00251807	0.00513287	0.00667487
164.16	0.00224316	0.00535588	0.0069196
164.4	0.00279832	0.00517409	0.00687406
164.64	0.00223385	0.00533492	0.00688311
164.88	0.00279401	0.00562121	0.00698061
165.12	0.0025915	0.00563126	0.00679405
165.36	0.00250341	0.00568462	0.00699948
165.6	0.00291011	0.00579634	0.00715777
165.84	0.00271066	0.00598437	0.00716303
166.08	0.00288154	0.00570797	0.0071103
166.32	0.00241463	0.00567859	0.00717803
166.56	0.00281203	0.00610918	0.00721402
166.8	0.00295911	0.00582124	0.00738729
167.04	0.00256197	0.00555326	0.00759942
167.28	0.00279713	0.00589026	0.00759964
167.52	0.0028878	0.00576082	0.0072651
167.76	0.00307605	0.00578564	0.00712769
168	0.00282356	0.00641492	0.00754279
168.24	0.0030863	0.00599784	0.00754307
168.48	0.00316296	0.00617136	0.00739105
168.72	0.00303558	0.0057734	0.0081173
168.96	0.00309494	0.00616487	0.00785139
169.2	0.00303411	0.00656207	0.00770044
169.44	0.00304818	0.00601937	0.00794414
169.68	0.00308596	0.00614608	0.00795459
169.92	0.00324625	0.00647172	0.00808404
170.16	0.00315003	0.00649113	0.00756611
170.4	0.00326614	0.00654403	0.00799297
170.64	0.00332449	0.0062308	0.00782518
170.88	0.00342983	0.00664652	0.00813938
171.12	0.00314226	0.00625056	0.00811786
171.36	0.00342462	0.00662194	0.00814805
171.6	0.00323885	0.00657306	0.00807176
171.84	0.00359021	0.0066772	0.00818265
172.08	0.00347814	0.00629741	0.00827993
172.32	0.00320715	0.00671644	0.00804089
172.56	0.00333048	0.00673305	0.00811733
172.8	0.00332694	0.00692207	0.00825428
173.04	0.00347327	0.00671276	0.00817992
173.28	0.00379658	0.00655097	0.00838024
173.52	0.00338912	0.00636963	0.00816834
173.76	0.0035243	0.00689234	0.00850571
174	0.00321452	0.00630681	0.00872638
174.24	0.00370573	0.00703166	0.00845575
174.48	0.00355423	0.00713174	0.00856402
174.72	0.00366294	0.00693607	0.00856232
174.96	0.00357387	0.00692922	0.00833805
175.2	0.0036377	0.00715862	0.00885155
175.44	0.00373378	0.00648971	0.00833668
175.68	0.00332349	0.00671214	0.00844765
175.92	0.00388087	0.00678042	0.00876737
176.16	0.0035656	0.00681698	0.00861068
176.4	0.00384424	0.0069655	0.00865539
176.64	0.00355404	0.00679708	0.00887835
176.88	0.00366854	0.00711379	0.00853601
177.12	0.00371318	0.00667247	0.00873586
177.36	0.00407481	0.00635862	0.00865365
177.6	0.00390631	0.00701461	0.00846577
177.84	0.00382941	0.00656661	0.00879537
178.08	0.00381728	0.00710827	0.00903998
178.32	0.0040747	0.00705625	0.00847647
178.56	0.00404753	0.0066997	0.00860521
178.8	0.00387455	0.00693724	0.00903769
179.04	0.00390951	0.00704432	0.00918326
179.28	0.00397241	0.00701334	0.0088066
179.52	0.00384162	0.00739628	0.00881896
179.76	0.00397527	0.00694928	0.00899341
180	0.00383566	0.00689633	0.00913603
180.24	0.00389951	0.006793	0.00870646
180.48	0.00367854	0.00726824	0.00909738
180.72	0.00410929	0.00700403	0.00921435
180.96	0.00402739	0.00752713	0.00926299
181.2	0.00382036	0.00714598	0.00907969
181.44	0.00417454	0.0072014	0.00901067
181.68	0.00367884	0.00754436	0.00895818
181.92	0.0037691	0.00680916	0.00959129
182.16	0.00386675	0.00706346	0.0095435
182.4	0.00364045	0.00729877	0.00937093
182.64	0.0038221	0.00691221	0.00916677
182.88	0.00385397	0.00690771	0.00930228
183.12	0.00405316	0.00729102	0.00956601
183.36	0.00388613	0.00748768	0.00927283
183.6	0.00403688	0.00743313	0.0094525
183.84	0.00414107	0.00716852	0.00970628
184.08	0.00413387	0.00735457	0.0092977
184.32	0.00409444	0.00721913	0.00996402
184.56	0.00415362	0.0072666	0.00940193
184.8	0.00413713	0.00717932	0.00916649
185.04	0.00378781	0.00793415	0.00996506
185.28	0.00382984	0.00719745	0.00962728
185.52	0.00415726	0.00760146	0.00933018
185.76	0.00399436	0.00708076	0.00964932
186	0.00375318	0.00755075	0.00919004
186.24	0.00387247	0.00761047	0.00948082
186.48	0.00409172	0.00761684	0.00976299
186.72	0.00398059	0.0075727	0.0094991
186.96	0.00406556	0.00720139	0.00973094
187.2	0.00405921	0.00751432	0.00977321
187.44	0.0040019	0.0076135	0.00937814
187.68	0.00405598	0.00716429	0.00972277
187.92	0.00397934	0.00714449	0.00934877
188.16	0.00362138	0.00771436	0.00975284
188.4	0.00392875	0.00730822	0.00955901
188.64	0.0041387	0.00727358	0.00970719
188.88	0.00415122	0.00715908	0.0100153
189.12	0.00358009	0.00755761	0.00988651
189.36	0.00415464	0.0075105	0.0100354
189.6	0.00414745	0.00694622	0.0097528
189.84	0.00403011	0.00731806	0.009892
190.08	0.00421131	0.0071041	0.00978363
190.32	0.00438118	0.00714887	0.0100865
190.56	0.00413487	0.00754696	0.00982786
190.8	0.0040436	0.00723697	0.00982421
191.04	0.00426599	0.00719866	0.00967536
191.28	0.0040425	0.00681006	0.0102101
191.52	0.00425252	0.00744278	0.00991505
191.76	0.00401659	0.00728985	0.0100819
192	0.00380864	0.00753013	0.0103015
192.24	0.00412517	0.00752072	0.00954917
192.48	0.00418171	0.00760293	0.00957618
192.72	0.00415745	0.00755025	0.0101452
192.96	0.00388767	0.00736144	0.00995693
193.2	0.00409873	0.00741491	0.0100792
193.44	0.00420928	0.00732475	0.00990261
193.68	0.00412135	0.00744255	0.0101419
193.92	0.00423476	0.00781598	0.0102089
194.16	0.00393471	0.0072083	0.0100848
194.4	0.00414508	0.00764762	0.00989579
194.64	0.00389525	0.0071307	0.00992482
194.88	0.00384118	0.00755503	0.0101238
195.12	0.00401758	0.00744697	0.0102178
195.36	0.00419073	0.00758723	0.00989989
195.6	0.00451163	0.00747678	0.0104303
195.84	0.00414893	0.00743595	0.0104617
196.08	0.0041759	0.00729279	0.00980508
196.32	0.00394232	0.00751179	0.0103072
196.56	0.00425775	0.00720144	0.0101215
196.8	0.00421787	0.00753924	0.010319
197.04	0.00416604	0.00755313	0.0102968
197.28	0.00388525	0.00723623	0.0104829
197.52	0.00409962	0.00727422	0.0102597
197.76	0.00427746	0.00755271	0.010028
198	0.00418166	0.00743327	0.0102749
198.24	0.00372588	0.00763347	0.0101629
198.48	0.00386581	0.00706794	0.0102093
198.72	0.004096	0.00744342	0.0103034
198.96	0.00434588	0.00724522	0.0100505
199.2	0.00390387	0.00750719	0.00979811
199.44	0.00445318	0.00765509	0.0099138
199.68	0.00416933	0.00746319	0.0103752
199.92	0.00422309	0.00733202	0.0104258
200.16	0.00402758	0.00727088	0.0103715
200.4	0.0038802	0.00744811	0.0100848
200.64	0.00433546	0.0076938	0.0103666
200.88	0.00404636	0.00766892	0.00982471
201.12	0.00418113	0.00718652	0.00997564
201.36	0.00403319	0.00761397	0.0104229
201.6	0.00437115	0.00710462	0.0106336
201.84	0.00417028	0.0076531	0.0103893
202.08	0.0038635	0.00754597	0.0103506
202.32	0.00374109	0.00757442	0.0106601
202.56	0.00424951	0.00750129	0.0102895
202.8	0.00402849	0.0077568	0.0103707
203.04	0.00406173	0.00724568	0.0102087
203.28	0.0042592	0.00714966	0.0103712
203.52	0.00428459	0.00703702	0.0103081
203.76	0.0041595	0.00722283	0.0104461
204	0.00375906	0.00719785	0.0103211
204.24	0.0038409	0.00733059	0.0106799
204.48	0.00429273	0.00737982	0.0102564
204.72	0.00409593	0.00750488	0.0104014
204.96	0.00410838	0.00705659	0.0104448
205.2	0.00433571	0.00711368	0.0103264
205.44	0.00414705	0.00698493	0.00981936
205.68	0.00410453	0.00770003	0.0106094
205.92	0.00389397	0.00721955	0.0101746
206.16	0.00389524	0.00765826	0.0103432
206.4	0.00404792	0.0073589	0.0103806
206.64	0.00414396	0.00812329	0.010384
206.88	0.00429601	0.00725643	0.0106345
207.12	0.00417712	0.00717409	0.0104649
207.36	0.00400105	0.00687682	0.0107807
207.6	0.00408246	0.00783638	0.010373
207.84	0.00409053	0.00771096	0.0108324
208.08	0.00368694	0.0073603	0.0106148
208.32	0.00388215	0.00720979	0.0106298
208.56	0.0039874	0.0070469	0.0103462
208.8	0.00390178	0.00736056	0.0105416
209.04	0.00402481	0.00759103	0.010738
209.28	0.00425987	0.00730174	0.0109847
209.52	0.00400505	0.00695128	0.01064
209.76	0.00402864	0.00746017	0.010595
210	0.00426854	0.00761697	0.0104206
210.24	0.00416175	0.0072353	0.010564
210.48	0.00411894	0.00747137	0.010064
210.72	0.00421481	0.00723931	0.0103294
210.96	0.00396596	0.00744352	0.0104919
211.2	0.00387726	0.00757792	0.0111763
211.44	0.00412375	0.00729806	0.0103497
211.68	0.00419789	0.00739744	0.0105333
211.92	0.00398918	0.00740316	0.010382
212.16	0.00416113	0.00768963	0.010613
212.4	0.00424901	0.00750283	0.0105593
212.64	0.00403928	0.00698638	0.0108482
212.88	0.00387329	0.00730915	0.0108531
213.12	0.00399102	0.00729667	0.0107749
213.36	0.00415162	0.00727182	0.0107357
213.6	0.00383336	0.00728153	0.0106643
213.84	0.00425956	0.00687004	0.0103343
214.08	0.00407628	0.00661175	0.0105991
214.32	0.0039967	0.00747501	0.0104869
214.56	0.0040734	0.00752252	0.0105951
214.8	0.00403648	0.00693406	0.0106284
215.04	0.00416065	0.00696645	0.0106487
215.28	0.00402769	0.00745421	0.0107776
215.52	0.00376037	0.00705241	0.0104645
215.76	0.00402323	0.00723974	0.0107179
216	0.00358623	0.00736207	0.0106062
216.24	0.00398138	0.00743889	0.0105098
216.48	0.00409114	0.00705309	0.0106187
216.72	0.00393248	0.00730109	0.0107215
216.96	0.00369788	0.00726496	0.0105491
217.2	0.00408387	0.00730341	0.0106536
217.44	0.00417211	0.0067137	0.0109854
217.68	0.00417364	0.00688426	0.0107406
217.92	0.00400548	0.00718711	0.0105588
218.16	0.00387526	0.00763325	0.0108763
218.4	0.00403263	0.00712658	0.0104021
218.64	0.0039436	0.0073456	0.0108299
218.88	0.00400765	0.00666539	0.0103866
219.12	0.0039779	0.00687312	0.0109621
219.36	0.00397537	0.00749356	0.0110331
219.6	0.00390532	0.00715161	0.0106512
219.84	0.00387197	0.00719503	0.0107669
220.08	0.00426312	0.0070867	0.0107941
220.32	0.00396035	0.00735536	0.010602
220.56	0.00418797	0.00688198	0.0105015
220.8	0.00382555	0.00656158	0.0109142
221.04	0.00378933	0.00697069	0.0107655
221.28	0.00377509	0.00702126	0.0108619
221.52	0.00350916	0.00725775	0.0107598
221.76	0.00413825	0.00707653	0.010759
222	0.00412826	0.00699759	0.0108984
222.24	0.00366278	0.00702661	0.0105646
222.48	0.00342303	0.00724853	0.010796
222.72	0.00395083	0.00713853	0.0110314
222.96	0.00380301	0.00684129	0.0107688
223.2	0.00398389	0.00709957	0.0106838
223.44	0.00384458	0.00670122	0.0107681
223.68	0.00398642	0.00693866	0.0108755
223.92	0.00392955	0.00655178	0.0106109
224.16	0.00371708	0.00676632	0.0105097
224.4	0.00401442	0.00697319	0.0108027
224.64	0.00377605	0.00702969	0.0106431
224.88	0.00383854	0.00648127	0.0108494
225.12	0.00411768	0.00665048	0.0111644
225.36	0.00392545	0.0069602	0.0109863
225.6	0.00377242	0.00706962	0.0108909
225.84	0.00387997	0.00708226	0.0109287
226.08	0.00369446	0.00667179	0.0105799
226.32	0.0043465	0.00672219	0.0108588
226.56	0.00389978	0.00693751	0.0106241
226.8	0.00361154	0.00682017	0.0105846
227.04	0.00393064	0.00690797	0.010377
227.28	0.00351375	0.00662981	0.0108307
227.52	0.00376285	0.00682881	0.0106433
227.76	0.0039952	0.00684152	0.0106999
228	0.00397858	0.00697064	0.0108707
228.24	0.00386517	0.00695042	0.0109765
228.48	0.00388446	0.00699302	0.0108585
228.72	0.0040519	0.00694287	0.0107087
228.96	0.00354539	0.00707289	0.0105075
229.2	0.00413786	0.0067109	0.0109781
229.44	0.00354525	0.00721739	0.011298
229.68	0.00380682	0.00696051	0.0108805
229.92	0.00394663	0.00710387	0.0108913
230.16	0.00407688	0.00701078	0.0107914
230.4	0.00387021	0.00675454	0.0109862
230.64	0.0039857	0.00727049	0.0111414
230.88	0.00380973	0.00709483	0.0103141
231.12	0.00408483	0.0070282	0.0108552
231.36	0.00404957	0.0066095	0.0109137
231.6	0.00373899	0.00642453	0.0109359
231.84	0.00372169	0.00714887	0.0108594
232.08	0.00410089	0.00667312	0.0109628
232.32	0.00361776	0.00697568	0.0106791
232.56	0.00379604	0.0068217	0.0105618
232.8	0.0036171	0.00709228	0.0107689
233.04	0.00365789	0.00639258	0.0108951
233.28	0.00359873	0.00696007	0.0106798
233.52	0.0036361	0.00662389	0.0110322
233.76	0.00362109	0.00689502	0.0110859
234	0.00350633	0.00738107	0.011065
234.24	0.00396094	0.00648437	0.0111252
234.48	0.00360995	0.00735809	0.0108184
234.72	0.00357146	0.00686995	0.0108782
234.96	0.00368237	0.00616154	0.0105364
235.2	0.00399934	0.00700693	0.0110024
235.44	0.00383238	0.00659184	0.011116
235.68	0.00368155	0.00671173	0.0109102
235.92	0.00386055	0.00726322	0.0114407
236.16	0.00365718	0.00690839	0.0110177
236.4	0.00371745	0.00656766	0.0109416
236.64	0.003766	0.0065123	0.0109757
236.88	0.00384433	0.00741462	0.0109448
237.12	0.00383663	0.00713158	0.0109902
237.36	0.00384091	0.00693855	0.0107732
237.6	0.0034917	0.0067662	0.0110223
237.84	0.00345564	0.00642345	0.0110296
238.08	0.00350552	0.00648477	0.0108987
238.32	0.00365711	0.00666411	0.0109142
238.56	0.00366326	0.00613972	0.0109532
238.8	0.00372005	0.00663706	0.0110973
239.04	0.00370387	0.00672939	0.01105
239.28	0.00343485	0.0064949	0.0108883
239.52	0.00394639	0.00642484	0.0110154
239.76	0.00340843	0.00679576	0.0108168

## Sheet: Control
Time	Exp1	Exp2	Exp3
0	0.000189	8.15e-05	0.000218
0.24	0.000358	3.74e-05	0.000169
0.48	0.000387	0.000287	0.000104
0.72	0.000501	-3.3e-05	9e-05
0.96	0.000254	3.23e-05	-0.00013
1.2	0.000328	-4.4e-05	-7.1e-05
1.44	0.000252	-0.0003	0.000348
1.68	-1.1e-06	-5.2e-05	-7e-05
1.92	0.000514	-0.00012	-0.00036
2.16	0.000296	0.000286	0.000283
2.4	3.25e-05	0.000196	0.00012
2.64	8.51e-05	-0.00024	8.31e-05
2.88	3.58e-05	-0.00046	6.38e-05
3.12	0.000576	-0.00021	8.71e-05
3.36	0.000207	0.000132	0.000213
3.6	0.000155	-0.00035	0.000258
3.84	-2.9e-05	0.000286	-0.00017
4.08	5.43e-05	-0.00018	0.00019
4.32	0.000384	0.000247	3.66e-05
4.56	5.73e-05	0.000318	5.3e-05
4.8	0.000175	-0.00023	-6.2e-05
5.04	0.000342	-0.0003	-0.00023
5.28	9.77e-05	0.000202	0.000378
5.52	0.000211	0.000222	9.77e-05
5.76	7.34e-05	0.00039	-2.6e-05
6	0.000251	0.000129	-0.00013
6.24	0.000114	-0.00024	-5.8e-05
6.48	0.000397	-6.7e-05	0.000411
6.72	0.000239	-0.00024	-0.00021
6.96	0.000274	-0.00015	0.000132
7.2	6.58e-05	0.000216	0.000191
7.44	0.000228	-2.7e-05	2.84e-06
7.68	8.28e-05	2.86e-05	0.000134
7.92	6.25e-05	-0.00024	5.43e-05
8.16	0.000107	0.000357	0.000291
8.4	0.00023	-8.6e-05	-9.6e-05
8.64	0.000133	0.000126	-4.6e-05
8.88	0.00019	5.94e-05	-6.8e-05
9.12	0.000287	-8.9e-05	1.26e-05
9.36	1.06e-05	6.13e-05	2.87e-05
9.6	8.07e-05	-0.00024	-9.8e-05
9.84	8.29e-05	3.76e-05	-0.00014
10.08	0.000262	5.88e-05	-0.0001
10.32	0.000237	-8.9e-05	0.000167
10.56	0.000178	0.000235	-0.0002
10.8	0.000173	-8.3e-05	-0.00017
11.04	0.000142	-0.0003	-6.2e-06
11.28	-0.0002	-0.00013	-0.00019
11.52	0.000464	-0.0002	0.000155
11.76	0.00019	-1.4e-05	2.12e-05
12	5.57e-05	-1.2e-05	0.000246
12.24	0.00027	0.000338	4.4e-05
12.48	-1.9e-05	0.000145	-0.00029
12.72	0.000291	-3.8e-05	-0.0002
12.96	-8.3e-05	-0.00041	8.57e-05
13.2	-3.5e-05	-0.00015	0.00029
13.44	7.24e-05	0.000249	0.000355
13.68	-0.00012	-4.1e-05	0.000195
13.92	-2.1e-05	-6.1e-05	2.39e-05
14.16	-5.7e-05	-0.00014	-2.5e-05
14.4	-0.00021	-0.00017	-0.00022
14.64	-0.00035	-0.00021	0.000192
14.88	-8.5e-05	0.000146	7.81e-05
15.12	-0.00012	0.000158	-7.6e-05
15.36	4.64e-07	-0.00023	0.000176
15.6	-0.00017	-0.00015	0.000176
15.84	0.000104	1.12e-05	-0.00025
16.08	3.88e-05	0.000132	-0.00017
16.32	2.69e-05	0.000279	-0.00024
16.56	7.87e-05	0.000247	-6.1e-05
16.8	-5.5e-05	-0.00016	5.9e-05
17.04	-0.00017	-3.4e-05	0.000177
17.28	3.17e-05	-7.2e-05	0.000202
17.52	-8.7e-05	-7.6e-05	-0.00014
17.76	-0.00012	0.000111	-9.6e-05
18	-6.6e-05	-3.1e-05	2.19e-05
18.24	0.000128	0.00034	-5.4e-05
18.48	-1.1e-05	0.000333	-0.00017
18.72	0.000325	0.000236	6.54e-05
18.96	6.02e-05	1.01e-05	0.000302
19.2	-9.9e-05	0.000181	-9.7e-05
19.44	-9.2e-05	-0.00022	2.04e-05
19.68	-0.00053	-0.00022	8.66e-05
19.92	-0.00038	0.00013	-0.00027
20.16	-0.00015	0.000297	9.97e-05
20.4	-0.00014	0.000162	3.73e-05
20.64	2.05e-05	0.000194	-0.00024
20.88	5.49e-05	-3.4e-05	-0.00025
21.12	-0.00025	-0.00016	2.55e-05
21.36	-8.6e-05	0.00012	-2.9e-05
21.6	-0.00016	0.000412	-9.6e-06
21.84	-0.00015	-0.00053	-9.9e-05
22.08	-0.00031	-0.00011	9.71e-05
22.32	6.51e-05	0.000263	8.92e-05
22.56	-0.0003	-0.00016	0.000172
22.8	7.57e-05	-0.00013	-0.00017
23.04	-0.00027	0.000218	-0.00015
23.28	-0.00025	0.00025	6.6e-05
23.52	0.000124	-3.1e-05	9.04e-05
23.76	-0.0002	-2.8e-05	-0.00024
24	-0.00013	4.75e-06	7.21e-05
24.24	-5e-05	-0.00011	-1.9e-05
24.48	-0.00027	5.68e-05	-0.00028
24.72	-0.00038	-0.00018	0.000392
24.96	-0.0001	-0.00021	0.000177
25.2	-7e-05	-0.00011	-3.3e-05
25.44	-0.00015	0.000312	0.000203
25.68	-6.3e-05	-9.9e-05	-0.00015
25.92	-0.0003	3.81e-05	-6.6e-05
26.16	-0.00037	-0.00037	0.0002
26.4	-0.0003	2.66e-05	-0.00015
26.64	-0.00018	-7.3e-05	-6.8e-05
26.88	-0.00024	-3.5e-05	-9.1e-05
27.12	-0.00053	-0.00011	-0.00026
27.36	-0.00037	-8.4e-05	-0.00017
27.6	-0.00021	-3.9e-05	-0.00014
27.84	-0.00036	6.18e-05	-0.00025
28.08	-0.00016	0.000142	-0.00014
28.32	-0.00027	0.000434	-0.00014
28.56	-0.00022	5.88e-05	-9.3e-05
28.8	-0.00021	-0.00037	-5.2e-06
29.04	-0.00013	-0.00019	-1.4e-05
29.28	-0.00046	5.89e-05	5.85e-05
29.52	-0.00054	9.54e-05	-0.00034
29.76	-0.00041	3.12e-05	-0.00041
30	-0.0003	0.000124	-0.00036
30.24	9.29e-05	0.000293	3.58e-05
30.48	-0.0002	-0.00032	-0.00016
30.72	-0.00989	-0.00628	-0.00718
30.96
31.2	-0.05213	-0.0374	-0.03989
31.44	0.10838	0.086879	0.089358
31.68
31.92	-0.00025	7.9e-05	0.000113
32.16	-0.00029	7.97e-05	-0.00027
32.4	-0.00034	-4.1e-05	-0.00017
32.64	-0.00042	-0.00012	-0.00015
32.88	-0.00024	-0.00025	2.86e-05
33.12	-0.00036	-5.4e-05	-1.2e-05
33.36	-0.00038	0.000327	-8.8e-05
33.6	-0.00043	0.000131	0.000343
33.84	-0.00023	-0.00011	-8.1e-05
34.08	-0.00035	-0.00011	-0.00038
34.32	-0.00023	0.000171	-1.7e-05
34.56	-0.00055	-0.00021	-0.00038
34.8	-0.00041	0.00022	-9.6e-05
35.04	-0.00069	-0.00015	-0.00011
35.28	-0.00055	-0.00022	-0.00038
35.52	-0.00046	-2.9e-05	-0.00014
35.76	-0.00062	1.63e-05	4.03e-06
36	-0.00035	-0.00035	-0.00017
36.24	-0.00021	-8.3e-05	-0.00035
36.48	-0.00036	0.000242	-8.9e-05
36.72	-0.00055	2.2e-05	9.05e-05
36.96	-0.00043	8.67e-05	-4.1e-05
37.2	-0.00038	1.06e-05	-0.00023
37.44	-0.00053	-0.00023	-0.00025
37.68	-0.00066	0.000114	-0.00028
37.92	-0.00052	-0.00011	0.000162
38.16	-0.00031	-0.0001	-0.0001
38.4	-0.00031	6.5e-06	-0.00015
38.64	-0.00056	-0.00011	7.62e-05
38.88	-0.00064	-0.00022	-0.00012
39.12	-0.00051	8.62e-07	-0.00019
39.36	-0.00032	2.53e-05	-1.2e-05
39.6	-0.0002	-0.00018	-8e-05
39.84	-0.00044	-0.00017	8e-05
40.08	-0.0003	0.000338	-0.00023
40.32	-0.00032	-8.9e-05	-0.00021
40.56	-0.00068	1.01e-05	-0.00031
40.8	-0.00041	-1.4e-05	2.83e-05
41.04	-0.00049	-0.00034	-0.00025
41.28	-0.0004	0.000144	0.000125
41.52	-0.0005	5.23e-05	-0.00016
41.76	-0.00029	-0.0002	-1.7e-06
42	-0.00085	0.000149	1.41e-05
42.24	-0.00059	0.000138	-1.7e-05
42.48	-0.00063	0.000176	-0.00012
42.72	-0.00034	3.29e-06	-2e-05
42.96	-0.00071	0.000147	-0.00023
43.2	-0.00026	-0.00021	6.86e-06
43.44	-0.00039	-3.4e-05	-0.00023
43.68	-0.00038	-0.00018	-0.0001
43.92	-0.00047	8.41e-05	5.49e-05
44.16	-0.00076	8.86e-05	-0.00021
44.4	-0.00073	0.000152	-0.00029
44.64	-0.0004	-9.7e-06	-0.00017
44.88	-0.00051	0.000184	-2.6e-05
45.12	-0.00065	0.000144	0.000129
45.36	-0.0006	0.000191	1.06e-05
45.6	-0.00038	-2.3e-05	-3.5e-05
45.84	-0.00046	-1.9e-05	-0.00028
46.08	-0.00052	0.000205	1.74e-05
46.32	-0.00054	0.000179	-0.00028
46.56	-0.00043	0.000103	-0.00017
46.8	-0.00066	4.05e-05	-0.0003
47.04	-0.00084	8.02e-05	7.92e-05
47.28	-0.00048	-0.00013	-0.0003
47.52	-0.00058	-0.00011	8.53e-05
47.76	-0.00062	-8.7e-05	-6.2e-05
48	-0.00057	6.84e-05	-0.0001
48.24	-0.00052	9.68e-05	-0.00027
48.48	-0.00058	-0.00026	-0.00034
48.72	-0.00064	-0.00017	-8.6e-05
48.96	-0.00086	-7e-05	-0.00024
49.2	-0.00068	0.000432	-0.00016
49.44	-0.00046	-9.7e-05	-9.2e-05
49.68	-0.0009	-0.00024	-0.00033
49.92	-0.00074	-8.2e-05	1.06e-05
50.16	-0.00075	-0.00023	-5.6e-05
50.4	-0.0008	-0.00022	-8e-05
50.64	-0.00075	-0.00025	-0.00033
50.88	-0.00059	-8.5e-05	-0.00035
51.12	-0.00066	7.65e-05	-0.00031
51.36	-0.00076	-1.2e-05	-8.6e-06
51.6	-0.00071	-0.0001	0.000105
51.84	-0.00063	-0.00016	-0.00031
52.08	-0.00067	-0.00019	-0.00031
52.32	-0.00068	-0.00031	9.17e-05
52.56	-0.00089	0.000186	-0.00015
52.8	-0.00063	-6.3e-05	-0.00015
53.04	-0.00046	3.62e-06	-6.9e-05
53.28	-0.00068	-0.0001	-0.00043
53.52	-0.00069	-0.00032	-3.4e-05
53.76	-0.00092	-1.3e-05	-4.7e-05
54	-0.00088	-0.00022	-0.00013
54.24	-0.00066	-0.00037	-9.7e-05
54.48	-0.00081	-0.00029	-0.00022
54.72	-0.00074	-1.9e-06	-8.6e-05
54.96	-0.00081	0.000121	-0.0002
55.2	-0.0007	8.57e-05	-1.7e-06
55.44	-0.00093	-0.0002	-0.00021
55.68	-0.00062	-0.00017	-0.00044
55.92	-0.00089	4.57e-05	-4.3e-05
56.16	-0.00088	-2.8e-05	-0.00047
56.4	-0.00101	-2.4e-05	-0.00036
56.64	-0.00096	-0.00033	-0.00016
56.88	-0.00076	-0.00014	-0.00035
57.12	-0.00082	-9.4e-05	-0.00022
57.36	-0.00091	-0.00022	-0.00011
57.6	-0.00074	0.00017	-0.00021
57.84	-0.00091	-0.00011	0.000194
58.08	-0.00055	-0.0001	-7.4e-05
58.32	-0.00062	5.05e-05	0.000142
58.56	-0.00097	-0.00027	0.000172
58.8	-0.00073	-0.00018	-0.0008
59.04	-0.00093	-9e-05	-0.00035
59.28	-0.00056	-8e-05	-0.00039
59.52	-0.00093	-5.4e-05	-0.00016
59.76	-0.00087	-9.7e-05	0.000159
60	-0.00094	8.19e-05	-0.00016
60.24	-0.0009	8.17e-05	-8.4e-06
60.48	-0.00092	-0.00023	-0.0001
60.72	-0.00069	-0.0001	2.96e-05
60.96	-0.00082	-0.00019	-3.8e-06
61.2	-0.001	-0.0004	-0.00015
61.44	-0.00097	-1.2e-06	-3.7e-05
61.68	-0.00103	0.00012	-0.00011
61.92	-0.00089	2.28e-05	2.04e-05
62.16	-0.00092	0.000161	-0.00027
62.4	-0.00057	-0.00029	0.000144
62.64	-0.00097	-0.00017	-0.00042
62.88	-0.00108	-0.00012	-2.8e-05
63.12	-0.00089	-6.4e-05	-3.4e-05
63.36	-0.00094	-0.00026	-0.00029
63.6	-0.00092	-9.3e-05	-0.00013
63.84	-0.00099	0.000354	-0.00048
64.08	-0.00075	-0.00014	-0.00027
64.32	-0.00099	-0.00033	-0.00022
64.56	-0.00086	-5.5e-05	-0.00025
64.8	-0.00095	0.000133	-0.00037
65.04	-0.00079	-0.0002	-0.00011
65.28	-0.0012	0.000193	-9.7e-05
65.52	-0.00088	-3.4e-05	-0.00044
65.76	-0.00094	1.24e-05	-0.00015
66	-0.00068	-0.00028	-0.00047
66.24	-0.00081	-3e-05	-8.1e-05
66.48	-0.00114	-0.00019	-0.00023
66.72	-0.0009	-0.00011	-0.0003
66.96	-0.00098	0.000145	-0.00015
67.2	-0.00121	0.000155	-5.7e-05
67.44	-0.00082	7.66e-05	-0.00013
67.68	-0.00101	-9.3e-05	-0.00014
67.92	-0.00092	-0.0002	-0.00034
68.16	-0.0011	-0.00034	-4.1e-05
68.4	-0.00094	-0.00019	-0.00057
68.64	-0.00092	4.71e-05	-8.7e-05
68.88	-0.00114	-0.00032	-0.00023
69.12	-0.00109	-0.00051	-0.00018
69.36	-0.0009	-9.1e-05	-0.0004
69.6	-0.00088	-0.00028	-0.00014
69.84	-0.00107	-0.00018	-0.00016
70.08	-0.00102	-0.00013	-8.1e-06
70.32	-0.00094	-0.00043	-0.00046
70.56	-0.00093	-0.00027	-0.00025
70.8	-0.0011	-0.00014	-0.00031
71.04	-0.00064	-0.00024	-4.3e-05
71.28	-0.00088	1.07e-05	1.78e-05
71.52	-0.00135	0.000137	-0.0004
71.76	-0.00111	6.21e-05	-0.00023
72	-0.00093	-0.00026	-9.5e-05
72.24	-0.0012	0.000256	-0.00043
72.48	-0.00111	-7.4e-05	-0.0006
72.72	-0.001	-0.00026	-0.00014
72.96	-0.00127	0.000181	-0.00059
73.2	-0.00095	0.000284	-7.9e-05
73.44	-0.00124	0.000169	0.000132
73.68	-0.00129	0.000236	1.68e-05
73.92	-0.00126	1.55e-05	-0.0002
74.16	-0.00136	-2.9e-06	-0.00014
74.4	-0.00129	-0.0003	-0.00022
74.64	-0.00105	0.000249	-3.8e-05
74.88	-0.00118	-3.1e-05	-0.00056
75.12	-0.00131	-0.0001	-0.00035
75.36	-0.00102	-0.00029	-0.00014
75.6	-0.00126	4.14e-06	-0.00023
75.84	-0.00137	-0.00014	4.17e-05
76.08	-0.001	0.000179	-0.00036
76.32	-0.0013	-0.00021	-0.00025
76.56	-0.0013	-8.9e-05	-0.0003
76.8	-0.00135	-0.00011	-0.00018
77.04	-0.00131	-6.9e-05	-0.0003
77.28	-0.00102	-0.00028	-0.00035
77.52	-0.00104	-0.0003	-0.00011
77.76	-0.00103	0.00015	-5.1e-05
78	-0.00139	-1.9e-05	9.88e-06
78.24	-0.00069	-0.00021	-0.00044
78.48	-0.00094	0.000157	-7.6e-05
78.72	-0.00124	4.49e-05	-9.4e-05
78.96	-0.00133	4.7e-05	-3.4e-05
79.2	-0.00137	-0.00026	-1.4e-05
79.44	-0.00122	-3.8e-05	-0.0003
79.68	-0.00128	-5.8e-05	-0.00041
79.92	-0.00106	0.000119	-0.0004
80.16	-0.0012	0.000418	-0.00059
80.4	-0.00109	0.000102	-0.00037
80.64	-0.00124	-0.0001	-0.00017
80.88	-0.00128	-1e-05	-0.00084
81.12	-0.0009	0.000156	-6.9e-05
81.36	-0.00137	-0.00017	-0.00042
81.6	-0.00127	-7e-05	-0.00016
81.84	-0.00123	-5.7e-05	-6.4e-05
82.08	-0.00113	0.000182	-0.00042
82.32	-0.00145	5.92e-05	-6.4e-05
82.56	-0.0014	-0.00011	-0.00023
82.8	-0.00132	-2.3e-05	-0.00047
83.04	-0.00137	-0.00011	-0.00029
83.28	-0.00118	-3.2e-05	-0.00046
83.52	-0.00126	-0.00016	-0.0004
83.76	-0.00088	1.22e-05	-0.00025
84	-0.00154	-0.00019	-0.00025
84.24	-0.00141	-0.00016	-0.00046
84.48	-0.00122	-0.00014	-0.00033
84.72	-0.00111	-0.00026	-0.00049
84.96	-0.00127	-1.6e-05	-0.0002
85.2	-0.00127	-8e-05	-0.0002
85.44	-0.0016	0.000112	-0.00031
85.68	-0.00134	-0.00016	-0.00047
85.92	-0.00142	-3.3e-05	-0.00014
86.16	-0.0017	-6.9e-05	-0.00023
86.4	-0.00162	0.000101	-0.00044
86.64	-0.00156	6.24e-06	-0.00044
86.88	-0.00101	-0.00036	-0.00047
87.12	-0.00142	-0.00019	-0.0002
87.36	-0.00148	-3e-05	-0.00051
87.6	-0.00129	-0.00017	-0.00024
87.84	-0.00147	2.63e-05	-0.00019
88.08	-0.00132	-0.00033	-0.00012
88.32	-0.00151	0.000136	-0.00026
88.56	-0.00166	-0.00025	-0.00038
88.8	-0.00145	-0.00044	9.81e-05
89.04	-0.00165	-0.00027	-0.00063
89.28	-0.0013	-0.00014	-0.00032
89.52	-0.00126	-6.9e-05	-0.0002
89.76	-0.00157	-0.00027	-0.00038
90	-0.00159	7.61e-05	-0.00021
90.24	-0.00135	3.71e-05	-0.00028
90.48	-0.00159	5.49e-08	-0.00027
90.72	-0.00161	-0.00027	-9.3e-05
90.96	-0.00115	-5.7e-05	-0.0003
91.2	-0.00159	-0.00032	-0.00026
91.44	-0.0015	-9e-05	-0.00041
91.68	-0.0016	0.000193	-0.00061
91.92	-0.00177	-0.00027	0.000106
92.16	-0.00145	-0.00019	6.02e-05
92.4	-0.00157	-4.9e-05	-0.00068
92.64	-0.00174	9.96e-05	-0.00049
92.88	-0.0016	-0.00011	-0.00033
93.12	-0.00157	-0.0001	-0.00034
93.36	-0.00133	0.000123	-0.00032
93.6	-0.00161	-0.00029	-0.00018
93.84	-0.00156	8.82e-05	-0.00046
94.08	-0.00155	-0.00026	-0.00015
94.32	-0.00161	0.000214	-0.00045
94.56	-0.00145	9.45e-05	-0.00022
94.8	-0.00174	-0.00033	-0.00042
95.04	-0.00177	0.000259	-0.00035
95.28	-0.00136	-0.00024	-0.00032
95.52	-0.00166	0.000161	-0.00014
95.76	-0.00158	-7.8e-05	-9.1e-06
96	-0.00126	-0.00021	-4.4e-06
96.24	-0.00155	-0.0002	-0.00014
96.48	-0.00152	-5.7e-06	-0.0006
96.72	-0.00134	4.83e-05	-0.00024
96.96	-0.00164	-0.00016	-0.00026
97.2	-0.00146	0.000137	-0.00034
97.44	-0.00154	0.000668	-0.00035
97.68	-0.00169	-0.00016	-0.00039
97.92	-0.00142	0.000316	-0.00018
98.16	-0.00159	0.000163	-0.00043
98.4	-0.00174	-5.5e-05	-0.00044
98.64	-0.00151	0.000103	-0.00017
98.88	-0.00149	-0.0002	-0.00038
99.12	-0.00146	-0.00023	-0.0003
99.36	-0.00142	-0.00033	-0.00017
99.6	-0.00145	6.66e-06	-0.00039
99.84	-0.00174	0.000307	-0.00078
100.08	-0.00144	-0.00015	-0.0004
100.32	-0.00153	-6.4e-05	-0.00064
100.56	-0.00146	-0.00029	-0.0004
100.8	-0.00149	0.000353	-0.00041
101.04	-0.00177	-0.00013	-0.00044
101.28	-0.00156	-0.00024	-0.00033
101.52	-0.00174	6.75e-05	-0.00045
101.76	-0.00169	-0.00019	-0.00034
102	-0.00146	-0.0003	-0.0004
102.24	-0.0016	-0.00012	-0.00037
102.48	-0.00157	-0.00017	-0.00036
102.72	-0.00161	-0.00024	-0.00022
102.96	-0.00174	-0.00014	-0.00019
103.2	-0.00144	1.62e-05	-0.00025
103.44	-0.0015	-4.6e-05	-0.00022
103.68	-0.00136	-5e-05	-0.00022
103.92	-0.00154	-0.00018	-0.00059
104.16	-0.00168	-5.4e-05	-0.00032
104.4	-0.00189	1.67e-05	-0.00064
104.64	-0.00166	-5.1e-05	-0.00044
104.88	-0.00188	4.5e-06	-0.00039
105.12	-0.00165	-1.4e-05	-0.00042
105.36	-0.00169	-0.00038	-0.0004
105.6	-0.00186	-5.8e-05	-0.00033
105.84	-0.0017	-0.00012	-5.7e-05
106.08	-0.00161	2.73e-05	-0.00028
106.32	-0.00204	-9.7e-05	-0.00044
106.56	-0.00163	8.95e-05	-0.00057
106.8	-0.00179	-2.4e-05	-0.00055
107.04	-0.00172	1.98e-05	-0.00045
107.28	-0.00163	0.000219	-0.00035
107.52	-0.00169	9.45e-05	-9.5e-06
107.76	-0.00151	1.32e-05	-0.00023
108	-0.00183	-5.3e-05	-7.8e-05
108.24	-0.00159	1.61e-05	-0.00048
108.48	-0.00174	-5.4e-05	-0.00067
108.72	-0.0016	0.000103	-0.00039
108.96	-0.0016	0.000191	-0.00046
109.2	-0.00161	0.000167	-0.00031
109.44	-0.0019	0.000156	-0.00046
109.68	-0.00184	-0.00024	-0.00024
109.92	-0.00153	2.9e-05	-0.00036
110.16	-0.00168	1.17e-05	-0.00024
110.4	-0.00157	-0.00016	-0.00031
110.64	-0.00191	-0.0001	-0.00082
110.88	-0.0016	0.000182	-0.0004
111.12	-0.00183	-8.6e-05	-0.0004
111.36	-0.00169	0.000217	-0.00028
111.6	-0.00192	-7e-05	-0.00048
111.84	-0.00193	-4.3e-05	-0.00039
112.08	-0.00182	-0.0002	-0.00036
112.32	-0.00154	-9e-06	-0.00033
112.56	-0.00198	-6.4e-05	-0.00054
112.8	-0.00183	0.000217	-0.00027
113.04	-0.00187	-0.00023	-0.00051
113.28	-0.00184	4.67e-05	-0.00071
113.52	-0.00148	2.44e-05	-0.00036
113.76	-0.00202	-0.00014	-0.0005
114	-0.00162	0.000269	-0.00058
114.24	-0.00193	0.000194	-0.00014
114.48	-0.0017	-0.00016	-0.00039
114.72	-0.00177	0.00034	-0.00019
114.96	-0.00161	0.000217	-0.00057
115.2	-0.00175	-0.00011	-0.00047
115.44	-0.00156	-0.00016	-0.00053
115.68	-0.00217	0.000155	-0.00063
115.92	-0.00195	-7.6e-05	-0.00062
116.16	-0.00189	3.21e-05	-0.00027
116.4	-0.00192	-0.00035	-0.00058
116.64	-0.00194	1.57e-05	-0.00049
116.88	-0.00199	7.5e-05	-0.00031
117.12	-0.00179	-0.00043	-0.00046
117.36	-0.0017	0.000151	-0.00016
117.6	-0.00191	9.15e-05	-3e-05
117.84	-0.00165	-0.00021	-0.00033
118.08	-0.00183	-0.0003	-0.00051
118.32	-0.00173	-0.00054	-0.00021
118.56	-0.00176	-1.2e-05	-0.00063
118.8	-0.00195	-5e-05	-0.00045
119.04	-0.00205	5.76e-05	-0.00031
119.28	-0.00171	0.000211	-0.00013
119.52	-0.00177	-0.0002	-0.00064
119.76	-0.00146	0.000161	-0.00027
120	-0.00198	-0.0002	-0.0004
120.24	-0.00179	-0.00015	-0.00032
120.48	-0.00199	4.34e-05	-0.00012
120.72	-0.00202	-0.00012	-0.00038
120.96	-0.00212	-7.5e-05	-0.00013
121.2	-0.00194	-0.00015	-0.00054
121.44	-0.002	0.00023	-0.00056
121.68	-0.00185	-0.00011	-0.00041
121.92	-0.00191	-5.3e-05	-0.00041
122.16	-0.0023	-0.00041	-0.00062
122.4	-0.00206	-6.1e-05	-0.00041
122.64	-0.00185	-2.1e-05	-0.00062
122.88	-0.00192	-0.00024	-0.00038
123.12	-0.00175	3.64e-05	-0.00066
123.36	-0.00223	-0.00029	-0.00058
123.6	-0.00187	4.27e-05	-0.00015
123.84	-0.0019	-0.0002	-0.00051
124.08	-0.00196	-6.9e-05	-0.00052
124.32	-0.00198	-7e-05	-0.00045
124.56	-0.00216	1.35e-05	-0.00038
124.8	-0.00227	1.3e-06	-0.00033
125.04	-0.00203	-0.00041	-0.00051
125.28	-0.00201	-0.00024	-0.00051
125.52	-0.00203	-0.00023	-0.0006
125.76	-0.00204	-1.5e-05	-0.00057
126	-0.00206	0.00018	-0.00049
126.24	-0.00204	0.000199	-0.00075
126.48	-0.00212	2.15e-05	-0.00022
126.72	-0.00244	-0.0002	-0.00048
126.96	-0.0022	-7.8e-05	-0.00024
127.2	-0.00209	-0.00017	-0.00031
127.44	-0.00206	-0.00027	-0.00077
127.68	-0.00211	8.95e-05	-0.00058
127.92	-0.00201	4.84e-05	-0.00072
128.16	-0.00202	-9.8e-05	-0.00054
128.4	-0.00235	-0.00045	-0.00065
128.64	-0.00208	-0.00017	-0.00067
128.88	-0.00214	-0.00025	-0.00031
129.12	-0.00206	-3.2e-05	-0.00026
129.36	-0.00195	1.17e-05	-0.00019
129.6	-0.00193	-0.00014	-0.00064
129.84	-0.00217	-5.5e-05	-0.00064
130.08	-0.00184	-0.0003	-0.00065
130.32	-0.00209	5.2e-05	-0.00064
130.56	-0.0022	-0.00011	-0.00046
130.8	-0.00212	-6.8e-05	-0.00027
131.04	-0.00211	3.5e-05	-0.00079
131.28	-0.00191	-0.00011	-0.00081
131.52	-0.00216	0.000388	-0.00049
131.76	-0.00176	-0.00025	-0.00029
132	-0.00226	-0.0005	-0.00036
132.24	-0.00215	-2.3e-05	-0.00031
132.48	-0.00211	-0.00017	-0.00064
132.72	-0.00246	2.27e-05	-0.00058
132.96	-0.00193	-1.2e-05	-0.0004
133.2	-0.00237	-0.00027	-0.00045
133.44	-0.00218	-0.00012	-0.00065
133.68	-0.00205	-0.00028	-0.00048
133.92	-0.00201	-0.00021	-0.00057
134.16	-0.00207	0.000264	-0.00029
134.4	-0.00211	-2.5e-05	-0.00069
134.64	-0.00218	0.000398	-0.0003
134.88	-0.00196	-0.00029	-0.00012
135.12	-0.00209	-0.00011	-0.00066
135.36	-0.00215	-0.00035	-0.00068
135.6	-0.00206	-0.0001	-0.00036
135.84	-0.00202	-0.00042	-0.00048
136.08	-0.00214	-0.00038	-0.0005
136.32	-0.00224	0.000138	-0.00046
136.56	-0.00221	-0.00017	-0.00039
136.8	-0.00209	4.37e-05	-0.00045
137.04	-0.00238	5.89e-05	-0.00065
137.28	-0.00242	-0.00027	-0.00038
137.52	-0.00224	0.000178	-0.00076
137.76	-0.00204	0.000276	-0.00018
138	-0.00229	-8.4e-05	-0.0004
138.24	-0.00211	-1.6e-05	-0.00053
138.48	-0.00243	-0.00031	-0.00033
138.72	-0.00218	5.17e-05	-0.0006
138.96	-0.00215	6.73e-05	-0.00038
139.2	-0.00227	-0.00034	-0.00025
139.44	-0.00214	-3.3e-05	-0.00057
139.68	-0.00226	-0.00018	-0.00085
139.92	-0.00248	8.71e-05	-0.00069
140.16	-0.00241	1.6e-05	-0.00047
140.4	-0.00195	-0.0004	-0.00053
140.64	-0.00251	-6.9e-05	-0.0007
140.88	-0.002	-0.00021	-0.00045
141.12	-0.00191	7.7e-05	-0.00045
141.36	-0.00201	-2.5e-05	-0.00062
141.6	-0.00243	-0.00068	-0.00047
141.84	-0.00244	-0.00014	-0.00044
142.08	-0.0024	-0.00029	-0.00061
142.32	-0.00243	-8.2e-05	-0.00043
142.56	-0.00231	-0.00012	-0.00069
142.8	-0.00247	0.00024	-0.00045
143.04	-0.00243	2.24e-05	-0.00057
143.28	-0.00222	-0.00027	-0.00061
143.52	-0.00222	-0.00038	-0.00045
143.76	-0.00226	-6.8e-05	-0.00044
144	-0.00195	-0.00033	-0.00039
144.24	-0.00234	-0.0002	-0.00056
144.48	-0.00244	-0.00025	-0.00061
144.72	-0.00237	5.16e-05	-0.00066
144.96	-0.00254	-0.00023	-0.00045
145.2	-0.00211	4.06e-06	-0.00078
145.44	-0.00231	-0.00043	-0.00038
145.68	-0.00242	-0.00045	-0.0002
145.92	-0.00237	-0.00025	-0.00079
146.16	-0.00258	-5.6e-05	-0.00059
146.4	-0.00243	0.000175	-0.00037
146.64	-0.00242	-4.6e-05	-0.00042
146.88	-0.00253	-0.00023	-0.00044
147.12	-0.00237	-9.4e-05	-0.00069
147.36	-0.00241	9.86e-05	-0.0005
147.6	-0.00234	-0.00022	-0.00033
147.84	-0.00241	-0.00017	-0.00083
148.08	-0.00226	-0.00021	-0.00041
148.32	-0.00247	6.03e-05	-0.00071
148.56	-0.00247	-0.00028	-0.00033
148.8	-0.00243	-4.7e-05	-0.0008
149.04	-0.00239	0.000106	-0.00064
149.28	-0.00224	2.3e-06	-0.00052
149.52	-0.00263	-5.1e-05	-0.00034
149.76	-0.00251	0.000272	-0.00045
150	-0.00218	0.000241	-0.00036
150.24	-0.00249	-5.4e-05	-0.00032
150.48	-0.00223	0.000217	-5.6e-06
150.72	-0.01177	-0.00544	-0.00691
150.96	-0.06366	0.060069	0.032187
151.2	-0.05135	-0.03666	-0.03891
151.44	0.111681	0.096162	0.096162
151.68	0.010267	0.011019	0.011908
151.92	-0.00135	0.001467	0.001534
152.16	-0.00118	0.00221	0.001764
152.4	-0.00135	0.001856	0.001677
152.64	-0.0012	0.002091	0.002203
152.88	-0.00101	0.002113	0.002197
153.12	-0.00081	0.002247	0.002556
153.36	-0.0005	0.002306	0.002857
153.6	-0.00044	0.002637	0.002958
153.84	-0.00033	0.002902	0.002956
154.08	-0.00032	0.002854	0.003477
154.32	-0.00011	0.002977	0.003656
154.56	-0.00016	0.003058	0.003685
154.8	-0.00014	0.003089	0.003991
155.04	-3e-05	0.00351	0.003978
155.28	0.000268	0.00399	0.00393
155.52	3.79e-05	0.003972	0.004276
155.76	0.00017	0.003967	0.004302
156	0.000406	0.003946	0.004071
156.24	0.000434	0.004089	0.004547
156.48	0.000466	0.004403	0.004609
156.72	0.000764	0.004398	0.004819
156.96	0.000824	0.004317	0.004665
157.2	0.000664	0.004732	0.005137
157.44	0.000892	0.004512	0.005186
157.68	0.000911	0.004761	0.005389
157.92	0.001002	0.005001	0.005269
158.16	0.000941	0.004614	0.005273
158.4	0.001118	0.004856	0.005222
158.64	0.001241	0.005271	0.005394
158.88	0.001237	0.005602	0.00554
159.12	0.0015	0.005197	0.005868
159.36	0.001751	0.005002	0.006181
159.6	0.001269	0.00552	0.005762
159.84	0.00117	0.00538	0.005963
160.08	0.001628	0.005461	0.006049
160.32	0.001585	0.005681	0.006171
160.56	0.001515	0.005748	0.006226
160.8	0.001311	0.006067	0.00555
161.04	0.001938	0.006081	0.006269
161.28	0.00182	0.006189	0.006197
161.52	0.001926	0.006007	0.006588
161.76	0.002073	0.00604	0.006505
162	0.002119	0.00605	0.006445
162.24	0.001797	0.006153	0.006613
162.48	0.002108	0.006402	0.006242
162.72	0.002026	0.006421	0.006588
162.96	0.002158	0.006413	0.006365
163.2	0.002351	0.006044	0.006745
163.44	0.002011	0.00645	0.006586
163.68	0.002179	0.00648	0.006567
163.92	0.002194	0.00654	0.007235
164.16	0.002412	0.006357	0.006931
164.4	0.002316	0.006977	0.00686
164.64	0.002195	0.006416	0.007194
164.88	0.002401	0.006546	0.006863
165.12	0.002496	0.007102	0.006877
165.36	0.002371	0.006712	0.006839
165.6	0.002653	0.006598	0.007176
165.84	0.002787	0.006559	0.006896
166.08	0.002507	0.006999	0.007364
166.32	0.003004	0.007024	0.007627
166.56	0.002608	0.006943	0.007594
166.8	0.002704	0.007463	0.007213
167.04	0.002716	0.007514	0.007617
167.28	0.002685	0.006987	0.007238
167.52	0.002645	0.00724	0.007359
167.76	0.002948	0.007226	0.00751
168	0.002571	0.007069	0.007667
168.24	0.00288	0.007036	0.007609
168.48	0.003068	0.007446	0.007417
168.72	0.002896	0.007324	0.008112
168.96	0.00288	0.007153	0.007695
169.2	0.003106	0.007393	0.007674
169.44	0.003151	0.007475	0.007536
169.68	0.003008	0.007534	0.007989
169.92	0.003038	0.007697	0.007697
170.16	0.002868	0.007271	0.008004
170.4	0.003209	0.007965	0.007915
170.64	0.003271	0.007583	0.008242
170.88	0.003006	0.007471	0.007891
171.12	0.003499	0.007925	0.007948
171.36	0.003081	0.007796	0.008531
171.6	0.003151	0.007348	0.008041
171.84	0.003546	0.007868	0.008361
172.08	0.003003	0.008016	0.008473
172.32	0.003182	0.007516	0.00829
172.56	0.003166	0.007977	0.008241
172.8	0.003585	0.007762	0.00854
173.04	0.00324	0.00823	0.008348
173.28	0.003107	0.008169	0.00848
173.52	0.003481	0.008057	0.008807
173.76	0.003254	0.007718	0.008698
174	0.003522	0.008037	0.008439
174.24	0.003519	0.008197	0.008688
174.48	0.003486	0.007886	0.008725
174.72	0.003177	0.008228	0.008684
174.96	0.00375	0.008007	0.008775
175.2	0.003576	0.008578	0.008802
175.44	0.003555	0.008191	0.009113
175.68	0.003593	0.008102	0.009102
175.92	0.003384	0.008351	0.009071
176.16	0.003598	0.008422	0.008933
176.4	0.003432	0.008188	0.008899
176.64	0.003609	0.008866	0.009043
176.88	0.003638	0.008638	0.009034
177.12	0.003616	0.00901	0.009454
177.36	0.003798	0.008381	0.009064
177.6	0.003599	0.008591	0.009084
177.84	0.003767	0.008281	0.008857
178.08	0.003595	0.008409	0.008792
178.32	0.003794	0.008683	0.009396
178.56	0.003671	0.008535	0.009103
178.8	0.003692	0.008533	0.009105
179.04	0.003855	0.008374	0.009082
179.28	0.003748	0.008758	0.008965
179.52	0.003919	0.008398	0.009205
179.76	0.003788	0.00869	0.009032
180	0.003601	0.008715	0.009231
180.24	0.004093	0.008114	0.009217
180.48	0.003743	0.008808	0.00949
180.72	0.00385	0.008682	0.009446
180.96	0.00374	0.008846	0.009533
181.2	0.003657	0.008705	0.009307
181.44	0.003809	0.008776	0.009249
181.68	0.003612	0.008966	0.009355
181.92	0.003714	0.008773	0.009166
182.16	0.003932	0.008715	0.009302
182.4	0.003861	0.008608	0.009599
182.64	0.003876	0.008712	0.009742
182.88	0.004038	0.008765	0.009601
183.12	0.003642	0.008504	0.00972
183.36	0.004157	0.00897	0.009425
183.6	0.003849	0.009265	0.009104
183.84	0.003828	0.00847	0.009777
184.08	0.003737	0.008989	0.009671
184.32	0.003879	0.008917	0.009735
184.56	0.003915	0.009088	0.010062
184.8	0.003654	0.008983	0.009903
185.04	0.003882	0.0085	0.009619
185.28	0.00432	0.008983	0.009863
185.52	0.004086	0.009538	0.00961
185.76	0.003777	0.00882	0.009959
186	0.003881	0.008878	0.009478
186.24	0.003801	0.009406	0.010546
186.48	0.003886	0.009346	0.009421
186.72	0.003927	0.008895	0.009845
186.96	0.004119	0.009233	0.009805
187.2	0.00395	0.009218	0.009461
187.44	0.004086	0.009146	0.009748
187.68	0.004055	0.008403	0.00978
187.92	0.003868	0.009275	0.010197
188.16	0.003962	0.00939	0.009724
188.4	0.004234	0.009126	0.009908
188.64	0.004145	0.009238	0.010011
188.88	0.003972	0.009022	0.009994
189.12	0.004095	0.009233	0.010049
189.36	0.004334	0.009439	0.009835
189.6	0.003979	0.009381	0.009669
189.84	0.003777	0.009437	0.010052
190.08	0.00402	0.009249	0.00988
190.32	0.003864	0.009269	0.010046
190.56	0.004139	0.009145	0.010062
190.8	0.004293	0.009424	0.009914
191.04	0.003814	0.009061	0.01011
191.28	0.004045	0.009029	0.010282
191.52	0.004214	0.009122	0.010078
191.76	0.003986	0.009736	0.009818
192	0.004216	0.009664	0.01012
192.24	0.004057	0.009446	0.010311
192.48	0.003993	0.00927	0.010315
192.72	0.004042	0.009158	0.010244
192.96	0.003831	0.009561	0.010472
193.2	0.003777	0.009234	0.010339
193.44	0.003741	0.009482	0.010493
193.68	0.004165	0.00922	0.010044
193.92	0.004322	0.009182	0.01027
194.16	0.004208	0.009709	0.010547
194.4	0.004172	0.009844	0.010088
194.64	0.004197	0.009741	0.010488
194.88	0.004324	0.009564	0.010332
195.12	0.004198	0.009313	0.01045
195.36	0.004315	0.009567	0.010483
195.6	0.004166	0.009647	0.010282
195.84	0.004245	0.009403	0.010536
196.08	0.004199	0.00993	0.01029
196.32	0.003935	0.009545	0.010251
196.56	0.004145	0.009573	0.010504
196.8	0.004152	0.009625	0.010367
197.04	0.004191	0.009384	0.010585
197.28	0.004178	0.009591	0.010449
197.52	0.004178	0.009789	0.010706
197.76	0.004117	0.009792	0.01032
198	0.00449	0.009832	0.010438
198.24	0.004096	0.00998	0.010392
198.48	0.004393	0.009775	0.010747
198.72	0.004438	0.00948	0.010362
198.96	0.004112	0.00997	0.010545
199.2	0.004236	0.009976	0.010705
199.44	0.004186	0.009889	0.010417
199.68	0.004137	0.009609	0.01066
199.92	0.004338	0.010002	0.010397
200.16	0.004135	0.009679	0.01039
200.4	0.004341	0.009781	0.010775
200.64	0.004098	0.009919	0.01069
200.88	0.004223	0.009723	0.010577
201.12	0.004261	0.009954	0.01066
201.36	0.004193	0.00953	0.010511
201.6	0.004292	0.009677	0.010636
201.84	0.003741	0.009622	0.010694
202.08	0.0042	0.009589	0.010859
202.32	0.004062	0.009958	0.01096
202.56	0.004153	0.00984	0.010577
202.8	0.004269	0.009772	0.010879
203.04	0.004231	0.009694	0.011
203.28	0.004142	0.009995	0.010815
203.52	0.004135	0.009947	0.010689
203.76	0.003928	0.00999	0.010644
204	0.003901	0.010158	0.010915
204.24	0.004235	0.010266	0.011338
204.48	0.003965	0.009661	0.010698
204.72	0.003952	0.010302	0.011064
204.96	0.004495	0.010055	0.01082
205.2	0.004211	0.009849	0.011038
205.44	0.003896	0.009909	0.010854
205.68	0.004185	0.009637	0.010857
205.92	0.003915	0.009886	0.011141
206.16	0.004251	0.009891	0.01062
206.4	0.004115	0.009529	0.010791
206.64	0.004363	0.010017	0.010997
206.88	0.004373	0.009756	0.010911
207.12	0.004149	0.009871	0.010564
207.36	0.003898	0.009906	0.010678
207.6	0.004183	0.010016	0.010779
207.84	0.004453	0.009851	0.011236
208.08	0.004059	0.01007	0.011
208.32	0.004436	0.009891	0.011015
208.56	0.004421	0.00961	0.010853
208.8	0.003911	0.010425	0.010962
209.04	0.004205	0.010015	0.010831
209.28	0.00418	0.009835	0.010803
209.52	0.004036	0.009682	0.01107
209.76	0.004031	0.009904	0.011212
210	0.004184	0.009941	0.01099
210.24	0.004032	0.009649	0.011059
210.48	0.004226	0.00986	0.010796
210.72	0.004014	0.009983	0.011221
210.96	0.00406	0.010133	0.010919
211.2	0.004143	0.009898	0.011303
211.44	0.003838	0.010053	0.011225
211.68	0.004419	0.010173	0.011119
211.92	0.00431	0.010031	0.01116
212.16	0.004118	0.009913	0.0111
212.4	0.004133	0.009815	0.011259
212.64	0.004201	0.010319	0.011168
212.88	0.004213	0.010244	0.010934
213.12	0.004016	0.010002	0.011375
213.36	0.004284	0.010107	0.011121
213.6	0.004071	0.009829	0.010995
213.84	0.004529	0.009594	0.011076
214.08	0.004157	0.009734	0.011236
214.32	0.004047	0.009981	0.010947
214.56	0.003931	0.010331	0.010997
214.8	0.004104	0.0104	0.011135
215.04	0.004224	0.010049	0.010959
215.28	0.004173	0.010253	0.011412
215.52	0.00423	0.009913	0.010807
215.76	0.004023	0.010019	0.011492
216	0.004344	0.010011	0.011068
216.24	0.004085	0.010183	0.011048
216.48	0.003901	0.010129	0.011045
216.72	0.004259	0.010315	0.010924
216.96	0.004132	0.010141	0.011142
217.2	0.003995	0.009697	0.011234
217.44	0.004247	0.009836	0.011393
217.68	0.004155	0.010149	0.01136
217.92	0.004352	0.010113	0.011223
218.16	0.004009	0.010116	0.011138
218.4	0.004019	0.01027	0.011448
218.64	0.004329	0.010116	0.011142
218.88	0.003968	0.010011	0.011283
219.12	0.004066	0.010195	0.011204
219.36	0.004039	0.010293	0.011163
219.6	0.004231	0.009752	0.011347
219.84	0.003971	0.01011	0.010967
220.08	0.004275	0.010129	0.011157
220.32	0.004354	0.009644	0.011675
220.56	0.004167	0.010017	0.011345
220.8	0.004353	0.0099	0.011233
221.04	0.003833	0.010423	0.01099
221.28	0.004071	0.009977	0.011033
221.52	0.004134	0.010052	0.011035
221.76	0.0039	0.009901	0.011087
222	0.004252	0.010209	0.011331
222.24	0.004231	0.010085	0.011342
222.48	0.004458	0.010295	0.01147
222.72	0.00447	0.010044	0.011323
222.96	0.004043	0.010262	0.011304
223.2	0.004226	0.010068	0.010894
223.44	0.004186	0.010162	0.011104
223.68	0.004106	0.010137	0.011059
223.92	0.00396	0.009843	0.011415
224.16	0.004127	0.010381	0.011098
224.4	0.004193	0.010333	0.011467
224.64	0.004014	0.010195	0.011143
224.88	0.004479	0.010185	0.011159
225.12	0.004245	0.010212	0.011694
225.36	0.004149	0.009718	0.011307
225.6	0.004163	0.010086	0.011345
225.84	0.004262	0.010352	0.011002
226.08	0.003862	0.010321	0.011377
226.32	0.00391	0.009808	0.011746
226.56	0.00392	0.009926	0.011061
226.8	0.003922	0.009882	0.010976
227.04	0.004231	0.009909	0.011228
227.28	0.004185	0.010257	0.01143
227.52	0.003993	0.009894	0.011318
227.76	0.003896	0.009875	0.011353
228	0.004332	0.010044	0.011514
228.24	0.003782	0.0104	0.011084
228.48	0.004045	0.00978	0.011228
228.72	0.004087	0.01016	0.01112
228.96	0.004085	0.010182	0.01131
229.2	0.004063	0.010253	0.011285
229.44	0.00417	0.0101	0.011473
229.68	0.003986	0.009811	0.011743
229.92	0.004207	0.010115	0.011619
230.16	0.004002	0.009947	0.011082
230.4	0.00418	0.010314	0.011474
230.64	0.004005	0.0101	0.011184
230.88	0.004109	0.010088	0.011391
231.12	0.004133	0.00978	0.011427
231.36	0.00383	0.009864	0.011224
231.6	0.003737	0.010078	0.011746
231.84	0.004057	0.01023	0.011163
232.08	0.003758	0.010086	0.011485
232.32	0.004201	0.010468	0.011209
232.56	0.004259	0.010348	0.011363
232.8	0.004294	0.009611	0.011608
233.04	0.004002	0.010037	0.011627
233.28	0.004261	0.010391	0.011325
233.52	0.00386	0.009893	0.011523
233.76	0.0042	0.010284	0.01087
234	0.004042	0.009995	0.011402
234.24	0.004183	0.010068	0.011822
234.48	0.00423	0.010358	0.011293
234.72	0.003871	0.010493	0.011278
234.96	0.003938	0.010334	0.011528
235.2	0.004	0.010481	0.011412
235.44	0.00422	0.010516	0.011299
235.68	0.003751	0.01024	0.011004
235.92	0.003898	0.010414	0.011508
236.16	0.003871	0.010826	0.011382
236.4	0.003765	0.010052	0.011456
236.64	0.004205	0.009995	0.011131
236.88	0.004127	0.010106	0.011385
237.12	0.003925	0.010673	0.011275
237.36	0.004294	0.009939	0.011439
237.6	0.003875	0.010148	0.011663
237.84	0.004071	0.010724	0.011407
238.08	0.004149	0.010006	0.01139
238.32	0.004131	0.010157	0.011526
238.56	0.004129	0.010154	0.011769
238.8	0.003883	0.010079	0.011521
239.04	0.003932	0.009939	0.011659
239.28	0.004014	0.009993	0.011386
239.52	0.003835	0.010086	0.011577
239.76	0.003985	0.010181	0.011777

## Sheet: M4R
Time	Exp1	Exp2	Exp3
0	8.18e-05	4.05e-06	-3.7e-05
0.24	0.000431	-4e-05	0.000124
0.48	0.000334	0.000375	0.000105
0.72	0.000192	-0.00028	-0.00016
0.96	0.000265	7.95e-05	0.000193
1.2	0.000213	-0.00024	0.000167
1.44	8.82e-05	0.000104	-0.00011
1.68	0.000106	-1.3e-05	0.000293
1.92	0.000365	4.18e-05	0.000289
2.16	0.000461	0.000352	0.000118
2.4	0.000428	0.000308	0.000466
2.64	0.00053	-3.7e-05	2.23e-05
2.88	3.7e-05	2.28e-05	0.000276
3.12	0.000369	0.000242	-6.8e-05
3.36	0.000327	-0.00021	2.96e-05
3.6	0.000292	0.000165	-0.00037
3.84	0.000158	0.000151	0.000267
4.08	0.000207	-0.0003	-0.00025
4.32	0.000556	9.35e-05	9.33e-05
4.56	0.000306	-0.00011	-0.00021
4.8	7.21e-06	4.93e-05	7.3e-05
5.04	5.21e-05	0.000338	-0.00014
5.28	0.000444	6.48e-05	0.000154
5.52	5.63e-05	0.000173	-0.00014
5.76	2.51e-06	-0.00016	5.91e-05
6	-0.00016	-7.6e-05	0.0003
6.24	-2.5e-05	9.7e-05	-0.00022
6.48	9.06e-06	0.000221	-0.0001
6.72	0.000141	0.000449	-0.00011
6.96	0.000123	-0.00016	0.000156
7.2	-9.4e-05	0.000387	0.000104
7.44	0.000238	-0.00034	6.52e-05
7.68	4.88e-05	9.58e-05	0.000105
7.92	-6.7e-06	-7.9e-05	-0.00026
8.16	0.000514	4.31e-06	0.000274
8.4	0.000294	7.08e-05	0.000263
8.64	-1.9e-05	-0.00011	9.24e-05
8.88	5.07e-05	0.000277	-7.7e-05
9.12	-1.1e-05	9.41e-05	0.00038
9.36	-1.9e-05	-1.2e-05	0.000209
9.6	0.000144	8.4e-05	-0.0001
9.84	0.000211	0.0001	8.19e-05
10.08	0.000111	0.000209	0.000214
10.32	-5.2e-05	0.000103	4.14e-05
10.56	0.000185	-4e-05	0.000134
10.8	-0.00019	-0.00012	-0.00015
11.04	9.02e-05	0.000304	-0.00016
11.28	7.43e-05	0.000323	-0.00013
11.52	0.000299	0.000221	0.00059
11.76	-6e-06	-3.9e-05	-0.00011
12	4.77e-05	-0.0002	5.64e-05
12.24	-0.00012	-0.00021	0.0001
12.48	2.83e-05	-0.00013	8.81e-05
12.72	-4e-05	-0.00032	8.62e-06
12.96	8.79e-05	0.000129	-0.00017
13.2	0.000115	0.00016	-0.00019
13.44	0.000123	0.000108	0.000195
13.68	-3.7e-05	-1.9e-05	-0.00047
13.92	3.92e-05	8.04e-05	-0.00012
14.16	-0.00028	0.000137	1.07e-05
14.4	-8.3e-06	-0.00011	4.7e-05
14.64	-0.0001	0.000306	-7.1e-05
14.88	-4.3e-05	0.000115	-0.00011
15.12	-0.00018	-0.00013	-5.3e-05
15.36	-0.0002	-4.2e-05	0.000148
15.6	-0.00011	-0.0002	-7e-05
15.84	-2.4e-06	-0.00039	-0.0002
16.08	-1.1e-05	0.000172	7.13e-06
16.32	1.94e-06	1.61e-05	-0.00031
16.56	0.000138	-3e-05	-7.4e-05
16.8	-7.7e-05	6.49e-05	-0.00021
17.04	9.39e-05	0.000143	7.08e-05
17.28	-8.6e-06	-0.00019	3.17e-05
17.52	-8.3e-06	-9.5e-05	-9.7e-05
17.76	-0.00016	-6e-05	4.76e-05
18	-0.0001	-0.00047	0.000195
18.24	-0.00018	0.000213	9.59e-05
18.48	0.000158	-0.00021	-4e-06
18.72	-0.00016	2.56e-05	-5.2e-05
18.96	-0.00025	-0.0003	-4.1e-05
19.2	-6.8e-05	0.000175	-0.00036
19.44	-0.00013	-0.00032	-1.2e-05
19.68	-0.00025	-4.5e-05	1.76e-05
19.92	-5.8e-05	0.000102	0.00011
20.16	-0.00013	-0.00016	0.000295
20.4	1.54e-05	-0.00012	-0.0004
20.64	-0.00011	-0.0003	0.000278
20.88	0.000221	0.000239	-0.00015
21.12	-0.00021	-0.00011	0.000112
21.36	-2.1e-05	-0.00026	-0.00022
21.6	1.51e-05	-0.00011	8.38e-05
21.84	-0.00029	-0.0001	1.4e-05
22.08	-0.00021	3.28e-05	-4.9e-06
22.32	-0.00032	4.04e-05	2.73e-05
22.56	0.000114	-2.1e-05	8.19e-06
22.8	-2.6e-05	-4.2e-05	-6.1e-05
23.04	0.000167	-0.00032	-0.00043
23.28	-0.00058	3.68e-05	-3.5e-05
23.52	0.000144	0.000119	-3.4e-05
23.76	-0.00014	0.000103	6.09e-05
24	-1.5e-05	0.000216	-2.8e-05
24.24	-6.4e-05	8.3e-05	0.000319
24.48	-2.7e-05	-8.4e-05	-0.00011
24.72	-0.00019	0.000212	-0.00016
24.96	-0.00011	0.000201	4.84e-05
25.2	-0.00047	-0.00018	6.65e-05
25.44	-0.00015	-0.00015	2.06e-05
25.68	-8.7e-05	8.36e-05	9.65e-05
25.92	-0.00046	-0.00029	0.000139
26.16	-0.00023	-0.0002	0.000116
26.4	3.8e-05	0.000114	2.04e-05
26.64	-8.3e-05	-3e-05	-0.00017
26.88	-9.8e-05	-6.8e-05	-0.00017
27.12	-0.00035	-0.00032	-0.00013
27.36	-0.00024	-0.00022	-0.00042
27.6	-0.00024	0.000258	-0.00043
27.84	-0.00036	1.15e-05	-0.0002
28.08	-0.00031	-5.1e-05	0.000154
28.32	-0.00026	0.000155	-7.9e-05
28.56	-0.0002	-0.00014	-0.00014
28.8	-0.00043	3.72e-05	-0.00021
29.04	-9.1e-05	3.72e-05	-5.3e-05
29.28	-0.00018	-7.5e-05	7.2e-05
29.52	-0.00018	-0.00034	0.00014
29.76	-0.00034	1.97e-05	0.000101
30	5.95e-05	-6.3e-05	1.1e-05
30.24	-9.4e-05	0.000689	0.000197
30.48	0.000103	0.00028	1.34e-05
30.72	-0.00754	-0.00586	-0.00569
30.96	0.04651	0.034416	0.054068
31.2	-0.04555	-0.03842	-0.03707
31.44	0.113882	0.096129	0.093872
31.68
31.92	0.001251	0.001707	0.002022
32.16	0.001422	0.002018	0.00233
32.4	0.001666	0.002361	0.002913
32.64	0.001908	0.002642	0.003166
32.88	0.001762	0.003048	0.002974
33.12	0.00214	0.002901	0.002946
33.36	0.002259	0.003265	0.003696
33.6	0.002257	0.003378	0.003305
33.84	0.002504	0.003595	0.003627
34.08	0.002677	0.003916	0.003838
34.32	0.002904	0.004198	0.004379
34.56	0.002926	0.004485	0.004163
34.8	0.003224	0.004286	0.004374
35.04	0.003519	0.004779	0.004608
35.28	0.003273	0.004981	0.00469
35.52	0.00357	0.005003	0.004783
35.76	0.003397	0.005003	0.005001
36	0.00364	0.005347	0.005058
36.24	0.003949	0.00531	0.005245
36.48	0.004092	0.00523	0.005533
36.72	0.004014	0.005781	0.005876
36.96	0.004052	0.005882	0.005619
37.2	0.00405	0.005498	0.005415
37.44	0.004191	0.006061	0.005676
37.68	0.00442	0.006217	0.006148
37.92	0.004317	0.006371	0.005851
38.16	0.004527	0.006118	0.006177
38.4	0.004442	0.006552	0.006041
38.64	0.004545	0.006675	0.006576
38.88	0.005286	0.006764	0.006048
39.12	0.004928	0.007104	0.006681
39.36	0.005095	0.006982	0.006393
39.6	0.005074	0.007006	0.006683
39.84	0.00511	0.007155	0.006395
40.08	0.005062	0.00728	0.006784
40.32	0.004939	0.00761	0.006617
40.56	0.005084	0.006921	0.007043
40.8	0.005304	0.007265	0.006678
41.04	0.005422	0.007059	0.00657
41.28	0.005276	0.007872	0.006779
41.52	0.005423	0.007772	0.006986
41.76	0.005198	0.007552	0.007199
42	0.005616	0.007826	0.006947
42.24	0.005403	0.00765	0.007064
42.48	0.005794	0.007915	0.007301
42.72	0.005732	0.007964	0.007209
42.96	0.00597	0.007985	0.007686
43.2	0.005602	0.007983	0.007442
43.44	0.006033	0.008388	0.007297
43.68	0.005837	0.008133	0.007372
43.92	0.005978	0.008339	0.007239
44.16	0.0061	0.008021	0.007558
44.4	0.006041	0.008415	0.007363
44.64	0.006559	0.008223	0.007868
44.88	0.006132	0.008231	0.007579
45.12	0.006277	0.008474	0.007776
45.36	0.006079	0.00841	0.007797
45.6	0.006232	0.008542	0.007857
45.84	0.006309	0.008696	0.008161
46.08	0.006586	0.008702	0.008147
46.32	0.006271	0.00843	0.00793
46.56	0.006207	0.008921	0.007958
46.8	0.006412	0.008831	0.008173
47.04	0.006412	0.008669	0.008255
47.28	0.006608	0.009113	0.008195
47.52	0.00656	0.008744	0.008245
47.76	0.006326	0.008984	0.008342
48	0.006628	0.009044	0.008111
48.24	0.006309	0.009299	0.00883
48.48	0.00664	0.008866	0.008561
48.72	0.006734	0.009015	0.008312
48.96	0.006598	0.008803	0.008552
49.2	0.006671	0.008863	0.008584
49.44	0.006606	0.0094	0.008559
49.68	0.006965	0.009661	0.008746
49.92	0.0068	0.00945	0.008757
50.16	0.006982	0.009336	0.008596
50.4	0.006945	0.009401	0.008917
50.64	0.006965	0.009708	0.008694
50.88	0.006829	0.009143	0.008875
51.12	0.006988	0.009521	0.00882
51.36	0.007116	0.009806	0.009044
51.6	0.006925	0.009474	0.009259
51.84	0.007112	0.009895	0.008577
52.08	0.007279	0.009824	0.009197
52.32	0.006827	0.009517	0.009258
52.56	0.007006	0.009864	0.009169
52.8	0.007153	0.009882	0.009259
53.04	0.006728	0.009645	0.009238
53.28	0.007042	0.009725	0.008939
53.52	0.007059	0.009929	0.009462
53.76	0.007253	0.010104	0.009303
54	0.007437	0.009951	0.009436
54.24	0.007428	0.010124	0.009582
54.48	0.007033	0.010084	0.009396
54.72	0.00747	0.010056	0.009493
54.96	0.007396	0.010252	0.009606
55.2	0.007498	0.00992	0.009283
55.44	0.007421	0.009978	0.009449
55.68	0.007352	0.010043	0.009564
55.92	0.00734	0.010301	0.009285
56.16	0.007096	0.010246	0.009467
56.4	0.007374	0.010101	0.009951
56.64	0.007436	0.009685	0.009816
56.88	0.007282	0.010238	0.009725
57.12	0.007133	0.010341	0.009726
57.36	0.007257	0.010123	0.009511
57.6	0.007403	0.010358	0.009633
57.84	0.007435	0.010311	0.009778
58.08	0.007615	0.010497	0.009781
58.32	0.007224	0.010352	0.0099
58.56	0.007188	0.010682	0.0101
58.8	0.007812	0.010821	0.010029
59.04	0.007525	0.010141	0.009948
59.28	0.007456	0.010777	0.010134
59.52	0.007508	0.0107	0.010099
59.76	0.007494	0.010509	0.010025
60	0.007316	0.010915	0.009856
60.24	0.007465	0.010762	0.010117
60.48	0.007751	0.010502	0.010108
60.72	0.007667	0.010658	0.010164
60.96	0.007522	0.010924	0.010399
61.2	0.007776	0.010929	0.01028
61.44	0.007667	0.01024	0.010203
61.68	0.007883	0.011005	0.010377
61.92	0.007692	0.010484	0.010543
62.16	0.00782	0.010488	0.010296
62.4	0.007408	0.010444	0.010544
62.64	0.007623	0.011219	0.01054
62.88	0.00786	0.010949	0.010349
63.12	0.007847	0.010946	0.010378
63.36	0.007721	0.010405	0.010039
63.6	0.007826	0.011252	0.010633
63.84	0.007917	0.010839	0.010318
64.08	0.007615	0.010895	0.010488
64.32	0.007616	0.010601	0.010497
64.56	0.007603	0.010629	0.010884
64.8	0.00768	0.011145	0.010749
65.04	0.008216	0.011343	0.010809
65.28	0.007891	0.011299	0.010574
65.52	0.007767	0.011069	0.010713
65.76	0.007766	0.010896	0.010945
66	0.007813	0.010982	0.010687
66.24	0.00765	0.010992	0.010314
66.48	0.007719	0.010863	0.010724
66.72	0.007964	0.010351	0.010935
66.96	0.007957	0.011175	0.011063
67.2	0.007849	0.011196	0.011151
67.44	0.007961	0.011324	0.010975
67.68	0.007916	0.011308	0.010904
67.92	0.007805	0.010821	0.011161
68.16	0.008042	0.011306	0.011213
68.4	0.007566	0.011032	0.010827
68.64	0.007902	0.011303	0.011085
68.88	0.007841	0.010904	0.01101
69.12	0.007818	0.011057	0.011142
69.36	0.008096	0.011079	0.011401
69.6	0.007803	0.010888	0.011293
69.84	0.008122	0.011301	0.011361
70.08	0.007813	0.01117	0.011344
70.32	0.00778	0.010844	0.011074
70.56	0.007696	0.011182	0.011206
70.8	0.007908	0.011002	0.011016
71.04	0.007989	0.010983	0.011248
71.28	0.007892	0.011572	0.010907
71.52	0.007986	0.0115	0.011364
71.76	0.007976	0.011443	0.011084
72	0.008234	0.011329	0.011257
72.24	0.007925	0.011129	0.011631
72.48	0.00791	0.011201	0.011265
72.72	0.008078	0.011633	0.011568
72.96	0.007947	0.011441	0.011386
73.2	0.008035	0.011502	0.011514
73.44	0.00803	0.011272	0.011295
73.68	0.008272	0.011455	0.011103
73.92	0.007834	0.011438	0.011381
74.16	0.008039	0.011766	0.011687
74.4	0.008178	0.011658	0.011462
74.64	0.007833	0.011236	0.011619
74.88	0.008042	0.011492	0.011302
75.12	0.008132	0.011343	0.011638
75.36	0.008279	0.011352	0.01132
75.6	0.008176	0.011019	0.011265
75.84	0.008186	0.011308	0.011671
76.08	0.007866	0.011832	0.011505
76.32	0.008195	0.011087	0.011178
76.56	0.008104	0.011445	0.011675
76.8	0.008195	0.011324	0.011584
77.04	0.007971	0.011692	0.011714
77.28	0.008084	0.011628	0.011263
77.52	0.008006	0.011521	0.011325
77.76	0.008034	0.011708	0.011443
78	0.008237	0.011529	0.011667
78.24	0.008259	0.011625	0.011654
78.48	0.008286	0.011453	0.012033
78.72	0.008143	0.011596	0.011515
78.96	0.008207	0.011599	0.011726
79.2	0.008046	0.011702	0.01151
79.44	0.008291	0.011927	0.011437
79.68	0.008151	0.011682	0.011913
79.92	0.008137	0.011508	0.011596
80.16	0.008062	0.011683	0.011765
80.4	0.008401	0.011597	0.011464
80.64	0.007943	0.011113	0.011703
80.88	0.00811	0.011787	0.011771
81.12	0.008149	0.012145	0.01176
81.36	0.00801	0.011513	0.011713
81.6	0.00798	0.01137	0.011669
81.84	0.008247	0.011847	0.011953
82.08	0.008217	0.011819	0.011786
82.32	0.008247	0.01158	0.01199
82.56	0.008538	0.011775	0.012051
82.8	0.008165	0.011512	0.012105
83.04	0.008266	0.011861	0.011702
83.28	0.008286	0.011834	0.012132
83.52	0.008068	0.011779	0.011982
83.76	0.008361	0.011578	0.012163
84	0.008082	0.011781	0.01188
84.24	0.007912	0.0117	0.012054
84.48	0.007986	0.011907	0.012103
84.72	0.008212	0.011835	0.011959
84.96	0.008097	0.012198	0.011684
85.2	0.008063	0.011975	0.012031
85.44	0.008065	0.011146	0.011803
85.68	0.007973	0.012065	0.012101
85.92	0.008199	0.011277	0.012605
86.16	0.007993	0.011621	0.012306
86.4	0.008074	0.011719	0.012466
86.64	0.007898	0.012176	0.012383
86.88	0.008514	0.011725	0.012428
87.12	0.008131	0.011781	0.012303
87.36	0.008411	0.011921	0.012331
87.6	0.00826	0.011504	0.012275
87.84	0.008468	0.012183	0.012042
88.08	0.008025	0.011723	0.012173
88.32	0.008272	0.011848	0.012653
88.56	0.007972	0.011689	0.012186
88.8	0.00821	0.011533	0.012282
89.04	0.008212	0.011861	0.012309
89.28	0.008191	0.011623	0.012344
89.52	0.008225	0.011499	0.012168
89.76	0.008182	0.011653	0.012172
90	0.008181	0.011971	0.01234
90.24	0.008168	0.011769	0.012175
90.48	0.008093	0.011584	0.012564
90.72	0.008093	0.012192	0.012399
90.96	0.008104	0.01207	0.012013
91.2	0.008215	0.011507	0.012254
91.44	0.008069	0.011407	0.012339
91.68	0.008088	0.011987	0.012426
91.92	0.008239	0.011972	0.012231
92.16	0.008396	0.011962	0.012648
92.4	0.008409	0.011563	0.011981
92.64	0.008201	0.011699	0.012171
92.88	0.008066	0.011872	0.012328
93.12	0.007986	0.011567	0.012436
93.36	0.008102	0.011774	0.012371
93.6	0.008156	0.011785	0.012159
93.84	0.008347	0.011715	0.012239
94.08	0.008305	0.011742	0.012551
94.32	0.008156	0.012097	0.012199
94.56	0.008393	0.011452	0.012679
94.8	0.007891	0.011655	0.012504
95.04	0.008306	0.012013	0.012675
95.28	0.008209	0.011963	0.012395
95.52	0.008484	0.012183	0.012184
95.76	0.008205	0.012208	0.01245
96	0.008098	0.012113	0.012469
96.24	0.00834	0.012102	0.012372
96.48	0.008452	0.012297	0.012542
96.72	0.008191	0.011687	0.012255
96.96	0.008199	0.011685	0.012436
97.2	0.00821	0.011738	0.012229
97.44	0.008156	0.012249	0.012453
97.68	0.008217	0.012008	0.012429
97.92	0.008056	0.011929	0.012391
98.16	0.00816	0.012192	0.012526
98.4	0.008304	0.012199	0.012769
98.64	0.008386	0.011701	0.012652
98.88	0.008362	0.011984	0.012716
99.12	0.008459	0.011957	0.012284
99.36	0.008296	0.011853	0.012767
99.6	0.008327	0.012053	0.011958
99.84	0.008373	0.011927	0.012812
100.08	0.008244	0.011989	0.01235
100.32	0.008311	0.012252	0.012462
100.56	0.008193	0.011771	0.012378
100.8	0.008346	0.012034	0.012644
101.04	0.008234	0.012166	0.012905
101.28	0.008295	0.012101	0.012195
101.52	0.008286	0.012064	0.012804
101.76	0.008086	0.012072	0.013098
102	0.008327	0.012014	0.012535
102.24	0.008091	0.012432	0.012652
102.48	0.008108	0.011449	0.012973
102.72	0.008235	0.011919	0.012467
102.96	0.008305	0.011927	0.012731
103.2	0.008276	0.011835	0.012695
103.44	0.007956	0.012376	0.012414
103.68	0.008077	0.011834	0.012946
103.92	0.008066	0.012082	0.012667
104.16	0.008229	0.011939	0.012828
104.4	0.008242	0.011835	0.012719
104.64	0.008307	0.012126	0.012711
104.88	0.008242	0.011926	0.012713
105.12	0.007987	0.01207	0.012568
105.36	0.008413	0.011992	0.012496
105.6	0.008031	0.011786	0.01266
105.84	0.008059	0.011876	0.012737
106.08	0.008252	0.012007	0.012765
106.32	0.008114	0.011985	0.012706
106.56	0.008026	0.012022	0.012417
106.8	0.008158	0.012044	0.012657
107.04	0.008157	0.011559	0.01258
107.28	0.008234	0.012186	0.012642
107.52	0.008313	0.011948	0.012939
107.76	0.008327	0.011807	0.012612
108	0.008395	0.011979	0.012518
108.24	0.008156	0.011897	0.012887
108.48	0.008421	0.012007	0.012443
108.72	0.008101	0.012008	0.012547
108.96	0.008209	0.01202	0.013182
109.2	0.008004	0.012084	0.012631
109.44	0.008318	0.011821	0.013028
109.68	0.008356	0.011917	0.01247
109.92	0.008184	0.012345	0.012925
110.16	0.007883	0.011862	0.012509
110.4	0.008138	0.011895	0.012843
110.64	0.008195	0.011898	0.012649
110.88	0.008021	0.01184	0.012893
111.12	0.008013	0.012106	0.01288
111.36	0.007945	0.011982	0.013069
111.6	0.008236	0.011881	0.012628
111.84	0.008093	0.012392	0.012815
112.08	0.008283	0.011765	0.012774
112.32	0.00812	0.011904	0.012569
112.56	0.008185	0.011722	0.01286
112.8	0.008254	0.012301	0.013352
113.04	0.008244	0.012118	0.012749
113.28	0.007999	0.011899	0.0127
113.52	0.008167	0.011895	0.012747
113.76	0.007891	0.012316	0.012816
114	0.007989	0.012028	0.012844
114.24	0.008007	0.012163	0.012638
114.48	0.00803	0.011709	0.012773
114.72	0.008508	0.012385	0.013289
114.96	0.008136	0.012108	0.012972
115.2	0.008131	0.011592	0.012901
115.44	0.007907	0.012434	0.012926
115.68	0.007992	0.01159	0.013047
115.92	0.008009	0.011926	0.012477
116.16	0.008155	0.011601	0.013044
116.4	0.008306	0.012059	0.012691
116.64	0.008025	0.012079	0.012907
116.88	0.008133	0.012052	0.012296
117.12	0.008189	0.011705	0.012314
117.36	0.007812	0.011933	0.012889
117.6	0.007803	0.012213	0.012919
117.84	0.008276	0.011908	0.012795
118.08	0.008075	0.011391	0.012918
118.32	0.008032	0.012078	0.012756
118.56	0.007974	0.012043	0.013082
118.8	0.007796	0.012009	0.012937
119.04	0.007937	0.012365	0.012843
119.28	0.007902	0.011865	0.012765
119.52	0.007963	0.012242	0.012687
119.76	0.007983	0.011971	0.012801
120	0.008207	0.01204	0.012881
120.24	0.007884	0.012021	0.013362
120.48	0.008227	0.011836	0.012743
120.72	0.007914	0.012187	0.012836
120.96	0.008015	0.011865	0.012909
121.2	0.007934	0.011899	0.012652
121.44	0.008134	0.012088	0.013111
121.68	0.008053	0.011802	0.012727
121.92	0.008107	0.011898	0.012645
122.16	0.007976	0.012183	0.012908
122.4	0.007948	0.012394	0.012947
122.64	0.007891	0.011842	0.012914
122.88	0.007733	0.012103	0.01301
123.12	0.008014	0.012435	0.0133
123.36	0.008125	0.011993	0.012592
123.6	0.007756	0.011956	0.012749
123.84	0.007691	0.012341	0.012967
124.08	0.008026	0.011843	0.012636
124.32	0.007931	0.011787	0.013008
124.56	0.007721	0.012175	0.012942
124.8	0.007779	0.01192	0.013054
125.04	0.008063	0.01201	0.013109
125.28	0.007898	0.011442	0.013011
125.52	0.007868	0.011763	0.012846
125.76	0.008009	0.012152	0.01284
126	0.008007	0.011917	0.013072
126.24	0.008077	0.012298	0.013139
126.48	0.007779	0.0121	0.013185
126.72	0.007854	0.0123	0.013239
126.96	0.007999	0.012486	0.01324
127.2	0.007887	0.011916	0.012749
127.44	0.008005	0.012114	0.012595
127.68	0.007916	0.011846	0.013007
127.92	0.008239	0.011933	0.01277
128.16	0.00793	0.011727	0.012894
128.4	0.007813	0.011752	0.013016
128.64	0.007769	0.011854	0.012966
128.88	0.008273	0.012148	0.012959
129.12	0.008128	0.012227	0.013323
129.36	0.008116	0.011884	0.012919
129.6	0.007681	0.011913	0.013013
129.84	0.007991	0.011842	0.012943
130.08	0.007901	0.012302	0.013129
130.32	0.00779	0.012272	0.012704
130.56	0.007863	0.012204	0.012892
130.8	0.008116	0.012084	0.012949
131.04	0.007903	0.012204	0.013093
131.28	0.008083	0.012231	0.012819
131.52	0.007953	0.011837	0.012515
131.76	0.007801	0.011992	0.013176
132	0.008009	0.011957	0.012631
132.24	0.007853	0.012199	0.012992
132.48	0.007834	0.012089	0.012839
132.72	0.007827	0.012188	0.01309
132.96	0.007807	0.012385	0.012895
133.2	0.007762	0.012084	0.012675
133.44	0.00746	0.012292	0.013002
133.68	0.007669	0.011783	0.013196
133.92	0.007964	0.011516	0.013236
134.16	0.007571	0.012277	0.012879
134.4	0.007915	0.012009	0.013022
134.64	0.007779	0.011322	0.012873
134.88	0.007832	0.011871	0.012878
135.12	0.007978	0.012292	0.012879
135.36	0.007747	0.011724	0.012801
135.6	0.007796	0.011969	0.012783
135.84	0.007887	0.011658	0.012685
136.08	0.00758	0.011979	0.012946
136.32	0.007806	0.011981	0.012896
136.56	0.008121	0.011851	0.012729
136.8	0.007689	0.012249	0.012718
137.04	0.008117	0.012505	0.012736
137.28	0.007782	0.011994	0.013026
137.52	0.007778	0.011832	0.012487
137.76	0.007942	0.011963	0.013069
138	0.007745	0.011766	0.012726
138.24	0.007817	0.012294	0.013002
138.48	0.007554	0.012042	0.012873
138.72	0.007826	0.011832	0.012997
138.96	0.007892	0.011613	0.013038
139.2	0.007737	0.012073	0.012686
139.44	0.007641	0.012116	0.013142
139.68	0.007891	0.012123	0.012709
139.92	0.007661	0.012456	0.01281
140.16	0.007541	0.012127	0.013042
140.4	0.007995	0.012061	0.013107
140.64	0.007857	0.012276	0.01329
140.88	0.00794	0.012361	0.012839
141.12	0.00775	0.012141	0.013141
141.36	0.007625	0.011993	0.012875
141.6	0.007597	0.011512	0.013045
141.84	0.007733	0.011794	0.013374
142.08	0.007827	0.011611	0.013123
142.32	0.007712	0.011394	0.012904
142.56	0.007954	0.012129	0.012761
142.8	0.007728	0.011874	0.012983
143.04	0.007538	0.01207	0.013264
143.28	0.007877	0.011955	0.012832
143.52	0.00758	0.012476	0.013252
143.76	0.007612	0.012009	0.013166
144	0.00782	0.012136	0.012892
144.24	0.007681	0.011888	0.012658
144.48	0.007831	0.012251	0.013161
144.72	0.007768	0.012186	0.013152
144.96	0.007693	0.011878	0.013052
145.2	0.007624	0.011589	0.012961
145.44	0.008045	0.011607	0.013288
145.68	0.007334	0.011958	0.012549
145.92	0.007828	0.012194	0.012961
146.16	0.007517	0.012462	0.013497
146.4	0.007551	0.011857	0.013057
146.64	0.007645	0.011842	0.012847
146.88	0.007775	0.012162	0.012958
147.12	0.00783	0.012114	0.012987
147.36	0.007561	0.011983	0.013222
147.6	0.007635	0.011869	0.012842
147.84	0.007662	0.012118	0.01279
148.08	0.007444	0.012138	0.013435
148.32	0.00761	0.011925	0.012748
148.56	0.007633	0.011628	0.012871
148.8	0.007541	0.011725	0.013018
149.04	0.007448	0.01167	0.012615
149.28	0.007751	0.011763	0.012682
149.52	0.007615	0.011572	0.012986
149.76	0.007744	0.011754	0.012791
150	0.00778	0.01199	0.013229
150.24	0.007597	0.012517	0.013178
150.48	0.00754	0.011847	0.012897
150.72	-0.00095	0.003942	0.005618
150.96	0.042624	0.033716	0.051891
151.2	-0.04259	-0.03356	-0.03197
151.44	0.137307	0.127573	0.128603
151.68	0.02072	0.023855	0.02486
151.92	0.00765	0.012002	0.013021
152.16	0.007443	0.012007	0.013061
152.4	0.007325	0.011986	0.012419
152.64	0.007672	0.011879	0.012895
152.88	0.007502	0.012074	0.013065
153.12	0.007445	0.011861	0.013066
153.36	0.007735	0.0117	0.012904
153.6	0.007763	0.012024	0.012922
153.84	0.007405	0.012203	0.01301
154.08	0.007328	0.011955	0.013232
154.32	0.007447	0.012032	0.013034
154.56	0.007446	0.012183	0.01362
154.8	0.007376	0.011866	0.013442
155.04	0.007669	0.011938	0.013238
155.28	0.007584	0.01212	0.013204
155.52	0.007571	0.011755	0.01315
155.76	0.007383	0.011881	0.013093
156	0.007749	0.011974	0.013198
156.24	0.007624	0.011712	0.013294
156.48	0.007386	0.011786	0.013556
156.72	0.00732	0.011862	0.012806
156.96	0.007448	0.011887	0.013056
157.2	0.007253	0.011947	0.013413
157.44	0.007168	0.011754	0.012646
157.68	0.00745	0.012071	0.013294
157.92	0.00751	0.012269	0.01297
158.16	0.00768	0.012311	0.013026
158.4	0.007379	0.011924	0.01312
158.64	0.007732	0.011762	0.013061
158.88	0.007463	0.012382	0.013128
159.12	0.007472	0.012128	0.013024
159.36	0.007169	0.011761	0.013646
159.6	0.007112	0.011935	0.012951
159.84	0.0073	0.011945	0.01293
160.08	0.007411	0.011766	0.012926
160.32	0.007449	0.012027	0.013123
160.56	0.007714	0.011883	0.013139
160.8	0.007279	0.011941	0.012934
161.04	0.007186	0.01213	0.012778
161.28	0.007415	0.012186	0.013355
161.52	0.007242	0.01199	0.013407
161.76	0.007486	0.01217	0.013071
162	0.007166	0.011858	0.013157
162.24	0.007196	0.012013	0.013177
162.48	0.007366	0.01181	0.013336
162.72	0.00721	0.011837	0.013122
162.96	0.00709	0.011872	0.013514
163.2	0.007176	0.01185	0.013138
163.44	0.007474	0.011851	0.013521
163.68	0.007242	0.011991	0.013267
163.92	0.00744	0.01172	0.013193
164.16	0.007499	0.011835	0.013064
164.4	0.007286	0.012054	0.013079
164.64	0.007488	0.011846	0.013122
164.88	0.007424	0.011416	0.013222
165.12	0.007478	0.011762	0.013049
165.36	0.007346	0.012025	0.012871
165.6	0.007276	0.01194	0.013523
165.84	0.007427	0.011853	0.013297
166.08	0.007319	0.011998	0.013115
166.32	0.007385	0.01164	0.013234
166.56	0.00706	0.011851	0.012801
166.8	0.007168	0.012055	0.013266
167.04	0.007294	0.011941	0.012982
167.28	0.007051	0.011907	0.012961
167.52	0.007425	0.011907	0.013231
167.76	0.007369	0.01179	0.012896
168	0.007268	0.011839	0.013073
168.24	0.007478	0.011599	0.013186
168.48	0.007451	0.01204	0.013014
168.72	0.007163	0.012008	0.01332
168.96	0.007242	0.012142	0.013138
169.2	0.006893	0.011878	0.012932
169.44	0.007281	0.011826	0.012993
169.68	0.00715	0.012341	0.012984
169.92	0.007243	0.01215	0.013367
170.16	0.007002	0.011715	0.012897
170.4	0.007361	0.012126	0.013273
170.64	0.007369	0.011803	0.012694
170.88	0.007087	0.011425	0.013043
171.12	0.007009	0.011803	0.013197
171.36	0.00683	0.011746	0.013254
171.6	0.006726	0.011613	0.012687
171.84	0.007149	0.011948	0.012901
172.08	0.007092	0.012095	0.013076
172.32	0.006788	0.011849	0.013294
172.56	0.007337	0.011939	0.012926
172.8	0.007052	0.011909	0.013344
173.04	0.007079	0.011564	0.013122
173.28	0.00699	0.012156	0.013507
173.52	0.007	0.011766	0.013195
173.76	0.007221	0.011665	0.013432
174	0.006894	0.011971	0.013023
174.24	0.007373	0.012269	0.013236
174.48	0.007043	0.012018	0.013327
174.72	0.007203	0.011815	0.012963
174.96	0.007048	0.012234	0.013019
175.2	0.006827	0.011712	0.013196
175.44	0.006935	0.011573	0.013185
175.68	0.006735	0.01201	0.012859
175.92	0.007009	0.011925	0.013031
176.16	0.007048	0.011959	0.013147
176.4	0.006834	0.011957	0.01297
176.64	0.007273	0.011848	0.013038
176.88	0.006776	0.01136	0.013248
177.12	0.0068	0.011853	0.013373
177.36	0.006763	0.011681	0.01319
177.6	0.006841	0.011625	0.01299
177.84	0.007367	0.011734	0.012963
178.08	0.006893	0.012334	0.013319
178.32	0.006524	0.01176	0.013155
178.56	0.007143	0.011836	0.013598
178.8	0.006772	0.011737	0.012819
179.04	0.007063	0.011981	0.013224
179.28	0.006997	0.011595	0.01339
179.52	0.006709	0.012126	0.012783
179.76	0.006916	0.01197	0.013041
180	0.006929	0.011831	0.012984
180.24	0.006754	0.011876	0.012964
180.48	0.006802	0.011948	0.01297
180.72	0.006854	0.012007	0.012812
180.96	0.007004	0.011761	0.013026
181.2	0.006925	0.012021	0.012761
181.44	0.007174	0.011729	0.012805
181.68	0.006883	0.011463	0.013109
181.92	0.006839	0.011691	0.013092
182.16	0.006804	0.011694	0.01278
182.4	0.006716	0.011826	0.012589
182.64	0.006758	0.011946	0.013231
182.88	0.006576	0.012183	0.013023
183.12	0.007065	0.011696	0.0132
183.36	0.006645	0.012082	0.01294
183.6	0.006717	0.011451	0.013226
183.84	0.006934	0.012077	0.012855
184.08	0.006746	0.011827	0.012698
184.32	0.006733	0.012316	0.0131
184.56	0.006854	0.01194	0.012912
184.8	0.006798	0.011946	0.01315
185.04	0.007034	0.012039	0.012888
185.28	0.006899	0.011577	0.012877
185.52	0.006664	0.012055	0.012807
185.76	0.006567	0.011627	0.013251
186	0.006676	0.012161	0.012918
186.24	0.006861	0.011419	0.01294
186.48	0.006548	0.011673	0.012913
186.72	0.006955	0.011816	0.012932
186.96	0.006882	0.011743	0.013189
187.2	0.006748	0.011701	0.013328
187.44	0.006661	0.011549	0.012989
187.68	0.006659	0.011778	0.01307
187.92	0.006652	0.011856	0.013182
188.16	0.006804	0.011779	0.012728
188.4	0.006809	0.012116	0.013111
188.64	0.006888	0.012056	0.013136
188.88	0.006381	0.011633	0.012944
189.12	0.006516	0.011474	0.013094
189.36	0.0068	0.011705	0.013121
189.6	0.006649	0.011708	0.012566
189.84	0.006535	0.011557	0.012628
190.08	0.006584	0.011931	0.012889
190.32	0.006615	0.011721	0.013114
190.56	0.006579	0.011977	0.013079
190.8	0.006552	0.011852	0.01295
191.04	0.006733	0.011825	0.013069
191.28	0.006718	0.011784	0.013232
191.52	0.006356	0.011966	0.012853
191.76	0.006821	0.011324	0.012571
192	0.006788	0.011652	0.013284
192.24	0.006611	0.011852	0.013263
192.48	0.00682	0.01129	0.013096
192.72	0.006279	0.011818	0.012904
192.96	0.006337	0.011719	0.012691
193.2	0.006501	0.012007	0.012963
193.44	0.006405	0.012039	0.012794
193.68	0.006503	0.011577	0.012934
193.92	0.006654	0.011213	0.012899
194.16	0.006407	0.011977	0.013023
194.4	0.006579	0.011701	0.012771
194.64	0.006409	0.011643	0.012757
194.88	0.006327	0.012106	0.01286
195.12	0.006423	0.011958	0.012792
195.36	0.00645	0.011084	0.01319
195.6	0.00674	0.011784	0.013623
195.84	0.006666	0.011142	0.01297
196.08	0.006676	0.011405	0.01311
196.32	0.006466	0.011685	0.012741
196.56	0.006784	0.011501	0.013287
196.8	0.006318	0.011893	0.012858
197.04	0.006416	0.011835	0.013345
197.28	0.006439	0.011997	0.012851
197.52	0.006491	0.011683	0.012834
197.76	0.006362	0.012039	0.012598
198	0.006307	0.011795	0.013137
198.24	0.006619	0.011512	0.012873
198.48	0.00625	0.011678	0.012783
198.72	0.006494	0.011659	0.013035
198.96	0.006315	0.012039	0.012711
199.2	0.00641	0.011633	0.012807
199.44	0.006174	0.011534	0.013054
199.68	0.00626	0.011446	0.013215
199.92	0.00617	0.011862	0.013022
200.16	0.006376	0.011703	0.012879
200.4	0.00635	0.011588	0.012932
200.64	0.006405	0.011589	0.013019
200.88	0.006405	0.011421	0.013102
201.12	0.006545	0.011434	0.012921
201.36	0.006347	0.011783	0.012517
201.6	0.00634	0.012146	0.012611
201.84	0.006136	0.01163	0.013154
202.08	0.006651	0.011954	0.013026
202.32	0.006203	0.011408	0.013095
202.56	0.00667	0.011204	0.012938
202.8	0.006714	0.012087	0.013068
203.04	0.006143	0.011288	0.012987
203.28	0.006365	0.011639	0.012811
203.52	0.006375	0.011881	0.012855
203.76	0.006101	0.011528	0.012848
204	0.006226	0.011659	0.012489
204.24	0.00608	0.011541	0.013059
204.48	0.005795	0.011907	0.012499
204.72	0.00621	0.011752	0.012897
204.96	0.006278	0.011985	0.012743
205.2	0.006197	0.011672	0.013166
205.44	0.005895	0.011512	0.012928
205.68	0.006254	0.011762	0.012968
205.92	0.006366	0.011515	0.012757
206.16	0.006279	0.011696	0.012935
206.4	0.006235	0.011215	0.012757
206.64	0.00625	0.011621	0.012665
206.88	0.006297	0.011484	0.013183
207.12	0.006041	0.011659	0.012919
207.36	0.006044	0.011381	0.013158
207.6	0.006272	0.011695	0.012546
207.84	0.006385	0.011798	0.013189
208.08	0.006391	0.011416	0.013377
208.32	0.006444	0.011255	0.012746
208.56	0.005999	0.011568	0.012745
208.8	0.006467	0.011855	0.012871
209.04	0.00636	0.011505	0.012687
209.28	0.006067	0.011972	0.012663
209.52	0.006218	0.011589	0.012697
209.76	0.006011	0.011523	0.01281
210	0.006116	0.011779	0.012862
210.24	0.006069	0.011442	0.012911
210.48	0.005992	0.011295	0.012354
210.72	0.006041	0.01182	0.012871
210.96	0.006329	0.011749	0.013027
211.2	0.006014	0.011517	0.012778
211.44	0.006022	0.011661	0.012419
211.68	0.006151	0.011784	0.012747
211.92	0.005929	0.011438	0.012721
212.16	0.006233	0.012111	0.012919
212.4	0.006095	0.011545	0.01269
212.64	0.006021	0.011416	0.012788
212.88	0.005934	0.011486	0.013039
213.12	0.006174	0.011265	0.01316
213.36	0.006099	0.011258	0.012708
213.6	0.006117	0.011744	0.012678
213.84	0.006107	0.011525	0.012546
214.08	0.00597	0.01163	0.012882
214.32	0.006325	0.01163	0.013244
214.56	0.005949	0.011672	0.012772
214.8	0.0062	0.011325	0.012688
215.04	0.006164	0.011588	0.012713
215.28	0.00607	0.011797	0.01291
215.52	0.005892	0.011706	0.01271
215.76	0.00593	0.011533	0.012678
216	0.006052	0.01147	0.01251
216.24	0.006236	0.011252	0.01267
216.48	0.006185	0.011362	0.012985
216.72	0.006069	0.011562	0.012975
216.96	0.006055	0.01157	0.012169
217.2	0.006009	0.011854	0.012711
217.44	0.006172	0.011616	0.012686
217.68	0.00625	0.011278	0.012876
217.92	0.006285	0.011852	0.012886
218.16	0.005787	0.01205	0.012719
218.4	0.006013	0.011805	0.012454
218.64	0.006192	0.011225	0.012416
218.88	0.005853	0.011823	0.012857
219.12	0.005919	0.011638	0.012803
219.36	0.006034	0.012173	0.013067
219.6	0.00622	0.011631	0.013003
219.84	0.006027	0.011086	0.01256
220.08	0.006014	0.011929	0.01256
220.32	0.00603	0.011505	0.012624
220.56	0.005978	0.011678	0.012466
220.8	0.005838	0.01163	0.01297
221.04	0.006029	0.01168	0.012669
221.28	0.005739	0.011379	0.012326
221.52	0.005639	0.011721	0.012808
221.76	0.006118	0.011329	0.01256
222	0.005651	0.01127	0.012648
222.24	0.005988	0.011695	0.012841
222.48	0.005708	0.011662	0.01297
222.72	0.00572	0.011738	0.012726
222.96	0.00605	0.011361	0.012432
223.2	0.005811	0.011076	0.013054
223.44	0.005953	0.011462	0.012858
223.68	0.005882	0.011692	0.01252
223.92	0.006126	0.011621	0.012638
224.16	0.005694	0.011809	0.012569
224.4	0.005946	0.011272	0.01287
224.64	0.00575	0.01174	0.012596
224.88	0.005615	0.011036	0.012712
225.12	0.005599	0.011874	0.012967
225.36	0.00614	0.011923	0.012627
225.6	0.005668	0.011553	0.012677
225.84	0.005816	0.011797	0.012635
226.08	0.005953	0.011335	0.012812
226.32	0.005724	0.011534	0.012297
226.56	0.005917	0.011315	0.012524
226.8	0.005805	0.011646	0.012288
227.04	0.005776	0.011598	0.013032
227.28	0.005806	0.011355	0.012632
227.52	0.0056	0.011543	0.012139
227.76	0.005788	0.011397	0.012592
228	0.005732	0.011578	0.012436
228.24	0.005614	0.011334	0.012311
228.48	0.005817	0.011638	0.013473
228.72	0.005759	0.011582	0.01267
228.96	0.005723	0.011672	0.012766
229.2	0.005768	0.011385	0.012909
229.44	0.005713	0.011989	0.013067
229.68	0.005705	0.011282	0.012613
229.92	0.005723	0.01135	0.012712
230.16	0.005708	0.01175	0.012695
230.4	0.005607	0.011516	0.012595
230.64	0.005688	0.011379	0.012943
230.88	0.005744	0.011395	0.01253
231.12	0.005728	0.0115	0.012662
231.36	0.005631	0.011462	0.01275
231.6	0.00531	0.011695	0.012594
231.84	0.005444	0.011813	0.012785
232.08	0.005332	0.011232	0.013049
232.32	0.005511	0.011374	0.012603
232.56	0.005708	0.011728	0.012772
232.8	0.005725	0.01122	0.013064
233.04	0.00588	0.011519	0.012423
233.28	0.005879	0.011799	0.012336
233.52	0.005773	0.011296	0.012788
233.76	0.005703	0.011305	0.012623
234	0.005874	0.011097	0.012527
234.24	0.005476	0.011427	0.012624
234.48	0.005739	0.011127	0.012538
234.72	0.00595	0.011798	0.012658
234.96	0.005524	0.011672	0.012521
235.2	0.005377	0.011357	0.012524
235.44	0.005519	0.0111	0.012716
235.68	0.005621	0.011525	0.012321
235.92	0.005678	0.011311	0.012307
236.16	0.005617	0.011425	0.012442
236.4	0.005911	0.011284	0.012734
236.64	0.005515	0.011547	0.012706
236.88	0.005283	0.011567	0.012773
237.12	0.005375	0.011682	0.012967
237.36	0.005514	0.011365	0.012907
237.6	0.00567	0.011298	0.012485
237.84	0.005629	0.01099	0.012638
238.08	0.005434	0.011637	0.012755
238.32	0.00524	0.011298	0.012666
238.56	0.005609	0.011629	0.012532
238.8	0.005316	0.0115	0.012537
239.04	0.005487	0.011091	0.012633
239.28	0.005637	0.011317	0.012277
239.52	0.005566	0.011512	0.012476
239.76	0.005361	0.011656	0.012747
