# Supplementary material for: Complementary biosensors reveal different G-protein signaling modes triggered by GPCRs and non-receptor activators
Source: eLife. 2021 Mar 31;10:e65620. doi: 10.7554/eLife.65620 (PMC8034979; doi:10.7554/eLife.65620)
Supplement: Figure 2—source data 1. [file elife-65620-fig2-data1.xlsx]

## Sheet: GIV
Time	Exp1	Exp2	Exp3	Exp4
0	-3e-05	-5e-05	6e-05	5e-05
0.24	-5e-05	-0.00039	0	9e-05
0.48	5e-05	-0.00022	0.00015	5e-05
0.72	0.00015	0.00019	-0.00016	0.00013
0.96	-4e-05	0.00024	0.0001	8e-05
1.2	0.00019	-9e-05	-1e-05	-0.00017
1.44	-0.00024	0.00017	-5e-05	0.00012
1.68	0	5e-05	0.00012	-8e-05
1.92	0.00035	0.00026	0.00016	0.00041
2.16	0	-0.00011	-0.00023	6e-05
2.4	-6e-05	5e-05	0.00042	-9e-05
2.64	-0.00016	0.0001	3e-05	0.00011
2.88	-0.00033	-0.00022	-0.00012	-1e-05
3.12	-4e-05	3e-05	0.00031	0.00022
3.36	-5e-05	0.00011	-1e-05	1e-05
3.6	0.00014	-0.0001	0.00027	1e-05
3.84	0.00019	-8e-05	-4e-05	0.00022
4.08	-2e-05	-4e-05	-4e-05	0
4.32	0.00011	0.00012	-8e-05	0.0001
4.56	0.0001	-0.00017	-2e-05	3e-05
4.8	-0.00014	0.00018	0.00012	0.00019
5.04	-0.0001	6e-05	-0.00031	-4e-05
5.28	0.00011	0.00013	-6e-05	-1e-05
5.52	0.00019	6e-05	9e-05	-0.00013
5.76	-0.00018	8e-05	-6e-05	3e-05
6	0.00031	-6e-05	-5e-05	0.00012
6.24	8e-05	-3e-05	-2e-05	0.00014
6.48	0.00029	0.0002	-0.00013	-1e-05
6.72	-4e-05	-6e-05	2e-05	-8e-05
6.96	0.00024	1e-05	3e-05	9e-05
7.2	-0.00022	0.00014	4e-05	0.00012
7.44	9e-05	-0.00013	0.00014	-0.00016
7.68	1e-05	0.00024	1e-05	0.00014
7.92	9e-05	-0.00012	0	-3e-05
8.16	-0.00011	-0.00014	1e-05	-0.00014
8.4	-0.00013	-0.00012	0	0.00024
8.64	0.00022	-0.00011	0.00013	8e-05
8.88	-0.00015	-0.0001	0	0.00023
9.12	0.0002	3e-05	0.00026	-6e-05
9.36	0.00017	5e-05	0.00022	-0.00014
9.6	0.00035	-8e-05	4e-05	0.00014
9.84	-1e-05	0.00015	7e-05	-0.00017
10.08	-0.00022	0.00016	0	-0.00016
10.32	5e-05	0.00011	0.00011	-0.00023
10.56	-0.00019	0.00013	-0.00023	0.0003
10.8	-0.00045	6e-05	7e-05	9e-05
11.04	0	5e-05	1e-05	8e-05
11.28	0.00018	5e-05	-0.00012	-0.00013
11.52	6e-05	0.00031	-0.00017	-9e-05
11.76	-0.0001	-1e-05	4e-05	0.00017
12	-2e-05	-0.00016	-0.00031	-6e-05
12.24	-9e-05	8e-05	0.00024	-0.00015
12.48	-6e-05	0.00029	-0.00034	-0.00029
12.72	-0.0001	0.00016	0.00019	0.00021
12.96	-9e-05	-0.00021	8e-05	0.00011
13.2	-6e-05	0.00012	0.00022	-0.00011
13.44	-3e-05	0.00011	8e-05	5e-05
13.68	-8e-05	-1e-05	-0.0001	-0.00018
13.92	-0.0001	5e-05	-6e-05	0
14.16	0	-0.0001	4e-05	-1e-05
14.4	-0.00043	7e-05	0.00013	-8e-05
14.64	-0.00011	0.00013	-4e-05	-0.00018
14.88	-9e-05	0.00022	4e-05	-0.00014
15.12	0.00015	-0.00018	0.00011	-0.00011
15.36	0.0001	-0.00021	-5e-05	-7e-05
15.6	3e-05	-1e-05	-1e-05	2e-05
15.84	0.0002	1e-05	1e-05	7e-05
16.08	-0.00017	5e-05	6e-05	-0.00014
16.32	0.0002	-0.00031	-0.00012	0.00015
16.56	-0.00021	-6e-05	-1e-05	8e-05
16.8	-0.0001	6e-05	-1e-05	-0.00019
17.04	-7e-05	0.00014	6e-05	0.00027
17.28	-0.00014	2e-05	0.00024	1e-05
17.52	0.00025	-0.0001	2e-05	0
17.76	-0.00022	0.00015	-0.00019	-0.00013
18	0.00031	4e-05	0.00012	-0.00034
18.24	-2e-05	0.0001	-4e-05	3e-05
18.48	0.0001	-6e-05	-8e-05	-6e-05
18.72	7e-05	0.00018	-0.00011	0.00015
18.96	-0.00013	-0.00038	8e-05	1e-05
19.2	-0.00019	-0.00013	-3e-05	0
19.44	0.00025	-9e-05	-8e-05	0.00013
19.68	-0.00015	-0.0001	-4e-05	-0.00024
19.92	-0.00023	0.0003	0.00016	-0.00023
20.16	-0.00022	-0.00016	-0.00014	-7e-05
20.4	0.00014	-0.00028	7e-05	-3e-05
20.64	0.00012	-2e-05	1e-05	0.00036
20.88	-3e-05	-3e-05	-0.00011	0.00027
21.12	0.00023	-0.00023	-0.00012	-0.00011
21.36	-6e-05	9e-05	9e-05	2e-05
21.6	-0.00015	0.00015	-0.0001	8e-05
21.84	-0.00019	9e-05	-5e-05	8e-05
22.08	0.00019	0	-0.00012	-0.0001
22.32	-0.0001	-0.00018	-6e-05	-0.0001
22.56	8e-05	-6e-05	0.0001	7e-05
22.8	0.00019	-2e-05	-0.00019	8e-05
23.04	-0.00011	0.0001	0.00013	1e-05
23.28	-7e-05	3e-05	0.00015	9e-05
23.52	3e-05	-0.00013	1e-05	-0.00022
23.76	-3e-05	-1e-05	-0.00025	-0.00026
24	0.0001	-9e-05	0.00011	-0.0001
24.24	-0.00016	4e-05	0.00014	-6e-05
24.48	0.00022	-0.0003	7e-05	-0.00013
24.72	-2e-05	-0.00016	-5e-05	-0.00018
24.96	0.00012	-2e-05	0.00012	-0.00018
25.2	-9e-05	3e-05	-0.00024	-2e-05
25.44	-0.00014	4e-05	-0.00023	0.00013
25.68	0.00011	0	-0.0001	8e-05
25.92	3e-05	-0.0001	0	-0.00019
26.16	-0.00016	9e-05	-0.00011	-3e-05
26.4	-1e-05	-0.00013	7e-05	9e-05
26.64	-0.00032	1e-05	-1e-05	7e-05
26.88	0.00015	-0.00011	-0.00024	0.00012
27.12	6e-05	-0.00038	0	1e-05
27.36	0.00015	0.00031	0.0001	0.00013
27.6	0.00018	0.00012	-3e-05	-0.00025
27.84	3e-05	0.00016	-7e-05	-5e-05
28.08	7e-05	-0.00023	-4e-05	-9e-05
28.32	-7e-05	1e-05	7e-05	-0.00016
28.56	4e-05	-3e-05	-9e-05	6e-05
28.8	4e-05	0.0001	-0.00026	5e-05
29.04	0.00023	-0.00016	3e-05	2e-05
29.28	-0.00029	0.00017	6e-05	1e-05
29.52	0.00012	-0.00011	-2e-05	-0.00017
29.76	-0.0002	2e-05	0.00023	8e-05
30	8e-05	1e-05	1e-05	0.00023
30.24	0.00028	4e-05	0.00013	0.0003
30.48	0.00027	0.00019	0.00031	0.00049
30.72	-0.01002	-0.01024	-0.00965	-0.00988
30.96	-0.05689	-0.06059	-0.05777	-0.05844
31.2	0.02107	0.02274	0.01919	0.0208
31.44	-0.0194	-0.0201	-0.01929	-0.0188
31.68	0.00057	0.00112	0.00063	0.00113
31.92	0.0007	0.00073	0.0005	0.00149
32.16	0.00072	0.00121	0.00082	0.00132
32.4	0.00101	0.00127	0.00084	0.00168
32.64	0.00136	0.00155	0.00107	0.00188
32.88	0.00115	0.00164	0.00095	0.00208
33.12	0.00126	0.00182	0.0013	0.00207
33.36	0.00149	0.00213	0.00141	0.0022
33.6	0.00178	0.00212	0.00158	0.00232
33.84	0.00204	0.00262	0.00145	0.00288
34.08	0.00206	0.0027	0.00189	0.00265
34.32	0.00204	0.00277	0.00171	0.0029
34.56	0.00258	0.00305	0.00183	0.00278
34.8	0.00258	0.00329	0.00188	0.00336
35.04	0.0025	0.00303	0.00202	0.00338
35.28	0.00279	0.00354	0.00236	0.00337
35.52	0.00262	0.00374	0.00226	0.00353
35.76	0.00321	0.00383	0.0025	0.00365
36	0.00297	0.00408	0.00269	0.00377
36.24	0.0031	0.00397	0.00265	0.00421
36.48	0.00346	0.00409	0.00273	0.00405
36.72	0.00362	0.00454	0.00302	0.00427
36.96	0.00366	0.00442	0.00302	0.00406
37.2	0.00383	0.00469	0.00308	0.0044
37.44	0.00388	0.00492	0.00324	0.00425
37.68	0.00409	0.00469	0.0031	0.00467
37.92	0.00397	0.0048	0.00328	0.00464
38.16	0.00441	0.00499	0.00341	0.00482
38.4	0.00404	0.00553	0.00346	0.00478
38.64	0.00414	0.00519	0.00365	0.00464
38.88	0.00438	0.00545	0.00367	0.00478
39.12	0.00442	0.0057	0.00359	0.00478
39.36	0.0049	0.0057	0.00353	0.00506
39.6	0.00454	0.00584	0.00383	0.00508
39.84	0.00461	0.00591	0.00378	0.00509
40.08	0.00494	0.00596	0.00407	0.00549
40.32	0.00496	0.00604	0.00404	0.00529
40.56	0.00508	0.00601	0.00404	0.0057
40.8	0.00538	0.00613	0.00417	0.00575
41.04	0.00529	0.00648	0.00425	0.00563
41.28	0.00525	0.00649	0.00431	0.0057
41.52	0.00536	0.00655	0.00437	0.00578
41.76	0.0059	0.0067	0.00452	0.00572
42	0.00597	0.00666	0.00442	0.00586
42.24	0.00581	0.00681	0.00449	0.00594
42.48	0.00562	0.00706	0.00464	0.00619
42.72	0.00576	0.00672	0.00459	0.00618
42.96	0.00602	0.00702	0.00467	0.00615
43.2	0.0061	0.00711	0.0045	0.00624
43.44	0.00612	0.00693	0.00479	0.00629
43.68	0.00585	0.00697	0.00481	0.00627
43.92	0.00619	0.00734	0.00494	0.00623
44.16	0.00612	0.00726	0.00475	0.00652
44.4	0.00657	0.00745	0.00501	0.00646
44.64	0.00639	0.00722	0.00498	0.00653
44.88	0.00646	0.00739	0.00502	0.00623
45.12	0.00668	0.00772	0.00505	0.00673
45.36	0.00642	0.00745	0.0049	0.00659
45.6	0.00659	0.00738	0.00489	0.00666
45.84	0.0072	0.00761	0.005	0.00657
46.08	0.00675	0.00755	0.00514	0.00659
46.32	0.00666	0.00775	0.00534	0.00678
46.56	0.00641	0.00783	0.00515	0.00697
46.8	0.00683	0.0078	0.00549	0.00663
47.04	0.00673	0.00784	0.00533	0.00705
47.28	0.00683	0.00794	0.00548	0.00679
47.52	0.00726	0.00803	0.00539	0.00704
47.76	0.00746	0.00783	0.00559	0.00706
48	0.00737	0.0077	0.00553	0.007
48.24	0.00706	0.00802	0.00555	0.00686
48.48	0.00707	0.00813	0.00573	0.00715
48.72	0.00728	0.00831	0.00577	0.00671
48.96	0.00706	0.00807	0.00564	0.0071
49.2	0.00722	0.00789	0.00581	0.00696
49.44	0.00724	0.00825	0.00567	0.00703
49.68	0.00705	0.0083	0.00563	0.00716
49.92	0.00751	0.0084	0.00583	0.00705
50.16	0.00726	0.00829	0.00572	0.00709
50.4	0.00747	0.00857	0.00564	0.00732
50.64	0.00741	0.00843	0.00576	0.00746
50.88	0.00737	0.00837	0.00561	0.00735
51.12	0.00777	0.00823	0.00595	0.00761
51.36	0.00763	0.00846	0.00566	0.00744
51.6	0.00775	0.00828	0.00593	0.00737
51.84	0.0078	0.0084	0.00597	0.00739
52.08	0.00785	0.0087	0.00607	0.00762
52.32	0.00782	0.00885	0.00591	0.00735
52.56	0.00794	0.00861	0.00648	0.00732
52.8	0.00797	0.00872	0.00604	0.00777
53.04	0.00793	0.0087	0.00605	0.00766
53.28	0.00784	0.0086	0.00613	0.00743
53.52	0.00829	0.00859	0.0063	0.00774
53.76	0.00785	0.00908	0.00632	0.00748
54	0.00803	0.00872	0.00625	0.00766
54.24	0.00771	0.00886	0.0061	0.00743
54.48	0.00784	0.00911	0.00595	0.00756
54.72	0.00821	0.00888	0.00591	0.0077
54.96	0.00825	0.00895	0.00619	0.00756
55.2	0.0075	0.00888	0.00647	0.00755
55.44	0.00826	0.00904	0.00625	0.00793
55.68	0.00849	0.00891	0.0063	0.00778
55.92	0.00801	0.00882	0.0063	0.00771
56.16	0.00828	0.00935	0.00633	0.00793
56.4	0.00816	0.00904	0.00612	0.00779
56.64	0.00836	0.00912	0.00656	0.00757
56.88	0.00846	0.00896	0.00636	0.00787
57.12	0.00847	0.00931	0.00638	0.00767
57.36	0.00826	0.00915	0.00661	0.00794
57.6	0.00859	0.00915	0.00664	0.00802
57.84	0.00856	0.00928	0.0064	0.00777
58.08	0.00839	0.00933	0.00664	0.00778
58.32	0.00851	0.00916	0.00656	0.00794
58.56	0.00842	0.00893	0.00629	0.00786
58.8	0.00871	0.00934	0.00656	0.00777
59.04	0.00866	0.00914	0.00654	0.00775
59.28	0.00861	0.00935	0.00676	0.0081
59.52	0.00886	0.00941	0.00663	0.00797
59.76	0.00872	0.00922	0.00665	0.00807
60	0.0087	0.0093	0.00664	0.00801
60.24	0.00827	0.00932	0.00645	0.00812
60.48	0.00881	0.00923	0.00685	0.00787
60.72	0.00897	0.00945	0.00675	0.00798
60.96	0.00838	0.00942	0.00684	0.00795
61.2	0.00922	0.00952	0.00656	0.00818
61.44	0.00893	0.0093	0.00662	0.00808
61.68	0.00883	0.00961	0.00659	0.00819
61.92	0.0089	0.00944	0.00681	0.00815
62.16	0.00865	0.00951	0.00643	0.00828
62.4	0.00894	0.00951	0.00683	0.00786
62.64	0.00905	0.00955	0.00679	0.00847
62.88	0.00895	0.00976	0.00671	0.00825
63.12	0.00861	0.00983	0.00705	0.00809
63.36	0.00881	0.0097	0.00679	0.00817
63.6	0.00894	0.00977	0.00685	0.00843
63.84	0.00878	0.00984	0.00671	0.00842
64.08	0.00905	0.00986	0.00696	0.00826
64.32	0.00899	0.00979	0.00674	0.00832
64.56	0.00895	0.00992	0.00679	0.00828
64.8	0.00912	0.00994	0.00691	0.00843
65.04	0.00895	0.00971	0.00674	0.00847
65.28	0.00875	0.00976	0.00674	0.0083
65.52	0.00889	0.00966	0.00677	0.00838
65.76	0.00892	0.00969	0.00696	0.00844
66	0.00919	0.00975	0.00686	0.00859
66.24	0.00906	0.0099	0.00712	0.00839
66.48	0.00915	0.00997	0.00679	0.00873
66.72	0.00918	0.00979	0.0069	0.00858
66.96	0.00919	0.01015	0.00698	0.0084
67.2	0.00921	0.00988	0.00704	0.00841
67.44	0.00923	0.00989	0.00678	0.00855
67.68	0.00943	0.00973	0.00698	0.0083
67.92	0.00912	0.00986	0.00702	0.00822
68.16	0.00907	0.01022	0.00684	0.00855
68.4	0.00931	0.00983	0.00663	0.00852
68.64	0.00926	0.00977	0.00697	0.0084
68.88	0.00929	0.00985	0.00672	0.00842
69.12	0.00924	0.00983	0.00689	0.00844
69.36	0.00947	0.0099	0.00725	0.00842
69.6	0.00913	0.00988	0.00706	0.00855
69.84	0.00904	0.00992	0.00715	0.00848
70.08	0.00939	0.01002	0.00726	0.0085
70.32	0.00935	0.01003	0.00715	0.00864
70.56	0.00957	0.01005	0.00692	0.00866
70.8	0.00931	0.00966	0.00711	0.00836
71.04	0.00921	0.01028	0.00701	0.00878
71.28	0.00935	0.00988	0.00697	0.00856
71.52	0.00938	0.01016	0.00718	0.00864
71.76	0.00955	0.00984	0.00727	0.0086
72	0.00941	0.0101	0.00714	0.00881
72.24	0.00955	0.01007	0.00694	0.00874
72.48	0.00944	0.00993	0.00737	0.00872
72.72	0.00957	0.01017	0.00743	0.00863
72.96	0.00956	0.01009	0.00699	0.00856
73.2	0.00951	0.01013	0.00726	0.00854
73.44	0.00927	0.01031	0.00742	0.00832
73.68	0.00928	0.0102	0.00715	0.00879
73.92	0.00952	0.01013	0.00708	0.00849
74.16	0.00926	0.01021	0.00717	0.00844
74.4	0.00945	0.01031	0.00706	0.00901
74.64	0.00945	0.00994	0.0072	0.00858
74.88	0.00958	0.0102	0.00713	0.00856
75.12	0.00932	0.01029	0.00721	0.00841
75.36	0.00955	0.01017	0.00712	0.00852
75.6	0.0095	0.01023	0.00711	0.00874
75.84	0.00982	0.01028	0.00723	0.00872
76.08	0.00941	0.01033	0.00709	0.00883
76.32	0.00946	0.01029	0.00748	0.00861
76.56	0.00943	0.01035	0.00741	0.00863
76.8	0.00975	0.0104	0.00751	0.00879
77.04	0.00966	0.01031	0.0073	0.00869
77.28	0.0099	0.01011	0.00718	0.00864
77.52	0.00968	0.01026	0.00748	0.00871
77.76	0.00985	0.01033	0.00723	0.00891
78	0.00982	0.01054	0.0077	0.00867
78.24	0.00959	0.0106	0.00739	0.00892
78.48	0.00972	0.01042	0.00732	0.00905
78.72	0.00983	0.01065	0.00738	0.00881
78.96	0.0097	0.01044	0.00742	0.00904
79.2	0.01004	0.01032	0.00727	0.0087
79.44	0.00959	0.01027	0.00757	0.00888
79.68	0.00996	0.01025	0.00721	0.00889
79.92	0.00978	0.01041	0.00742	0.00869
80.16	0.00998	0.0102	0.00721	0.00864
80.4	0.0099	0.01075	0.00767	0.00876
80.64	0.00987	0.01047	0.00751	0.00856
80.88	0.01011	0.01063	0.00738	0.00863
81.12	0.00984	0.01034	0.00729	0.0091
81.36	0.00991	0.01044	0.00759	0.00876
81.6	0.01014	0.01041	0.00725	0.00858
81.84	0.00972	0.01032	0.00756	0.00896
82.08	0.01008	0.01058	0.00728	0.00875
82.32	0.00988	0.01069	0.00739	0.00894
82.56	0.00984	0.01049	0.00736	0.00871
82.8	0.01	0.01066	0.00733	0.00872
83.04	0.01042	0.01044	0.00748	0.00885
83.28	0.01015	0.01038	0.0074	0.00887
83.52	0.00993	0.01055	0.00773	0.009
83.76	0.00982	0.0104	0.00774	0.00902
84	0.00993	0.01037	0.00764	0.00877
84.24	0.01007	0.01068	0.00765	0.00887
84.48	0.00986	0.0104	0.00741	0.00882
84.72	0.0099	0.01049	0.00763	0.00907
84.96	0.01044	0.01063	0.0075	0.00902
85.2	0.01008	0.01069	0.00745	0.00858
85.44	0.00992	0.01061	0.00754	0.00891
85.68	0.00999	0.01061	0.00751	0.00898
85.92	0.00984	0.01053	0.00733	0.00888
86.16	0.00972	0.01073	0.00735	0.00891
86.4	0.01005	0.01067	0.00778	0.00905
86.64	0.01025	0.01063	0.00776	0.00872
86.88	0.01046	0.0108	0.00763	0.00892
87.12	0.01012	0.01052	0.00775	0.00907
87.36	0.01036	0.01043	0.00737	0.00907
87.6	0.00989	0.0106	0.0076	0.00904
87.84	0.01016	0.01091	0.00781	0.00908
88.08	0.01003	0.01058	0.00769	0.00922
88.32	0.01028	0.01052	0.00761	0.0091
88.56	0.01014	0.01066	0.00746	0.00929
88.8	0.01012	0.01055	0.00775	0.00921
89.04	0.00983	0.01077	0.00744	0.00895
89.28	0.01017	0.01038	0.00756	0.0091
89.52	0.01018	0.01059	0.00762	0.00886
89.76	0.01021	0.0107	0.00771	0.00917
90	0.01061	0.01095	0.00756	0.00907
90.24	0.01032	0.0106	0.00753	0.00917
90.48	0.01027	0.01077	0.00774	0.00886
90.72	0.0103	0.01092	0.00772	0.00914
90.96	0.01057	0.01062	0.00746	0.00895
91.2	0.01042	0.01066	0.00785	0.00928
91.44	0.01038	0.01077	0.00766	0.0094
91.68	0.01011	0.01109	0.0076	0.00902
91.92	0.0104	0.01096	0.00763	0.00914
92.16	0.01026	0.01065	0.0076	0.00936
92.4	0.01024	0.01086	0.00764	0.00884
92.64	0.00996	0.01067	0.00775	0.00893
92.88	0.01039	0.01099	0.00749	0.00893
93.12	0.01028	0.01112	0.00799	0.00935
93.36	0.01029	0.01058	0.0079	0.00926
93.6	0.01013	0.01087	0.00797	0.00939
93.84	0.01023	0.01075	0.0075	0.00903
94.08	0.0104	0.0105	0.00777	0.00908
94.32	0.01038	0.01096	0.00764	0.00947
94.56	0.01049	0.01098	0.00776	0.00915
94.8	0.0101	0.01104	0.00745	0.00941
95.04	0.0105	0.01101	0.00777	0.00915
95.28	0.01025	0.01089	0.00776	0.00932
95.52	0.01022	0.01083	0.00785	0.00925
95.76	0.01009	0.0111	0.00782	0.00896
96	0.01013	0.01093	0.00785	0.00914
96.24	0.01036	0.01092	0.00738	0.00949
96.48	0.01045	0.01081	0.00783	0.00942
96.72	0.01035	0.01107	0.00782	0.00914
96.96	0.01036	0.0111	0.00783	0.00912
97.2	0.01034	0.01106	0.0078	0.00909
97.44	0.00993	0.01097	0.00744	0.00915
97.68	0.01051	0.01081	0.00781	0.00902
97.92	0.01047	0.01075	0.00778	0.00925
98.16	0.01032	0.01113	0.00791	0.00922
98.4	0.01016	0.01091	0.00764	0.00929
98.64	0.01035	0.01109	0.0078	0.00916
98.88	0.01002	0.01107	0.00774	0.00909
99.12	0.01035	0.01117	0.00805	0.00949
99.36	0.01044	0.01081	0.00796	0.00913
99.6	0.01024	0.01095	0.00767	0.00924
99.84	0.01024	0.01118	0.00775	0.00933
100.08	0.01071	0.01122	0.00767	0.00908
100.32	0.01068	0.01091	0.00786	0.0091
100.56	0.01026	0.01129	0.00776	0.00945
100.8	0.0103	0.01082	0.00785	0.00916
101.04	0.01026	0.01089	0.00763	0.00927
101.28	0.01058	0.01102	0.00795	0.00903
101.52	0.01066	0.01106	0.00797	0.00933
101.76	0.01035	0.01102	0.00786	0.00949
102	0.01052	0.01064	0.0079	0.00924
102.24	0.01044	0.01105	0.0078	0.00945
102.48	0.0104	0.01096	0.00778	0.00941
102.72	0.01067	0.01082	0.00794	0.00921
102.96	0.01042	0.01109	0.00778	0.00916
103.2	0.0105	0.0109	0.00775	0.00934
103.44	0.01054	0.01091	0.00768	0.00917
103.68	0.01072	0.01115	0.00811	0.00913
103.92	0.01057	0.01102	0.00777	0.00943
104.16	0.01044	0.01111	0.0079	0.00927
104.4	0.01038	0.01073	0.00792	0.00919
104.64	0.01035	0.01093	0.00789	0.00923
104.88	0.01026	0.0111	0.008	0.00936
105.12	0.01048	0.01086	0.00788	0.00924
105.36	0.0104	0.01124	0.00781	0.00927
105.6	0.01086	0.01128	0.00775	0.00911
105.84	0.01061	0.01098	0.00791	0.00941
106.08	0.01058	0.01113	0.00795	0.00914
106.32	0.0106	0.0109	0.00779	0.00953
106.56	0.01018	0.01094	0.00799	0.00944
106.8	0.01066	0.01124	0.00778	0.0093
107.04	0.01043	0.01093	0.00781	0.00956
107.28	0.01056	0.01107	0.00788	0.00917
107.52	0.0106	0.01101	0.00787	0.00927
107.76	0.01053	0.01084	0.00796	0.0094
108	0.0106	0.01092	0.00788	0.00897
108.24	0.01056	0.01092	0.00791	0.00945
108.48	0.0103	0.01096	0.00812	0.00935
108.72	0.01068	0.01115	0.008	0.00946
108.96	0.01043	0.01104	0.00768	0.00954
109.2	0.01085	0.01089	0.00806	0.00938
109.44	0.01105	0.01078	0.00799	0.00936
109.68	0.01057	0.01117	0.00814	0.00954
109.92	0.01048	0.01102	0.00821	0.0094
110.16	0.01052	0.01126	0.00799	0.00948
110.4	0.01062	0.01127	0.00798	0.00974
110.64	0.01079	0.01125	0.00795	0.00948
110.88	0.01048	0.01116	0.00807	0.00938
111.12	0.01085	0.01097	0.0079	0.00935
111.36	0.01053	0.01131	0.00797	0.00942
111.6	0.01061	0.01104	0.0079	0.00944
111.84	0.01089	0.01128	0.00779	0.00934
112.08	0.01055	0.01112	0.00805	0.00945
112.32	0.01056	0.01108	0.00803	0.00944
112.56	0.01065	0.01144	0.00781	0.00951
112.8	0.0107	0.01086	0.00792	0.00955
113.04	0.01051	0.0115	0.00794	0.00961
113.28	0.01064	0.01107	0.00791	0.00945
113.52	0.01064	0.01108	0.00773	0.00915
113.76	0.01066	0.01133	0.00811	0.00945
114	0.01078	0.01119	0.00813	0.00942
114.24	0.01071	0.01104	0.00775	0.00947
114.48	0.01092	0.01134	0.00785	0.00942
114.72	0.01086	0.01147	0.00797	0.00916
114.96	0.01084	0.01074	0.00803	0.00949
115.2	0.01084	0.01124	0.00796	0.00931
115.44	0.01061	0.0111	0.00809	0.00944
115.68	0.01058	0.01119	0.00794	0.00953
115.92	0.01072	0.0114	0.00805	0.00919
116.16	0.01072	0.01114	0.0082	0.0094
116.4	0.01073	0.01137	0.00781	0.00935
116.64	0.0111	0.01115	0.00772	0.00954
116.88	0.01059	0.01124	0.00809	0.00942
117.12	0.01081	0.01152	0.00783	0.0096
117.36	0.01064	0.01105	0.00816	0.00966
117.6	0.01117	0.01145	0.00808	0.00921
117.84	0.01074	0.01111	0.00793	0.00955
118.08	0.01067	0.01149	0.00765	0.00951
118.32	0.01073	0.01114	0.00797	0.00944
118.56	0.01069	0.01127	0.00794	0.00981
118.8	0.01072	0.01153	0.00785	0.00953
119.04	0.01085	0.01104	0.00768	0.00956
119.28	0.01114	0.01125	0.00788	0.00949
119.52	0.01091	0.01117	0.00804	0.00988
119.76	0.0111	0.01125	0.00796	0.00956
120	0.01092	0.01115	0.00802	0.00967
120.24	0.01065	0.01104	0.008	0.00938
120.48	0.01091	0.01152	0.0081	0.00939
120.72	0.0109	0.01096	0.0082	0.00946
120.96	0.01086	0.01143	0.00806	0.0096
121.2	0.01094	0.01127	0.00794	0.00984
121.44	0.01091	0.01139	0.00786	0.00959
121.68	0.01095	0.01111	0.00797	0.00927
121.92	0.01101	0.01134	0.00818	0.00959
122.16	0.01095	0.01091	0.00781	0.00975
122.4	0.01078	0.01141	0.00804	0.00972
122.64	0.01054	0.01135	0.00808	0.00979
122.88	0.01078	0.01125	0.0081	0.00976
123.12	0.01083	0.01098	0.00809	0.00965
123.36	0.01068	0.01117	0.00788	0.00987
123.6	0.01115	0.01119	0.00809	0.0095
123.84	0.01083	0.01109	0.00791	0.00953
124.08	0.01097	0.01129	0.00818	0.0096
124.32	0.01076	0.01118	0.00812	0.00977
124.56	0.01088	0.01156	0.00824	0.00971
124.8	0.01098	0.01119	0.00807	0.00961
125.04	0.01087	0.0114	0.00808	0.00969
125.28	0.01108	0.01108	0.00777	0.00954
125.52	0.01121	0.01097	0.00819	0.00938
125.76	0.01091	0.01117	0.00812	0.0094
126	0.01109	0.01112	0.00806	0.00991
126.24	0.01106	0.01148	0.00826	0.00962
126.48	0.01084	0.01119	0.00836	0.00956
126.72	0.01076	0.01141	0.00813	0.00956
126.96	0.01105	0.01134	0.00806	0.00955
127.2	0.01102	0.01151	0.00802	0.0098
127.44	0.01126	0.01153	0.00825	0.00982
127.68	0.01086	0.01115	0.00803	0.00945
127.92	0.01128	0.01109	0.00803	0.00948
128.16	0.01111	0.0113	0.00797	0.00945
128.4	0.01098	0.01144	0.00801	0.00995
128.64	0.01138	0.01137	0.00796	0.00975
128.88	0.01108	0.01107	0.00792	0.00975
129.12	0.01079	0.01138	0.00789	0.00976
129.36	0.01139	0.0113	0.00816	0.00972
129.6	0.01076	0.01109	0.00831	0.00977
129.84	0.01103	0.01137	0.00785	0.0097
130.08	0.01102	0.01142	0.00795	0.00961
130.32	0.0112	0.01154	0.00811	0.00934
130.56	0.0111	0.01169	0.00828	0.00979
130.8	0.0112	0.01149	0.00815	0.00977
131.04	0.01087	0.01153	0.00816	0.00984
131.28	0.01087	0.01141	0.00837	0.00942
131.52	0.01118	0.01133	0.00816	0.00971
131.76	0.01094	0.01134	0.00821	0.00965
132	0.01115	0.01135	0.00817	0.0101
132.24	0.01103	0.01137	0.00841	0.01009
132.48	0.01125	0.01088	0.00795	0.00973
132.72	0.01086	0.01133	0.00813	0.00982
132.96	0.01108	0.01141	0.00821	0.00984
133.2	0.01084	0.01132	0.00793	0.00956
133.44	0.01119	0.0112	0.00814	0.00954
133.68	0.0109	0.01143	0.00814	0.00963
133.92	0.01093	0.01136	0.00825	0.00997
134.16	0.01079	0.01128	0.00807	0.00971
134.4	0.01105	0.01135	0.00828	0.00975
134.64	0.01099	0.01172	0.00816	0.00957
134.88	0.01117	0.01144	0.00815	0.0099
135.12	0.01099	0.01139	0.00817	0.01006
135.36	0.01128	0.01131	0.00802	0.00965
135.6	0.01085	0.01166	0.00824	0.00999
135.84	0.01086	0.01136	0.00805	0.00935
136.08	0.01146	0.01127	0.00802	0.0096
136.32	0.01144	0.01116	0.00797	0.00987
136.56	0.01113	0.01115	0.00814	0.00966
136.8	0.01128	0.01132	0.00804	0.00977
137.04	0.01134	0.01124	0.00809	0.00975
137.28	0.01067	0.01133	0.00825	0.00972
137.52	0.01122	0.01154	0.00816	0.0098
137.76	0.01132	0.01148	0.00817	0.00979
138	0.01087	0.01151	0.00828	0.00993
138.24	0.0113	0.01122	0.00799	0.00989
138.48	0.01138	0.01133	0.00821	0.00956
138.72	0.01122	0.01148	0.00822	0.00963
138.96	0.01105	0.01168	0.00809	0.01007
139.2	0.0111	0.01115	0.00808	0.00992
139.44	0.0111	0.01181	0.00798	0.0097
139.68	0.01072	0.01145	0.00811	0.00978
139.92	0.01112	0.01141	0.00817	0.00996
140.16	0.0112	0.01148	0.00824	0.00983
140.4	0.01114	0.01146	0.00808	0.0098
140.64	0.01093	0.01139	0.00812	0.00975
140.88	0.0113	0.01161	0.00815	0.01008
141.12	0.01091	0.01142	0.00832	0.01028
141.36	0.01134	0.0113	0.00818	0.00956
141.6	0.01122	0.01133	0.00804	0.01006
141.84	0.01135	0.01146	0.00819	0.00997
142.08	0.01091	0.01148	0.00823	0.01
142.32	0.01141	0.01141	0.00801	0.00992
142.56	0.01084	0.01114	0.00832	0.00976
142.8	0.01089	0.01153	0.00816	0.00998
143.04	0.01115	0.01121	0.00801	0.00972
143.28	0.01125	0.01136	0.00809	0.01011
143.52	0.01148	0.01146	0.00808	0.00974
143.76	0.01117	0.01152	0.00807	0.01012
144	0.01118	0.01143	0.00796	0.00983
144.24	0.01109	0.01155	0.00828	0.00975
144.48	0.01086	0.01125	0.00808	0.01014
144.72	0.01106	0.01131	0.00821	0.00989
144.96	0.01124	0.01147	0.00827	0.00962
145.2	0.0112	0.01143	0.00827	0.00968
145.44	0.01091	0.01187	0.00812	0.00965
145.68	0.01117	0.01143	0.00821	0.01001
145.92	0.01139	0.01141	0.00822	0.00982
146.16	0.0112	0.01127	0.00812	0.00971
146.4	0.01109	0.0116	0.00809	0.01011
146.64	0.01112	0.01158	0.00804	0.00989
146.88	0.01138	0.01149	0.008	0.00948
147.12	0.0113	0.01141	0.00814	0.00981
147.36	0.01127	0.01135	0.0079	0.00986
147.6	0.01122	0.01151	0.00799	0.01007
147.84	0.01105	0.01133	0.00828	0.00982
148.08	0.01092	0.0114	0.00824	0.00989
148.32	0.01141	0.01168	0.00818	0.01001
148.56	0.01116	0.01126	0.00799	0.01006
148.8	0.0112	0.01132	0.00856	0.00993
149.04	0.01145	0.01135	0.00809	0.00997
149.28	0.0113	0.01142	0.00833	0.00965
149.52	0.01114	0.0114	0.00828	0.0099
149.76	0.01141	0.01149	0.00826	0.00996
150	0.01149	0.01162	0.00839	0.01008
150.24	0.01199	0.01181	0.00896	0.01039
150.48	0.01303	0.01288	0.00929	0.01101
150.72	0.00044	-0.00022	-0.0023	-0.00109
150.96	-0.05083	-0.05431	-0.05305	-0.05338
151.2	0.03882	0.04037	0.03271	0.03513
151.44	-0.00686	-0.00926	-0.01061	-0.01003
151.68	0.01609	0.01528	0.0125	0.01324
151.92	0.01604	0.01544	0.01237	0.01374
152.16	0.01653	0.01584	0.01261	0.01392
152.4	0.01664	0.01587	0.01274	0.01416
152.64	0.01743	0.01662	0.01308	0.01417
152.88	0.0175	0.01666	0.01319	0.01465
153.12	0.01801	0.01731	0.0138	0.01489
153.36	0.01788	0.01705	0.01383	0.01516
153.6	0.0181	0.01723	0.01401	0.01536
153.84	0.0185	0.01751	0.01439	0.01533
154.08	0.01882	0.01787	0.01434	0.01568
154.32	0.01894	0.01793	0.0148	0.01596
154.56	0.01916	0.01833	0.01468	0.01585
154.8	0.01979	0.01834	0.01462	0.01593
155.04	0.0196	0.01856	0.01492	0.01626
155.28	0.01977	0.01821	0.01513	0.01638
155.52	0.01991	0.01865	0.0151	0.01622
155.76	0.02012	0.0189	0.01526	0.01647
156	0.02026	0.01868	0.0154	0.01689
156.24	0.02036	0.01899	0.01526	0.01684
156.48	0.02075	0.01903	0.01555	0.01684
156.72	0.02019	0.01898	0.01574	0.01674
156.96	0.021	0.01915	0.01574	0.01717
157.2	0.02098	0.01957	0.01609	0.01711
157.44	0.02118	0.01917	0.01596	0.0171
157.68	0.02142	0.01966	0.01583	0.01765
157.92	0.02157	0.01965	0.01626	0.01751
158.16	0.02121	0.01971	0.01601	0.01768
158.4	0.02132	0.01991	0.01621	0.01749
158.64	0.02167	0.01996	0.01655	0.01732
158.88	0.02153	0.01975	0.01626	0.0178
159.12	0.02182	0.02	0.01656	0.01797
159.36	0.02163	0.02019	0.01641	0.01747
159.6	0.02131	0.02011	0.01646	0.01799
159.84	0.02207	0.02006	0.01667	0.01783
160.08	0.02201	0.02019	0.01649	0.0178
160.32	0.02197	0.02036	0.01699	0.01808
160.56	0.022	0.02022	0.01672	0.0183
160.8	0.02208	0.02033	0.01692	0.01785
161.04	0.02238	0.02046	0.01665	0.01844
161.28	0.02258	0.02045	0.01707	0.01848
161.52	0.02248	0.02058	0.01716	0.0185
161.76	0.02259	0.02048	0.01694	0.01827
162	0.0228	0.02055	0.0172	0.01819
162.24	0.02251	0.02073	0.01701	0.0187
162.48	0.02265	0.02045	0.017	0.0187
162.72	0.0228	0.02044	0.01709	0.0184
162.96	0.02271	0.02069	0.01688	0.01821
163.2	0.02259	0.02042	0.01733	0.01877
163.44	0.02257	0.02048	0.01726	0.01848
163.68	0.02285	0.02104	0.01737	0.01864
163.92	0.02332	0.02104	0.01703	0.01818
164.16	0.02317	0.02074	0.01722	0.01874
164.4	0.02286	0.02095	0.01731	0.01902
164.64	0.02322	0.02068	0.01728	0.01861
164.88	0.0234	0.02097	0.01744	0.01878
165.12	0.02327	0.02104	0.01745	0.01888
165.36	0.02308	0.02086	0.01749	0.01867
165.6	0.02333	0.02113	0.01763	0.01866
165.84	0.02297	0.02108	0.01774	0.01894
166.08	0.02331	0.02161	0.01744	0.01914
166.32	0.0234	0.02105	0.01722	0.01907
166.56	0.02301	0.02129	0.01736	0.019
166.8	0.02361	0.02101	0.0172	0.01887
167.04	0.02359	0.02117	0.01745	0.01874
167.28	0.02345	0.02085	0.01767	0.01901
167.52	0.02348	0.02134	0.01776	0.01863
167.76	0.02355	0.02114	0.01744	0.01946
168	0.02366	0.02142	0.01773	0.01892
168.24	0.02363	0.02137	0.01756	0.01916
168.48	0.02388	0.02138	0.01743	0.01896
168.72	0.02366	0.02114	0.01742	0.0191
168.96	0.02338	0.02134	0.01749	0.01937
169.2	0.02381	0.02115	0.01777	0.01942
169.44	0.02402	0.02147	0.01752	0.0194
169.68	0.02364	0.02131	0.01777	0.01922
169.92	0.02369	0.02119	0.01758	0.01931
170.16	0.02363	0.02159	0.01767	0.01936
170.4	0.02397	0.02164	0.01754	0.01921
170.64	0.02368	0.02092	0.01784	0.01934
170.88	0.02384	0.02141	0.01811	0.01915
171.12	0.02388	0.02147	0.01789	0.01947
171.36	0.02451	0.02162	0.01779	0.01951
171.6	0.02363	0.02157	0.0177	0.01917
171.84	0.02406	0.02193	0.01773	0.01954
172.08	0.02396	0.02156	0.01759	0.01926
172.32	0.02441	0.0216	0.01798	0.01937
172.56	0.02434	0.02171	0.01792	0.01956
172.8	0.02407	0.02161	0.01766	0.01914
173.04	0.02449	0.0215	0.01774	0.01959
173.28	0.02381	0.02148	0.01813	0.01942
173.52	0.02416	0.02194	0.01808	0.01965
173.76	0.02418	0.02177	0.01812	0.01945
174	0.02451	0.02179	0.01789	0.01963
174.24	0.02456	0.02159	0.01811	0.01992
174.48	0.02425	0.02199	0.01798	0.01973
174.72	0.02404	0.02167	0.01799	0.01974
174.96	0.02441	0.02187	0.01802	0.01949
175.2	0.02409	0.02177	0.01809	0.0197
175.44	0.02414	0.0216	0.01825	0.01946
175.68	0.0248	0.02204	0.0178	0.01961
175.92	0.02451	0.02198	0.01811	0.01944
176.16	0.0246	0.02188	0.01829	0.01957
176.4	0.02411	0.02211	0.01797	0.01961
176.64	0.02447	0.0218	0.01825	0.01973
176.88	0.0246	0.02215	0.01818	0.0196
177.12	0.02412	0.02213	0.01806	0.01959
177.36	0.02448	0.02205	0.01816	0.01996
177.6	0.02426	0.02193	0.01815	0.01944
177.84	0.02472	0.02211	0.01855	0.01997
178.08	0.02455	0.02223	0.01846	0.01979
178.32	0.02517	0.02215	0.01832	0.01991
178.56	0.0242	0.02185	0.01835	0.02
178.8	0.02462	0.02227	0.01805	0.01968
179.04	0.02476	0.02175	0.01822	0.01977
179.28	0.02466	0.02217	0.0183	0.01969
179.52	0.02464	0.02185	0.01816	0.02007
179.76	0.02443	0.02219	0.01803	0.01962
180	0.02465	0.02209	0.01844	0.02004
180.24	0.0243	0.02183	0.01836	0.01984
180.48	0.02479	0.02199	0.01828	0.01995
180.72	0.02442	0.02192	0.0184	0.01951
180.96	0.02451	0.02212	0.01817	0.01954
181.2	0.02468	0.02205	0.01831	0.02002
181.44	0.02453	0.02194	0.01837	0.02
181.68	0.0248	0.02202	0.01843	0.01989
181.92	0.02474	0.02202	0.01816	0.02007
182.16	0.02444	0.02212	0.01823	0.02006
182.4	0.02505	0.02214	0.01846	0.02018
182.64	0.02512	0.02236	0.01845	0.02045
182.88	0.02479	0.02191	0.01858	0.01986
183.12	0.02496	0.02231	0.01834	0.01998
183.36	0.02516	0.02225	0.01839	0.02028
183.6	0.02484	0.0223	0.01866	0.01999
183.84	0.02496	0.02208	0.01851	0.02
184.08	0.02521	0.02225	0.01866	0.01991
184.32	0.02506	0.02255	0.01849	0.02
184.56	0.02488	0.02215	0.01821	0.0202
184.8	0.02502	0.02221	0.01816	0.01977
185.04	0.02527	0.02269	0.01806	0.02004
185.28	0.02522	0.02227	0.01882	0.02031
185.52	0.02489	0.02222	0.01835	0.01987
185.76	0.02509	0.02234	0.01842	0.02011
186	0.02477	0.0226	0.01823	0.01992
186.24	0.02523	0.02209	0.01854	0.01979
186.48	0.02485	0.0224	0.0185	0.02006
186.72	0.02516	0.02239	0.01849	0.02001
186.96	0.02504	0.02249	0.01837	0.02013
187.2	0.02502	0.02233	0.01836	0.01982
187.44	0.02501	0.0226	0.01822	0.02003
187.68	0.02503	0.02215	0.01835	0.02008
187.92	0.02478	0.02226	0.01846	0.02021
188.16	0.0255	0.02246	0.01856	0.0202
188.4	0.02539	0.0226	0.01836	0.02025
188.64	0.02533	0.0224	0.0185	0.02028
188.88	0.02489	0.02242	0.01827	0.02039
189.12	0.02487	0.02284	0.01875	0.02013
189.36	0.02526	0.02209	0.01853	0.0199
189.6	0.02525	0.02248	0.01837	0.02
189.84	0.02495	0.02258	0.01833	0.02005
190.08	0.02534	0.02245	0.01858	0.02012
190.32	0.02518	0.02239	0.01841	0.01991
190.56	0.0251	0.02239	0.01867	0.02017
190.8	0.02516	0.02234	0.01842	0.02012
191.04	0.02524	0.02264	0.01853	0.02014
191.28	0.0248	0.02245	0.01864	0.02018
191.52	0.02525	0.02256	0.01853	0.02005
191.76	0.02543	0.02265	0.01857	0.02034
192	0.02541	0.02245	0.01855	0.02005
192.24	0.0251	0.02242	0.01871	0.02005
192.48	0.02534	0.02233	0.01877	0.02024
192.72	0.02529	0.02262	0.01849	0.02011
192.96	0.02552	0.02215	0.01849	0.0203
193.2	0.0254	0.023	0.01859	0.02012
193.44	0.02563	0.02263	0.01842	0.02032
193.68	0.02511	0.02259	0.01849	0.02039
193.92	0.02571	0.02257	0.01868	0.02026
194.16	0.02505	0.02244	0.01852	0.01991
194.4	0.02472	0.02249	0.0185	0.02014
194.64	0.02538	0.02254	0.01854	0.02021
194.88	0.02534	0.02266	0.0187	0.02006
195.12	0.0252	0.02251	0.01832	0.02025
195.36	0.0255	0.02275	0.01875	0.02024
195.6	0.02549	0.02258	0.01879	0.02026
195.84	0.02492	0.02255	0.01851	0.02036
196.08	0.02513	0.02262	0.01899	0.02009
196.32	0.02555	0.02259	0.01875	0.02059
196.56	0.02528	0.02274	0.01855	0.02026
196.8	0.02566	0.02294	0.01876	0.02001
197.04	0.02504	0.02263	0.01882	0.02054
197.28	0.02535	0.02258	0.01856	0.01992
197.52	0.02549	0.02244	0.01849	0.02036
197.76	0.02555	0.02258	0.01869	0.02051
198	0.02565	0.02238	0.01863	0.02016
198.24	0.02506	0.02223	0.01883	0.0203
198.48	0.0253	0.02216	0.01861	0.02032
198.72	0.02551	0.02275	0.01893	0.02042
198.96	0.0252	0.02284	0.01882	0.02044
199.2	0.02508	0.02247	0.0187	0.02032
199.44	0.02524	0.02242	0.0186	0.02041
199.68	0.02525	0.02282	0.01834	0.02046
199.92	0.0249	0.02265	0.01867	0.02062
200.16	0.02562	0.02248	0.01859	0.02037
200.4	0.0255	0.02277	0.0188	0.02028
200.64	0.02502	0.02303	0.01881	0.02022
200.88	0.0253	0.02223	0.01831	0.02065
201.12	0.02565	0.02288	0.01864	0.0206
201.36	0.02543	0.02271	0.01852	0.02023
201.6	0.02551	0.02301	0.01866	0.02036
201.84	0.02517	0.02284	0.01867	0.02038
202.08	0.02538	0.02305	0.01902	0.02021
202.32	0.02569	0.02276	0.01853	0.02041
202.56	0.02568	0.0224	0.0189	0.02023
202.8	0.02547	0.02248	0.01844	0.02035
203.04	0.02557	0.02296	0.01867	0.02016
203.28	0.02553	0.02266	0.01875	0.02017
203.52	0.02575	0.02289	0.01855	0.02039
203.76	0.02523	0.02249	0.01882	0.02058
204	0.02544	0.0227	0.01856	0.02028
204.24	0.02599	0.02247	0.01882	0.0205
204.48	0.02524	0.02263	0.0188	0.02077
204.72	0.02537	0.02284	0.01866	0.02018
204.96	0.02529	0.02273	0.01849	0.02059
205.2	0.02577	0.02287	0.01874	0.02037
205.44	0.02577	0.02264	0.01845	0.02034
205.68	0.02542	0.02283	0.01865	0.02064
205.92	0.02574	0.02265	0.01877	0.02039
206.16	0.02567	0.02277	0.01891	0.02034
206.4	0.02545	0.02269	0.01855	0.02023
206.64	0.02525	0.02271	0.01858	0.02043
206.88	0.02548	0.0228	0.01859	0.02027
207.12	0.02531	0.02245	0.01866	0.02085
207.36	0.02521	0.02286	0.01866	0.0205
207.6	0.02563	0.02259	0.01855	0.02034
207.84	0.02564	0.02275	0.01874	0.02071
208.08	0.02519	0.02284	0.01895	0.02023
208.32	0.02559	0.02274	0.01873	0.02048
208.56	0.0257	0.02276	0.01863	0.02026
208.8	0.0256	0.02282	0.01842	0.02057
209.04	0.02571	0.02294	0.01867	0.02058
209.28	0.02565	0.02292	0.01889	0.02049
209.52	0.02528	0.02264	0.01862	0.02051
209.76	0.02578	0.0229	0.01852	0.02052
210	0.02532	0.02294	0.01863	0.02061
210.24	0.02567	0.02286	0.01858	0.02063
210.48	0.02545	0.02286	0.01884	0.02013
210.72	0.02565	0.02295	0.01827	0.02049
210.96	0.02563	0.02287	0.01842	0.02053
211.2	0.02587	0.02289	0.01843	0.02045
211.44	0.02556	0.0227	0.0187	0.02036
211.68	0.02541	0.02269	0.0187	0.02022
211.92	0.02537	0.0225	0.01859	0.02052
212.16	0.02557	0.02292	0.01833	0.02052
212.4	0.02516	0.0227	0.01861	0.02041
212.64	0.02523	0.02278	0.01864	0.02032
212.88	0.02562	0.02308	0.0186	0.02051
213.12	0.02562	0.02301	0.0186	0.02053
213.36	0.02586	0.02295	0.01867	0.02042
213.6	0.02556	0.02313	0.01847	0.02017
213.84	0.02542	0.0228	0.01857	0.02049
214.08	0.02548	0.02259	0.01857	0.0205
214.32	0.02538	0.0227	0.01833	0.02045
214.56	0.02552	0.0229	0.01864	0.02025
214.8	0.0249	0.02271	0.01855	0.02051
215.04	0.02544	0.02248	0.01872	0.0205
215.28	0.02565	0.02323	0.01888	0.02042
215.52	0.02568	0.02271	0.01832	0.02044
215.76	0.0253	0.02295	0.0186	0.02071
216	0.02523	0.02298	0.01857	0.0206
216.24	0.0254	0.02288	0.01844	0.02064
216.48	0.02533	0.0227	0.0186	0.02016
216.72	0.02571	0.02245	0.01873	0.02055
216.96	0.02537	0.02253	0.01845	0.02024
217.2	0.02538	0.02302	0.01861	0.02058
217.44	0.02527	0.02283	0.01877	0.02049
217.68	0.02558	0.02277	0.01879	0.02053
217.92	0.02533	0.02292	0.01862	0.02005
218.16	0.02553	0.02266	0.01875	0.02024
218.4	0.02579	0.02283	0.01869	0.02043
218.64	0.02512	0.02256	0.01845	0.0206
218.88	0.02538	0.02262	0.01833	0.02049
219.12	0.0255	0.02252	0.01871	0.02047
219.36	0.02532	0.02304	0.01874	0.0204
219.6	0.02563	0.02244	0.01862	0.02051
219.84	0.02513	0.02276	0.01858	0.0206
220.08	0.02553	0.0227	0.01869	0.02029
220.32	0.02555	0.02267	0.01885	0.02047
220.56	0.02564	0.02277	0.01864	0.02009
220.8	0.02579	0.02284	0.01857	0.02068
221.04	0.02561	0.02273	0.01847	0.02067
221.28	0.0251	0.02295	0.01831	0.02057
221.52	0.02535	0.02316	0.01857	0.02055
221.76	0.02568	0.02274	0.01856	0.02028
222	0.0255	0.02276	0.0186	0.02075
222.24	0.02508	0.02316	0.01859	0.02028
222.48	0.0257	0.02276	0.01871	0.02045
222.72	0.02575	0.02281	0.0183	0.02026
222.96	0.02554	0.02256	0.01847	0.02073
223.2	0.02568	0.02271	0.01825	0.02049
223.44	0.02565	0.0228	0.01862	0.0208
223.68	0.02542	0.02296	0.01853	0.02062
223.92	0.02541	0.02296	0.01882	0.02068
224.16	0.02526	0.023	0.01838	0.0205
224.4	0.02579	0.02302	0.01839	0.02044
224.64	0.02545	0.0232	0.01827	0.02021
224.88	0.0256	0.02272	0.01831	0.02023
225.12	0.02571	0.02318	0.01861	0.02063
225.36	0.02521	0.02271	0.01835	0.02049
225.6	0.02551	0.02307	0.01823	0.02037
225.84	0.02539	0.02307	0.01827	0.02038
226.08	0.02546	0.02301	0.01868	0.02077
226.32	0.02525	0.02296	0.01869	0.02073
226.56	0.02547	0.02296	0.01848	0.02064
226.8	0.02535	0.02279	0.01837	0.02057
227.04	0.02567	0.02266	0.01848	0.02051
227.28	0.02552	0.02284	0.01825	0.0204
227.52	0.02552	0.02301	0.01852	0.02051
227.76	0.02509	0.02305	0.01848	0.02086
228	0.02527	0.02273	0.01846	0.02052
228.24	0.02567	0.02284	0.01858	0.02074
228.48	0.02555	0.02268	0.01819	0.02057
228.72	0.02538	0.02302	0.0185	0.02048
228.96	0.02568	0.02328	0.01837	0.02061
229.2	0.02527	0.02284	0.01846	0.02041
229.44	0.0253	0.02293	0.0188	0.02039
229.68	0.02536	0.02303	0.01811	0.02022
229.92	0.02557	0.02275	0.01822	0.02047
230.16	0.02526	0.02311	0.01848	0.02016
230.4	0.02552	0.02294	0.01824	0.02032
230.64	0.02534	0.02284	0.01848	0.02023
230.88	0.02612	0.02274	0.01865	0.02046
231.12	0.0256	0.02286	0.01859	0.0202
231.36	0.02522	0.02302	0.01854	0.02036
231.6	0.02571	0.02256	0.01852	0.02083
231.84	0.02534	0.02309	0.01858	0.02051
232.08	0.02564	0.02287	0.01861	0.0206
232.32	0.02541	0.02321	0.01844	0.02052
232.56	0.02573	0.02294	0.01835	0.02086
232.8	0.02546	0.02297	0.01843	0.02027
233.04	0.0255	0.02271	0.01828	0.02039
233.28	0.02596	0.02306	0.01842	0.02032
233.52	0.02544	0.0228	0.01857	0.02054
233.76	0.02568	0.02282	0.0182	0.02032
234	0.02537	0.02267	0.01865	0.02065
234.24	0.02588	0.02313	0.01824	0.02025
234.48	0.02584	0.02269	0.01817	0.02034
234.72	0.02549	0.02289	0.01873	0.02055
234.96	0.0255	0.02301	0.01843	0.02059
235.2	0.02561	0.02301	0.01813	0.02055
235.44	0.02562	0.02322	0.01861	0.02016
235.68	0.02543	0.02271	0.01838	0.02069
235.92	0.02531	0.02266	0.01825	0.02065
236.16	0.02542	0.02261	0.01846	0.02049
236.4	0.02588	0.0228	0.01818	0.02001
236.64	0.02549	0.02287	0.01857	0.02038
236.88	0.02531	0.02248	0.0184	0.02042
237.12	0.02505	0.02284	0.01829	0.02036
237.36	0.02498	0.0227	0.01858	0.02009
237.6	0.0253	0.02286	0.01833	0.02038
237.84	0.0254	0.02258	0.0183	0.02021
238.08	0.02502	0.02291	0.01825	0.02049
238.32	0.02523	0.02283	0.01846	0.0203
238.56	0.02564	0.02299	0.01831	0.02007
238.8	0.02551	0.02284	0.01823	0.02019
239.04	0.02525	0.02271	0.01823	0.02051
239.28	0.02588	0.02277	0.01829	0.02057
239.52	0.02542	0.02264	0.01818	0.02031
239.76	0.02535	0.02299	0.01871	0.02057

## Sheet: AGS1
Time	Exp1	Exp2	Exp3	Exp4
0	-0.00017	0.00024	0.00019	4e-05
0.24	5e-05	0.00011	2e-05	-0.0001
0.48	0.00019	0.00015	-7e-05	-2e-05
0.72	-0.00047	0.00021	-0.00034	0.00033
0.96	7e-05	-3e-05	-5e-05	0.00027
1.2	-9e-05	0.00018	-1e-05	0.00013
1.44	6e-05	8e-05	7e-05	-2e-05
1.68	0	5e-05	7e-05	0.00021
1.92	0.0001	5e-05	0.00011	6e-05
2.16	0.00017	-0.00014	-3e-05	7e-05
2.4	-0.00011	0.0002	9e-05	1e-05
2.64	-0.00015	0.00021	0.00025	0.00014
2.88	-5e-05	-0.00011	0.00018	0.00012
3.12	-0.00036	0.0001	-3e-05	4e-05
3.36	0	-9e-05	-4e-05	-0.0001
3.6	-0.00024	0.0001	9e-05	-1e-05
3.84	-0.00018	-5e-05	0.00026	0.00021
4.08	0.00052	-7e-05	0.00014	0
4.32	5e-05	-0.00017	0.0001	0.00019
4.56	0.0001	1e-05	0.0002	5e-05
4.8	0.00034	0.00022	0.00019	0.00011
5.04	0.00029	0.00033	0.00018	0.0002
5.28	-3e-05	3e-05	-0.00038	1e-05
5.52	0.00017	0.00028	3e-05	0.00016
5.76	-0.00019	-0.00019	0	-5e-05
6	0.00038	0.00013	-0.0002	1e-05
6.24	0.00037	0.00012	0.00019	0.00014
6.48	-0.00021	0.00014	-8e-05	-0.00024
6.72	0.00018	0.00025	4e-05	0.00011
6.96	4e-05	-3e-05	-2e-05	0.00019
7.2	-6e-05	3e-05	-0.00018	-3e-05
7.44	8e-05	0.00019	-0.00011	2e-05
7.68	-0.00011	0.00012	0.00012	-0.00019
7.92	0.00024	-0.00017	-5e-05	0.00027
8.16	0	0.00012	4e-05	0.00031
8.4	7e-05	-0.00014	-3e-05	0.0003
8.64	-0.0001	3e-05	8e-05	-4e-05
8.88	0.00041	0.00022	9e-05	-2e-05
9.12	0.00039	-4e-05	0.00019	9e-05
9.36	9e-05	-1e-05	0.0001	9e-05
9.6	-6e-05	-0.00014	9e-05	0.00016
9.84	2e-05	-0.00036	-9e-05	-5e-05
10.08	0.0001	-3e-05	0	-0.00012
10.32	0.00012	7e-05	-6e-05	7e-05
10.56	-0.00017	0.00017	5e-05	0.00023
10.8	0.00016	0.00031	-1e-05	-3e-05
11.04	7e-05	-0.00013	-0.00023	0.00016
11.28	-0.00021	0.00012	-1e-05	-0.00025
11.52	-0.00028	0.00018	5e-05	-0.00015
11.76	0.00036	0.0003	-0.00011	0.00016
12	-8e-05	-6e-05	0.00016	4e-05
12.24	8e-05	-0.00012	-0.00013	-5e-05
12.48	-1e-05	3e-05	0.00015	-0.00012
12.72	0.00025	-2e-05	7e-05	6e-05
12.96	4e-05	-0.00016	0.00022	-5e-05
13.2	4e-05	0.00017	1e-05	-0.00026
13.44	0.00019	9e-05	3e-05	-4e-05
13.68	0.00019	1e-05	1e-05	-0.0001
13.92	-0.00032	-1e-05	4e-05	0.00016
14.16	-0.00028	0.00031	-0.00014	-2e-05
14.4	-8e-05	0.00011	-0.00016	-0.00013
14.64	0.00025	-0.00022	-0.0003	-0.00019
14.88	-0.00023	-0.00023	8e-05	0.00016
15.12	0.00018	-6e-05	-0.00024	0.00015
15.36	-8e-05	1e-05	-0.00016	0.0001
15.6	-0.00017	0.00033	0.00017	0.00018
15.84	-0.00019	-0.00023	7e-05	-3e-05
16.08	-6e-05	9e-05	0	0.00011
16.32	9e-05	0	4e-05	-6e-05
16.56	0.00017	0	0.00024	0.00023
16.8	-2e-05	-0.00013	0.0001	-0.00011
17.04	0.00021	-2e-05	3e-05	0.00019
17.28	-0.00012	4e-05	6e-05	-9e-05
17.52	-0.00024	-0.00017	0.00016	-8e-05
17.76	6e-05	-0.00013	-1e-05	-8e-05
18	0.00011	-0.00013	9e-05	-0.00018
18.24	0.00025	-1e-05	0	8e-05
18.48	0.00025	-2e-05	-9e-05	0.0001
18.72	-0.00016	1e-05	-1e-05	0.00021
18.96	2e-05	0	0.00011	9e-05
19.2	-0.00013	-0.00017	-9e-05	-2e-05
19.44	-0.00016	-0.00028	-0.00022	1e-05
19.68	-1e-05	0.00011	0.00011	9e-05
19.92	-0.00031	9e-05	-0.00011	-0.0002
20.16	-2e-05	0.00029	7e-05	-0.0001
20.4	-4e-05	-7e-05	-0.00031	-0.00013
20.64	-0.00029	-9e-05	-0.00015	-3e-05
20.88	-6e-05	0.00017	0.00022	-0.0001
21.12	0.00023	-0.0002	0.00011	-5e-05
21.36	-0.00025	0.00011	-0.00028	-0.00024
21.6	0	0.00017	3e-05	-0.0003
21.84	-0.0001	-0.00014	0.00028	0
22.08	6e-05	8e-05	-0.00014	-1e-05
22.32	-0.0001	-0.00025	8e-05	7e-05
22.56	-0.00013	-0.00018	-0.00043	-4e-05
22.8	0.00012	2e-05	-0.00022	5e-05
23.04	-0.00012	6e-05	0.00016	-1e-05
23.28	-0.00016	-0.00013	0.00011	2e-05
23.52	-0.00016	-0.00014	0.00012	-2e-05
23.76	2e-05	0.00013	-0.00027	-9e-05
24	-0.00016	7e-05	-2e-05	-0.00024
24.24	-8e-05	-0.00016	0.00021	-4e-05
24.48	6e-05	0	-0.00041	0
24.72	0.00033	-0.00028	-2e-05	7e-05
24.96	-0.00051	-0.00031	8e-05	-0.00025
25.2	-0.00012	-0.00033	-5e-05	-0.00027
25.44	2e-05	-0.0001	-0.00016	-9e-05
25.68	3e-05	-4e-05	1e-05	-0.00022
25.92	8e-05	-8e-05	-3e-05	-0.00017
26.16	-0.0001	-0.00011	-1e-05	-0.00013
26.4	-0.0002	-0.00041	0.00014	-0.00023
26.64	0.00026	1e-05	-3e-05	-0.0001
26.88	0.00017	-0.00013	-8e-05	-0.00012
27.12	0.00012	-3e-05	8e-05	-4e-05
27.36	-6e-05	-9e-05	-0.00052	-0.00018
27.6	-0.00016	0.00013	6e-05	-0.0003
27.84	-3e-05	3e-05	-6e-05	0.0001
28.08	-7e-05	-0.00026	0.00012	-0.00012
28.32	0.00029	2e-05	-2e-05	9e-05
28.56	-0.00036	-0.00014	-6e-05	-3e-05
28.8	-0.0002	-3e-05	-1e-05	-0.00019
29.04	-0.00019	5e-05	5e-05	0.00019
29.28	5e-05	-3e-05	-3e-05	-0.00015
29.52	-0.00028	-0.00016	-0.00016	-7e-05
29.76	7e-05	-7e-05	-0.00016	-0.00024
30	0.00034	0.00015	0	-1e-05
30.24	0.00035	0.00017	1e-05	3e-05
30.48	0.00011	0.00035	9e-05	0.00052
30.72	-0.00947	-0.00971	-0.00868	-0.00947
30.96	-0.05487	-0.05933	-0.05151	-0.05545
31.2	0.02174	0.02202	0.01867	0.02027
31.44	-0.01775	-0.01968	-0.01704	-0.01825
31.68	0.00124	0.0018	0.0009	0.00145
31.92	0.00146	0.0021	0.00106	0.00143
32.16	0.00149	0.00217	0.00131	0.00168
32.4	0.00191	0.0027	0.00158	0.00228
32.64	0.00216	0.003	0.00142	0.00245
32.88	0.00243	0.00377	0.00198	0.00281
33.12	0.00259	0.00399	0.00238	0.00326
33.36	0.00284	0.00445	0.00257	0.00348
33.6	0.00303	0.0048	0.00281	0.00376
33.84	0.00367	0.00526	0.00296	0.00385
34.08	0.00394	0.00551	0.00314	0.00397
34.32	0.00472	0.00575	0.00341	0.00489
34.56	0.0042	0.00604	0.00355	0.00497
34.8	0.00505	0.0066	0.00384	0.00551
35.04	0.00498	0.00681	0.00406	0.00569
35.28	0.00556	0.00699	0.00423	0.00589
35.52	0.00558	0.00738	0.00431	0.00596
35.76	0.00594	0.0075	0.00482	0.00617
36	0.00596	0.00769	0.00499	0.00629
36.24	0.00617	0.00811	0.005	0.00627
36.48	0.00646	0.00838	0.00513	0.00696
36.72	0.00659	0.0084	0.00519	0.00696
36.96	0.00677	0.00913	0.00524	0.007
37.2	0.00694	0.00894	0.00608	0.00711
37.44	0.00728	0.00903	0.00573	0.00734
37.68	0.00754	0.00907	0.00556	0.00763
37.92	0.0078	0.0095	0.00606	0.00762
38.16	0.00759	0.00959	0.00591	0.00782
38.4	0.00811	0.00983	0.00639	0.00786
38.64	0.00827	0.01018	0.00638	0.00794
38.88	0.00829	0.01042	0.00632	0.00842
39.12	0.00849	0.01019	0.0065	0.00842
39.36	0.00898	0.01043	0.00653	0.0086
39.6	0.00852	0.01059	0.0069	0.00864
39.84	0.009	0.01053	0.00689	0.00862
40.08	0.009	0.01072	0.00688	0.00851
40.32	0.00902	0.01104	0.00719	0.00892
40.56	0.00884	0.01115	0.00711	0.00908
40.8	0.00929	0.01111	0.00719	0.00915
41.04	0.00944	0.01118	0.00722	0.00915
41.28	0.00951	0.01112	0.00734	0.00917
41.52	0.00955	0.01142	0.00735	0.00929
41.76	0.00948	0.01168	0.0074	0.0093
42	0.00955	0.01165	0.0075	0.00913
42.24	0.01002	0.01174	0.00736	0.00947
42.48	0.01034	0.01162	0.00749	0.00965
42.72	0.00992	0.01218	0.00768	0.00961
42.96	0.01036	0.01179	0.00775	0.00949
43.2	0.01037	0.01222	0.00786	0.00973
43.44	0.01033	0.01222	0.00768	0.00983
43.68	0.01063	0.01212	0.00791	0.00978
43.92	0.01082	0.01255	0.00806	0.01006
44.16	0.01059	0.01233	0.00801	0.00985
44.4	0.011	0.01252	0.00782	0.01021
44.64	0.0112	0.01272	0.00832	0.01015
44.88	0.01136	0.01234	0.00806	0.00982
45.12	0.01104	0.0125	0.0084	0.01031
45.36	0.01114	0.01282	0.00812	0.0104
45.6	0.01126	0.01271	0.00841	0.01045
45.84	0.01103	0.01302	0.00816	0.01025
46.08	0.01093	0.01282	0.00841	0.01032
46.32	0.01085	0.01252	0.00853	0.01054
46.56	0.01149	0.0132	0.0086	0.0106
46.8	0.01163	0.01293	0.00875	0.01042
47.04	0.01166	0.01318	0.00876	0.01051
47.28	0.01147	0.01306	0.00841	0.01054
47.52	0.01125	0.01312	0.00891	0.01061
47.76	0.01162	0.01323	0.00864	0.0106
48	0.01159	0.01374	0.00863	0.01073
48.24	0.01175	0.01347	0.00876	0.0106
48.48	0.01204	0.01336	0.00894	0.01084
48.72	0.01127	0.01346	0.00868	0.01112
48.96	0.01203	0.01333	0.0089	0.01062
49.2	0.01219	0.01387	0.00892	0.01093
49.44	0.01173	0.01359	0.0089	0.01098
49.68	0.01223	0.01347	0.00883	0.01093
49.92	0.01203	0.01358	0.00891	0.01079
50.16	0.01188	0.01354	0.00877	0.01084
50.4	0.01237	0.01373	0.00897	0.01095
50.64	0.01224	0.01365	0.00905	0.01104
50.88	0.0123	0.01375	0.00881	0.0111
51.12	0.01222	0.01411	0.00916	0.01131
51.36	0.01224	0.0137	0.00926	0.01065
51.6	0.01282	0.01418	0.00906	0.01104
51.84	0.01276	0.01396	0.00894	0.01102
52.08	0.01226	0.01395	0.00927	0.01121
52.32	0.01242	0.01416	0.00935	0.01139
52.56	0.01232	0.01403	0.00914	0.01111
52.8	0.01226	0.01391	0.00918	0.01115
53.04	0.01247	0.014	0.00906	0.0112
53.28	0.01253	0.01419	0.00919	0.01161
53.52	0.01279	0.01432	0.00883	0.01118
53.76	0.01269	0.0142	0.00914	0.01117
54	0.01322	0.01426	0.00916	0.01144
54.24	0.01278	0.01453	0.00954	0.01128
54.48	0.01259	0.01442	0.00938	0.01122
54.72	0.0129	0.0143	0.00932	0.01109
54.96	0.01272	0.01468	0.00933	0.01136
55.2	0.0128	0.01435	0.00964	0.01158
55.44	0.01267	0.01478	0.00955	0.01141
55.68	0.01259	0.01412	0.00944	0.01127
55.92	0.01273	0.01437	0.00951	0.01128
56.16	0.01308	0.01433	0.00947	0.0114
56.4	0.01251	0.01446	0.00956	0.01147
56.64	0.01294	0.01463	0.0097	0.01159
56.88	0.01262	0.01435	0.00941	0.01154
57.12	0.01328	0.01465	0.0095	0.01157
57.36	0.01307	0.01462	0.00986	0.0117
57.6	0.01321	0.01458	0.00937	0.01143
57.84	0.01334	0.01456	0.00938	0.0115
58.08	0.01317	0.01475	0.00945	0.01192
58.32	0.01321	0.01493	0.0096	0.01128
58.56	0.01321	0.0146	0.00979	0.0116
58.8	0.01327	0.0147	0.00923	0.01176
59.04	0.01311	0.01502	0.00957	0.01133
59.28	0.01287	0.01473	0.00975	0.0115
59.52	0.01325	0.01469	0.0096	0.01178
59.76	0.01305	0.01503	0.0094	0.01168
60	0.01367	0.01491	0.00951	0.01169
60.24	0.01279	0.01473	0.00912	0.01165
60.48	0.0133	0.01499	0.00966	0.01178
60.72	0.01353	0.01467	0.00931	0.01144
60.96	0.01334	0.01494	0.00955	0.01163
61.2	0.0132	0.0149	0.00941	0.01162
61.44	0.01324	0.01511	0.00941	0.01184
61.68	0.01315	0.01502	0.00959	0.01175
61.92	0.01312	0.01486	0.00939	0.01147
62.16	0.01327	0.01496	0.0095	0.01212
62.4	0.01339	0.01506	0.00979	0.01182
62.64	0.01348	0.01507	0.00954	0.01199
62.88	0.0131	0.01512	0.0099	0.01164
63.12	0.01319	0.01505	0.00933	0.01181
63.36	0.0132	0.01484	0.0095	0.01166
63.6	0.01369	0.0148	0.00971	0.01211
63.84	0.01328	0.01512	0.00974	0.01185
64.08	0.01344	0.01522	0.00957	0.01196
64.32	0.01349	0.0151	0.00967	0.01178
64.56	0.01361	0.01506	0.00977	0.01176
64.8	0.01372	0.01541	0.00966	0.0118
65.04	0.01358	0.01511	0.00973	0.01182
65.28	0.01364	0.01518	0.00958	0.01196
65.52	0.01395	0.01539	0.00975	0.01152
65.76	0.01359	0.01519	0.00963	0.01183
66	0.01345	0.01515	0.00963	0.01184
66.24	0.01355	0.01524	0.00988	0.01173
66.48	0.01358	0.01502	0.00991	0.01182
66.72	0.01414	0.01538	0.00979	0.01203
66.96	0.01355	0.01517	0.00962	0.01202
67.2	0.01358	0.01539	0.00966	0.01176
67.44	0.01356	0.01529	0.00974	0.01201
67.68	0.01359	0.01512	0.00968	0.01217
67.92	0.01371	0.01529	0.00965	0.01195
68.16	0.0139	0.01529	0.00997	0.01185
68.4	0.01392	0.01525	0.00971	0.01207
68.64	0.01425	0.01567	0.00964	0.01182
68.88	0.01442	0.01562	0.00976	0.01169
69.12	0.01352	0.01527	0.00965	0.01194
69.36	0.01382	0.01525	0.00975	0.01187
69.6	0.01411	0.01573	0.00975	0.01191
69.84	0.01404	0.0156	0.00988	0.01222
70.08	0.01355	0.01505	0.00975	0.01176
70.32	0.01419	0.0152	0.00991	0.01217
70.56	0.01398	0.01549	0.00981	0.01194
70.8	0.01397	0.01553	0.00985	0.01234
71.04	0.01409	0.01538	0.0099	0.01197
71.28	0.01344	0.01542	0.00983	0.01192
71.52	0.01388	0.01524	0.00978	0.01204
71.76	0.01392	0.01543	0.00963	0.01219
72	0.01373	0.01565	0.00976	0.01206
72.24	0.01408	0.01561	0.00985	0.01206
72.48	0.01322	0.01555	0.00968	0.01191
72.72	0.01426	0.01555	0.00977	0.01181
72.96	0.01427	0.01565	0.01002	0.01214
73.2	0.01392	0.0156	0.00987	0.0124
73.44	0.014	0.01572	0.00984	0.01189
73.68	0.01363	0.01561	0.0097	0.01209
73.92	0.0139	0.01545	0.00975	0.01215
74.16	0.01389	0.01555	0.00967	0.01205
74.4	0.01403	0.01531	0.01003	0.01215
74.64	0.01414	0.01544	0.00997	0.01222
74.88	0.01434	0.01568	0.0099	0.01216
75.12	0.01361	0.01556	0.0097	0.0121
75.36	0.01367	0.01544	0.00971	0.01215
75.6	0.01396	0.01574	0.00993	0.01186
75.84	0.01425	0.0154	0.00999	0.01184
76.08	0.01409	0.01547	0.00983	0.01184
76.32	0.01445	0.01529	0.00972	0.012
76.56	0.01406	0.01592	0.00982	0.01205
76.8	0.01429	0.01562	0.0098	0.01207
77.04	0.01411	0.01565	0.00994	0.01213
77.28	0.01434	0.0157	0.00982	0.01225
77.52	0.01407	0.01568	0.00998	0.01224
77.76	0.01386	0.01573	0.00988	0.01201
78	0.01454	0.01582	0.00984	0.01215
78.24	0.01419	0.01582	0.00999	0.0121
78.48	0.01428	0.01602	0.00976	0.01223
78.72	0.01433	0.01562	0.00972	0.01199
78.96	0.01403	0.01568	0.00981	0.01219
79.2	0.01423	0.01551	0.00982	0.01179
79.44	0.01436	0.01562	0.00981	0.01254
79.68	0.01426	0.01561	0.0099	0.01214
79.92	0.01428	0.01558	0.0099	0.01228
80.16	0.01392	0.01552	0.00997	0.01209
80.4	0.01418	0.01553	0.00975	0.01221
80.64	0.01412	0.01553	0.00993	0.01208
80.88	0.01419	0.01541	0.01006	0.01216
81.12	0.01477	0.0161	0.00976	0.01194
81.36	0.01442	0.01605	0.00968	0.01232
81.6	0.01436	0.01582	0.00968	0.01198
81.84	0.01436	0.01583	0.00995	0.01202
82.08	0.01427	0.0158	0.00953	0.01205
82.32	0.01446	0.01585	0.00987	0.01201
82.56	0.01466	0.01545	0.00989	0.01242
82.8	0.01424	0.01588	0.00977	0.01198
83.04	0.0142	0.01597	0.00994	0.01195
83.28	0.01433	0.01549	0.00986	0.01221
83.52	0.01458	0.01543	0.01007	0.01221
83.76	0.01436	0.01565	0.0098	0.01206
84	0.01477	0.01596	0.0101	0.01217
84.24	0.01434	0.01575	0.00996	0.01208
84.48	0.0146	0.01564	0.01032	0.01217
84.72	0.01453	0.01525	0.00986	0.01252
84.96	0.01432	0.01572	0.00981	0.01256
85.2	0.01451	0.01568	0.01012	0.01226
85.44	0.01441	0.0155	0.01004	0.01207
85.68	0.01448	0.01592	0.01001	0.01213
85.92	0.01428	0.01572	0.00964	0.01241
86.16	0.01454	0.01584	0.00974	0.01212
86.4	0.01471	0.01584	0.00966	0.01219
86.64	0.0142	0.01591	0.00961	0.01241
86.88	0.01441	0.01571	0.00987	0.0122
87.12	0.01423	0.01565	0.00985	0.01213
87.36	0.01445	0.01561	0.00993	0.01233
87.6	0.01463	0.01562	0.00991	0.01239
87.84	0.01474	0.01556	0.0098	0.01208
88.08	0.01443	0.01583	0.00983	0.01259
88.32	0.01434	0.01589	0.00964	0.01211
88.56	0.01471	0.016	0.0099	0.01223
88.8	0.01468	0.01608	0.00983	0.01212
89.04	0.01458	0.01625	0.00977	0.01225
89.28	0.01413	0.01552	0.00972	0.01215
89.52	0.01475	0.0159	0.00961	0.01202
89.76	0.01459	0.01539	0.00987	0.01235
90	0.01439	0.01595	0.00974	0.01258
90.24	0.01454	0.01561	0.00997	0.01231
90.48	0.01436	0.016	0.00977	0.01229
90.72	0.01463	0.01608	0.00995	0.01216
90.96	0.01458	0.01607	0.00971	0.01215
91.2	0.01433	0.01599	0.00982	0.01239
91.44	0.01412	0.01597	0.00988	0.01232
91.68	0.01485	0.01556	0.00973	0.01229
91.92	0.01446	0.01604	0.00962	0.01227
92.16	0.01423	0.01608	0.00972	0.01206
92.4	0.01419	0.0159	0.00969	0.01226
92.64	0.01477	0.01615	0.00991	0.01235
92.88	0.01477	0.01589	0.00967	0.01228
93.12	0.01455	0.01601	0.00984	0.01223
93.36	0.01491	0.01613	0.00966	0.01214
93.6	0.0147	0.01594	0.00982	0.01208
93.84	0.01478	0.01602	0.00972	0.0121
94.08	0.01421	0.01615	0.00964	0.01203
94.32	0.0145	0.01605	0.00994	0.01211
94.56	0.01467	0.01594	0.00935	0.01205
94.8	0.01456	0.01588	0.00996	0.01211
95.04	0.01451	0.01589	0.00999	0.01224
95.28	0.01422	0.01612	0.00964	0.0121
95.52	0.0149	0.01616	0.00967	0.01231
95.76	0.01436	0.01572	0.00988	0.01214
96	0.01486	0.01603	0.00966	0.01218
96.24	0.01476	0.01586	0.00966	0.01256
96.48	0.01467	0.01592	0.00977	0.01201
96.72	0.01475	0.01604	0.0098	0.01238
96.96	0.01453	0.01575	0.00956	0.01251
97.2	0.01433	0.01596	0.00965	0.01219
97.44	0.01467	0.01615	0.00961	0.01233
97.68	0.01466	0.01618	0.00986	0.01251
97.92	0.01458	0.016	0.00989	0.01224
98.16	0.01472	0.0161	0.00956	0.01209
98.4	0.01473	0.01622	0.00979	0.01237
98.64	0.01481	0.01619	0.00969	0.01245
98.88	0.01451	0.01587	0.0098	0.01245
99.12	0.01481	0.01635	0.00954	0.01245
99.36	0.01471	0.01619	0.00977	0.01241
99.6	0.01509	0.01593	0.00988	0.0122
99.84	0.01472	0.01594	0.00949	0.01197
100.08	0.01474	0.01611	0.00993	0.01224
100.32	0.01451	0.01639	0.00984	0.01244
100.56	0.01502	0.01618	0.00978	0.01243
100.8	0.01455	0.01631	0.0099	0.01236
101.04	0.01458	0.01613	0.00999	0.01217
101.28	0.01441	0.01611	0.00966	0.01212
101.52	0.0143	0.01595	0.00972	0.01219
101.76	0.01479	0.01636	0.0095	0.01225
102	0.01438	0.01618	0.00966	0.01208
102.24	0.01456	0.01615	0.00984	0.01234
102.48	0.015	0.01603	0.00969	0.01235
102.72	0.01499	0.01622	0.00961	0.01241
102.96	0.01478	0.01619	0.00977	0.01259
103.2	0.01476	0.0158	0.00971	0.01206
103.44	0.01491	0.01592	0.00971	0.01213
103.68	0.01489	0.01616	0.00964	0.01224
103.92	0.01492	0.01602	0.00989	0.01214
104.16	0.01486	0.01625	0.00971	0.01247
104.4	0.01501	0.01611	0.00961	0.01199
104.64	0.01472	0.01595	0.00938	0.01241
104.88	0.01498	0.01593	0.00968	0.01244
105.12	0.01504	0.01636	0.00972	0.01236
105.36	0.0147	0.0162	0.00963	0.01232
105.6	0.01531	0.01589	0.00975	0.01227
105.84	0.01479	0.01631	0.0095	0.01228
106.08	0.01486	0.01616	0.00959	0.01252
106.32	0.01473	0.0163	0.00963	0.01236
106.56	0.01462	0.01616	0.00962	0.01252
106.8	0.01538	0.01629	0.00943	0.01189
107.04	0.01492	0.01623	0.00939	0.01232
107.28	0.01464	0.01625	0.00959	0.01207
107.52	0.01498	0.01626	0.00963	0.01231
107.76	0.01469	0.01585	0.00975	0.01215
108	0.01516	0.01599	0.00974	0.01207
108.24	0.01479	0.01589	0.00972	0.01205
108.48	0.01458	0.01609	0.00977	0.01197
108.72	0.01464	0.01637	0.00942	0.01221
108.96	0.015	0.01615	0.00963	0.01219
109.2	0.01447	0.01575	0.00977	0.01251
109.44	0.01504	0.01607	0.00979	0.01221
109.68	0.01484	0.01616	0.00987	0.01219
109.92	0.01458	0.01617	0.00961	0.01281
110.16	0.01497	0.01641	0.00953	0.01257
110.4	0.01516	0.01597	0.00961	0.01251
110.64	0.01505	0.01617	0.00969	0.01258
110.88	0.01543	0.01593	0.0099	0.01236
111.12	0.01523	0.01628	0.0097	0.01236
111.36	0.01487	0.01626	0.00965	0.01235
111.6	0.01501	0.01604	0.00974	0.0123
111.84	0.0149	0.01616	0.00942	0.01207
112.08	0.01519	0.01605	0.00993	0.01264
112.32	0.01523	0.01611	0.00976	0.01245
112.56	0.01516	0.01603	0.00972	0.01237
112.8	0.01484	0.01618	0.00963	0.01241
113.04	0.015	0.01619	0.00963	0.01245
113.28	0.01503	0.01611	0.00983	0.01243
113.52	0.01498	0.01601	0.0096	0.01245
113.76	0.01515	0.01613	0.00981	0.01245
114	0.01494	0.01617	0.00918	0.01224
114.24	0.01536	0.01591	0.00964	0.01237
114.48	0.01498	0.01604	0.00944	0.01234
114.72	0.01501	0.01612	0.00971	0.01226
114.96	0.0149	0.01617	0.00943	0.0123
115.2	0.01508	0.01632	0.00946	0.01238
115.44	0.01529	0.01575	0.00968	0.01235
115.68	0.01528	0.01612	0.00963	0.01223
115.92	0.01483	0.01617	0.00986	0.01248
116.16	0.01527	0.01621	0.00976	0.01221
116.4	0.01532	0.01592	0.00971	0.01218
116.64	0.01515	0.01628	0.00966	0.01236
116.88	0.01511	0.0161	0.00969	0.01224
117.12	0.01516	0.01605	0.00942	0.01232
117.36	0.01506	0.01616	0.00972	0.01248
117.6	0.01533	0.01632	0.00937	0.01246
117.84	0.01528	0.01623	0.00962	0.01243
118.08	0.01532	0.01632	0.00941	0.01237
118.32	0.0149	0.01591	0.0095	0.01227
118.56	0.01513	0.01618	0.00967	0.01259
118.8	0.01543	0.01626	0.00936	0.0123
119.04	0.01489	0.01653	0.00976	0.01238
119.28	0.01518	0.01601	0.00961	0.01249
119.52	0.01517	0.0165	0.00944	0.01239
119.76	0.01504	0.01635	0.00949	0.01247
120	0.01526	0.0162	0.00936	0.01225
120.24	0.01519	0.01591	0.00954	0.01247
120.48	0.01582	0.01601	0.00946	0.01242
120.72	0.01464	0.01656	0.00929	0.01253
120.96	0.01498	0.01631	0.00974	0.01254
121.2	0.01568	0.01584	0.00959	0.01245
121.44	0.01513	0.01645	0.00958	0.01256
121.68	0.01559	0.01632	0.00945	0.01256
121.92	0.01532	0.0166	0.00938	0.01263
122.16	0.01503	0.0161	0.00952	0.01246
122.4	0.01511	0.01647	0.00959	0.01245
122.64	0.01564	0.01614	0.00948	0.01248
122.88	0.01495	0.01639	0.0095	0.01235
123.12	0.01496	0.01645	0.00955	0.01255
123.36	0.01517	0.01631	0.00953	0.01259
123.6	0.01515	0.01616	0.00939	0.01228
123.84	0.01515	0.0163	0.00977	0.01232
124.08	0.01508	0.01625	0.00963	0.01259
124.32	0.01495	0.01627	0.0094	0.01268
124.56	0.01548	0.01638	0.00966	0.01206
124.8	0.01539	0.01639	0.00967	0.01239
125.04	0.01515	0.0159	0.00951	0.01233
125.28	0.01528	0.01624	0.00944	0.01227
125.52	0.01486	0.01619	0.00947	0.01249
125.76	0.01557	0.01636	0.00974	0.01213
126	0.01533	0.0162	0.00937	0.01234
126.24	0.0155	0.01624	0.00945	0.01256
126.48	0.01571	0.01625	0.00932	0.01245
126.72	0.01531	0.01606	0.00965	0.01227
126.96	0.01553	0.01623	0.00975	0.0126
127.2	0.01521	0.01643	0.00943	0.01272
127.44	0.0153	0.01611	0.00927	0.01228
127.68	0.01554	0.01601	0.00926	0.01234
127.92	0.01511	0.01616	0.00947	0.01282
128.16	0.01526	0.01641	0.00939	0.01234
128.4	0.01555	0.01629	0.00953	0.01236
128.64	0.01566	0.01638	0.00914	0.01254
128.88	0.01536	0.01629	0.0094	0.01259
129.12	0.01563	0.01608	0.00924	0.01258
129.36	0.01523	0.0163	0.00943	0.01217
129.6	0.01556	0.01647	0.00936	0.01237
129.84	0.01533	0.01633	0.00942	0.01267
130.08	0.01518	0.01653	0.00933	0.01247
130.32	0.01564	0.01602	0.00939	0.01251
130.56	0.01557	0.01606	0.00958	0.01249
130.8	0.01549	0.01632	0.00944	0.01259
131.04	0.0157	0.01614	0.00936	0.01261
131.28	0.01511	0.01623	0.00935	0.01254
131.52	0.01512	0.01664	0.00961	0.01262
131.76	0.01557	0.01646	0.00935	0.01258
132	0.01575	0.01631	0.00958	0.01245
132.24	0.01535	0.01632	0.00954	0.0125
132.48	0.01514	0.01649	0.00927	0.01246
132.72	0.01539	0.01617	0.00947	0.01237
132.96	0.01568	0.01628	0.00943	0.01238
133.2	0.01515	0.01621	0.00937	0.01241
133.44	0.01513	0.01621	0.00935	0.01222
133.68	0.01546	0.01623	0.00938	0.01235
133.92	0.0155	0.016	0.00958	0.01224
134.16	0.01586	0.01625	0.00918	0.01266
134.4	0.01546	0.0165	0.00951	0.01218
134.64	0.01526	0.01619	0.00945	0.01255
134.88	0.01579	0.01641	0.0095	0.01241
135.12	0.0156	0.01639	0.00965	0.0124
135.36	0.01552	0.01622	0.00944	0.01265
135.6	0.01558	0.01619	0.0093	0.01219
135.84	0.01557	0.016	0.0093	0.01242
136.08	0.01535	0.01624	0.00965	0.01247
136.32	0.01536	0.01619	0.00924	0.01232
136.56	0.01565	0.01598	0.00945	0.01261
136.8	0.01556	0.01635	0.00944	0.01246
137.04	0.01599	0.01649	0.00932	0.01262
137.28	0.01553	0.0164	0.00928	0.01268
137.52	0.0149	0.01632	0.00931	0.01252
137.76	0.01523	0.01617	0.00916	0.01243
138	0.0159	0.01618	0.00973	0.01235
138.24	0.01521	0.01599	0.00935	0.01214
138.48	0.01561	0.01622	0.00983	0.01239
138.72	0.01558	0.01631	0.00971	0.01247
138.96	0.01562	0.0163	0.0093	0.01253
139.2	0.01533	0.01619	0.00939	0.01223
139.44	0.01552	0.01629	0.00932	0.01266
139.68	0.01577	0.01635	0.00937	0.01252
139.92	0.01552	0.01626	0.0094	0.0122
140.16	0.01557	0.01636	0.00936	0.01228
140.4	0.01546	0.01657	0.00949	0.01226
140.64	0.01587	0.01614	0.00925	0.01232
140.88	0.01541	0.01641	0.00957	0.01241
141.12	0.01565	0.01657	0.00919	0.01211
141.36	0.01546	0.01604	0.00926	0.01258
141.6	0.01552	0.01611	0.00914	0.01292
141.84	0.01583	0.01644	0.0093	0.01255
142.08	0.01541	0.01633	0.00914	0.01226
142.32	0.01571	0.01652	0.00935	0.01234
142.56	0.01589	0.01607	0.00898	0.0124
142.8	0.01523	0.01658	0.00936	0.01231
143.04	0.01561	0.01632	0.00928	0.01239
143.28	0.01574	0.01626	0.00921	0.01219
143.52	0.0157	0.01619	0.00946	0.01262
143.76	0.01518	0.01655	0.00942	0.01238
144	0.01571	0.01617	0.00932	0.01234
144.24	0.01558	0.01662	0.00942	0.01249
144.48	0.01557	0.01625	0.00924	0.01272
144.72	0.01535	0.01606	0.00938	0.01243
144.96	0.01508	0.0165	0.00939	0.01254
145.2	0.01539	0.01634	0.00934	0.01278
145.44	0.01559	0.01673	0.00939	0.01224
145.68	0.01551	0.01633	0.00901	0.01254
145.92	0.01558	0.01644	0.00928	0.01241
146.16	0.01565	0.01634	0.00959	0.01251
146.4	0.0152	0.01658	0.00948	0.01252
146.64	0.01608	0.01597	0.00927	0.01242
146.88	0.0156	0.0164	0.00904	0.01232
147.12	0.01559	0.01637	0.00912	0.01237
147.36	0.0158	0.01617	0.00929	0.0125
147.6	0.01586	0.01634	0.00921	0.01257
147.84	0.01546	0.0162	0.00933	0.01228
148.08	0.01581	0.01625	0.00939	0.01233
148.32	0.01561	0.0164	0.00921	0.01239
148.56	0.0154	0.01643	0.00925	0.0127
148.8	0.01568	0.01599	0.00945	0.01263
149.04	0.01534	0.0165	0.00918	0.01232
149.28	0.0157	0.01625	0.00918	0.01241
149.52	0.01576	0.01657	0.00899	0.01249
149.76	0.01567	0.01623	0.00924	0.01248
150	0.01562	0.01677	0.00942	0.01265
150.24	0.0159	0.01659	0.00949	0.0128
150.48	0.01614	0.01686	0.00981	0.01323
150.72	0.00386	0.00369	-0.00105	0.00088
150.96	-0.04796	-0.05189	-0.04715	-0.04998
151.2	0.04259	0.04416	0.03118	0.0371
151.44	-0.00491	-0.00622	-0.00615	-0.00781
151.68	0.01708	0.01804	0.0145	0.0146
151.92	0.01795	0.01834	0.01021	0.01454
152.16	0.01797	0.01842	0.0103	0.01444
152.4	0.01772	0.01849	0.01064	0.01465
152.64	0.01843	0.01874	0.01089	0.01465
152.88	0.01842	0.01908	0.01078	0.01493
153.12	0.01844	0.01915	0.01111	0.0148
153.36	0.01843	0.0195	0.01111	0.01493
153.6	0.01855	0.01935	0.01121	0.01496
153.84	0.01871	0.01957	0.01128	0.01514
154.08	0.01897	0.01941	0.01138	0.01524
154.32	0.01885	0.01978	0.01131	0.01552
154.56	0.01951	0.0194	0.01133	0.01525
154.8	0.01949	0.01985	0.01132	0.01581
155.04	0.01906	0.0196	0.01141	0.01577
155.28	0.01995	0.02022	0.01168	0.01558
155.52	0.01971	0.02018	0.0114	0.01588
155.76	0.01956	0.02054	0.01163	0.01563
156	0.01965	0.0204	0.01185	0.01556
156.24	0.01959	0.02023	0.01174	0.01566
156.48	0.01964	0.02035	0.01163	0.0157
156.72	0.02021	0.0207	0.01187	0.01612
156.96	0.01989	0.02074	0.0118	0.01563
157.2	0.01989	0.02073	0.01176	0.01579
157.44	0.01987	0.02088	0.01175	0.01584
157.68	0.02014	0.02092	0.01172	0.01598
157.92	0.0199	0.0208	0.01222	0.01602
158.16	0.02012	0.02064	0.01159	0.01597
158.4	0.02074	0.02101	0.01221	0.01621
158.64	0.02017	0.02083	0.01243	0.0161
158.88	0.02048	0.02134	0.01214	0.01611
159.12	0.02025	0.02121	0.01185	0.01623
159.36	0.02065	0.02105	0.01199	0.01561
159.6	0.02067	0.02083	0.01214	0.01631
159.84	0.02083	0.02097	0.01226	0.01641
160.08	0.02035	0.02129	0.01196	0.01646
160.32	0.02092	0.02138	0.01199	0.01637
160.56	0.0206	0.02132	0.01226	0.01611
160.8	0.02044	0.02096	0.0124	0.01638
161.04	0.02073	0.021	0.0123	0.01626
161.28	0.0205	0.02119	0.01241	0.01623
161.52	0.02083	0.0215	0.01243	0.01626
161.76	0.02061	0.02139	0.01257	0.01621
162	0.02082	0.0212	0.01238	0.01631
162.24	0.02093	0.02168	0.01238	0.01628
162.48	0.02076	0.02155	0.01228	0.01642
162.72	0.02125	0.02166	0.0125	0.01634
162.96	0.02119	0.02162	0.01254	0.01659
163.2	0.02072	0.02113	0.01237	0.01641
163.44	0.02091	0.02147	0.01266	0.01645
163.68	0.02116	0.02158	0.0125	0.0165
163.92	0.0215	0.02168	0.01262	0.0164
164.16	0.02109	0.02161	0.01262	0.01628
164.4	0.02109	0.02191	0.01248	0.01656
164.64	0.02135	0.0215	0.01235	0.01646
164.88	0.02141	0.02154	0.01256	0.01628
165.12	0.02113	0.0217	0.01255	0.0167
165.36	0.02075	0.02165	0.01278	0.01657
165.6	0.02156	0.02199	0.01236	0.01645
165.84	0.02126	0.02181	0.01235	0.0166
166.08	0.02098	0.02168	0.01255	0.01652
166.32	0.02131	0.02184	0.01256	0.01664
166.56	0.02104	0.02165	0.01246	0.01644
166.8	0.02139	0.02172	0.01262	0.01648
167.04	0.02148	0.02164	0.01239	0.017
167.28	0.02135	0.02187	0.01279	0.01666
167.52	0.02103	0.02171	0.01275	0.01641
167.76	0.02121	0.02219	0.01265	0.0168
168	0.02143	0.02162	0.01279	0.01667
168.24	0.02115	0.02207	0.01234	0.01674
168.48	0.02119	0.0219	0.01273	0.01665
168.72	0.02085	0.0217	0.01254	0.01657
168.96	0.02086	0.02193	0.01242	0.01641
169.2	0.02123	0.02152	0.01245	0.01674
169.44	0.02081	0.02192	0.01279	0.01662
169.68	0.02152	0.02181	0.01265	0.01695
169.92	0.02133	0.02168	0.01266	0.01665
170.16	0.02125	0.02233	0.01274	0.01674
170.4	0.0214	0.02211	0.01296	0.01651
170.64	0.0214	0.02194	0.01255	0.01674
170.88	0.02117	0.02217	0.01286	0.01668
171.12	0.02147	0.02186	0.01254	0.0166
171.36	0.02143	0.02185	0.01268	0.01695
171.6	0.02129	0.0218	0.01261	0.01657
171.84	0.02167	0.02201	0.01273	0.01672
172.08	0.02145	0.02221	0.01269	0.01691
172.32	0.02161	0.02179	0.01262	0.01677
172.56	0.02113	0.02216	0.01269	0.01666
172.8	0.02117	0.02213	0.01255	0.01665
173.04	0.02125	0.02171	0.01264	0.01672
173.28	0.02104	0.02193	0.01264	0.01651
173.52	0.02151	0.02189	0.01244	0.01669
173.76	0.02163	0.0219	0.01243	0.01677
174	0.02191	0.02209	0.01245	0.01674
174.24	0.02113	0.02193	0.01279	0.01666
174.48	0.02141	0.02202	0.01267	0.01683
174.72	0.02152	0.02165	0.01269	0.01657
174.96	0.02153	0.02211	0.01254	0.01675
175.2	0.02186	0.02212	0.01263	0.01677
175.44	0.02181	0.02221	0.0127	0.01674
175.68	0.0219	0.022	0.01281	0.01653
175.92	0.02134	0.02205	0.01272	0.01661
176.16	0.02157	0.02171	0.01255	0.01694
176.4	0.02156	0.022	0.01279	0.01693
176.64	0.02151	0.02192	0.0127	0.01669
176.88	0.02138	0.02189	0.01289	0.01685
177.12	0.02169	0.02212	0.01271	0.01698
177.36	0.02156	0.02257	0.01269	0.01675
177.6	0.0215	0.02237	0.01253	0.01647
177.84	0.02166	0.02236	0.01244	0.0166
178.08	0.02178	0.02215	0.01239	0.01692
178.32	0.02166	0.0222	0.01261	0.01666
178.56	0.02184	0.02191	0.01268	0.01682
178.8	0.02137	0.02187	0.01247	0.01694
179.04	0.02152	0.02222	0.01269	0.01665
179.28	0.02134	0.02237	0.01266	0.01656
179.52	0.02204	0.02178	0.0128	0.0168
179.76	0.02163	0.02214	0.01297	0.01692
180	0.02145	0.02195	0.01267	0.01654
180.24	0.02182	0.02236	0.01275	0.01685
180.48	0.02166	0.02212	0.01283	0.01675
180.72	0.02136	0.02213	0.01289	0.01687
180.96	0.02145	0.0218	0.01256	0.01678
181.2	0.0214	0.02209	0.01293	0.01674
181.44	0.02196	0.02224	0.0126	0.01673
181.68	0.02182	0.02187	0.01257	0.01671
181.92	0.02171	0.02194	0.01269	0.01699
182.16	0.02152	0.022	0.01269	0.01684
182.4	0.02127	0.02203	0.01276	0.01682
182.64	0.02176	0.02193	0.01289	0.01698
182.88	0.0218	0.02207	0.01281	0.01691
183.12	0.02114	0.022	0.01264	0.01667
183.36	0.02186	0.02208	0.0127	0.01704
183.6	0.02184	0.02226	0.01282	0.01638
183.84	0.02174	0.02194	0.01245	0.01703
184.08	0.02161	0.02197	0.0126	0.01675
184.32	0.02195	0.02225	0.0126	0.01673
184.56	0.02177	0.0222	0.01266	0.01686
184.8	0.0217	0.0223	0.0126	0.01691
185.04	0.02176	0.02216	0.01278	0.01675
185.28	0.02146	0.02227	0.01272	0.01694
185.52	0.02122	0.02217	0.01262	0.01668
185.76	0.02115	0.0223	0.01282	0.01687
186	0.02194	0.02204	0.01295	0.01692
186.24	0.02165	0.02171	0.01252	0.0164
186.48	0.02162	0.0219	0.01285	0.01702
186.72	0.02174	0.02222	0.01263	0.01674
186.96	0.02201	0.02193	0.01288	0.01679
187.2	0.02168	0.02204	0.0127	0.01717
187.44	0.02152	0.02252	0.01246	0.01686
187.68	0.02131	0.02228	0.01287	0.0168
187.92	0.02173	0.022	0.01284	0.01682
188.16	0.02165	0.02203	0.01272	0.0168
188.4	0.02178	0.02209	0.01259	0.01647
188.64	0.0214	0.02212	0.01259	0.01653
188.88	0.02161	0.02209	0.01321	0.01686
189.12	0.0217	0.02196	0.01254	0.01686
189.36	0.02157	0.0225	0.01272	0.01674
189.6	0.02174	0.02244	0.01255	0.01688
189.84	0.02169	0.02211	0.01261	0.0169
190.08	0.02225	0.02235	0.01265	0.01675
190.32	0.02164	0.0223	0.013	0.01703
190.56	0.02147	0.02233	0.01272	0.0168
190.8	0.02168	0.02228	0.01279	0.01654
191.04	0.02174	0.02225	0.0127	0.01682
191.28	0.02193	0.0222	0.01291	0.01687
191.52	0.02128	0.02187	0.01249	0.01693
191.76	0.02106	0.02196	0.01289	0.01682
192	0.02165	0.02206	0.01265	0.01676
192.24	0.02147	0.02212	0.0125	0.0168
192.48	0.02232	0.02231	0.01266	0.01678
192.72	0.02148	0.02187	0.01286	0.01681
192.96	0.02177	0.02205	0.01268	0.01668
193.2	0.02131	0.02184	0.01253	0.01695
193.44	0.02193	0.02206	0.01276	0.01671
193.68	0.02151	0.02244	0.01263	0.01656
193.92	0.02164	0.02213	0.01272	0.01695
194.16	0.022	0.02241	0.01265	0.01662
194.4	0.02144	0.02217	0.01286	0.01669
194.64	0.02183	0.02236	0.01249	0.01687
194.88	0.02173	0.02223	0.01265	0.01677
195.12	0.02159	0.02235	0.01259	0.01656
195.36	0.02147	0.0224	0.01278	0.01667
195.6	0.02131	0.02229	0.0127	0.01675
195.84	0.02157	0.02207	0.01247	0.01696
196.08	0.02179	0.02214	0.01254	0.01677
196.32	0.02167	0.02229	0.01265	0.01677
196.56	0.02163	0.02198	0.01292	0.01677
196.8	0.02209	0.02259	0.01271	0.01681
197.04	0.02147	0.02244	0.01263	0.01638
197.28	0.02149	0.02232	0.01259	0.0169
197.52	0.02184	0.02183	0.01284	0.01695
197.76	0.02149	0.02215	0.01249	0.01688
198	0.02141	0.02184	0.01277	0.0169
198.24	0.02177	0.02197	0.01276	0.01655
198.48	0.02158	0.0219	0.01251	0.01703
198.72	0.022	0.02224	0.01264	0.0166
198.96	0.02158	0.02236	0.01244	0.01677
199.2	0.02147	0.02184	0.01285	0.01693
199.44	0.02159	0.0221	0.01249	0.01694
199.68	0.02165	0.02221	0.0126	0.01685
199.92	0.02146	0.02193	0.01258	0.01673
200.16	0.02212	0.02215	0.01258	0.0169
200.4	0.02138	0.02263	0.01258	0.01651
200.64	0.02162	0.02239	0.01271	0.0167
200.88	0.02179	0.02212	0.01247	0.01664
201.12	0.02195	0.02191	0.01248	0.01663
201.36	0.02175	0.02198	0.01259	0.01669
201.6	0.02169	0.02189	0.01278	0.01677
201.84	0.02175	0.02203	0.01258	0.0168
202.08	0.02146	0.02219	0.01258	0.01694
202.32	0.02152	0.02222	0.01244	0.01638
202.56	0.0214	0.02172	0.01269	0.01685
202.8	0.02173	0.02195	0.01248	0.01688
203.04	0.02095	0.02195	0.01293	0.01682
203.28	0.02181	0.02211	0.01245	0.01662
203.52	0.02176	0.02173	0.01248	0.01701
203.76	0.02154	0.02192	0.01237	0.0167
204	0.02128	0.02199	0.01248	0.01691
204.24	0.02164	0.02204	0.01269	0.01667
204.48	0.02099	0.02246	0.01302	0.01693
204.72	0.02166	0.02185	0.0126	0.01671
204.96	0.02179	0.02182	0.01253	0.01672
205.2	0.02136	0.02171	0.01247	0.01662
205.44	0.02136	0.02184	0.01265	0.01682
205.68	0.02097	0.02203	0.01259	0.01678
205.92	0.02155	0.02175	0.01271	0.01662
206.16	0.02125	0.02193	0.01243	0.01652
206.4	0.02117	0.02175	0.01272	0.01687
206.64	0.02111	0.02221	0.0125	0.01692
206.88	0.02166	0.02163	0.01237	0.01678
207.12	0.02107	0.02212	0.01256	0.0166
207.36	0.02125	0.02177	0.01229	0.01674
207.6	0.02154	0.02192	0.0128	0.01689
207.84	0.0215	0.02192	0.01231	0.01679
208.08	0.02105	0.02176	0.01249	0.01673
208.32	0.02156	0.02209	0.01242	0.01663
208.56	0.02148	0.02192	0.0128	0.01672
208.8	0.02131	0.02184	0.01258	0.01674
209.04	0.02143	0.02185	0.01261	0.0168
209.28	0.0212	0.02196	0.01269	0.01667
209.52	0.02148	0.02212	0.01247	0.01657
209.76	0.02227	0.02189	0.01243	0.01671
210	0.02171	0.02192	0.01272	0.01684
210.24	0.02155	0.02205	0.0126	0.0167
210.48	0.0213	0.02192	0.01246	0.01683
210.72	0.02163	0.02178	0.01225	0.01675
210.96	0.02166	0.02197	0.01271	0.01647
211.2	0.02168	0.0219	0.01237	0.01676
211.44	0.02117	0.02206	0.01259	0.01688
211.68	0.02177	0.02181	0.01234	0.01663
211.92	0.02139	0.02196	0.01227	0.01633
212.16	0.02187	0.02165	0.01253	0.01655
212.4	0.02152	0.02181	0.01285	0.01684
212.64	0.02152	0.02166	0.01248	0.0164
212.88	0.02136	0.02188	0.0126	0.01673
213.12	0.02133	0.02203	0.01241	0.01651
213.36	0.02163	0.02187	0.01265	0.01677
213.6	0.02152	0.02201	0.01234	0.01656
213.84	0.0212	0.02181	0.01266	0.01677
214.08	0.02083	0.02176	0.01265	0.01684
214.32	0.02155	0.02207	0.01253	0.01655
214.56	0.02137	0.0218	0.01238	0.0167
214.8	0.02179	0.02182	0.01244	0.01635
215.04	0.02115	0.02185	0.01238	0.01668
215.28	0.02156	0.0215	0.0122	0.01628
215.52	0.02132	0.02209	0.01249	0.01631
215.76	0.02145	0.02172	0.0125	0.01668
216	0.02114	0.02176	0.01226	0.01674
216.24	0.02131	0.02182	0.01243	0.01669
216.48	0.02188	0.02166	0.01227	0.01649
216.72	0.02172	0.02167	0.01244	0.01659
216.96	0.02159	0.02159	0.01236	0.01663
217.2	0.02091	0.02167	0.01245	0.01657
217.44	0.02174	0.02229	0.01238	0.01656
217.68	0.0216	0.02164	0.01244	0.01665
217.92	0.02081	0.02169	0.01252	0.0166
218.16	0.02131	0.02186	0.01247	0.01668
218.4	0.02123	0.02155	0.01235	0.01667
218.64	0.02168	0.02145	0.01246	0.01662
218.88	0.02155	0.02173	0.01237	0.01649
219.12	0.02157	0.02191	0.0123	0.01655
219.36	0.02072	0.02133	0.01232	0.01646
219.6	0.02142	0.0217	0.01255	0.01652
219.84	0.02152	0.02187	0.0122	0.01641
220.08	0.02143	0.02165	0.01219	0.01669
220.32	0.02119	0.02151	0.01253	0.01653
220.56	0.02139	0.02188	0.01239	0.01662
220.8	0.02124	0.0219	0.01219	0.01649
221.04	0.02102	0.02182	0.01236	0.0166
221.28	0.02094	0.02161	0.01261	0.01636
221.52	0.02134	0.02136	0.01232	0.01651
221.76	0.0213	0.02194	0.01226	0.01652
222	0.02142	0.02164	0.01233	0.01645
222.24	0.02102	0.02162	0.01205	0.01658
222.48	0.02113	0.02163	0.01226	0.01646
222.72	0.0217	0.02155	0.01235	0.01641
222.96	0.02147	0.02177	0.01245	0.01659
223.2	0.02157	0.02178	0.01247	0.01641
223.44	0.02111	0.02185	0.01211	0.01678
223.68	0.02108	0.02169	0.01227	0.01622
223.92	0.02132	0.02178	0.01259	0.01643
224.16	0.02097	0.02155	0.01246	0.01647
224.4	0.02149	0.02176	0.01236	0.01674
224.64	0.02046	0.02156	0.01235	0.01671
224.88	0.02172	0.02153	0.01234	0.01653
225.12	0.02139	0.02168	0.0121	0.01658
225.36	0.02093	0.02182	0.01196	0.01683
225.6	0.02104	0.02163	0.01248	0.01649
225.84	0.02036	0.02138	0.01212	0.01654
226.08	0.02131	0.02172	0.01229	0.01671
226.32	0.02125	0.02178	0.01228	0.0164
226.56	0.02122	0.02165	0.01258	0.01643
226.8	0.02111	0.02137	0.01249	0.01641
227.04	0.02162	0.02176	0.01219	0.01629
227.28	0.02139	0.02184	0.01218	0.01624
227.52	0.02111	0.02168	0.01212	0.01649
227.76	0.02129	0.02148	0.01236	0.01643
228	0.02126	0.02164	0.0123	0.0165
228.24	0.02126	0.02153	0.01227	0.01636
228.48	0.02145	0.02151	0.01234	0.0167
228.72	0.02128	0.0216	0.01211	0.01647
228.96	0.02126	0.02145	0.01207	0.01625
229.2	0.02105	0.02167	0.01225	0.01652
229.44	0.02134	0.02157	0.01204	0.0165
229.68	0.02075	0.02134	0.01216	0.01634
229.92	0.021	0.02149	0.01221	0.01645
230.16	0.02111	0.02155	0.01242	0.01653
230.4	0.02147	0.02155	0.01204	0.01663
230.64	0.02113	0.02146	0.01219	0.0163
230.88	0.02159	0.02192	0.01205	0.01642
231.12	0.02121	0.02152	0.01201	0.0164
231.36	0.02116	0.02168	0.01225	0.01656
231.6	0.02151	0.02136	0.01228	0.01612
231.84	0.02106	0.0216	0.01221	0.01623
232.08	0.02124	0.02155	0.01207	0.0165
232.32	0.02101	0.02139	0.01223	0.01627
232.56	0.02099	0.02181	0.01202	0.01607
232.8	0.0211	0.02142	0.01235	0.01621
233.04	0.02101	0.02146	0.01199	0.01615
233.28	0.02077	0.0215	0.01226	0.01625
233.52	0.02105	0.02154	0.01213	0.01614
233.76	0.02098	0.02133	0.012	0.01627
234	0.02161	0.02169	0.01227	0.01613
234.24	0.02165	0.0216	0.01226	0.01618
234.48	0.02091	0.02146	0.01173	0.01618
234.72	0.02083	0.0216	0.01227	0.01642
234.96	0.02126	0.02154	0.01224	0.01651
235.2	0.02126	0.02129	0.01226	0.01637
235.44	0.02142	0.02155	0.01222	0.0166
235.68	0.02068	0.02114	0.01219	0.01654
235.92	0.02113	0.02142	0.01208	0.01615
236.16	0.02121	0.02136	0.01217	0.01619
236.4	0.02119	0.0215	0.01212	0.01614
236.64	0.02083	0.02144	0.01214	0.01623
236.88	0.0214	0.02134	0.01179	0.01647
237.12	0.0212	0.0213	0.01208	0.01627
237.36	0.02076	0.02136	0.01203	0.01583
237.6	0.02129	0.02145	0.01224	0.01606
237.84	0.02061	0.02131	0.01235	0.01607
238.08	0.02101	0.02155	0.01202	0.01623
238.32	0.02115	0.02123	0.01186	0.01609
238.56	0.02072	0.02156	0.01214	0.0163
238.8	0.0209	0.02139	0.01202	0.01616
239.04	0.02135	0.02105	0.01198	0.01649
239.28	0.02098	0.02117	0.01196	0.01648
239.52	0.02081	0.02161	0.01202	0.01599
239.76	0.02095	0.02141	0.01235	0.01653

## Sheet: Ric8A
Time	Exp1	Exp2	Exp3
0	0.000435928	0.000168
0.24	0.000326629	4.92e-05	-0.000248389
0.48	0.000170995	0.000229	0.000339998
0.72	0.000172166	4.53e-05	6.69942e-05
0.96	0.000226045	2.3e-05	0.000425731
1.2	9.84274e-05	0.000433	0.000151472
1.44	0.000146519	0.000418	0.000617362
1.68	0.000101548	8.61e-05	-0.000496349
1.92	7.11789e-05	-0.00022	-2.60133e-05
2.16	0.000367949	0.000565	-0.000154689
2.4	0.000259837	6.83e-05	0.000195568
2.64	-0.000132818	0.000159	0.000245803
2.88	-1.75822e-05	0.000277	0.000215143
3.12	-0.000139636	5.29e-05	3.25249e-05
3.36	0.000269468	0.000164	-6.14624e-05
3.6	-2.82219e-05	-0.00044	0.000167407
3.84	6.4615e-05	0.000105	0.00032903
4.08	0.000344753	0.000204	0.000527802
4.32	0.000273093	0.000402	-2.35888e-05
4.56	-4.35056e-06	-0.00017	0.000582033
4.8	0.000429279	-9.8e-05	0.000285063
5.04	-0.000154336	1.36e-05	0.000307181
5.28	0.000143227	-0.00014	-1.90427e-06
5.52	1.8496e-05	-0.00021	0.000401536
5.76	-7.85931e-05	0.000393	3.49013e-05
6	-0.000173439	-0.00051	0.000328062
6.24	0.000176276	-0.0003	-0.000140135
6.48	0.000194087	-0.00017	0.000341933
6.72	0.000366098	-9.1e-05	-0.000240921
6.96	0.000127884	-0.00043	1.41946e-05
7.2	0.000110708	0.000285	0.000333049
7.44	7.8008e-05	0.000359	-1.16718e-05
7.68	8.94478e-05	-0.00022	5.94403e-05
7.92	-3.84555e-05	-0.00033	6.31203e-05
8.16	0.000290998	0.000254	0.000324562
8.4	-3.296e-05	2.93e-05	-0.000294057
8.64	0.000372571	5.26e-06	-4.23975e-05
8.88	-0.000125408	-5.3e-05	0.000268127
9.12	5.53745e-05	7.85e-05	0.00012695
9.36	-0.000206332	7.95e-05	-0.000366359
9.6	-0.000109399	0.000297	0.000205468
9.84	0.000105681	0.000139	-0.000293793
10.08	2.87171e-05	0.00011	0.00041807
10.32	0.000160376	0.000166	0.000165042
10.56	-0.000155316	0.000317	-3.27408e-05
10.8	0.00039898	0.000584	5.31963e-05
11.04	0.000223832	-1.4e-05	-0.000133628
11.28	0.000286417	0.000148	-0.000174177
11.52	0.000184445	0.000219	1.023e-05
11.76	-0.000108945	-0.0001	1.51533e-05
12	-1.1071e-06	0.000184	-3.63985e-05
12.24	-5.92203e-05	7.87e-05	0.000174896
12.48	4.21631e-05	-7.6e-05	-0.000132303
12.72	-5.23483e-05	-0.00011	0.000167497
12.96	-0.000174141	0.000277	-0.000142447
13.2	-0.000117102	-9.8e-06	-0.000423178
13.44	9.39887e-05	0.000291	0.000141699
13.68	-1.69968e-05	3.7e-05	0.000140469
13.92	3.28284e-05	0.000503	-0.000177815
14.16	2.8578e-05	-0.0002	0.000114667
14.4	2.81192e-05	-0.00023	1.25482e-05
14.64	-7.3795e-05	0.0001	4.69689e-05
14.88	-6.60032e-05	7.45e-05	8.88078e-05
15.12	3.50437e-05	0.000209	0.000294336
15.36	-0.000123496	-9.7e-05	-0.00014858
15.6	-9.80035e-05	8.64e-05	2.71724e-05
15.84	-0.000206444	0.000292	9.74148e-05
16.08	5.82782e-06	-0.00021	0.000285855
16.32	0.000224035	-1.5e-05	0.000124474
16.56	-0.000296869	0.000189	0.000374242
16.8	-0.00013209	-0.00014	-0.000184332
17.04	0.000113393	-0.00062	-0.000138801
17.28	-6.46018e-05	-0.00018	1.9877e-05
17.52	-6.31392e-05	-0.00012	-0.000326131
17.76	4.75551e-06	-0.00019	-0.000227237
18	-0.00014559	0.000182	-0.000381628
18.24	-8.02251e-05	-0.00026	-0.000258733
18.48	0.000161102	-0.00021	-0.000399671
18.72	-0.000203073	7.99e-05	0.000117084
18.96	-3.55699e-05	0.000153	8.13382e-05
19.2	0.000205645	-0.00028	0.000203279
19.44	0.000124007	-1.9e-05	-0.000118314
19.68	-8.58045e-05	-0.00029	9.11795e-05
19.92	-0.00014937	6.65e-05	-0.000291754
20.16	-0.00020445	5.73e-05	0.000205813
20.4	0.000134605	-0.0003	0.000140473
20.64	-6.06696e-05	-0.00017	-0.000157742
20.88	-0.000431221	0.000259	8.01409e-05
21.12	-0.000201354	-0.0003	5.91872e-05
21.36	-0.00030691	-7.3e-05	0.000172504
21.6	-2.30641e-05	-8.6e-05	-0.000421361
21.84	-4.42702e-05	-0.0001	-0.000241085
22.08	-0.00022753	1.46e-06	-0.00035258
22.32	4.88217e-05	0.000131	-0.000163922
22.56	-8.69611e-05	-7.9e-05	-8.76016e-05
22.8	-2.56645e-06	-0.00047	0.000210859
23.04	-0.000168563	-0.00012	-0.000203141
23.28	-9.1736e-05	7.9e-05	1.33257e-05
23.52	-5.68489e-05	-7.2e-05	9.72783e-05
23.76	-0.000324914	0.000217	-0.0003524
24	0.000213436	0.000102	-0.000127274
24.24	3.71627e-05	7.35e-05	1.21536e-05
24.48	5.44327e-05	0.000351	0.000401129
24.72	-0.000297202	7.64e-05	0.000293512
24.96	-0.000194223	-0.00025	-0.000233363
25.2	0.000226795	-6.2e-05	-0.00020012
25.44	-0.000176974	-0.00017	-0.000149281
25.68	-0.000250126	5.96e-05	-0.000303545
25.92	-0.000182667	9.21e-05	-0.000238418
26.16	-1.73263e-05	5.81e-05	-0.000213907
26.4	-0.000242437	-0.00019	-5.57496e-05
26.64	-0.000280023	-0.00039	-0.000100308
26.88	0.000104177	0.000194	-7.07839e-05
27.12	-0.000146258	-4.2e-05	-0.000208475
27.36	-5.77055e-05	-0.00012	-0.000196882
27.6	-0.0002231	-0.00012	0.000181289
27.84	1.88101e-05	-4.1e-05	-0.000251286
28.08	-0.000186309	-0.00023	-0.000481887
28.32	-0.000256716	-0.00047	0.000281315
28.56	-3.97481e-05	-0.00031	-0.000549932
28.8	0.000100345	-0.0002	0.000283936
29.04	0.000181981	0.000132	-0.000135527
29.28	-0.000244111	-3.4e-05	-0.000535044
29.52	-0.000358232	-0.00022	0.000193687
29.76	-0.000255109	-0.00024	-0.000146531
30	-0.000128826	0.000293	-0.000574809
30.24	0.000255473	0.000138	-0.000152285
30.48	-0.000202891	-0.00014	0.000368388
30.72	-0.00967754	-0.01051	9.19547e-05
30.96
31.2	-0.0567701	-0.0561	0.0451857
31.44	0.136292	0.117791	-0.0568309
31.68
31.92
32.16	8.32069e-06	-0.00026	0.000162988
32.4	-2.10218e-06	-6.3e-05	3.2062e-05
32.64	-0.000483472	-6.6e-05	8.32143e-05
32.88	-0.000469846	-0.00044	-2.10163e-07
33.12	-6.23334e-05	-1.2e-06	-0.000327211
33.36	-0.000262267	-0.00021	-0.000112429
33.6	-0.00022251	-0.00037	-7.7617e-06
33.84	-0.000223279	1.61e-05	-5.53593e-05
34.08	-0.000171313	-0.00048	-0.000112491
34.32	-8.80652e-05	0.000137	0.000131809
34.56	-0.000258531	-0.0004	3.83022e-05
34.8	-0.000376203	0.00011	-0.000231892
35.04	-0.00019275	0.000286	0.000115583
35.28	-0.000694156	-0.00057	0.000282751
35.52	-0.000239922	0.000126	6.69666e-05
35.76	-0.00013224	-0.00051	-0.000120493
36	-0.000407689	-2.4e-05	-0.00023023
36.24	-0.000435961	-0.00043	-0.000449611
36.48	-0.000170658	7.17e-05	7.0705e-05
36.72	-0.000274798	-3.5e-05	4.50416e-06
36.96	-0.000390476	-0.00014	-0.00032106
37.2	-0.000399258	8.78e-05	4.32386e-05
37.44	-0.000419617	7.47e-05	-0.000417006
37.68	-0.000462409	-0.00037	-0.000490917
37.92	-0.000643276	-0.0004	-0.000401414
38.16	-0.000110166	-5.7e-05	-0.000376823
38.4	-0.000233049	-0.00014	0.0003354
38.64	0.000103015	-0.00022	-0.000248359
38.88	-0.000250097	-0.0004	-0.000249508
39.12	-0.000209241	-0.0006	-0.000233362
39.36	-0.000261283	4.73e-05	-0.000335836
39.6	-0.000444459	-0.00017	-0.000281565
39.84	-0.000232189	-9.7e-05	-0.000243863
40.08	-0.000451887	-9.4e-05	-0.000335306
40.32	-0.000205297	0.000205	-7.1935e-05
40.56	-0.000713806	-0.00019	-0.000490614
40.8	-0.000352599	0.000187	-0.000254636
41.04	-0.000215185	-2.8e-05	0.000261754
41.28	-0.000192547	-0.00015	1.18288e-05
41.52	-0.000355167	-0.0002	-0.000243565
41.76	-7.1005e-05	-6.3e-05	-0.000503193
42	-0.000350524	-0.00056	-0.000400908
42.24	-0.000527312	-0.00025	-0.000198464
42.48	-0.000523691	-0.00015	-0.000287067
42.72	-0.000537854	-0.00079	-0.000345971
42.96	-0.000520881	-0.00015	-0.000368308
43.2	-0.000551634	-9.5e-05	-0.000669712
43.44	-0.000355474	-0.00024	1.65838e-05
43.68	-0.000322566	-0.00023	-0.00011854
43.92	-0.000414702	-0.00042	-0.000211494
44.16	-0.000471922	0.00033	-0.000213904
44.4	-0.000117904	-0.0004	-0.000160971
44.64	-0.000380185	-0.00019	-0.000275283
44.88	-0.000575104	-0.00047	-0.000477717
45.12	-0.000594228	-0.0002	-0.000507159
45.36	-0.000381702	-0.00068	-0.000360905
45.6	-0.000411177	0.000105	-0.00087091
45.84	-0.000481725	-7e-05	-0.000312354
46.08	-0.000571004	-0.00043	-0.000257964
46.32	-0.000553103	-0.00018	-6.49016e-05
46.56	-0.000498679	-0.00043	-0.000392994
46.8	-0.000403463	-0.00041	-0.000622738
47.04	-0.000453306	-0.00012	-0.000483152
47.28	-0.000293009	-0.00022	0.000222101
47.52	-0.000232306	-0.00048	-0.000373886
47.76	-0.000548909	-2.4e-05	-0.000187848
48	-0.00043996	-0.0003	-0.000602833
48.24	-0.000419427	-1.2e-05	-0.000126227
48.48	-0.000398125	-0.00022	-0.000329532
48.72	-0.000365819	-4.5e-05	-0.000252013
48.96	-0.000318691	-0.00055	-0.000586472
49.2	-0.000626956	-0.00029	-0.000489615
49.44	-0.000765267	-0.0005	-0.000428997
49.68	-0.000258642	-0.00043	-0.000578378
49.92	-0.000698516	-0.00022	-0.000608961
50.16	-0.000351452	-4.3e-05	-0.000339871
50.4	-0.00059371	-0.0004	-0.000507005
50.64	-0.000496539	0.000242	-0.000427962
50.88	-0.000706997	-0.00019	-0.00065278
51.12	-0.000616754	-0.00011	-0.00062063
51.36	-0.000492836	-0.00036	-4.38217e-05
51.6	-0.000614519	-0.00045	-0.000395504
51.84	-0.000445878	-0.00018	-0.000459801
52.08	-0.000617361	-0.00023	-0.000643808
52.32	-0.000563921	-0.00031	-0.000526453
52.56	-0.000519661	-0.00062	-0.000443601
52.8	-0.000525203	-0.00027	-0.000787581
53.04	-0.000602281	-0.00047	-0.000420613
53.28	-0.000384374	-0.00049	-0.000316315
53.52	-0.0005253	-0.00042	-0.00117958
53.76	-0.00046901	-0.00033	-0.00054749
54	-0.000483897	-0.00014	-7.42048e-05
54.24	-0.000120886	-3.9e-05	-0.00032137
54.48	-0.000524572	-0.00046	-0.000395038
54.72	-0.000634444	-6.8e-05	-0.000358904
54.96	-0.00026219	-0.00015	-0.000929976
55.2	-0.000711381	-0.00033	-0.00048978
55.44	-0.000564983	-0.00049	-0.000286317
55.68	-0.000659621	0.00025	-0.000787991
55.92	-0.000623368	0.000169	-0.000564769
56.16	-0.0005128	-0.00081	-0.000684668
56.4	-0.000546946	0.000181	-0.00053544
56.64	-0.000533772	-0.0004	-0.000692144
56.88	-0.000299583	-0.00059	-0.000229139
57.12	-0.000537539	-0.00037	-0.000639995
57.36	-0.000604004	0.0002	-0.000994714
57.6	-0.000656271	-0.00017	-0.000515548
57.84	-0.00050552	-0.00041	-0.00122136
58.08	-0.000585663	0.000343	-0.000732266
58.32	-0.000500112	-0.00052	-2.53395e-05
58.56	-0.000744469	-0.00012	-6.06129e-05
58.8	-0.000536322	-0.00039	-0.000700049
59.04	-0.000556312	-0.00055	-0.000482836
59.28	-0.000385593	-0.00033	-0.000437462
59.52	-0.000641646	-0.00073	-0.00036021
59.76	-0.000623374	-0.00095	-8.47842e-05
60	-0.000597573	-0.00038	-0.00047838
60.24	-0.000426442	-0.00045	-0.000851682
60.48	-0.000724557	-0.00012	-0.00103521
60.72	-0.000601223	-0.00027	-0.000379376
60.96	-0.000653974	5.32e-05	-0.000383395
61.2	-0.000655061	-0.00053	-0.000508298
61.44	-0.000826957	-0.00028	-0.000434743
61.68	-0.00054659	-0.00017	-0.000825371
61.92	-0.000659185	-0.0002	-0.00079449
62.16	-0.000447189	-0.00044	-0.000821671
62.4	-0.000728706	-0.00039	-0.000532535
62.64	-0.000247092	-0.00066	-0.000389329
62.88	-0.00076567	-0.00047	-0.000694331
63.12	-0.000591217	-0.00034	-0.000698906
63.36	-0.000598189	-0.00015	-0.000799948
63.6	-0.00069535	-0.00031	-5.97754e-05
63.84	-0.000605616	-8.3e-05	-0.000652407
64.08	-0.000627384	-0.00017	-0.000483376
64.32	-0.000627887	2.06e-05	-0.000729832
64.56	-0.000581655	-0.00034	-0.000244113
64.8	-0.000819968	-0.00052	-0.000229828
65.04	-0.000389179	-0.00077	-0.000273057
65.28	-0.000520783	-0.00066	-0.000878879
65.52	-0.000476636	-0.00018	-0.000629927
65.76	-0.00089588	-0.00017	-0.000991584
66	-0.000916076	-1.9e-05	-0.000816111
66.24	-0.000384652	-7.4e-05	-0.000731845
66.48	-0.0009831	-0.00057	-0.000722987
66.72	-0.000546846	-0.00042	-0.000734564
66.96	-0.000878342	-0.00051	-0.000503738
67.2	-0.000681972	-0.00037	-0.000648992
67.44	-0.000804954	-0.00035	-0.000611058
67.68	-0.000673139	-0.00011	-0.000517271
67.92	-0.000553133	-0.00032	-0.000674014
68.16	-0.000603823	-0.00034	-0.000877023
68.4	-0.000710605	-0.00066	-0.000506406
68.64	-0.000561787	-0.00082	-0.00107441
68.88	-0.000558092	-0.00031	-0.00028719
69.12	-0.000575163	-0.00058	-0.000709741
69.36	-0.000784807	-0.00072	-0.000387483
69.6	-0.000789284	-0.00048	-0.000764555
69.84	-0.000728889	-5.9e-05	-0.000510573
70.08	-0.000677128	-0.00043	-0.000303911
70.32	-0.000706227	-0.0006	-0.000538721
70.56	-0.000777985	-6.1e-05	-0.00065485
70.8	-0.000752471	-0.00039	-0.000957802
71.04	-0.00063742	-0.00047	-0.000736584
71.28	-0.000470595	-0.00026	-0.000535151
71.52	-0.000644	-0.0003	-0.00015068
71.76	-0.000663816	-0.00039	-0.000284995
72	-0.000576254	-0.0003	-0.000609588
72.24	-0.000814363	-0.00041	-0.000724397
72.48	-0.00077244	-0.00014	-0.000880672
72.72	-0.000404246	0.000132	-0.000920459
72.96	-0.000938147	-0.0005	-0.000641015
73.2	-0.00083572	-0.00022	-0.000761255
73.44	-0.000729376	-0.00028	-0.000809516
73.68	-0.000982533	-0.0005	-0.000378944
73.92	-0.000825284	-0.00066	-0.000767288
74.16	-0.000672507	-0.00059	-0.000948633
74.4	-0.000725782	-0.00027	-0.000574836
74.64	-0.00094249	-0.00036	-0.000887953
74.88	-0.000799678	-4.8e-05	-0.000653286
75.12	-0.000657935	-0.00035	-0.000287564
75.36	-0.000695127	-0.00054	-0.000525113
75.6	-0.000636133	-0.00057	-0.000617775
75.84	-0.000737934	-0.00017	-0.0008886
76.08	-0.00078359	-0.00048	-0.000823523
76.32	-0.000947	-0.00014	-0.000498139
76.56	-0.000777264	-0.00043	-0.000765693
76.8	-0.000578662	-0.00053	-0.000838661
77.04	-0.000314156	-0.00063	-0.0008886
77.28	-0.000798961	-0.00019	-0.000636686
77.52	-0.000623899	-0.00017	-0.000478894
77.76	-0.000746202	-0.0006	-0.000524019
78	-0.000982808	-0.00047	-0.000726302
78.24	-0.000828491	-0.00062	-0.00106372
78.48	-0.000637582	-0.00015	-0.000784416
78.72	-0.000836664	-0.0003	-0.000948067
78.96	-0.000914248	-0.00069	-0.000946935
79.2	-0.000920666	-0.00082	-0.000492013
79.44	-0.000888367	-0.00073	-0.00120453
79.68	-0.000795358	-0.00037	-0.000760449
79.92	-0.000812663	-9.6e-05	-0.00102599
80.16	-0.000638769	-0.00085	-0.000639978
80.4	-0.000674855	-0.00088	-0.000815964
80.64	-0.00109168	-0.00051	-0.000467624
80.88	-0.000728878	-0.00054	-0.000796852
81.12	-0.000855465	-0.00055	-0.000484309
81.36	-0.000722401	-9.4e-05	-0.00115173
81.6	-0.000901084	-0.00059	-0.000751987
81.84	-0.00091069	-0.00058	-0.000891327
82.08	-0.000747216	-0.00041	-0.000755883
82.32	-0.000697099	-0.00047	-0.00109277
82.56	-0.000674873	-0.00012	-0.000510675
82.8	-0.000640744	-0.00037	-0.00099665
83.04	-0.000922834	-3.9e-05	-0.000731107
83.28	-0.000678423	-0.00109	-0.000889942
83.52	-0.000946477	-0.00078	-0.00119849
83.76	-0.000776595	-0.0007	-0.000609339
84	-0.000795493	-0.00035	-0.000547689
84.24	-0.000708514	-0.00067	-0.0012447
84.48	-0.000813874	-0.00067	-0.000729252
84.72	-0.00109851	-0.00065	-0.000615224
84.96	-0.000929596	-0.00052	-0.000669828
85.2	-0.0010103	-0.00051	-0.000732207
85.44	-0.000789327	-0.00015	-0.00110012
85.68	-0.000845684	-0.00016	-0.000540821
85.92	-0.000779603	-0.00041	-0.00111607
86.16	-0.000801661	-0.00046	-0.000874039
86.4	-0.0011323	-0.00055	-0.000676324
86.64	-0.000930352	-0.00108	-0.000714597
86.88	-0.000834212	-0.00053	-0.000477294
87.12	-0.000800391	-0.00064	-0.000485963
87.36	-0.000673079	-0.0007	-0.000845763
87.6	-0.000990418	-0.00019	-0.00108006
87.84	-0.000735459	-0.00033	-0.00104797
88.08	-0.000886769	-0.00011	-0.00102266
88.32	-0.00073068	-0.00015	-0.00130648
88.56	-0.00082421	-0.00038	-0.00109902
88.8	-0.000760597	-1e-06	-0.000762723
89.04	-0.000946792	-0.00096	-0.000894671
89.28	-0.000638031	5.08e-05	-0.000961257
89.52	-0.000822233	-0.00074	-0.00106817
89.76	-0.000986679	-0.00036	-0.00111861
90	-0.000653053	-0.00034	-0.00111578
90.24	-0.00082684	-0.00067	-0.00103315
90.48	-0.000756658	-0.00048	-0.000725753
90.72	-0.00117156	-0.00058	-0.000868773
90.96	-0.000510625	-0.0008	-0.000697297
91.2	-0.000895849	-0.0005	-0.001134
91.44	-0.000752567	-0.00021	-0.00101364
91.68	-0.00102763	-0.00063	-0.000810847
91.92	-0.000885348	-0.00053	-0.00112287
92.16	-0.000648028	-0.00045	-0.000737602
92.4	-0.000956916	-0.0005	-0.000911145
92.64	-0.000909251	-0.00039	-0.000762601
92.88	-0.000660731	-0.00078	-0.000871674
93.12	-0.000942239	-0.00057	-0.00100417
93.36	-0.00106528	-0.00057	-0.00114202
93.6	-0.00102572	-0.00015	-0.00133534
93.84	-0.000818141	-0.00039	-0.00110826
94.08	-0.000935242	-0.00055	-0.00125247
94.32	-0.00118049	-0.0004	-0.000702048
94.56	-0.00101964	-0.00059	-0.000399551
94.8	-0.000522794	-0.00034	-0.000640631
95.04	-0.000799123	-0.00087	-0.0011166
95.28	-0.000864339	-0.00075	-0.000850644
95.52	-0.00113107	-0.0009	-0.0010399
95.76	-0.00084805	-0.00046	-0.00113748
96	-0.000799955	-0.00052	-0.000649104
96.24	-0.000968359	-0.0004	-0.000591737
96.48	-0.00115721	-0.00111	-0.000698886
96.72	-0.000683682	-0.00066	-0.000979153
96.96	-0.00103223	-0.00086	-0.000803167
97.2	-0.000919517	-0.00015	-0.000690897
97.44	-0.00105969	-0.00042	-0.00132254
97.68	-0.00109066	-5.9e-05	-0.000609941
97.92	-0.000790499	-0.00085	-0.000948806
98.16	-0.000789664	-0.00078	-0.00083525
98.4	-0.0010714	-0.00059	-0.000723443
98.64	-0.000960004	-0.00075	-0.00108691
98.88	-0.000967604	-0.00051	-0.000847615
99.12	-0.00129399	-0.00058	-0.000732066
99.36	-0.000892841	-0.00078	-0.00105359
99.6	-0.000900841	-0.00086	-0.000965452
99.84	-0.00110752	-0.00075	-0.000954525
100.08	-0.00111073	-0.00051	-0.00092038
100.32	-0.000911609	-0.00046	-0.00074284
100.56	-0.000947267	-0.00061	-0.000913486
100.8	-0.00123811	-0.00068	-0.000563644
101.04	-0.000905959	-0.00074	-0.000723881
101.28	-0.000864426	-0.0004	-0.000780736
101.52	-0.000971359	-0.00015	-0.00111727
101.76	-0.000964928	-0.00096	-0.000478996
102	-0.000933442	-0.00052	-0.000652234
102.24	-0.000869209	-0.00028	-0.000984806
102.48	-0.00106929	-0.00018	-0.00098226
102.72	-0.00100788	-0.00023	-0.000716513
102.96	-0.000887981	-0.00088	-0.00124343
103.2	-0.00117594	-0.00073	-0.00108894
103.44	-0.000862847	-0.00074	-0.00119969
103.68	-0.00113126	-0.00061	-0.00113338
103.92	-0.0011615	-0.00068	-0.000722119
104.16	-0.000845403	-0.00072	-0.000830295
104.4	-0.000861147	-0.00074	-0.00122291
104.64	-0.0012477	-0.00038	-0.00092953
104.88	-0.00119458	-0.00083	-0.00074076
105.12	-0.00109184	-0.0008	-0.0014024
105.36	-0.00120181	-0.00021	-0.00117419
105.6	-0.00101973	-0.00075	-0.00133883
105.84	-0.00123707	-0.00076	-0.000506581
106.08	-0.000987365	-0.00079	-0.000911036
106.32	-0.000738987	-0.00063	-0.00109839
106.56	-0.000758648	-0.00046	-0.000482633
106.8	-0.000988742	-0.00056	-0.00101276
107.04	-0.00118428	-0.00041	-0.000910112
107.28	-0.000923726	-0.00064	-0.00097613
107.52	-0.00115562	-0.00076	-0.000557705
107.76	-0.00106702	-0.00057	-0.00143222
108	-0.000966588	-0.00061	-0.000785962
108.24	-0.000653079	-0.00024	-0.000953102
108.48	-0.000900071	-0.00051	-0.000970925
108.72	-0.00103279	-0.00088	-0.00111212
108.96	-0.00102738	-0.00019	-0.000943978
109.2	-0.000975714	-0.00059	-0.00122282
109.44	-0.000975423	-0.00074	-0.000684248
109.68	-0.00109713	-0.00071	-0.000972905
109.92	-0.00106265	-0.00081	-0.00126389
110.16	-0.000857047	-0.00039	-0.000993528
110.4	-0.000943183	-0.00061	-0.00116199
110.64	-0.000962859	-0.00066	-0.00148767
110.88	-0.00108498	-0.00079	-0.001114
111.12	-0.0012672	-0.00062	-0.000999884
111.36	-0.00124927	-0.00079	-0.00123761
111.6	-0.00126142	-0.00096	-0.00116382
111.84	-0.00103887	-0.00088	-0.000811226
112.08	-0.00114773	-0.00046	-0.00103327
112.32	-0.000934047	-0.00103	-0.00118605
112.56	-0.00114411	-0.00053	-0.000822386
112.8	-0.00108429	-0.00107	-0.00144188
113.04	-0.00100366	-0.00091	-0.000879127
113.28	-0.000916523	-0.00077	-0.00101205
113.52	-0.00111083	-0.0003	-0.00140157
113.76	-0.00106755	-0.00082	-0.00132524
114	-0.00118523	-0.00076	-0.00135802
114.24	-0.00121951	-0.00075	-0.000851887
114.48	-0.000757285	-0.0006	-0.00109997
114.72	-0.000976273	-0.00031	-0.000937324
114.96	-0.00109527	-0.0004	-0.000850871
115.2	-0.00110069	-0.00059	-0.00121703
115.44	-0.00108699	-0.00082	-0.00102494
115.68	-0.000876339	-0.00093	-0.00104592
115.92	-0.00110341	-0.00059	-0.000780941
116.16	-0.000785831	-0.00103	-0.0012451
116.4	-0.00142296	-0.00085	-0.000780354
116.64	-0.000999484	-0.00115	-0.00126533
116.88	-0.00130286	-0.00059	-0.00117603
117.12	-0.00146801	-0.0006	-0.00113507
117.36	-0.00121003	-0.00074	-0.00126568
117.6	-0.0012038	-0.00113	-0.0012106
117.84	-0.00102049	-0.00062	-0.00136931
118.08	-0.00116525	-0.00085	-0.000984787
118.32	-0.00109786	-0.00072	-0.0010291
118.56	-0.000919982	-0.00038	-0.00109696
118.8	-0.00122033	-0.0007	-0.00109063
119.04	-0.00130269	-0.0009	-0.00122678
119.28	-0.00133554	-0.00071	-0.00124616
119.52	-0.00112857	-0.00071	-0.000925064
119.76	-0.00121567	-0.00041	-0.00104632
120	-0.00150808	-0.00071	-0.00103238
120.24	-0.00117849	-0.00048	-0.000803731
120.48	-0.00123726	-0.00103	-0.00114815
120.72	-0.00118177	-0.00084	-0.000657185
120.96	-0.00110665	-0.00067	-0.00115415
121.2	-0.000987356	-0.00077	-0.00120014
121.44	-0.00121044	-0.00038	-0.00118817
121.68	-0.00124568	-0.00058	-0.00146108
121.92	-0.00116533	-0.00043	-0.000686973
122.16	-0.000999702	-0.00099	-0.000886195
122.4	-0.00112013	-0.00058	-0.000850862
122.64	-0.00116086	-0.0006	-0.00131644
122.88	-0.00102221	-0.00064	-0.000920165
123.12	-0.0013013	-0.00081	-0.000616832
123.36	-0.00125395	-0.00081	-0.000519809
123.6	-0.000944949	-0.00081	-0.00127073
123.84	-0.00131412	-0.00078	-0.00104418
124.08	-0.00113036	-0.00047	-0.00110266
124.32	-0.00107116	-0.00069	-0.000951631
124.56	-0.00112909	-0.00069	-0.000898632
124.8	-0.00125536	-0.00103	-0.00106555
125.04	-0.00117261	-0.00043	-0.000913078
125.28	-0.00130788	-0.00118	-0.00132538
125.52	-0.0010664	-0.00104	-0.0011014
125.76	-0.000997282	-0.00079	-0.00109949
126	-0.00115909	-0.00079	-0.00111093
126.24	-0.00114912	-0.0009	-0.000806027
126.48	-0.00110092	-0.00058	-0.0010022
126.72	-0.00152408	-0.00059	-0.00123435
126.96	-0.000949175	-0.00069	-0.00141899
127.2	-0.00117579	-0.001	-0.00134171
127.44	-0.00120755	-0.00072	-0.0013182
127.68	-0.000965342	-0.00134	-0.00134387
127.92	-0.00108307	-0.00063	-0.00130277
128.16	-0.00120018	-0.00094	-0.000932972
128.4	-0.00113677	-0.00098	-0.00145045
128.64	-0.00109221	-0.00062	-0.00133215
128.88	-0.000998692	-0.00044	-0.00107203
129.12	-0.00117507	-0.00087	-0.000873797
129.36	-0.00125171	-0.00046	-0.000956277
129.6	-0.00122757	-0.00066	-0.0012613
129.84	-0.000980478	-0.00075	-0.000876708
130.08	-0.00103095	-0.00106	-0.000996759
130.32	-0.00122854	-0.00068	-0.000718029
130.56	-0.0011253	-0.00088	-0.00162628
130.8	-0.00110179	-0.00057	-0.00160286
131.04	-0.00121619	-0.00073	-0.00085723
131.28	-0.000716972	-0.00086	-0.00124299
131.52	-0.00118549	-0.00057	-0.00129501
131.76	-0.0010059	-0.00055	-0.00130716
132	-0.00111966	-0.00068	-0.00112558
132.24	-0.00116522	-0.00082	-0.000666803
132.48	-0.00140332	-0.00069	-0.00133314
132.72	-0.00107276	-0.00098	-0.00115433
132.96	-0.00127653	-0.00061	-0.000931313
133.2	-0.0011868	-0.00087	-0.00143915
133.44	-0.00108256	-0.00087	-0.00117668
133.68	-0.00110987	-0.00087	-0.00153507
133.92	-0.00143135	-0.00037	-0.00163568
134.16	-0.00158949	-0.00091	-0.00106707
134.4	-0.00131065	-0.00099	-0.00148455
134.64	-0.00123596	-0.00041	-0.0012153
134.88	-0.00123716	-0.00099	-0.00146917
135.12	-0.00136395	-0.00079	-0.00101817
135.36	-0.00104721	-0.00078	-0.00115643
135.6	-0.00144651	-0.00092	-0.00157672
135.84	-0.00156054	-0.00088	-0.00124818
136.08	-0.00158515	-0.00085	-0.00149576
136.32	-0.00125214	-0.00046	-0.00185506
136.56	-0.00152569	-0.00059	-0.00107767
136.8	-0.0014904	-0.00058	-0.00135182
137.04	-0.00101161	-0.00079	-0.00182473
137.28	-0.00104817	-0.00096	-0.000980076
137.52	-0.0012577	-0.00086	-0.00121159
137.76	-0.00154774	-0.00077	-0.00132708
138	-0.00135156	-0.00093	-0.000936248
138.24	-0.00131547	-0.00077	-0.00132091
138.48	-0.0011687	-0.00079	-0.00159244
138.72	-0.00125252	-0.00057	-0.00145237
138.96	-0.00121472	-0.00075	-0.00156348
139.2	-0.00119051	-0.00081	-0.00129382
139.44	-0.0012478	-0.00057	-0.00137804
139.68	-0.00151181	-0.00065	-0.00109902
139.92	-0.00122197	-0.00103	-0.00152643
140.16	-0.00138748	-0.00089	-0.00152031
140.4	-0.00146461	-0.0006	-0.00140331
140.64	-0.000983307	-0.00114	-0.00133515
140.88	-0.00141167	-0.00056	-0.00119971
141.12	-0.00130808	-0.00073	-0.00128036
141.36	-0.00117183	-0.00092	-0.0015928
141.6	-0.0014691	-0.00051	-0.00149659
141.84	-0.00140265	-0.00097	-0.00190927
142.08	-0.00138237	-0.00086	-0.00135984
142.32	-0.00157112	-0.00133	-0.00106774
142.56	-0.00154354	-0.00075	-0.0011651
142.8	-0.00113312	-0.00056	-0.00163433
143.04	-0.00141672	-0.00107	-0.00119358
143.28	-0.0010113	-0.00065	-0.00147243
143.52	-0.00151769	-0.00059	-0.00153387
143.76	-0.00131974	-0.00083	-0.0014862
144	-0.00104498	-0.00092	-0.0014389
144.24	-0.00130557	-0.00025	-0.00152032
144.48	-0.00138228	-0.00086	-0.00131211
144.72	-0.00139473	-0.00101	-0.00128165
144.96	-0.00126949	-0.00143	-0.0013354
145.2	-0.00133651	-0.00069	-0.00128949
145.44	-0.00140599	-0.00071	-0.00117973
145.68	-0.00142857	-0.00083	-0.00163283
145.92	-0.00130889	-0.00078	-0.0013099
146.16	-0.00128631	-0.00125	-0.00140235
146.4	-0.00112358	-0.00075	-0.00142677
146.64	-0.00150372	-0.00118	-0.00140219
146.88	-0.00155171	-0.00056	-0.00122707
147.12	-0.00124319	-0.00093	-0.0014108
147.36	-0.00147037	-0.00107	-0.000904904
147.6	-0.00118847	-0.00083	-0.00100109
147.84	-0.00156989	-0.00122	-0.000940277
148.08	-0.0012136	-0.00074	-0.0015333
148.32	-0.00115547	-0.00079	-0.00185572
148.56	-0.0013036	-0.00047	-0.001119
148.8	-0.00120065	-0.00098	-0.00110446
149.04	-0.00101981	-0.00101	-0.00136055
149.28	-0.00111011	-0.00076	-0.00202191
149.52	-0.00150378	-0.00075	-0.00142416
149.76	-0.00118919	-0.00117	-0.00127053
150	-0.001193	-0.00113	-0.00123786
150.24	-0.000854658	-0.00048	-0.00128226
150.48	-0.000256847	-4.3e-05	-0.00100196
150.72	-0.00971426	-0.01042	-0.000210254
150.96	0.0460783	0.015724	-0.00970063
151.2	-0.0560691	-0.05404	0.0434771
151.44	0.145922	0.131638	-0.0564835
151.68	0.0148305	0.014058	0.139521
151.92	0.000834074	0.001408	0.0154306
152.16	0.00107366	0.001513	0.00155003
152.4	0.00181748	0.001564	0.00208629
152.64	0.00177598	0.001941	0.00169262
152.88	0.00187574	0.002054	0.00214318
153.12	0.00189602	0.002312	0.00272222
153.36	0.00190906	0.002831	0.00277242
153.6	0.00215574	0.002859	0.00266427
153.84	0.00247018	0.00301	0.00257457
154.08	0.00272479	0.003326	0.00325816
154.32	0.00276375	0.003209	0.00332697
154.56	0.00297684	0.003403	0.00337434
154.8	0.00305422	0.003564	0.00340478
155.04	0.00329397	0.003425	0.00374829
155.28	0.00338953	0.003577	0.00365963
155.52	0.00339015	0.00331	0.00427862
155.76	0.00338322	0.003921	0.00387064
156	0.00363532	0.003463	0.00406947
156.24	0.0036302	0.003974	0.00417282
156.48	0.00380446	0.003973	0.00381439
156.72	0.00408164	0.004017	0.00449758
156.96	0.00403595	0.004051	0.0043739
157.2	0.00436755	0.004248	0.00429865
157.44	0.00408543	0.004599	0.00472244
157.68	0.00408915	0.004272	0.00461454
157.92	0.00446339	0.004214	0.00471459
158.16	0.00471506	0.004558	0.00467399
158.4	0.00427959	0.004323	0.00512624
158.64	0.00437532	0.00488	0.00477766
158.88	0.00476056	0.004467	0.00430496
159.12	0.00475674	0.004521	0.00488565
159.36	0.00480594	0.005391	0.00519675
159.6	0.00479193	0.004737	0.00504644
159.84	0.00457162	0.005037	0.00516742
160.08	0.00506865	0.005057	0.00529307
160.32	0.00489527	0.005168	0.00532369
160.56	0.00505163	0.004959	0.00548285
160.8	0.00520978	0.004991	0.00551698
161.04	0.00514842	0.005343	0.00502659
161.28	0.00518201	0.005274	0.00532771
161.52	0.00558122	0.004951	0.0051749
161.76	0.00543136	0.005718	0.00571716
162	0.00533041	0.005467	0.00581595
162.24	0.00543176	0.005413	0.00557894
162.48	0.00515367	0.00495	0.00525264
162.72	0.0053216	0.005225	0.00559087
162.96	0.00552043	0.005393	0.00570131
163.2	0.00525024	0.005392	0.00542449
163.44	0.00543017	0.005084	0.00600031
163.68	0.00544518	0.00533	0.00547246
163.92	0.00551904	0.005467	0.00559346
164.16	0.00588789	0.005381	0.00547676
164.4	0.00553348	0.005283	0.00527756
164.64	0.00555682	0.005683	0.00595397
164.88	0.00565704	0.005793	0.00588274
165.12	0.00572984	0.005759	0.00611028
165.36	0.00566902	0.006089	0.0063738
165.6	0.00552475	0.006215	0.00570802
165.84	0.00582304	0.005643	0.00619415
166.08	0.00585252	0.005876	0.00549208
166.32	0.00573274	0.005617	0.00593307
166.56	0.00573459	0.006018	0.00605707
166.8	0.0056698	0.00562	0.00601167
167.04	0.00569497	0.006157	0.0063003
167.28	0.00588476	0.005826	0.00600028
167.52	0.00591991	0.005934	0.00612151
167.76	0.00608479	0.005478	0.00605736
168	0.00596716	0.006116	0.00651796
168.24	0.00620527	0.005743	0.0060126
168.48	0.00575094	0.005826	0.00605938
168.72	0.00609399	0.006058	0.00601977
168.96	0.00587641	0.00603	0.00605315
169.2	0.00603005	0.006609	0.00659564
169.44	0.00593525	0.006237	0.00609265
169.68	0.00605319	0.005894	0.00567673
169.92	0.00641142	0.006145	0.00600871
170.16	0.00607236	0.006142	0.00618068
170.4	0.00615495	0.005954	0.00610205
170.64	0.00633369	0.006553	0.00665377
170.88	0.00615506	0.005779	0.00613966
171.12	0.00618384	0.006433	0.0063713
171.36	0.00637244	0.006478	0.0068453
171.6	0.00617592	0.006609	0.00613816
171.84	0.00645202	0.006446	0.00645888
172.08	0.00613766	0.006193	0.00637112
172.32	0.00622734	0.006012	0.00645177
172.56	0.00624662	0.006274	0.00632436
172.8	0.00655971	0.006089	0.0062318
173.04	0.00626436	0.006092	0.00606995
173.28	0.00637745	0.00623	0.00593914
173.52	0.00616891	0.005958	0.00631861
173.76	0.0062989	0.006389	0.00625133
174	0.0065888	0.006202	0.0063432
174.24	0.00633626	0.006402	0.00613074
174.48	0.0061906	0.006379	0.00621024
174.72	0.0065737	0.006336	0.00701146
174.96	0.00638538	0.006417	0.00588094
175.2	0.00619858	0.006705	0.00660256
175.44	0.00661734	0.006244	0.00677523
175.68	0.00658147	0.006384	0.00664324
175.92	0.00641778	0.006359	0.00666293
176.16	0.00677666	0.005857	0.00644603
176.4	0.00644125	0.006115	0.00634107
176.64	0.00658754	0.006797	0.00638647
176.88	0.00648439	0.006282	0.00676015
177.12	0.00649739	0.006387	0.00637366
177.36	0.0067584	0.006367	0.00608709
177.6	0.00656433	0.006325	0.00570884
177.84	0.00663386	0.006793	0.0068754
178.08	0.006572	0.006333	0.00612682
178.32	0.00664769	0.006779	0.00665222
178.56	0.00651267	0.00653	0.00702378
178.8	0.00651212	0.006167	0.0062611
179.04	0.00638562	0.006549	0.00589237
179.28	0.00627975	0.006846	0.00710052
179.52	0.0066661	0.006682	0.00659619
179.76	0.00664293	0.006726	0.00689645
180	0.00652447	0.006602	0.00645276
180.24	0.00639907	0.006579	0.00639728
180.48	0.00680512	0.006961	0.0066137
180.72	0.00644075	0.006721	0.00601759
180.96	0.0066089	0.006666	0.00621838
181.2	0.00694263	0.006231	0.00656621
181.44	0.00683101	0.006558	0.0068974
181.68	0.00671649	0.006611	0.00673575
181.92	0.00641121	0.006889	0.00683722
182.16	0.00687706	0.006691	0.00680257
182.4	0.00652576	0.006547	0.00691871
182.64	0.00647476	0.00686	0.00613456
182.88	0.00670027	0.006668	0.00669599
183.12	0.00662287	0.007201	0.00702464
183.36	0.00642979	0.006697	0.00668451
183.6	0.0071388	0.006797	0.00660734
183.84	0.00662316	0.006777	0.00666251
184.08	0.00680356	0.006882	0.00692571
184.32	0.00662987	0.006468	0.00636994
184.56	0.00684314	0.006548	0.00664845
184.8	0.00676421	0.007012	0.00684352
185.04	0.0067996	0.006661	0.00669949
185.28	0.0063008	0.006433	0.00668065
185.52	0.00675059	0.006336	0.00624934
185.76	0.00657414	0.006803	0.00657618
186	0.00670472	0.006974	0.0063787
186.24	0.00681179	0.006389	0.00656878
186.48	0.00672084	0.006582	0.00646287
186.72	0.00679942	0.006894	0.00645463
186.96	0.00668261	0.006364	0.00648842
187.2	0.00681227	0.006753	0.00707428
187.44	0.00689031	0.006502	0.00672327
187.68	0.00686916	0.006591	0.00648752
187.92	0.006758	0.006786	0.00644176
188.16	0.0068757	0.006597	0.00660298
188.4	0.00671835	0.006533	0.00616257
188.64	0.00658723	0.006794	0.00655291
188.88	0.00687786	0.006377	0.00679901
189.12	0.00702506	0.006468	0.00634586
189.36	0.00680869	0.006892	0.006461
189.6	0.00667215	0.006285	0.00668953
189.84	0.00657564	0.006806	0.00691687
190.08	0.00662	0.006568	0.00650146
190.32	0.00665427	0.006652	0.00693322
190.56	0.00655953	0.006454	0.00656858
190.8	0.00670303	0.006388	0.00653758
191.04	0.00669433	0.006595	0.00672047
191.28	0.00677993	0.006974	0.00683504
191.52	0.00662986	0.006668	0.00649518
191.76	0.00666946	0.007046	0.0067106
192	0.0068669	0.006626	0.00680525
192.24	0.00664082	0.006473	0.00685455
192.48	0.00675662	0.006659	0.00640109
192.72	0.00685507	0.006423	0.00648439
192.96	0.00663887	0.006802	0.00659597
193.2	0.00663982	0.00645	0.00662044
193.44	0.00691318	0.006629	0.00640973
193.68	0.00655461	0.006924	0.00657629
193.92	0.00677823	0.006668	0.00672828
194.16	0.0067446	0.006649	0.00648125
194.4	0.00687235	0.007146	0.00672937
194.64	0.00668658	0.006708	0.00633546
194.88	0.00643049	0.006737	0.00704217
195.12	0.00651462	0.006697	0.00648148
195.36	0.00650238	0.006817	0.00680275
195.6	0.00687841	0.006788	0.00659632
195.84	0.00681604	0.007112	0.00677005
196.08	0.00692935	0.006176	0.00720319
196.32	0.00671896	0.006915	0.00667821
196.56	0.00668944	0.006538	0.00657358
196.8	0.00669341	0.006389	0.00681045
197.04	0.00687968	0.006791	0.00644214
197.28	0.00677148	0.006881	0.00650512
197.52	0.00665989	0.006845	0.00648548
197.76	0.00654539	0.006962	0.00674427
198	0.00674042	0.007103	0.00708391
198.24	0.00671327	0.006656	0.00702923
198.48	0.00664447	0.006647	0.00656187
198.72	0.00684844	0.007019	0.00690925
198.96	0.00687696	0.007026	0.00657192
199.2	0.00667799	0.006289	0.00691173
199.44	0.00668786	0.006742	0.00695825
199.68	0.006879	0.007	0.00615247
199.92	0.00683352	0.006493	0.0069941
200.16	0.00659226	0.00658	0.00693675
200.4	0.00660472	0.006835	0.00639973
200.64	0.00671744	0.006355	0.00643376
200.88	0.00654535	0.007245	0.0067653
201.12	0.00665794	0.006174	0.00678327
201.36	0.00660507	0.006724	0.00692919
201.6	0.00659144	0.006565	0.00671471
201.84	0.00693005	0.006673	0.00647312
202.08	0.00658069	0.006735	0.00666254
202.32	0.00667274	0.006525	0.00684668
202.56	0.00673824	0.00662	0.00663854
202.8	0.00687611	0.006875	0.00630849
203.04	0.00665855	0.006465	0.00631051
203.28	0.00638659	0.006713	0.00673412
203.52	0.00671099	0.0069	0.00597585
203.76	0.00680462	0.00669	0.0066594
204	0.00686562	0.006944	0.00670328
204.24	0.0064811	0.006803	0.00678626
204.48	0.00660295	0.006698	0.00633987
204.72	0.00656202	0.007154	0.00697649
204.96	0.00678637	0.007199	0.00679558
205.2	0.00641813	0.006096	0.00655197
205.44	0.00665695	0.00643	0.0068694
205.68	0.00688701	0.006986	0.00716791
205.92	0.00656206	0.006402	0.00626661
206.16	0.00639417	0.006476	0.00696131
206.4	0.00664227	0.006715	0.00658946
206.64	0.00663364	0.006779	0.00658517
206.88	0.00664462	0.006696	0.00676903
207.12	0.00693955	0.006554	0.00695022
207.36	0.00661494	0.006738	0.00623145
207.6	0.0065773	0.006294	0.0063561
207.84	0.00669138	0.006653	0.00675414
208.08	0.00657227	0.006417	0.00668753
208.32	0.00663426	0.0069	0.00690249
208.56	0.00680816	0.006635	0.00672073
208.8	0.00669522	0.006677	0.00665199
209.04	0.00673534	0.006761	0.00654888
209.28	0.00651022	0.006566	0.00659477
209.52	0.00674037	0.006562	0.00687311
209.76	0.00655609	0.006605	0.00707827
210	0.00655162	0.006656	0.00674295
210.24	0.00652025	0.006956	0.00666235
210.48	0.00671155	0.006645	0.00672428
210.72	0.0067402	0.006693	0.00670409
210.96	0.00668772	0.006405	0.00683564
211.2	0.00694328	0.006492	0.00622023
211.44	0.00659602	0.006528	0.00688795
211.68	0.00671078	0.006589	0.00657507
211.92	0.00673047	0.00657	0.00636147
212.16	0.00633122	0.006653	0.0064775
212.4	0.00635248	0.006492	0.00662797
212.64	0.00673144	0.006902	0.00665154
212.88	0.00669109	0.006829	0.00650101
213.12	0.00679036	0.006634	0.00712572
213.36	0.00671542	0.006285	0.00659794
213.6	0.00628445	0.006717	0.00667877
213.84	0.0065702	0.006956	0.00683533
214.08	0.00657678	0.006859	0.00696993
214.32	0.00665551	0.006717	0.00664554
214.56	0.00665105	0.006985	0.0069297
214.8	0.00659883	0.006994	0.00678079
215.04	0.00654691	0.006836	0.00675741
215.28	0.00646693	0.006554	0.00691081
215.52	0.00686614	0.006851	0.00700702
215.76	0.00692294	0.006773	0.00660308
216	0.00656419	0.006301	0.00670897
216.24	0.00671406	0.006445	0.00667654
216.48	0.00660993	0.006367	0.00671096
216.72	0.00679514	0.00674	0.0068213
216.96	0.00645509	0.006912	0.00664818
217.2	0.00663736	0.006207	0.00650044
217.44	0.00658948	0.006539	0.00628148
217.68	0.00622136	0.006488	0.00667311
217.92	0.0065535	0.006482	0.00635548
218.16	0.00656374	0.006509	0.00666504
218.4	0.00640718	0.006618	0.00659871
218.64	0.00649682	0.006596	0.0071326
218.88	0.00671297	0.006621	0.00654128
219.12	0.00659646	0.007064	0.00642833
219.36	0.00650191	0.00668	0.00676165
219.6	0.00686671	0.006683	0.00607661
219.84	0.00643916	0.006552	0.00686588
220.08	0.00653642	0.006601	0.00675389
220.32	0.0064722	0.006638	0.00610834
220.56	0.00656179	0.006323	0.00704358
220.8	0.00659072	0.006442	0.00677174
221.04	0.0064095	0.006891	0.00639012
221.28	0.00646424	0.006342	0.0064271
221.52	0.0063611	0.006389	0.00644721
221.76	0.00648323	0.006488	0.00652889
222	0.00691634	0.006954	0.0067786
222.24	0.00665044	0.006897	0.00690776
222.48	0.00634134	0.006749	0.00607343
222.72	0.00639874	0.006508	0.00656657
222.96	0.00647992	0.006609	0.00675006
223.2	0.00664815	0.006682	0.00682606
223.44	0.00654564	0.006702	0.00663514
223.68	0.00627446	0.006826	0.00623182
223.92	0.00647485	0.006311	0.00654731
224.16	0.0068177	0.006617	0.00657786
224.4	0.00654582	0.006156	0.00697593
224.64	0.00649522	0.006167	0.00626794
224.88	0.00624061	0.006482	0.00672986
225.12	0.00660879	0.006347	0.00627277
225.36	0.00669872	0.006241	0.00635506
225.6	0.00616474	0.006164	0.00661571
225.84	0.0065793	0.006545	0.00679987
226.08	0.00643053	0.006466	0.00628209
226.32	0.0065607	0.006128	0.00613601
226.56	0.00640451	0.006144	0.00612802
226.8	0.00635667	0.006235	0.00587729
227.04	0.00616673	0.006127	0.00652112
227.28	0.00611556	0.00657	0.00629275
227.52	0.0062955	0.006516	0.00619205
227.76	0.00631744	0.006686	0.00647208
228	0.00657269	0.006444	0.00677905
228.24	0.00645192	0.006405	0.00651045
228.48	0.00638306	0.006198	0.00637716
228.72	0.00641983	0.006458	0.00607758
228.96	0.00628467	0.006359	0.00673343
229.2	0.00625261	0.00642	0.00649685
229.44	0.00623798	0.00659	0.00629678
229.68	0.00618845	0.006045	0.00652113
229.92	0.00642879	0.006199	0.00591744
230.16	0.00621012	0.006137	0.00664186
230.4	0.00631933	0.006803	0.00644144
230.64	0.00652216	0.006144	0.00605286
230.88	0.0063523	0.006163	0.00666042
231.12	0.00640283	0.006708	0.00643231
231.36	0.00613348	0.006501	0.00611883
231.6	0.00635112	0.00641	0.0060862
231.84	0.00608967	0.006652	0.00633913
232.08	0.00601506	0.005919	0.00609034
232.32	0.00642752	0.006065	0.00625789
232.56	0.00627357	0.006698	0.00638971
232.8	0.00654355	0.006371	0.00622766
233.04	0.0063257	0.0066	0.00633936
233.28	0.00610917	0.00604	0.00629924
233.52	0.00646291	0.006086	0.00631606
233.76	0.00635652	0.006394	0.00618875
234	0.0061704	0.006522	0.00606385
234.24	0.00608542	0.006566	0.00593681
234.48	0.00620461	0.006277	0.00569035
234.72	0.0058854	0.006468	0.00601231
234.96	0.00650138	0.006644	0.00631641
235.2	0.00623826	0.006106	0.00617638
235.44	0.00595684	0.006111	0.00640636
235.68	0.00623246	0.006268	0.00614939
235.92	0.00630963	0.006219	0.00607702
236.16	0.00615651	0.006507	0.00635947
236.4	0.00621833	0.005678	0.00673426
236.64	0.00586308	0.006182	0.00624934
236.88	0.00620168	0.006058	0.00586547
237.12	0.00619192	0.006057	0.00646725
237.36	0.00615814	0.006012	0.00644567
237.6	0.00643548	0.006365	0.00583291
237.84	0.00624334	0.006313	0.0062384
238.08	0.0062241	0.005827	0.00657817
238.32	0.00625373	0.006518	0.00663001
238.56	0.0065115	0.006005	0.00612176
238.8	0.00631311	0.006356	0.00642173
239.04	0.00629761	0.006356	0.0063465
239.28	0.00599968	0.006731	0.00615321
239.52	0.00599225	0.006055	0.00598714
239.76	0.00622193	0.006089	0.00597785
			0.00595846

## Sheet: R12 GL
Time	Exp1	Exp2	Exp3	Exp4
0	-4e-05	0.0004	0.00029	0.0002
0.24	-1e-05	-0.00022	6e-05	-0.0001
0.48	6e-05	-0.00035	-6e-05	0.00013
0.72	0.00018	-0.00021	0.00019	0.00033
0.96	0.00017	0.00016	0	-0.0001
1.2	3e-05	-0.00034	0.0002	-0.00012
1.44	0.00021	-0.00011	5e-05	0.00015
1.68	-0.00034	0.00022	8e-05	0.00016
1.92	0.00028	-0.0003	0.00025	-0.00017
2.16	-0.00015	-0.0001	0.0002	-0.0001
2.4	1e-05	-0.00025	0.0002	2e-05
2.64	0.00018	0.00017	-2e-05	-3e-05
2.88	2e-05	0.00014	-0.00016	0.00021
3.12	-0.00039	7e-05	2e-05	0.00017
3.36	0.00013	0.00024	2e-05	7e-05
3.6	9e-05	-0.00019	0.0001	0.00022
3.84	-1e-05	-0.00011	8e-05	0.00013
4.08	-9e-05	3e-05	0.00016	0.00021
4.32	-6e-05	-5e-05	-0.0001	2e-05
4.56	-0.0001	0.00017	0.00017	7e-05
4.8	1e-05	-2e-05	-0.0002	-0.0001
5.04	8e-05	5e-05	-2e-05	0.00013
5.28	0.00024	-0.00011	0.00022	6e-05
5.52	5e-05	-0.00011	-2e-05	-1e-05
5.76	-2e-05	-3e-05	0.00021	6e-05
6	0.00029	-0.00029	0.00014	-0.00013
6.24	8e-05	0	0.0001	0.00013
6.48	-0.0002	0.00016	0.00021	-3e-05
6.72	-0.00021	0.00034	6e-05	0.00041
6.96	0.00011	8e-05	-4e-05	-0.00013
7.2	0.00014	0.00024	0.0002	-3e-05
7.44	0.00035	-3e-05	0.0001	0.00014
7.68	2e-05	-0.00027	-5e-05	2e-05
7.92	6e-05	4e-05	6e-05	7e-05
8.16	-5e-05	-0.00026	0.00022	0.00018
8.4	-0.00032	-0.00032	-8e-05	4e-05
8.64	-0.00028	-9e-05	0.00023	1e-05
8.88	-0.00017	-4e-05	-0.00012	-1e-05
9.12	0.00016	-0.00015	-0.00013	1e-05
9.36	-6e-05	1e-05	-1e-05	-1e-05
9.6	-0.00025	0.00011	3e-05	8e-05
9.84	9e-05	-3e-05	1e-05	0.00029
10.08	7e-05	-0.00023	5e-05	7e-05
10.32	-2e-05	-9e-05	3e-05	6e-05
10.56	4e-05	-8e-05	2e-05	-0.00016
10.8	0.00019	2e-05	-0.00012	0.0002
11.04	-0.00014	-9e-05	-0.00024	-8e-05
11.28	1e-05	-8e-05	-6e-05	-0.00017
11.52	-1e-05	0.00032	0.00013	9e-05
11.76	-0.00011	-9e-05	0.0001	-0.00011
12	-2e-05	4e-05	-3e-05	7e-05
12.24	1e-05	-0.00017	4e-05	-0.00013
12.48	-1e-05	-0.00016	-0.00012	9e-05
12.72	3e-05	-0.00017	-1e-05	-9e-05
12.96	-7e-05	0.00015	0.00014	0.00025
13.2	-0.00018	-0.00014	-0.00029	4e-05
13.44	2e-05	0.00013	-3e-05	0
13.68	-0.00018	-2e-05	0.00015	1e-05
13.92	0.00014	-4e-05	0	0.00011
14.16	-0.0001	-0.00034	-0.00028	-9e-05
14.4	-0.00029	0.00023	0	2e-05
14.64	0.00025	5e-05	4e-05	7e-05
14.88	-0.0001	0.0002	0.0002	0.00031
15.12	0.00022	0.00021	0.00011	1e-05
15.36	0.00014	0.00021	-9e-05	0.00011
15.6	-0.0001	7e-05	-0.0003	0.00012
15.84	3e-05	-1e-05	-3e-05	3e-05
16.08	5e-05	-2e-05	5e-05	0
16.32	0.00015	0.0001	3e-05	-0.00011
16.56	1e-05	7e-05	0	-5e-05
16.8	1e-05	-0.00012	-0.00019	-0.00022
17.04	0.00024	-0.00012	-0.00017	-3e-05
17.28	1e-05	0.00017	0	-5e-05
17.52	-0.00032	0.00027	8e-05	-0.0001
17.76	-0.00017	-0.0001	-4e-05	-6e-05
18	-0.00014	0.00015	0	7e-05
18.24	-1e-05	0.00025	-0.00012	-0.00026
18.48	0.00022	-0.00029	-8e-05	-0.00012
18.72	-0.00022	0.00022	-1e-05	-6e-05
18.96	-6e-05	4e-05	0.00012	-0.00026
19.2	-4e-05	-0.00032	-0.00023	0.00011
19.44	-0.00011	-0.00013	0.00012	-0.0003
19.68	-1e-05	-0.00015	-8e-05	-1e-05
19.92	4e-05	0.00018	-0.00011	3e-05
20.16	-3e-05	0.00015	-0.00013	-9e-05
20.4	-0.00033	0.00027	7e-05	-0.00014
20.64	-0.00017	0.00024	0.00026	5e-05
20.88	0.0005	-0.00016	-0.00012	-9e-05
21.12	2e-05	0.00027	-0.0002	-0.00011
21.36	0.00015	-2e-05	-8e-05	0.00022
21.6	0.0001	2e-05	-0.00011	3e-05
21.84	0.0001	-0.00026	0.00019	0
22.08	3e-05	0.00012	5e-05	-0.00016
22.32	-1e-05	8e-05	-0.0002	-0.00015
22.56	-0.00012	-0.00019	-9e-05	-0.00011
22.8	-4e-05	8e-05	-0.00017	-0.00057
23.04	0.00018	6e-05	0.00012	5e-05
23.28	3e-05	-0.0003	2e-05	0.00012
23.52	0.00011	-0.00028	-8e-05	-0.00019
23.76	5e-05	-0.00016	0.00012	1e-05
24	-0.00019	-1e-05	-4e-05	-2e-05
24.24	3e-05	3e-05	0.0001	-0.00016
24.48	-6e-05	0.00015	0.00012	7e-05
24.72	-2e-05	0.00029	4e-05	-0.00016
24.96	0.00046	9e-05	-8e-05	-0.00019
25.2	-0.00026	0.00017	-6e-05	-0.00033
25.44	-4e-05	1e-05	-6e-05	-1e-05
25.68	-9e-05	9e-05	0.00021	0.00019
25.92	-1e-05	0.00011	-0.00019	-0.0001
26.16	-4e-05	7e-05	-0.00022	-0.00025
26.4	-4e-05	5e-05	-0.00013	0.00028
26.64	-0.00014	-1e-05	-7e-05	-0.0002
26.88	0.0002	5e-05	1e-05	0.00028
27.12	6e-05	-0.00011	-0.00016	0.00012
27.36	-1e-05	4e-05	4e-05	-0.00015
27.6	-0.00018	-0.00021	-0.0001	-3e-05
27.84	-0.00012	8e-05	-8e-05	-3e-05
28.08	0.00014	2e-05	-0.00011	9e-05
28.32	4e-05	-5e-05	-7e-05	-0.00014
28.56	9e-05	0.00012	-9e-05	-0.00024
28.8	-9e-05	0.00033	-0.0003	7e-05
29.04	1e-05	0.0001	1e-05	-8e-05
29.28	-9e-05	0.00027	-3e-05	2e-05
29.52	-0.0002	-9e-05	-0.00015	-0.00011
29.76	-9e-05	0.00017	-0.00013	-9e-05
30	0.00023	3e-05	0.00032	0.00013
30.24	0.00026	0.00017	0.00048	0.00048
30.48	0.00037	0.00034	0.00057	0.00086
30.72	-0.00954	-0.01019	-0.00909	-0.00926
30.96	-0.05574	-0.06117	-0.05439	-0.05789
31.2	0.02456	0.02603	0.02191	0.02466
31.44	-0.01804	-0.01964	-0.01735	-0.01814
31.68	0.00134	0.00161	0.00173	0.00212
31.92	0.00114	0.00157	0.00125	0.00208
32.16	0.00123	0.00152	0.00161	0.00221
32.4	0.00138	0.00183	0.00168	0.00259
32.64	0.00151	0.00201	0.00205	0.0028
32.88	0.00179	0.00242	0.00202	0.00284
33.12	0.00169	0.00228	0.00202	0.00296
33.36	0.00178	0.00255	0.00216	0.00323
33.6	0.002	0.00241	0.00207	0.00343
33.84	0.00216	0.00243	0.0024	0.00352
34.08	0.00216	0.00308	0.00234	0.00321
34.32	0.00226	0.00265	0.00222	0.00385
34.56	0.00244	0.00264	0.0024	0.00359
34.8	0.00266	0.00281	0.00276	0.00376
35.04	0.0023	0.0036	0.00276	0.00402
35.28	0.00268	0.00326	0.00259	0.00394
35.52	0.0029	0.00301	0.00273	0.00417
35.76	0.00268	0.003	0.00299	0.00416
36	0.00282	0.00316	0.00294	0.00424
36.24	0.00281	0.0033	0.00318	0.0042
36.48	0.00288	0.00331	0.00305	0.00418
36.72	0.00291	0.00327	0.00311	0.0041
36.96	0.00262	0.00385	0.00325	0.00463
37.2	0.00309	0.00335	0.00347	0.00427
37.44	0.00337	0.00394	0.0033	0.00434
37.68	0.00323	0.00336	0.00339	0.00427
37.92	0.00349	0.00395	0.00323	0.00453
38.16	0.00332	0.00377	0.00341	0.00465
38.4	0.00357	0.00359	0.00355	0.00457
38.64	0.00347	0.00364	0.00335	0.00486
38.88	0.00358	0.0037	0.00338	0.0048
39.12	0.00375	0.00389	0.00334	0.0049
39.36	0.00338	0.00372	0.00336	0.0046
39.6	0.00373	0.00397	0.00337	0.00505
39.84	0.00373	0.00405	0.00349	0.00467
40.08	0.00368	0.00382	0.00359	0.00498
40.32	0.0037	0.00406	0.00359	0.00507
40.56	0.00367	0.00444	0.00377	0.00513
40.8	0.00341	0.00447	0.00364	0.00507
41.04	0.00433	0.00415	0.00366	0.00515
41.28	0.00397	0.00425	0.0038	0.00491
41.52	0.00384	0.00427	0.00387	0.00494
41.76	0.00417	0.00426	0.00385	0.00527
42	0.00455	0.00403	0.00367	0.00514
42.24	0.00417	0.00406	0.00384	0.00516
42.48	0.00418	0.00403	0.00394	0.00524
42.72	0.00411	0.00438	0.00418	0.00529
42.96	0.00441	0.00421	0.00407	0.00533
43.2	0.00449	0.0044	0.00396	0.00525
43.44	0.00397	0.00469	0.00409	0.00532
43.68	0.0042	0.00433	0.00394	0.00537
43.92	0.00429	0.00438	0.00416	0.00521
44.16	0.00428	0.00426	0.00396	0.00549
44.4	0.00424	0.00478	0.00412	0.00564
44.64	0.0042	0.00444	0.00425	0.00569
44.88	0.0044	0.00454	0.00399	0.00555
45.12	0.00442	0.0046	0.00412	0.0058
45.36	0.0045	0.0045	0.00443	0.00574
45.6	0.0046	0.00467	0.00419	0.00545
45.84	0.00465	0.00476	0.00413	0.00578
46.08	0.00426	0.00445	0.00427	0.00555
46.32	0.00485	0.00469	0.00421	0.00557
46.56	0.00458	0.00469	0.00436	0.00573
46.8	0.00474	0.00473	0.00429	0.00601
47.04	0.0047	0.00448	0.00442	0.00577
47.28	0.00435	0.00462	0.00448	0.00602
47.52	0.00468	0.00477	0.0044	0.00574
47.76	0.00446	0.00468	0.00453	0.0058
48	0.00461	0.00496	0.00444	0.00598
48.24	0.00505	0.00496	0.0045	0.00595
48.48	0.00465	0.00457	0.00463	0.00583
48.72	0.00469	0.00474	0.00427	0.00573
48.96	0.00475	0.00472	0.00426	0.00574
49.2	0.00471	0.00463	0.00444	0.00613
49.44	0.00513	0.00483	0.00441	0.00611
49.68	0.00497	0.00457	0.00437	0.006
49.92	0.00475	0.00481	0.00456	0.00614
50.16	0.005	0.00506	0.00467	0.00593
50.4	0.00497	0.00495	0.00439	0.00608
50.64	0.00501	0.00499	0.0045	0.00625
50.88	0.00471	0.00513	0.00454	0.00591
51.12	0.00515	0.00448	0.00459	0.00606
51.36	0.00532	0.00509	0.00472	0.00617
51.6	0.00492	0.00482	0.00468	0.00624
51.84	0.00521	0.00504	0.00456	0.00637
52.08	0.0054	0.00471	0.00453	0.00654
52.32	0.00502	0.0049	0.00458	0.00609
52.56	0.00521	0.005	0.00466	0.00602
52.8	0.00521	0.00466	0.0045	0.00615
53.04	0.00532	0.00502	0.00471	0.00626
53.28	0.00516	0.0052	0.00477	0.00632
53.52	0.00542	0.00488	0.00479	0.00633
53.76	0.0052	0.0049	0.00466	0.00632
54	0.00543	0.00519	0.00474	0.00624
54.24	0.00536	0.00526	0.00473	0.00636
54.48	0.00534	0.00534	0.00478	0.0061
54.72	0.00529	0.00498	0.00461	0.00632
54.96	0.00555	0.00484	0.00492	0.00651
55.2	0.00554	0.00517	0.00498	0.0064
55.44	0.00525	0.00541	0.00486	0.00622
55.68	0.00542	0.00534	0.00494	0.00639
55.92	0.00558	0.00552	0.00492	0.00648
56.16	0.00569	0.00476	0.00475	0.00623
56.4	0.00517	0.00507	0.00493	0.00618
56.64	0.00535	0.00524	0.00483	0.00641
56.88	0.00569	0.00483	0.00503	0.00663
57.12	0.00534	0.00549	0.00487	0.00657
57.36	0.00567	0.00513	0.00488	0.00656
57.6	0.0056	0.0052	0.00477	0.00637
57.84	0.00517	0.00522	0.0047	0.00633
58.08	0.00552	0.00531	0.00502	0.00641
58.32	0.00543	0.00523	0.00494	0.00648
58.56	0.00579	0.00538	0.00498	0.00643
58.8	0.00571	0.00496	0.00508	0.00633
59.04	0.00565	0.00538	0.005	0.00636
59.28	0.00573	0.00544	0.00489	0.00661
59.52	0.00569	0.00518	0.00497	0.00647
59.76	0.00564	0.00524	0.0049	0.00664
60	0.00585	0.0054	0.00505	0.00677
60.24	0.00576	0.00539	0.00467	0.00663
60.48	0.00568	0.00541	0.00486	0.00642
60.72	0.00565	0.00537	0.0049	0.00643
60.96	0.00559	0.00554	0.00493	0.00633
61.2	0.00578	0.00554	0.00496	0.00686
61.44	0.00583	0.0054	0.00502	0.00667
61.68	0.00567	0.00514	0.00513	0.00656
61.92	0.00578	0.00531	0.00513	0.00681
62.16	0.00584	0.0054	0.00488	0.00674
62.4	0.00574	0.00562	0.00487	0.00667
62.64	0.00602	0.00526	0.00489	0.0067
62.88	0.00568	0.00535	0.0049	0.00662
63.12	0.00556	0.00563	0.00503	0.00669
63.36	0.00623	0.00533	0.00509	0.00681
63.6	0.00568	0.00549	0.00522	0.00684
63.84	0.00587	0.00532	0.00508	0.00657
64.08	0.0059	0.00553	0.00497	0.00667
64.32	0.00595	0.00557	0.00495	0.00648
64.56	0.00588	0.00558	0.00501	0.00665
64.8	0.00617	0.00576	0.00521	0.00631
65.04	0.00582	0.00555	0.00483	0.00696
65.28	0.00589	0.00582	0.00512	0.0066
65.52	0.00596	0.00526	0.00502	0.00656
65.76	0.00606	0.00542	0.00496	0.00708
66	0.00608	0.00525	0.00489	0.00662
66.24	0.00562	0.00553	0.00519	0.00677
66.48	0.00588	0.00558	0.00526	0.00668
66.72	0.00627	0.00571	0.00522	0.00649
66.96	0.00608	0.00561	0.00528	0.00678
67.2	0.00578	0.00557	0.00511	0.00645
67.44	0.00616	0.00561	0.00516	0.00676
67.68	0.00583	0.00565	0.00531	0.00666
67.92	0.00589	0.00569	0.00529	0.00692
68.16	0.00615	0.00581	0.00506	0.0067
68.4	0.00605	0.00584	0.00533	0.00695
68.64	0.00591	0.00572	0.00537	0.00686
68.88	0.00578	0.00576	0.0053	0.00668
69.12	0.00568	0.00588	0.00495	0.0067
69.36	0.00604	0.0055	0.00517	0.00699
69.6	0.00631	0.00564	0.00523	0.00671
69.84	0.00605	0.0058	0.00537	0.00691
70.08	0.00592	0.00589	0.0051	0.00678
70.32	0.00608	0.00567	0.00515	0.00705
70.56	0.00602	0.0057	0.00532	0.00695
70.8	0.00604	0.00555	0.00488	0.00656
71.04	0.00602	0.00603	0.00516	0.00691
71.28	0.00628	0.00562	0.00519	0.00681
71.52	0.00588	0.00585	0.00532	0.00687
71.76	0.00638	0.00566	0.00559	0.00683
72	0.00615	0.00563	0.00521	0.00696
72.24	0.00606	0.00581	0.00532	0.00663
72.48	0.00642	0.00572	0.00528	0.00679
72.72	0.00649	0.00566	0.00507	0.00708
72.96	0.00633	0.00577	0.005	0.00699
73.2	0.00598	0.00583	0.0051	0.00671
73.44	0.00603	0.00597	0.00533	0.0071
73.68	0.00631	0.00586	0.00511	0.00726
73.92	0.00629	0.00539	0.00517	0.00684
74.16	0.00651	0.00567	0.00533	0.00695
74.4	0.0063	0.00582	0.00553	0.00678
74.64	0.00643	0.00594	0.00539	0.00688
74.88	0.00606	0.00581	0.00524	0.00691
75.12	0.00664	0.00584	0.00524	0.00692
75.36	0.00617	0.00584	0.00525	0.00696
75.6	0.00609	0.00571	0.00519	0.0072
75.84	0.00629	0.00605	0.00532	0.00686
76.08	0.00594	0.0056	0.00525	0.00686
76.32	0.00643	0.0062	0.00533	0.00713
76.56	0.00652	0.00577	0.00548	0.00656
76.8	0.00616	0.00565	0.00513	0.00673
77.04	0.00659	0.00586	0.00553	0.00713
77.28	0.00641	0.00569	0.00537	0.00732
77.52	0.0066	0.00565	0.00557	0.007
77.76	0.00639	0.00599	0.00544	0.00692
78	0.00607	0.00612	0.00536	0.007
78.24	0.00628	0.00591	0.00538	0.00735
78.48	0.0066	0.0059	0.00535	0.00693
78.72	0.00651	0.00604	0.0052	0.00709
78.96	0.00655	0.00592	0.00531	0.00695
79.2	0.00642	0.00588	0.00528	0.00716
79.44	0.00627	0.00601	0.00531	0.00673
79.68	0.00638	0.00589	0.00522	0.00718
79.92	0.0066	0.00597	0.00532	0.00717
80.16	0.00655	0.00586	0.00519	0.00717
80.4	0.00634	0.00608	0.00543	0.00699
80.64	0.00629	0.00614	0.00533	0.00673
80.88	0.00658	0.00597	0.00524	0.00717
81.12	0.00647	0.00591	0.00533	0.00665
81.36	0.00646	0.00602	0.00565	0.00725
81.6	0.00654	0.00578	0.00525	0.00695
81.84	0.00666	0.00575	0.00566	0.00718
82.08	0.00645	0.00619	0.00534	0.00699
82.32	0.00638	0.00635	0.00537	0.00711
82.56	0.00642	0.00579	0.00541	0.00699
82.8	0.00649	0.00604	0.00527	0.00701
83.04	0.00667	0.00612	0.00528	0.00731
83.28	0.00663	0.00579	0.00548	0.00714
83.52	0.00668	0.0059	0.00543	0.00692
83.76	0.00655	0.00623	0.0057	0.00723
84	0.00662	0.00628	0.00574	0.0071
84.24	0.00682	0.00648	0.00521	0.00677
84.48	0.00636	0.00587	0.00542	0.00714
84.72	0.00659	0.00646	0.00543	0.00702
84.96	0.00642	0.00587	0.00546	0.00709
85.2	0.00636	0.00616	0.00552	0.00693
85.44	0.00651	0.00613	0.00532	0.0068
85.68	0.00673	0.00612	0.00533	0.00691
85.92	0.0064	0.00622	0.00552	0.00712
86.16	0.0067	0.00626	0.00536	0.00705
86.4	0.00657	0.00634	0.00552	0.00732
86.64	0.00683	0.00651	0.00544	0.0072
86.88	0.00696	0.00596	0.00545	0.00707
87.12	0.00642	0.00616	0.00539	0.00683
87.36	0.00672	0.00622	0.00527	0.00726
87.6	0.00673	0.00622	0.00528	0.00719
87.84	0.00684	0.00606	0.00548	0.00686
88.08	0.00672	0.00616	0.00554	0.00689
88.32	0.0066	0.00638	0.00544	0.00717
88.56	0.00667	0.00635	0.00552	0.00718
88.8	0.00635	0.00617	0.00551	0.00721
89.04	0.00667	0.00654	0.00533	0.00719
89.28	0.0067	0.00608	0.00536	0.00706
89.52	0.00683	0.00621	0.00531	0.00697
89.76	0.00645	0.00624	0.00562	0.00667
90	0.00665	0.00639	0.00553	0.00704
90.24	0.00638	0.00664	0.00563	0.00699
90.48	0.00671	0.00625	0.0055	0.0072
90.72	0.00652	0.00639	0.00555	0.00734
90.96	0.00679	0.00645	0.00546	0.00718
91.2	0.00654	0.00622	0.00574	0.00707
91.44	0.00669	0.00596	0.00557	0.00726
91.68	0.00683	0.00618	0.00553	0.00709
91.92	0.00687	0.00621	0.0054	0.00722
92.16	0.00684	0.00646	0.00553	0.00737
92.4	0.00699	0.00615	0.00542	0.00717
92.64	0.0067	0.00633	0.00557	0.00722
92.88	0.00694	0.00602	0.00552	0.00693
93.12	0.00673	0.00627	0.0055	0.00713
93.36	0.00699	0.0065	0.00553	0.00737
93.6	0.00681	0.00624	0.00564	0.00701
93.84	0.00675	0.0061	0.00564	0.00723
94.08	0.00696	0.00624	0.00541	0.00704
94.32	0.00686	0.00632	0.00543	0.00733
94.56	0.00674	0.00656	0.00534	0.00698
94.8	0.00668	0.00633	0.00552	0.00711
95.04	0.00682	0.00634	0.00544	0.0071
95.28	0.00681	0.0064	0.00562	0.00717
95.52	0.00708	0.00633	0.00551	0.00707
95.76	0.00668	0.00636	0.00568	0.00715
96	0.00683	0.00643	0.00546	0.00726
96.24	0.00655	0.0066	0.00529	0.00706
96.48	0.00687	0.00615	0.00568	0.00718
96.72	0.00675	0.00633	0.00536	0.00725
96.96	0.00678	0.00652	0.00541	0.00719
97.2	0.00693	0.00639	0.00559	0.00734
97.44	0.00676	0.00625	0.00568	0.00692
97.68	0.00667	0.00617	0.00575	0.00703
97.92	0.00694	0.00661	0.00546	0.00733
98.16	0.0071	0.00663	0.00552	0.00728
98.4	0.00682	0.00643	0.0055	0.00691
98.64	0.00678	0.00654	0.00541	0.00714
98.88	0.00681	0.00627	0.00568	0.0071
99.12	0.00681	0.00628	0.00559	0.00714
99.36	0.007	0.00644	0.00549	0.00722
99.6	0.0071	0.00638	0.00526	0.00695
99.84	0.00661	0.00644	0.00531	0.00697
100.08	0.00663	0.00637	0.00545	0.00728
100.32	0.00662	0.00656	0.00545	0.00706
100.56	0.00666	0.00659	0.00559	0.007
100.8	0.00686	0.00683	0.0055	0.00706
101.04	0.00686	0.00643	0.00568	0.00688
101.28	0.00678	0.0066	0.0057	0.00709
101.52	0.00676	0.00664	0.00531	0.00735
101.76	0.00676	0.00654	0.00559	0.00719
102	0.00688	0.00673	0.00576	0.00745
102.24	0.007	0.00659	0.0056	0.00703
102.48	0.00683	0.00635	0.00552	0.00717
102.72	0.00691	0.0069	0.00524	0.00725
102.96	0.007	0.00686	0.00549	0.00721
103.2	0.00702	0.00631	0.00558	0.00716
103.44	0.00699	0.00652	0.00555	0.00728
103.68	0.00699	0.00654	0.00568	0.0072
103.92	0.00704	0.00665	0.00543	0.00734
104.16	0.00683	0.00657	0.0054	0.00691
104.4	0.00693	0.00676	0.00553	0.00728
104.64	0.00698	0.0065	0.00554	0.00731
104.88	0.00741	0.00676	0.00554	0.00692
105.12	0.00673	0.00679	0.00567	0.00748
105.36	0.00705	0.00663	0.00557	0.00713
105.6	0.00676	0.0066	0.0058	0.00718
105.84	0.00682	0.00638	0.0056	0.00702
106.08	0.0072	0.00648	0.00567	0.00711
106.32	0.00663	0.00647	0.00572	0.00696
106.56	0.00683	0.00658	0.00533	0.00759
106.8	0.00699	0.00664	0.00536	0.00702
107.04	0.00673	0.00693	0.00564	0.00703
107.28	0.00707	0.00625	0.00553	0.00701
107.52	0.00694	0.0068	0.0057	0.00696
107.76	0.00694	0.0067	0.00562	0.00694
108	0.00715	0.00685	0.00563	0.00722
108.24	0.00699	0.0064	0.00555	0.00715
108.48	0.00706	0.00642	0.00566	0.00716
108.72	0.0068	0.00647	0.00542	0.00728
108.96	0.00716	0.00667	0.00588	0.00709
109.2	0.00699	0.00641	0.00549	0.00703
109.44	0.00702	0.00654	0.00557	0.00751
109.68	0.00711	0.00688	0.00565	0.00752
109.92	0.00685	0.00661	0.00567	0.00715
110.16	0.00707	0.00649	0.00564	0.00739
110.4	0.00707	0.0065	0.00551	0.00676
110.64	0.00729	0.0067	0.00563	0.007
110.88	0.00704	0.00655	0.0056	0.00712
111.12	0.00711	0.00671	0.00574	0.00712
111.36	0.007	0.00709	0.00579	0.00731
111.6	0.00724	0.00664	0.00585	0.00725
111.84	0.00712	0.00694	0.00559	0.00696
112.08	0.00716	0.00658	0.00549	0.00729
112.32	0.00695	0.00655	0.00556	0.00719
112.56	0.00715	0.00687	0.00557	0.00723
112.8	0.00701	0.00653	0.0055	0.00743
113.04	0.00705	0.00662	0.00558	0.00727
113.28	0.00703	0.00674	0.00556	0.00711
113.52	0.00697	0.00669	0.00551	0.00714
113.76	0.00706	0.00682	0.00589	0.00724
114	0.0072	0.00663	0.00545	0.00719
114.24	0.00678	0.00628	0.0056	0.00724
114.48	0.00704	0.0066	0.0056	0.00699
114.72	0.00678	0.00662	0.00568	0.00706
114.96	0.00712	0.00675	0.00569	0.00717
115.2	0.00693	0.00671	0.00572	0.00724
115.44	0.00672	0.0067	0.00547	0.00716
115.68	0.00715	0.00669	0.00559	0.00719
115.92	0.00727	0.00652	0.00557	0.00731
116.16	0.00694	0.00701	0.00554	0.00745
116.4	0.00737	0.0066	0.00567	0.00738
116.64	0.00714	0.00662	0.0055	0.00741
116.88	0.00715	0.00688	0.00541	0.00711
117.12	0.00722	0.00681	0.00558	0.00719
117.36	0.00709	0.00661	0.00554	0.00706
117.6	0.00709	0.00656	0.0055	0.00702
117.84	0.00723	0.00706	0.00552	0.00744
118.08	0.00707	0.00664	0.00562	0.00713
118.32	0.0071	0.00691	0.00559	0.00717
118.56	0.00706	0.00654	0.00556	0.00728
118.8	0.00709	0.00688	0.00552	0.00709
119.04	0.00699	0.00681	0.00562	0.00728
119.28	0.00723	0.00703	0.00571	0.00731
119.52	0.00723	0.00701	0.00566	0.00734
119.76	0.00732	0.00673	0.00575	0.00734
120	0.00725	0.00665	0.00542	0.00731
120.24	0.00709	0.00656	0.00563	0.0074
120.48	0.00707	0.0067	0.00568	0.00724
120.72	0.00697	0.00688	0.00554	0.0074
120.96	0.00713	0.00674	0.00564	0.00724
121.2	0.00719	0.00675	0.00566	0.00712
121.44	0.00722	0.00684	0.00549	0.00689
121.68	0.00692	0.00653	0.00563	0.00715
121.92	0.00712	0.00722	0.00594	0.00718
122.16	0.00677	0.00683	0.00562	0.0073
122.4	0.0071	0.00665	0.00558	0.0073
122.64	0.00718	0.00692	0.00554	0.00707
122.88	0.00721	0.00692	0.0059	0.007
123.12	0.00699	0.00693	0.00575	0.00734
123.36	0.00736	0.00672	0.0057	0.007
123.6	0.00722	0.00706	0.0055	0.00747
123.84	0.00737	0.00703	0.00582	0.0072
124.08	0.00724	0.00689	0.00585	0.00723
124.32	0.00739	0.00694	0.00545	0.00744
124.56	0.00743	0.00675	0.0054	0.00721
124.8	0.00733	0.00698	0.00571	0.00727
125.04	0.00741	0.00678	0.00565	0.00689
125.28	0.00749	0.00706	0.00584	0.00723
125.52	0.00731	0.00697	0.0057	0.00717
125.76	0.00743	0.00689	0.00547	0.0073
126	0.00752	0.00715	0.00563	0.00704
126.24	0.00705	0.00715	0.00582	0.00724
126.48	0.00749	0.00701	0.00539	0.00704
126.72	0.00716	0.00675	0.00554	0.00729
126.96	0.00701	0.00694	0.00581	0.00716
127.2	0.00742	0.00697	0.00579	0.00714
127.44	0.00703	0.00689	0.0057	0.00711
127.68	0.00727	0.00662	0.00546	0.00714
127.92	0.00729	0.00694	0.00553	0.007
128.16	0.00724	0.00664	0.00563	0.0073
128.4	0.00713	0.00705	0.00559	0.0073
128.64	0.00737	0.00676	0.00569	0.00703
128.88	0.00747	0.00733	0.00562	0.00713
129.12	0.00753	0.00685	0.00542	0.00677
129.36	0.00737	0.0066	0.0057	0.00721
129.6	0.00717	0.00691	0.00584	0.00745
129.84	0.00735	0.0068	0.0055	0.00719
130.08	0.00725	0.00745	0.00592	0.00703
130.32	0.00735	0.00694	0.00578	0.00724
130.56	0.00718	0.00683	0.00589	0.00721
130.8	0.00765	0.00694	0.00544	0.00705
131.04	0.00733	0.00673	0.00542	0.00711
131.28	0.00737	0.00708	0.00568	0.00708
131.52	0.00722	0.00697	0.00555	0.00721
131.76	0.0072	0.00718	0.00551	0.00675
132	0.0073	0.00696	0.00548	0.00728
132.24	0.00744	0.00707	0.00553	0.00736
132.48	0.00718	0.00753	0.00566	0.00704
132.72	0.00737	0.0072	0.00563	0.00712
132.96	0.00732	0.00683	0.00545	0.00737
133.2	0.0072	0.00702	0.00555	0.00721
133.44	0.00727	0.00748	0.00573	0.00734
133.68	0.00718	0.00723	0.00577	0.00709
133.92	0.00692	0.00697	0.00548	0.00722
134.16	0.00734	0.0071	0.00562	0.00735
134.4	0.00721	0.00729	0.0056	0.00731
134.64	0.00725	0.00721	0.00577	0.00711
134.88	0.00703	0.00694	0.00536	0.00703
135.12	0.00729	0.00724	0.00585	0.00721
135.36	0.00762	0.00709	0.00543	0.00749
135.6	0.0074	0.00696	0.00578	0.00714
135.84	0.00738	0.00721	0.00562	0.00721
136.08	0.00733	0.00724	0.00567	0.00698
136.32	0.00731	0.00704	0.00547	0.00736
136.56	0.00742	0.00696	0.00551	0.00741
136.8	0.00723	0.00712	0.00561	0.00705
137.04	0.00732	0.0069	0.00561	0.00735
137.28	0.0072	0.00706	0.0057	0.00734
137.52	0.00739	0.0071	0.0055	0.00735
137.76	0.00768	0.00695	0.00559	0.00724
138	0.00741	0.00717	0.0057	0.00684
138.24	0.00738	0.00686	0.00569	0.00712
138.48	0.00737	0.0072	0.00565	0.00734
138.72	0.00748	0.0071	0.00554	0.00718
138.96	0.00749	0.00732	0.00565	0.00696
139.2	0.00732	0.00712	0.00539	0.00714
139.44	0.00727	0.00686	0.00559	0.00701
139.68	0.00751	0.00688	0.00559	0.00717
139.92	0.00716	0.00705	0.00548	0.00738
140.16	0.00757	0.00692	0.00558	0.00714
140.4	0.0074	0.00725	0.00558	0.00739
140.64	0.00749	0.00709	0.00546	0.0074
140.88	0.00731	0.00698	0.0055	0.00725
141.12	0.00738	0.00704	0.00572	0.00706
141.36	0.00765	0.00709	0.00565	0.00719
141.6	0.00734	0.0071	0.00568	0.00743
141.84	0.0075	0.00718	0.00576	0.00721
142.08	0.00749	0.00737	0.00558	0.00683
142.32	0.00759	0.00694	0.00559	0.00729
142.56	0.00739	0.00721	0.00577	0.00711
142.8	0.00726	0.00741	0.00563	0.00695
143.04	0.00748	0.00716	0.00545	0.00712
143.28	0.00734	0.00698	0.00551	0.00711
143.52	0.00731	0.00726	0.00554	0.00756
143.76	0.0072	0.00711	0.00549	0.00688
144	0.00738	0.00739	0.0059	0.00722
144.24	0.00765	0.00697	0.00547	0.00705
144.48	0.00754	0.00743	0.00539	0.00751
144.72	0.00735	0.00696	0.00543	0.00719
144.96	0.00739	0.00713	0.00574	0.00729
145.2	0.00749	0.00713	0.00547	0.00721
145.44	0.00739	0.00728	0.00546	0.00711
145.68	0.00725	0.00725	0.00562	0.00712
145.92	0.00734	0.00698	0.00557	0.00701
146.16	0.00759	0.00718	0.00576	0.00692
146.4	0.00735	0.00735	0.00567	0.00733
146.64	0.0076	0.00724	0.00565	0.00699
146.88	0.0077	0.00702	0.00564	0.00712
147.12	0.00711	0.00723	0.00552	0.00699
147.36	0.00736	0.00744	0.00576	0.00711
147.6	0.00758	0.00723	0.00566	0.00707
147.84	0.00732	0.00704	0.00571	0.00712
148.08	0.0075	0.0073	0.00557	0.00718
148.32	0.00747	0.00709	0.00587	0.00733
148.56	0.00762	0.00743	0.00564	0.00703
148.8	0.00764	0.00742	0.00555	0.00716
149.04	0.00719	0.007	0.00555	0.0072
149.28	0.00751	0.00722	0.00547	0.00714
149.52	0.00732	0.00734	0.00555	0.00724
149.76	0.00727	0.00738	0.00537	0.00697
150	0.00748	0.00716	0.00556	0.00744
150.24	0.00786	0.00783	0.0057	0.00778
150.48	0.00833	0.00818	0.00576	0.00783
150.72	-0.00409	-0.00451	-0.00531	-0.00438
150.96	-0.05151	-0.05697	-0.05184	-0.05456
151.2	0.03516	0.03716	0.02877	0.03304
151.44	-0.01153	-0.0129	-0.01341	-0.0133
151.68	0.00944	0.00976	0.00678	0.00861
151.92	0.00914	0.00986	0.00677	0.00868
152.16	0.00983	0.00998	0.0067	0.00896
152.4	0.00981	0.00984	0.00671	0.00873
152.64	0.00976	0.01046	0.00689	0.00902
152.88	0.01011	0.01049	0.00691	0.00886
153.12	0.01028	0.01047	0.00691	0.00925
153.36	0.01041	0.01085	0.007	0.00877
153.6	0.01037	0.01077	0.00724	0.00933
153.84	0.01073	0.01042	0.00712	0.0092
154.08	0.01058	0.01096	0.00735	0.00909
154.32	0.01074	0.0114	0.00725	0.0095
154.56	0.01092	0.01086	0.00708	0.00967
154.8	0.01113	0.01103	0.00724	0.0093
155.04	0.01085	0.01122	0.00725	0.00989
155.28	0.01086	0.0113	0.00733	0.00959
155.52	0.011	0.01151	0.00737	0.00987
155.76	0.01132	0.01162	0.00729	0.00972
156	0.01122	0.01157	0.00753	0.00982
156.24	0.01136	0.01187	0.00737	0.00953
156.48	0.01149	0.01156	0.00758	0.00967
156.72	0.01161	0.01171	0.00758	0.00983
156.96	0.0115	0.01196	0.00728	0.00979
157.2	0.01138	0.01201	0.0076	0.0098
157.44	0.01137	0.01168	0.00757	0.00997
157.68	0.01159	0.01187	0.00761	0.00994
157.92	0.01167	0.01196	0.00772	0.0099
158.16	0.012	0.01223	0.00767	0.00983
158.4	0.01193	0.01248	0.00778	0.01003
158.64	0.01176	0.01197	0.00787	0.00996
158.88	0.01213	0.01219	0.00786	0.00986
159.12	0.012	0.01208	0.00767	0.01
159.36	0.01173	0.01254	0.00774	0.01012
159.6	0.01189	0.012	0.0078	0.0099
159.84	0.01209	0.01209	0.00778	0.0102
160.08	0.01226	0.0124	0.0078	0.01005
160.32	0.01228	0.01224	0.00801	0.00999
160.56	0.01208	0.01261	0.00775	0.01026
160.8	0.01236	0.0125	0.00775	0.01014
161.04	0.01232	0.0125	0.00783	0.01015
161.28	0.01213	0.01242	0.00786	0.01021
161.52	0.01256	0.01259	0.00802	0.01042
161.76	0.01219	0.01274	0.00799	0.01047
162	0.01224	0.01241	0.00794	0.01041
162.24	0.01216	0.01267	0.00804	0.01038
162.48	0.01236	0.01242	0.00783	0.01022
162.72	0.01224	0.01216	0.00804	0.0104
162.96	0.01244	0.0125	0.00782	0.01069
163.2	0.01232	0.01272	0.00786	0.01043
163.44	0.0127	0.01262	0.00765	0.01043
163.68	0.01244	0.01237	0.00775	0.0104
163.92	0.01239	0.01294	0.00809	0.0103
164.16	0.0123	0.01284	0.00812	0.0103
164.4	0.01263	0.01272	0.00803	0.01077
164.64	0.01235	0.0128	0.00811	0.01071
164.88	0.01264	0.01312	0.0081	0.01052
165.12	0.01259	0.01325	0.00808	0.01053
165.36	0.0124	0.01323	0.00806	0.01068
165.6	0.01233	0.0131	0.00795	0.0107
165.84	0.0127	0.0129	0.00789	0.01064
166.08	0.01257	0.01276	0.00807	0.01058
166.32	0.01286	0.01329	0.00801	0.01035
166.56	0.01282	0.01264	0.00786	0.01033
166.8	0.01241	0.01266	0.00828	0.0107
167.04	0.01293	0.01273	0.00813	0.01047
167.28	0.01256	0.01315	0.00806	0.01063
167.52	0.01286	0.0129	0.00789	0.01065
167.76	0.01309	0.01309	0.00798	0.01079
168	0.01259	0.01339	0.00804	0.01076
168.24	0.01275	0.01307	0.00779	0.01082
168.48	0.01293	0.01318	0.00772	0.01084
168.72	0.01287	0.01296	0.00833	0.01041
168.96	0.01269	0.01276	0.00827	0.01045
169.2	0.01297	0.01303	0.00812	0.0107
169.44	0.01293	0.01313	0.00812	0.01044
169.68	0.01316	0.01345	0.00805	0.01064
169.92	0.01289	0.01335	0.00809	0.01053
170.16	0.013	0.01286	0.00818	0.01074
170.4	0.01319	0.01347	0.0082	0.01084
170.64	0.01296	0.0135	0.00821	0.01088
170.88	0.01282	0.01314	0.00797	0.01079
171.12	0.01282	0.0132	0.0082	0.01067
171.36	0.01312	0.01288	0.00809	0.01095
171.6	0.01287	0.01339	0.00798	0.01076
171.84	0.01309	0.01327	0.00795	0.01065
172.08	0.01308	0.01262	0.00797	0.01078
172.32	0.01281	0.01333	0.00841	0.01085
172.56	0.01283	0.01346	0.00788	0.01065
172.8	0.01276	0.01351	0.00822	0.0109
173.04	0.01348	0.01346	0.008	0.01042
173.28	0.01316	0.01355	0.00807	0.01057
173.52	0.01317	0.01321	0.00832	0.01046
173.76	0.01297	0.01292	0.00835	0.01066
174	0.01306	0.01334	0.00794	0.01078
174.24	0.01293	0.01337	0.00802	0.01051
174.48	0.01272	0.01381	0.0082	0.01062
174.72	0.01284	0.01307	0.00812	0.0109
174.96	0.01324	0.01308	0.00808	0.01096
175.2	0.01323	0.01301	0.00818	0.01082
175.44	0.01308	0.01351	0.00807	0.01099
175.68	0.01333	0.01377	0.00849	0.01037
175.92	0.01339	0.01346	0.00821	0.01075
176.16	0.01342	0.01388	0.0082	0.0107
176.4	0.01328	0.01359	0.008	0.01103
176.64	0.01312	0.01342	0.00819	0.01088
176.88	0.0136	0.01367	0.00821	0.01082
177.12	0.01318	0.01321	0.00823	0.01109
177.36	0.01317	0.01364	0.00818	0.0107
177.6	0.01315	0.01332	0.00816	0.01067
177.84	0.01319	0.01339	0.00808	0.0108
178.08	0.01308	0.01367	0.00821	0.01064
178.32	0.01345	0.01366	0.00821	0.01065
178.56	0.01335	0.01362	0.00816	0.01079
178.8	0.01309	0.01338	0.00834	0.01091
179.04	0.0133	0.01346	0.00826	0.01086
179.28	0.01292	0.0136	0.00818	0.01067
179.52	0.01352	0.01311	0.0082	0.01055
179.76	0.01338	0.01358	0.00823	0.01081
180	0.01324	0.01386	0.00805	0.01071
180.24	0.0132	0.01345	0.00811	0.01103
180.48	0.01329	0.01357	0.00824	0.01056
180.72	0.01328	0.01375	0.00813	0.01066
180.96	0.01315	0.01365	0.00784	0.01107
181.2	0.01348	0.01346	0.00838	0.0111
181.44	0.01352	0.01316	0.00838	0.01059
181.68	0.01348	0.01389	0.00809	0.01057
181.92	0.01344	0.01372	0.0083	0.01098
182.16	0.01313	0.0137	0.00817	0.01094
182.4	0.01348	0.0136	0.00823	0.01075
182.64	0.01329	0.01356	0.00827	0.01098
182.88	0.0133	0.01351	0.00824	0.01067
183.12	0.01325	0.01348	0.00803	0.01097
183.36	0.01339	0.01368	0.00832	0.01053
183.6	0.01337	0.01395	0.00851	0.01067
183.84	0.01367	0.01382	0.00828	0.01083
184.08	0.01344	0.0136	0.00826	0.01099
184.32	0.01352	0.0136	0.00817	0.01078
184.56	0.01342	0.01354	0.00793	0.01071
184.8	0.01371	0.01375	0.00817	0.01063
185.04	0.01343	0.01351	0.00814	0.01088
185.28	0.01371	0.01367	0.00834	0.01096
185.52	0.01333	0.01351	0.0084	0.01098
185.76	0.01345	0.01322	0.00826	0.01066
186	0.01358	0.0134	0.00834	0.01056
186.24	0.01361	0.01369	0.0082	0.01073
186.48	0.01371	0.01397	0.00822	0.0108
186.72	0.01355	0.0137	0.00826	0.01056
186.96	0.01386	0.01372	0.00817	0.01075
187.2	0.01354	0.01371	0.00823	0.0106
187.44	0.01354	0.01384	0.00814	0.01085
187.68	0.01359	0.01378	0.00814	0.01066
187.92	0.01359	0.01375	0.00843	0.01089
188.16	0.01335	0.01358	0.00812	0.01099
188.4	0.01341	0.01348	0.00829	0.01101
188.64	0.01352	0.01369	0.00795	0.01078
188.88	0.01351	0.01353	0.00841	0.01062
189.12	0.01373	0.01378	0.00802	0.01082
189.36	0.01368	0.01345	0.00806	0.01106
189.6	0.01359	0.0137	0.00847	0.01068
189.84	0.01372	0.01392	0.00797	0.01087
190.08	0.01367	0.01397	0.00808	0.01093
190.32	0.01357	0.01352	0.00803	0.0108
190.56	0.01355	0.01355	0.0081	0.01121
190.8	0.01359	0.01359	0.00802	0.01097
191.04	0.01368	0.01355	0.00832	0.01102
191.28	0.01356	0.01392	0.00815	0.01048
191.52	0.01374	0.01355	0.00827	0.01096
191.76	0.0131	0.01364	0.00789	0.01066
192	0.01362	0.01381	0.00827	0.01075
192.24	0.0134	0.0134	0.00838	0.01094
192.48	0.01358	0.01372	0.008	0.01081
192.72	0.01351	0.01373	0.00819	0.01086
192.96	0.01353	0.01397	0.00817	0.01103
193.2	0.01391	0.01379	0.00825	0.01073
193.44	0.0136	0.01374	0.00813	0.01078
193.68	0.01359	0.01401	0.00832	0.01082
193.92	0.01352	0.01369	0.00818	0.01073
194.16	0.01388	0.01396	0.00843	0.01089
194.4	0.01376	0.01342	0.00826	0.01068
194.64	0.01321	0.01394	0.008	0.01061
194.88	0.01383	0.01398	0.00824	0.01092
195.12	0.01337	0.0136	0.00818	0.01079
195.36	0.01386	0.01384	0.0078	0.01078
195.6	0.01383	0.01395	0.00823	0.01075
195.84	0.01359	0.01395	0.00816	0.01057
196.08	0.01357	0.01402	0.00838	0.01071
196.32	0.01377	0.01362	0.00817	0.01104
196.56	0.0137	0.01384	0.00793	0.01103
196.8	0.01385	0.01387	0.008	0.01086
197.04	0.01369	0.01368	0.00836	0.0111
197.28	0.01356	0.01373	0.00803	0.01088
197.52	0.01373	0.01371	0.00822	0.01068
197.76	0.01366	0.01373	0.00831	0.01056
198	0.01368	0.01391	0.00803	0.0107
198.24	0.01392	0.01408	0.00808	0.01062
198.48	0.01359	0.01385	0.00798	0.011
198.72	0.01354	0.01397	0.00821	0.0108
198.96	0.01363	0.01383	0.00813	0.0104
199.2	0.01362	0.01404	0.00809	0.01074
199.44	0.01396	0.01354	0.00803	0.01085
199.68	0.01361	0.01391	0.00802	0.01097
199.92	0.01377	0.01371	0.00845	0.01094
200.16	0.01345	0.01377	0.00816	0.01117
200.4	0.01374	0.01382	0.00808	0.01046
200.64	0.01353	0.01432	0.00828	0.01072
200.88	0.01365	0.01378	0.00806	0.01094
201.12	0.01372	0.01393	0.00814	0.01039
201.36	0.01358	0.0135	0.00805	0.01054
201.6	0.01396	0.01357	0.00822	0.01085
201.84	0.01369	0.0141	0.00813	0.01096
202.08	0.01368	0.01405	0.00809	0.01098
202.32	0.01375	0.01418	0.00801	0.01066
202.56	0.01348	0.01402	0.00829	0.01112
202.8	0.01337	0.01359	0.00794	0.01084
203.04	0.01387	0.01364	0.00823	0.01063
203.28	0.01372	0.01402	0.00797	0.01078
203.52	0.01353	0.01376	0.008	0.01067
203.76	0.01359	0.0139	0.00809	0.01094
204	0.01353	0.01412	0.00816	0.01077
204.24	0.01365	0.01384	0.0082	0.0109
204.48	0.01362	0.01386	0.00808	0.01096
204.72	0.01381	0.01399	0.00814	0.01068
204.96	0.01349	0.01405	0.008	0.01087
205.2	0.0138	0.01395	0.00774	0.01049
205.44	0.0137	0.01362	0.00823	0.01052
205.68	0.01386	0.01378	0.00812	0.01095
205.92	0.01372	0.01405	0.00818	0.0104
206.16	0.01363	0.01439	0.00796	0.01093
206.4	0.01343	0.01378	0.00826	0.01115
206.64	0.0135	0.01394	0.00812	0.01064
206.88	0.01391	0.01407	0.00813	0.01085
207.12	0.01388	0.01407	0.00814	0.01072
207.36	0.01363	0.014	0.00813	0.011
207.6	0.01366	0.01414	0.00835	0.01053
207.84	0.01387	0.01401	0.00811	0.01056
208.08	0.01383	0.01375	0.00815	0.01089
208.32	0.01373	0.01393	0.0082	0.01094
208.56	0.01363	0.01415	0.00801	0.01056
208.8	0.01382	0.01423	0.00789	0.01043
209.04	0.01385	0.01426	0.008	0.01076
209.28	0.01416	0.01423	0.00789	0.0106
209.52	0.01351	0.01393	0.00807	0.01055
209.76	0.01394	0.01388	0.00797	0.0108
210	0.0139	0.01421	0.0081	0.01068
210.24	0.0139	0.01399	0.00846	0.01082
210.48	0.01356	0.01388	0.00817	0.01079
210.72	0.01367	0.01417	0.00812	0.01068
210.96	0.01369	0.01398	0.00806	0.01091
211.2	0.01401	0.01448	0.00794	0.01073
211.44	0.01357	0.0139	0.00794	0.01073
211.68	0.0139	0.01421	0.00806	0.01091
211.92	0.01363	0.01395	0.00843	0.01044
212.16	0.01356	0.01407	0.00825	0.01075
212.4	0.01372	0.01412	0.00821	0.01075
212.64	0.01399	0.0141	0.00815	0.0106
212.88	0.01378	0.01394	0.00799	0.01074
213.12	0.01354	0.01417	0.00804	0.01037
213.36	0.01357	0.01402	0.008	0.01079
213.6	0.01368	0.01429	0.008	0.01094
213.84	0.01383	0.01426	0.00798	0.01086
214.08	0.01388	0.01402	0.00802	0.01073
214.32	0.01368	0.0138	0.00819	0.01079
214.56	0.01387	0.0139	0.00795	0.01103
214.8	0.01385	0.01399	0.00788	0.01066
215.04	0.01377	0.01436	0.00817	0.01062
215.28	0.01371	0.01419	0.00783	0.01071
215.52	0.01391	0.01405	0.00775	0.01088
215.76	0.0141	0.01403	0.00826	0.0106
216	0.01392	0.01406	0.00848	0.0104
216.24	0.01382	0.01392	0.00801	0.01096
216.48	0.01366	0.01405	0.00794	0.01095
216.72	0.01374	0.01411	0.00812	0.01082
216.96	0.01395	0.01417	0.00822	0.01028
217.2	0.01376	0.01415	0.00803	0.01062
217.44	0.01381	0.01432	0.00849	0.01061
217.68	0.01361	0.01411	0.00813	0.01056
217.92	0.01382	0.01403	0.00811	0.01069
218.16	0.01396	0.01404	0.00804	0.01083
218.4	0.01392	0.01409	0.00809	0.01104
218.64	0.01368	0.01421	0.00804	0.01077
218.88	0.01351	0.01436	0.00841	0.01094
219.12	0.01356	0.01384	0.0081	0.01064
219.36	0.01362	0.01403	0.00789	0.01076
219.6	0.01406	0.01396	0.00817	0.01068
219.84	0.01371	0.01383	0.00813	0.01085
220.08	0.01366	0.01403	0.00832	0.01074
220.32	0.01363	0.01447	0.00799	0.01069
220.56	0.01342	0.01379	0.00796	0.01054
220.8	0.0137	0.01403	0.00831	0.01039
221.04	0.01355	0.01396	0.00797	0.01044
221.28	0.0137	0.01425	0.00816	0.01047
221.52	0.01399	0.01393	0.00822	0.0104
221.76	0.01431	0.01431	0.00803	0.01073
222	0.0137	0.01408	0.0079	0.01053
222.24	0.01374	0.01412	0.00787	0.01039
222.48	0.014	0.01454	0.00802	0.01075
222.72	0.01365	0.01395	0.00787	0.01048
222.96	0.01404	0.01411	0.00788	0.01054
223.2	0.01369	0.0137	0.00796	0.01034
223.44	0.01379	0.01443	0.00824	0.01035
223.68	0.01361	0.01413	0.00797	0.011
223.92	0.01384	0.01385	0.00806	0.01048
224.16	0.01348	0.01441	0.00795	0.01043
224.4	0.01364	0.01363	0.00827	0.01055
224.64	0.01354	0.01409	0.00794	0.01067
224.88	0.01357	0.01412	0.00779	0.01075
225.12	0.01371	0.01406	0.00803	0.01088
225.36	0.01385	0.01409	0.00772	0.01084
225.6	0.01378	0.01394	0.00801	0.01064
225.84	0.01347	0.01393	0.00813	0.01064
226.08	0.01347	0.01419	0.00783	0.01062
226.32	0.01395	0.01372	0.00825	0.01068
226.56	0.01403	0.01399	0.00809	0.01069
226.8	0.01388	0.01418	0.00809	0.0106
227.04	0.01372	0.01385	0.008	0.01021
227.28	0.01357	0.01396	0.00806	0.0104
227.52	0.01367	0.01447	0.00787	0.0105
227.76	0.01358	0.01372	0.00784	0.01074
228	0.01354	0.0139	0.00817	0.01065
228.24	0.01391	0.01389	0.00805	0.0105
228.48	0.01385	0.01431	0.00795	0.01023
228.72	0.01359	0.01389	0.00809	0.01051
228.96	0.01334	0.01404	0.00814	0.01026
229.2	0.0136	0.01409	0.00809	0.01083
229.44	0.0137	0.01363	0.0081	0.01062
229.68	0.01374	0.01435	0.00795	0.01052
229.92	0.01375	0.0139	0.00786	0.01032
230.16	0.01379	0.01396	0.00789	0.01007
230.4	0.01372	0.01413	0.00796	0.01045
230.64	0.01369	0.01377	0.00797	0.0104
230.88	0.01352	0.01378	0.00794	0.01047
231.12	0.01393	0.014	0.00812	0.01065
231.36	0.0138	0.014	0.00781	0.01046
231.6	0.01369	0.01423	0.00789	0.01031
231.84	0.01377	0.01436	0.00782	0.01068
232.08	0.01389	0.01423	0.00786	0.01045
232.32	0.0136	0.01376	0.00784	0.01037
232.56	0.01356	0.01431	0.00786	0.01031
232.8	0.0136	0.01431	0.00779	0.01056
233.04	0.01373	0.01411	0.00764	0.01041
233.28	0.0139	0.01382	0.00798	0.01057
233.52	0.01389	0.01405	0.0078	0.01042
233.76	0.01417	0.014	0.00767	0.01026
234	0.0136	0.01387	0.00771	0.0105
234.24	0.0136	0.01385	0.00776	0.01035
234.48	0.0136	0.01404	0.0082	0.01016
234.72	0.01367	0.01369	0.00782	0.01061
234.96	0.01373	0.01397	0.00772	0.01025
235.2	0.01362	0.01406	0.00797	0.01058
235.44	0.01356	0.01426	0.0079	0.0103
235.68	0.01366	0.01377	0.00768	0.01053
235.92	0.01372	0.01403	0.00775	0.01017
236.16	0.01367	0.01396	0.00785	0.01025
236.4	0.01361	0.01421	0.00784	0.01033
236.64	0.01376	0.01409	0.00796	0.01076
236.88	0.01396	0.01396	0.00808	0.01049
237.12	0.01362	0.01377	0.00791	0.01056
237.36	0.01383	0.01403	0.00808	0.0108
237.6	0.01371	0.01403	0.00799	0.01033
237.84	0.0138	0.01383	0.0078	0.01019
238.08	0.01388	0.01378	0.00788	0.01011
238.32	0.01381	0.01415	0.00774	0.01036
238.56	0.01395	0.01394	0.00795	0.01034
238.8	0.01374	0.01415	0.00775	0.0106
239.04	0.01377	0.01409	0.00787	0.01033
239.28	0.01364	0.01416	0.00791	0.0108
239.52	0.01357	0.01419	0.0078	0.01033
239.76	0.01352	0.01417	0.00785	0.01046

## Sheet: Control
Time	Exp1	Exp2	Exp3	Exp4
0	-8e-05	-2e-05	-0.00019	0
0.24	-0.00037	3e-05	6e-05	9e-05
0.48	-0.00011	-0.00015	0.00015	5e-05
0.72	9e-05	-0.00019	0.0002	0.0001
0.96	0.00028	-7e-05	0.0001	-7e-05
1.2	-0.00021	0	-9e-05	0.00022
1.44	7e-05	0.00022	-9e-05	0.0001
1.68	-0.00014	-5e-05	-0.00013	0.00014
1.92	0.00012	4e-05	0	4e-05
2.16	-0.00027	-0.00032	1e-05	-0.00013
2.4	-0.00024	0.00014	-2e-05	0.00029
2.64	0.00018	5e-05	-0.00013	9e-05
2.88	0.00019	-0.00011	-0.00017	0.0002
3.12	0.00024	0.00016	0.00015	-1e-05
3.36	-0.00012	0.00043	-0.00022	0.0002
3.6	-1e-05	0.00025	-0.00017	9e-05
3.84	-0.00032	0.00011	-7e-05	-0.00037
4.08	-3e-05	-1e-05	-3e-05	-1e-05
4.32	-1e-05	0.00011	0.00014	0.00015
4.56	4e-05	-0.00012	0.00029	-0.00023
4.8	0.00015	0.00017	0.00014	0.00026
5.04	6e-05	2e-05	0	2e-05
5.28	-0.00035	0.00016	-2e-05	-0.00014
5.52	0.00013	-8e-05	-0.00024	0.0002
5.76	-0.00038	-0.00014	-2e-05	-0.00042
6	0.00012	-0.00011	3e-05	0.00021
6.24	0.00015	2e-05	-9e-05	-2e-05
6.48	-9e-05	-0.00011	0	5e-05
6.72	1e-05	0.00032	2e-05	0.00016
6.96	-0.00013	0.00012	5e-05	-0.00015
7.2	0.00012	-0.00014	4e-05	-0.00038
7.44	0.00014	-0.00037	-0.00014	-0.00011
7.68	-9e-05	-0.00028	-6e-05	0.00016
7.92	0.0001	-7e-05	0	-7e-05
8.16	0.00015	0.0001	8e-05	6e-05
8.4	0.00022	0.00022	-3e-05	0.00017
8.64	-0.00014	6e-05	4e-05	7e-05
8.88	0.0001	2e-05	-5e-05	-5e-05
9.12	-0.00026	-4e-05	-0.0002	-0.00011
9.36	-0.00023	0.0001	-1e-05	-3e-05
9.6	-1e-05	-0.00012	-7e-05	0.0001
9.84	-0.00028	0.00015	1e-05	-0.0001
10.08	0.00038	0.0002	0.00028	6e-05
10.32	-0.00019	0	-0.0001	0.00037
10.56	-3e-05	-0.0001	-0.00011	-0.00031
10.8	0.00014	0.00017	0.00011	0.00022
11.04	3e-05	5e-05	9e-05	0.00017
11.28	-1e-05	9e-05	2e-05	-8e-05
11.52	7e-05	-0.00037	5e-05	-0.00015
11.76	0.00012	-7e-05	0	-0.00016
12	6e-05	-0.00031	0.00028	0.00014
12.24	0.00022	-0.00025	-9e-05	-0.00011
12.48	6e-05	-3e-05	7e-05	-7e-05
12.72	0.00028	0.00011	-0.00024	5e-05
12.96	-8e-05	8e-05	0.00018	0.00015
13.2	-8e-05	0.00019	-9e-05	0.00018
13.44	-0.00017	-1e-05	-2e-05	-4e-05
13.68	-1e-05	0.00015	9e-05	4e-05
13.92	-6e-05	8e-05	-0.00031	-1e-05
14.16	-0.00011	-2e-05	-0.00028	6e-05
14.4	0.00018	-9e-05	-3e-05	0.00032
14.64	-0.0002	-0.0001	-0.00015	-0.00017
14.88	0.00039	-4e-05	3e-05	-5e-05
15.12	-0.00012	0.00031	-6e-05	-1e-05
15.36	-1e-05	-0.00017	-0.00019	-0.00031
15.6	-0.00014	-7e-05	-0.00026	-0.00022
15.84	-0.00023	-0.00022	0.00011	0.00025
16.08	-0.0002	0.00033	-0.00019	9e-05
16.32	-1e-05	0.00016	0.0002	-0.00022
16.56	0.00032	-0.0001	0.00011	-1e-05
16.8	0.00018	-0.0002	1e-05	0.0003
17.04	0.00022	-0.00035	3e-05	-0.00016
17.28	0.00015	-0.00048	0.00018	-0.00012
17.52	-0.00011	-2e-05	-9e-05	-2e-05
17.76	0.00028	0.0001	0.00017	-0.00022
18	8e-05	0.00023	-2e-05	0.00011
18.24	-0.00035	0.00033	-7e-05	-0.00023
18.48	5e-05	-3e-05	7e-05	-0.0001
18.72	0.00027	-0.00015	0.00022	5e-05
18.96	0.00012	3e-05	0.00018	-0.00021
19.2	-0.00015	0.00012	-0.00014	5e-05
19.44	4e-05	-2e-05	-7e-05	5e-05
19.68	-0.00017	-0.00015	0.0003	0.00012
19.92	-0.00012	0.00013	0.00013	5e-05
20.16	-0.00022	2e-05	6e-05	0.00014
20.4	-0.00038	0.00014	-0.00012	0.00013
20.64	0.0001	-0.0002	-4e-05	-0.00018
20.88	9e-05	6e-05	2e-05	-8e-05
21.12	0.00022	0.00015	-0.00015	-0.00029
21.36	-7e-05	0.0002	0.00018	-0.00011
21.6	0	-0.00023	-0.00022	8e-05
21.84	9e-05	-0.00013	1e-05	-0.00031
22.08	0.00014	0.00033	0.00016	7e-05
22.32	-2e-05	-0.0001	-3e-05	2e-05
22.56	-5e-05	-6e-05	-0.00021	0.00018
22.8	-8e-05	1e-05	-0.00011	0.00034
23.04	-0.00015	-0.00014	0.00017	8e-05
23.28	0.0002	-5e-05	4e-05	0.00012
23.52	-0.00018	3e-05	0.0001	4e-05
23.76	0.00014	0.00012	0.00011	-8e-05
24	-8e-05	5e-05	0.00012	2e-05
24.24	0.0002	0.00011	-0.00022	2e-05
24.48	0.00014	3e-05	6e-05	-5e-05
24.72	0.00014	3e-05	-5e-05	-0.00024
24.96	-5e-05	-0.00013	0.0001	-0.00019
25.2	0.00022	8e-05	0.00012	-2e-05
25.44	0.00018	0.00034	0.00015	-3e-05
25.68	-5e-05	4e-05	0.00014	-0.00014
25.92	1e-05	-0.00023	2e-05	-3e-05
26.16	-8e-05	-0.00042	0.00011	0
26.4	0.00015	-0.0004	-7e-05	0.00029
26.64	-0.00017	-0.00011	1e-05	0.00016
26.88	-0.00019	0.00036	0.0001	0
27.12	-0.00013	0.00012	4e-05	-0.00024
27.36	-7e-05	2e-05	0.00023	-0.00027
27.6	0.00026	0.00032	-5e-05	-0.00013
27.84	-0.00011	-0.00026	-0.00015	6e-05
28.08	-0.0003	-0.00015	-0.00013	3e-05
28.32	-4e-05	7e-05	0.0001	-0.00026
28.56	2e-05	-0.00013	-7e-05	0.00015
28.8	0.0003	0.00015	-0.00018	4e-05
29.04	-0.00017	0	-0.00015	0.00029
29.28	0.00026	7e-05	1e-05	-0.00015
29.52	0.00012	-3e-05	6e-05	-8e-05
29.76	5e-05	-0.00028	-9e-05	-3e-05
30	3e-05	0.00011	0.00025	0.0003
30.24	0.00036	0.00017	0.00028	0.00038
30.48	0.00053	0.00029	0.00039	0.0008
30.72	-0.00944	-0.01028	-0.00983	-0.00826
30.96	-0.0562	-0.05859	-0.05609	-0.04844
31.2	0.01918	0.02094	0.01776	0.02163
31.44	-0.01922	-0.02013	-0.01923	-0.01604
31.68	0.00023	0.00035	0.00084	0.0004
31.92	0.00011	0.0003	0.00039	0.00053
32.16	-8e-05	-0.00013	0.00045	0.00049
32.4	6e-05	0.00016	0.00056	9e-05
32.64	0.00023	-0.0002	0.0003	0.0002
32.88	0.00019	7e-05	0.00047	0.00023
33.12	0.00039	0.00027	0.00047	0.00015
33.36	-0.00012	0.00017	0.00068	0.00014
33.6	0.00016	-0.00013	0.00069	-0.00021
33.84	5e-05	0.00012	0.0003	-2e-05
34.08	4e-05	6e-05	0.00058	0.00036
34.32	2e-05	0.00033	0.00038	0.00018
34.56	-0.00017	0.00032	0.00027	0.00037
34.8	0.00025	-0.00019	0.00073	0.00036
35.04	0.00011	0.00019	0.00045	8e-05
35.28	0.0001	0.0004	0.00019	0.00028
35.52	-7e-05	0.00036	0.0001	0.00018
35.76	-0.0001	0.00029	0.00037	0.00037
36	-2e-05	0.00028	0.00028	0.00046
36.24	9e-05	0	0.00028	0.00033
36.48	0.00017	0.00027	0.00043	0.00029
36.72	0.00023	0.0001	0.00029	0.00026
36.96	0.00015	0.00013	0.00045	0.0003
37.2	0.00048	7e-05	-3e-05	6e-05
37.44	0.00025	0.00029	0.00023	0.00016
37.68	0.00017	0.00015	5e-05	0.0002
37.92	0.00016	0.00024	0.00033	-6e-05
38.16	-5e-05	0.00024	0.00027	6e-05
38.4	-5e-05	0.00035	0.00039	0.00021
38.64	-6e-05	0.00011	0.00025	0.00028
38.88	-0.00029	-3e-05	0.00037	0.00011
39.12	2e-05	0.00015	0.00013	9e-05
39.36	-4e-05	3e-05	0.00035	-0.00014
39.6	0.00013	0.00019	0.00037	0.0001
39.84	0.00026	0.00038	0.00036	0.00022
40.08	-1e-05	0.00019	0.00022	0.00015
40.32	0.00039	0.00036	0.00027	-5e-05
40.56	0.00021	3e-05	0.0004	0.00018
40.8	-7e-05	0.00016	0.00023	0.00016
41.04	0.0002	0.00014	0.00025	0.00016
41.28	-1e-05	0.00016	0.00024	0.00027
41.52	2e-05	0.00037	0.00033	1e-05
41.76	0.00021	0.0002	0.00051	0.00033
42	0.00015	0.00024	0.0003	0.00027
42.24	0.00024	8e-05	0.00038	0.0002
42.48	-1e-05	6e-05	0.00029	-6e-05
42.72	8e-05	0.00014	0.00036	0.00016
42.96	0.00031	0.00043	0.00021	-2e-05
43.2	-0.00021	-5e-05	0.00036	0.00049
43.44	1e-05	0.00044	9e-05	0.00026
43.68	0.00019	0.00038	0.00043	0.00063
43.92	0.0003	0.00034	0.0003	0.00023
44.16	7e-05	0.00027	0.0002	0.00018
44.4	-5e-05	0.00035	0.00031	0.00016
44.64	-4e-05	0.0003	0.00031	0.00036
44.88	0.00023	2e-05	0.00032	4e-05
45.12	0.00042	0.00023	2e-05	4e-05
45.36	-9e-05	0.00011	8e-05	0.00036
45.6	5e-05	-0.00011	0.00022	0.00018
45.84	0.0001	0.00028	0.00028	8e-05
46.08	0.0001	0.00033	0.00015	0.00031
46.32	0.00027	0.00014	0.00025	0.00023
46.56	3e-05	7e-05	0.00021	0.00014
46.8	0.00014	0.00036	0.00022	0.00017
47.04	0.00013	6e-05	0.00026	0.00029
47.28	0.00021	0.00029	0.00014	0.00017
47.52	-4e-05	5e-05	0.00019	0.00022
47.76	1e-05	-3e-05	0.00046	0.0004
48	-0.00011	0.00013	0.00029	0.0004
48.24	0.00018	0.00021	0.00035	0.00024
48.48	-0.00027	0.00012	0.00035	9e-05
48.72	0.0001	0.00044	0.00017	0.00018
48.96	0.00024	0.00012	4e-05	-0.00013
49.2	-2e-05	0.00024	0.00017	0.00014
49.44	-6e-05	-3e-05	0.00029	0.00035
49.68	0	0.00015	0.00032	5e-05
49.92	0.00021	0.00019	0.00041	0.00018
50.16	-0.00019	4e-05	0.00024	0.00028
50.4	0.00038	7e-05	0.0004	7e-05
50.64	0.00021	4e-05	0.00037	0.00037
50.88	8e-05	0.00012	0.0003	0
51.12	0.0001	0.00016	0.00043	0.00016
51.36	0.0001	4e-05	0.00018	0.0001
51.6	0.00018	0.00014	0.00016	0.00011
51.84	0.00022	-1e-05	0.0003	0.00013
52.08	0.00029	0.00036	0.00016	0.00019
52.32	0.00012	-0.00011	0.00026	0.00022
52.56	9e-05	-2e-05	0.00015	0.00042
52.8	-0.00022	0.00039	0.00024	-8e-05
53.04	3e-05	0.00015	6e-05	0.00028
53.28	8e-05	-3e-05	0.00025	-0.00015
53.52	0.00035	0.00014	0.00051	-2e-05
53.76	0.00016	0.00014	0.00017	0.00025
54	0.00012	0.00011	0.00028	0.00015
54.24	0.00011	5e-05	2e-05	0.00023
54.48	-8e-05	0.00033	0.00039	0.00013
54.72	-7e-05	0.00022	0.00032	0.00028
54.96	0.00016	6e-05	0.00032	0.00021
55.2	0.00019	0.00035	0.00033	0.00041
55.44	-0.00014	0.00019	0.00027	6e-05
55.68	-1e-05	0.0001	0.00048	3e-05
55.92	0.00022	0.00027	0.00044	0.00028
56.16	0.00021	-0.00015	0.00052	0.00015
56.4	0.00028	4e-05	0.00042	-7e-05
56.64	0	0.00022	0.00037	0.00038
56.88	3e-05	0.00036	0.0003	0.0001
57.12	0.00016	7e-05	0.00013	0.00028
57.36	0.00013	0.00011	0.00017	0.00032
57.6	0.00024	-0.00019	0.0003	0.0006
57.84	0.00017	0.00038	0.00016	6e-05
58.08	0.00043	0.00016	6e-05	0.0003
58.32	0.0003	0.00017	0.00038	0.00029
58.56	5e-05	-0.00011	0.00042	0.00028
58.8	0.00011	0.00042	7e-05	0.00011
59.04	0.00035	7e-05	0.00033	0.00018
59.28	-1e-05	0.00029	0.00054	0.00024
59.52	0.00043	0.00023	0.00011	0.00014
59.76	9e-05	0.00011	0.00038	0.00013
60	0	0.00024	0.00014	0.00027
60.24	0.00014	4e-05	0.00017	0.00012
60.48	0.0001	0.00011	0.0005	0.00022
60.72	0.00032	0.00013	0.00021	0.00013
60.96	9e-05	0.00025	0.0002	0.00032
61.2	-4e-05	9e-05	0.00045	1e-05
61.44	8e-05	0.00029	-3e-05	0.00028
61.68	0.00016	-8e-05	2e-05	0.00044
61.92	3e-05	0.00025	0.00021	0
62.16	0.00032	0.00019	0.00028	0.00022
62.4	0.00018	0.00051	0.00044	0.00015
62.64	2e-05	8e-05	0.0004	2e-05
62.88	0.00029	0.00021	0.00018	0.00021
63.12	0.00016	0.00018	0.00028	9e-05
63.36	-2e-05	0.0004	9e-05	0.00016
63.6	5e-05	0.00012	0.00024	0.00023
63.84	0.00016	0.0001	0.00012	0.00017
64.08	0.00013	0.0002	0.00025	-3e-05
64.32	0.00025	0.0001	0.00025	0.00011
64.56	-0.00026	0.0002	0.0003	0.00022
64.8	0.00051	0.00012	6e-05	-4e-05
65.04	3e-05	0.00027	0.00033	2e-05
65.28	0.00032	0.00021	0.00022	0.00014
65.52	0.00018	-0.00042	0.0003	-6e-05
65.76	9e-05	-0.00022	0.0003	0.00024
66	0.00011	0.00015	0.00011	0.00017
66.24	-3e-05	8e-05	0.0002	-3e-05
66.48	0.00019	0.00043	0.00043	0.00016
66.72	0.00021	7e-05	0.00029	0.00043
66.96	-0.0002	-1e-05	0.00043	0.00041
67.2	-0.0001	7e-05	0.0005	0.00036
67.44	0.00013	0.00016	9e-05	0.00015
67.68	9e-05	0.00032	0.00024	0.0002
67.92	8e-05	0.00031	0.00023	-7e-05
68.16	3e-05	0.00017	0.00038	0.00029
68.4	6e-05	-0.00021	0.00048	4e-05
68.64	0.00013	-0.0001	0.00029	9e-05
68.88	0.00042	1e-05	8e-05	-0.0001
69.12	0.00026	0.00016	0.00041	-8e-05
69.36	3e-05	0.00015	6e-05	-0.00013
69.6	0.00033	5e-05	0.00025	0.00012
69.84	0.00022	0.00031	0.00013	-5e-05
70.08	0.00014	5e-05	0.00014	0.00022
70.32	0.00011	0.00026	0.00046	0.00024
70.56	0.00027	0.00026	0.00019	0.00013
70.8	-0.00014	0.00024	0.00022	0.00014
71.04	-0.00012	0.00043	0.00041	0.00021
71.28	0.00017	0.00028	0.00025	0
71.52	0.00024	0.00015	0.00035	-5e-05
71.76	-0.00015	0.00025	0.00037	-0.0001
72	-3e-05	0.00017	0.00032	-0.00017
72.24	-0.0001	0.00041	9e-05	0.00018
72.48	6e-05	-1e-05	0.00012	-0.0001
72.72	0.00011	0.0002	0.00043	0.00026
72.96	8e-05	0.00015	0.00031	0.00037
73.2	2e-05	-0.00018	0.00013	0.00011
73.44	9e-05	1e-05	0.00019	5e-05
73.68	0.00011	0.0001	0.00028	0.00013
73.92	0.00012	0.00044	0.00055	0.00024
74.16	5e-05	7e-05	0.00028	0.00017
74.4	5e-05	0.00015	0.00039	-2e-05
74.64	0.00022	0.00021	0.00042	0.0001
74.88	-0.0001	2e-05	4e-05	0.00024
75.12	6e-05	0.00018	0.00026	-3e-05
75.36	0.0002	-5e-05	3e-05	0.00031
75.6	-0.00017	0.00033	0.00029	-4e-05
75.84	-3e-05	-0.0001	0.00025	1e-05
76.08	0.00046	-5e-05	0.00033	0.00028
76.32	0.00033	-2e-05	0.00019	0.00016
76.56	0	0.00026	0.00027	-8e-05
76.8	0.00019	-6e-05	0.00056	-0.00017
77.04	3e-05	0.00024	0.00026	-3e-05
77.28	0.00015	-9e-05	-2e-05	0.0005
77.52	-4e-05	0.00011	0.00028	-0.00016
77.76	0.00013	0.00026	0.00017	0.00019
78	-1e-05	0.00026	0.0002	0.0001
78.24	-8e-05	-8e-05	0.00023	5e-05
78.48	-0.0001	1e-05	0.00013	3e-05
78.72	7e-05	0.00016	0.00015	0.0001
78.96	7e-05	-0.00018	0.0001	2e-05
79.2	-0.00011	1e-05	0	0.00015
79.44	-0.00032	2e-05	0.00018	3e-05
79.68	0.00025	0.0002	0.00019	-0.0001
79.92	0.00026	0.00012	0.00027	0.00021
80.16	0.00012	0.00033	0.00037	-0.00015
80.4	0.00028	0.00026	-7e-05	6e-05
80.64	2e-05	0	0.0003	-0.0002
80.88	0.00031	0.0001	0.0001	0.0002
81.12	4e-05	-0.00015	0.00048	0.00021
81.36	-0.00018	0.00027	0.00017	9e-05
81.6	0.00039	2e-05	0.00023	7e-05
81.84	0.00013	-2e-05	0.00032	5e-05
82.08	0.00014	9e-05	0.00035	-0.0001
82.32	8e-05	0.00016	0.00018	5e-05
82.56	0.00012	0.00041	0.0003	-0.00013
82.8	-0.00015	7e-05	2e-05	3e-05
83.04	0.00029	9e-05	0.00026	5e-05
83.28	0.00015	0	9e-05	0.00033
83.52	0.0002	0.00028	5e-05	-0.00015
83.76	-5e-05	0.00014	0.00037	-0.00017
84	0.00043	4e-05	0.00029	0.00011
84.24	-8e-05	0.00042	0.00051	-0.00016
84.48	0.00021	-0.0001	0.00024	9e-05
84.72	0.00027	0.00024	0.00025	0.0001
84.96	3e-05	0.00031	0.00029	0.00012
85.2	0.00023	0.00017	0.00032	6e-05
85.44	7e-05	0.00025	0.00046	0.00014
85.68	0.00024	0.00021	0.00026	0.00023
85.92	-2e-05	0.00032	5e-05	2e-05
86.16	0.00032	2e-05	0.0002	0.00025
86.4	8e-05	0.0001	0.00023	-0.00011
86.64	0.00017	0.00017	0.0001	7e-05
86.88	8e-05	-3e-05	5e-05	0.00014
87.12	0.00051	-7e-05	0.00018	-0.00016
87.36	-9e-05	-0.00032	0.00021	1e-05
87.6	0.00011	-2e-05	0.0001	-7e-05
87.84	-8e-05	9e-05	0.00024	0
88.08	-3e-05	0.00019	0.00053	0
88.32	-9e-05	-0.00014	0.00026	7e-05
88.56	-2e-05	0.00037	0.00016	2e-05
88.8	0.00036	0.00028	-3e-05	-0.00029
89.04	8e-05	-8e-05	0.00034	-5e-05
89.28	-6e-05	0.00037	0.00035	8e-05
89.52	0.00013	8e-05	9e-05	0.00017
89.76	0.0002	1e-05	0.00026	-2e-05
90	0.00017	0.00018	0.00034	0.00016
90.24	0.00011	-2e-05	0.00026	-2e-05
90.48	2e-05	0.00063	0.00025	-0.00025
90.72	0.00018	-7e-05	0.00028	0.0001
90.96	-8e-05	-0.00014	0	-0.00021
91.2	-5e-05	0.00016	0.00027	-0.0003
91.44	-7e-05	0.00016	0.0002	-2e-05
91.68	0	-0.00017	-4e-05	0.00028
91.92	2e-05	0.00022	0.00016	3e-05
92.16	0.00015	0	0.00014	-0.00028
92.4	-7e-05	0.00037	0.00019	3e-05
92.64	0.00011	0.0002	0.00045	-0.0001
92.88	0.00023	0.0003	8e-05	-0.00018
93.12	-0.00021	-0.00018	0.00045	-5e-05
93.36	0.00023	0.00011	0.00028	1e-05
93.6	3e-05	0.00019	6e-05	0.00024
93.84	0.0001	1e-05	0.00027	-3e-05
94.08	6e-05	0.00044	0.00044	-0.0002
94.32	3e-05	7e-05	0.00022	-2e-05
94.56	-0.00011	0.00029	0.00015	-0.00017
94.8	0.00026	0.00024	0.00016	0.00034
95.04	-0.00014	4e-05	0.0001	-9e-05
95.28	-0.00017	-7e-05	0.00011	0.00023
95.52	0.00038	0.00043	0.00032	1e-05
95.76	6e-05	-0.00013	9e-05	9e-05
96	-7e-05	-0.00015	0.00017	-0.00017
96.24	0.00019	0.00027	0.00043	0.00027
96.48	2e-05	0.00032	0.00038	0.00021
96.72	7e-05	-2e-05	0.00033	0.00027
96.96	0.00017	0.00013	0.00023	0
97.2	-0.00012	-8e-05	0.00036	-2e-05
97.44	0.0002	1e-05	0.00019	-0.00038
97.68	0.00018	0	0.00016	2e-05
97.92	0.00027	0.00027	0.0001	-0.00011
98.16	0.00015	-0.00011	0.0006	-9e-05
98.4	-0.00031	7e-05	0.0002	-3e-05
98.64	0.00016	-8e-05	0.00014	-0.00022
98.88	0.00013	0.00014	0.0001	3e-05
99.12	0.0001	-0.00023	-1e-05	0.00012
99.36	-0.00019	0.00012	-4e-05	-3e-05
99.6	0.00017	0.00018	0.00057	0.00024
99.84	5e-05	-0.00011	0.00045	-1e-05
100.08	0.00032	0.00044	0.00012	0.00031
100.32	6e-05	0.00032	0.00039	0.00011
100.56	-0.00011	6e-05	0.00019	0
100.8	-3e-05	8e-05	0.00033	-0.00025
101.04	0.00019	-0.00012	0.00025	-5e-05
101.28	0.00041	0.00033	6e-05	0.00011
101.52	0.00013	0.00012	0.00011	6e-05
101.76	0.00029	0.00014	0.00021	0.00021
102	0.00014	0.00023	0.00017	0.00027
102.24	-6e-05	-0.00016	-3e-05	4e-05
102.48	1e-05	-0.00031	0.00025	-0.0001
102.72	-5e-05	0.00047	2e-05	-0.00021
102.96	0.0001	-0.00017	0.00021	8e-05
103.2	0.00013	0.00029	1e-05	-0.0001
103.44	-7e-05	7e-05	0.00012	0.00012
103.68	0.00018	4e-05	0.00024	0.0002
103.92	0.00021	-7e-05	0.00034	-0.00019
104.16	-0.00027	-9e-05	0.00033	-0.00016
104.4	0.00011	7e-05	0.00026	0.00014
104.64	-5e-05	-0.00018	0.00013	4e-05
104.88	2e-05	0	0.0002	4e-05
105.12	0.00041	0.00028	-8e-05	-0.00019
105.36	3e-05	0.00026	0.00032	0.00024
105.6	0.0003	-0.00021	0.00062	-1e-05
105.84	0.00014	0.00022	0.00019	7e-05
106.08	-0.00022	-5e-05	0.00025	-0.00021
106.32	-1e-05	0.00038	7e-05	-0.00015
106.56	1e-05	0.00053	0.00014	-9e-05
106.8	-3e-05	2e-05	0.00032	7e-05
107.04	0.00011	-6e-05	0.00033	7e-05
107.28	0.00012	-0.0001	0.00027	-8e-05
107.52	-0.00013	-0.00019	0.00037	-0.00029
107.76	0.00015	0.00015	0.0001	-0.00017
108	0.00026	-2e-05	-0.00011	-8e-05
108.24	-7e-05	8e-05	0.0004	0.00013
108.48	0.00014	8e-05	0.00033	-0.00015
108.72	0.00044	0.0001	0.00021	-1e-05
108.96	0.00035	0.00047	0.00032	-0.00034
109.2	0.00025	5e-05	0.00014	0.00016
109.44	-0.00011	3e-05	0.00017	-9e-05
109.68	1e-05	6e-05	0.00018	0.00018
109.92	7e-05	0.00038	0.00049	0
110.16	0.0004	9e-05	0.00023	-9e-05
110.4	0.00032	7e-05	0.00017	0.00024
110.64	-0.0001	6e-05	0.00041	-8e-05
110.88	9e-05	-0.00016	0.0003	0
111.12	6e-05	-7e-05	0.00019	-0.00023
111.36	0.00012	-0.00031	0.00033	-0.00018
111.6	0.00023	0.00025	0.00029	0
111.84	9e-05	-0.00022	0.0001	0.00026
112.08	0.0002	0.0003	0.00032	4e-05
112.32	-0.00014	0.00017	0.0002	-0.00026
112.56	6e-05	-4e-05	0.00025	3e-05
112.8	-1e-05	0.00013	7e-05	3e-05
113.04	0.00013	5e-05	0.00025	-6e-05
113.28	0.0003	-3e-05	-7e-05	-6e-05
113.52	0.00017	-0.00011	0.00038	-0.00011
113.76	-0.00014	-0.00013	8e-05	0.00015
114	9e-05	0.00013	0.00059	-0.00023
114.24	0.00011	0.00023	0.00012	-0.00015
114.48	-0.00018	0.00014	0.00034	-1e-05
114.72	-9e-05	-8e-05	8e-05	-0.00014
114.96	0.00015	0.0003	0.00011	-0.0001
115.2	0.00013	0.00045	0.00019	-7e-05
115.44	7e-05	4e-05	0.00049	-0.00022
115.68	-0.0001	0.00021	0.0003	5e-05
115.92	0.00029	6e-05	0.00029	-0.00011
116.16	0	-0.0002	0.00038	-0.00018
116.4	0.00029	-0.00013	0.00033	-0.00021
116.64	0.0001	-0.00027	5e-05	-0.00021
116.88	7e-05	4e-05	0.0002	-0.00066
117.12	0.0001	0.00015	0.00015	-0.00033
117.36	0.00013	7e-05	0.00015	-0.00018
117.6	2e-05	0.00036	-0.00023	0.0001
117.84	-0.00014	-0.00032	0.00019	-5e-05
118.08	0.00012	-9e-05	0.00019	-0.00012
118.32	0.00035	3e-05	0.00014	0.00018
118.56	0.00048	0.00025	0.00023	-7e-05
118.8	0.00027	0.00013	0.0001	-0.00018
119.04	0.00023	0	0.0003	-0.00032
119.28	0.00027	0.00042	0.0003	0.00027
119.52	0.00023	-0.00025	0.00018	-7e-05
119.76	-7e-05	-5e-05	0.00032	-0.00016
120	6e-05	0.00034	0.00016	9e-05
120.24	0.00011	0.00041	0.00013	-0.0001
120.48	0.00019	0.0001	0.00039	-2e-05
120.72	0.00028	0.00011	0.00025	-0.00036
120.96	0.00028	0.00014	0.0004	0.00013
121.2	-8e-05	0.00017	0.00034	-0.00014
121.44	7e-05	7e-05	-7e-05	6e-05
121.68	5e-05	-0.00021	0.00023	-0.00031
121.92	0.00014	0.00025	0.00019	-9e-05
122.16	1e-05	0.00019	0.00013	0.00019
122.4	0.00032	-5e-05	0.0003	-0.00046
122.64	-1e-05	0.00013	0.00015	-0.00014
122.88	0.00027	0.00016	-6e-05	-9e-05
123.12	2e-05	5e-05	0.00015	-0.00026
123.36	0.00027	0.00014	1e-05	0.0001
123.6	0.00024	-8e-05	0.00012	6e-05
123.84	-3e-05	-0.00017	5e-05	0.0001
124.08	0.00048	0.00017	0.00013	-0.0002
124.32	-4e-05	-0.00021	0.00051	-0.00029
124.56	0.00019	-0.00018	-7e-05	-0.00014
124.8	0.00051	-8e-05	0.00012	5e-05
125.04	7e-05	0.00014	5e-05	-0.00018
125.28	-0.00015	0.00027	0.00012	-0.00022
125.52	-1e-05	0	8e-05	0
125.76	-1e-05	-0.00012	0.00022	-0.00044
126	0.00012	0.00037	8e-05	-0.00027
126.24	-3e-05	0.00034	0.0002	6e-05
126.48	0.00025	8e-05	7e-05	-0.00032
126.72	-3e-05	0.00023	0.0002	-0.00039
126.96	-1e-05	0.00042	3e-05	-4e-05
127.2	0.00038	0.00029	2e-05	-0.00012
127.44	0.0002	0.00019	0.00034	-6e-05
127.68	0.00024	1e-05	5e-05	-5e-05
127.92	9e-05	-0.00018	0.00028	0.00014
128.16	1e-05	0.00017	0.0001	-0.00049
128.4	0.00034	1e-05	0.00024	-0.00028
128.64	0.00024	7e-05	0.00019	-2e-05
128.88	0.00057	0.00014	4e-05	-0.00062
129.12	0.00011	0.0001	6e-05	-0.00024
129.36	0.00031	-0.0001	0.00025	-0.00038
129.6	0.00015	8e-05	0.00032	-0.00022
129.84	0.00015	0.00044	7e-05	-0.00035
130.08	-1e-05	0.00039	0.00028	-8e-05
130.32	0.00016	2e-05	5e-05	-0.00042
130.56	0.00018	0.00045	0.00031	-0.0001
130.8	5e-05	0.00016	0.00025	5e-05
131.04	4e-05	-7e-05	0.00019	-0.00028
131.28	4e-05	8e-05	-8e-05	-0.00038
131.52	-7e-05	0.00018	0.00022	7e-05
131.76	0.00016	5e-05	0.00025	-0.0001
132	4e-05	0.0004	0.00024	-0.00024
132.24	5e-05	-0.00023	-0.0002	-0.00031
132.48	0.00014	-0.00013	-3e-05	-0.00014
132.72	0.00016	-8e-05	0.00034	-0.00031
132.96	0.00014	1e-05	0.00034	-0.00027
133.2	-2e-05	0	0.0003	0.0001
133.44	0.00027	7e-05	1e-05	-0.00026
133.68	0.00021	0.00031	0.0002	-0.00036
133.92	-5e-05	-0.00015	0.00057	-3e-05
134.16	0.00024	-1e-05	0.00044	0.00011
134.4	-0.00015	0.00014	0.00019	9e-05
134.64	0.00029	-0.00017	0.0002	-0.00012
134.88	0.0002	0.00042	3e-05	-0.00021
135.12	0.00017	-2e-05	0.00011	-0.00023
135.36	5e-05	9e-05	0.00026	-0.00055
135.6	0.0001	3e-05	8e-05	-0.00021
135.84	-6e-05	-2e-05	0.00016	-0.00021
136.08	0.00034	0.00027	0.00021	-0.00012
136.32	0.00041	3e-05	0.00018	-5e-05
136.56	4e-05	0.00028	0.00033	-7e-05
136.8	0.00023	-0.00016	0.00016	-0.00042
137.04	0.00026	0.00035	-6e-05	-0.0002
137.28	0.00029	0.00019	-2e-05	5e-05
137.52	3e-05	-9e-05	0.00028	-0.00013
137.76	-0.00023	-6e-05	0.00028	9e-05
138	0.00026	-3e-05	1e-05	-0.00055
138.24	0.00027	-2e-05	9e-05	-0.00011
138.48	-0.00012	0.00011	0.00041	0.0002
138.72	0.00016	-5e-05	0.00013	-0.00014
138.96	-0.00012	5e-05	0.00018	-0.00045
139.2	0.00011	1e-05	0.00035	-0.00034
139.44	0.00046	0	0.0002	-0.00027
139.68	-9e-05	-5e-05	0.00014	-0.00014
139.92	-2e-05	-0.00016	0.00014	-0.00011
140.16	-0.00011	-0.00011	0.00017	-0.00011
140.4	0.00027	0.00026	0.0002	-0.00026
140.64	0.00023	4e-05	0.00019	-0.00011
140.88	0.00025	0.00041	0.00027	-0.00022
141.12	-8e-05	5e-05	0.00035	-0.00051
141.36	3e-05	9e-05	-1e-05	-0.00031
141.6	-8e-05	-4e-05	-2e-05	-0.00023
141.84	4e-05	0.00023	0	-7e-05
142.08	-0.00024	-6e-05	7e-05	-0.00041
142.32	5e-05	0.0001	0.00013	-0.00014
142.56	0.0001	-0.00029	0.00032	-0.00028
142.8	-9e-05	1e-05	0.00014	-0.00019
143.04	0.00027	0.00021	-4e-05	-0.00013
143.28	-8e-05	0.00016	9e-05	-0.00053
143.52	0.00031	0.00021	-7e-05	-0.00019
143.76	0.0003	0.00035	-7e-05	6e-05
144	4e-05	-0.00025	6e-05	-0.00038
144.24	9e-05	-2e-05	1e-05	-0.00051
144.48	-0.00015	9e-05	0.00028	-0.00027
144.72	-6e-05	0.00043	0.00016	-0.00019
144.96	-5e-05	0.00015	0.00032	-0.00044
145.2	6e-05	9e-05	0.00034	-8e-05
145.44	-4e-05	0.00018	0.00014	-0.00041
145.68	0.00022	8e-05	1e-05	-0.0003
145.92	0.00017	0.00052	0.00019	-0.00015
146.16	0.00034	5e-05	0.0002	-0.00025
146.4	0.00013	-0.00038	-8e-05	-0.00043
146.64	6e-05	0.0001	0.00034	-9e-05
146.88	0.00028	-1e-05	0.00027	-0.0003
147.12	-4e-05	0.00029	6e-05	-0.00031
147.36	-0.0001	1e-05	0.00024	-5e-05
147.6	3e-05	9e-05	0.00014	-0.00028
147.84	0.00013	-0.00011	0.0003	-9e-05
148.08	6e-05	-5e-05	9e-05	-0.00038
148.32	0.00017	-0.00015	0.00026	-0.00022
148.56	5e-05	0.00027	0.00024	-8e-05
148.8	4e-05	0.00014	-6e-05	-0.00027
149.04	0.00026	0.0005	0.00039	-0.00044
149.28	-0.00019	0.00028	7e-05	-0.00011
149.52	0.00028	0.00025	9e-05	4e-05
149.76	0.00013	0.0002	0.00012	-0.00038
150	0.00024	1e-05	0.00012	2e-05
150.24	0.00075	0.00121	0.00031	0.00099
150.48	0.00126	0.00131	0.00123	0.00132
150.72	-0.00884	-0.00956	-0.0099	-0.00721
150.96	-0.0544	-0.05733	-0.05483	-0.04716
151.2	0.02421	0.02542	0.02103	0.026
151.44	-0.0158	-0.01308	-0.01755	-0.00917
151.68	0.00475	0.00858	0.00352	0.0086
151.92	0.00518	0.00479	0.00369	0.00489
152.16	0.00577	0.00551	0.00391	0.00527
152.4	0.00623	0.00621	0.00446	0.00571
152.64	0.00652	0.00625	0.00436	0.00573
152.88	0.00729	0.00689	0.00446	0.00655
153.12	0.00759	0.00662	0.00501	0.00665
153.36	0.00795	0.00723	0.00509	0.00685
153.6	0.00771	0.00769	0.00542	0.00728
153.84	0.00845	0.00758	0.00559	0.00737
154.08	0.00883	0.00823	0.00568	0.00788
154.32	0.00923	0.00795	0.00604	0.00799
154.56	0.00966	0.00827	0.00615	0.00819
154.8	0.00988	0.0085	0.00617	0.00845
155.04	0.01012	0.00895	0.0064	0.00889
155.28	0.01023	0.00905	0.00651	0.00881
155.52	0.0104	0.00923	0.00624	0.00899
155.76	0.0106	0.00927	0.00665	0.00928
156	0.01071	0.00955	0.00663	0.00926
156.24	0.01087	0.00951	0.00671	0.00918
156.48	0.01088	0.00976	0.00684	0.00926
156.72	0.01106	0.00996	0.00739	0.00957
156.96	0.01127	0.00989	0.00735	0.00973
157.2	0.01143	0.01019	0.00733	0.00952
157.44	0.01179	0.01022	0.00719	0.00962
157.68	0.01185	0.01066	0.00739	0.00968
157.92	0.012	0.0109	0.00739	0.0101
158.16	0.01209	0.01067	0.0076	0.01015
158.4	0.012	0.0108	0.00754	0.01022
158.64	0.01203	0.01063	0.00757	0.00985
158.88	0.01262	0.01089	0.00791	0.01039
159.12	0.01283	0.01101	0.008	0.01004
159.36	0.01281	0.01093	0.00796	0.01023
159.6	0.01303	0.0111	0.00793	0.0106
159.84	0.01305	0.01091	0.00769	0.01008
160.08	0.01318	0.01092	0.00791	0.01073
160.32	0.01323	0.01122	0.00808	0.0109
160.56	0.013	0.01115	0.00812	0.01056
160.8	0.01349	0.01127	0.00823	0.01084
161.04	0.01355	0.01115	0.008	0.01056
161.28	0.0137	0.01144	0.00828	0.01061
161.52	0.01348	0.01165	0.00852	0.01086
161.76	0.01348	0.01186	0.00854	0.01067
162	0.01402	0.01188	0.00843	0.01094
162.24	0.01367	0.01174	0.00828	0.0108
162.48	0.01359	0.01147	0.0084	0.0109
162.72	0.01426	0.01242	0.00862	0.01093
162.96	0.01368	0.01187	0.00877	0.01081
163.2	0.01381	0.01175	0.00869	0.01125
163.44	0.01409	0.01194	0.00855	0.01113
163.68	0.01395	0.01208	0.00863	0.01117
163.92	0.01413	0.01235	0.00879	0.0112
164.16	0.01428	0.01247	0.00882	0.01139
164.4	0.01442	0.01184	0.00878	0.01144
164.64	0.01449	0.01189	0.00888	0.01112
164.88	0.01428	0.0123	0.00891	0.01115
165.12	0.01458	0.01232	0.00897	0.01118
165.36	0.01474	0.01239	0.00869	0.01111
165.6	0.01441	0.01247	0.00877	0.01116
165.84	0.01451	0.01245	0.00866	0.01099
166.08	0.0145	0.01211	0.00905	0.01151
166.32	0.01453	0.01256	0.0089	0.01135
166.56	0.01488	0.01255	0.00902	0.01123
166.8	0.01471	0.01221	0.00912	0.0112
167.04	0.01457	0.01261	0.00912	0.01134
167.28	0.01517	0.01266	0.00929	0.01177
167.52	0.01479	0.01256	0.00887	0.01157
167.76	0.01481	0.01269	0.00939	0.01176
168	0.01482	0.01242	0.00928	0.01159
168.24	0.01484	0.01286	0.00884	0.0115
168.48	0.01518	0.01241	0.00921	0.01163
168.72	0.01511	0.01265	0.00924	0.01145
168.96	0.01507	0.01236	0.00917	0.01148
169.2	0.01502	0.01292	0.00921	0.01176
169.44	0.01464	0.01285	0.00912	0.01173
169.68	0.01515	0.01267	0.00942	0.01134
169.92	0.01528	0.01298	0.00903	0.01149
170.16	0.01521	0.01244	0.0091	0.01159
170.4	0.01502	0.01278	0.00922	0.01155
170.64	0.01518	0.01316	0.00918	0.01127
170.88	0.01523	0.013	0.00909	0.01189
171.12	0.01536	0.01301	0.0095	0.01135
171.36	0.01526	0.01307	0.00929	0.01144
171.6	0.01534	0.01304	0.00931	0.01175
171.84	0.01507	0.01315	0.00939	0.01162
172.08	0.01529	0.01335	0.00956	0.01191
172.32	0.01529	0.01307	0.00926	0.01152
172.56	0.01551	0.01312	0.00952	0.01185
172.8	0.01547	0.01333	0.0094	0.01173
173.04	0.01535	0.01302	0.00955	0.01171
173.28	0.01512	0.01328	0.00923	0.01164
173.52	0.01557	0.01339	0.00946	0.01163
173.76	0.01552	0.01291	0.00963	0.01153
174	0.01543	0.01296	0.00951	0.01196
174.24	0.01535	0.01318	0.00942	0.01163
174.48	0.01531	0.0131	0.00967	0.0117
174.72	0.01574	0.01347	0.00938	0.01185
174.96	0.01548	0.01343	0.00959	0.0117
175.2	0.01581	0.01318	0.00926	0.0117
175.44	0.01593	0.01327	0.00955	0.01176
175.68	0.01564	0.01334	0.00976	0.01204
175.92	0.01597	0.01335	0.00967	0.01181
176.16	0.01579	0.01341	0.00938	0.01181
176.4	0.01546	0.0136	0.00949	0.0119
176.64	0.01584	0.01337	0.00976	0.01182
176.88	0.01591	0.01351	0.00956	0.01196
177.12	0.01572	0.0138	0.00965	0.01196
177.36	0.01598	0.01292	0.00937	0.01187
177.6	0.01597	0.01309	0.00936	0.01203
177.84	0.01569	0.01337	0.00939	0.01202
178.08	0.01602	0.01321	0.00963	0.01187
178.32	0.01594	0.01339	0.0094	0.01196
178.56	0.01589	0.01337	0.00958	0.01189
178.8	0.01575	0.01347	0.00954	0.01169
179.04	0.01612	0.01349	0.0097	0.01201
179.28	0.01597	0.0135	0.00993	0.01192
179.52	0.01591	0.01341	0.00975	0.01225
179.76	0.01597	0.0137	0.00952	0.01203
180	0.01556	0.0137	0.00972	0.012
180.24	0.01617	0.01361	0.00963	0.01172
180.48	0.016	0.01332	0.00965	0.01199
180.72	0.01606	0.01349	0.00987	0.01241
180.96	0.01611	0.01353	0.00965	0.01189
181.2	0.01613	0.0138	0.00976	0.01189
181.44	0.01606	0.01348	0.00955	0.01207
181.68	0.01602	0.01354	0.00965	0.01198
181.92	0.01602	0.01371	0.00994	0.01202
182.16	0.01614	0.01417	0.00967	0.01219
182.4	0.01607	0.01381	0.0096	0.01206
182.64	0.01583	0.01385	0.00967	0.012
182.88	0.01575	0.01392	0.00966	0.01196
183.12	0.01605	0.01359	0.00967	0.01193
183.36	0.01614	0.01355	0.00961	0.01174
183.6	0.01604	0.0136	0.0095	0.01195
183.84	0.01598	0.01379	0.00959	0.01196
184.08	0.01625	0.01396	0.00975	0.01203
184.32	0.016	0.01374	0.0098	0.01219
184.56	0.01578	0.0138	0.00966	0.01189
184.8	0.01591	0.01392	0.00981	0.01172
185.04	0.01641	0.01423	0.00942	0.01208
185.28	0.0161	0.01369	0.00962	0.01216
185.52	0.01577	0.01364	0.00974	0.01187
185.76	0.0162	0.01379	0.00983	0.01166
186	0.01641	0.01377	0.00979	0.01212
186.24	0.01583	0.01367	0.00954	0.01208
186.48	0.01568	0.01393	0.00977	0.01201
186.72	0.01606	0.01373	0.00956	0.01208
186.96	0.01616	0.01383	0.00992	0.01186
187.2	0.01608	0.01363	0.00981	0.01186
187.44	0.01628	0.01405	0.00964	0.01189
187.68	0.01583	0.01388	0.00981	0.01177
187.92	0.01612	0.01402	0.00976	0.01257
188.16	0.01643	0.01399	0.00962	0.01191
188.4	0.01613	0.01367	0.00948	0.01198
188.64	0.01634	0.01386	0.00971	0.01233
188.88	0.01613	0.01384	0.00979	0.01212
189.12	0.01635	0.01365	0.00956	0.01213
189.36	0.01628	0.01393	0.00975	0.01186
189.6	0.01647	0.01411	0.0097	0.01209
189.84	0.01627	0.01432	0.01002	0.01213
190.08	0.01619	0.01374	0.00968	0.01205
190.32	0.01634	0.01397	0.00965	0.01218
190.56	0.0164	0.01396	0.00965	0.01205
190.8	0.01678	0.01433	0.00987	0.01212
191.04	0.01581	0.0141	0.01007	0.01211
191.28	0.0163	0.01393	0.00969	0.01239
191.52	0.01599	0.0139	0.00969	0.01204
191.76	0.01627	0.01372	0.00967	0.01212
192	0.01645	0.01402	0.00965	0.01192
192.24	0.01641	0.0141	0.00983	0.01211
192.48	0.01633	0.01388	0.00976	0.01192
192.72	0.01632	0.01367	0.0098	0.01203
192.96	0.01646	0.01392	0.00989	0.01217
193.2	0.0161	0.01409	0.00998	0.01171
193.44	0.01637	0.01386	0.00969	0.01206
193.68	0.01694	0.01368	0.00996	0.01213
193.92	0.01646	0.01453	0.00981	0.01219
194.16	0.01624	0.01397	0.00998	0.01192
194.4	0.01628	0.01427	0.00948	0.01245
194.64	0.01659	0.0141	0.00998	0.01211
194.88	0.01638	0.01391	0.00965	0.0122
195.12	0.01618	0.01419	0.00983	0.01231
195.36	0.01654	0.01381	0.01	0.01237
195.6	0.01633	0.01369	0.00995	0.01224
195.84	0.01619	0.01433	0.00998	0.01222
196.08	0.01648	0.01409	0.00976	0.01242
196.32	0.01615	0.01413	0.01	0.01218
196.56	0.0164	0.01425	0.00974	0.01217
196.8	0.01633	0.01406	0.00979	0.01197
197.04	0.01638	0.01442	0.00964	0.0119
197.28	0.01615	0.014	0.00964	0.0119
197.52	0.01628	0.01416	0.00972	0.01215
197.76	0.01624	0.01424	0.00994	0.01216
198	0.01632	0.01432	0.00964	0.01181
198.24	0.01648	0.01385	0.00983	0.01209
198.48	0.01628	0.01406	0.0097	0.012
198.72	0.01639	0.01408	0.00991	0.01207
198.96	0.01626	0.01399	0.00975	0.01246
199.2	0.01618	0.01427	0.0101	0.01204
199.44	0.01661	0.01426	0.00983	0.01259
199.68	0.01631	0.01403	0.00981	0.01212
199.92	0.01633	0.01448	0.00965	0.01234
200.16	0.01656	0.01437	0.00975	0.01238
200.4	0.01615	0.0146	0.0099	0.01212
200.64	0.01644	0.01434	0.00991	0.01209
200.88	0.01646	0.0137	0.00998	0.01211
201.12	0.01622	0.01408	0.00969	0.01202
201.36	0.01634	0.01428	0.00979	0.01228
201.6	0.01634	0.01395	0.00974	0.01204
201.84	0.01645	0.01427	0.00983	0.01235
202.08	0.01644	0.01442	0.00986	0.0123
202.32	0.01646	0.01405	0.00979	0.01204
202.56	0.01632	0.0142	0.00981	0.01221
202.8	0.01681	0.01428	0.00987	0.01233
203.04	0.01629	0.01418	0.01013	0.01198
203.28	0.01627	0.01415	0.00994	0.01208
203.52	0.01615	0.01441	0.0096	0.01241
203.76	0.01657	0.01389	0.0098	0.01236
204	0.01639	0.01417	0.00975	0.01234
204.24	0.01647	0.01387	0.00967	0.01232
204.48	0.0167	0.01398	0.00975	0.0122
204.72	0.01658	0.01424	0.00965	0.01219
204.96	0.01649	0.01405	0.00977	0.01187
205.2	0.01652	0.01433	0.00996	0.01212
205.44	0.01629	0.01435	0.00988	0.01207
205.68	0.01604	0.01421	0.00991	0.01199
205.92	0.01643	0.01411	0.0095	0.0122
206.16	0.01632	0.01434	0.00997	0.01218
206.4	0.01662	0.01415	0.00987	0.01198
206.64	0.01626	0.01425	0.00962	0.01209
206.88	0.01635	0.01452	0.00988	0.0119
207.12	0.01636	0.01403	0.00993	0.01241
207.36	0.01588	0.01409	0.00975	0.01217
207.6	0.01661	0.01402	0.00994	0.01208
207.84	0.01655	0.01434	0.00999	0.0123
208.08	0.01651	0.01438	0.00944	0.0122
208.32	0.01626	0.01412	0.00993	0.01232
208.56	0.01631	0.01456	0.00975	0.01216
208.8	0.01663	0.0146	0.00957	0.01231
209.04	0.01602	0.0144	0.00965	0.01241
209.28	0.0167	0.01424	0.00961	0.0124
209.52	0.01651	0.01439	0.00984	0.01214
209.76	0.01654	0.01458	0.0099	0.01212
210	0.01667	0.01428	0.00998	0.01233
210.24	0.01621	0.01431	0.00973	0.01218
210.48	0.01662	0.01424	0.00989	0.01227
210.72	0.01658	0.01455	0.00985	0.01242
210.96	0.01652	0.01442	0.00971	0.01201
211.2	0.01637	0.01426	0.00985	0.01217
211.44	0.01626	0.0147	0.00986	0.01228
211.68	0.01611	0.01455	0.00961	0.01244
211.92	0.01674	0.01434	0.00975	0.01232
212.16	0.01602	0.01426	0.00986	0.01189
212.4	0.01665	0.01451	0.00954	0.0126
212.64	0.01596	0.01413	0.00971	0.01209
212.88	0.01649	0.0144	0.00979	0.0125
213.12	0.01658	0.01451	0.00967	0.01196
213.36	0.01614	0.01433	0.00986	0.0123
213.6	0.0168	0.01507	0.00965	0.01225
213.84	0.01669	0.01466	0.00997	0.01214
214.08	0.0163	0.01458	0.00968	0.012
214.32	0.01643	0.01428	0.00985	0.01235
214.56	0.01652	0.01478	0.00965	0.01231
214.8	0.01632	0.0146	0.00971	0.01196
215.04	0.01638	0.01422	0.00999	0.01189
215.28	0.01635	0.01423	0.00962	0.0124
215.52	0.01621	0.01458	0.00962	0.01244
215.76	0.01635	0.01456	0.0098	0.01206
216	0.01606	0.01438	0.00974	0.01211
216.24	0.01673	0.01434	0.00967	0.01235
216.48	0.01637	0.01449	0.00971	0.01236
216.72	0.01654	0.01447	0.00947	0.01232
216.96	0.01616	0.01435	0.0098	0.01221
217.2	0.01655	0.01484	0.00956	0.01222
217.44	0.01628	0.0146	0.00972	0.01213
217.68	0.01624	0.01432	0.01	0.01203
217.92	0.01658	0.01437	0.00951	0.01221
218.16	0.01602	0.01449	0.00983	0.01194
218.4	0.016	0.01452	0.00973	0.01207
218.64	0.0165	0.01461	0.00978	0.01183
218.88	0.01665	0.01455	0.01004	0.01227
219.12	0.01623	0.01478	0.00961	0.01196
219.36	0.01635	0.01464	0.0097	0.01207
219.6	0.01652	0.01454	0.0096	0.01213
219.84	0.01653	0.01408	0.00986	0.01239
220.08	0.01629	0.01443	0.00968	0.01223
220.32	0.01635	0.01447	0.00963	0.01204
220.56	0.01615	0.01485	0.00957	0.01208
220.8	0.01605	0.01444	0.00948	0.01242
221.04	0.0166	0.01387	0.00968	0.01229
221.28	0.01616	0.01425	0.00974	0.01221
221.52	0.01658	0.01445	0.00974	0.01234
221.76	0.01636	0.01463	0.00959	0.01269
222	0.01647	0.0143	0.00962	0.0122
222.24	0.01642	0.01431	0.0098	0.01231
222.48	0.01639	0.01454	0.00972	0.01246
222.72	0.01639	0.01439	0.0099	0.01202
222.96	0.01632	0.01434	0.00954	0.01225
223.2	0.01654	0.01457	0.00984	0.01244
223.44	0.01625	0.01461	0.00974	0.01223
223.68	0.01616	0.01463	0.00971	0.01204
223.92	0.01619	0.01452	0.00992	0.01218
224.16	0.01629	0.01452	0.0096	0.01246
224.4	0.01659	0.0148	0.00968	0.01224
224.64	0.0168	0.01456	0.00971	0.01233
224.88	0.01617	0.0146	0.0098	0.01211
225.12	0.01631	0.01493	0.0098	0.01186
225.36	0.01601	0.01451	0.00949	0.01189
225.6	0.01614	0.01441	0.00967	0.01218
225.84	0.01633	0.01453	0.00936	0.0123
226.08	0.01596	0.01482	0.00971	0.01202
226.32	0.01631	0.01462	0.00969	0.01226
226.56	0.01621	0.01455	0.00932	0.01194
226.8	0.01621	0.01452	0.00971	0.01199
227.04	0.01616	0.01474	0.00941	0.01215
227.28	0.0163	0.0143	0.00966	0.01237
227.52	0.01609	0.01455	0.00967	0.01209
227.76	0.01626	0.01478	0.00956	0.01238
228	0.0162	0.01443	0.00917	0.01216
228.24	0.01627	0.01419	0.00972	0.01269
228.48	0.01646	0.01419	0.00953	0.01201
228.72	0.01631	0.01438	0.00949	0.01232
228.96	0.01597	0.01451	0.00953	0.01223
229.2	0.01636	0.01442	0.00944	0.012
229.44	0.01641	0.01454	0.00963	0.01205
229.68	0.01634	0.01476	0.00972	0.01216
229.92	0.01643	0.01451	0.0095	0.01247
230.16	0.01613	0.01461	0.00985	0.01229
230.4	0.01647	0.01457	0.00955	0.01193
230.64	0.01613	0.01453	0.00965	0.01225
230.88	0.01616	0.01426	0.00974	0.01213
231.12	0.01644	0.01441	0.00951	0.01231
231.36	0.01661	0.01437	0.00949	0.01236
231.6	0.01641	0.01478	0.00955	0.01228
231.84	0.01628	0.01485	0.00983	0.01228
232.08	0.01642	0.01464	0.00942	0.0123
232.32	0.01628	0.01476	0.00941	0.01204
232.56	0.01633	0.0147	0.00966	0.01189
232.8	0.01645	0.01446	0.00965	0.01212
233.04	0.0163	0.01456	0.00986	0.01222
233.28	0.01591	0.01458	0.00953	0.01235
233.52	0.01634	0.01414	0.00965	0.01192
233.76	0.01628	0.01455	0.00935	0.01216
234	0.01643	0.01451	0.00973	0.01214
234.24	0.01638	0.0146	0.00986	0.01195
234.48	0.01626	0.01459	0.00958	0.0121
234.72	0.01616	0.01437	0.00956	0.01182
234.96	0.01628	0.01452	0.00959	0.01228
235.2	0.01611	0.01464	0.00953	0.01183
235.44	0.01649	0.01474	0.00919	0.01199
235.68	0.01638	0.01452	0.00964	0.0122
235.92	0.01601	0.01449	0.00934	0.01176
236.16	0.0161	0.0146	0.00953	0.0123
236.4	0.01633	0.01452	0.00946	0.01216
236.64	0.01635	0.01442	0.00962	0.01233
236.88	0.01602	0.01412	0.00956	0.01207
237.12	0.01604	0.01429	0.00926	0.01206
237.36	0.01613	0.01454	0.00963	0.01191
237.6	0.01603	0.01443	0.00958	0.01195
237.84	0.01611	0.0145	0.00984	0.01233
238.08	0.0163	0.01492	0.00957	0.01221
238.32	0.0162	0.01433	0.00938	0.012
238.56	0.01631	0.01434	0.00958	0.01223
238.8	0.01593	0.01447	0.00972	0.01225
239.04	0.01621	0.01466	0.00945	0.01204
239.28	0.01603	0.01439	0.00918	0.01264
239.52	0.01577	0.01465	0.00925	0.01254
239.76	0.01574	0.0143	0.00958	0.01216

## Sheet: M4R
Time	Exp1	Exp2	Exp3	Exp4
0	-0.00031	4e-05	-0.00014	9e-05
0.24	3e-05	-8e-05	3e-05	-0.00011
0.48	-4e-05	7e-05	0.00017	-4e-05
0.72	9e-05	6e-05	-0.00015	0.00012
0.96	0.00029	0.00026	1e-05	0.00015
1.2	-0.00016	1e-05	0.00013	0.00023
1.44	0.00015	0.00047	0.0002	0.0004
1.68	0.00023	0.00019	-8e-05	4e-05
1.92	-5e-05	-6e-05	0.00012	-5e-05
2.16	-0.00019	0.00021	0.00013	-3e-05
2.4	0.00013	0.00017	5e-05	0.00025
2.64	-0.00021	-0.00052	-0.00017	0.00015
2.88	-0.00032	-0.00028	2e-05	0
3.12	0.0001	-0.0002	-0.00013	-2e-05
3.36	4e-05	7e-05	0.00015	2e-05
3.6	0.00015	-0.00015	0.00011	0.00016
3.84	0.00026	0.00021	0.00019	2e-05
4.08	5e-05	-0.00011	5e-05	-0.00016
4.32	8e-05	1e-05	7e-05	2e-05
4.56	-0.00021	0	-0.0001	-0.00013
4.8	-9e-05	0.00016	-0.00016	-0.0003
5.04	-0.00021	-4e-05	-8e-05	4e-05
5.28	-0.0001	-0.00014	-2e-05	0.00044
5.52	0.00013	-8e-05	6e-05	-2e-05
5.76	0.00012	-4e-05	-3e-05	9e-05
6	0.00024	-9e-05	7e-05	-1e-05
6.24	0.00012	0.00011	-8e-05	0.00011
6.48	2e-05	-0.00022	-0.00021	-0.00031
6.72	0.0002	-0.00016	0	6e-05
6.96	0.00032	2e-05	-0.00014	-0.00013
7.2	-0.00016	0.0003	0	4e-05
7.44	-6e-05	-0.0002	1e-05	-6e-05
7.68	-9e-05	-3e-05	-0.00018	-1e-05
7.92	-0.0001	0.00017	1e-05	0.0001
8.16	0	5e-05	-0.00032	1e-05
8.4	-4e-05	1e-05	-1e-05	-0.00012
8.64	-0.00018	0.00035	2e-05	-8e-05
8.88	0.00024	9e-05	0	0.00014
9.12	4e-05	0.00019	7e-05	-0.00019
9.36	0.0001	-0.00012	-0.00011	0.00017
9.6	6e-05	-4e-05	-0.00022	-7e-05
9.84	-8e-05	-7e-05	6e-05	0.00025
10.08	7e-05	-6e-05	6e-05	3e-05
10.32	4e-05	4e-05	8e-05	-3e-05
10.56	-0.00011	-2e-05	0.00017	-0.0002
10.8	-2e-05	-0.00013	-0.00015	-0.00019
11.04	4e-05	0.00024	-8e-05	-0.00029
11.28	-8e-05	-0.0002	-3e-05	-9e-05
11.52	9e-05	0.00042	-2e-05	7e-05
11.76	-7e-05	-0.00016	-8e-05	0.00014
12	0.00011	-0.00019	-0.00012	2e-05
12.24	0.00012	0.00014	0.0003	-8e-05
12.48	-0.00017	-2e-05	-4e-05	-9e-05
12.72	-7e-05	-3e-05	9e-05	-0.0001
12.96	0.00016	0.0001	0.00017	9e-05
13.2	0.00014	-0.00023	2e-05	0.00012
13.44	4e-05	-6e-05	-0.00019	0.00019
13.68	-7e-05	4e-05	1e-05	-0.00013
13.92	8e-05	-0.00017	0.00016	5e-05
14.16	-0.00021	-0.00011	0.00011	0
14.4	2e-05	-0.00011	0.00034	3e-05
14.64	-2e-05	0.00011	8e-05	0.00011
14.88	-3e-05	0.00015	0.0001	-5e-05
15.12	-0.0001	-6e-05	5e-05	-3e-05
15.36	0.00017	2e-05	-1e-05	0.00017
15.6	4e-05	-9e-05	-0.00023	8e-05
15.84	0.00012	-0.0001	0.00033	5e-05
16.08	-1e-05	0	-0.00015	3e-05
16.32	0.0001	-0.00011	-0.00013	-0.00021
16.56	0.00012	-0.00021	8e-05	-0.00023
16.8	-5e-05	-3e-05	-0.00014	-0.00019
17.04	-2e-05	0.00019	-0.00015	-2e-05
17.28	-0.00018	4e-05	4e-05	-8e-05
17.52	-0.00024	-0.0004	-3e-05	0.0001
17.76	-6e-05	0.00012	9e-05	0
18	8e-05	-0.00037	2e-05	-8e-05
18.24	-1e-05	-5e-05	-7e-05	-4e-05
18.48	0.00013	-4e-05	-5e-05	-2e-05
18.72	5e-05	6e-05	-2e-05	-5e-05
18.96	0.00019	0	-7e-05	-2e-05
19.2	0.00012	1e-05	0.00012	0.00023
19.44	-0.00015	7e-05	0.00015	0.00017
19.68	5e-05	-7e-05	-0.00016	4e-05
19.92	6e-05	-0.00013	-0.0001	2e-05
20.16	-0.00025	0.00014	5e-05	4e-05
20.4	8e-05	0.00047	0.00013	-2e-05
20.64	7e-05	-0.00013	0.00021	-2e-05
20.88	5e-05	-0.00018	-0.00014	-0.0002
21.12	-1e-05	6e-05	9e-05	0.00011
21.36	5e-05	3e-05	0.00014	-0.00012
21.6	0	-6e-05	-2e-05	0.00012
21.84	-6e-05	0.00019	3e-05	-3e-05
22.08	-0.00023	0.0002	-0.00021	-7e-05
22.32	6e-05	-0.0003	-0.00022	-0.00013
22.56	-3e-05	7e-05	-0.00022	0.0002
22.8	-2e-05	4e-05	0.00018	0.00034
23.04	-4e-05	-8e-05	-0.00025	0.00016
23.28	2e-05	-2e-05	0.00019	1e-05
23.52	-0.00013	-6e-05	-7e-05	-2e-05
23.76	-0.00014	8e-05	-0.00018	-3e-05
24	-8e-05	5e-05	5e-05	9e-05
24.24	0.00018	2e-05	0.00017	0.00013
24.48	-0.00017	-0.00027	3e-05	-0.00028
24.72	-2e-05	4e-05	-6e-05	-0.00011
24.96	7e-05	-2e-05	7e-05	-0.00022
25.2	0.00016	8e-05	8e-05	-1e-05
25.44	3e-05	1e-05	-0.00019	-0.00014
25.68	0.00012	0.00016	0.00015	-0.00012
25.92	0.00012	-0.00023	1e-05	-0.00014
26.16	-0.00017	-0.00011	-0.00014	0.00036
26.4	0	0.0002	-0.00014	-0.00039
26.64	-8e-05	-0.00011	0.00011	8e-05
26.88	0	5e-05	9e-05	-0.00023
27.12	0	0.00031	7e-05	-7e-05
27.36	-7e-05	-9e-05	5e-05	0.00028
27.6	-4e-05	0.00022	-0.00011	-1e-05
27.84	0.0001	-0.00013	-3e-05	-0.00021
28.08	0.00028	1e-05	-0.00015	-2e-05
28.32	-0.00049	0	0.0001	-2e-05
28.56	-0.00038	0.00021	0.00017	3e-05
28.8	1e-05	0	0	-9e-05
29.04	-0.00014	1e-05	0.00023	-3e-05
29.28	-0.00025	-0.00032	2e-05	1e-05
29.52	7e-05	0.00015	0.00031	2e-05
29.76	0.00011	-8e-05	-7e-05	-0.00017
30	0.00082	0.00012	0.00056	-5e-05
30.24	0.00188	0.00142	0.00102	0.00124
30.48	0.00299	0.00287	0.00156	0.00196
30.72	-0.00546	-0.00599	-0.00714	-0.00557
30.96	-0.04686	-0.05019	-0.05012	-0.04533
31.2	0.02337	0.02416	0.02093	0.02429
31.44	-0.0121	-0.01252	-0.01452	-0.01158
31.68	0.00664	0.00698	0.00446	0.00556
31.92	0.00732	0.00747	0.00467	0.00607
32.16	0.00763	0.00793	0.00476	0.00616
32.4	0.00799	0.00848	0.00515	0.00681
32.64	0.00876	0.00871	0.00553	0.00695
32.88	0.00879	0.00872	0.00613	0.00727
33.12	0.00934	0.00941	0.00624	0.00783
33.36	0.00994	0.00996	0.00633	0.0079
33.6	0.01008	0.01055	0.00658	0.00857
33.84	0.01039	0.01053	0.00698	0.00844
34.08	0.01053	0.01094	0.00693	0.00861
34.32	0.01138	0.01121	0.00704	0.00917
34.56	0.01165	0.01132	0.00729	0.0092
34.8	0.01167	0.01143	0.00742	0.0092
35.04	0.01183	0.01145	0.00766	0.00953
35.28	0.01201	0.01174	0.00767	0.00997
35.52	0.0122	0.01248	0.00809	0.01041
35.76	0.01248	0.01201	0.008	0.01028
36	0.0128	0.01255	0.00833	0.01031
36.24	0.01242	0.01286	0.00822	0.01068
36.48	0.01307	0.01264	0.0084	0.01072
36.72	0.0131	0.01296	0.00829	0.01094
36.96	0.0133	0.01315	0.00829	0.01074
37.2	0.0136	0.01309	0.00854	0.01122
37.44	0.01348	0.01349	0.00878	0.0113
37.68	0.01342	0.01295	0.00881	0.01129
37.92	0.01388	0.0134	0.00886	0.0113
38.16	0.01361	0.01363	0.0088	0.0114
38.4	0.01418	0.01361	0.00898	0.01136
38.64	0.014	0.01373	0.00894	0.01172
38.88	0.01427	0.01397	0.00921	0.01114
39.12	0.0144	0.01406	0.00913	0.01147
39.36	0.01428	0.0137	0.00921	0.01149
39.6	0.0143	0.01401	0.00942	0.01175
39.84	0.01443	0.01406	0.00914	0.01164
40.08	0.01429	0.01353	0.00936	0.01155
40.32	0.01492	0.01467	0.00953	0.01209
40.56	0.01466	0.01423	0.00951	0.01223
40.8	0.01476	0.01439	0.00931	0.01209
41.04	0.01482	0.01418	0.0096	0.012
41.28	0.01506	0.01416	0.00956	0.01191
41.52	0.01502	0.01448	0.00957	0.01226
41.76	0.01494	0.01436	0.00954	0.01221
42	0.01509	0.01462	0.00968	0.01259
42.24	0.01521	0.01467	0.00981	0.01202
42.48	0.01527	0.01447	0.00967	0.01243
42.72	0.01498	0.01409	0.00958	0.01235
42.96	0.01495	0.01443	0.00959	0.01246
43.2	0.0151	0.0144	0.0098	0.01251
43.44	0.01498	0.01478	0.00987	0.01254
43.68	0.015	0.01469	0.00997	0.01284
43.92	0.0153	0.01474	0.00984	0.01273
44.16	0.01521	0.01483	0.00978	0.0125
44.4	0.01516	0.01476	0.00967	0.01287
44.64	0.01579	0.01501	0.00977	0.01273
44.88	0.01556	0.01508	0.00973	0.01264
45.12	0.01582	0.0151	0.00994	0.01268
45.36	0.01591	0.01532	0.0098	0.01261
45.6	0.01563	0.01496	0.01015	0.0128
45.84	0.01588	0.01483	0.00998	0.0126
46.08	0.0156	0.01526	0.01009	0.01318
46.32	0.01579	0.01504	0.01002	0.01303
46.56	0.016	0.01495	0.00996	0.01311
46.8	0.01586	0.01532	0.0101	0.013
47.04	0.01593	0.01506	0.01007	0.01319
47.28	0.01602	0.0152	0.01005	0.01325
47.52	0.0159	0.01513	0.01011	0.01307
47.76	0.01627	0.0151	0.01001	0.01297
48	0.01618	0.01473	0.01019	0.01285
48.24	0.01604	0.015	0.01028	0.01321
48.48	0.01642	0.01494	0.01003	0.01305
48.72	0.01613	0.01504	0.01037	0.01337
48.96	0.01608	0.01509	0.01025	0.01337
49.2	0.01591	0.01513	0.0102	0.01332
49.44	0.01615	0.01492	0.01017	0.01312
49.68	0.01627	0.01532	0.01017	0.01368
49.92	0.0162	0.0154	0.01015	0.01339
50.16	0.01612	0.01492	0.01035	0.01356
50.4	0.01607	0.0152	0.01047	0.01338
50.64	0.01667	0.015	0.01037	0.01361
50.88	0.0161	0.01529	0.01002	0.01343
51.12	0.01636	0.01538	0.01043	0.01349
51.36	0.01626	0.01546	0.01032	0.01349
51.6	0.0159	0.01508	0.01008	0.01383
51.84	0.01637	0.01509	0.01059	0.01302
52.08	0.01601	0.01508	0.01028	0.01336
52.32	0.01623	0.01551	0.01019	0.01351
52.56	0.01631	0.01563	0.01049	0.01338
52.8	0.01631	0.01501	0.01041	0.01343
53.04	0.0167	0.0154	0.01038	0.01371
53.28	0.01645	0.0154	0.01021	0.01374
53.52	0.0164	0.01536	0.01024	0.01383
53.76	0.01604	0.01556	0.01034	0.01342
54	0.01618	0.01573	0.01034	0.01353
54.24	0.01634	0.01579	0.01057	0.01351
54.48	0.0165	0.01536	0.01062	0.01328
54.72	0.01662	0.01528	0.01033	0.01351
54.96	0.01677	0.01536	0.01038	0.01304
55.2	0.01667	0.01544	0.01029	0.0133
55.44	0.01677	0.01561	0.01082	0.0134
55.68	0.01674	0.01557	0.01045	0.01361
55.92	0.01686	0.01541	0.01017	0.0135
56.16	0.01658	0.01583	0.01055	0.01341
56.4	0.01649	0.01532	0.01041	0.0134
56.64	0.01689	0.01543	0.01043	0.01342
56.88	0.01689	0.01557	0.0103	0.01352
57.12	0.01682	0.01582	0.01051	0.01363
57.36	0.01659	0.01545	0.01055	0.0134
57.6	0.01697	0.01535	0.0106	0.01375
57.84	0.01692	0.01578	0.01069	0.01377
58.08	0.0166	0.01581	0.01052	0.01366
58.32	0.01693	0.01546	0.01086	0.01372
58.56	0.01672	0.01566	0.01037	0.01359
58.8	0.01706	0.01566	0.01055	0.01364
59.04	0.01696	0.01586	0.01049	0.01364
59.28	0.01691	0.01564	0.01052	0.01378
59.52	0.01654	0.01568	0.01068	0.0133
59.76	0.0168	0.01525	0.01057	0.01361
60	0.01683	0.01548	0.01061	0.01351
60.24	0.01687	0.01537	0.01056	0.01341
60.48	0.0171	0.01532	0.01048	0.01352
60.72	0.01672	0.01541	0.01056	0.01362
60.96	0.01682	0.01556	0.0106	0.01359
61.2	0.01666	0.01581	0.0106	0.01374
61.44	0.01726	0.01565	0.0108	0.01367
61.68	0.01673	0.01538	0.01075	0.01377
61.92	0.01694	0.01569	0.01065	0.01346
62.16	0.01726	0.01594	0.01051	0.01415
62.4	0.01696	0.01532	0.01056	0.01356
62.64	0.0169	0.01544	0.01089	0.01386
62.88	0.017	0.01559	0.01058	0.01366
63.12	0.01684	0.0154	0.01068	0.01348
63.36	0.01725	0.01546	0.01085	0.01374
63.6	0.01702	0.01545	0.01064	0.01362
63.84	0.01732	0.01542	0.01076	0.01363
64.08	0.01685	0.01531	0.01068	0.01347
64.32	0.01665	0.01546	0.01069	0.01378
64.56	0.01687	0.01542	0.01064	0.01383
64.8	0.01699	0.01555	0.01059	0.01362
65.04	0.0172	0.01544	0.0108	0.0138
65.28	0.01692	0.01539	0.01077	0.01394
65.52	0.01717	0.01548	0.01068	0.01412
65.76	0.01709	0.01525	0.01071	0.01371
66	0.01695	0.01555	0.01059	0.01366
66.24	0.01693	0.01541	0.01083	0.01369
66.48	0.017	0.01598	0.01074	0.01371
66.72	0.01692	0.01558	0.01054	0.01352
66.96	0.01716	0.0159	0.01067	0.01372
67.2	0.01738	0.01567	0.01056	0.01365
67.44	0.01682	0.01554	0.01069	0.01379
67.68	0.01704	0.0154	0.01051	0.01366
67.92	0.01705	0.01532	0.0105	0.01367
68.16	0.01704	0.0156	0.0107	0.01388
68.4	0.01688	0.01539	0.01063	0.01381
68.64	0.01706	0.01535	0.01066	0.0135
68.88	0.01714	0.01556	0.01054	0.01355
69.12	0.01656	0.01544	0.01074	0.01351
69.36	0.01716	0.01571	0.01067	0.01365
69.6	0.01676	0.01539	0.01071	0.01372
69.84	0.01733	0.01554	0.01079	0.01399
70.08	0.01676	0.01551	0.01087	0.01386
70.32	0.01738	0.01525	0.01084	0.01327
70.56	0.01683	0.01556	0.01079	0.01343
70.8	0.017	0.01528	0.01097	0.01363
71.04	0.01716	0.01557	0.01073	0.01337
71.28	0.01683	0.01585	0.01069	0.01342
71.52	0.01708	0.01575	0.0109	0.01356
71.76	0.01697	0.01543	0.01064	0.01371
72	0.01741	0.01543	0.01069	0.01337
72.24	0.01715	0.01523	0.0105	0.01382
72.48	0.01706	0.0154	0.0107	0.01385
72.72	0.01703	0.01496	0.01084	0.01386
72.96	0.01718	0.01519	0.01074	0.01325
73.2	0.01736	0.01509	0.0111	0.0132
73.44	0.01699	0.01519	0.01091	0.01385
73.68	0.01725	0.01541	0.01057	0.01389
73.92	0.01707	0.01539	0.01086	0.01384
74.16	0.01714	0.01546	0.01088	0.01369
74.4	0.01732	0.01506	0.0106	0.01379
74.64	0.01727	0.01561	0.01065	0.01339
74.88	0.01705	0.01544	0.0107	0.0138
75.12	0.01729	0.01494	0.01061	0.01378
75.36	0.01736	0.01572	0.01086	0.01368
75.6	0.01725	0.01557	0.01071	0.0135
75.84	0.01724	0.01534	0.01082	0.01372
76.08	0.0175	0.01559	0.0108	0.0135
76.32	0.01698	0.0154	0.01096	0.01382
76.56	0.01721	0.01544	0.0108	0.01382
76.8	0.01722	0.01535	0.01078	0.0134
77.04	0.01706	0.0151	0.01049	0.0136
77.28	0.01695	0.01519	0.01093	0.01361
77.52	0.01675	0.01526	0.01081	0.0136
77.76	0.0172	0.01517	0.01096	0.01367
78	0.01725	0.01518	0.01081	0.01366
78.24	0.0171	0.0152	0.01083	0.0135
78.48	0.01689	0.01551	0.01082	0.01325
78.72	0.01748	0.01536	0.0108	0.01368
78.96	0.01703	0.01535	0.01082	0.01336
79.2	0.01714	0.01524	0.01096	0.01305
79.44	0.01722	0.01507	0.01064	0.01344
79.68	0.0168	0.01541	0.01051	0.01367
79.92	0.01707	0.01524	0.01092	0.01377
80.16	0.01724	0.01552	0.01093	0.01345
80.4	0.01729	0.01517	0.01083	0.01357
80.64	0.01747	0.01538	0.01102	0.01359
80.88	0.01725	0.01519	0.0109	0.01347
81.12	0.01687	0.01515	0.0109	0.01347
81.36	0.01718	0.01538	0.01068	0.01359
81.6	0.01699	0.01549	0.01089	0.01356
81.84	0.01734	0.01514	0.01101	0.01338
82.08	0.01727	0.01526	0.01085	0.01333
82.32	0.0172	0.01526	0.01081	0.01324
82.56	0.01703	0.01494	0.01097	0.01345
82.8	0.01705	0.01492	0.0108	0.01342
83.04	0.01719	0.01486	0.01081	0.01357
83.28	0.01753	0.01535	0.01094	0.01339
83.52	0.01713	0.01495	0.01067	0.01342
83.76	0.01714	0.01518	0.01074	0.01345
84	0.01729	0.01502	0.01099	0.01345
84.24	0.01689	0.01527	0.01087	0.01351
84.48	0.01707	0.01494	0.01052	0.01345
84.72	0.01735	0.01521	0.01073	0.01357
84.96	0.01692	0.01485	0.01073	0.01345
85.2	0.0169	0.01498	0.01072	0.01302
85.44	0.01709	0.01498	0.01069	0.0135
85.68	0.01693	0.01468	0.0107	0.01351
85.92	0.01712	0.01507	0.0108	0.01313
86.16	0.01718	0.01542	0.01079	0.01331
86.4	0.01699	0.01519	0.01095	0.01302
86.64	0.01732	0.01483	0.01065	0.01347
86.88	0.01713	0.01487	0.01062	0.01359
87.12	0.01743	0.01492	0.01082	0.01342
87.36	0.0168	0.01518	0.01103	0.01328
87.6	0.01743	0.01527	0.01079	0.01337
87.84	0.01695	0.01488	0.01064	0.01332
88.08	0.01709	0.01489	0.0105	0.01322
88.32	0.01747	0.01513	0.01082	0.01333
88.56	0.01697	0.01505	0.01083	0.01337
88.8	0.01704	0.01502	0.01081	0.01345
89.04	0.01719	0.01483	0.01076	0.01332
89.28	0.017	0.01486	0.01057	0.01353
89.52	0.0172	0.01517	0.01085	0.01321
89.76	0.01722	0.01513	0.01066	0.01333
90	0.01715	0.01496	0.01069	0.01324
90.24	0.01717	0.01486	0.01068	0.01301
90.48	0.01688	0.01475	0.0107	0.01325
90.72	0.0174	0.01488	0.01081	0.01321
90.96	0.01699	0.01485	0.01086	0.0135
91.2	0.0168	0.01489	0.01107	0.01331
91.44	0.01691	0.01495	0.01073	0.01344
91.68	0.01688	0.01499	0.01065	0.01322
91.92	0.01709	0.01452	0.01087	0.01318
92.16	0.01735	0.01441	0.01079	0.01343
92.4	0.01698	0.01492	0.01058	0.01335
92.64	0.01718	0.01492	0.01089	0.01311
92.88	0.01695	0.01493	0.01083	0.01308
93.12	0.01715	0.0147	0.01081	0.01315
93.36	0.01673	0.01434	0.01106	0.01317
93.6	0.01724	0.01495	0.01099	0.0133
93.84	0.01684	0.01489	0.01089	0.01326
94.08	0.01689	0.01477	0.01088	0.01295
94.32	0.01722	0.01477	0.01079	0.01315
94.56	0.01708	0.01466	0.01059	0.01323
94.8	0.01714	0.01476	0.01084	0.01289
95.04	0.01703	0.01466	0.01065	0.01318
95.28	0.01706	0.01464	0.01074	0.0129
95.52	0.01689	0.01456	0.01099	0.01288
95.76	0.0171	0.0151	0.01067	0.01364
96	0.01708	0.01502	0.01059	0.01299
96.24	0.0166	0.01489	0.01079	0.01334
96.48	0.01681	0.01476	0.0108	0.01319
96.72	0.01687	0.0146	0.01071	0.0133
96.96	0.01725	0.01461	0.0109	0.01289
97.2	0.01694	0.01481	0.01075	0.01311
97.44	0.01682	0.01446	0.01069	0.01322
97.68	0.01718	0.01456	0.01092	0.01299
97.92	0.01723	0.01432	0.01092	0.01303
98.16	0.01655	0.01466	0.01069	0.01318
98.4	0.01708	0.01475	0.0108	0.01304
98.64	0.01682	0.01489	0.01074	0.01272
98.88	0.0171	0.01484	0.01083	0.01317
99.12	0.01709	0.01486	0.01085	0.01314
99.36	0.01707	0.01509	0.01073	0.01308
99.6	0.01705	0.01461	0.01081	0.01321
99.84	0.01688	0.0146	0.01073	0.01295
100.08	0.01713	0.01481	0.01059	0.01304
100.32	0.01709	0.01446	0.01105	0.01294
100.56	0.01697	0.01473	0.01084	0.01279
100.8	0.01653	0.01422	0.01076	0.01298
101.04	0.01645	0.01432	0.01052	0.01301
101.28	0.01698	0.01424	0.01068	0.0132
101.52	0.01666	0.0145	0.01069	0.0127
101.76	0.01719	0.01472	0.01059	0.01302
102	0.01681	0.01438	0.01054	0.01291
102.24	0.01673	0.01453	0.01072	0.01276
102.48	0.01711	0.01453	0.01045	0.01279
102.72	0.01691	0.01444	0.01091	0.01289
102.96	0.01701	0.01455	0.01078	0.01303
103.2	0.01683	0.01414	0.01096	0.01302
103.44	0.01679	0.01459	0.01104	0.01322
103.68	0.01666	0.01425	0.0108	0.01306
103.92	0.01672	0.01425	0.01084	0.01317
104.16	0.01702	0.01424	0.01066	0.01267
104.4	0.01668	0.01462	0.01076	0.01318
104.64	0.01673	0.01453	0.0106	0.01317
104.88	0.01681	0.01457	0.01076	0.01314
105.12	0.01667	0.0144	0.011	0.01277
105.36	0.01676	0.01404	0.01078	0.01325
105.6	0.01701	0.01421	0.01066	0.01261
105.84	0.01669	0.01463	0.01062	0.01299
106.08	0.01695	0.01439	0.0108	0.01271
106.32	0.01693	0.01411	0.01072	0.01285
106.56	0.01666	0.01417	0.01077	0.01273
106.8	0.01682	0.01461	0.01043	0.01296
107.04	0.01656	0.01448	0.01089	0.01299
107.28	0.01677	0.01432	0.01073	0.01293
107.52	0.01655	0.01425	0.01082	0.01297
107.76	0.01673	0.01407	0.01068	0.01303
108	0.01636	0.01399	0.0107	0.01284
108.24	0.01692	0.01452	0.01071	0.01307
108.48	0.0165	0.01401	0.01064	0.01313
108.72	0.01679	0.01453	0.01093	0.01314
108.96	0.01675	0.01389	0.01071	0.01299
109.2	0.01659	0.01399	0.01071	0.01281
109.44	0.0167	0.01415	0.01077	0.01287
109.68	0.01675	0.01414	0.01063	0.01314
109.92	0.01652	0.01439	0.01035	0.01286
110.16	0.01681	0.01441	0.01085	0.01293
110.4	0.01657	0.01419	0.01032	0.01293
110.64	0.01654	0.01414	0.01074	0.01286
110.88	0.01622	0.01376	0.01091	0.01264
111.12	0.01684	0.01384	0.01066	0.01316
111.36	0.01703	0.01415	0.0105	0.01273
111.6	0.01655	0.01421	0.01066	0.01289
111.84	0.01676	0.01427	0.01067	0.01332
112.08	0.01645	0.01433	0.01066	0.01258
112.32	0.01683	0.01385	0.01069	0.01266
112.56	0.01627	0.01425	0.01076	0.01285
112.8	0.01702	0.01409	0.01062	0.0127
113.04	0.01681	0.01422	0.01059	0.01301
113.28	0.01676	0.01414	0.01051	0.01289
113.52	0.01677	0.01371	0.0105	0.01239
113.76	0.01644	0.01418	0.01058	0.01282
114	0.01666	0.01392	0.01058	0.0126
114.24	0.01674	0.0143	0.01065	0.01311
114.48	0.01682	0.01381	0.01029	0.01264
114.72	0.01674	0.01406	0.01043	0.01274
114.96	0.01687	0.01452	0.01077	0.01266
115.2	0.01657	0.0138	0.01074	0.01291
115.44	0.01631	0.01443	0.01064	0.01283
115.68	0.01644	0.01384	0.01057	0.01262
115.92	0.0165	0.01379	0.0105	0.01271
116.16	0.01633	0.01395	0.01044	0.01292
116.4	0.01643	0.01402	0.01057	0.01286
116.64	0.01654	0.01388	0.01068	0.01266
116.88	0.01647	0.01369	0.01041	0.01246
117.12	0.01622	0.01397	0.01081	0.01282
117.36	0.01632	0.01385	0.01053	0.01307
117.6	0.01643	0.01401	0.01049	0.01264
117.84	0.01665	0.01415	0.01052	0.01275
118.08	0.01645	0.01364	0.01075	0.0127
118.32	0.01618	0.01402	0.01041	0.01227
118.56	0.0162	0.01388	0.01081	0.01277
118.8	0.01647	0.01401	0.01058	0.01278
119.04	0.01662	0.01391	0.01048	0.01268
119.28	0.01673	0.01384	0.0108	0.01278
119.52	0.01613	0.01392	0.01053	0.0127
119.76	0.01662	0.01328	0.01043	0.01271
120	0.01677	0.01412	0.01092	0.01225
120.24	0.0162	0.01363	0.01057	0.01254
120.48	0.01648	0.01386	0.01076	0.01236
120.72	0.01617	0.01381	0.01027	0.01261
120.96	0.01633	0.01379	0.01078	0.01261
121.2	0.01625	0.01379	0.01024	0.01239
121.44	0.0166	0.01358	0.01052	0.01252
121.68	0.01663	0.0137	0.01054	0.0125
121.92	0.01644	0.01383	0.01056	0.01265
122.16	0.01624	0.01383	0.01044	0.01251
122.4	0.01632	0.01351	0.01077	0.01225
122.64	0.01657	0.01358	0.0102	0.01272
122.88	0.01625	0.0136	0.01044	0.01233
123.12	0.01646	0.01379	0.01034	0.01244
123.36	0.01637	0.0133	0.01047	0.0124
123.6	0.01625	0.01381	0.01041	0.01279
123.84	0.01667	0.01371	0.01029	0.0126
124.08	0.01602	0.01345	0.01036	0.01254
124.32	0.01613	0.01373	0.0108	0.0123
124.56	0.01637	0.01373	0.01066	0.01233
124.8	0.01654	0.01412	0.0105	0.01198
125.04	0.01618	0.01374	0.01041	0.01278
125.28	0.01616	0.01357	0.01051	0.01263
125.52	0.01629	0.01381	0.01053	0.01227
125.76	0.01592	0.01355	0.01059	0.0125
126	0.01613	0.01333	0.0102	0.01231
126.24	0.0165	0.01345	0.0102	0.01256
126.48	0.01618	0.01349	0.01048	0.01258
126.72	0.01605	0.01379	0.01051	0.01231
126.96	0.01653	0.01371	0.01062	0.01244
127.2	0.01626	0.01371	0.01014	0.01223
127.44	0.01637	0.01335	0.01021	0.01211
127.68	0.01631	0.01343	0.01062	0.01257
127.92	0.01617	0.01338	0.01057	0.01275
128.16	0.01656	0.01345	0.01052	0.01236
128.4	0.0165	0.01345	0.01046	0.01245
128.64	0.01603	0.01332	0.01032	0.01226
128.88	0.01621	0.01332	0.01039	0.01239
129.12	0.01598	0.01339	0.01036	0.01256
129.36	0.01624	0.01331	0.01053	0.01226
129.6	0.01625	0.0134	0.01062	0.01223
129.84	0.01596	0.01368	0.01039	0.01229
130.08	0.01617	0.01334	0.01043	0.01232
130.32	0.01654	0.01326	0.01049	0.01212
130.56	0.01615	0.01329	0.01074	0.01256
130.8	0.0163	0.01377	0.01057	0.01241
131.04	0.01625	0.01346	0.01046	0.01242
131.28	0.0161	0.01328	0.01042	0.01222
131.52	0.01598	0.01303	0.01049	0.01219
131.76	0.01613	0.01321	0.01019	0.0121
132	0.01611	0.01328	0.01035	0.01233
132.24	0.01626	0.01329	0.01043	0.01184
132.48	0.01635	0.0131	0.01067	0.01197
132.72	0.01612	0.01364	0.01035	0.01215
132.96	0.01636	0.01334	0.01044	0.01216
133.2	0.01598	0.01334	0.0103	0.01237
133.44	0.01603	0.01323	0.01023	0.01224
133.68	0.01654	0.0137	0.01029	0.01204
133.92	0.016	0.01339	0.01032	0.01217
134.16	0.01627	0.01317	0.01057	0.01231
134.4	0.01602	0.0132	0.0102	0.01216
134.64	0.0164	0.01337	0.01081	0.01214
134.88	0.01606	0.01317	0.01026	0.01204
135.12	0.01615	0.01339	0.01039	0.01209
135.36	0.0159	0.01323	0.01052	0.01187
135.6	0.01578	0.01352	0.0102	0.01212
135.84	0.01622	0.01325	0.01038	0.01204
136.08	0.01612	0.01321	0.01041	0.01199
136.32	0.01631	0.01335	0.01012	0.01198
136.56	0.01619	0.01322	0.0104	0.01249
136.8	0.01584	0.01314	0.0105	0.01188
137.04	0.01588	0.01314	0.01047	0.01216
137.28	0.01598	0.01305	0.01062	0.01207
137.52	0.01598	0.01272	0.01036	0.012
137.76	0.01596	0.01329	0.01002	0.0123
138	0.01572	0.01289	0.01038	0.01197
138.24	0.01599	0.01307	0.01031	0.01217
138.48	0.01628	0.01281	0.01032	0.01199
138.72	0.01581	0.01297	0.01017	0.01212
138.96	0.01579	0.01287	0.01045	0.01199
139.2	0.01594	0.01296	0.01012	0.01191
139.44	0.01613	0.01268	0.01033	0.01221
139.68	0.01589	0.01321	0.01044	0.012
139.92	0.01583	0.01294	0.01025	0.01194
140.16	0.01592	0.01312	0.01033	0.01239
140.4	0.01592	0.01313	0.0104	0.01193
140.64	0.01596	0.01288	0.01009	0.0119
140.88	0.01614	0.01273	0.01043	0.0121
141.12	0.01574	0.01316	0.01021	0.01228
141.36	0.01586	0.01296	0.01029	0.01199
141.6	0.01605	0.01287	0.01019	0.01196
141.84	0.01578	0.01256	0.01025	0.01212
142.08	0.01571	0.01297	0.01016	0.01182
142.32	0.01596	0.01281	0.01038	0.01207
142.56	0.01593	0.01298	0.01051	0.01186
142.8	0.0158	0.01278	0.0105	0.01196
143.04	0.0159	0.01298	0.01058	0.01196
143.28	0.01551	0.01233	0.01039	0.01193
143.52	0.01602	0.01261	0.01029	0.01171
143.76	0.01602	0.01282	0.01031	0.01182
144	0.01533	0.01249	0.01015	0.01189
144.24	0.01587	0.01278	0.01032	0.01199
144.48	0.01595	0.0127	0.01032	0.01222
144.72	0.01602	0.01244	0.00991	0.01198
144.96	0.0159	0.01269	0.01023	0.01212
145.2	0.01574	0.01294	0.0106	0.01179
145.44	0.01567	0.0126	0.01033	0.01203
145.68	0.0158	0.01231	0.01031	0.01205
145.92	0.01553	0.01251	0.0104	0.01181
146.16	0.0158	0.01255	0.01032	0.01207
146.4	0.01564	0.01259	0.01019	0.01203
146.64	0.01522	0.01245	0.01019	0.01173
146.88	0.0159	0.01224	0.00998	0.01188
147.12	0.01539	0.01244	0.01003	0.01191
147.36	0.01578	0.0125	0.00994	0.01182
147.6	0.01559	0.01218	0.00985	0.01162
147.84	0.01566	0.01223	0.01037	0.01167
148.08	0.01577	0.01266	0.01032	0.01195
148.32	0.01559	0.01272	0.01009	0.01202
148.56	0.0155	0.01287	0.01017	0.01229
148.8	0.01568	0.01287	0.01013	0.01178
149.04	0.01561	0.01236	0.01014	0.01178
149.28	0.01585	0.01254	0.01021	0.01202
149.52	0.01572	0.01246	0.00995	0.01192
149.76	0.01564	0.01231	0.01006	0.01195
150	0.01617	0.01274	0.0105	0.01214
150.24	0.01615	0.01311	0.01052	0.01278
150.48	0.01562	0.01265	0.0107	0.01289
150.72	0.00453	0.0009	-0.00075	0.00209
150.96	-0.04173	-0.04622	-0.04655	-0.04078
151.2	0.03738	0.03366	0.03003	0.03462
151.44	-0.00358	-0.00397	-0.00642	-0.00569
151.68	0.01623	0.01676	0.01429	0.01283
151.92	0.01608	0.01289	0.0107	0.0128
152.16	0.01594	0.01276	0.01049	0.01277
152.4	0.01613	0.01251	0.01034	0.01252
152.64	0.01595	0.01291	0.01034	0.01271
152.88	0.01603	0.01251	0.01063	0.01245
153.12	0.01583	0.01262	0.01053	0.01266
153.36	0.01605	0.01257	0.01061	0.01284
153.6	0.01595	0.01261	0.01052	0.0122
153.84	0.0156	0.01237	0.01042	0.01248
154.08	0.01588	0.01248	0.01036	0.01279
154.32	0.01602	0.0124	0.01026	0.0124
154.56	0.01581	0.01223	0.01054	0.01272
154.8	0.01551	0.01264	0.01054	0.01251
155.04	0.01582	0.01238	0.01055	0.01257
155.28	0.01567	0.01241	0.01047	0.01248
155.52	0.0158	0.01233	0.01046	0.01259
155.76	0.01579	0.01227	0.01034	0.01297
156	0.01585	0.01236	0.01095	0.01263
156.24	0.01592	0.01264	0.01041	0.01232
156.48	0.01565	0.01247	0.01037	0.01247
156.72	0.01549	0.01245	0.01043	0.01244
156.96	0.01576	0.01241	0.0106	0.01211
157.2	0.01601	0.01211	0.01016	0.01259
157.44	0.01584	0.01237	0.0104	0.01261
157.68	0.01586	0.01222	0.0103	0.01245
157.92	0.01617	0.01231	0.01051	0.01251
158.16	0.01586	0.01237	0.0105	0.01237
158.4	0.01563	0.01244	0.01035	0.01227
158.64	0.01573	0.0123	0.01034	0.01232
158.88	0.01578	0.01253	0.01037	0.01256
159.12	0.01575	0.0122	0.0105	0.01236
159.36	0.01548	0.01249	0.01026	0.01251
159.6	0.01549	0.01234	0.0104	0.01223
159.84	0.01594	0.01208	0.01042	0.0122
160.08	0.01519	0.01178	0.01049	0.01236
160.32	0.01581	0.01219	0.01046	0.01272
160.56	0.01576	0.01225	0.01036	0.01235
160.8	0.01552	0.01223	0.01052	0.01258
161.04	0.01582	0.01232	0.01027	0.01253
161.28	0.0157	0.01252	0.01065	0.01244
161.52	0.01558	0.01274	0.01042	0.01262
161.76	0.01566	0.0115	0.01038	0.01236
162	0.01576	0.01222	0.01052	0.01264
162.24	0.0155	0.01224	0.01036	0.0125
162.48	0.01576	0.01232	0.01016	0.01227
162.72	0.01578	0.01216	0.01041	0.01232
162.96	0.01542	0.01203	0.01021	0.01238
163.2	0.01575	0.01205	0.01024	0.01271
163.44	0.01546	0.01214	0.01013	0.01232
163.68	0.0156	0.01207	0.01047	0.01203
163.92	0.01557	0.01196	0.0103	0.01233
164.16	0.01593	0.01228	0.01023	0.01232
164.4	0.01524	0.01176	0.01028	0.01204
164.64	0.01547	0.01188	0.01008	0.01208
164.88	0.0155	0.01174	0.01016	0.01205
165.12	0.0156	0.01192	0.01049	0.0125
165.36	0.01561	0.01178	0.01042	0.0123
165.6	0.01569	0.01229	0.01018	0.01216
165.84	0.01503	0.01205	0.01011	0.01214
166.08	0.01546	0.01196	0.01025	0.01221
166.32	0.01542	0.01189	0.01037	0.01219
166.56	0.01576	0.01164	0.01023	0.01204
166.8	0.01552	0.01184	0.01044	0.0119
167.04	0.01561	0.01183	0.01018	0.01225
167.28	0.01547	0.01181	0.00989	0.01221
167.52	0.01581	0.01158	0.01023	0.01231
167.76	0.01512	0.01197	0.01026	0.01206
168	0.01535	0.01184	0.01022	0.01204
168.24	0.01537	0.01128	0.01026	0.01191
168.48	0.01552	0.01133	0.01025	0.01231
168.72	0.01547	0.0119	0.01013	0.01197
168.96	0.01536	0.0117	0.01006	0.01231
169.2	0.01549	0.01214	0.01011	0.01207
169.44	0.01531	0.01189	0.01023	0.01219
169.68	0.01525	0.01175	0.01014	0.01168
169.92	0.0152	0.01209	0.0102	0.01249
170.16	0.01509	0.0122	0.01017	0.01202
170.4	0.01526	0.01163	0.01013	0.01182
170.64	0.01539	0.01164	0.0104	0.01183
170.88	0.01545	0.01156	0.00986	0.01226
171.12	0.01541	0.01195	0.01022	0.012
171.36	0.01526	0.01185	0.01022	0.01246
171.6	0.01507	0.01176	0.0098	0.01194
171.84	0.01509	0.01162	0.01013	0.01223
172.08	0.01548	0.01171	0.01008	0.01223
172.32	0.01567	0.01158	0.00995	0.01206
172.56	0.01505	0.01164	0.00997	0.01229
172.8	0.01495	0.01197	0.01018	0.01242
173.04	0.01508	0.01105	0.01004	0.01229
173.28	0.01496	0.01165	0.01026	0.01191
173.52	0.01527	0.01185	0.00983	0.01178
173.76	0.01499	0.01146	0.01015	0.01183
174	0.01524	0.01161	0.00995	0.01226
174.24	0.01524	0.01177	0.01006	0.01187
174.48	0.01575	0.01135	0.00996	0.01183
174.72	0.01515	0.01144	0.00993	0.01203
174.96	0.01512	0.01176	0.00999	0.01192
175.2	0.01531	0.01167	0.00986	0.01194
175.44	0.01535	0.01165	0.00965	0.01193
175.68	0.015	0.01144	0.01004	0.01207
175.92	0.01488	0.01123	0.00998	0.01192
176.16	0.0154	0.01167	0.01014	0.01203
176.4	0.01507	0.01141	0.0099	0.01187
176.64	0.01536	0.01138	0.00986	0.012
176.88	0.01552	0.01175	0.00972	0.01184
177.12	0.01505	0.01096	0.00992	0.01205
177.36	0.01514	0.01113	0.0099	0.01193
177.6	0.01516	0.01119	0.01002	0.012
177.84	0.01492	0.01154	0.01016	0.01169
178.08	0.01533	0.01132	0.00997	0.01178
178.32	0.0149	0.01128	0.00982	0.01183
178.56	0.01531	0.01165	0.01024	0.01173
178.8	0.01485	0.01084	0.01	0.01166
179.04	0.01523	0.01147	0.01006	0.01199
179.28	0.015	0.01119	0.00963	0.01165
179.52	0.01501	0.01172	0.00961	0.01163
179.76	0.01514	0.01117	0.0099	0.01171
180	0.01516	0.01075	0.00969	0.01186
180.24	0.01473	0.01112	0.00959	0.01172
180.48	0.01524	0.01102	0.01012	0.01148
180.72	0.01508	0.01111	0.00977	0.01174
180.96	0.01476	0.01101	0.00983	0.01163
181.2	0.01505	0.01074	0.00976	0.01174
181.44	0.01503	0.01127	0.00971	0.01161
181.68	0.0153	0.0113	0.00973	0.01152
181.92	0.01504	0.01097	0.00997	0.01172
182.16	0.01469	0.01104	0.00972	0.01166
182.4	0.01518	0.01107	0.0097	0.01183
182.64	0.01489	0.01107	0.00981	0.01139
182.88	0.01522	0.01131	0.00995	0.01152
183.12	0.01492	0.01145	0.00996	0.01131
183.36	0.01509	0.01081	0.00971	0.0119
183.6	0.01488	0.011	0.00991	0.01122
183.84	0.01475	0.01129	0.00958	0.01118
184.08	0.01474	0.01088	0.00985	0.01151
184.32	0.01492	0.01097	0.01	0.01193
184.56	0.015	0.01079	0.00969	0.01159
184.8	0.01447	0.01052	0.00967	0.01164
185.04	0.01473	0.01122	0.00981	0.01155
185.28	0.01508	0.01142	0.00963	0.0117
185.52	0.01508	0.01099	0.00944	0.01148
185.76	0.01483	0.01122	0.00967	0.01171
186	0.01476	0.01103	0.00966	0.01149
186.24	0.01484	0.01048	0.00952	0.01165
186.48	0.01474	0.01103	0.00979	0.01172
186.72	0.01492	0.01072	0.00984	0.01165
186.96	0.01498	0.01127	0.00978	0.01131
187.2	0.01482	0.01101	0.00951	0.01169
187.44	0.01502	0.01067	0.00966	0.01186
187.68	0.01432	0.0108	0.00985	0.01186
187.92	0.01472	0.01101	0.0095	0.0116
188.16	0.01467	0.01106	0.00941	0.01147
188.4	0.01462	0.01096	0.00952	0.01193
188.64	0.01439	0.01081	0.00978	0.01155
188.88	0.01454	0.01082	0.00938	0.01149
189.12	0.01499	0.01086	0.00957	0.01158
189.36	0.01472	0.01058	0.00964	0.01133
189.6	0.01494	0.01042	0.00969	0.01138
189.84	0.01479	0.01088	0.00965	0.01134
190.08	0.01499	0.01072	0.00963	0.01164
190.32	0.01482	0.01085	0.00945	0.01136
190.56	0.01452	0.01109	0.00965	0.01137
190.8	0.01481	0.01124	0.00973	0.01105
191.04	0.01471	0.01063	0.00957	0.01118
191.28	0.01507	0.01066	0.00953	0.01133
191.52	0.01465	0.01089	0.00934	0.01116
191.76	0.01482	0.01076	0.00953	0.01139
192	0.01491	0.01068	0.00974	0.01135
192.24	0.01473	0.01074	0.00969	0.01161
192.48	0.01459	0.01084	0.00983	0.01116
192.72	0.01501	0.01065	0.00957	0.01137
192.96	0.01454	0.0107	0.00955	0.01119
193.2	0.01473	0.01038	0.00941	0.01149
193.44	0.01472	0.01067	0.00977	0.01139
193.68	0.01469	0.0106	0.00928	0.01159
193.92	0.01467	0.0106	0.00957	0.01127
194.16	0.01461	0.0106	0.00948	0.01148
194.4	0.01476	0.0104	0.00934	0.01123
194.64	0.01472	0.01038	0.00961	0.01106
194.88	0.01474	0.01071	0.00982	0.01136
195.12	0.01431	0.01111	0.0096	0.01133
195.36	0.0146	0.01064	0.00937	0.01146
195.6	0.01469	0.01047	0.00951	0.01148
195.84	0.01449	0.01038	0.00963	0.01116
196.08	0.01452	0.01028	0.0096	0.01135
196.32	0.01469	0.01052	0.00924	0.01121
196.56	0.01471	0.01043	0.00961	0.01128
196.8	0.01478	0.01028	0.00947	0.01144
197.04	0.01469	0.01056	0.00926	0.01102
197.28	0.01448	0.01054	0.00929	0.01153
197.52	0.01384	0.01026	0.00964	0.01126
197.76	0.01463	0.01053	0.00933	0.01099
198	0.01442	0.01046	0.00937	0.01098
198.24	0.01428	0.01022	0.00944	0.01156
198.48	0.01476	0.01052	0.00944	0.01171
198.72	0.01482	0.01035	0.00941	0.01155
198.96	0.01471	0.01029	0.00937	0.01118
199.2	0.01459	0.01035	0.00954	0.01122
199.44	0.01466	0.01051	0.00951	0.01128
199.68	0.01436	0.01008	0.0095	0.01123
199.92	0.01479	0.01035	0.00929	0.01108
200.16	0.01467	0.01031	0.00942	0.01095
200.4	0.01464	0.00993	0.00913	0.01081
200.64	0.0144	0.01029	0.00923	0.01105
200.88	0.01475	0.01039	0.00939	0.01088
201.12	0.01462	0.0103	0.00964	0.01137
201.36	0.01468	0.0104	0.00931	0.0114
201.6	0.01476	0.01085	0.00931	0.01112
201.84	0.01475	0.01033	0.00936	0.01119
202.08	0.01464	0.01004	0.00946	0.01106
202.32	0.01476	0.01036	0.00929	0.01137
202.56	0.01441	0.00998	0.00919	0.01109
202.8	0.01449	0.01023	0.00924	0.01106
203.04	0.01432	0.01022	0.00939	0.01132
203.28	0.01412	0.01027	0.00929	0.01102
203.52	0.01447	0.01029	0.00927	0.01095
203.76	0.01426	0.00948	0.00946	0.01115
204	0.01433	0.01029	0.00918	0.01093
204.24	0.01426	0.01028	0.00951	0.01098
204.48	0.01472	0.01045	0.00919	0.01111
204.72	0.01467	0.01	0.00925	0.01135
204.96	0.01445	0.00989	0.00923	0.01122
205.2	0.01454	0.00985	0.00936	0.01088
205.44	0.01444	0.01041	0.00911	0.0107
205.68	0.01415	0.01003	0.00899	0.01117
205.92	0.01432	0.01032	0.0095	0.01116
206.16	0.01448	0.01032	0.00946	0.01094
206.4	0.01423	0.01022	0.00937	0.01108
206.64	0.01418	0.01001	0.00943	0.01064
206.88	0.01432	0.01002	0.00917	0.01092
207.12	0.01415	0.01007	0.00917	0.01112
207.36	0.01411	0.0101	0.00921	0.01083
207.6	0.01431	0.00991	0.00921	0.01093
207.84	0.01435	0.01004	0.00926	0.01072
208.08	0.0145	0.00997	0.00929	0.01106
208.32	0.01432	0.00996	0.00916	0.0108
208.56	0.01404	0.00987	0.00947	0.01062
208.8	0.01433	0.00979	0.00897	0.01093
209.04	0.01424	0.0098	0.00915	0.01095
209.28	0.01463	0.00977	0.00914	0.01079
209.52	0.01404	0.0096	0.00908	0.01085
209.76	0.01445	0.00996	0.00931	0.01082
210	0.01424	0.00959	0.00942	0.0111
210.24	0.01416	0.01	0.00944	0.01079
210.48	0.0144	0.00979	0.00908	0.01085
210.72	0.01436	0.01002	0.00935	0.0112
210.96	0.01449	0.00979	0.00917	0.01089
211.2	0.01433	0.00988	0.00931	0.01133
211.44	0.01431	0.00976	0.00917	0.01074
211.68	0.01418	0.00978	0.00891	0.01092
211.92	0.01403	0.00964	0.00911	0.01111
212.16	0.01446	0.00984	0.00918	0.01077
212.4	0.01433	0.00983	0.0092	0.01088
212.64	0.01392	0.00943	0.00894	0.01062
212.88	0.01412	0.00961	0.00923	0.01039
213.12	0.01427	0.0097	0.0091	0.01092
213.36	0.01431	0.00982	0.00917	0.01099
213.6	0.01433	0.01013	0.00892	0.01092
213.84	0.01403	0.00937	0.00924	0.01073
214.08	0.01375	0.00969	0.00907	0.011
214.32	0.01414	0.0097	0.0092	0.01102
214.56	0.01422	0.00936	0.00924	0.01076
214.8	0.01412	0.00952	0.00911	0.01077
215.04	0.01415	0.00989	0.00921	0.01086
215.28	0.01431	0.0096	0.00913	0.01083
215.52	0.01437	0.00968	0.00926	0.01081
215.76	0.01419	0.00969	0.00894	0.01027
216	0.0138	0.01002	0.00931	0.01079
216.24	0.01454	0.00976	0.00915	0.01045
216.48	0.01404	0.00963	0.0092	0.01073
216.72	0.01409	0.00985	0.00929	0.01089
216.96	0.01418	0.00976	0.00902	0.01076
217.2	0.01387	0.00986	0.00888	0.01039
217.44	0.01399	0.00915	0.00913	0.01101
217.68	0.01398	0.00959	0.00911	0.01082
217.92	0.0142	0.00974	0.00906	0.01072
218.16	0.01398	0.00962	0.00924	0.01091
218.4	0.01396	0.00955	0.00886	0.01074
218.64	0.01455	0.00964	0.00913	0.01087
218.88	0.01382	0.00966	0.00894	0.01063
219.12	0.0137	0.00945	0.00911	0.01059
219.36	0.01409	0.00962	0.00897	0.01049
219.6	0.01416	0.00998	0.00865	0.01058
219.84	0.01397	0.00947	0.00929	0.01058
220.08	0.01416	0.0095	0.00919	0.01055
220.32	0.01407	0.00941	0.00889	0.01041
220.56	0.01416	0.00949	0.00882	0.01063
220.8	0.0138	0.00928	0.00875	0.01077
221.04	0.01403	0.00925	0.00917	0.01068
221.28	0.01423	0.01012	0.00907	0.01056
221.52	0.0139	0.00933	0.00918	0.01052
221.76	0.0143	0.00978	0.00933	0.01061
222	0.01385	0.00921	0.00887	0.0108
222.24	0.01377	0.00935	0.00892	0.01057
222.48	0.01418	0.00959	0.0088	0.01045
222.72	0.01413	0.00922	0.00882	0.01084
222.96	0.01391	0.00931	0.00894	0.01082
223.2	0.01396	0.00952	0.00898	0.01072
223.44	0.01371	0.00931	0.00896	0.01039
223.68	0.01369	0.00932	0.00901	0.01062
223.92	0.01392	0.00924	0.00885	0.01017
224.16	0.01339	0.0095	0.00878	0.01043
224.4	0.0139	0.00922	0.00917	0.01047
224.64	0.01349	0.00944	0.00856	0.01053
224.88	0.01416	0.00916	0.00891	0.01052
225.12	0.01426	0.00938	0.00866	0.01037
225.36	0.01388	0.00932	0.00862	0.01067
225.6	0.01347	0.0095	0.00886	0.0103
225.84	0.01416	0.00917	0.00872	0.01035
226.08	0.01368	0.0091	0.00913	0.0106
226.32	0.01415	0.00918	0.00908	0.01037
226.56	0.0138	0.0092	0.00878	0.01032
226.8	0.01363	0.0091	0.0089	0.01054
227.04	0.01391	0.00942	0.00877	0.01039
227.28	0.01377	0.00916	0.00873	0.01033
227.52	0.01381	0.00946	0.0087	0.01035
227.76	0.01353	0.00931	0.00895	0.01042
228	0.01363	0.00919	0.00866	0.01061
228.24	0.01419	0.00945	0.00912	0.01004
228.48	0.01368	0.00923	0.00872	0.0105
228.72	0.01381	0.00921	0.00895	0.01046
228.96	0.014	0.00929	0.00889	0.0105
229.2	0.01423	0.00967	0.00882	0.01033
229.44	0.01397	0.00858	0.00907	0.01012
229.68	0.01366	0.00898	0.0088	0.01039
229.92	0.01366	0.00923	0.00909	0.01042
230.16	0.01357	0.00911	0.00887	0.0107
230.4	0.01365	0.0089	0.00868	0.01027
230.64	0.01386	0.0092	0.00897	0.01026
230.88	0.01372	0.00903	0.00884	0.01045
231.12	0.0136	0.00906	0.00871	0.01032
231.36	0.01368	0.00893	0.00879	0.01073
231.6	0.01349	0.00914	0.00852	0.01063
231.84	0.0137	0.00897	0.00882	0.01037
232.08	0.01327	0.00915	0.00876	0.01024
232.32	0.01349	0.0092	0.00896	0.0103
232.56	0.01386	0.00869	0.00899	0.01035
232.8	0.01358	0.00886	0.00863	0.01017
233.04	0.01342	0.00878	0.00879	0.01035
233.28	0.01389	0.00911	0.00854	0.01011
233.52	0.01356	0.00897	0.00881	0.01031
233.76	0.01374	0.00937	0.00876	0.01018
234	0.0137	0.00926	0.00883	0.01013
234.24	0.01381	0.00923	0.00863	0.01034
234.48	0.01343	0.00902	0.00887	0.01038
234.72	0.01352	0.00922	0.00882	0.01037
234.96	0.01366	0.00895	0.0089	0.01024
235.2	0.01344	0.00908	0.0088	0.01019
235.44	0.01378	0.00908	0.00848	0.01063
235.68	0.01368	0.00927	0.00848	0.01009
235.92	0.01416	0.00862	0.00854	0.00985
236.16	0.0134	0.00877	0.00871	0.01016
236.4	0.01359	0.00899	0.00873	0.01019
236.64	0.01331	0.00896	0.00876	0.01033
236.88	0.01387	0.00896	0.00862	0.0102
237.12	0.01359	0.00899	0.00849	0.01022
237.36	0.01348	0.00883	0.0087	0.00987
237.6	0.01334	0.00911	0.0088	0.01021
237.84	0.01345	0.00871	0.0086	0.01033
238.08	0.01369	0.00891	0.00871	0.01043
238.32	0.01367	0.00912	0.00871	0.01012
238.56	0.0136	0.00873	0.0088	0.00996
238.8	0.01364	0.00847	0.00836	0.01013
239.04	0.01373	0.00873	0.0085	0.01034
239.28	0.01359	0.00861	0.00841	0.01045
239.52	0.01348	0.00856	0.00848	0.01013
239.76	0.0135	0.00851	0.00876	0.01054

## Sheet: Bar Graph
		Exp1	Exp2	Exp3	Exp4
GIV GBA		0.01086	0.01124	0.008	0.00957
AGS1*		0.01526	0.01632	0.00955	0.01254
Ric-8A*		-0.00127	-0.00068	-0.00103
R12 GL		0.00713	0.00674	0.00571	0.00725
M4R		0.0165	0.01381	0.01053	0.01263
