# Supplementary material for: Complementary biosensors reveal different G-protein signaling modes triggered by GPCRs and non-receptor activators
Source: eLife. 2021 Mar 31;10:e65620. doi: 10.7554/eLife.65620 (PMC8034979; doi:10.7554/eLife.65620)
Supplement: Figure 3—figure supplement 1—source data 1. [file elife-65620-fig3-figsupp1-data1.xlsx]

## Sheet: Grb2 GBA
	WT		FA
Time	Exp1	Exp2	Exp1	Exp2
0	-5.20794e-05	0.000172797	-0.00018474	0.000601449
0.24	0.000200498	-0.000110947	0.000430349	0.00054332
0.48	0.000434288	6.66625e-05	0.000176304	0.000616011
0.72	-0.000449385	0.000459462	0.000513609	-0.000220186
0.96	-0.000672578	6.97233e-05	0.000310288	1.14806e-05
1.2	0.000359852	0.000634147	0.000402732	0.00041678
1.44	0.000363543	-0.000155828	8.73961e-05	0.000162675
1.68	0.000392808	0.000481163	0.000483272	0.000162785
1.92	0.00021561	0.00041778	-0.000409438	-3.85611e-05
2.16	0.000269959	0.00062304	4.02537e-05	-9.40972e-05
2.4	-0.000400954	0.000556917	0.000600175	0.000214479
2.64	-0.000278412	0.00023308	-0.000416752	-0.000117037
2.88	0.000583207	-7.10464e-05	0.000431697	5.53696e-05
3.12	-8.02365e-05	-0.00010438	-0.000147977	-2.49158e-05
3.36	0.000467647	-5.81798e-05	-0.000140576	-0.000315293
3.6	0.000118677	0.000842652	0.000248394	0.000432056
3.84	0.000213916	0.000374667	0.000212899	0.000152997
4.08	0.000112533	-4.41088e-05	0.000164905	0.000372635
4.32	0.000166201	-4.63458e-05	2.00709e-05	9.98687e-05
4.56	0.000328429	0.000192134	-4.9944e-05	0.000130365
4.8	0.000141642	0.000409753	-0.000109559	0.00031391
5.04	0.000862111	7.4078e-05	-0.000265582	-5.10296e-06
5.28	0.000579148	4.77193e-06	3.66023e-05	-0.000343048
5.52	0.00032924	2.40043e-05	-0.000376208	0.000143836
5.76	0.000378892	0.000125912	-0.000379222	0.000391372
6	-0.000166984	0.000481771	-0.000485486	0.000270333
6.24	-0.00016661	-0.000349172	0.000471083	-2.84998e-05
6.48	0.000950934	0.000380676	0.000399545	0.000209516
6.72	-5.1722e-05	0.000263995	-0.000367941	0.000215581
6.96	-0.000267226	0.000534167	-0.000427363	0.000749602
7.2	-0.000374405	4.40554e-05	0.000270919	0.000152349
7.44	0.000735642	0.000359334	0.000218698	-0.000420965
7.68	0.000274153	-3.9206e-05	-0.000325904	6.76367e-06
7.92	0.00019732	-0.000334087	0.000387503	0.000100884
8.16	-5.14369e-05	5.42746e-05	0.000165881	0.000396645
8.4	0.000207774	-8.34476e-05	-0.000211559	-0.000221266
8.64	0.000417104	-0.000501429	0.00079821	8.48198e-05
8.88	7.55161e-05	-4.09167e-05	1.45459e-05	0.000518066
9.12	0.000316607	0.00046077	-5.574e-05	-8.95511e-05
9.36	0.000233411	-0.000304003	4.72965e-05	0.000348815
9.6	-0.00028158	0.000283021	1.19584e-05	0.000765797
9.84	-0.00057665	2.17818e-05	-2.23093e-06	0.00061409
10.08	0.000326516	-0.000416851	3.66023e-05	-4.05968e-05
10.32	-9.92519e-05	0.000584137	-0.000114506	1.79268e-05
10.56	-0.000377796	2.32738e-05	0.000521211	-0.000148915
10.8	-0.000111819	0.000495803	0.000817713	0.000487821
11.04	-0.000132029	6.49866e-05	0.000267022	0.000222198
11.28	0.000181381	-0.000262455	0.000506001	-7.06718e-05
11.52	4.71805e-05	-0.000379159	0.000325103	4.04966e-06
11.76	-0.000475955	-7.98847e-05	-0.000374224	-0.000175895
12	0.000610212	0.000130797	-3.6943e-05	0.000115478
12.24	-0.000545039	0.000132927	-0.00014612	-0.000393392
12.48	0.000481379	0.000394494	0.000531878	-0.00010087
12.72	-0.000655912	0.000234547	-8.04318e-05	0.000466707
12.96	-3.60962e-05	-0.000544684	0.000487719	-0.000594795
13.2	-0.000589889	-0.000294416	-0.000574509	-0.000662029
13.44	-9.23526e-05	0.000156871	0.000789782	-2.39759e-05
13.68	0.00022847	0.000135618	0.000129633	4.76247e-05
13.92	0.000273888	3.09645e-05	-0.000404443	0.000341308
14.16	-0.000173159	-0.000224513	-0.000148159	1.96084e-05
14.4	0.000302069	-0.000427994	0.000135541	0.00027471
14.64	-0.000269124	-0.000454387	0.000213553	1.32653e-05
14.88	-0.000208558	2.77873e-05	-7.15242e-05	0.000111963
15.12	-6.61227e-05	-0.000239963	-0.000716262	0.00068307
15.36	0.000550062	0.000135059	-9.43965e-05	9.26833e-05
15.6	-0.000309913	-0.000567277	0.000354903	-5.84871e-05
15.84	0.000294824	0.000178783	-0.000312773	3.3731e-05
16.08	0.000200249	-0.000356681	0.000688849	0.000256292
16.32	0.000119672	-6.67746e-05	-0.000373691	-0.000193415
16.56	-8.33109e-05	-8.56033e-05	0.000237743	2.17918e-05
16.8	0.000216996	-0.000184811	-0.0002532	-0.000158587
17.04	-0.000330646	0.000114549	0.000446466	0.000100573
17.28	-0.000136918	0.000250936	-0.000214444	0.000107637
17.52	0.000278131	0.000523048	0.000199396	1.05816e-05
17.76	-0.000464361	0.000268163	2.25539e-05	-0.000151077
18	0.0002773	0.000260874	-0.000328123	0.000408022
18.24	0.000147977	-8.68012e-05	0.000324433	-0.000241189
18.48	-0.000133312	0.000408331	0.00029555	0.000215428
18.72	0.000322537	-2.22285e-05	0.00039743	0.000122499
18.96	-1.76942e-05	0.000242308	0.000102641	-0.000227164
19.2	0.000814846	-5.93704e-06	-0.0004903	-0.000127264
19.44	7.53963e-05	-0.000301848	-8.49735e-05	-7.87909e-05
19.68	-1.33018e-05	-0.000262199	0.000513599	8.13103e-05
19.92	0.000696568	0.000267611	-0.000367334	-0.000348498
20.16	-0.000371197	-0.00049009	-0.000156776	-5.38203e-05
20.4	0.000318542	-0.000152727	0.000475402	-0.000345089
20.64	-0.0002519	-0.000443031	-0.000124459	-0.000253383
20.88	-0.000348168	-5.88815e-05	-0.000635885	-0.000236209
21.12	-9.50635e-05	0.000133325	0.000658651	0.000157406
21.36	0.000634952	0.000324641	-0.000703713	-8.41864e-05
21.6	4.60744e-05	-6.97794e-05	-0.000765469	-0.000715393
21.84	0.000171311	-0.000128583	-0.000393445	0.000183282
22.08	-0.000178271	-2.8633e-05	0.000246156	2.0732e-05
22.32	-0.000399521	-0.000499477	0.000369951	-0.000498532
22.56	0.000201338	2.06181e-05	-1.08345e-05	-0.000160418
22.8	-0.000557879	-5.12059e-05	0.000188976	-0.000238027
23.04	-0.000267646	-0.00034135	4.86614e-05	-8.71617e-05
23.28	-0.000535131	4.85978e-05	-0.000241392	-0.000193833
23.52	0.000330029	0.00020386	-1.92956e-06	-0.000503259
23.76	-0.00031083	6.01645e-05	-0.000531964	-0.000407866
24	-0.000271472	-0.000840751	0.000688123	1.26516e-05
24.24	-0.000218831	-0.000228145	-0.00038567	-8.14884e-05
24.48	-0.000251569	0.000220661	0.000113757	0.000288877
24.72	-0.000294261	-6.01517e-05	-0.000447968	-0.000469421
24.96	-0.000421124	0.000262302	-0.000519842	-0.000204502
25.2	-0.000640866	-0.000214959	-0.000425402	0.00036089
25.44	-0.000677962	7.13081e-05	-0.000173323	-0.000383341
25.68	0.000426106	-0.000267296	0.000316336	-0.000518191
25.92	0.000196234	-0.000795434	-0.000306832	-0.000174943
26.16	-8.64062e-05	-0.000279153	-0.000424092	-0.000492099
26.4	1.74911e-05	-8.85333e-05	-0.000574849	0.000111062
26.64	0.000464189	-0.000231994	0.00013869	-3.32909e-05
26.88	-0.000738073	4.45376e-05	-9.26591e-05	-0.000372053
27.12	-0.000653408	6.6633e-05	0.000449371	0.000132093
27.36	0.00061138	-0.00031673	-0.000483023	0.000268294
27.6	6.45816e-05	-0.000416583	-0.000856494	-0.000694059
27.84	7.17348e-05	-0.000414629	-0.000868614	-0.000121877
28.08	-1.99383e-05	-0.000407197	0.000145119	-0.000584707
28.32	-0.000138149	-0.00039382	-0.000507332	0.000148277
28.56	-0.000862016	-2.84524e-05	-0.000177438	-0.000138972
28.8	-0.000358052	0.000275779	0.000417003	-0.000310275
29.04	-0.000922894	-0.000212538	-0.000428019	-0.000335184
29.28	-2.51535e-05	-0.000308996	-0.000148049	-0.000667011
29.52	-0.0004864	0.000186448	-0.000375373	-0.000293104
29.76	-0.000351277	-0.00035065	0.000757318	0.000171336
30	-5.12101e-05	9.19583e-05	0.000142777	1.54454e-05
30.24	-0.000151397	-0.000213024	0.000158046	-0.000152077
30.48	0.000250137	-0.000112507	0.000266716	-0.000506118
30.72	-0.0146823	-0.0148981	-0.00973532	-0.0106818
30.96	0.042896	-0.0949934	0.0641307	0.0527623
31.2	-0.0792352	-0.0779531	-0.0628808	-0.0650783
31.44	0.173191	0.164709	0.1607	0.155483
31.68	0.019974	0.0183608	0.0180239	0.0174454
31.92	-0.000262347	-0.000199956	6.73381e-05	-0.000113861
32.16	-0.000281229	-0.000484128	-0.000337636	-0.000192923
32.4	-7.74156e-05	-0.000353011	0.000533783	-0.000450009
32.64	6.68651e-05	-0.000235332	-0.000247444	0.00042702
32.88	0.000296839	0.000214567	4.40033e-05	-0.000169275
33.12	0.00027245	-4.87661e-05	-0.000112623	-0.000408203
33.36	0.000370749	4.95455e-05	-0.000685068	0.000391895
33.6	0.000311329	-2.84426e-05	-0.000316044	0.00010445
33.84	-3.60113e-05	-0.000235545	-0.000449398	0.000160242
34.08	-0.000328304	7.52348e-06	-0.000229593	-0.000308235
34.32	0.000332913	-0.000178547	-0.000428158	-0.000182374
34.56	-0.000107317	-7.90687e-05	-0.000740875	0.000300347
34.8	0.000413637	-0.000349316	0.000343924	-0.000524187
35.04	-0.000230969	0.000117059	-0.000264622	0.000107677
35.28	0.000714563	0.000237675	0.000199072	-0.000262274
35.52	-5.15692e-05	-1.09714e-05	-0.000377577	-0.000524693
35.76	0.000518493	0.000139032	-3.33773e-05	-0.000467128
36	0.000458188	-7.00291e-05	-0.00028827	4.17393e-05
36.24	0.000592981	0.000317472	-0.000164672	0.000162617
36.48	0.000829189	-0.000204793	4.40033e-05	6.76688e-05
36.72	0.00124251	0.000901515	-0.000429974	-0.000265876
36.96	0.000537179	-0.000123135	2.78622e-05	-0.000411649
37.2	0.000245846	0.000349988	-0.000267048	-0.000114435
37.44	0.000484252	0.00081797	0.000672584	-0.000309601
37.68	0.00101008	0.000208091	-0.00052743	7.38663e-05
37.92	0.000810771	0.000738871	-0.000133496	-9.19743e-05
38.16	0.00101827	0.000302075	-7.87987e-05	0.000225047
38.4	0.000526694	0.00139351	1.36564e-05	-0.000167436
38.64	0.0019206	0.000373718	-0.000347475	-0.000371308
38.88	0.000432648	0.000438057	5.20472e-05	-0.000308526
39.12	0.00111046	0.000366427	0.000416991	1.9743e-05
39.36	0.000750338	0.000712283	-5.94073e-05	6.99473e-05
39.6	0.000871236	0.00113983	-4.29893e-05	-0.000154329
39.84	0.00118501	0.00123195	0.00059943	0.000132504
40.08	0.00128579	0.00113831	-0.000277702	-0.00040063
40.32	0.00162261	0.000972499	0.000117491	4.98968e-05
40.56	0.00101923	0.000785797	0.000393403	-0.000153735
40.8	0.00157365	0.00158057	-0.00101179	-0.000391686
41.04	0.00170481	0.00109133	-0.000325833	0.000146275
41.28	0.00151037	0.0007518	-0.00021651	-0.000388266
41.52	0.00206619	0.000859171	3.94098e-05	3.70293e-05
41.76	0.00212354	0.00160226	-5.99248e-05	0.000190678
42	0.00215216	0.00100342	0.000390398	-0.00010909
42.24	0.0014415	0.00156337	0.000555739	0.000246194
42.48	0.00169998	0.00119523	0.000474487	-0.000275061
42.72	0.0019103	0.000900983	-0.000327349	3.7777e-05
42.96	0.00248451	0.00182067	-6.97556e-05	-3.45252e-05
43.2	0.00159033	0.000927243	-4.54248e-05	2.63627e-05
43.44	0.00198417	0.00154938	-0.000138885	-0.000822667
43.68	0.00216797	0.00121651	-0.00016945	0.000330875
43.92	0.00160538	0.00127639	0.000399743	-0.000326457
44.16	0.00175557	0.00146121	0.000365349	3.60378e-05
44.4	0.00208592	0.00139996	0.000314786	0.000294775
44.64	0.00205949	0.0013561	0.000372852	0.000415571
44.88	0.00154615	0.0010605	4.18767e-05	-0.000398688
45.12	0.00161234	0.00142925	6.69739e-05	-0.000468199
45.36	0.00203062	0.00139538	-5.33225e-05	-0.000379661
45.6	0.00238764	0.00163248	-8.66288e-05	0.000308768
45.84	0.00232299	0.00152218	0.000135115	-0.000226869
46.08	0.00220524	0.00159877	-0.000183906	0.000325134
46.32	0.0028224	0.00163282	-2.07977e-05	0.000311468
46.56	0.00298151	0.00234796	0.000201047	6.45252e-05
46.8	0.00250709	0.00193549	0.000438647	-0.000293589
47.04	0.0029773	0.00166309	-9.48166e-05	0.000124354
47.28	0.00202047	0.00194239	-0.000208774	-1.57863e-05
47.52	0.00245967	0.00186117	0.000172383	7.27173e-05
47.76	0.0023991	0.00180244	0.000807913	0.000160646
48	0.00257743	0.00178494	0.000716855	0.000320947
48.24	0.00256258	0.00223147	-0.000250195	-0.000182469
48.48	0.00222517	0.00237603	-0.00027156	2.31462e-05
48.72	0.00282891	0.00225792	0.000114039	-0.000727875
48.96	0.00301501	0.0024698	-7.75658e-05	-0.000405395
49.2	0.00244769	0.00154525	0.000588811	0.000229737
49.44	0.00219844	0.0019159	0.000546435	0.000266081
49.68	0.00257862	0.0021302	-0.000118293	0.00024189
49.92	0.00300942	0.00194736	-0.000212794	-0.000134814
50.16	0.00291445	0.0019539	0.00047597	-0.000150257
50.4	0.00305558	0.00208824	0.000142151	0.000273433
50.64	0.00260435	0.00237745	0.000418177	0.000170106
50.88	0.00303739	0.00283493	-0.000112638	0.00020902
51.12	0.00317712	0.00203615	0.000738992	-2.31092e-05
51.36	0.00310037	0.00218125	-0.000127916	0.000291446
51.6	0.00323153	0.00223457	0.000432033	-0.000101546
51.84	0.00321241	0.00230122	4.97405e-05	-9.38756e-05
52.08	0.00259188	0.00185777	0.000887933	-7.02903e-05
52.32	0.00304856	0.00261341	0.000379037	0.000538668
52.56	0.00291005	0.00183341	8.28193e-05	0.000116253
52.8	0.00210634	0.00213117	0.000482159	0.000203451
53.04	0.00352474	0.00213605	0.000289485	-8.60369e-05
53.28	0.00340471	0.00218556	0.00035215	5.2907e-05
53.52	0.00350272	0.00268641	-0.00020771	0.000467
53.76	0.00290169	0.00270756	0.00051984	0.00042498
54	0.00301223	0.00218748	0.000609229	0.000480273
54.24	0.00354827	0.00238083	-1.35143e-06	0.000325179
54.48	0.00339078	0.00220998	0.000284218	0.000345677
54.72	0.00316349	0.00294548	0.000308349	0.000141464
54.96	0.00314813	0.00259261	6.43293e-05	0.000549412
55.2	0.00265251	0.00289759	0.000868869	0.00015813
55.44	0.00344303	0.00227672	-0.000418655	-1.61573e-05
55.68	0.00310337	0.00277234	0.000570039	0.00027443
55.92	0.00330347	0.00244325	0.000515126	0.000499769
56.16	0.00387235	0.00217127	-0.000408492	0.000104415
56.4	0.00356368	0.0029684	0.000309587	6.2874e-05
56.64	0.00376108	0.00251179	0.000428783	2.77723e-05
56.88	0.0027881	0.00291824	0.000477391	0.000245535
57.12	0.00326613	0.00272723	0.000130608	0.000487253
57.36	0.0032087	0.00307301	2.89038e-05	0.000358
57.6	0.0033684	0.00224586	0.000105769	7.18276e-05
57.84	0.00398649	0.00263695	-0.000455932	0.000464211
58.08	0.00373321	0.00261141	7.39185e-05	0.000795105
58.32	0.00282128	0.00263613	-3.26714e-06	8.77459e-05
58.56	0.00325923	0.0028586	-2.6845e-05	-8.76108e-05
58.8	0.00393024	0.00235215	0.00030617	0.000242024
59.04	0.00347668	0.00235822	0.000412866	2.05449e-05
59.28	0.00361705	0.00221826	0.000477425	0.000666844
59.52	0.00385942	0.00302573	-0.000118619	0.000145039
59.76	0.00391513	0.00264591	0.000351706	-0.000182462
60	0.00387028	0.00297972	0.000195912	-0.000343387
60.24	0.00309084	0.00231529	0.00052613	4.32146e-05
60.48	0.00416713	0.00296695	-0.000169582	-4.1191e-06
60.72	0.00355628	0.00290601	0.000216506	6.14071e-05
60.96	0.00372106	0.00338389	0.000724637	0.000592018
61.2	0.00348605	0.00321815	-9.92883e-05	0.000287274
61.44	0.00387538	0.00310703	0.000529274	7.31126e-05
61.68	0.0038512	0.00305616	0.000703996	0.000234635
61.92	0.00362315	0.0034629	-6.01995e-05	0.000378742
62.16	0.00372955	0.00269981	-0.000501724	0.000672666
62.4	0.00362295	0.00280244	0.000269273	0.000306147
62.64	0.00332057	0.00256692	2.3999e-05	1.929e-05
62.88	0.00353254	0.00307416	0.00031226	0.000225735
63.12	0.00389548	0.00283861	-0.000660054	0.000271729
63.36	0.00386233	0.00269708	0.000321416	0.000424785
63.6	0.00392605	0.00221009	-7.22113e-05	0.000136176
63.84	0.00458007	0.00406918	0.000581282	2.94434e-08
64.08	0.0037995	0.00302352	0.000239337	0.000149923
64.32	0.00368649	0.00315306	0.000343275	0.000168052
64.56	0.00347239	0.00307549	0.000729225	6.3658e-05
64.8	0.00382423	0.00293707	0.000729127	0.000474405
65.04	0.00305588	0.00278541	0.000942934	-0.000145226
65.28	0.00432516	0.0031871	-0.000264785	0.000389756
65.52	0.00451822	0.00297037	-0.000282214	-3.06624e-05
65.76	0.00463913	0.0031204	0.00050883	0.000293563
66	0.00362849	0.00299894	-0.000206712	0.000234172
66.24	0.00370652	0.0029319	0.000311705	-0.00031832
66.48	0.00469462	0.00274101	0.000471004	-1.24595e-05
66.72	0.004146	0.00263131	0.000204758	0.000305833
66.96	0.00417838	0.00289528	0.000359092	0.000208307
67.2	0.00435811	0.00334013	5.1589e-05	0.000488575
67.44	0.0046916	0.00305881	0.000215826	-3.46226e-05
67.68	0.00421829	0.00359557	0.000805636	0.000215465
67.92	0.00450537	0.00365121	0.00104038	0.000615504
68.16	0.00470087	0.00338911	6.16324e-05	0.000154155
68.4	0.00351724	0.00402815	0.00048668	-8.22303e-05
68.64	0.00407934	0.00303798	0.000406331	0.000487901
68.88	0.00399434	0.00368564	0.001013	0.000956561
69.12	0.00396999	0.00328118	0.000254587	0.000115483
69.36	0.00394573	0.00298902	0.00077399	0.000662606
69.6	0.00393301	0.0031265	-0.000120932	0.000156107
69.84	0.00422145	0.00291529	0.000206118	0.000418784
70.08	0.00458526	0.00344901	0.000575142	-3.35556e-05
70.32	0.00405323	0.00385073	0.000589417	0.000258322
70.56	0.00461901	0.00328352	0.000311612	0.000417983
70.8	0.00430003	0.00344257	0.000240847	0.000177592
71.04	0.0042039	0.00310257	0.000223085	0.000121269
71.28	0.00414819	0.0039482	0.000470863	0.000321075
71.52	0.00379406	0.00381042	0.000893991	-0.000183483
71.76	0.00458996	0.00284118	0.000693734	0.000507785
72	0.00496317	0.003392	0.00101935	8.50311e-05
72.24	0.00410797	0.00276567	0.000908875	2.1442e-05
72.48	0.00436926	0.00368055	0.000436143	0.000361907
72.72	0.0033412	0.00300202	0.000165946	0.000258319
72.96	0.00499859	0.00346482	0.000500892	5.32177e-05
73.2	0.00473272	0.00344746	-7.18466e-05	0.000598505
73.44	0.00468516	0.00350203	0.000271642	0.000473281
73.68	0.0041789	0.00299235	0.0010274	0.000263588
73.92	0.00404535	0.00408992	0.000235045	0.000433646
74.16	0.00429393	0.00340036	0.000843635	0.000833419
74.4	0.0042413	0.00318025	0.000245911	0.000212677
74.64	0.00396334	0.00361849	5.09386e-05	-0.000250668
74.88	0.00435143	0.00332482	0.000165626	0.000381379
75.12	0.0042825	0.00334473	0.00064477	0.000388256
75.36	0.00425886	0.00286944	-0.000519502	0.000529152
75.6	0.00451949	0.003267	0.000434473	0.000513779
75.84	0.00417605	0.00330868	0.000254349	0.000104849
76.08	0.00413704	0.00356008	-0.000324194	-6.18223e-05
76.32	0.00430005	0.00328247	0.000640108	9.28919e-05
76.56	0.00413741	0.00342512	0.000258552	0.00020708
76.8	0.00451852	0.00368314	0.000538847	-6.1172e-05
77.04	0.00434501	0.00318817	0.000583215	0.000148739
77.28	0.00439289	0.00388093	4.31571e-05	0.000484628
77.52	0.00481348	0.00371463	0.000595965	0.000487066
77.76	0.0045209	0.00333347	0.000350057	-0.000168436
78	0.00485365	0.00318482	0.000950938	-0.000106653
78.24	0.00445215	0.00305071	0.000352202	0.000732866
78.48	0.00457581	0.00352337	0.00128096	0.000300898
78.72	0.00413809	0.00326969	0.000649919	0.000151038
78.96	0.0043712	0.00344936	0.000307706	0.000381824
79.2	0.00460212	0.00286602	7.13547e-05	-4.74131e-05
79.44	0.0042424	0.00347371	0.000467528	-0.000494396
79.68	0.00498243	0.00332133	0.000689583	0.000132947
79.92	0.00515607	0.00403457	0.000881327	0.000540305
80.16	0.00519307	0.00339688	0.000481796	0.000135392
80.4	0.00482556	0.00305708	0.00053888	0.000246375
80.64	0.00463354	0.00392862	0.000388283	-4.73303e-05
80.88	0.00482039	0.00346327	0.000578563	-8.60274e-05
81.12	0.00443541	0.00396289	0.000217478	0.00094558
81.36	0.00428904	0.0028499	0.000729059	-0.000233409
81.6	0.00498082	0.00346531	0.000610351	0.000235406
81.84	0.00444299	0.00316303	0.000589792	0.000611227
82.08	0.00467906	0.00429113	0.00180272	0.000150239
82.32	0.00532992	0.00289171	-3.64185e-05	0.000448432
82.56	0.00485263	0.00340428	0.000242502	0.000296865
82.8	0.00479395	0.00365929	0.00091164	0.000356739
83.04	0.00461786	0.00326842	0.000584975	0.000435409
83.28	0.00495554	0.00337092	0.000834078	0.000613615
83.52	0.00445567	0.00387531	7.74702e-05	6.65992e-05
83.76	0.00520353	0.00352985	0.000278396	0.000569287
84	0.00478302	0.00344047	0.000408755	-0.000133568
84.24	0.00513465	0.00388582	0.000912003	0.000183265
84.48	0.00475245	0.00343846	0.00021831	0.000791155
84.72	0.00473694	0.00325138	0.000996817	0.000280653
84.96	0.0050983	0.00361581	0.000752049	0.00017489
85.2	0.00468047	0.00377648	0.000362947	0.00091976
85.44	0.00489065	0.00364425	0.000593007	0.000291991
85.68	0.00474209	0.00338362	9.13989e-05	0.000142972
85.92	0.0046449	0.00339657	-0.000241115	0.000502413
86.16	0.00535423	0.00382118	0.000635992	0.00089749
86.4	0.00492077	0.00379189	5.34605e-05	0.000141388
86.64	0.00441068	0.00358949	0.000777185	0.000216914
86.88	0.00485555	0.00356752	0.00072791	4.8743e-05
87.12	0.00478359	0.00304853	0.000526251	1.40171e-05
87.36	0.00502406	0.0033527	0.000802659	0.000245742
87.6	0.00533248	0.00334332	0.000713458	-0.000137813
87.84	0.00453297	0.00349704	0.000774478	0.000736439
88.08	0.00534555	0.00377741	0.00122438	-0.000170434
88.32	0.0053867	0.00347663	0.000257491	0.000135329
88.56	0.00510634	0.00380029	7.0336e-05	0.000248092
88.8	0.00461418	0.00348413	0.000667981	0.000693698
89.04	0.00444288	0.00331532	0.000378279	0.000266943
89.28	0.00532215	0.00374794	0.000537352	0.000359704
89.52	0.00468434	0.00333743	0.00106293	0.000643556
89.76	0.0047928	0.003221	0.000518302	-1.75695e-05
90	0.00493943	0.00375058	0.000550169	0.000681105
90.24	0.00512013	0.00375093	0.000460911	0.000448355
90.48	0.00415112	0.00391959	0.000437134	0.000348981
90.72	0.00433385	0.00392813	0.000355886	0.000208808
90.96	0.00512013	0.00327076	0.000268203	8.15185e-05
91.2	0.00478471	0.00346867	0.000921748	-0.000217697
91.44	0.0053229	0.0033085	0.000261961	0.00072456
91.68	0.00484532	0.0033912	0.000995994	0.000461502
91.92	0.00543977	0.00379762	0.000634593	0.000755546
92.16	0.00533459	0.00332336	0.000769753	0.000516075
92.4	0.00529141	0.00335127	-3.69906e-05	0.00043359
92.64	0.00483668	0.00312126	0.000558106	0.000414603
92.88	0.00543107	0.00444351	0.000317368	0.000277586
93.12	0.00458778	0.00366077	0.000343086	7.62463e-06
93.36	0.00469469	0.00349554	0.00035744	0.00039415
93.6	0.00510991	0.00369727	0.000288716	2.9885e-07
93.84	0.00495388	0.00344182	0.00114502	0.000373028
94.08	0.00482395	0.00319567	0.000648976	0.000254561
94.32	0.00542315	0.00376608	0.00017139	-0.000178807
94.56	0.0046616	0.00349405	0.000136144	0.000395598
94.8	0.00505309	0.00354383	0.000374907	0.000622055
95.04	0.00541813	0.00425988	0.000583622	0.000326773
95.28	0.00558011	0.00342132	0.000717752	0.000587889
95.52	0.00542598	0.00372931	0.000505551	3.96562e-05
95.76	0.00474428	0.00362548	0.00061079	0.000606997
96	0.00496331	0.00362644	6.84906e-05	1.2745e-06
96.24	0.00550532	0.00346118	0.000705142	0.000462933
96.48	0.00559694	0.00368035	0.000460936	0.000340504
96.72	0.00504459	0.00338061	0.000127941	0.000362682
96.96	0.00547141	0.00328361	0.00065079	0.000661775
97.2	0.00592195	0.00364014	0.000181654	0.000525637
97.44	0.00496571	0.00373131	0.000620462	0.000187222
97.68	0.00478985	0.00303949	-0.000119889	0.000536355
97.92	0.00509145	0.00346066	0.000398435	0.000286254
98.16	0.00534922	0.00364348	4.39396e-05	0.000477972
98.4	0.00555346	0.00319047	0.00115201	0.000443684
98.64	0.00492486	0.00350799	0.000777097	0.00039139
98.88	0.00519626	0.00333441	0.000179677	0.000406243
99.12	0.00460833	0.00342425	0.000373021	-6.16668e-05
99.36	0.00505085	0.00428299	0.000841471	0.000241561
99.6	0.00470475	0.00371376	0.00093872	0.000220001
99.84	0.00514493	0.00333958	0.0004305	0.000275832
100.08	0.00500529	0.00351598	0.000197713	0.00029478
100.32	0.00473719	0.00338791	0.000409737	-0.000304198
100.56	0.00512021	0.0038151	0.00016375	0.000248635
100.8	0.00494328	0.00423049	0.00119438	0.000715494
101.04	0.00488211	0.00365715	0.000729385	0.000549599
101.28	0.00514962	0.0032033	0.000815949	0.000254554
101.52	0.00556929	0.00413199	0.000481518	0.000595494
101.76	0.00495159	0.00387294	0.000781838	0.000417862
102	0.00557613	0.0040024	0.000586975	0.000129275
102.24	0.00500771	0.0035304	1.18559e-05	-0.000173711
102.48	0.00512746	0.00416978	0.000647655	-7.51697e-05
102.72	0.00486863	0.00367193	0.000591786	0.000126035
102.96	0.00492495	0.00371648	0.000353813	0.000103555
103.2	0.00504795	0.00347904	8.99577e-05	9.05551e-05
103.44	0.00495386	0.00337083	-0.000442172	0.000612104
103.68	0.00508364	0.00404436	0.000531118	0.000153209
103.92	0.0052366	0.00370535	0.000579121	0.000327005
104.16	0.00559405	0.0040907	0.000292619	0.000572286
104.4	0.00464444	0.00383465	0.000649595	-6.85821e-05
104.64	0.00549527	0.00388201	-5.10689e-05	-0.000175768
104.88	0.00532871	0.00349304	0.000310339	0.000303895
105.12	0.00466566	0.00328544	1.4344e-05	0.000324248
105.36	0.0048258	0.00376527	8.4683e-05	-0.000269873
105.6	0.00481535	0.00346406	0.000189248	0.000403835
105.84	0.00511187	0.0040259	0.000361682	7.71935e-05
106.08	0.00502791	0.00341518	0.00084682	0.000492194
106.32	0.00469763	0.00373541	0.000534335	-4.32089e-05
106.56	0.00585993	0.00341518	0.000924946	-4.02145e-05
106.8	0.00524678	0.00427093	0.000378961	0.000291869
107.04	0.00413161	0.00331344	0.000158562	0.00021441
107.28	0.00510871	0.00387891	0.000311889	0.000453761
107.52	0.00554403	0.00373027	0.000116209	0.000497266
107.76	0.00486704	0.0031727	0.000414127	0.000618292
108	0.00531904	0.00353595	0.000327867	-7.04365e-06
108.24	0.00507022	0.00371206	0.00139144	0.000529361
108.48	0.00538982	0.00341803	0.000523131	-0.00013031
108.72	0.0049589	0.0035125	0.00025736	-0.000158365
108.96	0.00499948	0.00378526	0.000747276	-6.88648e-05
109.2	0.00529893	0.00351549	0.000324583	-0.000152745
109.44	0.00520659	0.00406918	0.000516731	0.000652825
109.68	0.0052351	0.00339761	0.000473433	0.000396389
109.92	0.00563773	0.00374493	0.000412406	0.000486989
110.16	0.00538074	0.00356642	0.000755576	0.000529933
110.4	0.00518002	0.00352896	0.000383731	0.000372542
110.64	0.00459359	0.00308369	0.000112829	-1.03762e-05
110.88	0.00546107	0.00325942	0.000537568	0.000105863
111.12	0.00473001	0.003974	0.000906034	5.51266e-05
111.36	0.00479795	0.00406198	0.000366023	-1.24212e-05
111.6	0.00555982	0.00368991	0.000511924	-5.78523e-05
111.84	0.00498104	0.00368669	0.00129522	0.000573617
112.08	0.00552218	0.00374133	2.55056e-05	0.00012378
112.32	0.00558299	0.00379101	0.0016005	-0.000289519
112.56	0.00449075	0.00393121	0.0010757	0.000342143
112.8	0.00540103	0.00375294	0.000404414	-0.00064107
113.04	0.00547489	0.00386834	0.000572852	5.05634e-05
113.28	0.00492764	0.00372448	0.000309483	-8.88954e-05
113.52	0.0054834	0.00394388	0.000847744	0.000470308
113.76	0.00549057	0.00396954	0.000249989	0.000280069
114	0.00555931	0.00414415	0.000269346	0.000436134
114.24	0.00553762	0.00324426	0.000117161	-3.40847e-05
114.48	0.00504284	0.0038842	0.000290866	0.000106566
114.72	0.00476131	0.00362303	0.00122727	0.000190487
114.96	0.00516059	0.00335053	0.000682275	0.000563256
115.2	0.00512627	0.00355055	0.000208034	0.000281659
115.44	0.00490275	0.00358712	0.000598719	-3.44313e-05
115.68	0.00496575	0.00340755	-0.000215081	-1.66811e-05
115.92	0.00635104	0.00390188	0.000381853	-8.58688e-05
116.16	0.00497591	0.00338838	0.00050388	0.000304711
116.4	0.00500578	0.003497	0.000934629	0.000599426
116.64	0.00496473	0.00306182	4.37165e-06	0.000181573
116.88	0.00525002	0.00332431	8.4585e-05	-0.000162971
117.12	0.00538628	0.00321151	0.000705254	6.26611e-06
117.36	0.00503964	0.003489	0.000553711	0.000383868
117.6	0.00545571	0.00338007	0.00013396	6.23129e-06
117.84	0.00531994	0.00343493	0.000489394	-0.000195706
118.08	0.00536842	0.00352802	0.000621294	0.000303161
118.32	0.00510185	0.00366745	0.000536028	-0.000246437
118.56	0.00552789	0.00356257	0.00091487	-0.000198435
118.8	0.0052266	0.00329433	0.000606955	-0.00044502
119.04	0.00508004	0.00314553	0.000434562	0.000266813
119.28	0.00530816	0.00318896	0.000302773	0.00056146
119.52	0.00524746	0.00360623	0.000458864	7.86061e-05
119.76	0.00558172	0.00400649	9.71972e-05	6.53056e-06
120	0.00484285	0.00334527	0.00052963	-3.63592e-05
120.24	0.00499246	0.00371371	0.000984566	0.000147673
120.48	0.00497784	0.00328465	0.000581164	0.000362025
120.72	0.00510346	0.00369638	-0.000236381	-0.000400992
120.96	0.004974	0.00336734	0.000743361	4.24232e-05
121.2	0.00504427	0.00376399	0.000288269	-2.66856e-05
121.44	0.00564866	0.00412316	0.00112499	0.000316916
121.68	0.00552564	0.00356259	0.000682508	0.000389865
121.92	0.00525111	0.00353805	0.000877936	0.00025489
122.16	0.00516104	0.00351903	0.00091602	0.00021477
122.4	0.00576354	0.00333191	0.000929331	0.000267017
122.64	0.0055077	0.00357669	0.000276974	0.000396056
122.88	0.00536468	0.0037767	9.62243e-05	2.1003e-05
123.12	0.00532907	0.00330765	0.00088032	-7.56938e-05
123.36	0.00519063	0.00362766	0.000457082	0.00028311
123.6	0.00551764	0.00342084	0.000260681	0.000100018
123.84	0.0049874	0.0035	0.000631225	-0.000133657
124.08	0.00541858	0.00371052	-4.63541e-05	1.81949e-05
124.32	0.00590703	0.00373134	0.000993838	-7.86346e-06
124.56	0.00494631	0.00394438	0.00129455	0.000182517
124.8	0.00525733	0.00288254	0.000844209	0.000103457
125.04	0.00503258	0.00373452	0.000476478	-5.63481e-05
125.28	0.00529436	0.00355511	0.000945708	0.000283137
125.52	0.00554938	0.00330308	0.000284951	-5.73815e-05
125.76	0.00542417	0.00365425	0.00104814	0.000186791
126	0.00456887	0.00358908	0.00091182	-0.000213845
126.24	0.00497976	0.00366458	-0.000206832	5.18731e-05
126.48	0.00540133	0.00419568	-5.20803e-05	0.000261855
126.72	0.00543885	0.00331288	0.000505448	-6.00138e-05
126.96	0.00531942	0.00311114	0.000791559	-0.00023786
127.2	0.00546369	0.00374532	0.000791172	-0.000344456
127.44	0.00510599	0.00385184	-0.000260927	-8.12759e-05
127.68	0.00561639	0.00330298	0.000744426	8.92332e-05
127.92	0.00507213	0.0036393	-0.000101915	9.20649e-06
128.16	0.00507958	0.00349898	0.000528057	0.000383804
128.4	0.00553457	0.00354859	0.000397127	5.69974e-05
128.64	0.00586041	0.00377737	0.000263309	-0.000372993
128.88	0.00582	0.0037156	0.000481236	0.000446369
129.12	0.00494413	0.00322881	1.93182e-05	-0.00056978
129.36	0.00565555	0.00323242	0.000720498	-0.0003823
129.6	0.00502972	0.00322668	0.000272862	-0.000575006
129.84	0.00571276	0.00369316	0.000691182	0.000388375
130.08	0.00519482	0.00340811	0.000432586	9.43649e-05
130.32	0.00556107	0.00348144	0.000633142	0.000200404
130.56	0.00466782	0.00379881	3.17339e-05	-0.000281985
130.8	0.0049138	0.00352255	0.000486015	-3.1767e-05
131.04	0.00517424	0.00399262	0.000565284	-0.000304478
131.28	0.00504658	0.00397672	0.000827072	0.000134899
131.52	0.00542854	0.00416333	0.000455317	-0.000115812
131.76	0.00515437	0.00375857	0.000317824	0.000155552
132	0.00572707	0.00348845	0.000282641	-0.00033874
132.24	0.0054032	0.00394459	0.000342007	7.18703e-05
132.48	0.00520697	0.00308187	0.000199271	0.00033436
132.72	0.00550904	0.00366019	-0.000194896	-0.000385216
132.96	0.00535452	0.00391917	-1.25841e-05	-0.000263577
133.2	0.00504905	0.00368564	0.000190036	-0.00054376
133.44	0.00499128	0.00302635	-0.000127639	-1.67459e-05
133.68	0.00561265	0.00338093	0.0001371	-0.000314103
133.92	0.00531511	0.00361653	-9.42847e-05	0.000186836
134.16	0.00502763	0.00333085	-0.000518909	0.000241699
134.4	0.00571039	0.00360931	0.00093127	-9.04585e-05
134.64	0.00572664	0.00349697	0.000413134	-0.000334088
134.88	0.00541212	0.0036721	0.000613911	-0.000364091
135.12	0.00520514	0.00395587	0.000562069	0.000368329
135.36	0.00565552	0.00357537	0.0011423	-0.000107002
135.6	0.00550715	0.00365132	0.000487561	0.000659498
135.84	0.00445988	0.00355024	0.000322353	-0.000601292
136.08	0.00534415	0.00392526	0.000481125	3.4216e-05
136.32	0.00614251	0.00318065	0.000604228	6.14112e-05
136.56	0.00516012	0.00325918	0.000846832	0.000323385
136.8	0.00549478	0.00339206	-2.25036e-05	9.33926e-05
137.04	0.00468877	0.00345627	0.000370959	6.37299e-05
137.28	0.00514751	0.00344124	0.000811838	-9.67731e-06
137.52	0.00514709	0.00343967	0.000476242	6.13953e-05
137.76	0.00558525	0.00351506	-0.000310274	0.000164403
138	0.00573448	0.00333051	0.00049242	0.000110617
138.24	0.00564228	0.00364691	0.00011685	-0.000156716
138.48	0.0057308	0.00292047	0.000268833	-0.000283613
138.72	0.00554866	0.0030808	0.000729248	4.96068e-05
138.96	0.00490373	0.00356537	0.000128856	0.00035949
139.2	0.00571421	0.00301832	0.000558933	-0.000134808
139.44	0.00527095	0.00332305	0.000571918	-0.000271369
139.68	0.00574473	0.00360306	-9.10177e-05	-5.38803e-05
139.92	0.00508751	0.00336626	0.000691676	-0.000303653
140.16	0.0052311	0.00370393	4.60833e-05	-0.000205511
140.4	0.00566282	0.00343957	0.000430712	0.000331012
140.64	0.00487745	0.00381338	0.000289805	-0.000326548
140.88	0.00542127	0.00267019	0.000687172	0.000186133
141.12	0.00503539	0.00299914	0.000754134	-0.000131217
141.36	0.00590804	0.00330689	0.000409603	-0.000330469
141.6	0.0054685	0.00295664	0.000554073	-0.000260895
141.84	0.00557088	0.00371525	0.000386779	-0.000287082
142.08	0.00476552	0.00319699	0.0005411	0.000282103
142.32	0.00564647	0.00306774	0.000433957	-0.000530768
142.56	0.00474971	0.0033662	0.000237274	-8.81158e-05
142.8	0.00568585	0.00306083	0.000747508	-0.00021699
143.04	0.00592587	0.00383285	0.000149975	-3.93867e-05
143.28	0.0059298	0.00346779	-0.00043212	-0.000311408
143.52	0.00556178	0.00390786	0.000263334	0.000231823
143.76	0.00563696	0.00322842	0.00041454	-0.000305045
144	0.00553397	0.00383666	0.000219237	-0.000201134
144.24	0.00567661	0.00354174	6.69966e-05	0.000274888
144.48	0.00527727	0.00351659	0.000645109	-0.000228431
144.72	0.00491926	0.0033199	0.000144164	-0.000104103
144.96	0.00559498	0.00375005	0.000342938	-1.29891e-05
145.2	0.00494117	0.00329617	0.000921894	-0.000618011
145.44	0.00547066	0.00365153	0.000347765	-0.000266566
145.68	0.00498386	0.00344558	0.000580112	7.69057e-05
145.92	0.0057549	0.00337356	0.000738159	-0.00011085
146.16	0.00491757	0.0029514	0.000448418	0.000233593
146.4	0.0051296	0.00286866	0.000235456	0.000110624
146.64	0.0056007	0.00288214	0.000112303	-0.000157958
146.88	0.00495529	0.00323056	0.000412751	0.000132426
147.12	0.0052721	0.00332768	0.000978521	-0.000141759
147.36	0.00498135	0.00342796	0.000357353	-0.000132758
147.6	0.00538012	0.00361623	0.000492323	-0.000180608
147.84	0.0054561	0.00378865	0.000770909	-0.000172756
148.08	0.0052303	0.00359866	-8.3868e-05	-3.68487e-05
148.32	0.00515623	0.00364061	0.000107919	-0.000498105
148.56	0.00553218	0.0029501	0.000891146	6.71604e-05
148.8	0.00504769	0.00340926	-0.00043942	6.55874e-05
149.04	0.00563515	0.00337917	1.88283e-05	0.000247982
149.28	0.00504378	0.00337996	-6.3887e-05	0.000373456
149.52	0.00524728	0.00363156	2.44971e-05	-0.000395948
149.76	0.00523322	0.00338955	0.000287065	-5.37682e-05
150	0.00488574	0.00361898	0.000505343	-0.000225413
150.24	0.00575878	0.00343502	0.000720461	-0.000427179
150.48	0.00553278	0.00375581	0.00081508	1.61003e-05
150.72	0.00473237	0.00343301	0.00024637	-0.000318209
150.96	0.00554764	0.00335635	0.000761578	-0.000573418
151.2	0.00541311	0.00337471	0.000113073	-4.11434e-05
151.44	0.00534546	0.00368582	0.000154756	-0.000311344
151.68	0.00512943	0.00315728	0.000114412	-0.000341227
151.92	0.00548981	0.0031436	0.000314664	-0.000653493
152.16	0.00598921	0.0037148	0.000247554	-4.03816e-05
152.4	0.00606277	0.00368354	-0.000672305	-0.000127228
152.64	0.00561605	0.00359175	0.000547717	-0.000392415
152.88	0.00539934	0.00348887	0.00102568	0.000218376
153.12	0.00557293	0.00350955	0.000142279	0.000351479
153.36	0.00485291	0.0031049	0.000254434	-5.10101e-05
153.6	0.00572191	0.00341616	0.000604901	0.000308154
153.84	0.00532445	0.00352218	0.000252376	-0.000283904
154.08	0.00530705	0.00384829	-8.76738e-05	0.000285607
154.32	0.00478191	0.00375196	0.000650721	-0.000187709
154.56	0.00550933	0.00353173	-2.98078e-05	-0.000469135
154.8	0.00554527	0.00367518	0.000226464	-0.000496523
155.04	0.00499182	0.00327021	-0.000235868	-0.000352757
155.28	0.00484107	0.00300085	0.000368068	0.000420282
155.52	0.00515625	0.00350854	0.000106007	-0.000120919
155.76	0.00506498	0.00310653	-6.75595e-05	-0.000281371
156	0.00519391	0.00305262	0.000508595	-0.000331846
156.24	0.00515413	0.00388309	0.000225919	-0.000110374
156.48	0.00525358	0.00358792	-5.13163e-05	-0.000213202
156.72	0.0050053	0.00320727	0.000843567	-0.000111262
156.96	0.0059931	0.00337666	3.29931e-05	0.000295129
157.2	0.00572907	0.00330584	0.000462772	-0.00058431
157.44	0.00574724	0.00314526	-0.000209538	9.57089e-05
157.68	0.00560524	0.00347724	0.000154586	8.40542e-05
157.92	0.00548556	0.0031478	-6.03887e-05	-0.000315223
158.16	0.0051588	0.00300184	0.000506956	-0.00012137
158.4	0.00566718	0.00321458	8.72358e-05	-0.000174649
158.64	0.00491939	0.00349541	0.000475819	-0.00041669
158.88	0.00461455	0.00331659	0.000944638	-0.000195594
159.12	0.00533168	0.00335584	0.000433536	-0.000523169
159.36	0.00497694	0.00327923	0.000114622	-0.000393636
159.6	0.005677	0.00350653	0.000226055	-0.000217955
159.84	0.00481448	0.00360199	0.000385808	-0.000374805
160.08	0.00552513	0.00383686	0.000919181	-0.000340859
160.32	0.00522868	0.00318714	0.000740585	-0.000798158
160.56	0.00514876	0.00322694	-9.11501e-05	-0.000361448
160.8	0.00555564	0.00347415	-0.000117156	-0.000594008
161.04	0.00570443	0.00328815	-0.000496761	7.86836e-05
161.28	0.00577137	0.00291118	0.000591907	-0.0001173
161.52	0.00518423	0.0027954	0.000231904	-5.4317e-05
161.76	0.00518627	0.00366396	0.000583815	-0.000520788
162	0.00510539	0.00248189	0.000230742	-0.000303255
162.24	0.00541807	0.00237231	0.000356157	-4.78278e-05
162.48	0.00547989	0.00347062	-0.000263961	0.000559203
162.72	0.00432303	0.00339681	0.00118146	-0.000808915
162.96	0.00578046	0.0030656	0.00057724	0.000141215
163.2	0.00583708	0.00307236	0.000502015	-0.000535344
163.44	0.00537651	0.00272116	0.000769079	-0.000316248
163.68	0.00553026	0.00363774	0.000890886	0.00017234
163.92	0.00496636	0.00326215	0.000240005	-0.000245629
164.16	0.00531722	0.00318869	-7.74963e-05	-0.000501259
164.4	0.00617906	0.00355868	0.000761277	-0.000356412
164.64	0.00551246	0.00330054	-0.000277374	-0.000750182
164.88	0.0055489	0.003423	-0.000136721	-0.000508491
165.12	0.00473911	0.00316774	0.000108486	2.39781e-05
165.36	0.00515003	0.00318543	4.25366e-05	-0.000551306
165.6	0.00544003	0.00325846	9.94702e-05	-0.000194875
165.84	0.0055	0.00312667	0.000237912	-0.000166287
166.08	0.00511483	0.00306857	0.000362704	6.13331e-05
166.32	0.00474088	0.00290241	0.000921495	-0.000711808
166.56	0.00531028	0.00349842	0.000485643	-0.000271675
166.8	0.00538043	0.00303291	1.50657e-05	-0.000344836
167.04	0.00489879	0.0034204	2.50942e-05	-0.00023817
167.28	0.00473609	0.00344072	0.00100976	-0.000430763
167.52	0.00527406	0.00327761	0.000643239	0.000292695
167.76	0.00488815	0.00398796	-0.000631403	0.000120105
168	0.00475738	0.00273493	0.000250755	-0.000560345
168.24	0.0052815	0.00321059	0.000815783	-0.000491817
168.48	0.00569199	0.0032069	-0.000625455	-0.000662823
168.72	0.00563343	0.00349184	-0.000477821	-0.000171382
168.96	0.00489362	0.00312346	0.00130675	-0.000564826
169.2	0.00448838	0.00344882	0.000372526	-9.11221e-05
169.44	0.00506393	0.00302842	4.72829e-05	-0.000241665
169.68	0.00505912	0.00360388	0.000722217	-0.000389866
169.92	0.0052834	0.00320658	0.000733691	-0.00057527
170.16	0.00561217	0.00338335	0.000508561	-0.00039312
170.4	0.0053677	0.00292917	0.000357233	0.00022902
170.64	0.00531514	0.00366359	9.80896e-05	-0.000133966
170.88	0.00565837	0.00312253	0.000874427	-0.000296913
171.12	0.00528192	0.00258803	0.000360665	-0.000335394
171.36	0.00517991	0.00305266	0.000533215	-0.000153393
171.6	0.00476159	0.00332964	0.000677663	-0.000171699
171.84	0.00484136	0.00331508	-3.36894e-05	-0.000660528
172.08	0.00533181	0.00304839	0.000120812	-0.000563709
172.32	0.0048574	0.00311719	-0.000369314	-0.000453034
172.56	0.00553635	0.00294103	0.000715631	-0.000732298
172.8	0.00503065	0.00356279	0.000140643	-0.000782881
173.04	0.0053376	0.00294999	0.000924399	-0.000765942
173.28	0.00486639	0.00312069	0.000405068	-0.000169966
173.52	0.00539035	0.00365991	0.000192445	-0.000396065
173.76	0.00536374	0.00314733	-0.000113633	-0.00048334
174	0.00573646	0.00286591	-8.4795e-05	-0.000640379
174.24	0.00502603	0.00273746	-0.000309895	-0.000291081
174.48	0.00520083	0.00330323	0.000242499	9.8168e-05
174.72	0.00558756	0.00292848	-0.000399544	-0.000680201
174.96	0.00590344	0.00310387	-0.000123151	-0.000371715
175.2	0.00517029	0.0034563	0.000449317	-0.000572225
175.44	0.00587438	0.00340153	-0.000350555	-4.88297e-05
175.68	0.00524155	0.00323532	0.000207881	-0.000766986
175.92	0.00490859	0.00325929	6.08144e-05	-0.000147229
176.16	0.00587548	0.00282468	0.000380169	-0.000853556
176.4	0.00465605	0.00308617	0.000391707	1.18336e-05
176.64	0.0058614	0.00326836	0.000239749	-0.000371048
176.88	0.00477816	0.00339792	-0.000192164	-0.000433977
177.12	0.00586908	0.00352178	0.000582609	-0.00112712
177.36	0.00498472	0.00345171	0.00021087	-0.00017584
177.6	0.00591616	0.00322565	7.83343e-05	-6.6497e-05
177.84	0.00528425	0.00350501	-4.98826e-05	-0.000400568
178.08	0.0059012	0.00299579	-0.000165171	-0.000713081
178.32	0.00539401	0.00365019	-0.000435444	-0.000485039
178.56	0.00575836	0.0037731	-0.000240816	-0.000488676
178.8	0.0049447	0.00336065	-8.29449e-05	0.000192729
179.04	0.00532247	0.00276131	0.000228303	-0.00111689
179.28	0.0049084	0.00334756	0.000416299	-0.000344115
179.52	0.00559851	0.0030457	0.000133369	-0.000177984
179.76	0.00593423	0.00311322	-0.000245906	-0.000903026
180	0.00554933	0.00333067	0.000147696	-0.000490693
180.24	0.00535371	0.00356954	0.000746481	-0.000515063
180.48	0.00573231	0.00308126	0.000462373	-0.000430071
180.72	0.00555665	0.00275245	-7.24407e-06	-0.000615685
180.96	0.00566329	0.00325774	0.000775546	-0.000184207
181.2	0.00487083	0.0029578	-0.000585412	0.000121328
181.44	0.00588209	0.00318871	-6.22422e-06	-0.000270847
181.68	0.00565762	0.00315266	0.000389675	-0.000506262
181.92	0.00542401	0.00265397	0.000464057	-0.00054207
182.16	0.00478288	0.00324628	6.80564e-05	-0.000751032
182.4	0.00561957	0.00351367	1.3163e-05	-0.000926841
182.64	0.00552406	0.00356964	0.00166548	-7.54457e-05
182.88	0.00543017	0.00315208	-0.000207992	-0.000279793
183.12	0.00567339	0.00310629	0.000191984	-0.000412393
183.36	0.00523591	0.00289005	-0.000193054	-0.000910904
183.6	0.00532444	0.00348163	3.80272e-05	-0.000445616
183.84	0.00514373	0.00309367	0.000510166	-0.000750436
184.08	0.00498334	0.00348616	-0.000147725	-0.00101761
184.32	0.00554825	0.00301554	-0.000206523	-7.97434e-05
184.56	0.0054726	0.00334002	6.60918e-05	-0.000618126
184.8	0.00539816	0.00299924	0.000207988	-0.000291536
185.04	0.00611353	0.00337228	-7.7234e-05	1.77274e-05
185.28	0.00562373	0.00335995	0.000346497	-0.000708623
185.52	0.00544551	0.00209664	-0.000338275	0.000120846
185.76	0.00575796	0.00370472	0.000293799	-0.000367878
186	0.00536095	0.00301328	0.000255708	-0.000651532
186.24	0.00548793	0.0030624	0.00042918	-0.000648783
186.48	0.00551477	0.00332383	-0.000330899	-0.000310132
186.72	0.00545018	0.0027805	-0.000150377	-0.000871828
186.96	0.0051204	0.00334246	0.000229198	-0.000716826
187.2	0.00563258	0.00372535	0.000162781	-0.000561274
187.44	0.00568137	0.00328094	-0.00030832	-0.000508638
187.68	0.00545153	0.00298453	-0.000328654	-4.85833e-05
187.92	0.00556624	0.0033067	0.000341503	-0.000486939
188.16	0.00568282	0.00270246	-0.000237495	-0.000319629
188.4	0.00519078	0.00285362	7.02829e-05	2.40165e-05
188.64	0.00558175	0.00315836	-0.00028525	-0.000622519
188.88	0.00535362	0.00287292	-0.000238936	-0.0005742
189.12	0.00579498	0.00243523	-0.000465734	-0.00126689
189.36	0.00540074	0.00269194	-2.57074e-05	-0.00055145
189.6	0.00553321	0.0034551	-0.000417844	-0.000192513
189.84	0.00445093	0.0029575	-2.77429e-05	-0.00108912
190.08	0.00525312	0.0030527	0.000544878	-0.00077426
190.32	0.0053863	0.0028961	0.000237111	-0.00040305
190.56	0.00567626	0.0029245	0.000758596	-0.000654163
190.8	0.00563219	0.00288651	0.000642532	-0.000211416
191.04	0.00514417	0.00334548	-4.11871e-05	-0.000403473
191.28	0.0052343	0.00296193	0.000231683	-0.000589664
191.52	0.00516941	0.00322272	-0.000330267	-0.000523068
191.76	0.00529726	0.00263038	0.000654228	-0.000326895
192	0.00514259	0.00358212	3.61992e-05	-0.000410887
192.24	0.00453246	0.00322476	0.000120338	-0.000832319
192.48	0.00489042	0.00328817	4.50149e-05	-0.000713759
192.72	0.00502972	0.00311095	0.000115857	-0.000350351
192.96	0.00594594	0.00275996	0.000569931	-0.000625477
193.2	0.0058226	0.00320061	-0.000214057	-0.000690702
193.44	0.00498995	0.00358197	5.13882e-05	-0.000672444
193.68	0.00554722	0.00283112	-1.07502e-05	-3.85125e-05
193.92	0.0061563	0.00340048	0.000404013	-0.000307115
194.16	0.00479003	0.00308121	-0.00107309	-0.000854874
194.4	0.00511427	0.00287335	0.00046032	-0.000407561
194.64	0.00568286	0.00313842	-0.000178144	-0.000295281
194.88	0.0056679	0.0038613	0.00039227	-0.00117417
195.12	0.00517555	0.00308188	0.00022507	-0.000644051
195.36	0.00542944	0.00348206	-3.59137e-05	-0.000487719
195.6	0.00510337	0.00303938	-0.000431448	-0.000509795
195.84	0.00507602	0.00315802	-0.000268236	-0.000717878
196.08	0.00460917	0.00275116	0.000246245	-0.000626994
196.32	0.00469923	0.00294343	0.000669632	-0.00102254
196.56	0.00520209	0.00279216	-0.000276288	-0.000747565
196.8	0.00526897	0.00326708	-0.00055973	-0.000421321
197.04	0.00582856	0.00331682	0.000455326	-0.000391098
197.28	0.00522102	0.0037621	-0.000173856	-0.00023437
197.52	0.00523611	0.0032151	-0.00023747	-0.00100447
197.76	0.00497991	0.00308192	-0.000329987	-0.00066672
198	0.00531855	0.00351217	-0.000932863	-0.000614383
198.24	0.00423758	0.00296705	0.000267361	-0.000552015
198.48	0.00479481	0.00263997	-0.000116654	-0.000379034
198.72	0.0048171	0.002593	-0.000365465	-0.00058204
198.96	0.00521913	0.00271311	0.000417035	-0.00104552
199.2	0.00485198	0.00319217	0.000122892	-0.000199456
199.44	0.00547042	0.0028898	0.000367291	-0.000796424
199.68	0.00520706	0.00301787	-3.76982e-05	-0.000588134
199.92	0.00538951	0.00314417	-0.000126591	-0.000833981
200.16	0.00508181	0.00326877	0.000498493	-0.000653866
200.4	0.00481287	0.00317743	-0.000120866	-0.000918671
200.64	0.0049805	0.00310999	-0.000355152	-0.000948336
200.88	0.00530911	0.00279083	-0.000120282	-0.000917105
201.12	0.00528598	0.0034288	-5.93124e-05	-0.00116183
201.36	0.0044301	0.00293197	3.43572e-05	-0.000762917
201.6	0.00519711	0.00308329	0.000914584	-0.000931219
201.84	0.00602486	0.00256527	-0.000542032	-0.000788557
202.08	0.00474362	0.0032196	0.00064817	-0.000513504
202.32	0.00538521	0.00268713	9.87529e-06	-0.000665986
202.56	0.00514297	0.00383283	-3.37219e-05	-0.00056842
202.8	0.00502178	0.00247352	-0.000351469	-0.000671935
203.04	0.00511639	0.0025069	0.000681798	-0.000990087
203.28	0.00544038	0.00303303	-0.000173365	-0.000576588
203.52	0.00575582	0.00313881	0.000320578	-0.000526007
203.76	0.00584231	0.00309756	0.00109286	-0.000627147
204	0.00510855	0.00356599	6.88376e-05	-0.000537323
204.24	0.00487499	0.00296635	-0.000243672	-0.00112527
204.48	0.00518689	0.0033147	-0.00064767	-0.000684096
204.72	0.00514325	0.00253466	-0.00030937	-0.000982661
204.96	0.00530609	0.00254872	-0.000450176	-0.000597557
205.2	0.00536367	0.00248138	-0.000187771	-0.000385037
205.44	0.00533033	0.0026843	0.000438394	-0.000602808
205.68	0.00557366	0.00298274	-0.000233358	-0.00104823
205.92	0.00537851	0.00279778	4.87093e-05	-0.00110986
206.16	0.0046344	0.00294348	-0.00041993	-0.000991512
206.4	0.00520268	0.00282586	-0.000121506	-0.000338224
206.64	0.00545773	0.00311664	0.000186186	-0.000870345
206.88	0.00564142	0.00272749	-0.00145099	-0.000749566
207.12	0.00513544	0.00296139	-0.000688723	-0.000594488
207.36	0.00523983	0.00262001	0.000291126	-0.000785309
207.6	0.00478935	0.00292702	0.000136072	-0.000222437
207.84	0.00516214	0.00263869	-0.000318375	-0.000467245
208.08	0.00467233	0.0027803	0.000146593	-0.000713077
208.32	0.00519482	0.00367224	0.000166545	-0.00122319
208.56	0.00568865	0.00264437	-0.000281182	-0.000968751
208.8	0.0055808	0.00285331	-0.000200565	-0.000437054
209.04	0.00492055	0.00272019	-6.72022e-05	-0.000898229
209.28	0.00457416	0.00289805	-0.000100696	-0.00035557
209.52	0.0047609	0.00359737	-0.000232963	-0.000303894
209.76	0.00522724	0.00312973	-0.000323542	-0.000839658
210	0.00467278	0.00256585	-0.000643868	-0.000698606
210.24	0.00563279	0.00309906	-0.000361217	-0.000436852
210.48	0.00511447	0.00308292	-9.46429e-05	-0.000334523
210.72	0.00590675	0.00302054	-8.13459e-05	-0.0010657
210.96	0.00457487	0.00248064	0.000201401	-0.000495166
211.2	0.00582232	0.00296076	-0.000808007	-0.000422758
211.44	0.00501206	0.00242529	-9.3761e-05	-0.00104425
211.68	0.00515971	0.00281815	-0.000518741	-0.0013843
211.92	0.00586597	0.00317678	-6.11164e-05	-0.00109618
212.16	0.004972	0.00248051	-0.000525865	-0.0012647
212.4	0.00587997	0.00259576	-0.000293444	-0.000891065
212.64	0.00485107	0.00304549	-3.75757e-05	-0.000975332
212.88	0.0053654	0.00284204	-9.8856e-05	-0.000484293
213.12	0.00498124	0.00338795	-0.000236254	-0.00145467
213.36	0.00493395	0.0031489	-0.000189678	-0.000907626
213.6	0.00524698	0.00312052	0.000211094	-0.000722363
213.84	0.00532904	0.0026982	-0.00042979	-0.000704621
214.08	0.00461595	0.00283516	-0.000715974	-0.000971333
214.32	0.00456773	0.00278104	-0.000206666	-7.67934e-05
214.56	0.00465654	0.00329526	-0.000688321	-0.000943878
214.8	0.00487789	0.00271205	0.000538533	-0.00135226
215.04	0.00476264	0.00240364	-0.000314151	-0.000368574
215.28	0.00556058	0.00311372	-0.000300193	-0.000789203
215.52	0.00501426	0.00241971	-0.000198626	-0.0012128
215.76	0.00495369	0.00297499	-1.66079e-05	-0.000680658
216	0.00491955	0.00248015	-0.00036896	-0.000808192
216.24	0.00550231	0.00297588	-7.67874e-05	-0.00121641
216.48	0.00540965	0.00274021	-0.000596992	-0.000976414
216.72	0.00498997	0.00251724	-0.000532995	-0.000545624
216.96	0.00512975	0.00288467	-0.000155533	-0.000912217
217.2	0.00503385	0.00277329	-0.000106715	-0.000853103
217.44	0.00480994	0.00300953	-0.000690651	-0.000873021
217.68	0.00585534	0.00255813	-0.000842288	-0.0010263
217.92	0.00528659	0.00326823	-0.000217005	-0.00102362
218.16	0.00540386	0.00306895	-5.94563e-05	-0.00101791
218.4	0.00451846	0.00253191	0.000209059	-0.000803967
218.64	0.0059789	0.00309012	-0.000818463	-0.0010404
218.88	0.00497428	0.00310057	0.000133395	-0.000753158
219.12	0.00533453	0.00291042	-0.000862148	-0.000523558
219.36	0.0053785	0.00308766	-0.00025622	-0.000406844
219.6	0.00472662	0.0025287	-0.000295794	-0.00110975
219.84	0.00615467	0.00285849	-0.00018989	-0.000988784
220.08	0.00495817	0.00305325	0.000436214	-0.00105649
220.32	0.00492343	0.00325397	-0.000451524	-0.00115218
220.56	0.005943	0.00292141	0.00011613	-0.000655667
220.8	0.00572546	0.00251306	-0.000106414	-0.00068575
221.04	0.0056249	0.00258124	-0.000292466	-0.000727835
221.28	0.00496068	0.0034942	-0.000733127	-0.000995713
221.52	0.00545573	0.00270765	-0.000447681	-0.000357117
221.76	0.00482332	0.00311566	0.000226504	-0.000783779
222	0.00480934	0.00247723	0.000273627	-0.000776194
222.24	0.0048276	0.00262498	-0.000245849	-0.000507011
222.48	0.00471706	0.00329171	-0.000228795	-0.000682276
222.72	0.0052145	0.00264504	-7.85086e-05	-0.00102346
222.96	0.00502834	0.00300695	-0.000542307	-0.000788644
223.2	0.00475035	0.00328326	-0.000542821	-0.000958689
223.44	0.0051962	0.00297726	-0.000121004	-0.00100684
223.68	0.00573649	0.00249358	-1.62743e-07	-0.000716738
223.92	0.00521335	0.00275595	1.01098e-05	-0.000648015
224.16	0.00536788	0.00270728	-0.000487633	-0.000787101
224.4	0.00500515	0.00286877	-0.000440521	-0.00100934
224.64	0.00415883	0.0028681	-0.000298048	-0.00119859
224.88	0.00563586	0.00311376	0.000241106	-0.000627516
225.12	0.00601352	0.002615	0.000306806	-0.00082339
225.36	0.00544289	0.00299549	0.000636014	-0.000552027
225.6	0.00560155	0.00236104	-0.00069709	-0.000712132
225.84	0.00528052	0.00244168	-0.000193571	-0.000913375
226.08	0.00530076	0.00307857	-0.000418928	-0.000731703
226.32	0.00534277	0.00235512	0.000421046	-0.000633643
226.56	0.00478562	0.00236155	-0.000140448	-0.000845785
226.8	0.00463383	0.00269338	7.36268e-05	-0.00060133
227.04	0.00498229	0.00255761	-0.000278193	-0.000752592
227.28	0.00477098	0.00293065	0.000264592	-0.000908994
227.52	0.00560903	0.00272697	0.000431119	-0.0013356
227.76	0.00513245	0.00320681	0.00034174	-0.00115857
228	0.00519843	0.00265235	0.000177079	-0.000748678
228.24	0.00590885	0.00218664	-0.000733145	-0.000805149
228.48	0.00532338	0.00283896	-0.000769955	-0.000935334
228.72	0.00563725	0.00297326	-0.000429088	-0.000749364
228.96	0.00497462	0.00300831	-0.000757061	-0.00116019
229.2	0.00555818	0.00292376	0.000130978	-0.00122983
229.44	0.00480999	0.00263193	7.0336e-05	-0.00159377
229.68	0.00522507	0.00252015	-0.000700438	-0.000618229
229.92	0.00631479	0.00325527	-0.000283795	-0.000906478
230.16	0.00538623	0.00208249	-0.000356134	-0.000472422
230.4	0.00443409	0.00290277	0.000565637	-0.000475329
230.64	0.0051315	0.00257981	-3.8796e-05	-0.000746822
230.88	0.00491794	0.00197433	-0.00068319	-0.000703422
231.12	0.00437783	0.0025345	-0.000518697	-0.00109558
231.36	0.00522467	0.00271885	-0.00101249	-0.000523583
231.6	0.00553771	0.00272498	0.000230906	-0.000823361
231.84	0.00548689	0.00313424	-0.000355522	-0.00146026
232.08	0.00485454	0.00293141	-0.000205333	-0.00121011
232.32	0.00529786	0.00243972	-0.000168849	-0.00068624
232.56	0.0049773	0.0024263	-0.000924069	-0.00102563
232.8	0.00580995	0.00247391	-0.000293838	-0.00103481
233.04	0.00536912	0.00193718	0.000294049	-0.00110027
233.28	0.00497214	0.0025502	-0.000872816	-0.001021
233.52	0.00519404	0.00293467	-0.000673194	-0.000689949
233.76	0.00537639	0.00283428	-0.000436166	-0.000525647
234	0.00545201	0.00242485	-9.32824e-05	-0.000828932
234.24	0.00494008	0.00266259	-0.000991612	-0.00131252
234.48	0.00526681	0.00299132	0.000305994	-0.000996403
234.72	0.00464493	0.0025047	-0.000124388	-0.00126743
234.96	0.00475866	0.00286814	-0.000508757	-0.000777516
235.2	0.00505962	0.0030973	-0.000371482	-0.000816736
235.44	0.00440348	0.00262186	-0.000943531	-0.00105805
235.68	0.00540288	0.0026326	1.38758e-05	-0.000637565
235.92	0.00488685	0.00250803	-0.000501572	-0.000697661
236.16	0.00506598	0.0027814	-0.00048297	-0.00119025
236.4	0.00526259	0.00267327	-0.000405892	-0.000698357
236.64	0.00528751	0.00280686	-0.000421285	-0.000790729
236.88	0.00502779	0.00250098	-7.37332e-05	-0.000507836
237.12	0.00549258	0.00291173	-2.17972e-05	-0.00112348
237.36	0.00510633	0.00276584	-0.000628195	-0.00125515
237.6	0.00524494	0.00234994	0.000211199	-0.00118837
237.84	0.00452854	0.00235592	-3.31599e-05	-0.000683922
238.08	0.00519503	0.00205879	-0.000529438	-0.00103616
238.32	0.00467852	0.00250675	0.000545636	-0.000969415
238.56	0.00501622	0.00251565	-0.000205237	-0.00120876
238.8	0.00459017	0.00298218	-0.000607299	-0.00158959
239.04	0.00511436	0.00224744	-0.00012106	-0.000776553
239.28	0.00545003	0.00226296	-0.00078542	-0.0012465
239.52	0.00547802	0.00252553	-0.00033207	-0.00106568
239.76	0.00537978	0.00270826	-0.000855535	-0.00145211

## Sheet: Control
Time	Exp1	Exp2
0	0.000272	0.000317
0.24	-0.00021	-1.7e-05
0.48	5.01e-05	-8.4e-05
0.72	-0.00014	0.000103
0.96	6.88e-05	-5.1e-05
1.2	0.000486	8.86e-05
1.44	-5.8e-05	0.000153
1.68	7.19e-05	6.15e-05
1.92	0.000152	0.000236
2.16	0.000519	0.000125
2.4	0.000204	0.000205
2.64	0.000232	0.000106
2.88	0.000135	-2e-05
3.12	-3.6e-05	0.000148
3.36	4.53e-05	-2.3e-06
3.6	0.000133	6.5e-05
3.84	4.57e-05	7.55e-05
4.08	6.63e-05	-7.5e-05
4.32	-0.00021	7.71e-05
4.56	3.69e-05	0.00019
4.8	0.000187	0.000133
5.04	3.43e-05	0.000428
5.28	-5e-05	0.000184
5.52	0.000408	-0.00032
5.76	0.000324	0.000411
6	-5.4e-05	-5.6e-05
6.24	6.25e-07	2.4e-05
6.48	0.000232	-9.2e-05
6.72	4.63e-07	0.000213
6.96	0.000223	0.000328
7.2	6.7e-05	0.000185
7.44	0.000388	0.000363
7.68	0.000247	0.00042
7.92	0.000188	-0.00017
8.16	0.000436	0.000241
8.4	9.5e-05	2.4e-05
8.64	-8e-05	0.000225
8.88	9.72e-05	5.9e-05
9.12	0.000135	-0.00015
9.36	2.22e-05	4.55e-05
9.6	0.000189	-2e-06
9.84	8.08e-06	0.000205
10.08	-0.00039	8.18e-05
10.32	0.000303	-0.00011
10.56	-9.3e-05	1.1e-05
10.8	0.000132	-0.00037
11.04	0.000259	-0.00041
11.28	-9.9e-05	-2.5e-05
11.52	-0.00035	-0.00011
11.76	0.000149	-0.0001
12	-0.00019	0.000197
12.24	0.000128	3.04e-06
12.48	-0.00012	0.000203
12.72	-1.4e-05	-0.00025
12.96	-0.0004	-0.00018
13.2	-6.1e-05	0.000383
13.44	2.07e-05	9.8e-05
13.68	0.000355	0.000107
13.92	0.000282	-0.00024
14.16	0.000182	0.000146
14.4	-0.00043	-9.6e-05
14.64	7.37e-05	0.000295
14.88	-4.2e-05	0.000314
15.12	-0.00027	2.17e-05
15.36	0.00014	-0.0003
15.6	-0.00015	-0.00036
15.84	-0.00048	0.000249
16.08	-0.0003	0.000112
16.32	7.54e-05	-0.00048
16.56	0.000261	-0.00026
16.8	0.00037	0.000143
17.04	-0.00036	0.000211
17.28	-0.00043	0.000117
17.52	0.000547	6.28e-05
17.76	-8.5e-06	0.00016
18	-0.00012	6.31e-05
18.24	-6.6e-07	-0.00021
18.48	0.000274	1.98e-05
18.72	-0.00032	-2.3e-05
18.96	-1.7e-05	7.41e-05
19.2	-7.3e-05	-0.00022
19.44	0.000162	-0.00032
19.68	-8.7e-06	0.000306
19.92	-0.00028	-0.00035
20.16	0.000362	-0.00037
20.4	-0.00013	-0.00022
20.64	-0.00032	-0.00031
20.88	-0.0005	-0.00014
21.12	-0.0003	0.000159
21.36	0.000174	-0.00028
21.6	-7.6e-05	-8.7e-05
21.84	0.000288	0.000118
22.08	-0.00019	-0.00024
22.32	-7.7e-05	8e-06
22.56	-0.00016	-0.00029
22.8	-1.5e-05	-0.00013
23.04	-0.00017	8.28e-05
23.28	-0.00026	-5.1e-07
23.52	0.000271	-0.00014
23.76	3.1e-05	0.000133
24	0.000409	-3.8e-05
24.24	-0.00037	-0.00032
24.48	4.96e-05	0.000143
24.72	-0.00047	0.000258
24.96	-0.00037	-2.4e-05
25.2	-0.00019	-0.00014
25.44	-0.00035	-0.00011
25.68	0.000268	7.81e-05
25.92	0.000308	0.000161
26.16	0.000112	-0.00019
26.4	-0.00023	-0.00016
26.64	-1.7e-05	3.57e-05
26.88	0.000313	0.000386
27.12	-0.00043	9.85e-06
27.36	-0.00027	-7.9e-05
27.6	-0.00048	-0.00018
27.84	-5.3e-05	-0.00025
28.08	-0.00045	-4.1e-05
28.32	-4.1e-05	0.000158
28.56	-0.00015	-6.7e-05
28.8	-0.00013	-0.0002
29.04	-5.6e-05	-5.9e-05
29.28	-0.0004	-0.00051
29.52	0.000196	-0.00018
29.76	0.000206	-0.00034
30	-4.2e-05	-6.8e-05
30.24	-0.00024	9.56e-05
30.48	-4.2e-06	-0.00017
30.72	-0.01021	-0.01076
30.96	0.073434	0.063877
31.2	-0.05838	-0.06167
31.44	0.137264	0.143901
31.68	0.016028	0.015877
31.92	-1.7e-05	-0.00023
32.16	5.03e-05	-0.00013
32.4	-9.3e-05	7.7e-05
32.64	-0.00023	4.63e-05
32.88	-2.3e-05	-0.00016
33.12	-5.1e-05	-0.00013
33.36	9.65e-05	-0.00015
33.6	-1.9e-05	-0.0001
33.84	-0.00036	-0.00035
34.08	9.19e-05	-3.8e-05
34.32	-0.00012	5.22e-05
34.56	0.00016	-0.00029
34.8	2.36e-05	-0.00041
35.04	0.000484	5.33e-06
35.28	4.58e-05	-0.00026
35.52	2.67e-05	9.53e-05
35.76	9.94e-05	-0.00055
36	0.000326	-0.00031
36.24	2.43e-05	-0.00014
36.48	-9.5e-05	-2.8e-05
36.72	0.000196	-0.00043
36.96	-0.00015	-0.00013
37.2	-0.00024	-0.00069
37.44	0.000318	-1.6e-06
37.68	-0.00071	-0.00022
37.92	0.000342	9.02e-05
38.16	1.14e-05	-0.00033
38.4	0.000263	-0.00039
38.64	5.7e-05	-0.00044
38.88	-3.9e-05	-0.00038
39.12	-0.00054	-0.00011
39.36	-1.9e-05	-0.00022
39.6	-0.00016	-0.00023
39.84	-0.00041	-0.00016
40.08	-0.00015	-0.00037
40.32	3.81e-06	-0.00031
40.56	6.18e-05	-0.0003
40.8	-4.8e-05	-0.00013
41.04	6.6e-05	-0.00047
41.28	5.17e-05	-0.00023
41.52	0.000164	-0.00059
41.76	0.000216	-0.00038
42	-0.00015	-0.00014
42.24	-0.00011	-0.00045
42.48	-9.7e-05	-0.00012
42.72	-0.00032	-0.00022
42.96	6.22e-05	-9.7e-05
43.2	-0.00034	-0.00031
43.44	-0.00056	-0.00015
43.68	-8.6e-07	-0.00019
43.92	-0.00022	-0.00017
44.16	0.000119	-5.5e-05
44.4	8.13e-05	-0.00026
44.64	6.09e-05	-0.00043
44.88	-5.5e-05	-0.00022
45.12	-6.4e-05	-0.00043
45.36	-8.8e-05	-0.00039
45.6	-2.2e-05	6.24e-05
45.84	-0.00011	-0.00055
46.08	-2.7e-05	-0.00036
46.32	-0.00014	-0.0005
46.56	2.71e-05	-0.00023
46.8	-0.00017	-0.00012
47.04	9.17e-05	-6.8e-05
47.28	-0.00052	-0.00032
47.52	4.45e-05	-0.00052
47.76	0.0001	-0.00049
48	-6.8e-05	-0.00033
48.24	-0.00049	-0.00053
48.48	-0.00015	-0.00034
48.72	-0.00027	-0.00023
48.96	-0.00018	-9.4e-05
49.2	2.8e-05	-0.00024
49.44	-0.00035	-0.00036
49.68	-0.00053	-0.00032
49.92	-8.6e-05	-0.00022
50.16	7.35e-06	-0.0004
50.4	-0.00034	-0.00045
50.64	-0.00063	-0.00038
50.88	-0.00047	-0.00018
51.12	-0.00042	-0.00024
51.36	-7.3e-05	-0.00019
51.6	-2.8e-05	-0.00023
51.84	0.000126	-0.00027
52.08	0.000147	-0.00049
52.32	0.000118	-0.00014
52.56	0.000203	-8.2e-05
52.8	-0.00011	-0.00029
53.04	-0.00065	-0.00067
53.28	-0.00015	-8.2e-05
53.52	-0.00076	-0.00035
53.76	2.45e-05	-0.0002
54	-0.0005	-0.00055
54.24	-0.0004	-0.00041
54.48	-0.00011	-0.00052
54.72	-0.0004	-0.00015
54.96	9.32e-05	-0.00014
55.2	-0.00012	-0.00023
55.44	-7.8e-05	-0.0004
55.68	-0.00038	-0.00042
55.92	-0.00018	7.88e-05
56.16	-6.7e-05	-0.00016
56.4	-0.00018	-0.00027
56.64	-0.00044	-0.00023
56.88	8.35e-06	-0.00022
57.12	0.000111	-0.00038
57.36	0.000102	-0.00022
57.6	-3.5e-05	-0.00024
57.84	-0.00034	-0.00048
58.08	-0.00021	-0.00046
58.32	-0.00073	-0.0002
58.56	-0.00047	-0.00036
58.8	-0.00037	-0.00056
59.04	0.000171	-0.0002
59.28	-0.00068	-0.00022
59.52	-2e-05	-0.00041
59.76	-0.00021	-0.00042
60	-0.00032	-0.00054
60.24	-0.00039	-0.00048
60.48	-0.00045	-0.0008
60.72	-0.00034	-0.00069
60.96	-0.0004	-0.00076
61.2	-0.00052	-0.00053
61.44	-0.0002	-0.00042
61.68	-0.00051	-0.00036
61.92	-0.00059	-0.00021
62.16	4.45e-05	-0.00032
62.4	-0.00047	-0.00073
62.64	-3.8e-05	-0.00044
62.88	-0.00039	-0.00053
63.12	-0.00012	-9.1e-05
63.36	-0.00081	-0.00059
63.6	-0.00022	-0.00052
63.84	-0.00049	-0.00059
64.08	-0.00034	-0.00076
64.32	-0.00038	-0.00063
64.56	-0.00038	-0.00023
64.8	-0.00021	-0.00015
65.04	-0.00048	-0.0008
65.28	-0.00032	-0.00029
65.52	-0.00039	-0.00079
65.76	-0.00065	-0.00012
66	-0.00066	-0.00069
66.24	-0.00025	-0.00018
66.48	4.25e-06	-0.0002
66.72	-0.00046	-0.00043
66.96	-0.00017	-0.00053
67.2	-0.00058	-0.00025
67.44	-0.00048	-0.00053
67.68	-0.00044	-0.0007
67.92	-0.00025	-0.00043
68.16	-7.5e-05	-0.00033
68.4	-0.00037	-0.00031
68.64	-0.00053	-0.00063
68.88	-0.00035	-0.00064
69.12	-0.00038	-0.00086
69.36	-0.00034	-0.00063
69.6	-0.00051	-0.00046
69.84	-0.00018	-0.00026
70.08	-0.00076	-0.00075
70.32	-0.00077	-0.00069
70.56	-0.00063	-0.00067
70.8	-0.0001	-0.00063
71.04	-0.00012	-0.00031
71.28	-0.00049	-0.00032
71.52	-0.00049	-0.00063
71.76	-0.00047	-0.00044
72	-0.00035	-0.0005
72.24	-0.00057	-0.00026
72.48	-0.00101	-0.00081
72.72	-0.00076	-0.00084
72.96	-0.00076	-0.00059
73.2	-0.00058	-0.00043
73.44	-0.00077	-0.00031
73.68	-0.00061	-0.00038
73.92	-0.00054	-0.00029
74.16	-0.00064	-0.00031
74.4	-0.00021	-0.00034
74.64	-0.00043	-0.00046
74.88	-0.00048	-0.00014
75.12	-0.00052	-0.00032
75.36	-0.00053	-0.00075
75.6	-0.00014	-0.00031
75.84	-0.00095	-0.0002
76.08	-0.00057	-0.00049
76.32	-0.00059	-0.00095
76.56	-0.00038	-0.00076
76.8	-0.00109	-0.00044
77.04	-0.00058	-0.00028
77.28	-0.00051	-0.00055
77.52	-0.00074	-0.00061
77.76	-0.00014	-0.00059
78	-0.00027	-0.00066
78.24	-0.00032	-0.00044
78.48	-0.00044	-0.00038
78.72	-0.00038	-0.00016
78.96	-8.9e-05	-0.00075
79.2	-0.00042	-0.00059
79.44	-0.00044	-0.0006
79.68	-0.00027	-0.00097
79.92	-0.00072	-0.0008
80.16	-0.00024	-0.0007
80.4	-0.00038	-0.00055
80.64	-0.00023	-0.00049
80.88	-0.00033	-0.00049
81.12	-0.00026	-0.00064
81.36	-0.00053	-0.00071
81.6	-0.00029	-0.00033
81.84	-0.00056	-0.00042
82.08	-0.00058	-0.00067
82.32	-0.00015	-0.00081
82.56	-0.00076	-0.00071
82.8	-0.00053	-0.0006
83.04	-0.00041	-0.00034
83.28	-0.00092	-0.00065
83.52	-0.00043	-0.00037
83.76	-0.00033	-0.00016
84	-0.00071	-0.00059
84.24	-0.001	-0.00091
84.48	-0.00072	-0.00035
84.72	-0.00015	-0.00099
84.96	-0.00063	-0.0005
85.2	-0.00026	-0.0007
85.44	-0.00038	-0.00059
85.68	-0.00062	-0.00069
85.92	-0.00067	-0.00073
86.16	-0.00071	-0.00044
86.4	-0.00123	-0.00068
86.64	-0.00018	-0.00054
86.88	-0.00043	-0.00059
87.12	-0.00036	-0.0007
87.36	-0.00059	-0.00034
87.6	-0.00032	-0.00102
87.84	-0.00057	-0.00079
88.08	-0.00097	-0.00054
88.32	-0.00064	-0.00095
88.56	-0.00047	-0.00064
88.8	-0.00088	-0.00059
89.04	-0.00084	-0.00035
89.28	-0.00065	-0.00045
89.52	-0.00079	-0.00076
89.76	-0.00098	-0.00052
90	-0.00097	-0.00086
90.24	-0.001	-0.00067
90.48	-0.00021	-0.00088
90.72	-0.0002	-0.00051
90.96	-0.00091	-0.00074
91.2	-0.00046	-0.00048
91.44	-0.00037	-0.00073
91.68	-0.00028	-0.00036
91.92	-0.00045	-0.00048
92.16	-0.00051	-0.00073
92.4	-0.00053	-0.00083
92.64	-0.00069	-0.00079
92.88	-0.00067	-0.00077
93.12	-0.00041	-0.00053
93.36	-0.00047	-0.00077
93.6	-0.00022	-0.00084
93.84	-0.0006	-0.00075
94.08	-0.00048	-0.00072
94.32	1.8e-05	-0.00079
94.56	-0.00057	-0.00026
94.8	-0.00094	-0.00057
95.04	-0.00076	-0.00071
95.28	-0.00112	-0.00067
95.52	-0.00094	-0.00087
95.76	-0.00053	-0.00089
96	-0.00029	-0.00056
96.24	-0.00115	-0.00069
96.48	-0.00077	-0.00037
96.72	-0.00058	-0.00081
96.96	-0.00038	-0.00063
97.2	-0.00071	-0.00055
97.44	-0.00062	-0.00067
97.68	-0.00047	-0.00073
97.92	-0.00037	-0.00112
98.16	-0.00026	-0.00093
98.4	-0.00064	-0.00117
98.64	-0.00033	-0.00074
98.88	-0.00069	-0.00079
99.12	-0.00066	-0.00098
99.36	-0.00094	-0.00097
99.6	-0.00058	-0.0008
99.84	-0.00056	-0.00075
100.08	-0.00041	-0.00063
100.32	-0.00079	-0.00063
100.56	-0.00037	-0.00056
100.8	-0.0006	-0.00074
101.04	-0.00037	-0.00046
101.28	-0.00095	-0.00111
101.52	-0.00088	-0.00091
101.76	-0.00111	-0.00082
102	-0.00068	-0.00058
102.24	-0.00079	-0.00056
102.48	-0.0005	-0.00073
102.72	-0.00082	-0.00063
102.96	-0.00093	-0.00089
103.2	-0.00089	-0.0007
103.44	-0.00093	-0.00099
103.68	-0.00059	-0.00057
103.92	-0.00051	-0.00056
104.16	-0.00059	-0.00063
104.4	-0.00074	-0.00089
104.64	-0.00069	-0.00068
104.88	-0.00095	-0.00061
105.12	-0.00086	-0.00058
105.36	-0.00092	-0.00039
105.6	-0.0009	-0.00091
105.84	-0.00065	-0.00054
106.08	-0.00052	-0.00059
106.32	-0.00058	-0.00092
106.56	-0.00077	-0.00109
106.8	-0.00099	-0.00074
107.04	-0.00058	-0.00086
107.28	-0.00078	-0.00094
107.52	-0.00084	-0.00068
107.76	-0.00067	-0.00094
108	-0.00085	-0.00069
108.24	-0.0011	-0.001
108.48	-0.00104	-0.00063
108.72	-0.00081	-0.0009
108.96	-0.00075	-0.00087
109.2	-0.00072	-0.00062
109.44	-7.7e-05	-0.0012
109.68	-0.00064	-0.00083
109.92	-0.00075	-0.00115
110.16	-0.00078	-0.00065
110.4	-0.00092	-0.00084
110.64	-0.00046	-0.00074
110.88	-0.00067	-0.00077
111.12	-0.0013	-0.00092
111.36	-0.00051	-0.00089
111.6	-0.00074	-0.00113
111.84	-0.00048	-0.00078
112.08	-0.00085	-0.00105
112.32	-0.00099	-0.00045
112.56	-0.00114	-0.00081
112.8	-0.00065	-0.00086
113.04	-0.00066	-0.00052
113.28	-0.00081	-0.00089
113.52	-0.0009	-0.00077
113.76	-0.00123	-0.00081
114	-0.00061	-0.00079
114.24	-0.00046	-0.00107
114.48	-0.00084	-0.0006
114.72	-0.00091	-0.00084
114.96	-0.00135	-0.00088
115.2	-0.00032	-0.0008
115.44	-0.00068	-0.00102
115.68	-0.00076	-0.00127
115.92	-0.00042	-0.00088
116.16	-0.00127	-0.00131
116.4	-0.00081	-0.00099
116.64	-0.00055	-0.00097
116.88	-0.00065	-0.00089
117.12	-0.0011	-0.00105
117.36	-0.00075	-0.00079
117.6	-0.0008	-0.00075
117.84	-0.00066	-0.00093
118.08	-0.00076	-0.00089
118.32	-0.00046	-0.00113
118.56	-0.00076	-0.00103
118.8	-0.00129	-0.00129
119.04	-0.00086	-0.00119
119.28	-0.00065	-0.00068
119.52	-0.00125	-0.00089
119.76	-0.00105	-0.00095
120	-0.00016	-0.00073
120.24	-0.00082	-0.00107
120.48	-0.00123	-0.00102
120.72	-0.00061	-0.00095
120.96	-0.00068	-0.0009
121.2	-0.001	-0.00092
121.44	-0.0005	-0.00118
121.68	-0.00074	-0.00084
121.92	-0.00072	-0.00075
122.16	-0.00134	-0.00105
122.4	-0.00069	-0.00142
122.64	-0.00087	-0.00097
122.88	-0.00064	-0.00118
123.12	-0.00091	-0.00104
123.36	-0.00052	-0.00097
123.6	-0.00074	-0.00149
123.84	-0.00054	-0.00078
124.08	-0.00086	-0.00069
124.32	-0.00093	-0.00084
124.56	-0.00108	-0.00106
124.8	-0.00054	-0.00123
125.04	-0.00083	-0.00094
125.28	-0.00068	-0.00115
125.52	-0.0008	-0.00066
125.76	-0.00085	-0.00112
126	-0.00088	-0.00117
126.24	-0.00099	-0.00109
126.48	-0.00093	-0.0009
126.72	-0.00067	-0.00074
126.96	-0.00064	-0.00102
127.2	-0.00107	-0.00102
127.44	-0.001	-0.00089
127.68	-0.00122	-0.00083
127.92	-0.00032	-0.00126
128.16	-0.00105	-0.00117
128.4	-0.00104	-0.00106
128.64	-0.00067	-0.00115
128.88	-0.00083	-0.00093
129.12	-0.00093	-0.00123
129.36	-0.00123	-0.00109
129.6	-0.00102	-0.00073
129.84	-0.00138	-0.0008
130.08	-0.00123	-0.00126
130.32	-0.0006	-0.00098
130.56	-0.00138	-0.00108
130.8	-0.00131	-0.00079
131.04	-0.00094	-0.00119
131.28	-0.00129	-0.00084
131.52	-0.00129	-0.0009
131.76	-0.001	-0.00099
132	-0.00097	-0.00109
132.24	-0.00055	-0.00114
132.48	-0.00126	-0.00099
132.72	-0.00125	-0.00119
132.96	-0.00112	-0.00088
133.2	-0.00075	-0.00114
133.44	-0.00091	-0.00126
133.68	-0.00095	-0.00121
133.92	-0.00116	-0.00119
134.16	-0.00071	-0.0008
134.4	-0.00105	-0.00103
134.64	-0.00063	-0.00128
134.88	-0.00112	-0.00094
135.12	-0.00092	-0.00098
135.36	-0.00087	-0.00108
135.6	-0.00052	-0.00094
135.84	-0.0009	-0.0012
136.08	-0.00064	-0.00115
136.32	-0.00118	-0.00092
136.56	-0.00101	-0.00122
136.8	-0.0004	-0.00094
137.04	-0.00063	-0.00091
137.28	-0.00118	-0.00116
137.52	-0.00097	-0.0008
137.76	-0.00089	-0.00137
138	-0.00127	-0.00104
138.24	-0.00086	-0.00093
138.48	-0.00074	-0.00121
138.72	-0.00117	-0.0011
138.96	-0.00079	-0.00122
139.2	-0.00091	-0.00093
139.44	-0.00117	-0.00123
139.68	-0.00094	-0.00098
139.92	-0.00104	-0.00123
140.16	-0.00127	-0.00105
140.4	-0.0014	-0.00103
140.64	-0.00113	-0.00133
140.88	-0.00105	-0.00073
141.12	-0.00081	-0.00101
141.36	-0.00085	-0.00055
141.6	-0.00107	-0.00118
141.84	-0.00136	-0.00095
142.08	-0.00085	-0.00096
142.32	-0.00071	-0.00082
142.56	-0.00073	-0.00158
142.8	-0.00117	-0.00113
143.04	-0.0009	-0.00096
143.28	-0.00098	-0.00136
143.52	-0.00087	-0.001
143.76	-0.00105	-0.00139
144	-0.00089	-0.00081
144.24	-0.0005	-0.001
144.48	-0.00116	-0.00086
144.72	-0.00117	-0.00125
144.96	-0.00124	-0.00136
145.2	-0.00095	-0.00122
145.44	-0.00111	-0.00105
145.68	-0.00062	-0.00097
145.92	-0.00136	-0.00121
146.16	-0.00086	-0.00111
146.4	-0.00104	-0.00146
146.64	-0.00154	-0.00125
146.88	-0.00114	-0.00102
147.12	-0.00103	-0.001
147.36	-0.00077	-0.00149
147.6	-0.00097	-0.00151
147.84	-0.00115	-0.00113
148.08	-0.00108	-0.0009
148.32	-0.00101	-0.00123
148.56	-0.00144	-0.0012
148.8	-0.0011	-0.0008
149.04	-0.001	-0.001
149.28	-0.00125	-0.0016
149.52	-0.00094	-0.00109
149.76	-0.00085	-0.00113
150	-0.00109	-0.00146
150.24	-0.00084	-0.00134
150.48	-0.00122	-0.00146
150.72	-0.00101	-0.00165
150.96	-0.0016	-0.00122
151.2	-0.00069	-0.0011
151.44	-0.00124	-0.00086
151.68	-0.00087	-0.00126
151.92	-0.001	-0.00115
152.16	-0.00102	-0.00136
152.4	-0.0011	-0.00121
152.64	-0.00126	-0.00094
152.88	-0.0014	-0.00125
153.12	-0.00123	-0.00099
153.36	-0.00145	-0.00168
153.6	-0.00096	-0.0011
153.84	-0.00041	-0.00177
154.08	-0.00117	-0.00142
154.32	-0.00094	-0.00168
154.56	-0.00104	-0.00122
154.8	-0.00153	-0.00121
155.04	-0.00093	-0.00123
155.28	-0.00114	-0.0015
155.52	-0.00126	-0.00134
155.76	-0.00084	-0.00115
156	-0.00127	-0.00158
156.24	-0.00097	-0.00141
156.48	-0.00121	-0.00138
156.72	-0.00091	-0.0014
156.96	-0.001	-0.00159
157.2	-0.00071	-0.00133
157.44	-0.00108	-0.00169
157.68	-0.00105	-0.00127
157.92	-0.00109	-0.00138
158.16	-0.00078	-0.00144
158.4	-0.00091	-0.00131
158.64	-0.00129	-0.00116
158.88	-0.00105	-0.00141
159.12	-0.00117	-0.00135
159.36	-0.00104	-0.00111
159.6	-0.00116	-0.0014
159.84	-0.00142	-0.00131
160.08	-0.00108	-0.00148
160.32	-0.00106	-0.00176
160.56	-0.00134	-0.0011
160.8	-0.00113	-0.00141
161.04	-0.00104	-0.00097
161.28	-0.00119	-0.0013
161.52	-0.00096	-0.00112
161.76	-0.00111	-0.00144
162	-0.00149	-0.00115
162.24	-0.00104	-0.00119
162.48	-0.00126	-0.00148
162.72	-0.0011	-0.00142
162.96	-0.00079	-0.00136
163.2	-0.00125	-0.00138
163.44	-0.00148	-0.00125
163.68	-0.00136	-0.00169
163.92	-0.00083	-0.00177
164.16	-0.00143	-0.00159
164.4	-0.00167	-0.00153
164.64	-0.0014	-0.00137
164.88	-0.00106	-0.00126
165.12	-0.0016	-0.00136
165.36	-0.00118	-0.00153
165.6	-0.00137	-0.00157
165.84	-0.00151	-0.00128
166.08	-0.00131	-0.00142
166.32	-0.00154	-0.00076
166.56	-0.00151	-0.00124
166.8	-0.00132	-0.00128
167.04	-0.00128	-0.0012
167.28	-0.00138	-0.00173
167.52	-0.00126	-0.00134
167.76	-0.00134	-0.00142
168	-0.00152	-0.00138
168.24	-0.00101	-0.00125
168.48	-0.00146	-0.00127
168.72	-0.00097	-0.00112
168.96	-0.0012	-0.00098
169.2	-0.00132	-0.00155
169.44	-0.00203	-0.00156
169.68	-0.00133	-0.00128
169.92	-0.00157	-0.00147
170.16	-0.00165	-0.00148
170.4	-0.00149	-0.00103
170.64	-0.00144	-0.00122
170.88	-0.0013	-0.00159
171.12	-0.00104	-0.00135
171.36	-0.00127	-0.0015
171.6	-0.00134	-0.00123
171.84	-0.00096	-0.00155
172.08	-0.00121	-0.00151
172.32	-0.00145	-0.00139
172.56	-0.00147	-0.00127
172.8	-0.00127	-0.00146
173.04	-0.00138	-0.00161
173.28	-0.00113	-0.00171
173.52	-0.00143	-0.00162
173.76	-0.0016	-0.0014
174	-0.00124	-0.00148
174.24	-0.00124	-0.0017
174.48	-0.00147	-0.00157
174.72	-0.00157	-0.00167
174.96	-0.0013	-0.00136
175.2	-0.00113	-0.00133
175.44	-0.00146	-0.0014
175.68	-0.00108	-0.00144
175.92	-0.00147	-0.00148
176.16	-0.00166	-0.00127
176.4	-0.00095	-0.00111
176.64	-0.00101	-0.00141
176.88	-0.00174	-0.00134
177.12	-0.00117	-0.00114
177.36	-0.00113	-0.0012
177.6	-0.00148	-0.00155
177.84	-0.00152	-0.00143
178.08	-0.00127	-0.00176
178.32	-0.00119	-0.00148
178.56	-0.00148	-0.00143
178.8	-0.00109	-0.0013
179.04	-0.00156	-0.00134
179.28	-0.00123	-0.00148
179.52	-0.00148	-0.00126
179.76	-0.00124	-0.00145
180	-0.00131	-0.00133
180.24	-0.0016	-0.00195
180.48	-0.00139	-0.00186
180.72	-0.0015	-0.00142
180.96	-0.00141	-0.00155
181.2	-0.00145	-0.00146
181.44	-0.00124	-0.00143
181.68	-0.0011	-0.00151
181.92	-0.00134	-0.00164
182.16	-0.00143	-0.00174
182.4	-0.00194	-0.00131
182.64	-0.00108	-0.00174
182.88	-0.00179	-0.00155
183.12	-0.00104	-0.00143
183.36	-0.00133	-0.00167
183.6	-0.00182	-0.00167
183.84	-0.00117	-0.0018
184.08	-0.00165	-0.00169
184.32	-0.00133	-0.00134
184.56	-0.00093	-0.00145
184.8	-0.00145	-0.00167
185.04	-0.00185	-0.00127
185.28	-0.00145	-0.0014
185.52	-0.00116	-0.00223
185.76	-0.00155	-0.00171
186	-0.00155	-0.00159
186.24	-0.00186	-0.00157
186.48	-0.00133	-0.00159
186.72	-0.00114	-0.00142
186.96	-0.00129	-0.00162
187.2	-0.00124	-0.00149
187.44	-0.00128	-0.00153
187.68	-0.0014	-0.00172
187.92	-0.0013	-0.00157
188.16	-0.0017	-0.00166
188.4	-0.001	-0.00109
188.64	-0.00178	-0.00133
188.88	-0.00151	-0.00172
189.12	-0.00143	-0.00164
189.36	-0.00126	-0.0015
189.6	-0.00147	-0.00154
189.84	-0.00131	-0.00147
190.08	-0.00168	-0.0016
190.32	-0.00089	-0.00164
190.56	-0.00189	-0.00165
190.8	-0.00135	-0.00173
191.04	-0.00136	-0.00158
191.28	-0.00089	-0.00146
191.52	-0.0016	-0.00143
191.76	-0.00159	-0.00153
192	-0.00101	-0.0014
192.24	-0.00147	-0.00182
192.48	-0.00156	-0.00165
192.72	-0.00134	-0.00163
192.96	-0.00147	-0.00142
193.2	-0.00141	-0.0016
193.44	-0.00177	-0.00187
193.68	-0.00187	-0.00151
193.92	-0.0013	-0.00188
194.16	-0.00107	-0.00137
194.4	-0.00167	-0.00209
194.64	-0.00135	-0.00175
194.88	-0.00142	-0.00134
195.12	-0.00157	-0.00164
195.36	-0.00141	-0.00169
195.6	-0.00147	-0.00156
195.84	-0.00188	-0.00187
196.08	-0.00094	-0.00147
196.32	-0.00178	-0.00179
196.56	-0.0016	-0.0013
196.8	-0.00174	-0.00158
197.04	-0.00192	-0.00144
197.28	-0.00148	-0.00186
197.52	-0.00133	-0.00143
197.76	-0.00146	-0.00167
198	-0.0016	-0.00143
198.24	-0.00164	-0.00156
198.48	-0.00122	-0.00169
198.72	-0.00175	-0.00161
198.96	-0.00131	-0.0017
199.2	-0.00151	-0.0017
199.44	-0.00164	-0.00166
199.68	-0.00111	-0.00113
199.92	-0.00096	-0.00151
200.16	-0.00165	-0.00171
200.4	-0.00169	-0.00169
200.64	-0.00123	-0.00186
200.88	-0.00136	-0.00212
201.12	-0.00139	-0.00177
201.36	-0.00153	-0.00166
201.6	-0.00159	-0.00181
201.84	-0.00183	-0.00199
202.08	-0.00184	-0.00144
202.32	-0.00153	-0.00185
202.56	-0.0016	-0.0021
202.8	-0.00171	-0.00174
203.04	-0.00196	-0.00142
203.28	-0.00112	-0.002
203.52	-0.00136	-0.00181
203.76	-0.00138	-0.00172
204	-0.00124	-0.00169
204.24	-0.00152	-0.0017
204.48	-0.00147	-0.00166
204.72	-0.00174	-0.00167
204.96	-0.00155	-0.00144
205.2	-0.00139	-0.0016
205.44	-0.00104	-0.00157
205.68	-0.00184	-0.00156
205.92	-0.0017	-0.00172
206.16	-0.00133	-0.00175
206.4	-0.00124	-0.00155
206.64	-0.00122	-0.00191
206.88	-0.00184	-0.00149
207.12	-0.0014	-0.0018
207.36	-0.00149	-0.00194
207.6	-0.00162	-0.00184
207.84	-0.00135	-0.00138
208.08	-0.00155	-0.00173
208.32	-0.00192	-0.00163
208.56	-0.00155	-0.00158
208.8	-0.00129	-0.00195
209.04	-0.00141	-0.00169
209.28	-0.00168	-0.00162
209.52	-0.0015	-0.00148
209.76	-0.00171	-0.00174
210	-0.0016	-0.00173
210.24	-0.0017	-0.00198
210.48	-0.00121	-0.00155
210.72	-0.00147	-0.00192
210.96	-0.00147	-0.00211
211.2	-0.00143	-0.00129
211.44	-0.00163	-0.00179
211.68	-0.00154	-0.00169
211.92	-0.00171	-0.00193
212.16	-0.00126	-0.00149
212.4	-0.00155	-0.00176
212.64	-0.00157	-0.00172
212.88	-0.00175	-0.00195
213.12	-0.0019	-0.00123
213.36	-0.00165	-0.00188
213.6	-0.00185	-0.00176
213.84	-0.0015	-0.00198
214.08	-0.0019	-0.00169
214.32	-0.00102	-0.00178
214.56	-0.00207	-0.00161
214.8	-0.00183	-0.00154
215.04	-0.00185	-0.00176
215.28	-0.00151	-0.00186
215.52	-0.00159	-0.00164
215.76	-0.0018	-0.00196
216	-0.00145	-0.00166
216.24	-0.00176	-0.00153
216.48	-0.00151	-0.00175
216.72	-0.00163	-0.00191
216.96	-0.0019	-0.00175
217.2	-0.00139	-0.00183
217.44	-0.00204	-0.00182
217.68	-0.00121	-0.0018
217.92	-0.00143	-0.00192
218.16	-0.00159	-0.00192
218.4	-0.00167	-0.00211
218.64	-0.00104	-0.0021
218.88	-0.00152	-0.00174
219.12	-0.00196	-0.00158
219.36	-0.00155	-0.00205
219.6	-0.00198	-0.0013
219.84	-0.0016	-0.00171
220.08	-0.00151	-0.00163
220.32	-0.00181	-0.00148
220.56	-0.00152	-0.00156
220.8	-0.00183	-0.00173
221.04	-0.00153	-0.0017
221.28	-0.00121	-0.00164
221.52	-0.00144	-0.00192
221.76	-0.00153	-0.00185
222	-0.00214	-0.00176
222.24	-0.00127	-0.00171
222.48	-0.00171	-0.00175
222.72	-0.00168	-0.00206
222.96	-0.00131	-0.00185
223.2	-0.0017	-0.00167
223.44	-0.00142	-0.00226
223.68	-0.00189	-0.00187
223.92	-0.00133	-0.00179
224.16	-0.00151	-0.0018
224.4	-0.0019	-0.00198
224.64	-0.00134	-0.00202
224.88	-0.00177	-0.00157
225.12	-0.00178	-0.00159
225.36	-0.00191	-0.00212
225.6	-0.00177	-0.00212
225.84	-0.00133	-0.00225
226.08	-0.00157	-0.00183
226.32	-0.00172	-0.00129
226.56	-0.00158	-0.00181
226.8	-0.00163	-0.00169
227.04	-0.00144	-0.00169
227.28	-0.0021	-0.00185
227.52	-0.00176	-0.00226
227.76	-0.00179	-0.00217
228	-0.00161	-0.00184
228.24	-0.0019	-0.0017
228.48	-0.00182	-0.0018
228.72	-0.00166	-0.00164
228.96	-0.00211	-0.00176
229.2	-0.00155	-0.00214
229.44	-0.00205	-0.00176
229.68	-0.00177	-0.00185
229.92	-0.00192	-0.00201
230.16	-0.00163	-0.00166
230.4	-0.00197	-0.00164
230.64	-0.00171	-0.00191
230.88	-0.00154	-0.00215
231.12	-0.00172	-0.00225
231.36	-0.00164	-0.0019
231.6	-0.00186	-0.00182
231.84	-0.00141	-0.00215
232.08	-0.0021	-0.0019
232.32	-0.00134	-0.00193
232.56	-0.00202	-0.00186
232.8	-0.00183	-0.00206
233.04	-0.00166	-0.00182
233.28	-0.00174	-0.00201
233.52	-0.00182	-0.00209
233.76	-0.00155	-0.0016
234	-0.00213	-0.00182
234.24	-0.00185	-0.00216
234.48	-0.00178	-0.00167
234.72	-0.00204	-0.00177
234.96	-0.00137	-0.00216
235.2	-0.00162	-0.0021
235.44	-0.00175	-0.00157
235.68	-0.00179	-0.00198
235.92	-0.00152	-0.00211
236.16	-0.00189	-0.00183
236.4	-0.00159	-0.00205
236.64	-0.0014	-0.00182
236.88	-0.0017	-0.00206
237.12	-0.00194	-0.00232
237.36	-0.00135	-0.00211
237.6	-0.00187	-0.002
237.84	-0.00181	-0.00202
238.08	-0.00191	-0.00234
238.32	-0.00182	-0.00189
238.56	-0.00147	-0.00194
238.8	-0.00217	-0.00188
239.04	-0.00169	-0.00221
239.28	-0.00168	-0.00178
239.52	-0.0015	-0.00188
239.76	-0.00162	-0.0018

## Sheet: M4R
Time	Exp1	Exp2
0	0.000227178	3.13188e-06
0.24	-0.000168752	9.42358e-05
0.48	0.000210767	0.000399273
0.72	0.000325677	0.000142725
0.96	0.000165359	0.00061913
1.2	-0.000740621	-0.000189934
1.44	-4.06998e-05	0.000503553
1.68	7.29967e-05	0.000499627
1.92	0.00018454	0.000400496
2.16	0.000885292	0.000262916
2.4	0.000655259	0.000856458
2.64	2.6947e-05	0.000455567
2.88	0.000686769	-0.000205486
3.12	0.000100311	0.000182595
3.36	0.000227989	0.000203401
3.6	0.00107417	0.000357164
3.84	0.000373951	0.000457727
4.08	-1.86823e-05	0.000836438
4.32	3.38832e-05	0.000979084
4.56	-0.000479046	-0.000467832
4.8	-0.000121566	0.000197099
5.04	0.000190965	0.000279743
5.28	3.93974e-05	0.000955249
5.52	9.65299e-05	0.000107463
5.76	-3.96164e-05	3.01121e-05
6	0.000458233	0.000207531
6.24	0.000660907	-0.000304669
6.48	-0.000350258	0.00010687
6.72	0.00022543	6.17186e-05
6.96	0.00128238	0.000121933
7.2	-0.000163109	-0.000305723
7.44	-0.000132099	-0.000165945
7.68	0.000232138	0.000164778
7.92	-0.000201198	0.000112672
8.16	-0.000191301	-0.000272749
8.4	-0.000447987	-0.000108471
8.64	-0.00039308	0.000438068
8.88	-0.000194166	-7.49964e-05
9.12	0.000698997	0.000323367
9.36	0.000199169	0.000267179
9.6	-4.72801e-05	-0.000105061
9.84	-0.000684235	-0.00022081
10.08	0.000247858	1.30185e-05
10.32	0.000402249	-0.000147279
10.56	0.000503842	0.00015206
10.8	0.000388886	0.000795018
11.04	0.000279954	0.000286581
11.28	-0.000562301	-4.61187e-05
11.52	7.23278e-05	0.000705705
11.76	0.000332468	0.000361917
12	0.000186034	-0.000243501
12.24	0.000428244	-0.000135763
12.48	9.53591e-05	0.000238509
12.72	-7.60759e-05	-0.00014585
12.96	-0.000440658	0.000261672
13.2	-0.000133366	-5.03669e-06
13.44	0.000293686	0.000194461
13.68	6.11545e-05	0.000283697
13.92	-0.00032313	0.000205931
14.16	-0.000137669	0.000166624
14.4	0.000380207	0.000851655
14.64	-0.000378605	-7.87217e-05
14.88	0.000101977	0.000132346
15.12	5.48926e-05	-0.000535714
15.36	0.000373828	-0.000371374
15.6	0.000128867	0.000371878
15.84	9.1767e-05	-0.000209118
16.08	-0.000108478	6.67773e-05
16.32	0.000181324	-0.000584872
16.56	-0.000258589	8.76386e-05
16.8	0.000559128	9.75504e-06
17.04	-0.000207638	-0.000222053
17.28	0.00082979	0.000243428
17.52	-0.000163057	-0.000352869
17.76	-0.000353821	0.000128861
18	0.000331225	-0.000348879
18.24	-8.4451e-05	-0.000356296
18.48	3.83089e-05	-0.000181924
18.72	0.000268592	1.79101e-05
18.96	-4.96109e-05	-0.00021177
19.2	0.000131914	5.04214e-05
19.44	-0.000138291	-0.00020883
19.68	-0.000425263	-0.000551232
19.92	-0.000394806	0.000262055
20.16	0.000517465	0.000170101
20.4	-0.000337956	0.000348274
20.64	0.000157187	0.000249277
20.88	0.000342032	-0.000172948
21.12	-0.000559523	-0.000714639
21.36	-2.32202e-05	-0.000636262
21.6	-0.000380797	-0.000503317
21.84	0.000370355	-0.000356934
22.08	0.000160034	-0.000577683
22.32	-0.000597842	-0.00049533
22.56	0.000154339	-0.000197554
22.8	-0.000161629	-3.30292e-05
23.04	-0.000477446	-0.000561497
23.28	0.000332479	-0.000656509
23.52	-0.000414778	-9.55944e-05
23.76	0.00035235	-3.93225e-05
24	-2.80719e-05	-0.000328352
24.24	-0.000495962	-0.000356133
24.48	-0.000575216	6.59666e-05
24.72	-0.000810282	-2.70964e-05
24.96	-0.000576492	6.47862e-05
25.2	-0.000171564	-0.00030175
25.44	-0.000831688	-0.000638872
25.68	-4.84608e-05	-0.0001706
25.92	-0.000458473	0.000235091
26.16	-0.000431142	5.9969e-06
26.4	-0.000375549	9.44608e-05
26.64	0.00015533	-0.000404692
26.88	0.000366698	-0.000348607
27.12	-3.64206e-05	-0.000383134
27.36	-3.09061e-06	-0.00038985
27.6	2.45076e-05	-0.000308948
27.84	-0.000461043	-0.000156171
28.08	-0.000242652	-0.000215729
28.32	-0.000312975	-0.000438233
28.56	0.000285593	-0.000222257
28.8	-0.000741012	-0.000194789
29.04	0.000492478	-7.95558e-05
29.28	-0.000637108	-0.000172455
29.52	-0.000501626	-0.000319726
29.76	-0.000468444	0.000107265
30	4.93198e-06	-0.000273793
30.24	0.00167202	0.000384623
30.48	0.00215947	0.000957919
30.72	-0.0088931	-0.00957801
30.96	0.008334086*	0.008528118*
31.2	-0.0704743	-0.0735116
31.44	0.181247	0.189379
31.68	0.0253676	0.0244304
31.92	0.0056601	0.00323386
32.16	0.00641028	0.00281638
32.4	0.00569564	0.00370975
32.64	0.00644979	0.00333894
32.88	0.00621004	0.0042457
33.12	0.00659643	0.00444366
33.36	0.00702923	0.00420967
33.6	0.00763168	0.00425441
33.84	0.00812059	0.00486019
34.08	0.00671328	0.00456783
34.32	0.00743935	0.00497211
34.56	0.00701812	0.00467565
34.8	0.0072873	0.00489402
35.04	0.0077923	0.00523748
35.28	0.00734363	0.00553018
35.52	0.00838075	0.00485747
35.76	0.00762597	0.0048553
36	0.00828748	0.00545403
36.24	0.00831136	0.00538383
36.48	0.00826612	0.00522775
36.72	0.00783022	0.0054591
36.96	0.00917949	0.00568338
37.2	0.00785213	0.00571236
37.44	0.00755369	0.00546237
37.68	0.00844472	0.00479657
37.92	0.00775998	0.00532273
38.16	0.00835671	0.00600251
38.4	0.00853716	0.00478703
38.64	0.00911705	0.00555214
38.88	0.00758661	0.00479928
39.12	0.00877613	0.00530631
39.36	0.00806739	0.00598273
39.6	0.00863943	0.00584524
39.84	0.00863164	0.00542563
40.08	0.00808997	0.00557202
40.32	0.00772667	0.00591099
40.56	0.00887941	0.00520841
40.8	0.00860202	0.00584363
41.04	0.00814818	0.00590679
41.28	0.008279	0.00575113
41.52	0.00852424	0.00604139
41.76	0.00853449	0.00525029
42	0.00868449	0.00613695
42.24	0.00803384	0.00580137
42.48	0.00856442	0.00595154
42.72	0.00913342	0.00653956
42.96	0.00996608	0.00584335
43.2	0.00832941	0.00586741
43.44	0.00889131	0.00546785
43.68	0.00920737	0.00638054
43.92	0.00931114	0.00628522
44.16	0.00831874	0.00632258
44.4	0.00879253	0.00598083
44.64	0.00871865	0.00659442
44.88	0.0092156	0.00599011
45.12	0.00897808	0.00609033
45.36	0.00876923	0.00644309
45.6	0.00852816	0.00681295
45.84	0.00929908	0.00657244
46.08	0.00976408	0.00619659
46.32	0.00842617	0.00624604
46.56	0.00989715	0.00628941
46.8	0.00896165	0.0061162
47.04	0.00851722	0.00639407
47.28	0.00898457	0.00683753
47.52	0.00875998	0.00634769
47.76	0.00874045	0.00625705
48	0.00880748	0.00609787
48.24	0.00853523	0.00616462
48.48	0.00884248	0.00591693
48.72	0.00873967	0.00652793
48.96	0.00905461	0.00663811
49.2	0.00902541	0.00594919
49.44	0.00902429	0.0064077
49.68	0.00907866	0.00699187
49.92	0.00926711	0.00654616
50.16	0.00919963	0.00560019
50.4	0.00929149	0.0064169
50.64	0.00952961	0.00688698
50.88	0.00884271	0.00657838
51.12	0.00938295	0.00631573
51.36	0.00866179	0.005893
51.6	0.00911622	0.00627857
51.84	0.00850909	0.00580248
52.08	0.008778	0.00629079
52.32	0.00920025	0.00625047
52.56	0.00923366	0.00609937
52.8	0.00858834	0.00665223
53.04	0.00970142	0.00597429
53.28	0.00923962	0.00678468
53.52	0.00911068	0.00658867
53.76	0.00894364	0.00629746
54	0.00892473	0.00621788
54.24	0.00913574	0.005887
54.48	0.00901124	0.00579351
54.72	0.00896419	0.00674617
54.96	0.00961581	0.0060722
55.2	0.0087069	0.00643125
55.44	0.00941385	0.00661315
55.68	0.00889455	0.00678219
55.92	0.00928249	0.00626242
56.16	0.00892649	0.00633129
56.4	0.00902654	0.00629153
56.64	0.00951413	0.00581553
56.88	0.00804352	0.00624043
57.12	0.00931421	0.00643886
57.36	0.00871783	0.00653679
57.6	0.00863965	0.00692365
57.84	0.00997412	0.00601022
58.08	0.00876475	0.0062662
58.32	0.00870066	0.00657948
58.56	0.00834863	0.0063015
58.8	0.00904847	0.00647294
59.04	0.00903948	0.00637836
59.28	0.00941924	0.00659207
59.52	0.00941723	0.00641457
59.76	0.00918325	0.0061187
60	0.00879754	0.0062821
60.24	0.00923887	0.00626153
60.48	0.00945746	0.00685608
60.72	0.00888395	0.00660405
60.96	0.0085157	0.00709871
61.2	0.00894243	0.00647406
61.44	0.00953815	0.00608702
61.68	0.00942868	0.00627028
61.92	0.0093545	0.00601102
62.16	0.00914194	0.0066358
62.4	0.00937092	0.00602409
62.64	0.00904743	0.00672426
62.88	0.00910854	0.00624705
63.12	0.00967115	0.00633388
63.36	0.00886664	0.00618373
63.6	0.00885673	0.0069835
63.84	0.00822381	0.00675457
64.08	0.00909985	0.00561127
64.32	0.00868412	0.00628547
64.56	0.00895617	0.00645561
64.8	0.00914365	0.00654978
65.04	0.00964464	0.00688056
65.28	0.00894196	0.00655724
65.52	0.009343	0.0064852
65.76	0.00957893	0.006487
66	0.0086565	0.00647404
66.24	0.00953279	0.00616412
66.48	0.00881115	0.00623875
66.72	0.00920629	0.00653147
66.96	0.00906284	0.00649922
67.2	0.00920204	0.00660486
67.44	0.00909816	0.0066028
67.68	0.00931123	0.00623314
67.92	0.00883857	0.00672439
68.16	0.0086809	0.00655353
68.4	0.00935218	0.00568321
68.64	0.00949079	0.00670472
68.88	0.00900553	0.00659856
69.12	0.00843944	0.00655783
69.36	0.00951004	0.00605514
69.6	0.00975852	0.00654215
69.84	0.00914321	0.00702845
70.08	0.00960218	0.00639866
70.32	0.00949177	0.00693153
70.56	0.00993415	0.00622504
70.8	0.00907296	0.00603541
71.04	0.0091127	0.00652061
71.28	0.00883956	0.00697495
71.52	0.00843637	0.00658564
71.76	0.00929281	0.00664479
72	0.00943965	0.00649603
72.24	0.0089398	0.00628948
72.48	0.00900997	0.00675865
72.72	0.00882614	0.00608455
72.96	0.00932471	0.00635925
73.2	0.00858471	0.00654557
73.44	0.00925385	0.00681825
73.68	0.00850229	0.00629785
73.92	0.00850722	0.00633199
74.16	0.0087398	0.00697733
74.4	0.00873115	0.00656391
74.64	0.00947015	0.00663112
74.88	0.00973468	0.00625798
75.12	0.00859118	0.00647549
75.36	0.00923597	0.00648703
75.6	0.00823521	0.0064439
75.84	0.00899384	0.00614754
76.08	0.00966793	0.00638523
76.32	0.00809579	0.00681458
76.56	0.00882563	0.00642726
76.8	0.00912366	0.00664575
77.04	0.0090605	0.00660573
77.28	0.00927318	0.00668717
77.52	0.00886252	0.00663747
77.76	0.00921342	0.00687311
78	0.00865321	0.00630011
78.24	0.00973777	0.00640192
78.48	0.00897269	0.00683462
78.72	0.00909284	0.00623635
78.96	0.00879494	0.00650487
79.2	0.00964761	0.00642859
79.44	0.00845614	0.00598125
79.68	0.00841086	0.00651269
79.92	0.00869486	0.0061637
80.16	0.00852853	0.00702594
80.4	0.00847601	0.00619474
80.64	0.00898099	0.00617112
80.88	0.00844125	0.00600764
81.12	0.00949751	0.00611864
81.36	0.00853962	0.00653041
81.6	0.00923728	0.00664209
81.84	0.00864835	0.00676278
82.08	0.00874063	0.00668836
82.32	0.00871142	0.00630072
82.56	0.0092204	0.00624486
82.8	0.00887781	0.00608454
83.04	0.00898449	0.00668169
83.28	0.00835456	0.00640856
83.52	0.0089455	0.00618766
83.76	0.00839658	0.00631831
84	0.00875089	0.00643042
84.24	0.00912306	0.00650535
84.48	0.00883221	0.00615139
84.72	0.00847202	0.00621543
84.96	0.00886297	0.00664981
85.2	0.00846707	0.00715813
85.44	0.00854555	0.00694636
85.68	0.00924363	0.00681404
85.92	0.00847949	0.00590108
86.16	0.00865941	0.00604327
86.4	0.00862535	0.00616787
86.64	0.00896524	0.00651804
86.88	0.00906632	0.00684406
87.12	0.00811569	0.00648109
87.36	0.00861588	0.00644997
87.6	0.00869564	0.00621408
87.84	0.00848232	0.00549935
88.08	0.00863947	0.00665713
88.32	0.00867275	0.00658992
88.56	0.00900644	0.00607066
88.8	0.00829962	0.00610844
89.04	0.00897549	0.00631339
89.28	0.00855011	0.00601396
89.52	0.00895256	0.00668499
89.76	0.00842096	0.00593082
90	0.00882125	0.00603171
90.24	0.00843779	0.00614113
90.48	0.00771185	0.00677175
90.72	0.00919702	0.00575831
90.96	0.00786133	0.00605736
91.2	0.00835904	0.00610985
91.44	0.00825977	0.00625984
91.68	0.00878021	0.00595156
91.92	0.00859172	0.00612714
92.16	0.00849628	0.00653706
92.4	0.00921607	0.00641852
92.64	0.00824738	0.00656218
92.88	0.00886102	0.00613242
93.12	0.00866226	0.00614232
93.36	0.00853969	0.00641449
93.6	0.00869794	0.00630511
93.84	0.00845422	0.00583338
94.08	0.00806776	0.00581782
94.32	0.00796737	0.00627208
94.56	0.00851963	0.00609218
94.8	0.00823247	0.0057949
95.04	0.00840811	0.00638806
95.28	0.00871452	0.00620392
95.52	0.0084039	0.00583731
95.76	0.00803485	0.00606298
96	0.00868363	0.00515939
96.24	0.00866856	0.00619597
96.48	0.00829618	0.00602955
96.72	0.00889635	0.00634555
96.96	0.00812004	0.00532846
97.2	0.00872404	0.00656586
97.44	0.0090894	0.00657809
97.68	0.00779383	0.00625419
97.92	0.00806596	0.00652105
98.16	0.0088993	0.00546363
98.4	0.00871215	0.00665895
98.64	0.00908158	0.00575026
98.88	0.00851384	0.00587269
99.12	0.00854153	0.00580046
99.36	0.00808899	0.00581949
99.6	0.00848501	0.00597409
99.84	0.00848617	0.00637279
100.08	0.00912225	0.00616746
100.32	0.00868752	0.00652572
100.56	0.00888583	0.00701821
100.8	0.00843138	0.00607186
101.04	0.00805198	0.00599831
101.28	0.00835428	0.00562818
101.52	0.00855764	0.00539899
101.76	0.00912325	0.00548462
102	0.0084725	0.0059008
102.24	0.00806417	0.00516965
102.48	0.00815351	0.00638254
102.72	0.00837899	0.00565926
102.96	0.00825275	0.00553896
103.2	0.0080128	0.00631076
103.44	0.00828495	0.00626054
103.68	0.008476	0.00625565
103.92	0.00893251	0.00577143
104.16	0.0086048	0.00674788
104.4	0.00760752	0.0060135
104.64	0.00841953	0.00568473
104.88	0.00782631	0.0060741
105.12	0.00847182	0.0054099
105.36	0.00839732	0.00577993
105.6	0.00834205	0.00589732
105.84	0.00784243	0.00526004
106.08	0.00738087	0.00615109
106.32	0.00850276	0.00533463
106.56	0.00861595	0.00644775
106.8	0.00800044	0.006141
107.04	0.00806465	0.00589332
107.28	0.0081478	0.00583785
107.52	0.00822537	0.0060732
107.76	0.00833484	0.00553984
108	0.0075562	0.00597852
108.24	0.00804972	0.00561807
108.48	0.00804882	0.00530997
108.72	0.00761399	0.0059577
108.96	0.00845258	0.00575105
109.2	0.0081907	0.00529744
109.44	0.00804293	0.00527753
109.68	0.00774834	0.00564586
109.92	0.00796197	0.00542571
110.16	0.00776823	0.00582174
110.4	0.00749597	0.00565333
110.64	0.00758362	0.00554888
110.88	0.00763415	0.00576459
111.12	0.0085481	0.00563652
111.36	0.00824274	0.00532286
111.6	0.00816338	0.00528001
111.84	0.00793112	0.00544794
112.08	0.0079484	0.00573897
112.32	0.0072753	0.00546316
112.56	0.00806966	0.00561441
112.8	0.00811141	0.00623654
113.04	0.00837161	0.00617728
113.28	0.00773149	0.00608037
113.52	0.00668621	0.00561924
113.76	0.00795461	0.00557185
114	0.00805153	0.00545587
114.24	0.00749965	0.00535834
114.48	0.00807738	0.0060336
114.72	0.00740215	0.00575494
114.96	0.00807193	0.00557159
115.2	0.00789873	0.00570948
115.44	0.00795542	0.00599181
115.68	0.00799116	0.00518779
115.92	0.00794248	0.00554924
116.16	0.00792093	0.00554216
116.4	0.00816505	0.00546164
116.64	0.00741642	0.00541588
116.88	0.00829415	0.00543651
117.12	0.00799794	0.00608542
117.36	0.00723464	0.0059485
117.6	0.00849882	0.00572869
117.84	0.00725461	0.00554996
118.08	0.00802652	0.00515786
118.32	0.00755188	0.00590125
118.56	0.00788436	0.00576869
118.8	0.00776121	0.00620367
119.04	0.008142	0.0055904
119.28	0.00787223	0.00511505
119.52	0.00686084	0.00625048
119.76	0.00735168	0.00534602
120	0.00852295	0.00538133
120.24	0.00694391	0.00510006
120.48	0.00799745	0.00578376
120.72	0.00743264	0.00522058
120.96	0.00842235	0.00557481
121.2	0.00806473	0.00561312
121.44	0.00783708	0.0054092
121.68	0.0069944	0.0057796
121.92	0.00761169	0.0057388
122.16	0.00774121	0.00512007
122.4	0.00816813	0.00557229
122.64	0.00696669	0.00550228
122.88	0.00842235	0.00576276
123.12	0.00702584	0.00494402
123.36	0.00726846	0.00575439
123.6	0.0073623	0.00501957
123.84	0.00766931	0.00509756
124.08	0.00784378	0.00565441
124.32	0.00755248	0.00472483
124.56	0.00721682	0.00497668
124.8	0.00730743	0.00486876
125.04	0.00817325	0.00490354
125.28	0.00779776	0.00549326
125.52	0.00743752	0.00615666
125.76	0.00778057	0.00595732
126	0.00657544	0.00549585
126.24	0.00757592	0.00490095
126.48	0.00689181	0.00541557
126.72	0.00766814	0.00558945
126.96	0.00739717	0.00536262
127.2	0.00720941	0.00574344
127.44	0.00644593	0.00538477
127.68	0.00730235	0.00584188
127.92	0.00759422	0.00527159
128.16	0.00760862	0.00593612
128.4	0.00683542	0.00505981
128.64	0.00714081	0.00489589
128.88	0.00725911	0.0057136
129.12	0.00671602	0.00574403
129.36	0.00765881	0.005701
129.6	0.00802324	0.0049312
129.84	0.00709216	0.00491351
130.08	0.00677589	0.00543627
130.32	0.0079397	0.00532996
130.56	0.00796102	0.00477493
130.8	0.00748867	0.00534011
131.04	0.00674243	0.00515065
131.28	0.00798391	0.00562032
131.52	0.00723177	0.00466319
131.76	0.00719368	0.00513562
132	0.00754513	0.00539563
132.24	0.00773492	0.00475892
132.48	0.00661041	0.00543641
132.72	0.00688465	0.004623
132.96	0.00670222	0.00509524
133.2	0.0066512	0.00516095
133.44	0.00675762	0.00492583
133.68	0.00760422	0.00504718
133.92	0.00726239	0.0051686
134.16	0.00763657	0.00460225
134.4	0.00627208	0.00500427
134.64	0.00704746	0.00506992
134.88	0.0068661	0.00426602
135.12	0.00681222	0.00516353
135.36	0.00706135	0.0052546
135.6	0.00719896	0.005275
135.84	0.0064817	0.00513317
136.08	0.00770399	0.00466581
136.32	0.00659692	0.00457945
136.56	0.00745415	0.00517107
136.8	0.0070877	0.00520397
137.04	0.00669905	0.00492832
137.28	0.0069969	0.00486973
137.52	0.00699012	0.00506235
137.76	0.00676222	0.00515101
138	0.00725096	0.00464232
138.24	0.00630454	0.00449803
138.48	0.00615394	0.00485982
138.72	0.00723618	0.0042754
138.96	0.00696798	0.00471784
139.2	0.0071174	0.00465751
139.44	0.00706109	0.00507249
139.68	0.00706017	0.00496113
139.92	0.00723739	0.00510539
140.16	0.00627658	0.00494828
140.4	0.00670945	0.00502946
140.64	0.0073433	0.00522716
140.88	0.00744939	0.00461666
141.12	0.00659346	0.00470743
141.36	0.00707808	0.0044972
141.6	0.00666015	0.00490797
141.84	0.00719697	0.00489762
142.08	0.00666029	0.004713
142.32	0.00693699	0.00445355
142.56	0.00700166	0.00477595
142.8	0.00670626	0.00480385
143.04	0.00661306	0.00504968
143.28	0.0064876	0.00429121
143.52	0.00711943	0.00511059
143.76	0.00667783	0.00509026
144	0.00655421	0.00485687
144.24	0.00678609	0.00427365
144.48	0.00695674	0.00516138
144.72	0.00683341	0.00489995
144.96	0.00653581	0.00469456
145.2	0.00627899	0.00474736
145.44	0.00643733	0.00478084
145.68	0.00690469	0.00490504
145.92	0.00690703	0.00503696
146.16	0.00594079	0.00459825
146.4	0.00692918	0.00448358
146.64	0.00582585	0.00465547
146.88	0.00666638	0.00457785
147.12	0.00696938	0.00442308
147.36	0.00662203	0.00496573
147.6	0.00606819	0.00436407
147.84	0.0059673	0.00434089
148.08	0.00631643	0.00416822
148.32	0.00643212	0.00415217
148.56	0.00640765	0.00452331
148.8	0.00660645	0.00460437
149.04	0.00757315	0.00437148
149.28	0.00682766	0.00426693
149.52	0.00688087	0.00449067
149.76	0.00686398	0.00467576
150	0.00650093	0.00476982
150.24	0.0067324	0.00485378
150.48	0.00698942	0.00472401
150.72	0.00695532	0.00479998
150.96	0.00668533	0.00503186
151.2	0.00656421	0.00472868
151.44	0.00680554	0.00494779
151.68	0.00669007	0.0048638
151.92	0.00629411	0.00481285
152.16	0.00590408	0.00377683
152.4	0.00664816	0.00410781
152.64	0.00621431	0.00457116
152.88	0.00704905	0.0040296
153.12	0.00653077	0.00382318
153.36	0.00634892	0.00476649
153.6	0.00675831	0.00420618
153.84	0.00612853	0.00429283
154.08	0.00599541	0.00443046
154.32	0.00669686	0.00431188
154.56	0.00702969	0.0045264
154.8	0.00607027	0.00492729
155.04	0.00590341	0.00433113
155.28	0.00628171	0.00442063
155.52	0.00663956	0.00399452
155.76	0.006119	0.00427227
156	0.00687012	0.00394451
156.24	0.00691383	0.0045674
156.48	0.00600685	0.00451951
156.72	0.00637068	0.00414567
156.96	0.00639697	0.00402398
157.2	0.00630339	0.00418758
157.44	0.00623365	0.00458786
157.68	0.00521702	0.00483548
157.92	0.00720581	0.00459058
158.16	0.00580064	0.004733
158.4	0.00667314	0.00455946
158.64	0.00637231	0.00468983
158.88	0.00603427	0.00431228
159.12	0.00603602	0.00430137
159.36	0.00634954	0.00386205
159.6	0.00638021	0.00460567
159.84	0.00611792	0.00449533
160.08	0.00598659	0.00415441
160.32	0.00584486	0.00412237
160.56	0.00626821	0.00425018
160.8	0.00673151	0.00348062
161.04	0.00609638	0.00406947
161.28	0.00567815	0.00409652
161.52	0.00661637	0.00413114
161.76	0.00582402	0.00374686
162	0.00604063	0.00415712
162.24	0.00634635	0.0042788
162.48	0.00646121	0.00390693
162.72	0.00610924	0.00486813
162.96	0.00596947	0.00416474
163.2	0.00561179	0.00409579
163.44	0.00577878	0.0044211
163.68	0.0056427	0.00413274
163.92	0.00544144	0.00399708
164.16	0.00535728	0.0037003
164.4	0.00561228	0.00389475
164.64	0.00612851	0.00440676
164.88	0.00567157	0.00423298
165.12	0.00541518	0.00464503
165.36	0.00562156	0.00371905
165.6	0.00622045	0.00420435
165.84	0.00562473	0.00384367
166.08	0.00561758	0.00404158
166.32	0.00569174	0.00381653
166.56	0.005213	0.00441161
166.8	0.00655706	0.00358261
167.04	0.00578052	0.00388518
167.28	0.0057891	0.00397557
167.52	0.00632982	0.00390985
167.76	0.0052557	0.00403203
168	0.00575913	0.00380259
168.24	0.00551169	0.00409422
168.48	0.00615653	0.00401592
168.72	0.00532913	0.00404463
168.96	0.00650844	0.00452957
169.2	0.0060008	0.00435552
169.44	0.00570224	0.0041902
169.68	0.00558125	0.00313999
169.92	0.00599321	0.00338569
170.16	0.00584206	0.00402526
170.4	0.00516779	0.00417701
170.64	0.00542922	0.00392227
170.88	0.00574117	0.00360341
171.12	0.00536842	0.00337916
171.36	0.0053339	0.00385843
171.6	0.00529026	0.00387835
171.84	0.00540702	0.00375864
172.08	0.00520694	0.00398744
172.32	0.00533742	0.00402971
172.56	0.0058586	0.00359834
172.8	0.00527714	0.00397885
173.04	0.00597276	0.0036299
173.28	0.00552983	0.00394999
173.52	0.00580573	0.00371686
173.76	0.00519603	0.00335823
174	0.00490339	0.00335716
174.24	0.0054034	0.00337853
174.48	0.00565394	0.00452474
174.72	0.00519614	0.00347494
174.96	0.0057581	0.0030047
175.2	0.00561621	0.00362646
175.44	0.00581179	0.00355302
175.68	0.00542157	0.00323641
175.92	0.00585453	0.00356301
176.16	0.00532246	0.0037123
176.4	0.00588784	0.00403456
176.64	0.00431696	0.00409873
176.88	0.00578931	0.00370365
177.12	0.0057307	0.00333396
177.36	0.00559598	0.00414541
177.6	0.00624887	0.004154
177.84	0.00504152	0.00358443
178.08	0.00539291	0.00351446
178.32	0.00518989	0.00362684
178.56	0.00590314	0.00411446
178.8	0.00536469	0.0034436
179.04	0.00539014	0.00354679
179.28	0.00532734	0.00391938
179.52	0.00520695	0.00403365
179.76	0.00532681	0.0035799
180	0.00494281	0.00338022
180.24	0.00548261	0.00357443
180.48	0.00548134	0.00345216
180.72	0.00590379	0.00455725
180.96	0.00536826	0.00366401
181.2	0.00446623	0.00352233
181.44	0.00596656	0.00353373
181.68	0.00548716	0.00345297
181.92	0.0052661	0.00348744
182.16	0.00511074	0.00383167
182.4	0.00537376	0.00351272
182.64	0.00518681	0.00376305
182.88	0.00554055	0.00353449
183.12	0.00561271	0.00303329
183.36	0.00575067	0.00355451
183.6	0.00515919	0.00316748
183.84	0.00506125	0.00351157
184.08	0.00587496	0.00368117
184.32	0.0054977	0.00344839
184.56	0.00537101	0.0034439
184.8	0.00542297	0.00327921
185.04	0.00475079	0.00382314
185.28	0.00530744	0.00309132
185.52	0.00538009	0.00269632
185.76	0.00514192	0.00326796
186	0.00478334	0.0041459
186.24	0.00499809	0.00351708
186.48	0.00538281	0.00370703
186.72	0.00557879	0.00338067
186.96	0.00476781	0.00365228
187.2	0.00521472	0.00359678
187.44	0.00468432	0.00317831
187.68	0.0053632	0.00318897
187.92	0.00475464	0.00307854
188.16	0.00500158	0.00338619
188.4	0.00435262	0.00311837
188.64	0.00475589	0.00316923
188.88	0.00508053	0.00314133
189.12	0.00535166	0.00359237
189.36	0.00504256	0.00347209
189.6	0.00525456	0.00317417
189.84	0.00513836	0.00308443
190.08	0.00548007	0.00314727
190.32	0.00560676	0.00339174
190.56	0.00494687	0.00330278
190.8	0.00480355	0.00338769
191.04	0.00505962	0.00377994
191.28	0.00486164	0.00319979
191.52	0.00500201	0.00338046
191.76	0.00535894	0.00293874
192	0.0041913	0.00321232
192.24	0.00481999	0.0033169
192.48	0.00501815	0.00330167
192.72	0.00482072	0.00374084
192.96	0.00508515	0.00270215
193.2	0.00507558	0.00285742
193.44	0.0044986	0.00356435
193.68	0.00483397	0.00343315
193.92	0.00533825	0.00315543
194.16	0.0050124	0.00262414
194.4	0.00410732	0.00329231
194.64	0.00554406	0.00328351
194.88	0.00486614	0.003167
195.12	0.00450436	0.00245975
195.36	0.00492945	0.00281298
195.6	0.00456931	0.00308889
195.84	0.00559436	0.00273726
196.08	0.0051135	0.00305518
196.32	0.00459933	0.00264113
196.56	0.00492129	0.00332758
196.8	0.00471134	0.00246771
197.04	0.00518569	0.00310305
197.28	0.00499108	0.00242503
197.52	0.0044025	0.00248609
197.76	0.00481999	0.00297332
198	0.00413586	0.00291898
198.24	0.00473689	0.00301659
198.48	0.00539596	0.0031123
198.72	0.00492972	0.00336359
198.96	0.00465088	0.00329097
199.2	0.00430266	0.00291262
199.44	0.00462101	0.00301937
199.68	0.00481606	0.00285039
199.92	0.00494223	0.00267816
200.16	0.00470624	0.00302115
200.4	0.00456235	0.00332896
200.64	0.00447441	0.00291207
200.88	0.00483548	0.00320133
201.12	0.00511384	0.00324865
201.36	0.00523773	0.00266704
201.6	0.00463059	0.0030037
201.84	0.00484687	0.00262213
202.08	0.00400847	0.00330746
202.32	0.00441955	0.0026548
202.56	0.00440135	0.00313987
202.8	0.00430785	0.00259379
203.04	0.00459445	0.00287121
203.28	0.00438597	0.00261547
203.52	0.00388893	0.00268684
203.76	0.00382895	0.00226962
204	0.00432535	0.00271725
204.24	0.00366097	0.00271827
204.48	0.00420596	0.00365574
204.72	0.0046535	0.00263947
204.96	0.00434581	0.00284961
205.2	0.00485528	0.00334704
205.44	0.00466556	0.00292133
205.68	0.00457712	0.00303494
205.92	0.00400511	0.00310195
206.16	0.00489332	0.00293509
206.4	0.00366398	0.00268142
206.64	0.0038237	0.00314611
206.88	0.00466823	0.00278129
207.12	0.00408487	0.0029506
207.36	0.00401798	0.00280467
207.6	0.00409122	0.00306683
207.84	0.00407375	0.00292471
208.08	0.00428272	0.00247775
208.32	0.00400053	0.00274326
208.56	0.00404027	0.0024817
208.8	0.00444722	0.0023229
209.04	0.00431312	0.00308171
209.28	0.00422849	0.00265287
209.52	0.00437675	0.00218043
209.76	0.00466236	0.00250907
210	0.00493522	0.0028414
210.24	0.00416151	0.00264518
210.48	0.00423808	0.00239559
210.72	0.00467949	0.00254847
210.96	0.00517651	0.00233568
211.2	0.0041327	0.00238161
211.44	0.00430979	0.00240464
211.68	0.0040225	0.00302903
211.92	0.0041823	0.00246933
212.16	0.00422382	0.00265051
212.4	0.0045442	0.00229395
212.64	0.00453216	0.00238297
212.88	0.00423353	0.00272566
213.12	0.004692	0.00227904
213.36	0.00415823	0.00298501
213.6	0.00360493	0.00208241
213.84	0.00399197	0.00242074
214.08	0.00404798	0.00191663
214.32	0.00408951	0.00245866
214.56	0.00429599	0.00251672
214.8	0.00464425	0.00208099
215.04	0.004574	0.0022104
215.28	0.00434534	0.0025552
215.52	0.0035017	0.00257414
215.76	0.00422392	0.00270146
216	0.00489194	0.00209832
216.24	0.00392787	0.00241581
216.48	0.00464141	0.00292787
216.72	0.00373707	0.00266789
216.96	0.00342574	0.0024503
217.2	0.00443562	0.00275917
217.44	0.00419838	0.00272339
217.68	0.00414396	0.00243122
217.92	0.00474104	0.00224992
218.16	0.00420958	0.00256195
218.4	0.00420325	0.00220454
218.64	0.00394855	0.00301914
218.88	0.00458341	0.00248035
219.12	0.00386778	0.00202196
219.36	0.00407018	0.00242852
219.6	0.00396896	0.00180066
219.84	0.00414553	0.00214697
220.08	0.00415354	0.00197899
220.32	0.00377209	0.00234993
220.56	0.00403483	0.00257321
220.8	0.00402849	0.00230119
221.04	0.00384741	0.0018322
221.28	0.00407969	0.00179043
221.52	0.00380584	0.00213339
221.76	0.00401891	0.0028615
222	0.00399295	0.0021671
222.24	0.00448242	0.00225037
222.48	0.00367375	0.00194407
222.72	0.00409261	0.00259347
222.96	0.00416003	0.00236
223.2	0.00392743	0.00252528
223.44	0.0042804	0.001909
223.68	0.00365119	0.00233209
223.92	0.00437827	0.00229402
224.16	0.00358066	0.00233338
224.4	0.0043721	0.00202848
224.64	0.00432247	0.00240747
224.88	0.00367207	0.0023773
225.12	0.0033234	0.00178834
225.36	0.00406532	0.00240936
225.6	0.00398201	0.00247372
225.84	0.00409413	0.00180464
226.08	0.00449957	0.00168682
226.32	0.00419855	0.00228355
226.56	0.00378912	0.00185295
226.8	0.00472798	0.00229899
227.04	0.00368622	0.00198075
227.28	0.0035152	0.0019505
227.52	0.00383842	0.00250102
227.76	0.00396371	0.0018782
228	0.00385116	0.00186752
228.24	0.00335157	0.00207535
228.48	0.00406189	0.00223837
228.72	0.00460868	0.0021516
228.96	0.00410377	0.00157336
229.2	0.00414559	0.00196592
229.44	0.00339941	0.00189657
229.68	0.00382392	0.0014551
229.92	0.00348023	0.00182439
230.16	0.00310305	0.00152905
230.4	0.00358587	0.00228584
230.64	0.00348937	0.00217363
230.88	0.00393313	0.00181669
231.12	0.0036302	0.0021619
231.36	0.0038752	0.00154306
231.6	0.00365336	0.00159811
231.84	0.00411664	0.00190522
232.08	0.00369594	0.00224319
232.32	0.00365284	0.00105323
232.56	0.00298245	0.00209891
232.8	0.00381527	0.00238053
233.04	0.00404076	0.00135109
233.28	0.00286617	0.00164591
233.52	0.00389101	0.0020156
233.76	0.00406494	0.00244956
234	0.00392461	0.00216481
234.24	0.00278691	0.00167936
234.48	0.00306875	0.00145395
234.72	0.00354788	0.00185516
234.96	0.00390826	0.00151636
235.2	0.00369747	0.00219831
235.44	0.00381959	0.00140894
235.68	0.0036418	0.00196585
235.92	0.00342134	0.0023206
236.16	0.0036359	0.00241189
236.4	0.00381171	0.00190183
236.64	0.00389083	0.00193943
236.88	0.0038197	0.00199722
237.12	0.00375869	0.0024769
237.36	0.00264649	0.00129193
237.6	0.0035419	0.00182865
237.84	0.00318154	0.00192855
238.08	0.00327491	0.00125417
238.32	0.00361284	0.00171787
238.56	0.00343811	0.00157104
238.8	0.00392319	0.00154759
239.04	0.00355262	0.00199185
239.28	0.00306197	0.00229034
239.52	0.00299136	0.00139666
239.76	0.00411174	0.00209298
