# Supplementary material for: Complementary biosensors reveal different G-protein signaling modes triggered by GPCRs and non-receptor activators
Source: eLife. 2021 Mar 31;10:e65620. doi: 10.7554/eLife.65620 (PMC8034979; doi:10.7554/eLife.65620)
Supplement: Figure 3—figure supplement 1—source data 2. [file elife-65620-fig3-figsupp1-data2.xlsx]

## Sheet: Grb2 GBA
	WT		FA
Time	Exp1	Exp2	Exp1	Exp2
0	0.000150332	0.000208368	0.000282604	0.000250525
0.24	0.000189444	-1.90812e-05	0.000277302	8.75227e-05
0.48	-3.40573e-05	0.000156532	9.1665e-05	0.000138349
0.72	0.00039485	0.000159017	0.000356793	0.000209141
0.96	0.000161356	0.000213411	0.000248037	0.000177511
1.2	0.000105464	4.04098e-05	0.000218611	5.20693e-05
1.44	9.11223e-05	-4.30309e-05	0.000192866	0.000122286
1.68	-7.3635e-05	-4.01889e-05	-2.47215e-05	9.84186e-05
1.92	0.000206012	0.000209496	-0.000158107	0.000105483
2.16	3.90687e-05	0.000172674	0.000282862	0.000145641
2.4	0.000325091	3.02421e-05	8.27308e-05	6.7526e-05
2.64	7.29084e-05	6.0523e-05	0.000205929	2.95901e-05
2.88	0.000144901	1.3577e-05	0.000206764	-6.87078e-05
3.12	8.67651e-05	-4.87719e-05	4.22375e-05	0.000190951
3.36	8.87571e-05	-2.63402e-05	0.000188099	0.000120129
3.6	0.000136532	5.80137e-05	-6.66316e-05	0.000157153
3.84	0.000133027	1.61325e-05	0.000106378	9.73518e-05
4.08	-3.66444e-06	6.05402e-05	0.00022805	0.000143101
4.32	-4.40698e-05	-8.62337e-05	0.000236896	-1.05563e-05
4.56	4.9635e-05	-6.8591e-05	-7.29146e-05	7.54975e-05
4.8	0.000141901	2.97957e-05	0.000229664	0.000174003
5.04	1.22525e-05	9.50264e-05	3.06092e-05	0.000132797
5.28	0.000264399	6.01539e-05	0.000272272	0.000149887
5.52	-0.000138172	0.000183467	9.93961e-05	2.59566e-05
5.76	5.92493e-05	7.04671e-05	9.04433e-05	-4.64733e-05
6	0.000171438	1.39092e-05	-0.000110484	1.41163e-05
6.24	3.8731e-05	2.22214e-05	0.000111611	-3.09376e-05
6.48	2.95994e-05	0.000139656	-0.000149837	2.74624e-06
6.72	0.000204235	6.42151e-05	2.68799e-05	0.000205066
6.96	2.75895e-05	-0.000128838	2.12131e-05	0.000228702
7.2	0.000134053	-5.49433e-05	7.63596e-05	-0.000149455
7.44	0.000177839	6.57979e-05	0.000411753	6.63625e-05
7.68	4.18516e-05	6.87508e-05	3.8336e-05	9.93302e-05
7.92	-0.000194171	6.12924e-05	-3.96453e-05	-7.52022e-05
8.16	0.00020641	0.000191439	2.10455e-05	0.000153429
8.4	0.000162401	0.000151459	-0.000169817	0.000105612
8.64	6.7592e-05	2.53769e-05	-0.000170667	0.000209125
8.88	-0.000162964	0.000228032	0.000154447	-0.000140251
9.12	0.000208232	0.000129299	-1.37515e-05	0.000108681
9.36	3.21157e-05	-4.00733e-05	0.000304571	1.57419e-05
9.6	-4.83193e-05	0.0002103	0.000275818	0.00014443
9.84	-3.78012e-05	8.75039e-05	-0.000259226	0.000129122
10.08	3.34935e-05	7.88021e-05	-0.000172709	8.53856e-05
10.32	1.21819e-05	3.78217e-05	0.000125121	1.09375e-06
10.56	0.000215669	0.000139046	0.00012484	-8.6694e-05
10.8	0.000124427	-5.07631e-05	-1.26019e-05	-0.000110705
11.04	6.24392e-05	5.30049e-05	6.07248e-05	7.04089e-05
11.28	5.13224e-05	3.55597e-05	0.000231785	7.83493e-06
11.52	-0.000130612	6.13291e-05	2.68948e-06	9.62027e-05
11.76	2.08666e-05	-0.000158353	-0.000264867	-2.46278e-05
12	-0.000144893	-3.78891e-05	-0.000110283	0.000178187
12.24	-9.05087e-05	-7.30276e-05	0.000290378	-0.000176639
12.48	-7.05629e-06	0.000204999	-3.72762e-05	2.84111e-05
12.72	-5.84803e-05	7.92804e-05	0.000247737	3.359e-05
12.96	0.000359338	4.648e-05	-7.48257e-05	0.000112146
13.2	-6.02585e-05	-0.000112741	1.34112e-05	0.000167168
13.44	-0.000132679	-5.5349e-06	-3.45604e-05	1.7047e-05
13.68	7.331e-06	0.000106743	6.31884e-05	-0.000199438
13.92	-0.000234846	-0.000176809	-4.03583e-05	-8.30212e-05
14.16	0.000273361	0.000133663	-0.000145827	-9.17348e-05
14.4	9.11432e-05	-0.000142968	0.000102863	-0.000196164
14.64	-5.73165e-05	0.000131318	-3.83151e-05	0.000142164
14.88	-0.000132827	-5.46062e-05	0.000161694	7.11275e-05
15.12	0.000209722	-4.12805e-05	-5.35118e-05	6.26781e-06
15.36	-4.41344e-05	-0.000162761	-3.47415e-06	-0.000148232
15.6	-9.23336e-05	3.56513e-05	-0.000193824	8.62602e-05
15.84	-2.77603e-05	-5.54283e-05	0.000132003	5.74828e-05
16.08	-0.000181708	-9.47103e-05	0.000148708	0.000110707
16.32	-0.000264498	4.44857e-05	-0.000129546	8.34026e-05
16.56	6.40229e-05	-7.5718e-06	-2.77354e-05	0.000199575
16.8	-0.000142091	-7.96246e-05	0.000149572	7.32184e-05
17.04	-5.93064e-05	-0.000227434	2.6745e-05	3.31487e-05
17.28	0.000166965	9.53073e-06	-0.000432835	5.95283e-05
17.52	-9.59419e-05	-0.000119653	0.000170317	-9.86911e-05
17.76	-0.000170938	0.000211687	-0.00017465	2.39336e-05
18	-1.93307e-05	-7.08443e-05	0.00026265	-4.33517e-05
18.24	-6.93953e-05	-2.83866e-05	-0.000145867	4.26414e-05
18.48	-0.000156284	-8.96854e-06	-2.98181e-05	-6.90085e-05
18.72	-0.000113976	-0.000278499	-0.000199791	-0.000112175
18.96	9.90801e-05	-0.000205476	5.97008e-05	0.000128636
19.2	-0.000100367	-6.69411e-05	-3.93902e-05	2.30555e-05
19.44	-0.000109707	-2.82221e-05	2.7381e-05	-0.000136785
19.68	7.57368e-05	5.0526e-05	-1.38826e-05	-0.000322902
19.92	5.28919e-05	-0.000121709	5.7137e-05	-0.000171371
20.16	0.00010428	-1.16078e-05	-0.000184127	-0.000105314
20.4	-0.000318433	-2.35282e-05	-0.000275892	0.000180835
20.64	5.43735e-06	0.000113087	-0.000284427	-7.92024e-05
20.88	-0.000153305	7.75999e-06	7.33054e-05	-9.98713e-05
21.12	0.000104036	-0.000141975	3.12692e-05	-0.000181154
21.36	-6.81935e-06	-3.07028e-05	-0.000120681	-6.83789e-05
21.6	-0.000168026	4.21e-05	-0.000221096	6.23147e-05
21.84	-2.29151e-05	-5.28621e-05	-0.00013143	-1.79831e-05
22.08	2.27826e-05	9.70756e-05	2.5125e-05	-9.68127e-05
22.32	6.43629e-05	-0.000150849	6.82282e-05	-0.000242717
22.56	0.000255994	-0.000137949	-0.000103038	-0.000101192
22.8	0.000170948	-0.000129893	-0.000177879	-3.65905e-05
23.04	-0.000239749	-1.41907e-05	-0.000181854	0.000140804
23.28	-4.29347e-05	-5.98349e-05	-0.000161968	3.65581e-05
23.52	0.000209257	3.22944e-05	-8.60024e-05	-0.000211018
23.76	-0.000166674	-5.37948e-05	0.000298687	-2.37418e-06
24	-0.000166839	-5.16437e-05	-0.000220514	-0.00016508
24.24	-0.000178833	-6.83951e-05	6.02071e-05	8.58541e-05
24.48	-0.000292957	0.000181629	-6.13103e-05	-0.00011195
24.72	-0.000277511	-0.000280316	-7.20222e-05	-4.30406e-05
24.96	8.54941e-06	-0.000202904	-0.00015125	-6.77168e-06
25.2	-7.97412e-06	-6.06938e-05	-3.17094e-06	-6.46609e-05
25.44	-0.000204047	-1.67438e-05	-0.000110961	-0.000125651
25.68	-0.000152919	-1.22188e-05	-0.000141648	4.63464e-05
25.92	-1.88219e-05	-3.19554e-05	-0.000162037	-0.00023495
26.16	-0.000303676	-5.56349e-05	-0.000194509	-0.000137293
26.4	5.54087e-05	-0.000164805	-8.86177e-06	-0.000157237
26.64	-1.07836e-05	5.88596e-05	-0.000266261	-4.46317e-05
26.88	-0.000217449	-6.95132e-05	-0.00022881	-0.0002277
27.12	-0.000192844	7.23793e-05	-0.00010845	-0.000244325
27.36	-0.000106888	6.10019e-05	6.69505e-05	-9.85374e-05
27.6	-0.000175552	0.000110091	-0.000102449	-0.000107366
27.84	4.43435e-05	-8.50802e-05	-0.000122887	-0.00024761
28.08	-0.000232619	-0.000283355	0.000166159	2.73625e-05
28.32	-5.88276e-05	-4.54927e-06	-0.000122186	-4.30151e-05
28.56	-0.00021082	-3.08466e-05	-4.92458e-05	-0.000204781
28.8	-0.000113505	-1.03516e-05	-0.000137044	-9.29515e-05
29.04	0.000190591	1.98649e-05	6.20168e-05	-4.69444e-05
29.28	9.8552e-05	-1.32962e-05	-0.000186407	-0.000214203
29.52	-4.98803e-05	-0.000240328	-0.000473331	-0.000202875
29.76	-8.39836e-05	-9.70566e-05	-0.000259335	-9.47474e-05
30	-0.000259087	-0.000184444	-0.000421913	0.000184679
30.24	2.97253e-05	3.61996e-05	-7.15117e-06	0.000116742
30.48	0.000162421	0.000255247	2.20895e-05	0.000114797
30.72	-0.00870207	-0.00877056	-0.00782642	-0.00781577
30.96	0.0500161	0.0661207	0.027316	0.0233081
31.2	-0.049536	-0.0486976	-0.0468472	-0.0474884
31.44	0.110368	0.107497	0.106889	0.11198
31.68	0.0125713	0.0121604	0.0120486	0.0126061
31.92	-0.000222045	3.08219e-06	-0.000176748	-4.12064e-05
32.16	-0.000285727	-2.7582e-07	-0.00011245	2.46539e-05
32.4	1.2213e-05	-2.65871e-05	-9.67248e-05	-1.29015e-06
32.64	-2.58817e-05	4.72779e-05	-0.000285665	8.91386e-05
32.88	-0.000122724	-3.07642e-05	-0.000192592	5.87373e-05
33.12	-0.00021657	-3.16407e-05	-0.000174851	0.000219691
33.36	2.79724e-05	1.18474e-05	-0.000198968	-0.000300626
33.6	-4.48054e-05	4.16255e-05	-0.000111767	-0.000234451
33.84	-0.000127286	-2.33408e-05	-0.000126565	1.4794e-06
34.08	-0.000149689	-4.15746e-05	-2.51908e-05	4.17156e-05
34.32	0.000126757	2.69695e-05	-6.36014e-05	-0.000148072
34.56	4.04837e-05	-6.92177e-06	-0.000139628	-7.48403e-05
34.8	-0.000268228	-4.68143e-05	-0.000108706	0.000107252
35.04	-0.000125882	1.18965e-06	-0.000377746	-2.91625e-05
35.28	2.16874e-06	-0.000101898	-1.37156e-05	-0.000214547
35.52	-7.94232e-05	-5.81937e-05	-0.000236537	-4.25398e-05
35.76	-0.000406291	0.000106428	-9.61446e-05	-4.39105e-06
36	-9.26285e-05	-8.72555e-05	-0.000313869	-0.000261614
36.24	0.000239569	0.000150497	-0.000397027	-3.75459e-05
36.48	0.000202143	1.8234e-05	-0.00029317	-0.000181831
36.72	-0.000222169	8.80848e-05	9.85587e-06	-1.90633e-05
36.96	-0.000272874	0.000111239	-8.57874e-06	-0.000173339
37.2	9.69478e-05	7.11151e-05	-0.000224506	-6.20974e-05
37.44	-0.000224743	4.01145e-05	-0.000198631	1.11297e-05
37.68	-0.000282751	0.000120806	-0.000166859	-2.20991e-05
37.92	-1.63103e-05	-1.80949e-05	-0.000119486	-0.0001365
38.16	-3.66263e-06	-0.00011505	0.000114038	-0.000140244
38.4	-5.84602e-06	4.45633e-05	-0.00022702	-0.000166696
38.64	-6.3371e-05	8.09903e-06	-0.000237998	-0.000128449
38.88	-7.96184e-05	-9.75235e-05	-0.000309871	-0.000169746
39.12	-0.000100866	-8.27657e-05	-0.000328269	-0.000207866
39.36	-0.000272943	6.47334e-05	-1.34979e-05	-2.07959e-06
39.6	-0.00020301	5.12532e-05	-0.000300507	-6.90957e-05
39.84	3.47016e-05	-0.000168606	-0.000109778	-0.000259522
40.08	4.26503e-06	-9.49736e-06	-0.000334432	-0.000314063
40.32	-0.000116056	-7.60293e-05	-4.86627e-05	-0.000173158
40.56	0.000102144	-4.28321e-05	-4.91762e-05	-0.000109868
40.8	0.000198121	-5.78236e-05	-0.00021954	-0.000123017
41.04	-0.000133632	0.00016566	0.000118548	-0.000218473
41.28	-0.000336609	-6.79496e-05	-8.56691e-05	-0.000108764
41.52	-5.17236e-05	1.24049e-05	-3.29314e-05	-1.94729e-05
41.76	-0.000218125	4.86568e-05	-0.000222788	-6.11146e-06
42	-0.000135892	0.000161714	-0.000127933	-0.000205419
42.24	-0.000324476	-5.4138e-05	-0.000136127	-0.000138255
42.48	-0.00024862	-5.23324e-05	-0.000279159	0.000165996
42.72	-7.24722e-05	-0.000177087	-0.000544051	-0.000146032
42.96	-0.000184903	-1.131e-05	-0.000126809	1.84076e-05
43.2	-0.000277344	5.54863e-05	-6.58871e-05	-0.000190904
43.44	-0.000260916	1.96196e-05	-0.000237639	-1.88718e-05
43.68	-0.000231377	7.6604e-05	-0.000206746	-0.000156247
43.92	2.85068e-05	2.90969e-05	-0.000186431	-2.79871e-05
44.16	-0.000238895	-0.000110164	-0.000445602	-0.000198578
44.4	-3.92781e-05	-0.00022003	-0.000301761	-0.000314215
44.64	3.1497e-05	-0.000215132	-0.000158357	-8.01116e-05
44.88	-2.24028e-05	-0.000147314	-0.000291658	2.23757e-05
45.12	-0.000389559	3.40393e-05	-0.00015596	-0.000176071
45.36	-0.000344474	6.94443e-06	-0.000310459	5.33599e-05
45.6	-7.50341e-05	4.85859e-05	-0.000255674	-0.000227588
45.84	-0.000333083	3.51921e-05	-0.000515244	-0.000205785
46.08	-0.00018243	7.56439e-05	-7.77458e-05	-7.56299e-05
46.32	-5.35935e-05	-0.000164143	-6.77741e-05	-3.48768e-05
46.56	2.91692e-06	0.00019074	-0.000137794	-0.000105175
46.8	-0.000298072	-0.00010781	-0.000180958	-0.000249294
47.04	-0.000318224	-9.62468e-05	-0.000345134	-3.39629e-05
47.28	-7.17642e-05	1.29727e-05	-2.17741e-05	-0.000282649
47.52	-0.000168854	5.73884e-05	-0.000339916	-0.000264351
47.76	-0.000308513	-0.000171536	-0.000222512	-0.000112566
48	-0.000250384	-7.69194e-05	-0.00033312	7.9896e-05
48.24	-0.000359591	-6.67394e-05	-0.0002119	-0.000146039
48.48	-0.000360931	-4.14981e-05	-0.000198358	-0.000235488
48.72	-0.000268835	2.10668e-05	-4.29854e-05	-0.000209491
48.96	-0.00014358	-0.000244114	-0.000206722	-0.00021911
49.2	-0.000261376	-0.000141191	-0.000210551	-0.000388579
49.44	-0.000228085	-0.000104084	-0.000223591	-0.000276309
49.68	-0.000248771	-0.000233037	-0.000262386	-0.000122608
49.92	-0.000603647	-0.000263063	-0.000179917	-0.000145055
50.16	-0.000147493	-9.36986e-05	-0.000140712	-0.000263936
50.4	-0.000359286	-0.00024775	-0.000209271	-0.000123366
50.64	-0.000110385	5.66921e-05	-9.29105e-05	-0.000231397
50.88	-0.000157721	-2.45153e-05	-0.000156186	-4.31761e-05
51.12	-0.0003993	-0.000183735	-0.000111342	-0.000316402
51.36	-0.0002191	-0.000179274	-0.000405332	-0.000150996
51.6	-0.000554573	-6.19232e-05	-0.000260546	-9.48291e-05
51.84	-0.000276578	-2.39979e-05	-0.000485478	-0.000282518
52.08	-0.000336119	6.05636e-05	-0.000343809	7.83856e-06
52.32	-0.000164096	-0.000118731	-0.000391185	-0.000286226
52.56	-0.000302334	0.000175886	-0.000400199	-0.00025068
52.8	-0.000291138	-0.000187269	-8.83439e-05	-0.000310291
53.04	-0.00022133	-0.00012604	-0.000473128	-0.000350423
53.28	-7.73038e-05	-0.000148627	-0.000370879	-0.000385233
53.52	-0.000342218	-0.000173772	1.45049e-05	-0.000228954
53.76	-0.000161409	-3.9112e-05	-0.000192243	-0.000267327
54	-0.000224966	-9.09747e-05	-0.000641347	-0.000131064
54.24	-0.000229753	2.6117e-05	-0.000507955	-0.000317284
54.48	-4.19645e-06	-0.000216904	-0.000368613	-0.000210908
54.72	-4.48501e-05	-0.000176254	-0.000195603	-0.000514824
54.96	-0.000118248	-0.000121271	-0.000448824	-0.000178318
55.2	-0.000128946	-0.000207049	-0.000544235	-0.000187131
55.44	-0.000321577	-0.000175296	-0.000476092	-0.000205981
55.68	-0.000227843	-0.00023504	-0.000353557	1.53216e-05
55.92	-0.000411173	-0.000277344	6.51512e-05	-0.000228652
56.16	-0.000243296	-0.000140825	-0.000379525	-0.0003364
56.4	-0.000279196	-0.000222898	-0.00034975	-0.000371221
56.64	-0.000405706	-0.000153529	-0.000225041	-0.000354704
56.88	-0.00044042	-1.13631e-05	-0.000287403	-0.000240481
57.12	-0.000185441	-0.000126538	-0.000339875	-0.000197905
57.36	-0.000187805	-0.000187384	-0.000270196	-0.000343656
57.6	-0.000318983	-0.000161129	-0.000232231	-0.00055429
57.84	1.12364e-05	-5.30949e-05	-0.000408291	-0.000288645
58.08	-0.000356572	-0.000161201	-0.000165097	-0.000368269
58.32	-0.000360268	-0.000127809	-0.000364598	-0.000484238
58.56	-0.000297186	-0.000261381	-0.000432739	-0.000255426
58.8	-0.000404141	-0.000261675	-0.000152191	-0.000378992
59.04	-0.000403262	-0.000113378	-0.000143728	-0.000158427
59.28	-0.000157118	-0.00010667	-0.000262077	-0.000323353
59.52	-0.000407404	-0.000287569	-0.000331035	-0.000314851
59.76	-0.000271516	-0.000127182	-0.000493223	-0.000214805
60	-0.0002399	-1.54991e-05	-0.000414571	-0.000111466
60.24	-0.000365029	-0.000317163	-0.000319367	-0.000316998
60.48	-0.00029155	-0.000120591	-0.000313224	-0.00030105
60.72	-0.000524325	-0.000124026	-0.000526196	-0.00031993
60.96	-0.000620341	-0.000177717	-0.000242977	-0.000254672
61.2	-0.000286725	-0.000270316	-0.000405436	-0.000134353
61.44	-0.000526106	-9.45468e-05	-0.000226545	-0.000341375
61.68	-0.000485472	-0.000178203	-0.000429789	-0.000344473
61.92	-0.00045315	-0.00021301	-0.000495405	-0.000332049
62.16	-0.000301116	-0.000156836	-0.000393501	-0.00037522
62.4	-0.000403765	-0.0001459	-0.000624104	-0.000245074
62.64	-0.000228152	-0.000312218	-0.000337912	-0.000255124
62.88	-0.000486933	-0.000190674	-0.000426796	-0.000525079
63.12	-0.000167655	4.34384e-05	-0.00048119	-0.000188751
63.36	-0.000587656	-2.39846e-05	-0.000410031	-0.00047363
63.6	-0.000205516	-0.000277676	-0.000381811	-0.000344155
63.84	-0.000263343	-0.000267418	-0.000402695	-0.000177944
64.08	-0.000186287	7.57669e-05	-0.000170963	-0.000444997
64.32	-0.000226403	-4.20389e-05	-0.000208204	-9.16938e-05
64.56	-0.000427502	-0.000317034	-0.000487629	-0.000251763
64.8	-0.000216021	-0.000287652	-0.00025818	-0.000502166
65.04	-0.0004325	-0.000272788	-0.000543504	-0.000351921
65.28	-0.000257779	-3.39161e-05	-0.000336536	-0.000514962
65.52	-0.000773331	-0.000104836	-0.000464037	-0.000417927
65.76	-0.000308122	-0.000205368	-0.000330812	-0.000393667
66	-0.000634752	-4.59929e-05	-0.000660281	-0.000126033
66.24	-0.000512567	-0.000167351	-0.000376668	-0.000405444
66.48	-0.000370231	-0.000120164	-0.000524357	-0.000306275
66.72	-0.000259242	-0.000364049	-0.00042061	-0.000337342
66.96	-0.000455555	-0.000383683	-0.00021423	-0.00046165
67.2	-0.000294402	-0.0002412	-9.82469e-05	-0.000353827
67.44	-9.29443e-05	-0.000392672	-0.000685112	-0.000436328
67.68	-0.00017829	-0.00019652	-0.00048145	-0.000242206
67.92	-9.05335e-05	-9.44493e-05	-0.000345308	-0.000327695
68.16	-0.000299665	-0.00025873	-0.000265037	-0.000435621
68.4	-0.00053487	-0.000259485	-0.000483834	-0.000423203
68.64	-0.000125612	-0.000343376	-0.000338256	-0.000367282
68.88	-0.000486363	-0.000321248	-0.000429332	-0.000372136
69.12	-0.000262599	-0.00038998	-0.000303518	-0.000204597
69.36	-0.00032473	-4.92159e-05	-0.000674224	-0.000548974
69.6	-0.000427812	-0.000142399	-0.000526159	-0.000470644
69.84	-0.00058732	-0.000208504	-0.000470297	-0.000459512
70.08	-0.000483702	-0.000185181	-0.000479605	-0.000506767
70.32	-0.000180093	-0.000396925	-0.000550453	-0.000600635
70.56	-0.000318788	-0.000321966	-0.000494431	-0.000568567
70.8	-0.000524216	-0.000442496	-0.000311178	-0.000342521
71.04	-0.000453861	-0.000239902	-0.000658505	-0.000518226
71.28	-0.000626751	-0.000290894	-0.000453219	-0.000548303
71.52	-0.000426245	-0.000189232	-0.000427507	-0.000163813
71.76	-0.000579932	-0.000231915	-0.000474112	-0.000282411
72	-0.000543707	-0.000210098	-0.00042045	-4.32876e-05
72.24	-0.000551004	-0.000365941	-0.000387901	-0.000334188
72.48	-0.000496208	-0.000649269	-0.00061146	-0.00028236
72.72	-0.000380335	-0.000209314	-0.000606377	-0.000505679
72.96	-0.000441529	-0.000271556	-0.000571961	-0.000301995
73.2	-0.000453903	-0.000273163	-0.000589953	-0.000469812
73.44	-0.000480705	-0.000324516	-0.000371796	-0.00035706
73.68	-0.000352827	-0.000514595	-0.000445816	-0.000175557
73.92	-0.000473888	-0.000349228	-0.000500781	-0.000374136
74.16	-0.000540688	-0.000360975	-0.000523193	-0.000530703
74.4	-0.000421623	-0.000261975	-0.000430192	-0.000359015
74.64	-0.000521472	-0.000143668	-0.000477214	-0.000326579
74.88	-0.000598347	-0.000340831	-0.000688917	-0.00059338
75.12	-0.000286467	-0.000296548	-0.000636385	-0.000300413
75.36	-0.000648478	-0.000272858	-0.0004653	-0.000618099
75.6	-0.000517761	-0.000353412	-8.38155e-05	-0.000471716
75.84	-0.000462538	-0.000139688	-0.000593056	-0.000536117
76.08	-0.000600492	-0.000333073	-0.000432371	-0.000512724
76.32	-0.0006255	-0.00023953	-0.000557539	-0.000460846
76.56	-0.000510766	-0.000236082	-0.000502482	-0.000690368
76.8	-0.000680633	-0.000150693	-0.00056438	-0.000416709
77.04	-0.000773138	-0.000468497	-0.000845735	-0.00042379
77.28	-0.000826361	-0.000204285	-0.00046129	-0.000499794
77.52	-0.000648662	-0.000282751	-0.000391427	-0.000405789
77.76	-0.000598797	-0.000632118	-0.000647913	-0.000336415
78	-0.000254171	-0.000255195	-0.000535034	-0.000514034
78.24	-0.000688624	-0.000391097	-0.000336397	-0.000455712
78.48	-0.000716104	-0.000404529	-0.000655694	-0.000315631
78.72	-0.000543985	-0.000427644	-0.000530278	-0.000525906
78.96	-0.000310596	-0.000441907	-0.000294937	-0.000300394
79.2	-0.000577404	-0.000430986	-0.000476405	-0.000368131
79.44	-0.000586485	-0.000509829	-0.000514669	-0.000675324
79.68	-0.00058671	-0.000372903	-0.000408043	-0.000557166
79.92	-0.000672306	-0.000508409	-0.000581546	-0.000692101
80.16	-0.000547708	-0.00024743	-0.000617431	-0.000498702
80.4	-0.000732515	-0.000293784	-0.00063068	-0.000575874
80.64	-0.000442963	-0.000430756	-0.000674497	-0.000414722
80.88	-0.000440217	-0.000174872	-0.000498061	-0.000489884
81.12	-0.000535308	-0.000329143	-0.000516077	-0.00047931
81.36	-0.000681409	-0.000358649	-0.000639797	-0.000615342
81.6	-0.000802142	-0.000462538	-0.000661819	-0.000532345
81.84	-0.000550457	-0.00034221	-0.000624312	-0.000467349
82.08	-0.000611158	-0.000332278	-0.000548658	-0.00054596
82.32	-0.00068877	-0.000382009	-0.000589533	-0.000442102
82.56	-0.000606383	-0.000358846	-0.000632147	-0.000592274
82.8	-0.000623634	-0.00028618	-0.000590767	-0.000634171
83.04	-0.000562837	-0.000539709	-0.000692079	-0.000600503
83.28	-0.000642922	-0.000441019	-0.000505397	-0.000744538
83.52	-0.000473751	-0.000413998	-0.00054641	-0.000714626
83.76	-0.000568535	-0.000243474	-0.00070146	-0.000528926
84	-0.000537805	-0.00068002	-0.000552141	-0.000729667
84.24	-0.00038593	-0.000432698	-0.000756976	-0.00039629
84.48	-0.000584282	-0.000424047	-0.000372444	-0.000461074
84.72	-0.000640856	-0.000384373	-0.000539883	-0.000459989
84.96	-0.000598697	-0.000290219	-0.000370787	-0.000552793
85.2	-0.000750944	-0.000590937	-0.000727042	-0.000369548
85.44	-0.000647141	-0.000178063	-0.000667509	-0.000397948
85.68	-0.000417983	-0.000385598	-0.000866583	-0.000862365
85.92	-0.000684192	-0.00025965	-0.000700002	-0.000584513
86.16	-0.000607911	-0.00046198	-0.000364387	-0.000555867
86.4	-0.000568946	-0.000413256	-0.000475287	-0.000474642
86.64	-0.000855437	-0.000614191	-0.000488408	-0.00043913
86.88	-0.000463462	-0.000595547	-0.000478128	-0.000356396
87.12	-0.000533395	-0.000302991	-0.000446649	-0.000502916
87.36	-0.000815299	-0.000551313	-0.000845129	-0.000383259
87.6	-0.000548914	-0.000440092	-0.000723374	-0.000625589
87.84	-0.00056081	-0.000504099	-0.00070662	-0.000440411
88.08	-0.00062095	-0.000459473	-0.000500394	-0.00074079
88.32	-0.000781778	-0.000572612	-0.000515995	-0.00056306
88.56	-0.00048733	-0.000388782	-0.000698168	-0.000548027
88.8	-0.000642242	-0.000612105	-0.000679632	-0.000760637
89.04	-0.000621284	-0.000376565	-0.000773914	-0.000700932
89.28	-0.00077166	-0.000618738	-0.000506359	-0.000777293
89.52	-0.000540348	-0.000456883	-0.000606595	-0.000393408
89.76	-0.000678876	-0.000625428	-0.00083566	-0.000471346
90	-0.000530351	-0.000527801	-0.00067908	-0.000740312
90.24	-0.000759119	-0.000732366	-0.000919611	-0.000567189
90.48	-0.000845266	-0.000690025	-0.000996956	-0.000553851
90.72	-0.000625928	-0.000385476	-0.000644658	-0.000645932
90.96	-0.000521383	-0.000650854	-0.000497022	-0.00068629
91.2	-0.000567883	-0.000533732	-0.000791659	-0.000389792
91.44	-0.000511975	-0.000484052	-0.000669923	-0.000493233
91.68	-0.00071797	-0.000376331	-0.000512595	-0.000660115
91.92	-0.000888003	-0.000499521	-0.000658255	-0.000679887
92.16	-0.000579801	-0.000640497	-0.000620207	-0.000835771
92.4	-0.000821384	-0.000506689	-0.000730382	-0.000700917
92.64	-0.00077363	-0.00073979	-0.000698211	-0.000538097
92.88	-0.000694121	-0.000458085	-0.000830539	-0.000523029
93.12	-0.000619869	-0.000719652	-0.000678042	-0.000577511
93.36	-0.000771234	-0.000470052	-0.000698831	-0.000438274
93.6	-0.000622678	-0.000593099	-0.000592507	-0.000567591
93.84	-0.00065033	-0.000370653	-0.00078865	-0.000696074
94.08	-0.000706242	-0.000477417	-0.000576532	-0.000515786
94.32	-0.000904686	-0.000610801	-0.00051172	-0.000513709
94.56	-0.00109332	-0.000610949	-0.000870508	-0.000752628
94.8	-0.000691582	-0.000664513	-0.000535861	-0.000572766
95.04	-0.000773159	-0.000576877	-0.000934782	-0.000431355
95.28	-0.000716875	-0.000379067	-0.000726969	-0.00069031
95.52	-0.000930235	-0.000606152	-0.000784997	-0.000718058
95.76	-0.000569271	-0.000312043	-0.000934362	-0.000640118
96	-0.000800937	-0.000604535	-0.000580932	-0.000698869
96.24	-0.00074286	-0.000563004	-0.000878028	-0.000672107
96.48	-0.000642403	-0.000350205	-0.000949623	-0.000629879
96.72	-0.000826393	-0.000700745	-0.000799538	-0.000444236
96.96	-0.000874746	-0.000627845	-0.000635829	-0.000657419
97.2	-0.000786569	-0.00054831	-0.000705392	-0.000586209
97.44	-0.000794065	-0.000576095	-0.000943158	-0.000686385
97.68	-0.000980428	-0.000566143	-0.000652069	-0.000688775
97.92	-0.000801146	-0.000684221	-0.00105672	-0.000504718
98.16	-0.000662329	-0.000597376	-0.000871055	-0.000630574
98.4	-0.000768385	-0.000712484	-0.000930518	-0.000677796
98.64	-0.000561937	-0.0004836	-0.000879245	-0.000649556
98.88	-0.000860965	-0.000688704	-0.000790133	-0.000697742
99.12	-0.000746197	-0.000378244	-0.000691435	-0.000694703
99.36	-0.000694125	-0.000476238	-0.000471926	-0.000760185
99.6	-0.000949251	-0.000609537	-0.000723092	-0.000621424
99.84	-0.000731184	-0.000431145	-0.0011293	-0.000652735
100.08	-0.000787881	-0.000582558	-0.000969138	-0.000678632
100.32	-0.00065922	-0.000390718	-0.00100465	-0.000557364
100.56	-0.000934637	-0.000669168	-0.00066291	-0.000727942
100.8	-0.000563173	-0.000838101	-0.000780649	-0.000730749
101.04	-0.000691844	-0.000480201	-0.000827164	-0.000573912
101.28	-0.000947701	-0.000709245	-0.000491056	-0.000634987
101.52	-0.000759696	-0.000660097	-0.000851747	-0.000608424
101.76	-0.000834488	-0.000644495	-0.000816247	-0.000721948
102	-0.000718374	-0.000764815	-0.000672926	-0.00076438
102.24	-0.000968867	-0.000464048	-0.000798386	-0.000583954
102.48	-0.000785869	-0.000506457	-0.000968489	-0.0005322
102.72	-0.000888635	-0.000575165	-0.000939144	-0.000566715
102.96	-0.000811594	-0.000444488	-0.00074565	-0.000574656
103.2	-0.000788053	-0.000871693	-0.000837477	-0.000814894
103.44	-0.000664341	-0.000498344	-0.000926218	-0.000486563
103.68	-0.000704695	-0.000659805	-0.000958477	-0.000807259
103.92	-0.000878222	-0.000625295	-0.00102703	-0.000788861
104.16	-0.000756024	-0.000480431	-0.00114069	-0.00043678
104.4	-0.000654584	-0.000714334	-0.000802688	-0.000758788
104.64	-0.00114626	-0.0007055	-0.000861809	-0.000914171
104.88	-0.000747779	-0.000627675	-0.000893008	-0.00094556
105.12	-0.000742981	-0.000660583	-0.000643865	-0.000741262
105.36	-0.000887105	-0.000541447	-0.000965602	-0.000978698
105.6	-0.000965308	-0.000650898	-0.000694556	-0.000874214
105.84	-0.000758436	-0.000613338	-0.00124081	-0.000981663
106.08	-0.000872018	-0.000716732	-0.000916807	-0.000893277
106.32	-0.00097179	-0.000736851	-0.000854211	-0.00063283
106.56	-0.000801983	-0.000533911	-0.00097162	-0.000814923
106.8	-0.000837452	-0.000529167	-0.000993936	-0.000839299
107.04	-0.000757869	-0.000669381	-0.00100373	-0.000882474
107.28	-0.000789617	-0.000741485	-0.00124509	-0.000960541
107.52	-0.000825799	-0.000732184	-0.000791535	-0.000793347
107.76	-0.00103138	-0.000633227	-0.000929019	-0.000923092
108	-0.000519283	-0.000553575	-0.00101266	-0.000857943
108.24	-0.000606611	-0.000686951	-0.000885292	-0.000891282
108.48	-0.000708461	-0.000667343	-0.000837957	-0.000873494
108.72	-0.000812291	-0.000627228	-0.000838902	-0.000748628
108.96	-0.000548893	-0.000687983	-0.000765718	-0.000819089
109.2	-0.00103427	-0.0007065	-0.000505769	-0.000889611
109.44	-0.000599621	-0.000496577	-0.000885085	-0.000815445
109.68	-0.00111384	-0.000458627	-0.000909154	-0.000925695
109.92	-0.000678425	-0.000721217	-0.000804312	-0.0010127
110.16	-0.00108448	-0.00077038	-0.00123399	-0.000871883
110.4	-0.000695023	-0.000518104	-0.000811531	-0.000757921
110.64	-0.000912077	-0.000673443	-0.000448348	-0.0010521
110.88	-0.000725047	-0.000688553	-0.000906633	-0.000641694
111.12	-0.000523127	-0.00088883	-0.000975442	-0.000895727
111.36	-0.000645279	-0.000623146	-0.000745046	-0.000810203
111.6	-0.000984295	-0.000722416	-0.000882721	-0.000826767
111.84	-0.000609916	-0.000668852	-0.000515548	-0.000885498
112.08	-0.00105167	-0.000696241	-0.00090771	-0.000987906
112.32	-0.000870048	-0.000553884	-0.000813583	-0.000882937
112.56	-0.000951273	-0.000617572	-0.000745401	-0.000844929
112.8	-0.000845988	-0.000533631	-0.00127232	-0.000919317
113.04	-0.000893675	-0.000817562	-0.00073179	-0.000733359
113.28	-0.00106507	-0.000589103	-0.000818839	-0.000841391
113.52	-0.000744861	-0.00066377	-0.0012195	-0.000768816
113.76	-0.000741531	-0.000684515	-0.000957794	-0.000792642
114	-0.000929483	-0.000693521	-0.000709414	-0.000782524
114.24	-0.00110311	-0.000804066	-0.000934537	-0.000784508
114.48	-0.00111462	-0.0008431	-0.00113552	-0.00096408
114.72	-0.000915678	-0.000668417	-0.000930485	-0.000988709
114.96	-0.000830834	-0.00069145	-0.00073753	-0.000862214
115.2	-0.00084382	-0.000803112	-0.000645166	-0.00101688
115.44	-0.000891112	-0.000732977	-0.000754623	-0.000871882
115.68	-0.000970788	-0.000928674	-0.000931121	-0.000763915
115.92	-0.000863242	-0.000794641	-0.000827636	-0.000917011
116.16	-0.0010661	-0.000807682	-0.00113508	-0.000992753
116.4	-0.00102894	-0.000841796	-0.000821333	-0.000808991
116.64	-0.000639842	-0.000859126	-0.00090021	-0.000963759
116.88	-0.000613017	-0.000878614	-0.000795029	-0.000759532
117.12	-0.000908946	-0.000739212	-0.00100847	-0.000859192
117.36	-0.000986538	-0.000630107	-0.000844604	-0.00081336
117.6	-0.00106895	-0.000770161	-0.0009365	-0.000893956
117.84	-0.000880194	-0.000949965	-0.00081518	-0.000934192
118.08	-0.00104034	-0.000774784	-0.000800397	-0.000940874
118.32	-0.000841106	-0.000961107	-0.000665181	-0.00077814
118.56	-0.000927599	-0.000637441	-0.00104506	-0.000939894
118.8	-0.000797386	-0.000999786	-0.000989634	-0.000874644
119.04	-0.000889159	-0.000704854	-0.000832535	-0.0010202
119.28	-0.000999235	-0.000886346	-0.00104033	-0.000827988
119.52	-0.000913986	-0.000802799	-0.000650256	-0.00100945
119.76	-0.000992701	-0.000781103	-0.00100178	-0.000957817
120	-0.00100753	-0.000771005	-0.000698278	-0.00101472
120.24	-0.000889886	-0.000685089	-0.00110412	-0.000753111
120.48	-0.000924451	-0.000646877	-0.000762949	-0.00071857
120.72	-0.000803515	-0.000906271	-0.00105367	-0.000971855
120.96	-0.0010347	-0.000834327	-0.00116272	-0.0010235
121.2	-0.0008526	-0.000622551	-0.000868384	-0.000820546
121.44	-0.000836897	-0.000710632	-0.000900039	-0.000894019
121.68	-0.000799073	-0.000919991	-0.000955524	-0.000959814
121.92	-0.00138761	-0.000668934	-0.00110942	-0.00100423
122.16	-0.000917074	-0.00084606	-0.00115599	-0.000871101
122.4	-0.00106692	-0.000775486	-0.000943388	-0.00108287
122.64	-0.000800342	-0.00064517	-0.000893733	-0.000981328
122.88	-0.00101407	-0.000778248	-0.00100858	-0.00103917
123.12	-0.000936545	-0.000790247	-0.00074948	-0.000840363
123.36	-0.00098594	-0.00101167	-0.00109719	-0.000786188
123.6	-0.00107264	-0.000688945	-0.00104525	-0.0010082
123.84	-0.0013154	-0.000871635	-0.000992635	-0.000845696
124.08	-0.00117581	-0.000857349	-0.00102843	-0.000835211
124.32	-0.000882916	-0.000777954	-0.000933013	-0.000906798
124.56	-0.000987841	-0.000841314	-0.000972623	-0.00106427
124.8	-0.00089977	-0.000779473	-0.00114185	-0.00109678
125.04	-0.00102692	-0.00068612	-0.000928515	-0.000826915
125.28	-0.00132368	-0.000882996	-0.000797913	-0.000905201
125.52	-0.00104461	-0.000804822	-0.00108557	-0.00108894
125.76	-0.000917242	-0.00104135	-0.00112811	-0.000860995
126	-0.00106241	-0.000860017	-0.00088772	-0.00091181
126.24	-0.000895797	-0.00100142	-0.00112603	-0.000993984
126.48	-0.00106561	-0.000850652	-0.000954388	-0.000995544
126.72	-0.00103743	-0.000852768	-0.00109546	-0.000744238
126.96	-0.00109674	-0.000642078	-0.00107159	-0.000827417
127.2	-0.00103222	-0.000864206	-0.00125482	-0.00110067
127.44	-0.000997478	-0.000570737	-0.000697618	-0.00109932
127.68	-0.00113116	-0.000800064	-0.00117312	-0.000703953
127.92	-0.00111052	-0.00102814	-0.00092891	-0.00109073
128.16	-0.000833366	-0.000874031	-0.00100758	-0.00100861
128.4	-0.000945838	-0.000812002	-0.00101279	-0.00106159
128.64	-0.00101805	-0.000905577	-0.00101592	-0.000796664
128.88	-0.00102151	-0.000975346	-0.00107169	-0.000838798
129.12	-0.000951881	-0.000757287	-0.000968136	-0.00115891
129.36	-0.00108882	-0.00111597	-0.00102477	-0.000825605
129.6	-0.000867512	-0.00100792	-0.000972656	-0.000746327
129.84	-0.00107398	-0.000740868	-0.000820562	-0.000936312
130.08	-0.000793544	-0.000931427	-0.000854831	-0.00104223
130.32	-0.00146964	-0.000944592	-0.00107599	-0.000825469
130.56	-0.00136782	-0.000952164	-0.00110674	-0.000853811
130.8	-0.00119049	-0.000923722	-0.00106257	-0.000787186
131.04	-0.000745138	-0.000850793	-0.00109324	-0.000926105
131.28	-0.000965084	-0.00101408	-0.00100383	-0.00115741
131.52	-0.000816776	-0.000888628	-0.00116702	-0.000961838
131.76	-0.00106767	-0.000880726	-0.000993205	-0.000946395
132	-0.000885816	-0.00100302	-0.00111569	-0.0011481
132.24	-0.000999757	-0.000780238	-0.0013189	-0.00107707
132.48	-0.000887389	-0.0010449	-0.00104518	-0.00116772
132.72	-0.000997968	-0.00112425	-0.00127383	-0.00111269
132.96	-0.00101489	-0.00103187	-0.00111574	-0.00118172
133.2	-0.000979255	-0.000925745	-0.00084239	-0.00117023
133.44	-0.00100059	-0.000993131	-0.00116521	-0.000852975
133.68	-0.00102883	-0.00083775	-0.00109686	-0.0010041
133.92	-0.00121131	-0.00114368	-0.000930184	-0.000903568
134.16	-0.00112166	-0.00107865	-0.0013034	-0.00100386
134.4	-0.00106949	-0.00103251	-0.00114006	-0.000885311
134.64	-0.00111503	-0.000982034	-0.00107737	-0.00120035
134.88	-0.00116768	-0.000988114	-0.00107941	-0.00122136
135.12	-0.000846573	-0.000875663	-0.00087512	-0.00116921
135.36	-0.00129847	-0.00104604	-0.000969972	-0.00110786
135.6	-0.00105966	-0.0010845	-0.0011104	-0.00118502
135.84	-0.00101411	-0.000806989	-0.00102679	-0.000892175
136.08	-0.00108469	-0.000970181	-0.00116567	-0.00112846
136.32	-0.00120319	-0.000843199	-0.0010544	-0.00109113
136.56	-0.00115271	-0.00082872	-0.00101368	-0.00118593
136.8	-0.00115618	-0.000885656	-0.000930774	-0.00103158
137.04	-0.00123169	-0.000997443	-0.00110179	-0.00121386
137.28	-0.000737557	-0.000947052	-0.00106829	-0.000990524
137.52	-0.00119483	-0.000969012	-0.00112692	-0.00103206
137.76	-0.0011642	-0.000994114	-0.00106496	-0.00119189
138	-0.00113118	-0.00101909	-0.001144	-0.00110673
138.24	-0.00126621	-0.00112215	-0.00111462	-0.00121689
138.48	-0.000713249	-0.00112331	-0.00101532	-0.000981154
138.72	-0.00120312	-0.00104654	-0.00125008	-0.00119017
138.96	-0.000882995	-0.00088283	-0.00109831	-0.000764935
139.2	-0.00106123	-0.00090264	-0.00124708	-0.000990458
139.44	-0.00110016	-0.000952568	-0.000944127	-0.0011062
139.68	-0.0011464	-0.00101285	-0.00117906	-0.000987555
139.92	-0.00101245	-0.000892803	-0.00107736	-0.00118712
140.16	-0.00101448	-0.000968474	-0.00108208	-0.00122395
140.4	-0.00128682	-0.00100672	-0.00110576	-0.00119237
140.64	-0.00126661	-0.00117002	-0.00103178	-0.00108296
140.88	-0.00133547	-0.000801635	-0.000851719	-0.0011099
141.12	-0.00123934	-0.000821187	-0.00116707	-0.00108523
141.36	-0.0010527	-0.00081037	-0.000809434	-0.00116454
141.6	-0.00139149	-0.000996614	-0.00117392	-0.00109195
141.84	-0.00116303	-0.0010751	-0.00116686	-0.00111016
142.08	-0.000982699	-0.00106679	-0.000965912	-0.00104283
142.32	-0.00108009	-0.00112327	-0.00120475	-0.0009424
142.56	-0.00130502	-0.00103781	-0.000847245	-0.00103544
142.8	-0.00127419	-0.00112097	-0.000962051	-0.00130879
143.04	-0.000973366	-0.000933527	-0.00106078	-0.00107043
143.28	-0.00108773	-0.000965999	-0.00114751	-0.0010081
143.52	-0.00111422	-0.00102737	-0.00131606	-0.00118766
143.76	-0.00127522	-0.000988631	-0.00125625	-0.00108108
144	-0.00118196	-0.00105146	-0.00117486	-0.0013406
144.24	-0.00107015	-0.000944421	-0.00108239	-0.00137556
144.48	-0.00119457	-0.00108954	-0.00108884	-0.00129821
144.72	-0.00101215	-0.00090328	-0.00111806	-0.00117487
144.96	-0.00111402	-0.00119078	-0.00125015	-0.00115614
145.2	-0.00115254	-0.00083149	-0.0014035	-0.00117042
145.44	-0.00111863	-0.00125467	-0.000995974	-0.00098458
145.68	-0.00145892	-0.00113447	-0.0011906	-0.00125321
145.92	-0.00145463	-0.00113605	-0.00112162	-0.0012808
146.16	-0.00131632	-0.00109549	-0.00146723	-0.00140306
146.4	-0.00108358	-0.00107759	-0.000951805	-0.00127878
146.64	-0.00115591	-0.000915073	-0.00116456	-0.000976311
146.88	-0.00119008	-0.00124689	-0.00117865	-0.00106149
147.12	-0.00132137	-0.00113837	-0.00124025	-0.00132925
147.36	-0.00126339	-0.000967947	-0.000898655	-0.00124568
147.6	-0.00132157	-0.00112093	-0.00110156	-0.00127777
147.84	-0.00114525	-0.00124137	-0.00116605	-0.00114329
148.08	-0.00123561	-0.00114019	-0.000856833	-0.00102117
148.32	-0.00119321	-0.00106033	-0.00107199	-0.00114185
148.56	-0.00118012	-0.00115665	-0.00106054	-0.00108494
148.8	-0.00112993	-0.00111013	-0.000997149	-0.00139114
149.04	-0.000943138	-0.00105054	-0.00103846	-0.0011911
149.28	-0.00149657	-0.000919519	-0.00141786	-0.00124427
149.52	-0.00119393	-0.00105441	-0.00124412	-0.0011799
149.76	-0.00118395	-0.00111997	-0.00105969	-0.00122055
150	-0.00130732	-0.001092	-0.00128107	-0.00138941
150.24	-0.00120931	-0.00103576	-0.000957035	-0.00120241
150.48	-0.00140931	-0.0011443	-0.00143088	-0.0011865
150.72	-0.00127698	-0.00120763	-0.00140905	-0.00140945
150.96	-0.00128674	-0.00122928	-0.00129717	-0.00133311
151.2	-0.00132745	-0.000962243	-0.00113203	-0.00109367
151.44	-0.00109557	-0.00114976	-0.00136925	-0.00125568
151.68	-0.00132496	-0.00109343	-0.00124366	-0.0013292
151.92	-0.00109726	-0.00120512	-0.00132708	-0.00115387
152.16	-0.00139243	-0.00132651	-0.00130788	-0.000975053
152.4	-0.00109218	-0.00126186	-0.00100794	-0.00137298
152.64	-0.000976437	-0.001195	-0.00122914	-0.00149091
152.88	-0.00133223	-0.0011193	-0.0014104	-0.00149913
153.12	-0.00145151	-0.00115118	-0.000850951	-0.00142686
153.36	-0.0013165	-0.0010883	-0.00138259	-0.00127204
153.6	-0.000922145	-0.00119232	-0.00118587	-0.00131901
153.84	-0.000855001	-0.00119218	-0.00118323	-0.00120296
154.08	-0.00127962	-0.00122003	-0.00120333	-0.00122106
154.32	-0.00112865	-0.00111989	-0.00135804	-0.00125532
154.56	-0.0010502	-0.00135198	-0.00136728	-0.00136813
154.8	-0.000935575	-0.00118485	-0.00103819	-0.00134409
155.04	-0.00126756	-0.00102997	-0.00137566	-0.00133406
155.28	-0.00132703	-0.00132818	-0.00130645	-0.0011518
155.52	-0.00137133	-0.00145287	-0.00114943	-0.00117481
155.76	-0.00116359	-0.00125708	-0.00131601	-0.00138751
156	-0.00126899	-0.00106514	-0.00103554	-0.00100515
156.24	-0.00122537	-0.00125683	-0.00115849	-0.00131475
156.48	-0.00129538	-0.00116957	-0.00126214	-0.00130742
156.72	-0.00143119	-0.00119549	-0.00140278	-0.00126569
156.96	-0.00126504	-0.00119647	-0.00122981	-0.00154016
157.2	-0.00149773	-0.00117564	-0.00121003	-0.00146049
157.44	-0.00128867	-0.00124231	-0.00133147	-0.00140572
157.68	-0.00140563	-0.00130318	-0.00117535	-0.00141749
157.92	-0.00116857	-0.00119461	-0.00133026	-0.00139253
158.16	-0.00130001	-0.00112037	-0.00147542	-0.00152389
158.4	-0.00117156	-0.00137381	-0.00136936	-0.00121989
158.64	-0.00119199	-0.00104714	-0.00124305	-0.00142986
158.88	-0.0011655	-0.00111602	-0.00112667	-0.00157526
159.12	-0.00155906	-0.00138597	-0.00104303	-0.00140085
159.36	-0.00123861	-0.00127049	-0.00101206	-0.00134403
159.6	-0.00111101	-0.00120173	-0.001421	-0.00127389
159.84	-0.00143582	-0.00135648	-0.00126352	-0.00132029
160.08	-0.00108722	-0.00122102	-0.00117658	-0.00131322
160.32	-0.0012696	-0.00139728	-0.00134965	-0.00147163
160.56	-0.00122016	-0.00111185	-0.00131525	-0.00146016
160.8	-0.00144973	-0.00130091	-0.00148399	-0.0014874
161.04	-0.001516	-0.00128164	-0.00113933	-0.00153331
161.28	-0.0011109	-0.00128672	-0.00143013	-0.00149337
161.52	-0.00147085	-0.00104918	-0.00116571	-0.0014819
161.76	-0.00116133	-0.00117401	-0.00125401	-0.00117118
162	-0.00127566	-0.00129092	-0.00125326	-0.00133293
162.24	-0.0012775	-0.00123203	-0.00115285	-0.00140249
162.48	-0.00142337	-0.00106111	-0.00154743	-0.00126538
162.72	-0.00144963	-0.00120996	-0.00130941	-0.00138379
162.96	-0.0011459	-0.00134122	-0.00146108	-0.00142915
163.2	-0.00126532	-0.00131278	-0.00154496	-0.00121284
163.44	-0.00121301	-0.00124785	-0.00145446	-0.00128306
163.68	-0.00145195	-0.00135711	-0.00136413	-0.00147753
163.92	-0.00120669	-0.00132911	-0.00126218	-0.0012769
164.16	-0.00159856	-0.00135336	-0.00134666	-0.00130358
164.4	-0.00136702	-0.00122515	-0.00135197	-0.00142365
164.64	-0.00134856	-0.00120595	-0.00150925	-0.00144957
164.88	-0.00134085	-0.00127653	-0.00136777	-0.00127465
165.12	-0.00146885	-0.00136159	-0.0016443	-0.00149794
165.36	-0.00162664	-0.00147534	-0.00123954	-0.00133282
165.6	-0.00147638	-0.00136296	-0.00142186	-0.00142243
165.84	-0.00158497	-0.00140126	-0.00119981	-0.00134691
166.08	-0.00127385	-0.00129012	-0.00154573	-0.00134564
166.32	-0.00116535	-0.00143011	-0.00120779	-0.00131697
166.56	-0.00132423	-0.0013523	-0.001445	-0.00152613
166.8	-0.0015297	-0.00122828	-0.00123566	-0.00141893
167.04	-0.00133727	-0.00130054	-0.00146541	-0.00135731
167.28	-0.00123767	-0.00146983	-0.00138765	-0.00168581
167.52	-0.0014359	-0.00137143	-0.00117315	-0.00155756
167.76	-0.00131581	-0.00143533	-0.00148416	-0.00154104
168	-0.00128412	-0.00134965	-0.00158386	-0.00146359
168.24	-0.00126344	-0.00141233	-0.00129546	-0.00155604
168.48	-0.00140225	-0.00139443	-0.00144425	-0.00142506
168.72	-0.00138422	-0.00145845	-0.001411	-0.00158773
168.96	-0.00104745	-0.00125852	-0.00143306	-0.00140178
169.2	-0.0012678	-0.00121931	-0.00129159	-0.00153164
169.44	-0.00160295	-0.00143224	-0.00134403	-0.00149431
169.68	-0.00142995	-0.00127826	-0.00148564	-0.00147778
169.92	-0.00149945	-0.00126769	-0.0014672	-0.00145323
170.16	-0.0013636	-0.00148173	-0.00148475	-0.00165177
170.4	-0.00153737	-0.00115815	-0.00153686	-0.00144934
170.64	-0.00157661	-0.0013752	-0.00121576	-0.00168142
170.88	-0.00127242	-0.0014567	-0.00125503	-0.00140518
171.12	-0.00154905	-0.00142151	-0.00129882	-0.00164634
171.36	-0.00132438	-0.00124082	-0.00159025	-0.00161262
171.6	-0.00125432	-0.00153513	-0.00128559	-0.0014784
171.84	-0.00131109	-0.00148083	-0.00153465	-0.0015492
172.08	-0.00119288	-0.00133372	-0.00137556	-0.00157418
172.32	-0.00160928	-0.00148897	-0.00153903	-0.00134958
172.56	-0.00153209	-0.00136092	-0.00154432	-0.00135526
172.8	-0.00155532	-0.00156186	-0.0014005	-0.00145641
173.04	-0.00146125	-0.00148572	-0.00142142	-0.00136565
173.28	-0.00143324	-0.00147153	-0.00136291	-0.00172865
173.52	-0.00152792	-0.00140182	-0.00182389	-0.00165605
173.76	-0.00138567	-0.00150001	-0.00140645	-0.00180262
174	-0.00152212	-0.0013064	-0.00126492	-0.00148386
174.24	-0.00153657	-0.00137166	-0.00153119	-0.0016492
174.48	-0.00134959	-0.00148404	-0.00151234	-0.00155679
174.72	-0.0011683	-0.00148177	-0.0012506	-0.00147656
174.96	-0.00142192	-0.00148595	-0.0012759	-0.00160853
175.2	-0.00137297	-0.00153406	-0.0014213	-0.00162498
175.44	-0.00138125	-0.00141583	-0.00144826	-0.00168195
175.68	-0.00165576	-0.00125497	-0.00150224	-0.00149452
175.92	-0.00127811	-0.00133855	-0.00130639	-0.00140115
176.16	-0.00151125	-0.0015869	-0.00153001	-0.00156756
176.4	-0.00175775	-0.00153221	-0.00154477	-0.00162402
176.64	-0.00147946	-0.00133964	-0.0015996	-0.00121618
176.88	-0.0014349	-0.00128348	-0.0015679	-0.00146462
177.12	-0.00147042	-0.00136867	-0.00139887	-0.00159373
177.36	-0.00152806	-0.0013159	-0.00152439	-0.00153368
177.6	-0.00163743	-0.00137853	-0.00161412	-0.00153798
177.84	-0.00172059	-0.00140894	-0.00169445	-0.00157813
178.08	-0.00144717	-0.00158592	-0.00142849	-0.00164471
178.32	-0.00176206	-0.00128198	-0.00156752	-0.00148154
178.56	-0.00147299	-0.00146997	-0.00138788	-0.0015197
178.8	-0.00154539	-0.00159074	-0.00155155	-0.00164101
179.04	-0.00134227	-0.00147082	-0.00156245	-0.00149997
179.28	-0.00171367	-0.00154752	-0.00162239	-0.00157265
179.52	-0.0015732	-0.00155636	-0.00156013	-0.00151095
179.76	-0.00165998	-0.00142925	-0.00128548	-0.00169865
180	-0.00153592	-0.00159189	-0.00133064	-0.00146126
180.24	-0.00143616	-0.00139941	-0.00176068	-0.00165335
180.48	-0.00148904	-0.00149497	-0.00169962	-0.00170134
180.72	-0.00158447	-0.00140313	-0.00135289	-0.00180259
180.96	-0.00140989	-0.00140983	-0.00132321	-0.00136621
181.2	-0.00134064	-0.00161341	-0.00120552	-0.00135287
181.44	-0.00137737	-0.00146631	-0.0016207	-0.00163923
181.68	-0.00141569	-0.00160862	-0.00138833	-0.00176681
181.92	-0.00136885	-0.00141907	-0.00187287	-0.00171091
182.16	-0.00133862	-0.00127897	-0.00156635	-0.00162192
182.4	-0.00151357	-0.00153567	-0.00153082	-0.00165095
182.64	-0.00167165	-0.00138925	-0.00140753	-0.00183482
182.88	-0.00124336	-0.00135325	-0.00161758	-0.00152077
183.12	-0.0014487	-0.00156853	-0.00138772	-0.00188569
183.36	-0.0017665	-0.00146864	-0.0017358	-0.00172077
183.6	-0.00149634	-0.00156966	-0.00138278	-0.00172787
183.84	-0.0015028	-0.00165403	-0.00154861	-0.00181451
184.08	-0.00135368	-0.00158528	-0.00135831	-0.00152026
184.32	-0.00147844	-0.0014733	-0.00163042	-0.00166164
184.56	-0.0017813	-0.00172552	-0.00166084	-0.00147155
184.8	-0.00161516	-0.00169894	-0.00158347	-0.00182916
185.04	-0.00154862	-0.00159992	-0.00164238	-0.00173167
185.28	-0.00169039	-0.00135545	-0.00151326	-0.0015748
185.52	-0.00129247	-0.0014799	-0.00163361	-0.00180463
185.76	-0.00137388	-0.00147085	-0.00152812	-0.00166798
186	-0.00178653	-0.00175522	-0.0013031	-0.00172836
186.24	-0.00152528	-0.00163512	-0.00184945	-0.00155058
186.48	-0.00188803	-0.00153247	-0.00132432	-0.00163321
186.72	-0.00159451	-0.00159937	-0.00184435	-0.00183792
186.96	-0.00149549	-0.00152962	-0.00181919	-0.00181005
187.2	-0.00151047	-0.00146419	-0.001462	-0.00154755
187.44	-0.00129533	-0.00142775	-0.00164332	-0.00169716
187.68	-0.0016969	-0.00161353	-0.00148014	-0.00176351
187.92	-0.00154945	-0.00128913	-0.00146636	-0.00180791
188.16	-0.00163053	-0.00172713	-0.00182535	-0.00182686
188.4	-0.00167973	-0.00162695	-0.00161313	-0.00168775
188.64	-0.00171334	-0.00169593	-0.00160729	-0.00167707
188.88	-0.00172343	-0.00165674	-0.00149036	-0.00172354
189.12	-0.00161962	-0.00171158	-0.00151316	-0.00162657
189.36	-0.00138546	-0.0014909	-0.0015368	-0.00170331
189.6	-0.00152672	-0.00156429	-0.00173808	-0.00167201
189.84	-0.00176454	-0.00142956	-0.0014983	-0.00173707
190.08	-0.00179668	-0.00159328	-0.00163254	-0.00154057
190.32	-0.00151072	-0.0016005	-0.00133099	-0.00178147
190.56	-0.00151493	-0.00150969	-0.00170766	-0.00184443
190.8	-0.00164961	-0.00158714	-0.00151702	-0.00158315
191.04	-0.00135302	-0.0016848	-0.0014834	-0.00144806
191.28	-0.00129268	-0.00182004	-0.001348	-0.0017909
191.52	-0.00134844	-0.00147184	-0.00148499	-0.00157465
191.76	-0.00152735	-0.00159443	-0.0016302	-0.00189944
192	-0.00171454	-0.0015587	-0.00151328	-0.00173134
192.24	-0.00174048	-0.00139577	-0.00147106	-0.00165416
192.48	-0.00161484	-0.00144743	-0.00165189	-0.00179425
192.72	-0.00140356	-0.00164878	-0.00190256	-0.00152226
192.96	-0.00191464	-0.00178071	-0.00163161	-0.00182357
193.2	-0.00166461	-0.00143841	-0.00143457	-0.00175662
193.44	-0.00151896	-0.00171535	-0.00160808	-0.00159316
193.68	-0.00167778	-0.00148703	-0.00165189	-0.00195759
193.92	-0.00143319	-0.00169874	-0.00171891	-0.00196431
194.16	-0.00154706	-0.00148223	-0.00149918	-0.00172312
194.4	-0.0016539	-0.00180448	-0.00160493	-0.00165113
194.64	-0.00156613	-0.00179579	-0.00150164	-0.00196028
194.88	-0.00149906	-0.0015858	-0.00147163	-0.00188529
195.12	-0.00162045	-0.00179777	-0.00142895	-0.0017165
195.36	-0.00153719	-0.00181569	-0.00159601	-0.00184087
195.6	-0.00161815	-0.00168234	-0.00161997	-0.00195571
195.84	-0.00158427	-0.0017158	-0.00138751	-0.0019031
196.08	-0.00150615	-0.00160494	-0.0017883	-0.0017759
196.32	-0.00140149	-0.00168626	-0.00173844	-0.00181393
196.56	-0.00187221	-0.00151905	-0.00161049	-0.00147855
196.8	-0.00185655	-0.00165877	-0.00173044	-0.0018238
197.04	-0.00165514	-0.0014749	-0.00143122	-0.00178112
197.28	-0.00160838	-0.00163049	-0.00164339	-0.00159714
197.52	-0.00145729	-0.00163997	-0.00164943	-0.00186407
197.76	-0.00182825	-0.00172277	-0.00141399	-0.00200834
198	-0.00166691	-0.00175506	-0.00176661	-0.00178388
198.24	-0.00179729	-0.00157663	-0.00146976	-0.00175487
198.48	-0.00157426	-0.00164245	-0.00151826	-0.00190482
198.72	-0.00185471	-0.00168596	-0.00152176	-0.00171267
198.96	-0.00164629	-0.00171954	-0.00187112	-0.00162169
199.2	-0.00144018	-0.00170097	-0.00161164	-0.00203055
199.44	-0.00157911	-0.00178726	-0.00182438	-0.00184055
199.68	-0.00164551	-0.00156837	-0.00182004	-0.001829
199.92	-0.00157439	-0.00174861	-0.00147366	-0.0017194
200.16	-0.00143214	-0.0016304	-0.00170903	-0.0018887
200.4	-0.00161948	-0.00151123	-0.00156101	-0.00180903
200.64	-0.00182645	-0.0015235	-0.00182151	-0.00184776
200.88	-0.0018023	-0.00184049	-0.00168682	-0.00172771
201.12	-0.0017575	-0.00176659	-0.0017312	-0.00189946
201.36	-0.00164178	-0.0017145	-0.00165368	-0.00181289
201.6	-0.00159649	-0.00166684	-0.00160906	-0.00192293
201.84	-0.00136509	-0.00168245	-0.00183537	-0.00158729
202.08	-0.00167351	-0.00170771	-0.00176972	-0.00178734
202.32	-0.00178421	-0.00174671	-0.00131166	-0.00176884
202.56	-0.00147432	-0.0016922	-0.00185547	-0.00218044
202.8	-0.00168422	-0.00156981	-0.00159275	-0.00179628
203.04	-0.0016254	-0.0015571	-0.00161203	-0.0019655
203.28	-0.00176109	-0.00164471	-0.00183823	-0.0019117
203.52	-0.00142218	-0.00167945	-0.00156886	-0.00180589
203.76	-0.00160617	-0.00163089	-0.00169021	-0.0017436
204	-0.00158226	-0.00165374	-0.00169422	-0.00197501
204.24	-0.00164108	-0.00178327	-0.0015934	-0.00176604
204.48	-0.00175364	-0.00188152	-0.00181648	-0.00179365
204.72	-0.00172778	-0.00172096	-0.00139226	-0.00196538
204.96	-0.00129026	-0.00181965	-0.00205916	-0.00184453
205.2	-0.00149929	-0.00165316	-0.00148942	-0.00189072
205.44	-0.00166525	-0.00189206	-0.00163204	-0.00183527
205.68	-0.0019292	-0.00183766	-0.00166982	-0.00178774
205.92	-0.00156561	-0.00161592	-0.00161281	-0.00172934
206.16	-0.00178991	-0.00162868	-0.00183141	-0.00163991
206.4	-0.00160522	-0.00176398	-0.00165155	-0.0019189
206.64	-0.0017918	-0.00181447	-0.00165646	-0.00195957
206.88	-0.00178061	-0.00175294	-0.00180487	-0.00186375
207.12	-0.00191622	-0.0018467	-0.00176347	-0.00187711
207.36	-0.00205217	-0.00179433	-0.0018747	-0.00182606
207.6	-0.00177205	-0.00160066	-0.00168808	-0.00184127
207.84	-0.00200272	-0.00169333	-0.00173485	-0.00181487
208.08	-0.0016593	-0.00169369	-0.00175916	-0.00176379
208.32	-0.00188268	-0.00155539	-0.00178203	-0.0020832
208.56	-0.0019628	-0.00206974	-0.0018335	-0.00218588
208.8	-0.00174871	-0.00182789	-0.00162809	-0.00185491
209.04	-0.00162383	-0.00183268	-0.00179529	-0.00211628
209.28	-0.00188903	-0.00159666	-0.00182281	-0.00190166
209.52	-0.00162456	-0.00163517	-0.00183312	-0.00175944
209.76	-0.00158093	-0.00185209	-0.00153916	-0.00212165
210	-0.00180446	-0.00178388	-0.00206288	-0.00194887
210.24	-0.00155426	-0.00190636	-0.00183041	-0.00194363
210.48	-0.00172246	-0.00184717	-0.00172939	-0.0017963
210.72	-0.00170042	-0.00178615	-0.00157007	-0.00190232
210.96	-0.00187092	-0.00195714	-0.00174078	-0.00195348
211.2	-0.00196861	-0.00179267	-0.00184674	-0.00208983
211.44	-0.00191482	-0.00173266	-0.00171261	-0.00187613
211.68	-0.00152155	-0.00193293	-0.00180164	-0.00184151
211.92	-0.0018486	-0.00181485	-0.00160397	-0.00183603
212.16	-0.00175165	-0.00176636	-0.0015783	-0.0020479
212.4	-0.00187197	-0.00198017	-0.00186109	-0.00164708
212.64	-0.00182555	-0.00177939	-0.00153786	-0.00180448
212.88	-0.00185731	-0.00186668	-0.00158664	-0.00202566
213.12	-0.00185311	-0.00178902	-0.00174865	-0.00195012
213.36	-0.00182191	-0.00180246	-0.00158767	-0.00181588
213.6	-0.00175677	-0.00200756	-0.0017023	-0.00172127
213.84	-0.00195287	-0.0018938	-0.00155414	-0.00210652
214.08	-0.0017717	-0.00194573	-0.00209048	-0.00185548
214.32	-0.00167907	-0.00196754	-0.00190139	-0.00181227
214.56	-0.00186253	-0.00173021	-0.00198695	-0.0019684
214.8	-0.00199184	-0.00166134	-0.00182481	-0.00207717
215.04	-0.00178389	-0.00168812	-0.00204604	-0.00202887
215.28	-0.0017855	-0.0017933	-0.00179172	-0.00215617
215.52	-0.00127411	-0.00184727	-0.00167738	-0.00205112
215.76	-0.00195354	-0.00208303	-0.00186883	-0.00201836
216	-0.0018274	-0.00212045	-0.00175902	-0.00217224
216.24	-0.00184104	-0.00200269	-0.00180427	-0.00215164
216.48	-0.00205437	-0.00199015	-0.00173456	-0.00194338
216.72	-0.00190749	-0.00208792	-0.00196718	-0.00192687
216.96	-0.00188287	-0.00197782	-0.0017212	-0.00199526
217.2	-0.0021108	-0.00172675	-0.00180151	-0.00211654
217.44	-0.00188452	-0.00192045	-0.00183367	-0.00205517
217.68	-0.00186219	-0.00190925	-0.00178752	-0.00203111
217.92	-0.00193021	-0.0019814	-0.00199342	-0.00179071
218.16	-0.00195809	-0.00184028	-0.00187098	-0.00202309
218.4	-0.00172751	-0.00169475	-0.00174864	-0.00179611
218.64	-0.00188553	-0.00186127	-0.00175269	-0.00203469
218.88	-0.00185741	-0.00196895	-0.00208636	-0.00206293
219.12	-0.0016979	-0.00207598	-0.00177621	-0.00212129
219.36	-0.00169556	-0.00193198	-0.00187122	-0.00221155
219.6	-0.0020335	-0.00205172	-0.0016469	-0.00199814
219.84	-0.00183236	-0.00203287	-0.00182302	-0.00186418
220.08	-0.0019207	-0.0018979	-0.00209735	-0.00200789
220.32	-0.00186322	-0.0018204	-0.0019155	-0.00211163
220.56	-0.00184199	-0.00190021	-0.00198637	-0.00184091
220.8	-0.00173629	-0.00182949	-0.00180185	-0.00204975
221.04	-0.00209559	-0.001973	-0.00178546	-0.00203742
221.28	-0.00192316	-0.00200803	-0.001649	-0.00203717
221.52	-0.0019756	-0.00218347	-0.00178617	-0.00196526
221.76	-0.00177836	-0.00179296	-0.00185349	-0.00214021
222	-0.00168578	-0.00201249	-0.00189511	-0.00192268
222.24	-0.00185112	-0.00194736	-0.00172375	-0.0019835
222.48	-0.00210642	-0.00196322	-0.0017354	-0.00174811
222.72	-0.00189906	-0.00189734	-0.00174933	-0.00229974
222.96	-0.00177481	-0.00193674	-0.00171243	-0.00198798
223.2	-0.00184065	-0.00201366	-0.00181584	-0.00208861
223.44	-0.00187673	-0.00201809	-0.00166389	-0.00194598
223.68	-0.00186842	-0.0017298	-0.00180527	-0.00200035
223.92	-0.00191083	-0.00221091	-0.0017952	-0.00191519
224.16	-0.00214461	-0.00184902	-0.00173444	-0.00224559
224.4	-0.00184272	-0.00195743	-0.00183717	-0.00226288
224.64	-0.00167594	-0.00181114	-0.00182921	-0.00218812
224.88	-0.00203379	-0.00190103	-0.00177016	-0.00215239
225.12	-0.00190807	-0.00183772	-0.0019866	-0.00210385
225.36	-0.0022588	-0.00209182	-0.00185202	-0.00231693
225.6	-0.00181859	-0.00204753	-0.00167046	-0.00213481
225.84	-0.00205039	-0.0020488	-0.00175822	-0.00198254
226.08	-0.00205797	-0.00176814	-0.00205298	-0.00221352
226.32	-0.00192064	-0.00193497	-0.00189714	-0.00207157
226.56	-0.00182398	-0.00190812	-0.00189002	-0.0020547
226.8	-0.00179014	-0.00212455	-0.00190387	-0.00211974
227.04	-0.00205229	-0.00192165	-0.00179989	-0.00242955
227.28	-0.00208623	-0.00207031	-0.00194717	-0.00211136
227.52	-0.0018389	-0.00200437	-0.00206965	-0.00233132
227.76	-0.00176284	-0.00186761	-0.00183748	-0.00220698
228	-0.00177346	-0.00193443	-0.00190337	-0.00192199
228.24	-0.0020497	-0.00212825	-0.00212764	-0.00189619
228.48	-0.00193662	-0.0021572	-0.00187633	-0.00212922
228.72	-0.00169006	-0.00198239	-0.00164164	-0.00215662
228.96	-0.0017908	-0.00193173	-0.00181568	-0.00216548
229.2	-0.00162287	-0.00197593	-0.00191319	-0.00211774
229.44	-0.00198969	-0.00205465	-0.00160896	-0.00236913
229.68	-0.00206369	-0.0019371	-0.00180743	-0.00232394
229.92	-0.00201728	-0.00218088	-0.00203503	-0.00204695
230.16	-0.00193384	-0.0019642	-0.00178799	-0.00199212
230.4	-0.00211368	-0.00214421	-0.00181116	-0.00233356
230.64	-0.00183362	-0.00212393	-0.00183879	-0.00196823
230.88	-0.00191817	-0.00193156	-0.0018124	-0.00232792
231.12	-0.00200242	-0.00177439	-0.00173904	-0.00225305
231.36	-0.00178948	-0.00221716	-0.00194712	-0.00217828
231.6	-0.00187952	-0.00203631	-0.00196973	-0.00225958
231.84	-0.00177342	-0.00212081	-0.00207491	-0.0021759
232.08	-0.00191195	-0.00200208	-0.00174512	-0.00225921
232.32	-0.00200919	-0.00195307	-0.00187227	-0.00222593
232.56	-0.00202048	-0.00212559	-0.00208894	-0.00226189
232.8	-0.00174405	-0.00205901	-0.00218098	-0.00231836
233.04	-0.001835	-0.00209297	-0.00197706	-0.0024359
233.28	-0.00201912	-0.00200174	-0.00178226	-0.00232908
233.52	-0.00221727	-0.00207201	-0.00209402	-0.00224827
233.76	-0.00161623	-0.00212402	-0.0020826	-0.00231163
234	-0.00189496	-0.00189341	-0.0019223	-0.00216375
234.24	-0.0020713	-0.00232125	-0.00192811	-0.00254876
234.48	-0.0018061	-0.00207355	-0.00207363	-0.00229478
234.72	-0.00197698	-0.00220239	-0.00199305	-0.00194041
234.96	-0.00208893	-0.00201972	-0.002132	-0.0022069
235.2	-0.00190727	-0.00221192	-0.0016941	-0.00218567
235.44	-0.00185122	-0.00206129	-0.00197279	-0.00215261
235.68	-0.00216836	-0.00202468	-0.00174267	-0.00238514
235.92	-0.00231225	-0.00215758	-0.00180308	-0.00223076
236.16	-0.00199463	-0.00212685	-0.00216613	-0.00214498
236.4	-0.00207726	-0.00194894	-0.00193954	-0.00222809
236.64	-0.00207044	-0.00202936	-0.0017346	-0.00211338
236.88	-0.0020218	-0.00205426	-0.00208725	-0.00259484
237.12	-0.00205506	-0.00229029	-0.00209024	-0.00213701
237.36	-0.00220337	-0.00205922	-0.00203087	-0.00224635
237.6	-0.0018083	-0.00216902	-0.00209156	-0.00253498
237.84	-0.00168965	-0.00223824	-0.0021503	-0.0021489
238.08	-0.00196717	-0.00220826	-0.00215054	-0.00222345
238.32	-0.0018865	-0.00198798	-0.00188656	-0.00233842
238.56	-0.00190141	-0.00206256	-0.00206049	-0.00219028
238.8	-0.00156102	-0.00225457	-0.00206069	-0.00245904
239.04	-0.00231068	-0.00212057	-0.00197615	-0.00217217
239.28	-0.00186966	-0.00205996	-0.00202062	-0.00215416
239.52	-0.00174497	-0.00212654	-0.00181376	-0.00248093
239.76	-0.00197787	-0.00203897	-0.00223428	-0.00229539

## Sheet: Control
Time	Exp1	Exp2
0	0.000156	0.00016
0.24	0.000204	0.000219
0.48	0.000226	5.19e-05
0.72	0.000107	1.85e-05
0.96	2.58e-05	6.65e-06
1.2	0.000277	-4.7e-07
1.44	8.97e-05	0.00024
1.68	0.000343	9.81e-05
1.92	7.94e-05	-0.00024
2.16	0.000278	-2.4e-05
2.4	5.08e-05	0.000246
2.64	0.000111	0.000265
2.88	0.000168	5.68e-05
3.12	5.9e-05	0.000216
3.36	4.11e-05	9.65e-05
3.6	0.000283	0.00011
3.84	0.000139	0.000227
4.08	-0.00011	-0.00012
4.32	7.76e-05	6.86e-05
4.56	2.76e-05	9.29e-05
4.8	0.000165	9.93e-05
5.04	0.000112	-0.00013
5.28	-5.5e-06	0.000124
5.52	-8.7e-05	0.000154
5.76	5.48e-05	0.000163
6	0.000179	1.61e-05
6.24	7.71e-05	-5.5e-05
6.48	-2e-05	2.57e-05
6.72	-0.00017	0.000115
6.96	-3.8e-05	0.000237
7.2	0.000109	-6.5e-05
7.44	2.58e-05	0.000111
7.68	8.96e-05	4.15e-05
7.92	-0.00012	0.00023
8.16	0.000251	8.48e-05
8.4	-1.4e-05	4.14e-05
8.64	-2.9e-05	2.45e-05
8.88	0.000111	-3.7e-05
9.12	0.000187	5.57e-05
9.36	0.000196	-2.4e-05
9.6	0.000167	0.00017
9.84	9.33e-05	7.72e-05
10.08	-7.9e-05	-7.1e-05
10.32	-0.0001	7.1e-06
10.56	6.12e-05	-0.00016
10.8	0.000108	0.000118
11.04	-0.0001	0.000146
11.28	0.000149	0.000169
11.52	4.36e-05	0.000116
11.76	-5.6e-05	0.00013
12	8.63e-05	-1.6e-05
12.24	0.000198	0.000291
12.48	-0.00017	-4e-05
12.72	-6.4e-06	0.000192
12.96	-0.00015	-0.00018
13.2	-9e-05	0.000109
13.44	9.99e-05	3.73e-06
13.68	-7.1e-05	0.000314
13.92	-0.00016	9.69e-07
14.16	-9.7e-06	-3.3e-05
14.4	1.01e-05	0.000136
14.64	2.38e-05	-5.8e-05
14.88	5.44e-05	0.000117
15.12	-0.00015	8.62e-05
15.36	-6.7e-05	-0.00011
15.6	1.76e-07	-3.7e-05
15.84	-4.7e-06	9.59e-05
16.08	3.65e-05	0.000137
16.32	-2.3e-05	-0.00011
16.56	-0.00013	3.08e-05
16.8	-5.3e-05	-9e-05
17.04	3.54e-05	4.2e-06
17.28	-9.9e-05	5.39e-05
17.52	-3.5e-05	-5.1e-05
17.76	0.000103	0.000117
18	-0.00016	8.2e-05
18.24	-0.00018	-6.9e-05
18.48	0.000183	-6.2e-05
18.72	3.1e-05	5.15e-05
18.96	-0.00012	-6.7e-05
19.2	-0.00015	8.18e-05
19.44	-5.4e-05	-3.6e-05
19.68	-4.6e-06	-0.0002
19.92	-0.00013	-0.00013
20.16	3.55e-05	-0.0001
20.4	6.03e-05	-6.9e-05
20.64	-0.00013	0.000118
20.88	-0.00015	-9.4e-05
21.12	-7.9e-05	-0.00045
21.36	9.27e-05	-0.00031
21.6	4.6e-05	1.77e-05
21.84	-6.8e-05	-2.7e-05
22.08	2.23e-05	-0.00023
22.32	-8.9e-05	-2.3e-05
22.56	-5.6e-05	-4e-05
22.8	0.000193	-5.3e-05
23.04	0.000124	-0.00012
23.28	-9.5e-05	-0.00012
23.52	0.000162	-0.00013
23.76	0.000173	-0.00018
24	-1.1e-05	-0.00019
24.24	-0.00017	-0.0001
24.48	-0.00028	5.92e-05
24.72	-0.00039	-5.5e-05
24.96	3.86e-06	-0.00011
25.2	-3.5e-05	-8.1e-05
25.44	1.3e-05	1.69e-06
25.68	5.01e-05	0.000142
25.92	-6.8e-05	-0.00022
26.16	3.21e-05	-0.00023
26.4	0.000134	-5.2e-05
26.64	-4.9e-05	-0.00021
26.88	-4.3e-05	-1.7e-05
27.12	-8.9e-05	-8.2e-05
27.36	-0.00023	-2.3e-05
27.6	-0.00017	-2.3e-05
27.84	-0.00023	-0.00028
28.08	-0.00012	-8.6e-05
28.32	-0.00025	-8.7e-05
28.56	-0.00016	5.74e-05
28.8	-0.00028	-0.00017
29.04	-0.00026	-0.00028
29.28	-0.00034	3.33e-05
29.52	-5.6e-05	-0.00033
29.76	-8.1e-05	-0.00016
30	-8.3e-05	-0.00011
30.24	7.11e-05	0.000266
30.48	0.000135	0.000114
30.72	-0.00815	-0.00776
30.96	0.028034	0.025725
31.2	-0.04686	-0.04737
31.44	0.10366	0.10938
31.68	0.012059	0.012154
31.92	0.000237	0.000161
32.16	0.000361	2.8e-05
32.4	5.15e-05	-1.2e-06
32.64	1.6e-05	0.000125
32.88	5e-05	0.000312
33.12	-2.2e-05	0.000375
33.36	0.000385	0.000172
33.6	4e-05	6.17e-05
33.84	0.000311	0.000167
34.08	1.98e-05	9.86e-05
34.32	0.000157	2.52e-05
34.56	9.22e-05	0.000279
34.8	2.12e-05	-9.2e-05
35.04	6.4e-06	0.000206
35.28	6.32e-05	1.1e-05
35.52	0.000145	-1.2e-05
35.76	5.47e-05	0.000241
36	0.000259	4.02e-05
36.24	0.000143	0.000224
36.48	-1.2e-05	-2.3e-05
36.72	0.000202	-2.3e-05
36.96	0.000328	6.75e-05
37.2	0.000218	-9.5e-05
37.44	-4.8e-05	0.000139
37.68	1.94e-06	0.000123
37.92	0.000138	5e-05
38.16	-0.00011	-3.5e-05
38.4	6.79e-05	5.39e-05
38.64	0.000196	9.09e-05
38.88	6.71e-05	0.000136
39.12	-0.00015	0.000196
39.36	-6.7e-05	0.00014
39.6	9.8e-05	5.46e-05
39.84	-0.00023	-3.2e-05
40.08	2.93e-05	0.0002
40.32	-9.5e-05	0.000116
40.56	-1.2e-05	-3.3e-05
40.8	0.000176	-5.6e-05
41.04	0.000233	8.8e-05
41.28	9.06e-05	-0.00017
41.52	1.29e-05	1.07e-05
41.76	-0.00014	6.98e-05
42	-0.00012	0.000217
42.24	-4.8e-05	-0.00016
42.48	0.000284	-0.00012
42.72	-2.7e-05	4.98e-05
42.96	-2.8e-05	5.82e-05
43.2	-4.6e-05	-0.0002
43.44	0.000117	-0.00012
43.68	-0.0004	-0.00024
43.92	2.01e-05	-6.4e-05
44.16	1.63e-05	3.27e-05
44.4	0.000123	-0.00011
44.64	-0.00018	5.99e-05
44.88	-9e-05	-1e-05
45.12	1.02e-05	0.000244
45.36	-6.4e-05	-8.5e-05
45.6	-8.7e-06	4.65e-05
45.84	2.15e-05	-0.00026
46.08	-0.00016	-0.00015
46.32	-2.9e-05	0.000205
46.56	-0.00021	-0.00012
46.8	2.84e-06	-0.00011
47.04	-0.00024	-0.00015
47.28	-9.6e-05	4.19e-05
47.52	-3.2e-05	-7.5e-05
47.76	-0.00021	-0.00024
48	-5.8e-05	-0.00026
48.24	-0.0002	-0.00013
48.48	4.77e-05	-3.9e-05
48.72	-8.3e-05	8.94e-05
48.96	-0.00025	-2.4e-05
49.2	-0.00026	-1.1e-05
49.44	9.21e-05	-4e-05
49.68	-0.00015	-0.00017
49.92	-5.7e-05	-3.9e-05
50.16	5.02e-05	-0.0002
50.4	2.34e-05	-2.7e-05
50.64	-0.00026	-0.00022
50.88	4.26e-05	-9.9e-05
51.12	8.29e-05	-0.00018
51.36	-8.9e-05	-0.00025
51.6	1.1e-06	-0.00036
51.84	-0.00015	-0.0001
52.08	-0.00014	4.54e-05
52.32	-0.00022	2.26e-05
52.56	1.03e-05	-0.0002
52.8	-0.00011	-0.00012
53.04	-8.6e-05	5.86e-05
53.28	-2.8e-05	-0.00021
53.52	-0.00025	-0.00019
53.76	-0.00014	-3.4e-05
54	-8.9e-05	-6.4e-05
54.24	-0.00016	-1.3e-05
54.48	-0.00028	-0.00031
54.72	-0.00036	-0.00022
54.96	-0.0001	-9.9e-05
55.2	-7.8e-05	-0.00015
55.44	2.99e-06	-0.00028
55.68	-0.00022	-0.00012
55.92	-0.00015	-0.00027
56.16	-0.00019	-8.5e-05
56.4	-0.00027	-0.00014
56.64	-0.00014	-0.00013
56.88	-0.00013	-0.0003
57.12	-3.6e-05	-5.5e-05
57.36	-0.00016	7.98e-05
57.6	-8.5e-05	-0.00018
57.84	-0.00038	-1.2e-05
58.08	-9.7e-05	-8.5e-05
58.32	-0.00012	-0.00016
58.56	-0.00025	-0.0004
58.8	-0.00016	3.69e-05
59.04	-0.00025	-0.00021
59.28	-8.3e-05	-0.00036
59.52	-8.1e-05	-6.3e-05
59.76	-0.00044	-0.00026
60	-0.00041	-0.00031
60.24	-0.00027	-0.00022
60.48	-0.00013	-0.0002
60.72	-0.00038	-0.00024
60.96	-0.00034	-5e-05
61.2	-0.00031	-3.7e-05
61.44	-5.5e-05	-0.00018
61.68	-0.00013	-0.00021
61.92	-2.6e-05	-1.7e-05
62.16	-7.5e-06	-0.00014
62.4	-0.00034	-0.00038
62.64	-0.00036	-0.00011
62.88	9.49e-05	-0.00014
63.12	-9.1e-05	-0.00023
63.36	-0.00047	-0.00033
63.6	-5.9e-05	-0.00039
63.84	-0.0002	-0.00052
64.08	-0.0002	-0.00034
64.32	-0.00028	-0.00034
64.56	-0.00026	-0.0003
64.8	-0.00011	-0.0005
65.04	-3.9e-05	-0.00021
65.28	-3.4e-05	-0.00048
65.52	1.83e-05	-0.00027
65.76	-0.00017	-0.00035
66	-0.0003	-0.00048
66.24	-0.00018	-0.0003
66.48	-0.00026	-0.00049
66.72	-4.1e-05	-0.00039
66.96	-4.4e-05	-0.00031
67.2	-0.00023	-0.00034
67.44	-0.0004	-0.00048
67.68	-0.00024	-0.00045
67.92	-0.00029	-0.00034
68.16	-0.00026	-0.00052
68.4	-8.4e-05	-0.00027
68.64	-0.0001	-0.00029
68.88	-8.9e-05	-0.00045
69.12	-7.2e-05	-0.00056
69.36	-0.00016	-0.00031
69.6	-0.00024	-0.0003
69.84	-0.00017	-0.00029
70.08	-0.00052	-0.00049
70.32	-0.00017	-0.00025
70.56	-0.00025	-0.00069
70.8	-8.4e-05	-0.00034
71.04	-0.00013	-0.00056
71.28	-0.00016	-0.00048
71.52	-0.00027	-0.00039
71.76	-0.00023	-0.00061
72	-0.00016	-0.00026
72.24	-0.00036	-0.00045
72.48	-0.00029	-0.00044
72.72	-0.00032	-0.00031
72.96	-0.00021	-0.0004
73.2	-0.00041	-0.00035
73.44	-0.00015	-0.00063
73.68	-0.00029	-0.00041
73.92	-0.00037	-0.0004
74.16	-0.00022	-0.00053
74.4	-0.00023	-0.00058
74.64	-0.00014	-0.00041
74.88	-0.00021	-0.00034
75.12	-0.00026	-0.00062
75.36	-0.00024	-0.00046
75.6	-0.00015	-0.00057
75.84	-0.00038	-0.00027
76.08	-0.00043	-0.00063
76.32	-0.00038	-0.00054
76.56	-0.00048	-0.00061
76.8	-0.00032	-0.00049
77.04	-0.00033	-0.00045
77.28	-0.00037	-0.00054
77.52	-0.00025	-0.00046
77.76	-0.00045	-0.00035
78	-0.00033	-0.00048
78.24	-0.00027	-0.00052
78.48	-0.00013	-0.00047
78.72	2.43e-06	-0.00028
78.96	-0.00026	-0.00055
79.2	-4.8e-05	-0.00065
79.44	-0.00035	-0.00046
79.68	-0.00039	-0.00063
79.92	-0.00053	-0.00053
80.16	-0.00036	-0.00055
80.4	-0.00045	-0.00043
80.64	-0.0004	-0.00081
80.88	-0.00032	-0.00061
81.12	-0.00023	-0.0006
81.36	-0.00022	-0.00072
81.6	-0.00035	-0.00061
81.84	-0.00026	-0.00072
82.08	-0.00031	-0.0005
82.32	-0.00035	-0.00049
82.56	-0.00051	-0.00045
82.8	-0.00027	-0.00056
83.04	-0.00033	-0.00058
83.28	-0.00034	-0.00067
83.52	-0.00013	-0.0007
83.76	-0.00032	-0.00036
84	-0.00046	-0.00068
84.24	-0.00034	-0.00049
84.48	-0.00053	-0.00052
84.72	-0.00048	-0.00053
84.96	-0.00047	-0.00071
85.2	-0.00026	-0.00059
85.44	-0.00046	-0.0005
85.68	-0.00041	-0.00056
85.92	-0.00063	-0.00064
86.16	-0.00025	-0.00038
86.4	-0.0004	-0.00056
86.64	-0.00043	-0.00043
86.88	-0.00044	-0.00059
87.12	-0.00058	-0.0007
87.36	-0.00046	-0.00067
87.6	-0.00045	-0.00047
87.84	-0.00044	-0.00069
88.08	-0.0003	-0.0006
88.32	-0.00047	-0.00051
88.56	-0.00065	-0.00056
88.8	-0.00054	-0.00048
89.04	-0.00066	-0.00065
89.28	-0.00039	-0.00062
89.52	-0.00048	-0.00062
89.76	-0.00049	-0.00063
90	-0.0005	-0.00067
90.24	-0.00024	-0.00085
90.48	-0.00042	-0.00071
90.72	-0.00041	-0.00072
90.96	-0.00036	-0.00047
91.2	-0.00055	-0.00059
91.44	-0.00046	-0.00072
91.68	-0.00054	-0.00083
91.92	-0.00021	-0.00049
92.16	-0.00054	-0.00058
92.4	-0.00036	-0.00084
92.64	-0.0005	-0.00054
92.88	-0.00022	-0.00087
93.12	-0.00054	-0.00059
93.36	-0.00021	-0.00073
93.6	-0.00025	-0.00072
93.84	-0.0005	-0.00059
94.08	-0.00055	-0.00081
94.32	-0.0006	-0.00058
94.56	-0.00027	-0.00063
94.8	-0.00054	-0.0006
95.04	-0.00058	-0.00064
95.28	-0.00075	-0.00074
95.52	-0.00053	-0.0007
95.76	-0.00038	-0.00062
96	-0.00043	-0.00076
96.24	-0.00027	-0.00075
96.48	-0.00051	-0.00077
96.72	-0.00039	-0.00068
96.96	-0.00033	-0.00063
97.2	-0.00051	-0.0007
97.44	-0.00035	-0.00055
97.68	-0.0005	-0.00079
97.92	-0.00037	-0.0009
98.16	-0.00081	-0.0009
98.4	-0.00054	-0.00076
98.64	-0.0006	-0.00065
98.88	-0.00069	-0.00069
99.12	-0.00068	-0.0006
99.36	-0.00036	-0.00091
99.6	-0.00062	-0.00067
99.84	-0.00033	-0.00106
100.08	-0.00024	-0.00067
100.32	-0.00025	-0.00083
100.56	-0.0005	-0.00093
100.8	-0.00074	-0.00078
101.04	-0.00055	-0.00066
101.28	-0.00056	-0.00057
101.52	-0.00039	-0.00087
101.76	-0.00054	-0.00072
102	-0.00052	-0.00075
102.24	-0.00068	-0.00071
102.48	-0.00043	-0.00089
102.72	-0.00066	-0.00102
102.96	-0.00067	-0.00078
103.2	-0.0004	-0.00091
103.44	-0.00053	-0.00064
103.68	-0.00031	-0.00089
103.92	-0.00051	-0.00081
104.16	-0.00079	-0.00082
104.4	-0.00068	-0.00064
104.64	-0.00059	-0.00094
104.88	-0.00049	-0.00076
105.12	-0.00045	-0.00089
105.36	-0.00066	-0.0007
105.6	-0.0005	-0.00073
105.84	-0.00092	-0.00069
106.08	-0.00053	-0.00082
106.32	-0.00045	-0.00075
106.56	-0.00063	-0.00081
106.8	-0.00069	-0.00092
107.04	-0.00065	-0.00087
107.28	-0.00057	-0.00061
107.52	-0.0007	-0.00087
107.76	-0.00057	-0.00082
108	-0.00031	-0.0008
108.24	-0.00071	-0.0009
108.48	-0.00082	-0.00078
108.72	-0.00068	-0.00077
108.96	-0.00049	-0.00069
109.2	-0.00075	-0.00089
109.44	-0.00053	-0.001
109.68	-0.00054	-0.00079
109.92	-0.00049	-0.001
110.16	-0.00072	-0.00082
110.4	-0.00044	-0.00069
110.64	-0.00055	-0.00105
110.88	-0.00056	-0.00097
111.12	-0.00036	-0.00075
111.36	-0.00056	-0.0009
111.6	-0.00079	-0.00099
111.84	-0.00047	-0.00083
112.08	-0.0005	-0.00063
112.32	-0.00053	-0.0008
112.56	-0.00075	-0.00103
112.8	-0.00054	-0.00101
113.04	-0.00067	-0.00089
113.28	-0.00085	-0.00101
113.52	-0.00061	-0.00087
113.76	-0.00051	-0.00094
114	-0.00043	-0.00083
114.24	-0.00078	-0.00101
114.48	-0.0006	-0.00082
114.72	-0.00078	-0.00077
114.96	-0.00058	-0.00111
115.2	-0.00043	-0.00087
115.44	-0.0008	-0.00115
115.68	-0.00066	-0.00089
115.92	-0.00084	-0.00093
116.16	-0.00062	-0.00101
116.4	-0.00051	-0.00122
116.64	-0.00066	-0.00104
116.88	-0.00055	-0.00107
117.12	-0.00055	-0.0011
117.36	-0.0007	-0.00083
117.6	-0.00058	-0.00104
117.84	-0.00076	-0.00086
118.08	-0.00063	-0.00081
118.32	-0.00072	-0.00103
118.56	-0.00076	-0.00096
118.8	-0.00069	-0.00107
119.04	-0.00049	-0.00095
119.28	-0.00057	-0.00106
119.52	-0.00065	-0.0007
119.76	-0.00069	-0.00107
120	-0.00068	-0.00103
120.24	-0.00045	-0.001
120.48	-0.00073	-0.00079
120.72	-0.00054	-0.00099
120.96	-0.00056	-0.00107
121.2	-0.00054	-0.0011
121.44	-0.00076	-0.0008
121.68	-0.00071	-0.00109
121.92	-0.00078	-0.00093
122.16	-0.00047	-0.00091
122.4	-0.00094	-0.00111
122.64	-0.00072	-0.0009
122.88	-0.00076	-0.00086
123.12	-0.00056	-0.00106
123.36	-0.00074	-0.00103
123.6	-0.00064	-0.00109
123.84	-0.00076	-0.00108
124.08	-0.00071	-0.00101
124.32	-0.00058	-0.00098
124.56	-0.00088	-0.00107
124.8	-0.0007	-0.00097
125.04	-0.00066	-0.00115
125.28	-0.00092	-0.00116
125.52	-0.00069	-0.00115
125.76	-0.00076	-0.00102
126	-0.00076	-0.00095
126.24	-0.00088	-0.00117
126.48	-0.00093	-0.00123
126.72	-0.00068	-0.00088
126.96	-0.00059	-0.00102
127.2	-0.00088	-0.00111
127.44	-0.00068	-0.00124
127.68	-0.0008	-0.00107
127.92	-0.00063	-0.00119
128.16	-0.00086	-0.00106
128.4	-0.00051	-0.00109
128.64	-0.00074	-0.00114
128.88	-0.00087	-0.00114
129.12	-0.00094	-0.00114
129.36	-0.00107	-0.00117
129.6	-0.0007	-0.0011
129.84	-0.0008	-0.00118
130.08	-0.00069	-0.00101
130.32	-0.0008	-0.00089
130.56	-0.00075	-0.00127
130.8	-0.0007	-0.00119
131.04	-0.00087	-0.00108
131.28	-0.00078	-0.00117
131.52	-0.00076	-0.00106
131.76	-0.0008	-0.00114
132	-0.00081	-0.00098
132.24	-0.00082	-0.00116
132.48	-0.00101	-0.00104
132.72	-0.00064	-0.00105
132.96	-0.00088	-0.00113
133.2	-0.00072	-0.00108
133.44	-0.001	-0.00092
133.68	-0.001	-0.00114
133.92	-0.00101	-0.00117
134.16	-0.00074	-0.00128
134.4	-0.00104	-0.00116
134.64	-0.00073	-0.00096
134.88	-0.00084	-0.00092
135.12	-0.00093	-0.00118
135.36	-0.00079	-0.00109
135.6	-0.00067	-0.00129
135.84	-0.0008	-0.00123
136.08	-0.00091	-0.00101
136.32	-0.00078	-0.00126
136.56	-0.00089	-0.00124
136.8	-0.00076	-0.00125
137.04	-0.00094	-0.0012
137.28	-0.00088	-0.00139
137.52	-0.00069	-0.00118
137.76	-0.00085	-0.00127
138	-0.00091	-0.00112
138.24	-0.00098	-0.00104
138.48	-0.00078	-0.00115
138.72	-0.00074	-0.00135
138.96	-0.00089	-0.00134
139.2	-0.00077	-0.00126
139.44	-0.00094	-0.00122
139.68	-0.00091	-0.0012
139.92	-0.00079	-0.0012
140.16	-0.00104	-0.00121
140.4	-0.00078	-0.00111
140.64	-0.0008	-0.00124
140.88	-0.00094	-0.0013
141.12	-0.00091	-0.00114
141.36	-0.00097	-0.00129
141.6	-0.00086	-0.00132
141.84	-0.00091	-0.0011
142.08	-0.00056	-0.0012
142.32	-0.0008	-0.00131
142.56	-0.00093	-0.00124
142.8	-0.00083	-0.00122
143.04	-0.00096	-0.00127
143.28	-0.00098	-0.00124
143.52	-0.00114	-0.00142
143.76	-0.00107	-0.00111
144	-0.00093	-0.0013
144.24	-0.0008	-0.00121
144.48	-0.00075	-0.00159
144.72	-0.00103	-0.00126
144.96	-0.00102	-0.00142
145.2	-0.00084	-0.00143
145.44	-0.00092	-0.00115
145.68	-0.00097	-0.00124
145.92	-0.00112	-0.0013
146.16	-0.00114	-0.00115
146.4	-0.001	-0.00124
146.64	-0.00111	-0.0013
146.88	-0.00082	-0.00127
147.12	-0.00086	-0.00133
147.36	-0.0009	-0.00121
147.6	-0.00108	-0.00128
147.84	-0.00076	-0.00152
148.08	-0.00088	-0.00125
148.32	-0.00094	-0.00108
148.56	-0.00081	-0.00134
148.8	-0.0011	-0.00132
149.04	-0.00073	-0.00144
149.28	-0.00093	-0.00112
149.52	-0.00082	-0.00132
149.76	-0.00088	-0.00122
150	-0.001	-0.00138
150.24	-0.00079	-0.00153
150.48	-0.00097	-0.00133
150.72	-0.00109	-0.00138
150.96	-0.0011	-0.00124
151.2	-0.00125	-0.00128
151.44	-0.00093	-0.00142
151.68	-0.00103	-0.00138
151.92	-0.00087	-0.0013
152.16	-0.00097	-0.0015
152.4	-0.00115	-0.00138
152.64	-0.00107	-0.00125
152.88	-0.00107	-0.00129
153.12	-0.00089	-0.00126
153.36	-0.00098	-0.00143
153.6	-0.0009	-0.00138
153.84	-0.00098	-0.00135
154.08	-0.00111	-0.00155
154.32	-0.00112	-0.00125
154.56	-0.00087	-0.00152
154.8	-0.00115	-0.0014
155.04	-0.00091	-0.00148
155.28	-0.00109	-0.00122
155.52	-0.00088	-0.00145
155.76	-0.00114	-0.00148
156	-0.001	-0.00132
156.24	-0.00122	-0.0013
156.48	-0.00099	-0.00137
156.72	-0.00094	-0.0013
156.96	-0.00109	-0.0014
157.2	-0.00097	-0.00125
157.44	-0.00115	-0.0014
157.68	-0.00123	-0.00148
157.92	-0.00108	-0.00143
158.16	-0.00094	-0.00152
158.4	-0.00096	-0.00153
158.64	-0.00114	-0.00134
158.88	-0.00105	-0.0014
159.12	-0.00099	-0.00137
159.36	-0.00117	-0.00145
159.6	-0.00106	-0.00148
159.84	-0.00085	-0.0013
160.08	-0.00106	-0.00138
160.32	-0.00096	-0.00133
160.56	-0.00114	-0.00142
160.8	-0.00095	-0.00158
161.04	-0.00112	-0.0013
161.28	-0.00107	-0.00139
161.52	-0.00104	-0.00148
161.76	-0.00101	-0.00134
162	-0.00102	-0.00145
162.24	-0.00116	-0.00144
162.48	-0.00124	-0.00134
162.72	-0.00115	-0.00129
162.96	-0.00096	-0.00134
163.2	-0.00102	-0.00148
163.44	-0.00119	-0.00151
163.68	-0.00123	-0.00158
163.92	-0.00101	-0.0015
164.16	-0.00113	-0.00143
164.4	-0.00125	-0.00158
164.64	-0.00102	-0.00133
164.88	-0.00102	-0.00167
165.12	-0.00098	-0.00146
165.36	-0.00112	-0.00141
165.6	-0.00093	-0.00153
165.84	-0.00108	-0.00145
166.08	-0.00107	-0.00154
166.32	-0.0013	-0.00153
166.56	-0.00114	-0.00148
166.8	-0.00111	-0.00148
167.04	-0.00115	-0.00126
167.28	-0.00102	-0.00161
167.52	-0.00117	-0.00155
167.76	-0.00105	-0.00159
168	-0.00123	-0.00137
168.24	-0.00106	-0.00196
168.48	-0.00099	-0.00141
168.72	-0.00073	-0.00143
168.96	-0.00121	-0.00156
169.2	-0.0011	-0.00159
169.44	-0.00104	-0.00158
169.68	-0.00101	-0.0016
169.92	-0.00096	-0.00142
170.16	-0.0011	-0.00163
170.4	-0.0012	-0.00175
170.64	-0.00114	-0.00163
170.88	-0.00105	-0.00172
171.12	-0.00115	-0.00152
171.36	-0.00129	-0.00162
171.6	-0.00096	-0.00155
171.84	-0.0013	-0.00158
172.08	-0.00132	-0.00146
172.32	-0.00114	-0.00151
172.56	-0.00131	-0.00163
172.8	-0.00123	-0.00151
173.04	-0.0014	-0.00151
173.28	-0.00119	-0.00174
173.52	-0.00113	-0.00154
173.76	-0.00132	-0.00153
174	-0.00125	-0.00162
174.24	-0.00125	-0.0016
174.48	-0.0013	-0.00182
174.72	-0.00123	-0.00173
174.96	-0.0011	-0.0016
175.2	-0.00131	-0.00169
175.44	-0.00122	-0.00177
175.68	-0.00127	-0.00153
175.92	-0.00118	-0.00165
176.16	-0.00132	-0.00164
176.4	-0.00127	-0.0017
176.64	-0.00126	-0.00161
176.88	-0.00146	-0.00167
177.12	-0.00131	-0.00167
177.36	-0.00121	-0.00152
177.6	-0.00116	-0.00147
177.84	-0.00143	-0.0018
178.08	-0.00109	-0.00176
178.32	-0.00114	-0.00147
178.56	-0.00138	-0.00139
178.8	-0.00132	-0.00168
179.04	-0.0011	-0.00173
179.28	-0.00129	-0.0016
179.52	-0.00126	-0.00151
179.76	-0.00108	-0.00177
180	-0.0014	-0.00175
180.24	-0.00102	-0.00177
180.48	-0.00106	-0.00159
180.72	-0.00126	-0.00178
180.96	-0.00129	-0.00178
181.2	-0.0011	-0.0018
181.44	-0.00125	-0.00164
181.68	-0.00126	-0.00178
181.92	-0.00123	-0.00154
182.16	-0.00125	-0.00177
182.4	-0.00107	-0.00168
182.64	-0.00143	-0.00142
182.88	-0.00127	-0.00154
183.12	-0.00115	-0.00168
183.36	-0.00111	-0.00184
183.6	-0.00118	-0.00163
183.84	-0.00137	-0.0016
184.08	-0.00118	-0.00183
184.32	-0.00124	-0.00182
184.56	-0.00143	-0.00179
184.8	-0.00133	-0.00156
185.04	-0.00116	-0.0016
185.28	-0.00149	-0.00178
185.52	-0.00127	-0.00156
185.76	-0.00136	-0.00143
186	-0.00112	-0.00157
186.24	-0.00125	-0.00181
186.48	-0.00128	-0.00193
186.72	-0.0014	-0.00176
186.96	-0.00131	-0.0018
187.2	-0.00147	-0.00171
187.44	-0.00101	-0.00168
187.68	-0.0012	-0.00157
187.92	-0.0013	-0.00172
188.16	-0.00124	-0.00177
188.4	-0.00116	-0.00186
188.64	-0.00131	-0.00189
188.88	-0.00134	-0.00181
189.12	-0.00144	-0.00187
189.36	-0.00124	-0.0018
189.6	-0.0012	-0.00167
189.84	-0.00123	-0.00166
190.08	-0.00129	-0.00187
190.32	-0.00138	-0.00168
190.56	-0.00133	-0.00169
190.8	-0.00136	-0.0018
191.04	-0.00134	-0.00191
191.28	-0.0013	-0.00173
191.52	-0.00111	-0.00185
191.76	-0.00129	-0.00158
192	-0.00129	-0.00174
192.24	-0.00145	-0.00148
192.48	-0.00138	-0.00154
192.72	-0.00159	-0.0017
192.96	-0.00162	-0.00189
193.2	-0.00115	-0.0017
193.44	-0.00136	-0.00177
193.68	-0.00118	-0.00184
193.92	-0.0012	-0.00158
194.16	-0.00148	-0.00208
194.4	-0.00138	-0.00185
194.64	-0.00146	-0.00197
194.88	-0.00124	-0.00198
195.12	-0.00149	-0.00186
195.36	-0.00145	-0.00176
195.6	-0.00126	-0.00176
195.84	-0.00136	-0.00164
196.08	-0.0013	-0.00181
196.32	-0.00148	-0.00177
196.56	-0.0014	-0.00186
196.8	-0.00138	-0.00183
197.04	-0.00139	-0.00177
197.28	-0.00156	-0.00187
197.52	-0.00135	-0.00177
197.76	-0.00122	-0.00197
198	-0.00155	-0.00179
198.24	-0.0013	-0.002
198.48	-0.00137	-0.00192
198.72	-0.00139	-0.00205
198.96	-0.00128	-0.002
199.2	-0.00134	-0.00199
199.44	-0.00137	-0.00208
199.68	-0.00132	-0.00197
199.92	-0.00138	-0.00164
200.16	-0.00159	-0.00179
200.4	-0.00124	-0.00198
200.64	-0.00159	-0.00182
200.88	-0.00135	-0.00206
201.12	-0.00135	-0.00164
201.36	-0.00122	-0.0018
201.6	-0.00158	-0.00179
201.84	-0.00141	-0.00189
202.08	-0.00149	-0.00179
202.32	-0.00139	-0.0018
202.56	-0.00155	-0.00188
202.8	-0.00148	-0.00198
203.04	-0.00169	-0.00181
203.28	-0.00132	-0.00199
203.52	-0.00155	-0.00211
203.76	-0.00143	-0.00191
204	-0.0013	-0.00187
204.24	-0.0015	-0.00198
204.48	-0.00154	-0.002
204.72	-0.00174	-0.0019
204.96	-0.00139	-0.00215
205.2	-0.00148	-0.00186
205.44	-0.00133	-0.00179
205.68	-0.00143	-0.00188
205.92	-0.00147	-0.00198
206.16	-0.00154	-0.00179
206.4	-0.00145	-0.00189
206.64	-0.00144	-0.00212
206.88	-0.00169	-0.002
207.12	-0.00158	-0.0019
207.36	-0.00142	-0.00184
207.6	-0.00113	-0.00198
207.84	-0.00167	-0.00189
208.08	-0.00123	-0.00188
208.32	-0.00146	-0.00205
208.56	-0.00157	-0.00196
208.8	-0.00131	-0.00189
209.04	-0.00129	-0.00182
209.28	-0.0014	-0.00169
209.52	-0.00152	-0.00196
209.76	-0.00159	-0.00181
210	-0.00149	-0.00196
210.24	-0.00157	-0.00194
210.48	-0.00135	-0.00213
210.72	-0.00147	-0.00192
210.96	-0.00154	-0.00215
211.2	-0.00156	-0.00198
211.44	-0.00132	-0.002
211.68	-0.00124	-0.00193
211.92	-0.00154	-0.00214
212.16	-0.00196	-0.00177
212.4	-0.0017	-0.00194
212.64	-0.00158	-0.00214
212.88	-0.00157	-0.00179
213.12	-0.00152	-0.00197
213.36	-0.00148	-0.00204
213.6	-0.00161	-0.00202
213.84	-0.0018	-0.00181
214.08	-0.00163	-0.00213
214.32	-0.00157	-0.00188
214.56	-0.00141	-0.00202
214.8	-0.00141	-0.00184
215.04	-0.00167	-0.00206
215.28	-0.00148	-0.00203
215.52	-0.00147	-0.00213
215.76	-0.00147	-0.00213
216	-0.00149	-0.00191
216.24	-0.0016	-0.00223
216.48	-0.00154	-0.00186
216.72	-0.00134	-0.00205
216.96	-0.00151	-0.0021
217.2	-0.00164	-0.00212
217.44	-0.00162	-0.00215
217.68	-0.00167	-0.0023
217.92	-0.00159	-0.00214
218.16	-0.0017	-0.00211
218.4	-0.00185	-0.00202
218.64	-0.00145	-0.00202
218.88	-0.00172	-0.00224
219.12	-0.00155	-0.00191
219.36	-0.00155	-0.0021
219.6	-0.0017	-0.00186
219.84	-0.00147	-0.00214
220.08	-0.00153	-0.00215
220.32	-0.00172	-0.00212
220.56	-0.00167	-0.00206
220.8	-0.00162	-0.00205
221.04	-0.00148	-0.00219
221.28	-0.00167	-0.0021
221.52	-0.00166	-0.00212
221.76	-0.00159	-0.00198
222	-0.00171	-0.00202
222.24	-0.00158	-0.00226
222.48	-0.00177	-0.00215
222.72	-0.00158	-0.00186
222.96	-0.0015	-0.00201
223.2	-0.0016	-0.00209
223.44	-0.00151	-0.00215
223.68	-0.00181	-0.00205
223.92	-0.00159	-0.00216
224.16	-0.00146	-0.00208
224.4	-0.00172	-0.00197
224.64	-0.00167	-0.00204
224.88	-0.00173	-0.00243
225.12	-0.00165	-0.00218
225.36	-0.00154	-0.00226
225.6	-0.00179	-0.00208
225.84	-0.00162	-0.0023
226.08	-0.00164	-0.00223
226.32	-0.00155	-0.00225
226.56	-0.00171	-0.00216
226.8	-0.00186	-0.00236
227.04	-0.00131	-0.00206
227.28	-0.00187	-0.00212
227.52	-0.00143	-0.00209
227.76	-0.00171	-0.00213
228	-0.00163	-0.00212
228.24	-0.00155	-0.0021
228.48	-0.00164	-0.00216
228.72	-0.00167	-0.0021
228.96	-0.00192	-0.00215
229.2	-0.00161	-0.00201
229.44	-0.0018	-0.00209
229.68	-0.00195	-0.00222
229.92	-0.00152	-0.00219
230.16	-0.00162	-0.00229
230.4	-0.00161	-0.00235
230.64	-0.0016	-0.00236
230.88	-0.00152	-0.00224
231.12	-0.00164	-0.00226
231.36	-0.00156	-0.00242
231.6	-0.00168	-0.00222
231.84	-0.00172	-0.00227
232.08	-0.00176	-0.00226
232.32	-0.00162	-0.00212
232.56	-0.00167	-0.00204
232.8	-0.00178	-0.00226
233.04	-0.00168	-0.00224
233.28	-0.00151	-0.00227
233.52	-0.0016	-0.00185
233.76	-0.00181	-0.00225
234	-0.00154	-0.00202
234.24	-0.00182	-0.00203
234.48	-0.00185	-0.00246
234.72	-0.00178	-0.00212
234.96	-0.00178	-0.00227
235.2	-0.00166	-0.00239
235.44	-0.0018	-0.00233
235.68	-0.00174	-0.00234
235.92	-0.00187	-0.00212
236.16	-0.00186	-0.00231
236.4	-0.00156	-0.00221
236.64	-0.00173	-0.00223
236.88	-0.00181	-0.00244
237.12	-0.00165	-0.00245
237.36	-0.00179	-0.00229
237.6	-0.00188	-0.00215
237.84	-0.00187	-0.00217
238.08	-0.0019	-0.00212
238.32	-0.00177	-0.00203
238.56	-0.00187	-0.00233
238.8	-0.00182	-0.00219
239.04	-0.00183	-0.00228
239.28	-0.00165	-0.00243
239.52	-0.0018	-0.00222
239.76	-0.00184	-0.00243

## Sheet: M4R
Time	Exp1	Exp2
0	7.99841e-05	0.000317597
0.24	0.000170804	0.00034778
0.48	-3.90729e-05	-1.36661e-06
0.72	0.000187839	0.000145111
0.96	0.000258509	-9.06422e-05
1.2	-4.68082e-05	0.000263094
1.44	0.000142476	0.000200699
1.68	0.000165178	-9.68535e-05
1.92	4.54487e-05	-7.19325e-06
2.16	0.000125465	0.000210665
2.4	9.09581e-05	2.16823e-05
2.64	4.81775e-05	9.31694e-05
2.88	-5.05488e-05	6.67619e-05
3.12	0.000277705	0.000135959
3.36	-0.00013174	0.00011677
3.6	7.97165e-05	2.74137e-05
3.84	0.00045221	0.000250983
4.08	-6.14562e-05	0.0001083
4.32	0.000160031	0.000128136
4.56	-3.2572e-05	0.000229368
4.8	0.000230996	0.00014371
5.04	0.000262434	0.000131919
5.28	0.000317072	8.25574e-05
5.52	0.000128565	0.000153319
5.76	-5.74099e-05	7.88782e-05
6	2.62306e-05	0.000307424
6.24	-0.000118467	2.67603e-06
6.48	7.95455e-05	8.91568e-05
6.72	-4.03122e-07	3.8002e-05
6.96	-9.45009e-06	0.000197911
7.2	0.000228979	0.000259525
7.44	-3.30294e-06	0.000122937
7.68	0.000143502	0.000114576
7.92	6.13753e-05	0.000172149
8.16	-2.63624e-05	0.000243505
8.4	0.00012227	-5.43673e-05
8.64	0.000266205	3.4853e-05
8.88	-8.36123e-06	8.98608e-05
9.12	0.000149208	4.97927e-05
9.36	0.000241295	0.000108259
9.6	9.6412e-05	-3.70107e-05
9.84	-0.00022046	0.000274669
10.08	5.58683e-07	0.000170715
10.32	0.000236454	-0.000171959
10.56	-6.48943e-05	7.31796e-05
10.8	0.000112886	-2.42193e-05
11.04	0.000181202	0.000114899
11.28	5.52686e-05	-1.82479e-05
11.52	5.25501e-05	0.000228058
11.76	6.89489e-05	6.65237e-05
12	0.000138163	-3.44139e-05
12.24	-8.83235e-05	3.05623e-06
12.48	-2.17743e-05	0.00017788
12.72	-4.17985e-05	0.000224068
12.96	-0.000269158	0.000139405
13.2	0.000133389	-5.88617e-05
13.44	-0.000159263	7.81467e-05
13.68	4.0398e-05	-6.21094e-05
13.92	0.000361463	-5.47739e-05
14.16	4.76214e-05	0.000279854
14.4	8.21869e-06	-0.000132426
14.64	4.24731e-05	2.75791e-05
14.88	-2.787e-05	0.000181745
15.12	-0.000139125	0.00025838
15.36	2.45122e-05	5.01272e-05
15.6	-0.000108907	-4.22145e-05
15.84	1.96015e-05	-4.49812e-05
16.08	-1.74349e-05	-0.000182458
16.32	-1.94507e-05	-0.000149149
16.56	-0.00032186	-0.000141674
16.8	0.000150402	-0.000198669
17.04	0.000120144	-4.4772e-05
17.28	-0.000183763	8.15736e-05
17.52	2.01649e-05	-6.41011e-05
17.76	4.56096e-05	-4.59338e-05
18	-8.06334e-06	1.14906e-05
18.24	-6.90778e-05	4.50323e-05
18.48	-6.52853e-05	-5.44556e-05
18.72	-0.000109743	-0.000127352
18.96	-9.52846e-05	0.000127535
19.2	-4.33226e-05	1.25361e-05
19.44	-1.31586e-05	1.42703e-05
19.68	-0.000166495	-4.7534e-05
19.92	0.000183971	-0.000207105
20.16	-1.11937e-05	-3.83139e-05
20.4	-0.000197976	0.000162348
20.64	-0.000116936	-1.3295e-06
20.88	-0.000164305	-7.11727e-05
21.12	-0.000265303	-5.63934e-05
21.36	-5.55048e-05	-5.27275e-05
21.6	-0.000178903	-0.000113551
21.84	-0.00028276	-0.000116275
22.08	-4.55837e-05	-9.49887e-05
22.32	-1.05361e-05	-0.00027229
22.56	-0.000171659	-6.61933e-05
22.8	-0.000209845	-5.56703e-05
23.04	-0.000141315	7.37214e-05
23.28	-0.000336948	-6.53934e-05
23.52	-9.49668e-06	-0.000170383
23.76	2.18019e-05	-8.70976e-05
24	-2.07022e-05	-0.000247219
24.24	-3.05303e-05	-4.2714e-05
24.48	-9.75633e-05	-0.000103958
24.72	-0.000154287	-0.000132496
24.96	0.0001124	-0.000324889
25.2	-1.72281e-06	7.00696e-05
25.44	0.000118612	-0.000348225
25.68	-5.25452e-06	-0.000227735
25.92	0.000119388	-1.03167e-05
26.16	-0.000218819	-0.000237364
26.4	-0.000274585	5.89863e-05
26.64	-0.000158056	-0.000205678
26.88	-0.000129782	-0.000118921
27.12	-0.000186907	-0.00028689
27.36	3.94865e-05	-0.000161704
27.6	-0.000104126	-0.000362177
27.84	-0.000115523	-3.98581e-05
28.08	-0.000181286	-0.000176683
28.32	-0.000180822	-0.000225602
28.56	-6.55529e-06	-0.000200931
28.8	8.71979e-05	-0.000261777
29.04	-0.000100808	-0.000171941
29.28	-0.000241224	-0.000261372
29.52	0.000106013	-0.000273897
29.76	-4.02096e-05	-0.000211373
30	-5.92071e-05	-1.29292e-05
30.24	0.000508087	0.000126387
30.48	0.000479576	0.000338026
30.72	-0.00895934	-0.00831678
30.96	-0.0608263	0.0245397
31.2	-0.0501356	-0.0482382
31.44	0.109399	0.112474
31.68	0.0138367	0.0130867
31.92	0.00117189	0.00107382
32.16	0.000948767	0.00079863
32.4	0.00148697	0.000989356
32.64	0.0013325	0.0011254
32.88	0.00147105	0.0010487
33.12	0.00143326	0.0012202
33.36	0.00148208	0.00126573
33.6	0.00171242	0.00121585
33.84	0.00169758	0.00157829
34.08	0.00176456	0.00168116
34.32	0.00181395	0.00145437
34.56	0.00196414	0.00153514
34.8	0.00207066	0.00176816
35.04	0.00204336	0.00165808
35.28	0.0021016	0.00178285
35.52	0.00215285	0.00182125
35.76	0.0023642	0.00192791
36	0.00211953	0.00202072
36.24	0.00238608	0.00182967
36.48	0.00231843	0.00209497
36.72	0.0024606	0.00210147
36.96	0.00245279	0.00195484
37.2	0.00268433	0.00221895
37.44	0.00277149	0.00223
37.68	0.00266976	0.00243573
37.92	0.00294094	0.00238239
38.16	0.00272288	0.00241743
38.4	0.00297699	0.0024432
38.64	0.00272981	0.00249422
38.88	0.00269649	0.00244428
39.12	0.00283622	0.00242875
39.36	0.00304909	0.00245421
39.6	0.00295134	0.00244978
39.84	0.00275621	0.00255993
40.08	0.00319553	0.00265625
40.32	0.00307566	0.00275026
40.56	0.00323042	0.00258298
40.8	0.00309428	0.00297702
41.04	0.00328819	0.0028183
41.28	0.00336194	0.00286057
41.52	0.00352381	0.00275732
41.76	0.00321739	0.00286566
42	0.00358039	0.00296101
42.24	0.00360304	0.0030913
42.48	0.00348491	0.00310452
42.72	0.00330868	0.00301558
42.96	0.00368039	0.00297187
43.2	0.00361629	0.00291543
43.44	0.0032705	0.00288431
43.68	0.00339057	0.00299387
43.92	0.00337317	0.0032618
44.16	0.0034314	0.00325322
44.4	0.00335046	0.0033846
44.64	0.00354743	0.00306356
44.88	0.00377854	0.00319852
45.12	0.00346267	0.00304848
45.36	0.00356398	0.00300686
45.6	0.00352824	0.00319331
45.84	0.00394409	0.00332774
46.08	0.00370351	0.00329953
46.32	0.00363487	0.00336516
46.56	0.00378183	0.0033141
46.8	0.00385032	0.00316336
47.04	0.00396166	0.00314044
47.28	0.00388051	0.00344106
47.52	0.00371143	0.00338935
47.76	0.00376557	0.00361959
48	0.00384545	0.00350363
48.24	0.00348593	0.00339128
48.48	0.00368596	0.00344167
48.72	0.00387736	0.00345973
48.96	0.00413364	0.00333253
49.2	0.00374428	0.00356898
49.44	0.00430486	0.00348373
49.68	0.00405339	0.00360067
49.92	0.00392426	0.00358497
50.16	0.00377274	0.00352347
50.4	0.00367203	0.00348148
50.64	0.00402531	0.00329105
50.88	0.00438883	0.00364956
51.12	0.00383018	0.00350639
51.36	0.00399188	0.00359874
51.6	0.00385704	0.00363201
51.84	0.00392285	0.00362892
52.08	0.00378503	0.00344583
52.32	0.00406309	0.0035804
52.56	0.00393721	0.0033233
52.8	0.00419061	0.00340275
53.04	0.00375734	0.00376237
53.28	0.00414631	0.00335907
53.52	0.00410534	0.00358168
53.76	0.00411266	0.0036
54	0.0042547	0.00358803
54.24	0.00430179	0.00369384
54.48	0.00427124	0.00371828
54.72	0.00402801	0.00376416
54.96	0.00412128	0.00377884
55.2	0.0043405	0.00350928
55.44	0.00400032	0.00383165
55.68	0.00433061	0.003654
55.92	0.00404243	0.00357972
56.16	0.00430756	0.00388808
56.4	0.00416355	0.00377817
56.64	0.00375729	0.00384587
56.88	0.00419222	0.00363941
57.12	0.00423765	0.00375302
57.36	0.00443445	0.00374268
57.6	0.00401536	0.00370232
57.84	0.0041811	0.0037217
58.08	0.0039835	0.00375216
58.32	0.00436498	0.00386331
58.56	0.0041813	0.00377732
58.8	0.00414922	0.00363636
59.04	0.0041991	0.00369931
59.28	0.00431201	0.00353723
59.52	0.00419167	0.00374584
59.76	0.00431913	0.00380579
60	0.00409287	0.00382383
60.24	0.00430843	0.00378851
60.48	0.00412792	0.00375002
60.72	0.00432898	0.00387641
60.96	0.00431542	0.00385246
61.2	0.00417999	0.00364721
61.44	0.00408899	0.0037787
61.68	0.0044075	0.00387635
61.92	0.00388663	0.00389653
62.16	0.00424582	0.00373382
62.4	0.00430113	0.00377894
62.64	0.00412728	0.00396515
62.88	0.00450364	0.00385227
63.12	0.00422282	0.00419455
63.36	0.00406677	0.0040509
63.6	0.00413042	0.00398391
63.84	0.00410518	0.00394769
64.08	0.00440967	0.0038976
64.32	0.0044864	0.003881
64.56	0.00432045	0.00383216
64.8	0.00429053	0.0037147
65.04	0.00422368	0.00397083
65.28	0.00423036	0.00374755
65.52	0.0044771	0.00373452
65.76	0.00429826	0.00395402
66	0.004614	0.00387901
66.24	0.00420878	0.0037951
66.48	0.00435708	0.00394491
66.72	0.00422538	0.00389947
66.96	0.00418035	0.00388906
67.2	0.00450532	0.00381431
67.44	0.00437055	0.00403499
67.68	0.00431439	0.004271
67.92	0.00421531	0.00375688
68.16	0.00431452	0.00394772
68.4	0.00421199	0.00411477
68.64	0.00426083	0.00382271
68.88	0.00422111	0.00388791
69.12	0.00414344	0.00387017
69.36	0.00437366	0.0040507
69.6	0.00451174	0.00392996
69.84	0.00430881	0.00394605
70.08	0.00390406	0.00408927
70.32	0.00417586	0.00392022
70.56	0.00434777	0.00402887
70.8	0.00431718	0.00395503
71.04	0.00402757	0.00383312
71.28	0.00440927	0.00389009
71.52	0.00425738	0.00385935
71.76	0.00422023	0.00392405
72	0.00423208	0.00397963
72.24	0.00426615	0.00383512
72.48	0.00373429	0.00421892
72.72	0.00427069	0.00391752
72.96	0.00434882	0.00381651
73.2	0.00406899	0.00370762
73.44	0.00434789	0.00387728
73.68	0.00438762	0.00387707
73.92	0.00430952	0.00405627
74.16	0.00423927	0.00396514
74.4	0.00437109	0.00397368
74.64	0.00418061	0.00387719
74.88	0.00404205	0.0040109
75.12	0.0041442	0.00398643
75.36	0.00454911	0.00393396
75.6	0.00398825	0.00406192
75.84	0.00440515	0.00404955
76.08	0.00419169	0.00371526
76.32	0.00418197	0.0039359
76.56	0.00404579	0.0038752
76.8	0.00424158	0.00388609
77.04	0.0041695	0.00398641
77.28	0.00425418	0.00402081
77.52	0.00413976	0.00381694
77.76	0.00404704	0.00375462
78	0.00407414	0.00386415
78.24	0.00382753	0.0039443
78.48	0.00430151	0.00404842
78.72	0.00420819	0.00386315
78.96	0.0042224	0.00391885
79.2	0.00425882	0.00388194
79.44	0.00412894	0.00400967
79.68	0.00417245	0.00377558
79.92	0.00389624	0.00412435
80.16	0.00430675	0.00385165
80.4	0.00422563	0.00405291
80.64	0.00397776	0.0038666
80.88	0.00421679	0.00397466
81.12	0.00414333	0.00411749
81.36	0.0041796	0.00389688
81.6	0.00445611	0.00406955
81.84	0.00423442	0.00386399
82.08	0.00409056	0.00392724
82.32	0.0042073	0.00407687
82.56	0.0040692	0.00381695
82.8	0.00391303	0.0040203
83.04	0.00395972	0.00401557
83.28	0.00429416	0.00407318
83.52	0.00405883	0.00394348
83.76	0.00416961	0.00406139
84	0.00423461	0.00389481
84.24	0.00405653	0.00376589
84.48	0.00427976	0.00423474
84.72	0.00436282	0.00390406
84.96	0.00407354	0.00396966
85.2	0.00406641	0.00391231
85.44	0.00400621	0.00404548
85.68	0.00387098	0.00390237
85.92	0.00419324	0.00399726
86.16	0.00391298	0.00400214
86.4	0.00420484	0.00405143
86.64	0.0041017	0.00400511
86.88	0.00418214	0.00398096
87.12	0.00409135	0.00384477
87.36	0.00432934	0.00387117
87.6	0.00389283	0.00421255
87.84	0.00410526	0.00381849
88.08	0.00412187	0.00397058
88.32	0.0041828	0.00396587
88.56	0.00388625	0.00409672
88.8	0.00416776	0.00376166
89.04	0.00401643	0.0039571
89.28	0.00410296	0.00416853
89.52	0.00424891	0.00392072
89.76	0.00407618	0.00389043
90	0.00414832	0.00394244
90.24	0.00403908	0.00402224
90.48	0.00402293	0.00406906
90.72	0.00407192	0.00379245
90.96	0.00414219	0.00373176
91.2	0.00402534	0.00409748
91.44	0.00393647	0.0041575
91.68	0.00405946	0.00378902
91.92	0.00393619	0.00388132
92.16	0.0040143	0.00384192
92.4	0.00382384	0.00392077
92.64	0.00390685	0.00381871
92.88	0.00412028	0.00407306
93.12	0.00389443	0.00397489
93.36	0.00422124	0.00395584
93.6	0.00373841	0.00391154
93.84	0.0038185	0.00378831
94.08	0.00413603	0.00401632
94.32	0.00376614	0.00385783
94.56	0.00425093	0.00393147
94.8	0.00414181	0.0040754
95.04	0.00393089	0.00389192
95.28	0.00395493	0.0043214
95.52	0.00407615	0.00403649
95.76	0.00421479	0.00395821
96	0.00387545	0.00394344
96.24	0.00384967	0.00389335
96.48	0.00387015	0.00387622
96.72	0.0038648	0.00384743
96.96	0.00388345	0.00399814
97.2	0.00411603	0.00388205
97.44	0.00397896	0.00381657
97.68	0.00393252	0.00397196
97.92	0.00371614	0.00399377
98.16	0.00401527	0.00391628
98.4	0.00383792	0.0038779
98.64	0.00389746	0.00384375
98.88	0.00373042	0.00383577
99.12	0.00387288	0.00384528
99.36	0.00394329	0.00394956
99.6	0.00392921	0.00376415
99.84	0.00404728	0.00369444
100.08	0.00379682	0.00397294
100.32	0.00391111	0.00378181
100.56	0.00391502	0.0037822
100.8	0.00358567	0.00379388
101.04	0.00382841	0.00401101
101.28	0.00381251	0.00384334
101.52	0.00387638	0.00387837
101.76	0.00413241	0.00370936
102	0.00373953	0.00389672
102.24	0.00395232	0.00400903
102.48	0.00390851	0.00379914
102.72	0.00364272	0.00371556
102.96	0.00357539	0.00397805
103.2	0.00378075	0.00377996
103.44	0.00390688	0.00387769
103.68	0.00353713	0.0039369
103.92	0.00414297	0.00384846
104.16	0.00361669	0.00389313
104.4	0.00405341	0.00388266
104.64	0.00397682	0.0038616
104.88	0.00412029	0.0038843
105.12	0.00382544	0.00378563
105.36	0.00419683	0.00380777
105.6	0.00356656	0.00385616
105.84	0.00373173	0.00372269
106.08	0.00403157	0.00389593
106.32	0.00364224	0.00391857
106.56	0.00386503	0.00395283
106.8	0.00385594	0.00374526
107.04	0.00384288	0.00396457
107.28	0.00352637	0.00372927
107.52	0.00383883	0.00401012
107.76	0.00376061	0.00390268
108	0.00367171	0.00387081
108.24	0.00366226	0.00381492
108.48	0.00372243	0.00387615
108.72	0.00360921	0.00360742
108.96	0.00370481	0.00386597
109.2	0.00378384	0.00380037
109.44	0.00365712	0.00352919
109.68	0.00379701	0.00376566
109.92	0.00382572	0.00379924
110.16	0.0038706	0.00379283
110.4	0.00363461	0.00392362
110.64	0.00391397	0.00388093
110.88	0.00356474	0.00368005
111.12	0.00365858	0.0036165
111.36	0.00367836	0.00375434
111.6	0.00368733	0.00398683
111.84	0.00367064	0.00385117
112.08	0.00371196	0.00365506
112.32	0.0034911	0.00381558
112.56	0.00374208	0.00380195
112.8	0.00387269	0.00384632
113.04	0.00368646	0.00380224
113.28	0.0035935	0.00382124
113.52	0.00358925	0.00353111
113.76	0.00373432	0.00373927
114	0.00346416	0.00383361
114.24	0.00351894	0.00368878
114.48	0.00349093	0.0035739
114.72	0.00336224	0.00375685
114.96	0.00377137	0.00379486
115.2	0.00367409	0.00364083
115.44	0.00356515	0.00361547
115.68	0.00358631	0.00371468
115.92	0.00397906	0.00350001
116.16	0.00338754	0.00350148
116.4	0.00351097	0.00363915
116.64	0.0036979	0.00371119
116.88	0.00343649	0.00372029
117.12	0.00358444	0.00356551
117.36	0.00369287	0.00357416
117.6	0.00354672	0.00364515
117.84	0.00364135	0.00367589
118.08	0.00339256	0.00371933
118.32	0.00330219	0.0037783
118.56	0.00344308	0.00362617
118.8	0.00355325	0.00369788
119.04	0.00357909	0.00355642
119.28	0.00358522	0.00379087
119.52	0.00341566	0.00341741
119.76	0.00354217	0.00365891
120	0.00369587	0.00351944
120.24	0.00357529	0.00366589
120.48	0.00373502	0.00341042
120.72	0.00365825	0.00369072
120.96	0.00351541	0.00355789
121.2	0.00331573	0.00373464
121.44	0.00330325	0.00377526
121.68	0.00351967	0.00359684
121.92	0.00349917	0.00345343
122.16	0.00342686	0.00354049
122.4	0.0032732	0.00361112
122.64	0.00339537	0.00358454
122.88	0.00329188	0.00364203
123.12	0.00366414	0.00382192
123.36	0.0034205	0.00355899
123.6	0.00376584	0.00350402
123.84	0.00350946	0.00385579
124.08	0.00328418	0.00360516
124.32	0.00323592	0.00363594
124.56	0.00335644	0.00352107
124.8	0.00356156	0.00364231
125.04	0.00357554	0.00361514
125.28	0.00327358	0.00375493
125.52	0.00353425	0.00370646
125.76	0.00369035	0.0037068
126	0.00341957	0.00359035
126.24	0.00353227	0.00338762
126.48	0.00327084	0.0035622
126.72	0.00339832	0.00363296
126.96	0.00357217	0.00368521
127.2	0.00330376	0.00369493
127.44	0.0035533	0.00365975
127.68	0.003326	0.00357117
127.92	0.00344449	0.00355309
128.16	0.00354036	0.00353131
128.4	0.00334763	0.00349221
128.64	0.00339549	0.0035653
128.88	0.00339724	0.00346096
129.12	0.0033313	0.00366724
129.36	0.00314493	0.0037389
129.6	0.00332212	0.0034572
129.84	0.00338543	0.00342557
130.08	0.00337945	0.00353245
130.32	0.00330889	0.00345994
130.56	0.0032927	0.00340874
130.8	0.00338212	0.00337377
131.04	0.00319915	0.00377605
131.28	0.00322782	0.00362277
131.52	0.00331944	0.00351478
131.76	0.00316679	0.00368347
132	0.00306814	0.0034676
132.24	0.00296967	0.00362412
132.48	0.00343645	0.00385501
132.72	0.00316432	0.00365213
132.96	0.00309635	0.00341928
133.2	0.00347235	0.00348424
133.44	0.00336622	0.003435
133.68	0.00330141	0.00364207
133.92	0.00311518	0.00372114
134.16	0.00307088	0.00343156
134.4	0.00308491	0.00363782
134.64	0.00299056	0.00332342
134.88	0.00319338	0.00327896
135.12	0.00314768	0.0032329
135.36	0.00337155	0.00373844
135.6	0.00349454	0.00354544
135.84	0.00328838	0.00353664
136.08	0.00298173	0.00353233
136.32	0.0031528	0.00348331
136.56	0.00310613	0.00341644
136.8	0.00313485	0.00330929
137.04	0.00326979	0.00339869
137.28	0.00318909	0.00324332
137.52	0.00332711	0.00356347
137.76	0.00303395	0.0035658
138	0.0031607	0.00342834
138.24	0.00317306	0.00347806
138.48	0.00305609	0.00342874
138.72	0.00309444	0.00334493
138.96	0.00314343	0.00342464
139.2	0.00321419	0.00358525
139.44	0.00293606	0.00329918
139.68	0.0030288	0.0036278
139.92	0.00293707	0.00339323
140.16	0.00302727	0.00357852
140.4	0.00282548	0.00338957
140.64	0.00307705	0.00340314
140.88	0.0032063	0.00341656
141.12	0.0030543	0.00341988
141.36	0.00316362	0.00332196
141.6	0.00300439	0.00325497
141.84	0.00307716	0.00346149
142.08	0.0030525	0.00336675
142.32	0.00294672	0.00324111
142.56	0.00303951	0.0033468
142.8	0.00306021	0.00338306
143.04	0.00310111	0.00343268
143.28	0.00288409	0.00315426
143.52	0.00318649	0.00335616
143.76	0.00299582	0.00330674
144	0.00314042	0.00333464
144.24	0.00308941	0.00350335
144.48	0.0032312	0.00335887
144.72	0.00312082	0.00322289
144.96	0.00297682	0.00338275
145.2	0.00279756	0.00357113
145.44	0.00316601	0.0031731
145.68	0.00314503	0.00327257
145.92	0.00307235	0.00341356
146.16	0.00297287	0.0032599
146.4	0.00322858	0.00348399
146.64	0.00289941	0.00327248
146.88	0.00270133	0.0032411
147.12	0.003113	0.00329167
147.36	0.00268853	0.00330883
147.6	0.00311118	0.00317312
147.84	0.00303028	0.00350306
148.08	0.00283747	0.00322497
148.32	0.00311726	0.00327424
148.56	0.00306918	0.00330081
148.8	0.00267138	0.00310901
149.04	0.00319057	0.00328238
149.28	0.00295494	0.00317207
149.52	0.00268213	0.00329426
149.76	0.00294277	0.00311494
150	0.00282755	0.00317154
150.24	0.00268531	0.00322393
150.48	0.00276125	0.00339713
150.72	0.00271091	0.00317637
150.96	0.00298409	0.00317745
151.2	0.00288385	0.00329094
151.44	0.0028948	0.00313593
151.68	0.00303826	0.00313648
151.92	0.00276693	0.00316038
152.16	0.00300118	0.00326503
152.4	0.0028946	0.00330895
152.64	0.0026539	0.00309087
152.88	0.00283007	0.00307968
153.12	0.0029022	0.00302533
153.36	0.00277906	0.00314988
153.6	0.00291585	0.00311495
153.84	0.00276622	0.00323303
154.08	0.00267898	0.00315711
154.32	0.00298025	0.00312685
154.56	0.00299809	0.00324358
154.8	0.00264785	0.0031346
155.04	0.00285619	0.00308225
155.28	0.00259068	0.0032829
155.52	0.00283989	0.00308831
155.76	0.00246028	0.00314314
156	0.00310988	0.00307072
156.24	0.00278074	0.00298451
156.48	0.0025835	0.00339755
156.72	0.00266751	0.00304059
156.96	0.00278053	0.00313075
157.2	0.0027028	0.00323801
157.44	0.00274234	0.00324232
157.68	0.0027696	0.00319879
157.92	0.00301162	0.00315454
158.16	0.00274421	0.00303156
158.4	0.00282471	0.0031193
158.64	0.00268895	0.00304098
158.88	0.00272268	0.00304382
159.12	0.00280889	0.0031128
159.36	0.00271638	0.003052
159.6	0.00261792	0.00301415
159.84	0.00278026	0.00319208
160.08	0.00262768	0.0028756
160.32	0.00268155	0.00297403
160.56	0.00275952	0.0030063
160.8	0.00265657	0.00315676
161.04	0.00298589	0.00287017
161.28	0.00275346	0.00307624
161.52	0.00264529	0.00317339
161.76	0.00282324	0.00305398
162	0.00243826	0.00300735
162.24	0.0029531	0.00313177
162.48	0.00273592	0.00323068
162.72	0.00281853	0.00312422
162.96	0.0028774	0.00313589
163.2	0.00273518	0.00314497
163.44	0.00295127	0.00288475
163.68	0.00250162	0.0030674
163.92	0.00268088	0.00295322
164.16	0.00238477	0.00294851
164.4	0.0026927	0.00316769
164.64	0.00248674	0.00317086
164.88	0.00270371	0.00293539
165.12	0.00255121	0.00299593
165.36	0.0026234	0.00286334
165.6	0.00249668	0.00306653
165.84	0.00262125	0.00286419
166.08	0.00243943	0.00314536
166.32	0.00277439	0.00298984
166.56	0.00237748	0.0030234
166.8	0.00274588	0.00290493
167.04	0.00249989	0.00281731
167.28	0.00261753	0.0028836
167.52	0.00261091	0.00296673
167.76	0.00225563	0.00286186
168	0.00240716	0.00313145
168.24	0.00282233	0.00285049
168.48	0.0025781	0.00307463
168.72	0.00274281	0.00299161
168.96	0.00237958	0.00306257
169.2	0.00227741	0.0031235
169.44	0.00232746	0.00274877
169.68	0.0025147	0.00277349
169.92	0.0026105	0.00306889
170.16	0.00250306	0.00306517
170.4	0.0026661	0.00289631
170.64	0.00234204	0.00284707
170.88	0.00241555	0.00301889
171.12	0.00249551	0.00286556
171.36	0.00255886	0.00285703
171.6	0.00242709	0.00277445
171.84	0.00258933	0.00294247
172.08	0.00269834	0.00300127
172.32	0.00235977	0.00265301
172.56	0.00238222	0.00285078
172.8	0.00229658	0.00281156
173.04	0.00249716	0.00291729
173.28	0.00236029	0.00326611
173.52	0.00229603	0.00272532
173.76	0.0023394	0.00297221
174	0.00265967	0.00276212
174.24	0.00241148	0.00259745
174.48	0.00237388	0.00292373
174.72	0.00249298	0.00260539
174.96	0.00246898	0.00297443
175.2	0.00225871	0.0027098
175.44	0.00270191	0.00276075
175.68	0.00249462	0.00271393
175.92	0.00267237	0.00282695
176.16	0.00252597	0.00289996
176.4	0.00244922	0.00277879
176.64	0.00258699	0.00267009
176.88	0.00251149	0.00292229
177.12	0.00249059	0.00301582
177.36	0.00224089	0.00269459
177.6	0.00247866	0.00261276
177.84	0.0024163	0.00289693
178.08	0.00229693	0.00284536
178.32	0.00239744	0.00273627
178.56	0.00243464	0.00274152
178.8	0.00223093	0.00268911
179.04	0.0022043	0.00275226
179.28	0.00229319	0.00273389
179.52	0.00252166	0.00271126
179.76	0.00239382	0.00257989
180	0.00240059	0.00286984
180.24	0.00243055	0.00269124
180.48	0.00236027	0.00250901
180.72	0.00208985	0.00288726
180.96	0.00255182	0.00260985
181.2	0.00254857	0.00272426
181.44	0.00236026	0.00279975
181.68	0.00257794	0.00282069
181.92	0.00226372	0.00273344
182.16	0.00208696	0.00262311
182.4	0.002154	0.00277617
182.64	0.00226997	0.00286354
182.88	0.00216604	0.00267563
183.12	0.00244323	0.00272
183.36	0.00228576	0.00266415
183.6	0.00257885	0.00261806
183.84	0.00216421	0.00251737
184.08	0.00237023	0.00284492
184.32	0.00214696	0.0026537
184.56	0.00238651	0.0027659
184.8	0.00219748	0.00268574
185.04	0.00238599	0.00264664
185.28	0.00216402	0.00250962
185.52	0.00233974	0.00259384
185.76	0.00197913	0.00267392
186	0.00216848	0.00255407
186.24	0.00233819	0.00263337
186.48	0.00241282	0.00256253
186.72	0.00207705	0.00256348
186.96	0.00225554	0.00249443
187.2	0.00217032	0.00263451
187.44	0.00216506	0.00268905
187.68	0.00218458	0.00272622
187.92	0.0022518	0.00248928
188.16	0.0022344	0.00275889
188.4	0.00213962	0.00251869
188.64	0.00217326	0.00251452
188.88	0.00218594	0.00254843
189.12	0.00233182	0.00263263
189.36	0.00210643	0.00240589
189.6	0.00199506	0.0024487
189.84	0.0019557	0.00270293
190.08	0.00214675	0.00257053
190.32	0.00222276	0.00263705
190.56	0.0021468	0.00251781
190.8	0.00198728	0.00261828
191.04	0.00224797	0.00268971
191.28	0.00207971	0.0026252
191.52	0.00214156	0.00249039
191.76	0.00210783	0.00250272
192	0.00186938	0.00280378
192.24	0.0020597	0.00244159
192.48	0.00209178	0.00255433
192.72	0.00202684	0.00270083
192.96	0.00215035	0.00228813
193.2	0.0019287	0.00263556
193.44	0.00197626	0.00263763
193.68	0.00233015	0.00266798
193.92	0.00198098	0.00277617
194.16	0.00222502	0.00251445
194.4	0.00227089	0.00255222
194.64	0.00220183	0.00252297
194.88	0.001903	0.00257713
195.12	0.00207923	0.0024354
195.36	0.00187526	0.00249066
195.6	0.00218326	0.00260591
195.84	0.00223071	0.0026836
196.08	0.00204005	0.00223747
196.32	0.002301	0.00251314
196.56	0.00209401	0.00255751
196.8	0.00226713	0.00224077
197.04	0.00189373	0.00236242
197.28	0.00182587	0.0023916
197.52	0.00199417	0.0025374
197.76	0.00191095	0.00214334
198	0.00191334	0.00248102
198.24	0.00229402	0.00260694
198.48	0.00187086	0.00259197
198.72	0.00185466	0.00257571
198.96	0.00210392	0.00250949
199.2	0.00211891	0.00255332
199.44	0.00196593	0.00234874
199.68	0.00217764	0.00243185
199.92	0.00196975	0.00228574
200.16	0.0018165	0.00226876
200.4	0.00199052	0.00247045
200.64	0.00185269	0.00249059
200.88	0.00215041	0.00230078
201.12	0.00181705	0.00239589
201.36	0.00194669	0.00222841
201.6	0.00218315	0.00220262
201.84	0.00170673	0.00213912
202.08	0.0021322	0.00265262
202.32	0.00198683	0.00230847
202.56	0.00185716	0.00240478
202.8	0.00187149	0.00242122
203.04	0.00196513	0.00230653
203.28	0.00187782	0.00230535
203.52	0.00186513	0.00250015
203.76	0.00173347	0.0022609
204	0.00194998	0.00223465
204.24	0.00182254	0.00236411
204.48	0.00171214	0.00236405
204.72	0.00190312	0.00235491
204.96	0.00212994	0.00229137
205.2	0.00183868	0.00227179
205.44	0.00187236	0.00220625
205.68	0.00196281	0.00240083
205.92	0.00187711	0.00238551
206.16	0.00155576	0.00221975
206.4	0.00165773	0.00222596
206.64	0.00189976	0.0022218
206.88	0.00187805	0.00204055
207.12	0.00188099	0.00208363
207.36	0.00183942	0.00219151
207.6	0.00186568	0.00243452
207.84	0.00141098	0.00242092
208.08	0.00146005	0.0022575
208.32	0.00182962	0.00224635
208.56	0.0015534	0.00225722
208.8	0.00196552	0.00208777
209.04	0.00194717	0.00238431
209.28	0.00173504	0.00189971
209.52	0.00205842	0.00235716
209.76	0.00169811	0.00221549
210	0.00178228	0.00221875
210.24	0.00169811	0.00216202
210.48	0.0017226	0.00206317
210.72	0.00193543	0.00223185
210.96	0.00193933	0.0022599
211.2	0.00178809	0.0021305
211.44	0.0019984	0.00217899
211.68	0.0015998	0.00215417
211.92	0.00169727	0.00214707
212.16	0.00161738	0.00221512
212.4	0.00170496	0.00208384
212.64	0.00173666	0.00200653
212.88	0.00147351	0.00210682
213.12	0.00172146	0.00213101
213.36	0.00219645	0.00222544
213.6	0.00191165	0.00215501
213.84	0.00167895	0.00221058
214.08	0.00138375	0.00204005
214.32	0.00188075	0.00203073
214.56	0.00168651	0.00195275
214.8	0.00129704	0.00219192
215.04	0.00159879	0.0020208
215.28	0.00162886	0.00193053
215.52	0.00182445	0.00217423
215.76	0.00124289	0.00213728
216	0.0016735	0.00229055
216.24	0.00173502	0.00226085
216.48	0.00194303	0.00202218
216.72	0.0015079	0.00197805
216.96	0.00167265	0.00217558
217.2	0.00143156	0.00208445
217.44	0.00165305	0.00193881
217.68	0.00184119	0.0020095
217.92	0.00173814	0.00227917
218.16	0.00161866	0.00214082
218.4	0.0016477	0.00204877
218.64	0.00162984	0.0020548
218.88	0.00157187	0.00225152
219.12	0.00149196	0.00204397
219.36	0.00162348	0.0021677
219.6	0.00175276	0.00202656
219.84	0.00169603	0.00199039
220.08	0.00162669	0.00198302
220.32	0.00168617	0.00210312
220.56	0.00142973	0.00221475
220.8	0.001581	0.00194032
221.04	0.00156783	0.00216533
221.28	0.00175557	0.00196195
221.52	0.00168166	0.00207729
221.76	0.00166088	0.00196891
222	0.00185024	0.0019859
222.24	0.00152036	0.00215847
222.48	0.00161922	0.00201259
222.72	0.0016535	0.00181697
222.96	0.00158479	0.00187774
223.2	0.00148761	0.00190286
223.44	0.00180101	0.00184767
223.68	0.00160373	0.00183784
223.92	0.00160001	0.0019704
224.16	0.00162424	0.00216069
224.4	0.00144758	0.0017697
224.64	0.00165374	0.00193642
224.88	0.0013617	0.00199193
225.12	0.00142581	0.00182644
225.36	0.00137207	0.00192394
225.6	0.00140964	0.00199971
225.84	0.00156952	0.00190031
226.08	0.00145475	0.00199861
226.32	0.00138342	0.00204174
226.56	0.00172874	0.00204138
226.8	0.00159533	0.00187021
227.04	0.0016	0.00199377
227.28	0.00137046	0.00174872
227.52	0.00157056	0.00203148
227.76	0.00133403	0.00182028
228	0.00156458	0.0020212
228.24	0.00140465	0.00184648
228.48	0.00163601	0.00182978
228.72	0.00140064	0.00196411
228.96	0.00186843	0.00184465
229.2	0.00149586	0.00199076
229.44	0.00114716	0.00195163
229.68	0.00126651	0.00180987
229.92	0.00146181	0.00176136
230.16	0.00133603	0.00186659
230.4	0.00171372	0.00180292
230.64	0.00151003	0.00188286
230.88	0.00138767	0.00189709
231.12	0.00139792	0.00211073
231.36	0.00124931	0.00181111
231.6	0.00117722	0.00177476
231.84	0.00128862	0.00170327
232.08	0.00117487	0.00191861
232.32	0.00127557	0.00180472
232.56	0.00155976	0.00181032
232.8	0.00171423	0.00181065
233.04	0.0015049	0.00182231
233.28	0.00130453	0.00168289
233.52	0.00179418	0.00192949
233.76	0.0015896	0.00192198
234	0.00125791	0.00179638
234.24	0.00135087	0.0016638
234.48	0.00155999	0.00176661
234.72	0.0013653	0.00179362
234.96	0.00134882	0.00180503
235.2	0.00119638	0.00175536
235.44	0.00133113	0.00170189
235.68	0.00141683	0.00175074
235.92	0.00168981	0.00184493
236.16	0.00149503	0.00159132
236.4	0.0014483	0.00168817
236.64	0.00123244	0.00192835
236.88	0.00136954	0.00148742
237.12	0.00150303	0.00157086
237.36	0.00144132	0.00170564
237.6	0.0012335	0.00164969
237.84	0.00128249	0.00173735
238.08	0.00140758	0.0018836
238.32	0.00142906	0.00180422
238.56	0.00148504	0.00187818
238.8	0.00152454	0.00185347
239.04	0.00122152	0.00159738
239.28	0.00108938	0.00192158
239.52	0.0011803	0.00177368
239.76	0.00123217	0.00169639
