# Supplementary material for: Complementary biosensors reveal different G-protein signaling modes triggered by GPCRs and non-receptor activators
Source: eLife. 2021 Mar 31;10:e65620. doi: 10.7554/eLife.65620 (PMC8034979; doi:10.7554/eLife.65620)
Supplement: Figure 3—source data 1. [file elife-65620-fig3-data1.xlsx]

## Sheet: Ctrl no GRK2ct
Time	no Rapa	plus Rapa
0	-0.01254	-0.02096
4	0.003083	-0.01594
8	-0.00205	0.00913
12	-0.00113	0.003768
16	-0.00271	0.002163
20	0.007308	0.000826
24	-0.00113	-0.00131
28	-0.00337	0.00136
32	-0.02336	-0.01196
36	-0.03334	-0.03661
40	-0.01802	-0.03097
44	-0.02011	-0.00824
48	-0.01097	-0.01315
52	0.001633	-0.00051
56	0.009556	0.005643
60	0.024706	0.011682
64	0.03783	0.014777
68	0.053216	0.031687
72	0.054301	0.044096
76	0.0645	0.057277
80	0.087414	0.080014
84	0.084655	0.074721
88	0.116775	0.083365
92	0.118459	0.097814
96	0.117898	0.100068
100	0.145607	0.112659
104	0.148886	0.134645
108	0.166516	0.152535
112	0.187221	0.155291
116	0.196561	0.164313
120	0.205652	0.161689
124	0.22456	0.196377
128	0.227085	0.202467
132	0.252068	0.221006
136	0.259762	0.229285
140	0.271894	0.233968
144	0.27692	0.241696
148	0.299005	0.262761
152	0.304874	0.26814
156	0.317445	0.285918
160	0.338575	0.28111
164	0.339519	0.299163
168	0.356119	0.319592
172	0.370298	0.322595
176	0.36854	0.334018
180	0.381843	0.349832
184	0.412795	0.364156
188	0.413775	0.365934
192	0.427217	0.376957
196	0.433146	0.395082
200	0.453537	0.403299
204	0.45804	0.419336
208	0.466239	0.420499
212	0.469259	0.435668
216	0.488658	0.4523
220	0.49239	0.452806
224	0.505165	0.467878
228	0.497831	0.476565
232	0.51819	0.495942
236	0.531298	0.488204
240	0.54101	0.505786
244	0.553563	0.514286
248	0.550418	0.516198
252	0.572183	0.528587
256	0.575538	0.54475
260	0.586345	0.554473
264	0.582441	0.559617
268	0.594889	0.559439
272	0.608308	0.564596
276	0.610283	0.587688
280	0.626695	0.592914
284	0.63177	0.598877
288	0.649263	0.596345
292	0.659902	0.59743
296	0.658799	0.603949
300	0.666532	0.623262
304	0.667639	0.641089
308	0.670964	0.641273
312	0.681154	0.645892
316	0.701117	0.647187
320	0.692139	0.658134
324	0.690832	0.648113
328	0.698494	0.657576
332	0.69812	0.673816
336	0.709756	0.6817
340	0.724863	0.684711
344	0.729226	0.689424
348	0.727518	0.688292
352	0.744278	0.689236
356	0.740076	0.712762
360	0.74983	0.710665
364	0.748297	0.711999
368	0.753474	0.722321
372	0.753666	0.713525
376	0.754435	0.739632
380	0.773534	0.721363
384	0.762903	0.733269
388	0.774115	0.73481
392	0.767728	0.740791
396	0.787918	0.755136
400	0.764832	0.732499
404	0.806327	0.746208
408	0.785385	0.744852
412	0.794559	0.754747
416	0.812432	0.762148
420	0.801416	0.762929
424	0.799455	0.765858
428	0.800828	0.775454
432	0.807508	0.774277
436	0.806721	0.772316
440	0.824097	0.78391
444	0.830649	0.790619
448	0.833434	0.774473
452	0.823106	0.788841
456	0.836023	0.792201
460	0.840013	0.797547
464	0.839015	0.803899
468	0.849216	0.790026
472	0.840612	0.795763
476	0.84461	0.793981
480	0.847412	0.817459
484	0.84461	0.813662
488	0.836621	0.810669
492	0.854836	0.811666
496	0.866928	0.825875
500	0.849416	0.805888
504	0.863293	0.814461
508	0.858457	0.815859
512	0.855841	0.831101
516	0.853631	0.81506
520	0.862083	0.826879
524	0.859866	0.820261
528	0.857652	0.810469
532	0.870163	0.8309
536	0.849617	0.840579
540	0.86713	0.830699
544	0.871175	0.841994
548	0.877257	0.825273
552	0.871175	0.831302
556	0.867332	0.835129
560	0.88071	0.83251
564	0.877663	0.832309
568	0.886614	0.845637
572	0.878475	0.83251
576	0.876851	0.844017
580	0.880507	0.834323
584	0.896624	0.843208
588	0.876445	0.845029
592	0.879694	0.8503
596	0.898468	0.851721
600	0.884984	0.859452
604	0.878678	0.851315
608	0.899493	0.849691
612	0.893964	0.859452
616	0.89192	0.845232
620	0.904624	0.850097
624	0.892942	0.842803
628	0.889266	0.855176
632	0.864908	0.839771
636	0.904213	0.860267
640	0.88641	0.846447
644	0.895192	0.854363
648	0.895806	0.845232
652	0.888245	0.879717
656	0.898468	0.857415
660	0.886614	0.85294
664	0.892533	0.860675
668	0.895806	0.869869
672	0.884984	0.860063
676	0.907708	0.854973
680	0.899698	0.869255
684	0.893351	0.849894
688	0.891716	0.864348
692	0.903186	0.851721
696	0.898468	0.85416
700	0.901954	0.866391
704	0.899493	0.852534
708	0.918225	0.846042
712	0.901544	0.868232
716	0.896624	0.870483
720	0.896215	0.863123
724	0.890695	0.868436
728	0.903597	0.85477
732	0.911208	0.874993
736	0.899698	0.869869
740	0.894987	0.871712
744	0.892738	0.875403
748	0.896624	0.868027
752	0.895396	0.868027
756	0.916779	0.864757
760	0.901954	0.868641
764	0.889878	0.860471
768	0.898263	0.868436
772	0.901133	0.864961
776	0.904624	0.85986
780	0.904624	0.883216
784	0.912857	0.867209
788	0.906268	0.877662
792	0.889266	0.859452
796	0.901133	0.867414
800	0.912239	0.880746
804	0.894373	0.874172
808	0.903186	0.855176
812	0.906885	0.854973
816	0.897444	0.880334
820	0.891716	0.864552
824	0.906268	0.861899
828	0.909354	0.857211
832	0.907502	0.866391
836	0.890082	0.867414
840	0.903597	0.869255
844	0.909972	0.861695
848	0.900518	0.892708
852	0.891512	0.862103
856	0.898058	0.864961
860	0.894373	0.871712
864	0.892738	0.866391
868	0.916986	0.872737
872	0.892329	0.863736
876	0.898263	0.858637
880	0.905035	0.848474
884	0.899083	0.865778
888	0.894578	0.874172
892	0.897648	0.854363
896	0.893964	0.866187
900	0.887837	0.858841
904	0.889062	0.855176
908	0.898058	0.857822
912	0.899698	0.863327
916	0.886614	0.860063
920	0.893351	0.864348
924	0.900313	0.864757
928	0.888857	0.838963
932	0.907914	0.872532
936	0.893964	0.862307
940	0.895192	0.865369
944	0.906268	0.849286
948	0.903802	0.85599
952	0.908119	0.845637
956	0.885188	0.863736
960	0.890899	0.858433
964	0.891307	0.858637
968	0.892942	0.849286
972	0.903391	0.860675
976	0.885595	0.84341
980	0.888857	0.848677
984	0.893351	0.860471
988	0.883151	0.852534
992	0.896215	0.858026
996	0.887634	0.859452
1000	0.887837	0.838357
1004	0.913889	0.862919
1008	0.876445	0.850097

## Sheet: GIV no GRK2ct
Time	no Rapa	plus Rapa
0	-0.02258	-0.03205
4	-0.00636	-0.0032
8	-0.00043	0.014545
12	-0.0011	-0.00068
16	0.000788	-0.00187
20	-0.0011	-0.00068
24	0.00715	-0.00386
28	0.001058	-0.00426
32	-0.00932	-0.0024
36	-0.03189	-0.03661
40	-0.01629	-0.03492
44	-0.02604	-0.02235
48	-0.01951	-0.01933
52	-0.01093	-0.01972
56	0.002275	-0.00426
60	0.003357	0.004518
64	0.011358	0.017497
68	0.03021	0.027866
72	0.034334	0.042781
76	0.043992	0.043326
80	0.046761	0.060565
84	0.06962	0.064556
88	0.080873	0.079493
92	0.087941	0.085056
96	0.079181	0.098195
100	0.105584	0.107193
104	0.108588	0.117935
108	0.120509	0.130165
112	0.135408	0.139175
116	0.14896	0.152265
120	0.146914	0.160365
124	0.161285	0.171414
128	0.174282	0.169228
132	0.179327	0.184288
136	0.201443	0.19459
140	0.195141	0.210893
144	0.203698	0.224334
148	0.221079	0.222088
152	0.242757	0.24816
156	0.239843	0.246643
160	0.255386	0.271052
164	0.267318	0.284607
168	0.275262	0.299814
172	0.284648	0.300905
176	0.29534	0.313727
180	0.309421	0.310748
184	0.329207	0.322373
188	0.330651	0.324738
192	0.33017	0.325054
196	0.338691	0.361515
200	0.34353	0.358946
204	0.35292	0.359909
208	0.371995	0.383162
212	0.379873	0.397506
216	0.39092	0.395871
220	0.395721	0.402748
224	0.397213	0.421365
228	0.425604	0.423518
232	0.427118	0.436983
236	0.43268	0.448021
240	0.450816	0.455581
244	0.444187	0.46013
248	0.454565	0.456423
252	0.474272	0.471124
256	0.463624	0.482177
260	0.475995	0.486444
264	0.479617	0.497407
268	0.494169	0.507566
272	0.493821	0.517081
276	0.515837	0.517601
280	0.501134	0.530824
284	0.524638	0.528208
288	0.535249	0.53992
292	0.53933	0.538343
296	0.545913	0.554874
300	0.550194	0.542025
304	0.55502	0.55558
308	0.568304	0.575455
312	0.578774	0.57118
316	0.558064	0.584925
320	0.576604	0.596058
324	0.579136	0.575633
328	0.596766	0.597139
332	0.601151	0.600023
336	0.608846	0.611054
340	0.610131	0.613594
344	0.604628	0.617227
348	0.607378	0.619593
352	0.614359	0.631458
356	0.617673	0.618137
360	0.628945	0.640446
364	0.621547	0.635672
368	0.638042	0.644678
372	0.641021	0.64063
376	0.648112	0.66002
380	0.64419	0.643389
384	0.66086	0.652428
388	0.667639	0.667453
392	0.668016	0.667639
396	0.644937	0.652982
400	0.676522	0.643021
404	0.681262	0.690283
408	0.688295	0.681834
412	0.684681	0.678276
416	0.684681	0.678651
420	0.70109	0.693295
424	0.688486	0.687275
428	0.692488	0.682958
432	0.693442	0.685585
436	0.689057	0.685397
440	0.710303	0.683146
444	0.711842	0.701599
448	0.708957	0.683146
452	0.702814	0.684084
456	0.71011	0.692541
460	0.717238	0.698953
464	0.724969	0.697443
468	0.720713	0.686899
472	0.723614	0.690847
476	0.73331	0.696688
480	0.737396	0.6916
484	0.734866	0.687651
488	0.754009	0.697066
492	0.730009	0.672858
496	0.736033	0.691976
500	0.748131	0.678089
504	0.738759	0.681459
508	0.738175	0.68859
512	0.752244	0.681646
516	0.731562	0.681834
520	0.747544	0.692541
524	0.752244	0.687463
528	0.747349	0.682021
532	0.745589	0.68071
536	0.752832	0.671366
540	0.754401	0.677715
544	0.752636	0.679212
548	0.75774	0.683708
552	0.759902	0.660577
556	0.753813	0.662619
560	0.75715	0.670806
564	0.774705	0.66299
568	0.775695	0.672671
572	0.753617	0.657425
576	0.75774	0.656498
580	0.765811	0.663362
584	0.758722	0.661319
588	0.780455	0.662619
592	0.773319	0.653907
596	0.766206	0.664291
600	0.766995	0.65798
604	0.78423	0.66169
608	0.765811	0.655017
612	0.770748	0.642653
616	0.783634	0.651873
620	0.78622	0.652428
624	0.780653	0.632556
628	0.767192	0.647074
632	0.780256	0.646705
636	0.767982	0.637691
640	0.781646	0.645599
644	0.767587	0.637691
648	0.776488	0.632556
652	0.781646	0.645599
656	0.784628	0.643205
660	0.796794	0.631275
664	0.797795	0.624696
668	0.786817	0.637691
672	0.780455	0.629445
676	0.795995	0.633472
680	0.774111	0.633656
684	0.786618	0.628531
688	0.783832	0.643942
692	0.789207	0.625973
696	0.783435	0.638241
700	0.789008	0.638609
704	0.799997	0.640998
708	0.777677	0.631458
712	0.764825	0.629811
716	0.800998	0.627617
720	0.780653	0.616682
724	0.779462	0.633472
728	0.786021	0.632007
732	0.774705	0.623419
736	0.793397	0.607612
740	0.781448	0.633472
744	0.796594	0.631275
748	0.787016	0.622507
752	0.793597	0.627617
756	0.792598	0.620503
760	0.782242	0.611779
764	0.787614	0.618319
768	0.797795	0.619957
772	0.78622	0.616318
776	0.783435	0.612142
780	0.778074	0.614138
784	0.780256	0.600744
788	0.789606	0.605983
792	0.782441	0.595158
796	0.776289	0.616137
800	0.786419	0.614502
804	0.779462	0.613231
808	0.783236	0.612142
812	0.768179	0.608879
816	0.78841	0.618137
820	0.801399	0.612505
824	0.785225	0.598761
828	0.783037	0.597679
832	0.788211	0.595158
836	0.777677	0.60906
840	0.782242	0.603453
844	0.78105	0.611961
848	0.775893	0.61051
852	0.777479	0.594798
856	0.771736	0.600925
860	0.780256	0.600023
864	0.785225	0.61051
868	0.794995	0.595878
872	0.779661	0.590125
876	0.78622	0.594978
880	0.769562	0.599482
884	0.770352	0.603995
888	0.791202	0.592281
892	0.76976	0.612868
896	0.784628	0.614683
900	0.775101	0.591562
904	0.75244	0.583493
908	0.782441	0.610873
912	0.785026	0.595158
916	0.781448	0.57706
920	0.767982	0.613049
924	0.763643	0.613412
928	0.774507	0.59858
932	0.767785	0.600564
936	0.779264	0.578845
940	0.774705	0.601647
944	0.762658	0.58869
948	0.775497	0.587614
952	0.770748	0.620321
956	0.785623	0.601466
960	0.78105	0.593539
964	0.7666	0.607974
968	0.773319	0.592461
972	0.770748	0.596779
976	0.769167	0.590125
980	0.760493	0.579381
984	0.775299	0.586717
988	0.772725	0.595338
992	0.751852	0.58869
996	0.768969	0.590305
1000	0.767982	0.591023
1004	0.758722	0.574742
1008	0.756561	0.597319

## Sheet: Ctrl plus GRK2ct
Time	no Rapa	plus Rapa
0	-0.01426	-0.0245
4	-0.00504	-0.00759
8	-0.00354	-0.00413
12	0.002178	0.002261
16	0.002042	0.003195
20	0.001224	-0.00467
24	-0.00232	0.003596
28	0.005455	0.00734
32	-0.00341	-0.00174
36	-0.00884	-0.01963
40	-0.00979	-0.02253
44	-0.00245	-0.01593
48	0.011204	0.002528
52	0.016421	0.004665
56	0.027452	0.014985
60	0.041473	0.024282
64	0.051533	0.0407
68	0.070967	0.045887
72	0.072383	0.058779
76	0.075218	0.064707
80	0.101361	0.0794
84	0.113918	0.096456
88	0.126703	0.109563
92	0.130643	0.116364
96	0.150466	0.128467
100	0.162459	0.148573
104	0.172585	0.150595
108	0.187273	0.165395
112	0.203437	0.172399
116	0.222798	0.185749
120	0.223565	0.204537
124	0.232321	0.212731
128	0.24995	0.22847
132	0.271819	0.233142
136	0.285373	0.259878
140	0.291868	0.261102
144	0.312121	0.26877
148	0.326598	0.280328
152	0.327567	0.287451
156	0.348512	0.300056
160	0.370336	0.3107
164	0.372978	0.323771
168	0.374795	0.346174
172	0.384076	0.337883
176	0.400251	0.370933
180	0.418412	0.376765
184	0.422639	0.380988
188	0.43418	0.385545
192	0.454707	0.407663
196	0.45505	0.408817
200	0.470582	0.422212
204	0.496027	0.429526
208	0.497079	0.438704
212	0.503229	0.456343
216	0.504285	0.45972
220	0.514166	0.464965
224	0.516644	0.481294
228	0.540865	0.491394
232	0.551279	0.493283
236	0.550379	0.48591
240	0.572081	0.521296
244	0.570991	0.505168
248	0.583015	0.528795
252	0.604869	0.536672
256	0.593271	0.540358
260	0.611894	0.553223
264	0.61245	0.562079
268	0.622289	0.55022
272	0.633483	0.581338
276	0.651326	0.593555
280	0.644359	0.586719
284	0.653401	0.591754
288	0.662292	0.600593
292	0.660587	0.597161
296	0.667036	0.612375
300	0.69668	0.614194
304	0.682286	0.622762
308	0.689951	0.638344
312	0.693024	0.631914
316	0.704782	0.628615
320	0.713108	0.645901
324	0.698606	0.653115
328	0.710975	0.667614
332	0.707876	0.647934
336	0.727511	0.657937
340	0.732789	0.667427
344	0.735139	0.669666
348	0.742598	0.676398
352	0.745352	0.68804
356	0.751068	0.685594
360	0.747321	0.699934
364	0.747124	0.689358
368	0.758778	0.702207
372	0.767907	0.701639
376	0.77967	0.703155
380	0.776274	0.70885
384	0.768304	0.717803
388	0.773282	0.70904
392	0.778071	0.722963
396	0.778271	0.729861
400	0.794512	0.71723
404	0.808238	0.718949
408	0.798137	0.72258
412	0.792501	0.724302
416	0.805607	0.731397
420	0.821029	0.726026
424	0.815742	0.737745
428	0.811885	0.724111
432	0.826126	0.728135
436	0.827759	0.736204
440	0.822659	0.741986
444	0.811277	0.749913
448	0.821029	0.746816
452	0.820215	0.763319
456	0.813914	0.740057
460	0.818181	0.744303
464	0.830415	0.773084
468	0.830211	0.753402
472	0.835943	0.75923
476	0.843334	0.751463
480	0.84745	0.739479
484	0.838609	0.757869
488	0.850336	0.765073
492	0.848068	0.758258
496	0.850336	0.769563
500	0.854052	0.768196
504	0.848893	0.765268
508	0.832461	0.781909
512	0.860881	0.761371
516	0.853639	0.766048
520	0.848068	0.780927
524	0.863784	0.779356
528	0.871266	0.776414
532	0.86586	0.783089
536	0.859845	0.780338
540	0.847038	0.777394
544	0.859638	0.790178
548	0.862332	0.772692
552	0.862124	0.777198
556	0.867938	0.782499
560	0.853019	0.78132
564	0.877729	0.789192
568	0.876059	0.789192
572	0.873974	0.789784
576	0.859223	0.778179
580	0.864406	0.782499
584	0.862954	0.775238
588	0.850749	0.782499
592	0.871266	0.796499
596	0.868353	0.79927
600	0.878146	0.79472
604	0.878146	0.794127
608	0.881071	0.78939
612	0.872932	0.803434
616	0.870433	0.786237
620	0.882117	0.778767
624	0.885047	0.793732
628	0.892179	0.786631
632	0.885257	0.792547
636	0.876059	0.79077
640	0.891339	0.792152
644	0.885466	0.794522
648	0.887352	0.782106
652	0.884628	0.787419
656	0.871474	0.783875
660	0.881071	0.792152
664	0.86773	0.780338
668	0.880026	0.785056
672	0.870017	0.791757
676	0.877729	0.800856
680	0.884419	0.798874
684	0.869393	0.792349
688	0.876685	0.780731
692	0.890499	0.803632
696	0.882326	0.80145
700	0.877311	0.793337
704	0.879191	0.782106
708	0.883163	0.794522
712	0.876685	0.791954
716	0.874599	0.797093
720	0.878982	0.785646
724	0.877102	0.793139
728	0.875642	0.796302
732	0.878355	0.794325
736	0.892389	0.798874
740	0.871266	0.811783
744	0.875016	0.794917
748	0.88945	0.786434
752	0.89365	0.810987
756	0.883791	0.786434
760	0.888191	0.792744
764	0.883582	0.78132
768	0.884628	0.791757
772	0.885047	0.794917
776	0.886723	0.777982
780	0.880026	0.799667
784	0.876685	0.799667
788	0.91159	0.798874
792	0.880026	0.795708
796	0.878773	0.805022
800	0.875225	0.800657
804	0.89365	0.787813
808	0.875225	0.797885
812	0.882535	0.789981
816	0.870017	0.789981
820	0.88421	0.79077
824	0.883372	0.792349
828	0.880653	0.79077
832	0.882954	0.799865
836	0.878564	0.789784
840	0.879399	0.795906
844	0.879608	0.803037
848	0.87752	0.796895
852	0.86773	0.785253
856	0.887981	0.798082
860	0.882745	0.801054
864	0.871891	0.793337
868	0.867522	0.79828
872	0.871891	0.793534
876	0.89323	0.78604
880	0.87314	0.775042
884	0.896385	0.803434
888	0.886304	0.775826
892	0.880444	0.784269
896	0.874182	0.795511
900	0.870642	0.785056
904	0.868561	0.791954
908	0.857981	0.787616
912	0.885885	0.788601
916	0.882535	0.792152
920	0.883163	0.788798
924	0.890499	0.776806
928	0.857774	0.780534
932	0.87085	0.764098
936	0.86773	0.783875
940	0.874182	0.779749
944	0.858809	0.790376
948	0.875642	0.780338
952	0.875225	0.781909
956	0.876894	0.778964
960	0.871058	0.782499
964	0.855913	0.772497
968	0.866067	0.791954
972	0.874182	0.776022
976	0.86171	0.759619
980	0.877311	0.773279
984	0.869185	0.779356
988	0.87314	0.786828
992	0.861502	0.77759
996	0.869601	0.792349
1000	0.862747	0.765853
1004	0.855706	0.772301
1008	0.887981	0.774454

## Sheet: GIV plus GRK2ct
Time	no Rapa	plus Rapa
0	-0.02446	-0.03184
4	-0.00475	0.005069
8	0.001996	-0.00573
12	-0.0007	-0.00549
16	0.006916	-0.00414
20	0.000768	0.005439
24	-0.00058	0.000274
28	-0.00365	0.004577
32	0.002241	0.011483
36	0.003102	0.002854
40	0.009135	0.016308
44	0.00175	0.005562
48	0.007532	0.013585
52	0.018782	0.024754
56	0.021512	0.025875
60	0.033102	0.041516
64	0.04175	0.046551
68	0.06502	0.065559
72	0.065274	0.081041
76	0.077026	0.078216
80	0.091695	0.100161
84	0.103492	0.113719
88	0.125343	0.128566
92	0.128241	0.146065
96	0.140677	0.158362
100	0.156276	0.164407
104	0.164461	0.186879
108	0.180807	0.191106
112	0.197847	0.210732
116	0.206358	0.211421
120	0.221554	0.238532
124	0.229338	0.253577
128	0.245707	0.262208
132	0.262219	0.281452
136	0.270602	0.289204
140	0.281025	0.302776
144	0.295252	0.327275
148	0.305812	0.327862
152	0.316285	0.335953
156	0.331956	0.363871
160	0.349388	0.373468
164	0.355333	0.384624
168	0.379448	0.390378
172	0.382767	0.404837
176	0.399446	0.422947
180	0.401731	0.42897
184	0.413046	0.442783
188	0.430605	0.454499
192	0.439599	0.463449
196	0.445982	0.473706
200	0.460223	0.484174
204	0.478209	0.496457
208	0.482334	0.506403
212	0.491088	0.5122
216	0.492684	0.530019
220	0.509678	0.53458
224	0.5226	0.547997
228	0.533649	0.556057
232	0.544595	0.569451
236	0.543121	0.571111
240	0.554448	0.585273
244	0.570645	0.580597
248	0.557084	0.595498
252	0.581459	0.610338
256	0.589147	0.607294
260	0.59905	0.618139
264	0.602755	0.61678
268	0.606129	0.626481
272	0.615775	0.649294
276	0.631611	0.648259
280	0.639661	0.656896
284	0.636917	0.658801
288	0.642752	0.665222
292	0.654126	0.674279
296	0.657066	0.681974
300	0.663305	0.695155
304	0.670259	0.697448
308	0.67549	0.707001
312	0.694079	0.710372
316	0.702904	0.718379
320	0.692494	0.716063
324	0.712122	0.724985
328	0.719775	0.7361
332	0.72388	0.737179
336	0.72531	0.740419
340	0.738581	0.743483
344	0.740561	0.755241
348	0.737322	0.765423
352	0.761188	0.77547
356	0.74886	0.774555
360	0.760824	0.772543
364	0.75937	0.774372
368	0.761006	0.776203
372	0.771211	0.793676
376	0.771759	0.792383
380	0.793061	0.797188
384	0.778714	0.807199
388	0.781099	0.801632
392	0.7962	0.8033
396	0.803235	0.818379
400	0.803235	0.820996
404	0.804904	0.809989
408	0.814389	0.817445
412	0.816813	0.832247
416	0.814389	0.810919
420	0.822606	0.837329
424	0.821857	0.832435
428	0.821296	0.845447
432	0.834237	0.843556
436	0.835366	0.841667
440	0.826538	0.843367
444	0.835742	0.840723
448	0.849716	0.839968
452	0.846309	0.850939
456	0.847444	0.840157
460	0.853698	0.858157
464	0.845363	0.85075
468	0.854647	0.861966
472	0.864543	0.862919
476	0.867788	0.865781
480	0.863399	0.848854
484	0.872378	0.865017
488	0.880625	0.865208
492	0.881393	0.852836
496	0.871612	0.869029
500	0.873718	0.868646
504	0.896244	0.871899
508	0.879472	0.872856
512	0.89006	0.868264
516	0.893343	0.871325
520	0.888517	0.889198
524	0.896244	0.894028
528	0.890832	0.871707
532	0.894503	0.883417
536	0.89818	0.879571
540	0.91256	0.869411
544	0.894696	0.89055
548	0.907886	0.875156
552	0.90361	0.893255
556	0.914901	0.891902
560	0.91334	0.903331
564	0.914315	0.893061
568	0.906525	0.888619
572	0.919394	0.884764
576	0.925465	0.894608
580	0.91412	0.890936
584	0.931749	0.893835
588	0.926053	0.894802
592	0.92998	0.906052
596	0.927034	0.892095
600	0.921155	0.893255
604	0.923113	0.889391
608	0.933323	0.908192
612	0.942394	0.894995
616	0.922917	0.905468
620	0.937854	0.896931
624	0.934307	0.898868
628	0.934701	0.902942
632	0.947934	0.909944
636	0.942789	0.905274
640	0.940419	0.915796
644	0.942987	0.913453
648	0.940814	0.912478
652	0.958656	0.900807
656	0.945558	0.907024
660	0.953288	0.913258
664	0.95309	0.908776
668	0.954083	0.905857
672	0.942987	0.896544
676	0.959851	0.905663
680	0.9517	0.912478
684	0.949915	0.907608
688	0.956269	0.909749
692	0.961843	0.913258
696	0.952693	0.927939
700	0.961046	0.912673
704	0.966633	0.919902
708	0.960449	0.92578
712	0.95448	0.913649
716	0.964835	0.902942
720	0.961046	0.911503
724	0.965434	0.922447
728	0.975841	0.913258
732	0.971232	0.913453
736	0.972233	0.916187
740	0.965434	0.915796
744	0.972033	0.915015
748	0.966033	0.910139
752	0.979253	0.908581
756	0.966233	0.919706
760	0.972633	0.91521
764	0.956866	0.912478
768	0.983073	0.911698
772	0.975239	0.916773
776	0.983878	0.923035
780	0.967432	0.924211
784	0.975439	0.903719
788	0.976844	0.925387
792	0.968631	0.936203
796	0.983878	0.914039
800	0.973234	0.929511
804	0.980057	0.915796
808	0.981665	0.912088
812	0.973435	0.926172
816	0.963439	0.925387
820	0.982671	0.917164
824	0.966832	0.915991
828	0.986497	0.917946
832	0.968431	0.929511
836	0.971832	0.924211
840	0.988513	0.919706
844	0.988312	0.928725
848	0.977044	0.913649
852	0.990531	0.916968
856	0.977044	0.924603
860	0.984281	0.926761
864	0.996799	0.929904
868	0.980861	0.924407
872	0.977044	0.919315
876	0.983073	0.935612
880	0.985288	0.91951
884	0.986094	0.932264
888	0.989724	0.918728
892	0.983878	0.914429
896	0.978851	0.918728
900	0.992551	0.921663
904	0.977647	0.916968
908	0.998014	0.93069
912	0.992551	0.933248
916	0.978651	0.926957
920	0.967632	0.923819
924	0.989724	0.931871
928	0.982067	0.918923
932	0.982067	0.926565
936	0.969231	0.914234
940	0.990329	0.918728
944	0.990128	0.922055
948	0.990935	0.923427
952	0.994775	0.924407
956	0.98932	0.913258
960	0.991541	0.915601
964	0.991541	0.935021
968	1.01244	0.929904
972	1.00187	0.923231
976	0.999838	0.924015
980	0.983275	0.926761
984	1.00329	0.925191
988	0.990531	0.925387
992	0.987303	0.936597
996	1.00024	0.923035
1000	0.998217	0.915601
1004	1.00004	0.930297
1008	1.00532	0.929707

## Sheet: Bar Graph
		Exp1	Exp2	Exp3	Exp4
-GRK2ct		-25.4574	-23.0479	-18.8911	-24.1638
+GRK2ct		-11.8578	-8.28754	-9.4489	-2.71408
