# Supplementary material for: Complementary biosensors reveal different G-protein signaling modes triggered by GPCRs and non-receptor activators
Source: eLife. 2021 Mar 31;10:e65620. doi: 10.7554/eLife.65620 (PMC8034979; doi:10.7554/eLife.65620)
Supplement: Figure 4—source data 1. [file elife-65620-fig4-data1.xlsx]

## Sheet: GIV
	Nucleotide depleted				plus GTP
Time	Exp1	Exp2	Exp3		Exp1	Exp2	Exp3
0	-4.4e-05	-7.6e-05	-0.00015576		-0.0001898	-0.00012	0.000252
0.24	0.000266	-5.8e-06	-0.00021576		0.00013016	-7.04e-05	7.19e-05
0.48	-0.00029	0.000194	-6.576e-05		-0.0001998	-4e-07	-8.8e-05
0.72	-0.00018	1.42e-05	-8.576e-05		-2.984e-05	-9.04e-05	0.000102
0.96	-3.4e-05	-3.6e-05	-0.00035576		-0.0003298	-8.04e-05	5.19e-05
1.2	0.000186	0.000114	-1.576e-05		-6.984e-05	0.00019	0.000142
1.44	0.000256	0.000214	-0.00012576		0.00021016	-0.00048	5.19e-05
1.68	0.000166	0.000114	-0.00022576		-0.0001998	0.00025	7.19e-05
1.92	-0.00023	0.000224	-0.00031576		2.016e-05	5.96e-05	0.000132
2.16	3.6e-05	0.000164	-0.00012576		-0.0003298	5.96e-05	0.000182
2.4	6.6e-05	0.000134	-0.00020576		-9.84e-06	-1.04e-05	0.000222
2.64	9.6e-05	3.42e-05	-0.00028576		-0.0001298	9.96e-05	4.19e-05
2.88	9.6e-05	3.42e-05	-7.576e-05		-5.984e-05	0.00035	7.19e-05
3.12	-0.00017	3.42e-05	-0.00028576		-2.984e-05	-4.04e-05	0.000102
3.36	-0.0001	0.000234	-0.00051576		0.00012016	-0.00013	6.19e-05
3.6	0.000306	-5.6e-05	-0.00017576		0.00012016	-0.00015	0.000102
3.84	-5.4e-05	0.000124	-0.00018576		7.016e-05	-9.04e-05	-0.00019
4.08	-0.00018	-5.8e-06	-6.576e-05		0.00033016	1.96e-05	6.19e-05
4.32	0.000176	0.000144	-0.00027576		-7.984e-05	-5.04e-05	-2.8e-05
4.56	-0.00011	4.24e-06	-0.00011576		-1.984e-05	1.96e-05	0.000132
4.8	6e-06	0.000274	-0.00023576		-2.984e-05	9.6e-06	0.000232
5.04	-2.4e-05	0.000124	-5.76e-06		-9.984e-05	3.96e-05	-0.00013
5.28	1.6e-05	-4.6e-05	-0.00021576		0.00011016	-0.00012	-5.8e-05
5.52	0.000286	1.42e-05	-0.00025576		0.00032016	-7.04e-05	-1.8e-05
5.76	-0.0003	7.42e-05	-0.00011576		0.00036016	9.6e-06	6.19e-05
6	-0.00013	1.42e-05	-0.00019576		-9.84e-06	0.00029	2.19e-05
6.24	0.000116	4.24e-06	-0.00037576		-0.0001198	-0.00014	7.19e-05
6.48	-0.00013	-2.6e-05	-0.00011576		0.00023016	0.00019	-2.8e-05
6.72	6e-06	-1.6e-05	-0.00019576		0.00011016	4.96e-05	0.000172
6.96	-9.4e-05	-0.00017	-4.576e-05		-0.0001298	8.96e-05	0.000152
7.2	0.000106	-0.00029	-0.00037576		-4.984e-05	-4.04e-05	-2.8e-05
7.44	-2.4e-05	-7.6e-05	-0.00016576		7.016e-05	-3.04e-05	0.000232
7.68	-3.4e-05	-9.6e-05	-0.00014576		-0.0001698	6.96e-05	-7.8e-05
7.92	-5.4e-05	-1.6e-05	-0.00032576		-0.0001398	-2.04e-05	-2.8e-05
8.16	6.6e-05	-5.6e-05	-0.00015576		-0.0001198	-4e-07	-8.1e-06
8.4	7.6e-05	5.42e-05	-0.00020576		-0.0002998	0.00012	-4.8e-05
8.64	3.6e-05	0.000114	-0.00023576		-9.84e-06	-5.04e-05	1.19e-05
8.88	5.6e-05	3.42e-05	-0.00017576		0.00011016	-0.00023	-9.8e-05
9.12	-2.4e-05	-0.0002	-0.00030576		-5.984e-05	-1.04e-05	0.000132
9.36	-4.4e-05	-1.6e-05	-0.00035576		-3.984e-05	3.96e-05	9.19e-05
9.6	-4.4e-05	-3.6e-05	-0.00034576		-5.984e-05	-2.04e-05	1.19e-05
9.84	0.000136	0.000154	-0.00022576		0.00020016	-0.00023	-3.8e-05
10.08	-1.4e-05	2.42e-05	-0.00020576		-7.984e-05	8.96e-05	0.000162
10.32	7.6e-05	0.000124	3.424e-05		0.00016016	-0.0002	-2.8e-05
10.56	0.000206	0.000224	-0.00017576		0.00036016	7.96e-05	-1.8e-05
10.8	-9.4e-05	-5.8e-06	-0.00020576		-7.984e-05	-0.00022	5.19e-05
11.04	-0.00015	0.000174	-0.00040576		-0.0001398	-0.00016	0.000102
11.28	6.6e-05	-4.6e-05	-0.00031576		8.016e-05	0.00027	-0.00016
11.52	-0.00012	0.000174	-0.00024576		0.00018016	-0.00012	0.000112
11.76	-9.4e-05	6.42e-05	-0.00024576		-4.984e-05	-2.04e-05	5.19e-05
12	-0.00013	8.42e-05	-7.576e-05		0.00015016	-0.0001	0.000102
12.24	8.6e-05	-2.6e-05	-0.00020576		-9.984e-05	0.00013	3.19e-05
12.48	-0.00021	-4.6e-05	-0.00025576		0.00015016	-3.04e-05	-7.8e-05
12.72	0.000196	-8.6e-05	-0.00024576		-1.984e-05	8.96e-05	-3.8e-05
12.96	0.000296	-3.6e-05	-0.00022576		-0.0001598	0.00014	0.000112
13.2	1.6e-05	0.000154	-0.00039576		-0.0003198	-0.00018	1.19e-05
13.44	0.000126	-0.00017	-0.00037576		-0.0001298	4.96e-05	9.19e-05
13.68	0.000106	0.000174	-0.00024576		-3.984e-05	-0.00025	-0.00016
13.92	7.6e-05	1.42e-05	-0.00023576		3.016e-05	0.00013	-0.00017
14.16	0.000246	0.000224	-0.00035576		0.00037016	-8.04e-05	-7.8e-05
14.4	7.6e-05	-0.00016	-0.00019576		0.00024016	9.96e-05	6.19e-05
14.64	-0.00015	-7.6e-05	-0.00029576		0.00034016	4.96e-05	0.000242
14.88	0.000186	-0.00021	-0.00031576		-0.0003398	-2.04e-05	0.000122
15.12	4.6e-05	-5.8e-06	-0.00025576		0.00010016	1.96e-05	-9.8e-05
15.36	3.6e-05	-1.6e-05	-0.00017576		3.016e-05	6.96e-05	0.000122
15.6	0.000186	-5.6e-05	-0.00033576		7.016e-05	-1.04e-05	-0.00021
15.84	-0.00012	-8.6e-05	-0.00014576		0.00020016	-7.04e-05	0.000142
16.08	0.000196	3.42e-05	-0.00021576		-3.984e-05	-2.04e-05	5.19e-05
16.32	1.6e-05	-6.6e-05	-0.00027576		0.00012016	4.96e-05	-8.1e-06
16.56	-7.4e-05	7.42e-05	-0.00018576		-1.984e-05	-4e-07	-6.8e-05
16.8	-2.4e-05	5.42e-05	-0.00039576		3.016e-05	0.00011	-0.00013
17.04	5.6e-05	4.24e-06	-0.00030576		0.00019016	-0.0001	0.000152
17.28	-6.4e-05	-0.00027	-0.00029576		-1.984e-05	-0.00029	1.19e-05
17.52	0.000106	0.000214	-0.00016576		-0.0001198	9.96e-05	-0.00011
17.76	-8.4e-05	-0.00011	-0.00032576		0.00012016	-7.04e-05	-0.00015
18	0.000226	-1.6e-05	-0.00035576		-0.0001898	0.00018	5.19e-05
18.24	-0.00011	7.42e-05	-0.00029576		0.00026016	6.96e-05	-7.8e-05
18.48	-0.0002	0.000204	-0.00023576		-0.0001498	0.00033	0.000112
18.72	2.6e-05	5.42e-05	-0.00025576		0.00013016	-0.00021	5.19e-05
18.96	-0.00014	8.42e-05	-0.00047576		-1.984e-05	-1.04e-05	5.19e-05
19.2	-6.4e-05	0.000104	-0.00036576		-3.984e-05	0.00011	-3.8e-05
19.44	-0.00021	-0.00013	-0.00035576		-2.984e-05	0.00025	3.19e-05
19.68	-5.4e-05	-0.00014	-0.00022576		4.016e-05	-3.04e-05	-4.8e-05
19.92	8.6e-05	4.24e-06	-0.00031576		0.00025016	3.96e-05	6.19e-05
20.16	0.000126	3.42e-05	-0.00021576		-0.0002698	9.96e-05	-0.00015
20.4	-8.4e-05	0.000124	-0.00039576		1.6e-07	-1.04e-05	-0.00011
20.64	-0.00027	-4.6e-05	-0.00036576		-9.984e-05	0.00013	2.19e-05
20.88	5.6e-05	-6.6e-05	-0.00017576		1.016e-05	-4.04e-05	0.000152
21.12	-0.00034	-2.6e-05	-0.00041576		-0.0001498	9.6e-06	-0.00013
21.36	7.6e-05	6.42e-05	-8.576e-05		0.00015016	0.0002	-2.8e-05
21.6	0.000196	4.24e-06	-0.00044576		4.016e-05	0.00012	4.19e-05
21.84	0.000226	4.24e-06	-0.00021576		-9.984e-05	-3.04e-05	-0.00022
22.08	-0.00036	-8.6e-05	-0.00027576		-7.984e-05	0.00024	7.19e-05
22.32	0.000366	9.42e-05	-0.00026576		-0.0001198	0.00013	-8.8e-05
22.56	7.6e-05	-0.00013	-0.00015576		0.00033016	3.96e-05	9.19e-05
22.8	0.000106	0.000134	-0.00023576		0.00013016	6.96e-05	-0.00013
23.04	-6.4e-05	-6.6e-05	-0.00021576		6.016e-05	-0.00016	-0.00027
23.28	0.000106	9.42e-05	-0.00030576		-0.0002698	0.00024	-0.00021
23.52	-0.0002	-0.00016	-0.00029576		4.016e-05	5.96e-05	-8.8e-05
23.76	1.6e-05	-0.00029	-0.00021576		0.00011016	0.00013	1.92e-06
24	4.6e-05	-0.00033	-0.00047576		0.00015016	-3.04e-05	2.19e-05
24.24	0.000136	-0.00018	-8.576e-05		-1.984e-05	-4.04e-05	0.000142
24.48	-0.0003	0.000134	4.24e-06		-0.0002398	2.96e-05	-1.8e-05
24.72	8.6e-05	-5.6e-05	-0.00022576		-8.984e-05	-0.0002	-0.0002
24.96	-0.0002	-0.00022	-0.00026576		5.016e-05	-0.00018	2.19e-05
25.2	7.6e-05	-0.0002	-0.00018576		-6.984e-05	5.96e-05	5.19e-05
25.44	-0.00014	-3.6e-05	-0.00018576		1.016e-05	-0.00015	0.000102
25.68	-6.4e-05	-0.00017	-0.00029576		3.016e-05	-0.00014	-0.00014
25.92	0.000156	0.000104	-0.00027576		-0.0001398	0.00023	0.000232
26.16	0.000146	-4.6e-05	-0.00033576		-8.984e-05	9.96e-05	1.19e-05
26.4	0.000116	-6.6e-05	-0.00025576		0.00010016	-0.00019	-0.00014
26.64	-3.4e-05	-7.6e-05	-0.00017576		-0.0002098	-3.04e-05	-0.00011
26.88	-6.4e-05	3.42e-05	-0.00049576		3.016e-05	-0.00028	-0.00024
27.12	-8.4e-05	8.42e-05	-0.00014576		0.00012016	-7.04e-05	-0.00016
27.36	-6.4e-05	-0.00023	-0.00017576		0.00011016	-2.04e-05	-4.8e-05
27.6	-0.00019	-2.6e-05	-0.00029576		6.016e-05	-0.0001	-0.00015
27.84	-0.00033	-5.8e-06	-0.00024576		0.00019016	-4e-07	1.92e-06
28.08	-3.4e-05	0.000194	-0.00037576		-0.0003298	9.6e-06	-1.8e-05
28.32	0.000256	-0.00012	-0.00030576		-0.0001598	-9.04e-05	-0.00018
28.56	-0.00015	4.42e-05	-0.00033576		-0.0001698	1.96e-05	-1.8e-05
28.8	8.6e-05	-0.00012	-0.00033576		0.00032016	0.00019	-0.00013
29.04	-0.00012	-0.00015	-0.00026576		0.00012016	-0.00021	-8.1e-06
29.28	-2.4e-05	-0.00018	-0.00012576		-0.0004198	0.0002	-0.00015
29.52	0.000136	-4.6e-05	-0.00031576		-0.0001798	-0.00029	-0.00016
29.76	-0.00024	-0.00014	3.424e-05		3.016e-05	3.96e-05	-0.00033
30	0.000246	0.000384	0.00031424		0.00012016	-5.04e-05	0.000102
30.24	0.000346	0.000554	0.00024424		-0.0001198	0.0002	0.000102
30.48	0.000366	0.000504	-0.0106158		-5.984e-05	4.96e-05	5.19e-05
30.72	-0.00886	-0.00881	-0.0534358		-0.0093998	-0.009	-0.01668
30.96	-0.04651	-0.04635	0.0196942		-0.0453898	-0.04645	-0.04811
31.2	0.018206*	0.017264*	-0.01873576*		0.01831016*	0.016940*	0.020702*
31.44	-0.01643	-0.01564	0.00054424		-0.0128498	-0.01627	-0.01972
31.68	0.000466	0.000754	0.00049424		-0.0006498	-0.00031	-0.00025
31.92	0.000426	0.000704	0.00084424		-8.984e-05	0.00037	0.000262
32.16	0.000496	0.000714	0.00097424		1.016e-05	0.00041	0.000282
32.4	0.000616	0.000534	0.00070424		0.00019016	0.00035	0.000372
32.64	0.000176	0.000794	0.00062424		0.00052016	0.00026	0.000372
32.88	0.000296	0.000574	0.00090424		0.00030016	0.00048	0.000372
33.12	0.000686	0.000714	0.00102424		0.00021016	0.0005	0.000392
33.36	0.000566	0.000874	0.00113424		0.00031016	0.00039	0.000632
33.6	0.000616	0.000684	0.00123424		0.00034016	0.00055	0.000602
33.84	0.000746	0.000704	0.00149424		0.00034016	0.00062	0.000712
34.08	0.000986	0.000814	0.00118424		0.00061016	0.00043	0.000662
34.32	0.000836	0.000974	0.00159424		0.00065016	0.00065	0.000912
34.56	0.000976	0.000974	0.00153424		0.00067016	0.00077	0.000882
34.8	0.000976	0.001174	0.00153424		0.00065016	0.00067	0.001022
35.04	0.000886	0.001024	0.00170424		0.00063016	0.00055	0.001112
35.28	0.001126	0.000984	0.00160424		0.00073016	0.00067	0.001202
35.52	0.000976	0.001164	0.00176424		0.00082016	0.00076	0.001102
35.76	0.001396	0.001324	0.00197424		0.00074016	0.00069	0.001122
36	0.001026	0.001314	0.00189424		0.00073016	0.00078	0.001342
36.24	0.001006	0.001124	0.00209424		0.00074016	0.00068	0.001402
36.48	0.001166	0.001274	0.00201424		0.00113016	0.00094	0.001592
36.72	0.001116	0.001234	0.00204424		0.00094016	0.00077	0.001512
36.96	0.000956	0.001294	0.00228424		0.00081016	0.00094	0.001442
37.2	0.001576	0.001414	0.00221424		0.00101016	0.00089	0.001612
37.44	0.001246	0.001214	0.00243424		0.00088016	0.00107	0.001622
37.68	0.001036	0.001394	0.00214424		0.00105016	0.00075	0.001752
37.92	0.001366	0.001404	0.00245424		0.00105016	0.00085	0.001732
38.16	0.001406	0.001484	0.00258424		0.00113016	0.00097	0.001882
38.4	0.001706	0.001214	0.00256424		0.00140016	0.00115	0.002002
38.64	0.001516	0.001604	0.00258424		0.00125016	0.00106	0.001772
38.88	0.001596	0.001564	0.00264424		0.00109016	0.00114	0.002002
39.12	0.001296	0.001654	0.00255424		0.00138016	0.00106	0.001992
39.36	0.001516	0.001734	0.00279424		0.00146016	0.00121	0.002162
39.6	0.001646	0.001744	0.00280424		0.00117016	0.00136	0.002132
39.84	0.001956	0.001564	0.00289424		0.00142016	0.00124	0.002092
40.08	0.001916	0.001814	0.00274424		0.00127016	0.00129	0.002262
40.32	0.001826	0.001814	0.00286424		0.00112016	0.0012	0.002412
40.56	0.001816	0.001944	0.00321424		0.00120016	0.00142	0.002142
40.8	0.001916	0.001724	0.00315424		0.00155016	0.00133	0.002272
41.04	0.001656	0.001994	0.00331424		0.00161016	0.00117	0.002512
41.28	0.001856	0.001904	0.00306424		0.00168016	0.00148	0.002552
41.52	0.002066	0.002024	0.00317424		0.00155016	0.00131	0.002402
41.76	0.002116	0.002044	0.00306424		0.00153016	0.00125	0.002592
42	0.002116	0.002064	0.00334424		0.00165016	0.0014	0.002492
42.24	0.001936	0.001874	0.00324424		0.00181016	0.00128	0.002732
42.48	0.002016	0.002034	0.00356424		0.00158016	0.00149	0.002572
42.72	0.002016	0.002054	0.00337424		0.00182016	0.00151	0.002752
42.96	0.002406	0.002084	0.00340424		0.00196016	0.0016	0.002652
43.2	0.002206	0.002074	0.00367424		0.00174016	0.00139	0.002712
43.44	0.002206	0.002044	0.00361424		0.00201016	0.00155	0.002982
43.68	0.002046	0.002114	0.00347424		0.00186016	0.00187	0.002832
43.92	0.002276	0.002284	0.00348424		0.00234016	0.00171	0.002692
44.16	0.002266	0.002004	0.00384424		0.00200016	0.00204	0.002872
44.4	0.002346	0.002284	0.00345424		0.00181016	0.00158	0.002942
44.64	0.002476	0.002324	0.00369424		0.00233016	0.00202	0.002932
44.88	0.002456	0.002334	0.00383424		0.00198016	0.00168	0.002982
45.12	0.002566	0.002474	0.00378424		0.00190016	0.00181	0.003152
45.36	0.002506	0.002394	0.00395424		0.00198016	0.00175	0.003302
45.6	0.002356	0.002554	0.00383424		0.00166016	0.00156	0.003402
45.84	0.002526	0.002304	0.00386424		0.00231016	0.00181	0.003122
46.08	0.002466	0.002664	0.00398424		0.00218016	0.00202	0.003282
46.32	0.002466	0.002454	0.00389424		0.00194016	0.00187	0.003082
46.56	0.002586	0.002414	0.00387424		0.00195016	0.0018	0.003242
46.8	0.002416	0.002464	0.00418424		0.00229016	0.00205	0.003542
47.04	0.002566	0.002604	0.00381424		0.00228016	0.00212	0.003392
47.28	0.002926	0.002584	0.00387424		0.00237016	0.00214	0.003302
47.52	0.002786	0.002344	0.00418424		0.00224016	0.00215	0.003492
47.76	0.002456	0.002574	0.00394424		0.00201016	0.00192	0.003322
48	0.002716	0.002344	0.00403424		0.00229016	0.00174	0.003462
48.24	0.002776	0.002464	0.00418424		0.00209016	0.00195	0.003402
48.48	0.002826	0.002614	0.00430424		0.00218016	0.0021	0.003402
48.72	0.002996	0.002664	0.00414424		0.00224016	0.00197	0.003632
48.96	0.002876	0.002584	0.00418424		0.00249016	0.00193	0.003442
49.2	0.002666	0.002414	0.00406424		0.00257016	0.00199	0.003772
49.44	0.002576	0.002724	0.00409424		0.00244016	0.00213	0.003672
49.68	0.002896	0.002704	0.00441424		0.00234016	0.00214	0.003392
49.92	0.002956	0.002764	0.00425424		0.00266016	0.00216	0.003772
50.16	0.002716	0.002794	0.00437424		0.00266016	0.0021	0.003512
50.4	0.003106	0.002874	0.00425424		0.00240016	0.00229	0.003782
50.64	0.002816	0.002534	0.00446424		0.00222016	0.00207	0.003822
50.88	0.003186	0.002824	0.00427424		0.00249016	0.0022	0.003932
51.12	0.003036	0.002834	0.00443424		0.00273016	0.0021	0.003752
51.36	0.002976	0.002884	0.00441424		0.00262016	0.00208	0.003702
51.6	0.002986	0.002614	0.00433424		0.00252016	0.00227	0.003652
51.84	0.003036	0.002784	0.00440424		0.00237016	0.00198	0.003782
52.08	0.002996	0.002814	0.00451424		0.00231016	0.00209	0.003772
52.32	0.002946	0.002804	0.00463424		0.00282016	0.00218	0.003822
52.56	0.003016	0.003094	0.00440424		0.00256016	0.00227	0.004012
52.8	0.003026	0.003024	0.00444424		0.00269016	0.00209	0.003932
53.04	0.003086	0.002964	0.00444424		0.00289016	0.00225	0.003642
53.28	0.003166	0.002824	0.00449424		0.00279016	0.00239	0.003852
53.52	0.003156	0.002634	0.00462424		0.00269016	0.0024	0.004112
53.76	0.003276	0.002754	0.00447424		0.00271016	0.0022	0.003972
54	0.003116	0.002964	0.00446424		0.00262016	0.00247	0.004062
54.24	0.003326	0.002954	0.00456424		0.00283016	0.0024	0.004042
54.48	0.003226	0.002834	0.00465424		0.00300016	0.00232	0.004162
54.72	0.003216	0.003164	0.00460424		0.00283016	0.00237	0.003942
54.96	0.003226	0.003044	0.00457424		0.00315016	0.00235	0.004122
55.2	0.003136	0.002864	0.00472424		0.00272016	0.0024	0.003962
55.44	0.003266	0.003084	0.00463424		0.00271016	0.00231	0.004342
55.68	0.003346	0.002984	0.00466424		0.00293016	0.00249	0.004282
55.92	0.003186	0.002994	0.00456424		0.00265016	0.00244	0.004152
56.16	0.003396	0.003094	0.00473424		0.00305016	0.0025	0.004172
56.4	0.003466	0.003134	0.00475424		0.00299016	0.00245	0.004102
56.64	0.003526	0.002934	0.00478424		0.00281016	0.00211	0.004382
56.88	0.003666	0.003064	0.00489424		0.00295016	0.00264	0.004152
57.12	0.003326	0.003144	0.00455424		0.00286016	0.00235	0.004132
57.36	0.003256	0.003204	0.00484424		0.00297016	0.00246	0.004122
57.6	0.003366	0.003054	0.00478424		0.00302016	0.00254	0.004322
57.84	0.003496	0.003074	0.00485424		0.00312016	0.00239	0.004402
58.08	0.003546	0.003044	0.00466424		0.00295016	0.0025	0.004312
58.32	0.003586	0.003104	0.00502424		0.00277016	0.0027	0.004332
58.56	0.003576	0.003194	0.00493424		0.00315016	0.00258	0.004252
58.8	0.003186	0.003044	0.00486424		0.00291016	0.00239	0.004292
59.04	0.003616	0.003224	0.00477424		0.00314016	0.00235	0.004382
59.28	0.003526	0.003154	0.00477424		0.00277016	0.0024	0.004452
59.52	0.003616	0.003324	0.00499424		0.00321016	0.00262	0.004242
59.76	0.003686	0.003224	0.00485424		0.00329016	0.00267	0.004502
60	0.003416	0.003064	0.00513424		0.00293016	0.00276	0.004532
60.24	0.003516	0.003464	0.00496424		0.00314016	0.0026	0.004822
60.48	0.003486	0.003124	0.00487424		0.00293016	0.00261	0.004332
60.72	0.003456	0.003394	0.00495424		0.00326016	0.00273	0.004632
60.96	0.003346	0.003354	0.00468424		0.00309016	0.0025	0.004502
61.2	0.003426	0.003374	0.00512424		0.00291016	0.00243	0.004432
61.44	0.003796	0.003284	0.00506424		0.00290016	0.00244	0.004502
61.68	0.003536	0.003104	0.00502424		0.00306016	0.00249	0.004612
61.92	0.003646	0.003274	0.00509424		0.00305016	0.00265	0.004432
62.16	0.003956	0.003454	0.00509424		0.00319016	0.00273	0.004612
62.4	0.003796	0.003404	0.00506424		0.00324016	0.00263	0.004632
62.64	0.003586	0.003294	0.00496424		0.00345016	0.00257	0.004542
62.88	0.003686	0.003194	0.00497424		0.00334016	0.00267	0.004592
63.12	0.003996	0.003174	0.00522424		0.00333016	0.0029	0.004422
63.36	0.003586	0.003464	0.00496424		0.00325016	0.00252	0.004552
63.6	0.003686	0.003224	0.00508424		0.00366016	0.00277	0.004442
63.84	0.003836	0.003274	0.00501424		0.00319016	0.00252	0.004592
64.08	0.003946	0.003384	0.00500424		0.00296016	0.00286	0.004662
64.32	0.003546	0.003214	0.00523424		0.00345016	0.00275	0.004562
64.56	0.003606	0.003354	0.00511424		0.00306016	0.00273	0.004682
64.8	0.003886	0.003304	0.00496424		0.00325016	0.0026	0.004822
65.04	0.003796	0.003504	0.00508424		0.00316016	0.00277	0.004642
65.28	0.003656	0.003664	0.00509424		0.00337016	0.0027	0.004652
65.52	0.003766	0.003564	0.00495424		0.00348016	0.0028	0.004852
65.76	0.003826	0.003324	0.00520424		0.00343016	0.00256	0.004542
66	0.003996	0.003124	0.00515424		0.00336016	0.00259	0.004802
66.24	0.003976	0.003634	0.00503424		0.00351016	0.00268	0.004612
66.48	0.003546	0.003544	0.00516424		0.00317016	0.00252	0.004702
66.72	0.003976	0.003524	0.00527424		0.00367016	0.00288	0.004702
66.96	0.004006	0.003444	0.00517424		0.00313016	0.00256	0.004772
67.2	0.003746	0.003624	0.00529424		0.00313016	0.0027	0.004692
67.44	0.003596	0.003404	0.00502424		0.00338016	0.00298	0.004632
67.68	0.003666	0.003584	0.00513424		0.00369016	0.00289	0.004922
67.92	0.004016	0.003624	0.00514424		0.00343016	0.0028	0.004792
68.16	0.004116	0.003214	0.00510424		0.00366016	0.00287	0.004812
68.4	0.003846	0.003364	0.00521424		0.00337016	0.00264	0.004722
68.64	0.003726	0.003284	0.00521424		0.00350016	0.00304	0.004812
68.88	0.003976	0.003394	0.00535424		0.00321016	0.00247	0.004822
69.12	0.003926	0.003464	0.00519424		0.00366016	0.00276	0.004802
69.36	0.003896	0.003564	0.00526424		0.00355016	0.00289	0.004782
69.6	0.003916	0.003594	0.00517424		0.00334016	0.0028	0.004802
69.84	0.004196	0.003754	0.00526424		0.00350016	0.00269	0.004832
70.08	0.003826	0.003424	0.00543424		0.00347016	0.00306	0.004842
70.32	0.003646	0.003384	0.00534424		0.00344016	0.00266	0.004932
70.56	0.004026	0.003594	0.00526424		0.00344016	0.00291	0.005102
70.8	0.003966	0.003464	0.00519424		0.00359016	0.00245	0.004942
71.04	0.003966	0.003424	0.00534424		0.00351016	0.00271	0.004942
71.28	0.004166	0.003164	0.00530424		0.00352016	0.00291	0.005052
71.52	0.003966	0.003344	0.00542424		0.00366016	0.00311	0.004932
71.76	0.004256	0.003324	0.00525424		0.00359016	0.00284	0.004892
72	0.003466	0.003564	0.00556424		0.00377016	0.00285	0.005022
72.24	0.003826	0.003534	0.00519424		0.00354016	0.00309	0.005032
72.48	0.003916	0.003764	0.00535424		0.00351016	0.00303	0.005062
72.72	0.003976	0.003404	0.00528424		0.00350016	0.00289	0.004782
72.96	0.004016	0.003514	0.00551424		0.00354016	0.00282	0.005092
73.2	0.004016	0.003684	0.00540424		0.00346016	0.00307	0.004842
73.44	0.004166	0.003834	0.00537424		0.00344016	0.00292	0.004822
73.68	0.004076	0.003574	0.00523424		0.00388016	0.00305	0.005162
73.92	0.004096	0.003724	0.00524424		0.00361016	0.00284	0.005002
74.16	0.004116	0.003764	0.00534424		0.00359016	0.00289	0.004992
74.4	0.003816	0.003524	0.00536424		0.00382016	0.0029	0.005092
74.64	0.003976	0.003544	0.00516424		0.00367016	0.00288	0.004992
74.88	0.004396	0.003564	0.00521424		0.00356016	0.0027	0.005102
75.12	0.003926	0.003404	0.00549424		0.00380016	0.00283	0.004922
75.36	0.004196	0.003624	0.00549424		0.00362016	0.00329	0.005032
75.6	0.004136	0.003714	0.00558424		0.00375016	0.00273	0.005122
75.84	0.004216	0.003494	0.00527424		0.00345016	0.00305	0.004952
76.08	0.004186	0.003644	0.00565424		0.00373016	0.00299	0.005092
76.32	0.004096	0.003484	0.00532424		0.00372016	0.00293	0.005032
76.56	0.003976	0.003654	0.00551424		0.00361016	0.00305	0.005002
76.8	0.004276	0.003904	0.00550424		0.00377016	0.00319	0.005062
77.04	0.004146	0.003864	0.00549424		0.00387016	0.00322	0.005002
77.28	0.004266	0.003754	0.00551424		0.00371016	0.00314	0.005052
77.52	0.003996	0.003704	0.00547424		0.00367016	0.00303	0.005222
77.76	0.004256	0.003634	0.00541424		0.00388016	0.00309	0.005222
78	0.004206	0.003614	0.00539424		0.00363016	0.00275	0.005152
78.24	0.003946	0.003674	0.00543424		0.00387016	0.0031	0.005022
78.48	0.004476	0.003814	0.00547424		0.00343016	0.00308	0.005232
78.72	0.004016	0.003584	0.00539424		0.00395016	0.00313	0.005282
78.96	0.004296	0.003654	0.00551424		0.00397016	0.00302	0.004972
79.2	0.004176	0.003604	0.00556424		0.00363016	0.00323	0.005002
79.44	0.003896	0.003594	0.00534424		0.00363016	0.0029	0.005242
79.68	0.004156	0.003534	0.00553424		0.00354016	0.00286	0.005142
79.92	0.004226	0.003534	0.00544424		0.00330016	0.00293	0.005142
80.16	0.004256	0.003834	0.00549424		0.00370016	0.00283	0.005382
80.4	0.004336	0.003524	0.00562424		0.00371016	0.00281	0.004862
80.64	0.004296	0.003654	0.00533424		0.00380016	0.00318	0.005142
80.88	0.004116	0.003644	0.00562424		0.00383016	0.00296	0.005182
81.12	0.004426	0.003654	0.00558424		0.00372016	0.00293	0.005322
81.36	0.004066	0.003834	0.00560424		0.00376016	0.00315	0.005452
81.6	0.004226	0.003714	0.00544424		0.00383016	0.00316	0.005172
81.84	0.004186	0.003774	0.00559424		0.00354016	0.00283	0.005092
82.08	0.004126	0.003824	0.00563424		0.00415016	0.00299	0.005282
82.32	0.004536	0.003974	0.00549424		0.00387016	0.00296	0.005192
82.56	0.004266	0.003534	0.00563424		0.00366016	0.003	0.005192
82.8	0.004206	0.003614	0.00553424		0.00402016	0.00315	0.005352
83.04	0.003946	0.003664	0.00577424		0.00359016	0.0032	0.005362
83.28	0.004376	0.003634	0.00553424		0.00396016	0.00303	0.005092
83.52	0.004416	0.003444	0.00554424		0.00395016	0.00331	0.005182
83.76	0.004476	0.003804	0.00541424		0.00367016	0.00293	0.005372
84	0.004596	0.003744	0.00551424		0.00368016	0.00324	0.005282
84.24	0.004216	0.003774	0.00563424		0.00401016	0.00303	0.005252
84.48	0.004196	0.003654	0.00553424		0.00414016	0.00318	0.005392
84.72	0.004436	0.003594	0.00560424		0.00373016	0.00312	0.005352
84.96	0.004046	0.003734	0.00545424		0.00396016	0.00315	0.005192
85.2	0.004006	0.003754	0.00561424		0.00399016	0.00317	0.005442
85.44	0.004356	0.003924	0.00531424		0.00363016	0.00299	0.005262
85.68	0.004326	0.003884	0.00559424		0.00392016	0.00319	0.005332
85.92	0.004266	0.003604	0.00555424		0.00419016	0.00301	0.005172
86.16	0.004416	0.003904	0.00564424		0.00401016	0.00339	0.005162
86.4	0.004276	0.003904	0.00534424		0.00391016	0.00304	0.005322
86.64	0.004456	0.003654	0.00561424		0.00392016	0.00319	0.005232
86.88	0.004356	0.003984	0.00569424		0.00376016	0.003	0.005252
87.12	0.004436	0.003594	0.00548424		0.00378016	0.00317	0.005462
87.36	0.004186	0.003684	0.00567424		0.00404016	0.00301	0.005322
87.6	0.004286	0.004054	0.00564424		0.00359016	0.00316	0.005442
87.84	0.004196	0.003864	0.00555424		0.00371016	0.00298	0.005222
88.08	0.004596	0.003774	0.00567424		0.00395016	0.00314	0.005222
88.32	0.004436	0.003624	0.00576424		0.00367016	0.00337	0.005522
88.56	0.004376	0.003794	0.00564424		0.00412016	0.00278	0.005402
88.8	0.004516	0.004004	0.00568424		0.00394016	0.00321	0.005362
89.04	0.004496	0.003874	0.00538424		0.00402016	0.00318	0.005612
89.28	0.004076	0.003734	0.00543424		0.00404016	0.00311	0.005362
89.52	0.004366	0.003574	0.00570424		0.00377016	0.00317	0.005382
89.76	0.004476	0.003814	0.00557424		0.00387016	0.0029	0.005152
90	0.004576	0.003964	0.00554424		0.00371016	0.00324	0.005562
90.24	0.004276	0.003654	0.00561424		0.00388016	0.00319	0.005252
90.48	0.004786	0.003674	0.00546424		0.00405016	0.00324	0.005362
90.72	0.004676	0.003884	0.00559424		0.00418016	0.00331	0.005302
90.96	0.004486	0.003734	0.00566424		0.00417016	0.00322	0.005562
91.2	0.004516	0.003794	0.00568424		0.00404016	0.00285	0.005502
91.44	0.004226	0.003894	0.00552424		0.00409016	0.00294	0.005462
91.68	0.004356	0.003614	0.00567424		0.00403016	0.00304	0.005542
91.92	0.004576	0.003744	0.00568424		0.00413016	0.00308	0.005372
92.16	0.004506	0.003724	0.00561424		0.00397016	0.00332	0.005392
92.4	0.004636	0.003484	0.00572424		0.00419016	0.00312	0.005612
92.64	0.004276	0.003704	0.00565424		0.00370016	0.00321	0.005412
92.88	0.004266	0.003834	0.00584424		0.00399016	0.00325	0.005362
93.12	0.004476	0.003874	0.00575424		0.00400016	0.00329	0.005562
93.36	0.004356	0.003574	0.00590424		0.00376016	0.00311	0.005482
93.6	0.004476	0.003814	0.00582424		0.00405016	0.00311	0.005502
93.84	0.004396	0.003824	0.00576424		0.00399016	0.00299	0.005432
94.08	0.004226	0.003634	0.00559424		0.00411016	0.00281	0.005442
94.32	0.004306	0.003824	0.00565424		0.00389016	0.00302	0.005312
94.56	0.004656	0.004034	0.00589424		0.00406016	0.00301	0.005342
94.8	0.004276	0.003754	0.00579424		0.00413016	0.00341	0.005612
95.04	0.004576	0.004134	0.00588424		0.00379016	0.00333	0.005522
95.28	0.004476	0.003684	0.00577424		0.00415016	0.00333	0.005612
95.52	0.004286	0.003744	0.00550424		0.00418016	0.003	0.005502
95.76	0.004596	0.003834	0.00579424		0.00398016	0.00313	0.005612
96	0.004276	0.004184	0.00574424		0.00431016	0.00325	0.005782
96.24	0.004416	0.003754	0.00585424		0.00413016	0.00311	0.005782
96.48	0.004606	0.003924	0.00566424		0.00429016	0.0032	0.005432
96.72	0.004416	0.003814	0.00574424		0.00394016	0.00317	0.005572
96.96	0.004546	0.003864	0.00597424		0.00399016	0.00329	0.005462
97.2	0.004466	0.003904	0.00565424		0.00394016	0.00351	0.005412
97.44	0.004356	0.004094	0.00578424		0.00423016	0.0031	0.005262
97.68	0.004496	0.003884	0.00583424		0.00403016	0.00299	0.005502
97.92	0.004406	0.004114	0.00579424		0.00421016	0.00337	0.005602
98.16	0.004476	0.003854	0.00579424		0.00428016	0.00312	0.005662
98.4	0.004686	0.003614	0.00583424		0.00416016	0.00316	0.005662
98.64	0.004166	0.003714	0.00587424		0.00383016	0.00299	0.005622
98.88	0.004626	0.004014	0.00583424		0.00406016	0.00334	0.005292
99.12	0.004576	0.003644	0.00593424		0.00401016	0.00317	0.005452
99.36	0.004516	0.003604	0.00567424		0.00408016	0.00315	0.005472
99.6	0.004326	0.004074	0.00585424		0.00433016	0.00348	0.005582
99.84	0.004346	0.003694	0.00572424		0.00419016	0.00316	0.005412
100.08	0.004496	0.003814	0.00579424		0.00427016	0.00341	0.005542
100.32	0.004566	0.003944	0.00576424		0.00407016	0.00313	0.005532
100.56	0.004366	0.003974	0.00569424		0.00392016	0.00329	0.005532
100.8	0.004486	0.003734	0.00564424		0.00399016	0.00344	0.005642
101.04	0.004736	0.003804	0.00577424		0.00419016	0.00327	0.005512
101.28	0.004776	0.003774	0.00563424		0.00395016	0.00344	0.005452
101.52	0.004536	0.003884	0.00577424		0.00430016	0.00327	0.005692
101.76	0.004426	0.004064	0.00577424		0.00398016	0.00346	0.005692
102	0.004466	0.003974	0.00576424		0.00444016	0.0034	0.005712
102.24	0.004496	0.003644	0.00596424		0.00387016	0.00344	0.005672
102.48	0.004536	0.003674	0.00589424		0.00387016	0.00317	0.005562
102.72	0.004406	0.003924	0.00594424		0.00429016	0.0032	0.005682
102.96	0.004536	0.003914	0.00565424		0.00436016	0.00317	0.005802
103.2	0.004486	0.003844	0.00578424		0.00400016	0.00325	0.005612
103.44	0.004596	0.003964	0.00575424		0.00398016	0.00322	0.005632
103.68	0.004386	0.004064	0.00584424		0.00401016	0.00323	0.005492
103.92	0.004226	0.003794	0.00583424		0.00408016	0.00336	0.005492
104.16	0.004256	0.003814	0.00581424		0.00438016	0.00304	0.005452
104.4	0.004496	0.003894	0.00585424		0.00446016	0.00341	0.005662
104.64	0.004756	0.003594	0.00594424		0.00417016	0.00328	0.005312
104.88	0.004336	0.003684	0.00573424		0.00404016	0.00303	0.005382
105.12	0.004546	0.003784	0.00584424		0.00438016	0.0033	0.005562
105.36	0.004436	0.003674	0.00575424		0.00429016	0.00328	0.005612
105.6	0.004726	0.003894	0.00583424		0.00416016	0.00322	0.005542
105.84	0.004596	0.003774	0.00567424		0.00419016	0.00322	0.005612
106.08	0.004516	0.003724	0.00593424		0.00425016	0.0032	0.005522
106.32	0.004926	0.004014	0.00584424		0.00429016	0.00307	0.005402
106.56	0.004246	0.003774	0.00601424		0.00450016	0.0032	0.005452
106.8	0.004836	0.003704	0.00586424		0.00411016	0.00313	0.005512
107.04	0.004456	0.003804	0.00581424		0.00467016	0.00336	0.005762
107.28	0.004276	0.003924	0.00584424		0.00422016	0.00326	0.005722
107.52	0.004796	0.004084	0.00581424		0.00394016	0.00318	0.005562
107.76	0.004686	0.003814	0.00585424		0.00451016	0.00334	0.005672
108	0.004486	0.003644	0.00591424		0.00448016	0.0032	0.005572
108.24	0.004706	0.003964	0.00594424		0.00415016	0.0033	0.005512
108.48	0.004796	0.003994	0.00575424		0.00403016	0.00328	0.005512
108.72	0.004656	0.003894	0.00597424		0.00446016	0.00329	0.005662
108.96	0.004576	0.003954	0.00592424		0.00445016	0.00326	0.005642
109.2	0.004646	0.004164	0.00578424		0.00432016	0.00341	0.005652
109.44	0.004716	0.003914	0.00580424		0.00413016	0.00302	0.005502
109.68	0.004556	0.003684	0.00585424		0.00444016	0.00324	0.005562
109.92	0.004766	0.004054	0.00603424		0.00436016	0.0031	0.005562
110.16	0.004846	0.003754	0.00585424		0.00435016	0.00296	0.005562
110.4	0.004666	0.004014	0.00604424		0.00416016	0.00329	0.005672
110.64	0.004656	0.003974	0.00584424		0.00411016	0.00307	0.005592
110.88	0.004806	0.004104	0.00590424		0.00423016	0.00319	0.005632
111.12	0.004586	0.004044	0.00588424		0.00415016	0.00332	0.005802
111.36	0.004506	0.003964	0.00594424		0.00403016	0.00329	0.005752
111.6	0.004656	0.004004	0.00567424		0.00449016	0.00343	0.005682
111.84	0.004706	0.003904	0.00601424		0.00427016	0.00316	0.005612
112.08	0.004716	0.003614	0.00582424		0.00413016	0.00314	0.005682
112.32	0.004686	0.003904	0.00587424		0.00403016	0.00311	0.005332
112.56	0.004516	0.003834	0.00602424		0.00434016	0.00313	0.005652
112.8	0.004516	0.003894	0.00599424		0.00435016	0.00306	0.005672
113.04	0.004456	0.004114	0.00587424		0.00412016	0.00323	0.005712
113.28	0.004396	0.003704	0.00596424		0.00424016	0.00336	0.005652
113.52	0.004626	0.003844	0.00595424		0.00418016	0.00325	0.005622
113.76	0.004456	0.003884	0.00581424		0.00425016	0.00327	0.005522
114	0.004586	0.003884	0.00587424		0.00418016	0.00319	0.005682
114.24	0.004856	0.004204	0.00571424		0.00444016	0.00328	0.005522
114.48	0.004686	0.003544	0.00578424		0.00432016	0.00325	0.005492
114.72	0.004806	0.003824	0.00567424		0.00426016	0.00341	0.005762
114.96	0.004426	0.003814	0.00575424		0.00421016	0.00336	0.005652
115.2	0.004436	0.003944	0.00590424		0.00393016	0.00307	0.005792
115.44	0.004646	0.003904	0.00588424		0.00463016	0.00329	0.005762
115.68	0.004586	0.003774	0.00586424		0.00445016	0.00317	0.005662
115.92	0.004816	0.003724	0.00604424		0.00428016	0.00328	0.005552
116.16	0.004806	0.003804	0.00604424		0.00417016	0.00323	0.005742
116.4	0.004516	0.004064	0.00597424		0.00435016	0.00342	0.005772
116.64	0.004796	0.003754	0.00589424		0.00437016	0.00339	0.005722
116.88	0.004706	0.004004	0.00592424		0.00462016	0.0035	0.005612
117.12	0.004726	0.003744	0.00575424		0.00414016	0.00321	0.005732
117.36	0.004416	0.004144	0.00596424		0.00428016	0.0031	0.005952
117.6	0.004636	0.004124	0.00592424		0.00441016	0.00301	0.005522
117.84	0.004696	0.003734	0.00586424		0.00486016	0.00357	0.005722
118.08	0.004446	0.003744	0.00587424		0.00396016	0.00322	0.005702
118.32	0.004676	0.003714	0.00573424		0.00462016	0.0033	0.005682
118.56	0.004386	0.003904	0.00601424		0.00441016	0.00353	0.005692
118.8	0.004516	0.004014	0.00590424		0.00439016	0.00325	0.005602
119.04	0.004506	0.003954	0.00596424		0.00464016	0.00311	0.005722
119.28	0.004666	0.004064	0.00587424		0.00451016	0.00361	0.005652
119.52	0.004626	0.003764	0.00608424		0.00453016	0.00317	0.005622
119.76	0.0115511	0.00567881	0.00914245	0.0128724	0.012053	0.006437	0.00861	0.012128
120	0.0116859	0.00562201	0.00929493	0.0133806	0.011526	0.006843	0.008644	0.011833
120.24	0.0117216	0.00553803	0.00945117	0.013106	0.011307	0.006435	0.008873	0.011658
120.48	0.0121013	0.00529257	0.00940489	0.0131346	0.012072	0.00641	0.008697	0.011833
120.72	0.0120154	0.00560344	0.00950854	0.0129989	0.011637	0.006632	0.008553	0.01166
120.96	0.0118093	0.00579745	0.00938544	0.0129011	0.012238	0.006532	0.008602	0.011445
121.2	0.01194	0.00559126	0.00946955	0.0129175	0.011808	0.006589	0.009028	0.011579
121.44	0.0117763	0.00560735	0.00940524	0.0127484	0.011848	0.006842	0.008727	0.011734
121.68	0.0117676	0.00545334	0.00945561	0.0131591	0.011533	0.007067	0.008807	0.012157
121.92	0.0114485	0.00553535	0.00957871	0.0124214	0.012252	0.006627	0.008698	0.012176
122.16	0.0123843	0.00537404	0.00904696	0.0129418	0.011717	0.006475	0.008564	0.011729
122.4	0.0116699	0.00568178	0.0093257	0.0131372	0.011658	0.006735	0.009057	0.011605
122.64	0.011816	0.00554445	0.00952861	0.0129048	0.011857	0.006719	0.008738	0.011684
122.88	0.0115181	0.00554185	0.00954012	0.0129199	0.011807	0.006552	0.008709	0.011842
123.12	0.0119335	0.00558245	0.00919776	0.0129449	0.01199	0.006864	0.008906	0.011505
123.36	0.011698	0.0055056	0.00919394	0.0128199	0.012058	0.006655	0.008724	0.011517
123.6	0.0118782	0.00536617	0.00945777	0.0126794	0.011757	0.006763	0.00882	0.011756
123.84	0.011757	0.00574641	0.0093937	0.0126838	0.011808	0.006867	0.009298	0.012082
124.08	0.0119758	0.00561693	0.00927422	0.0127052	0.012007	0.006575	0.008918	0.011872
124.32	0.0120225	0.0055261	0.00943914	0.0130078	0.012117	0.006253	0.00873	0.012095
124.56	0.0120231	0.00582976	0.0095013	0.0125574	0.011651	0.006569	0.00868	0.011733
124.8	0.012077	0.00593928	0.00942862	0.0131459	0.011767	0.006565	0.00908	0.012298
125.04	0.0121768	0.0057091	0.0091871	0.0128944	0.011803	0.006713	0.008777	0.011821
125.28	0.0116522	0.00576794	0.00953413	0.0131268	0.011944	0.006596	0.008789	0.012089
125.52	0.0117566	0.00554068	0.00960966	0.0125454	0.011858	0.006421	0.008613	0.012002
125.76	0.0122934	0.00568078	0.00924678	0.0127402	0.011598	0.006246	0.009013	0.012039
126	0.0117459	0.00536463	0.0093979	0.0128712	0.011966	0.006698	0.008831	0.011743
126.24	0.0118685	0.00563319	0.00918185	0.0131167	0.011723	0.006469	0.009073	0.011573
126.48	0.0116922	0.00558573	0.0092607	0.0130809	0.01199	0.007145	0.009004	0.011447
126.72	0.0119248	0.00582304	0.00947631	0.0124923	0.011914	0.006709	0.008812	0.011958
126.96	0.0120821	0.00572058	0.00945806	0.0125098	0.012396	0.006132	0.009016	0.011892
127.2	0.0117281	0.00547834	0.0094927	0.0133371	0.011686	0.006533	0.00859	0.011412
127.44	0.011541	0.00589577	0.00944143	0.0132705	0.011764	0.006527	0.008621	0.011802
127.68	0.0120628	0.00542605	0.00928153	0.0129474	0.011669	0.006433	0.009196	0.011711
127.92	0.0118842	0.00572713	0.00942984	0.0128392	0.011842	0.006554	0.009001	0.011714
128.16	0.0119165	0.00562569	0.00911127	0.0130724	0.011859	0.006796	0.008683	0.012074
128.4	0.0118286	0.00536463	0.00940848	0.01285	0.012225	0.006773	0.008461	0.011716
128.64	0.0119466	0.00546628	0.00916314	0.0130428	0.012043	0.006566	0.008756	0.011798
128.88	0.012139	0.00580976	0.00949158	0.0128673	0.012656	0.006816	0.008503	0.011944
129.12	0.0117512	0.00559724	0.00929142	0.0131206	0.011784	0.006575	0.0085	0.011946
129.36	0.0121528	0.00585405	0.00903145	0.0125683	0.01203	0.006629	0.009313	0.011981
129.6	0.0119879	0.00565112	0.00957435	0.0129729	0.012014	0.006513	0.008582	0.012051
129.84	0.0121644	0.0056624	0.00965789	0.0128111	0.012023	0.006551	0.008858	0.011681
130.08	0.011698	0.00571627	0.00934277	0.0132861	0.011746	0.006565	0.008659	0.012061
130.32	0.012028	0.0056686	0.00961696	0.0127796	0.012126	0.006648	0.009112	0.012427
130.56	0.0120919	0.00550826	0.00936571	0.012934	0.012236	0.006544	0.009116	0.011818
130.8	0.0119751	0.00561312	0.00937934	0.0131105	0.01213	0.006838	0.008773	0.011848
131.04	0.0117955	0.00571581	0.00949142	0.0133537	0.012562	0.0065	0.008526	0.012187
131.28	0.0119489	0.00552487	0.00936044	0.0129175	0.012116	0.006664	0.009109	0.011799
131.52	0.0123967	0.00541435	0.00956796	0.0131118	0.012118	0.006415	0.008725	0.011876
131.76	0.0121196	0.00562106	0.00950134	0.0134155	0.011567	0.006788	0.009538	0.011996
132	0.0118364	0.00586031	0.00913281	0.0133686	0.011709	0.006842	0.008943	0.011968
132.24	0.0115989	0.00556387	0.00945497	0.012915	0.012024	0.006747	0.008894	0.011771
132.48	0.0120888	0.00570832	0.00940915	0.01238	0.01181	0.006629	0.008986	0.011834
132.72	0.0117015	0.00550545	0.00979431	0.0127674	0.011788	0.006628	0.008922	0.011751
132.96	0.0120228	0.00552735	0.00930816	0.0130376	0.012035	0.006689	0.008949	0.012223
133.2	0.011963	0.00563912	0.00945466	0.012999	0.011906	0.006504	0.008885	0.01198
133.44	0.0117933	0.0053703	0.00947505	0.0133352	0.011977	0.006693	0.009442	0.011869
133.68	0.0120618	0.00564327	0.00930175	0.0134136	0.012377	0.006653	0.009103	0.011482
133.92	0.011718	0.00567415	0.00969997	0.013413	0.011523	0.006628	0.008699	0.011793
134.16	0.0120389	0.00544504	0.00962519	0.013069	0.01196	0.006509	0.008928	0.011569
134.4	0.0120921	0.0056324	0.00934332	0.0130759	0.012163	0.006463	0.009123	0.011721
134.64	0.0121557	0.00550359	0.00939369	0.0132331	0.012208	0.00682	0.009154	0.011924
134.88	0.0118731	0.0053242	0.00962855	0.0129506	0.011846	0.006664	0.009076	0.011777
135.12	0.0117386	0.00580553	0.00958624	0.0131758	0.011676	0.006608	0.009158	0.01163
135.36	0.011806	0.00547875	0.00973924	0.0130727	0.012358	0.00654	0.008896	0.011814
135.6	0.0116885	0.00542002	0.0096505	0.0131089	0.011845	0.006617	0.009063	0.011705
135.84	0.0121463	0.00557089	0.00938484	0.0129128	0.012193	0.006737	0.009117	0.011787
136.08	0.0119069	0.00557476	0.00948623	0.0129719	0.011865	0.006686	0.009239	0.012156
136.32	0.0119579	0.00550188	0.0096409	0.013065	0.012178	0.006505	0.008858	0.011888
136.56	0.0119823	0.00523925	0.00932901	0.0131013	0.012476	0.006367	0.008809	0.012187
136.8	0.011736	0.00579408	0.00969604	0.012908	0.012234	0.006532	0.009133	0.011887
137.04	0.0121188	0.00518803	0.0094633	0.0134036	0.011951	0.006284	0.009095	0.012189
137.28	0.0115794	0.00572443	0.0095323	0.0132964	0.011767	0.006723	0.008923	0.012495
137.52	0.0117861	0.0055818	0.00938149	0.0134027	0.011988	0.006452	0.009002	0.012006
137.76	0.0121324	0.00559662	0.00926818	0.012436	0.011997	0.006531	0.009271	0.01186
138	0.0119582	0.00540148	0.00964884	0.0132403	0.012172	0.006806	0.009016	0.01229
138.24	0.0120251	0.00537024	0.0096908	0.0136236	0.011655	0.006757	0.009147	0.012034
138.48	0.011696	0.00548991	0.00954201	0.0127774	0.011643	0.006668	0.00921	0.011928
138.72	0.0118124	0.00571345	0.00955284	0.0131772	0.012024	0.006787	0.008707	0.011894
138.96	0.0119765	0.00556867	0.00947099	0.0128261	0.011985	0.006654	0.009086	0.011656
139.2	0.0117766	0.00520246	0.00938473	0.013412	0.011693	0.006763	0.009379	0.011696
139.44	0.0120878	0.00553557	0.00935568	0.0133923	0.011531	0.006575	0.008813	0.012508
139.68	0.0116177	0.0053749	0.00946767	0.0133688	0.011985	0.006793	0.008828	0.011861
139.92	0.0116017	0.00522531	0.00972245	0.0129901	0.012241	0.006765	0.009175	0.011719
140.16	0.0116455	0.0054805	0.00969531	0.0131022	0.011966	0.006615	0.008937	0.012084
140.4	0.0117385	0.00572357	0.0095502	0.0133411	0.012208	0.006736	0.009399	0.011787
140.64	0.0120002	0.0054576	0.00961687	0.0128638	0.012189	0.006869	0.008865	0.012067
140.88	0.0116944	0.00564495	0.00948302	0.0130664	0.012087	0.006618	0.009352	0.011818
141.12	0.0120577	0.0057556	0.00950201	0.0132819	0.012059	0.0065	0.009277	0.012396
141.36	0.011718	0.00570322	0.00947447	0.0133005	0.011796	0.006352	0.008752	0.01173
141.6	0.0120307	0.00577467	0.0094951	0.0131202	0.012094	0.006623	0.009006	0.011453
141.84	0.0120927	0.00548158	0.0095751	0.0128229	0.012018	0.006546	0.008943	0.011934
142.08	0.0120765	0.00521044	0.00966713	0.0132852	0.011659	0.00692	0.008909	0.011798
142.32	0.0121612	0.00535901	0.00966436	0.0132451	0.012136	0.006699	0.009414	0.011856
142.56	0.011857	0.00524025	0.00953461	0.0134905	0.011701	0.006569	0.009557	0.012182
142.8	0.0121529	0.00548158	0.0095108	0.0130923	0.011947	0.006683	0.009147	0.011768
143.04	0.0122449	0.00550706	0.00960386	0.0131928	0.012516	0.006437	0.009459	0.011864
143.28	0.0119559	0.00537815	0.00946342	0.0133815	0.012122	0.006612	0.009193	0.012122
143.52	0.0118696	0.00512993	0.00971852	0.0129655	0.012334	0.006798	0.009479	0.012129
143.76	0.0117548	0.00551709	0.00953286	0.0130754	0.012019	0.006535	0.009227	0.011975
144	0.0120335	0.00569866	0.00952389	0.0133108	0.011975	0.00666	0.009097	0.011821
144.24	0.0120182	0.00559857	0.00963676	0.0132588	0.011657	0.006281	0.009013	0.012118
144.48	0.0120187	0.00547929	0.00944345	0.0133076	0.012261	0.006518	0.009068	0.011757
144.72	0.011905	0.00514024	0.00941647	0.013428	0.012074	0.006565	0.009179	0.011852
144.96	0.012042	0.00530796	0.00931363	0.0129311	0.012096	0.007098	0.009324	0.011816
145.2	0.0117175	0.00548145	0.00976613	0.0130476	0.011952	0.006598	0.009283	0.011891
145.44	0.0119942	0.00531272	0.00924356	0.0132167	0.012078	0.006812	0.009102	0.011761
145.68	0.0121079	0.00544959	0.00963932	0.0130904	0.012091	0.006871	0.00914	0.011904
145.92	0.0119065	0.00556664	0.00977439	0.0131793	0.01207	0.006732	0.009335	0.012037
146.16	0.0120538	0.00568591	0.0095644	0.0131711	0.012696	0.006483	0.009004	0.011828
146.4	0.0119484	0.00550131	0.00974532	0.0134211	0.012136	0.006768	0.009425	0.011913
146.64	0.0121198	0.00549172	0.0100359	0.0137231	0.012428	0.006341	0.009197	0.012356
146.88	0.012021	0.00507758	0.00986606	0.013141	0.012437	0.006757	0.009269	0.012183
147.12	0.011983	0.00546943	0.00956824	0.0129543	0.012012	0.006979	0.009222	0.011934
147.36	0.0121813	0.0051348	0.00949541	0.0132115	0.011772	0.006432	0.009498	0.011825
147.6	0.0118062	0.00548592	0.00988823	0.0132146	0.012528	0.0069	0.00945	0.011837
147.84	0.0119098	0.00524503	0.00966092	0.0131421	0.012151	0.006765	0.009081	0.0123
148.08	0.0118419	0.00531256	0.0094574	0.012857	0.012023	0.006715	0.008936	0.011812
148.32	0.0121394	0.00568128	0.00956273	0.0132542	0.012343	0.006477	0.009493	0.011765
148.56	0.0116779	0.00562742	0.00968096	0.0132011	0.012416	0.006558	0.009085	0.011666
148.8	0.0119192	0.00535848	0.00982568	0.0133237	0.0122	0.007035	0.008952	0.011669
149.04	0.0121574	0.00517913	0.00967772	0.0134302	0.012061	0.006621	0.009093	0.012185
149.28	0.0118144	0.00515118	0.00957897	0.0133827	0.012201	0.006523	0.009183	0.011969
149.52	0.0122131	0.00559281	0.00959329	0.0132079	0.012382	0.006611	0.00905	0.012287
149.76	0.0118573	0.00536098	0.00956887	0.0128531	0.012106	0.006803	0.009176	0.012123
150	0.0124317	0.00553571	0.00963821	0.013053	0.011928	0.006994	0.008844	0.011483
150.24	0.0140132	0.0060389	0.0106654	0.013592	0.012154	0.006962	0.008927	0.011818
150.48	0.0153586	0.00645118	0.0121026	0.0146907	0.012157	0.006532	0.008849	0.011823
150.72	0.0164926	0.00700034	0.0128507	0.0138942	0.012317	0.006793	0.009398	0.011551
150.96	0.0173695	0.00772961	0.0134864	0.0145882	0.012234	0.006896	0.009146	0.011603
151.2	0.0191597	0.00824254	0.014594	0.0148688	0.012477	0.006644	0.00942	0.012048
151.44	0.0195836	0.00843588	0.0151653	0.0152881	0.012331	0.006453	0.009253	0.011803
151.68	0.0203003	0.0087913	0.0157327	0.0160416	0.012359	0.006665	0.008934	0.011623
151.92	0.0209478	0.00933074	0.0164944	0.0158617	0.012558	0.006776	0.009099	0.011627
152.16	0.0212736	0.00905921	0.0168404	0.0161999	0.012379	0.006595	0.009349	0.011797
152.4	0.0221009	0.00966153	0.0167262	0.016171	0.012555	0.007047	0.009284	0.012074
152.64	0.0225963	0.00965467	0.0177544	0.0164507	0.012331	0.006866	0.009085	0.012051
152.88	0.0232325	0.0100737	0.0178365	0.0171392	0.012363	0.006943	0.009329	0.011684
153.12	0.0235634	0.00995309	0.0182584	0.0164887	0.012444	0.00692	0.009129	0.012204
153.36	0.024223	0.0104535	0.0185267	0.0169692	0.011622	0.006661	0.009695	0.011961
153.6	0.0241243	0.010593	0.0192726	0.0173542	0.012657	0.006663	0.009511	0.011774
153.84	0.0244794	0.0107856	0.0192305	0.0169128	0.012073	0.006788	0.009603	0.011392
154.08	0.0247866	0.0106866	0.0194813	0.0172459	0.012237	0.006649	0.009329	0.011457
154.32	0.0252257	0.0112349	0.019718	0.0173015	0.012344	0.006863	0.009226	0.011778
154.56	0.0253264	0.011053	0.019672	0.0178234	0.012119	0.006549	0.009204	0.011943
154.8	0.0257965	0.0114569	0.0200448	0.0175696	0.012843	0.006791	0.009226	0.011677
155.04	0.0259489	0.0113918	0.0204622	0.0179216	0.012743	0.006835	0.009348	0.012217
155.28	0.0261153	0.0114844	0.0206697	0.0177712	0.012791	0.006852	0.009143	0.011942
155.52	0.0265681	0.0119754	0.0208226	0.0177805	0.012562	0.006824	0.009288	0.011979
155.76	0.0264134	0.011823	0.0209104	0.0181845	0.012801	0.006799	0.009164	0.011751
156	0.0266866	0.011844	0.0208742	0.0182566	0.012385	0.00681	0.009348	0.011749
156.24	0.0268263	0.011732	0.0213688	0.0182413	0.012278	0.006528	0.009698	0.012046
156.48	0.0271378	0.0119074	0.0211765	0.0182611	0.012678	0.006921	0.009629	0.011639
156.72	0.0272741	0.0123434	0.0215295	0.0182501	0.012409	0.006757	0.009511	0.011884
156.96	0.0278152	0.0122995	0.0218436	0.0181654	0.012294	0.006932	0.009176	0.011999
157.2	0.0277114	0.0124565	0.0218053	0.0179959	0.01272	0.007151	0.009206	0.01208
157.44	0.027481	0.0126581	0.0219254	0.0186853	0.012742	0.007216	0.009256	0.011851
157.68	0.0286218	0.0125451	0.0220014	0.0191692	0.01219	0.007256	0.00956	0.011966
157.92	0.0283766	0.0126494	0.0219836	0.0185486	0.012414	0.006929	0.009613	0.011613
158.16	0.028374	0.0126757	0.0220213	0.0190134	0.011968	0.007052	0.009418	0.012029
158.4	0.0284548	0.0125556	0.0222086	0.0190956	0.012769	0.007072	0.009404	0.012212
158.64	0.0285234	0.0127412	0.0222677	0.0187396	0.012436	0.006976	0.009603	0.011656
158.88	0.0282937	0.0127092	0.0224674	0.018735	0.012389	0.006986	0.009473	0.011612
159.12	0.0286396	0.0130806	0.02279	0.0193622	0.012324	0.00709	0.009622	0.012365
159.36	0.0288039	0.0129274	0.0228101	0.0192183	0.012868	0.006845	0.010185	0.011592
159.6	0.0289735	0.0130467	0.0234686	0.0190608	0.01239	0.00713	0.009631	0.011893
159.84	0.0290332	0.0133649	0.0228687	0.0190389	0.012813	0.007165	0.009202	0.011951
160.08	0.0294008	0.0130924	0.0229382	0.0196078	0.012304	0.007158	0.009666	0.01179
160.32	0.0295416	0.0130997	0.0229888	0.0193264	0.0132	0.007145	0.009651	0.011951
160.56	0.0291049	0.0131206	0.023322	0.0192754	0.012463	0.006879	0.009445	0.011548
160.8	0.0290222	0.0135298	0.0231512	0.0195964	0.012755	0.007256	0.010155	0.012139
161.04	0.0296093	0.0134353	0.0232195	0.0194264	0.012936	0.00709	0.009621	0.011762
161.28	0.0291906	0.0131419	0.0235054	0.019171	0.012476	0.007307	0.009618	0.011972
161.52	0.0298813	0.0133095	0.0233727	0.0196328	0.012475	0.007211	0.009952	0.011973
161.76	0.0300534	0.0134465	0.0235398	0.0196352	0.012874	0.007358	0.009696	0.012018
162	0.0300288	0.0132993	0.0233115	0.0191371	0.013023	0.0073	0.00972	0.012283
162.24	0.0296598	0.0131105	0.0233247	0.0195545	0.012926	0.007114	0.009506	0.011845
162.48	0.0300131	0.0132875	0.0237728	0.0194959	0.012572	0.007294	0.009762	0.011784
162.72	0.0304199	0.0135605	0.0240153	0.0191699	0.012663	0.00743	0.00957	0.011802
162.96	0.0303726	0.0136297	0.0236858	0.0192731	0.012752	0.007344	0.009426	0.01194
163.2	0.030851	0.0134619	0.0238413	0.0195314	0.012149	0.007333	0.009872	0.012059
163.44	0.0303963	0.013378	0.0237563	0.0192408	0.012756	0.007194	0.009402	0.012107
163.68	0.0301148	0.0132595	0.0237703	0.0193978	0.012471	0.007339	0.009892	0.011529
163.92	0.030128	0.0132722	0.0243695	0.0195289	0.012887	0.007214	0.010024	0.012149
164.16	0.0299119	0.0136521	0.0241034	0.0195901	0.012942	0.007391	0.009856	0.011501
164.4	0.03049	0.013834	0.0241829	0.0186937	0.013047	0.007498	0.009714	0.011942
164.64	0.0308482	0.0135878	0.0238908	0.0197153	0.013102	0.007856	0.009609	0.01184
164.88	0.0311275	0.0138564	0.024053	0.0194625	0.012623	0.007226	0.009928	0.012274
165.12	0.0309994	0.0140116	0.0240081	0.0194064	0.012676	0.007582	0.009852	0.011698
165.36	0.0307249	0.0135149	0.0244066	0.0190675	0.012548	0.00742	0.010099	0.011708
165.6	0.0303099	0.0138659	0.0239522	0.0197156	0.012653	0.007562	0.009904	0.011632
165.84	0.0314121	0.0138867	0.0245685	0.0201187	0.012903	0.007447	0.009859	0.012101
166.08	0.0311415	0.0136651	0.0242613	0.0197313	0.012878	0.00746	0.009667	0.012021
166.32	0.0308613	0.0137061	0.0244445	0.0194576	0.012725	0.007318	0.009795	0.011854
166.56	0.0312623	0.0137788	0.0245032	0.0200025	0.012619	0.007498	0.009761	0.011747
166.8	0.0314265	0.0138904	0.0245829	0.0193087	0.013111	0.007684	0.010202	0.011893
167.04	0.0313686	0.0137882	0.0245518	0.0194613	0.012858	0.007446	0.009531	0.012002
167.28	0.0300373	0.0135686	0.0244008	0.0192167	0.012434	0.00757	0.009772	0.012037
167.52	0.0308677	0.0133884	0.0245471	0.0196438	0.012848	0.007418	0.009835	0.012043
167.76	0.0309193	0.0135717	0.0244274	0.0195973	0.012681	0.007416	0.009827	0.011792
168	0.0309819	0.0135063	0.0244776	0.01963	0.012794	0.007617	0.010318	0.012134
168.24	0.0313594	0.0134041	0.0245474	0.0197344	0.01313	0.007625	0.009739	0.011995
168.48	0.0317216	0.0138953	0.0246707	0.0197365	0.013125	0.007666	0.010195	0.011997
168.72	0.0316778	0.0137318	0.0248631	0.0193964	0.012961	0.007646	0.009865	0.011959
168.96	0.0312806	0.0137421	0.0247039	0.0195925	0.01273	0.007789	0.009913	0.012078
169.2	0.0316729	0.0136381	0.0247335	0.0194675	0.012516	0.007897	0.010083	0.011817
169.44	0.0318083	0.0136249	0.0249431	0.0195407	0.012936	0.007664	0.00984	0.011944
169.68	0.0312543	0.0137213	0.0246455	0.0196268	0.01259	0.007614	0.010002	0.011675
169.92	0.0319051	0.0139349	0.0246488	0.0198841	0.012779	0.0078	0.010087	0.011614
170.16	0.0318371	0.0139037	0.0249908	0.0200371	0.012905	0.007585	0.010037	0.012189
170.4	0.0316837	0.0135399	0.025225	0.0188855	0.012752	0.007671	0.009886	0.012045
170.64	0.0317338	0.0139809	0.0249061	0.0201723	0.012656	0.007908	0.010046	0.011816
170.88	0.0316275	0.0141741	0.0248625	0.0195646	0.012831	0.007823	0.009943	0.011684
171.12	0.0322103	0.0139476	0.025081	0.0197623	0.012922	0.007743	0.00991	0.012099
171.36	0.0321396	0.013737	0.0248361	0.0197677	0.012723	0.007725	0.010066	0.012352
171.6	0.0311943	0.0138562	0.0247349	0.0194931	0.012806	0.007735	0.009613	0.011684
171.84	0.0315488	0.0138549	0.0253499	0.0190535	0.012745	0.007517	0.01011	0.011731
172.08	0.0318017	0.0136898	0.0245834	0.0195934	0.012854	0.007729	0.010204	0.012128
172.32	0.0322586	0.0138369	0.0247035	0.0197748	0.01298	0.00771	0.009715	0.012042
172.56	0.0318605	0.0136175	0.0249502	0.0198279	0.012709	0.007773	0.00994	0.012106
172.8	0.0320739	0.0137832	0.0249737	0.0197982	0.013007	0.007679	0.009974	0.011958
173.04	0.0322272	0.0136786	0.0254891	0.0196972	0.012527	0.007705	0.009974	0.012084
173.28	0.0319761	0.0138782	0.0248565	0.0196379	0.013305	0.007776	0.009711	0.012208
173.52	0.0317814	0.0136791	0.0250321	0.0193128	0.012963	0.007761	0.010386	0.012231
173.76	0.031683	0.0139742	0.024969	0.0200415	0.012543	0.00767	0.010297	0.011854
174	0.0318295	0.0141431	0.0245585	0.0194789	0.0131	0.008074	0.010205	0.012132
174.24	0.0321403	0.0141921	0.0253339	0.0194235	0.012885	0.007943	0.009937	0.012071
174.48	0.0320718	0.0138531	0.0248026	0.0198357	0.013215	0.007663	0.010047	0.012181
174.72	0.0323457	0.0139251	0.0251819	0.019389	0.012521	0.007983	0.009845	0.012235
174.96	0.0321838	0.0138278	0.0254261	0.019291	0.012765	0.007866	0.010159	0.011424
175.2	0.0323609	0.0138344	0.0251898	0.0196877	0.012865	0.007872	0.009814	0.011947
175.44	0.0322763	0.0135354	0.0251521	0.0192226	0.012592	0.00819	0.009775	0.011879
175.68	0.032472	0.0138508	0.025008	0.0193373	0.013011	0.008079	0.01008	0.012106
175.92	0.0325194	0.0139212	0.0248385	0.0192837	0.012939	0.007669	0.01026	0.012121
176.16	0.0325056	0.01418	0.0253332	0.0191365	0.012994	0.007808	0.009931	0.012025
176.4	0.0323811	0.0136785	0.0251372	0.0198319	0.012726	0.007797	0.010561	0.011954
176.64	0.0325245	0.0137622	0.0252042	0.0191525	0.012801	0.008123	0.01038	0.011707
176.88	0.0324724	0.0136418	0.0251113	0.0191906	0.012787	0.008119	0.010056	0.01196
177.12	0.0324878	0.0139168	0.0247473	0.019706	0.012932	0.007997	0.010021	0.012237
177.36	0.0325802	0.0142012	0.024949	0.0192977	0.013096	0.007956	0.010239	0.011843
177.6	0.0320519	0.0138424	0.0254025	0.019337	0.012686	0.007874	0.010163	0.012046
177.84	0.0322123	0.0137814	0.0252763	0.018979	0.013192	0.008028	0.009818	0.01181
178.08	0.0324708	0.0138323	0.0250001	0.0196638	0.01267	0.008146	0.010155	0.011752
178.32	0.0322385	0.0137751	0.0251826	0.0193933	0.012997	0.008059	0.010054	0.012204
178.56	0.0324852	0.0136416	0.0250533	0.0188688	0.013151	0.00782	0.010288	0.011994
178.8	0.0329744	0.0138287	0.0250029	0.0194396	0.012794	0.008251	0.010364	0.011905
179.04	0.0327592	0.0138131	0.0251354	0.0188897	0.013197	0.007864	0.010022	0.012191
179.28	0.0324013	0.0138511	0.0253463	0.0195463	0.012885	0.008008	0.010199	0.012013
179.52	0.0325045	0.013952	0.0251634	0.0197725	0.013011	0.008068	0.010136	0.011839
179.76	0.0323906	0.0137931	0.025132	0.0184259	0.012944	0.008193	0.010023	0.011384
180	0.0326998	0.0138646	0.0253193	0.0194262	0.012931	0.008137	0.010519	0.01167
180.24	0.0325631	0.013975	0.0253412	0.0187842	0.013438	0.0081	0.010156	0.012076
180.48	0.033061	0.0138992	0.0248593	0.0195329	0.012839	0.008298	0.010404	0.011709
180.72	0.0323865	0.0137212	0.0248823	0.0195298	0.013012	0.008146	0.010227	0.011955
180.96	0.0326293	0.0139704	0.0250091	0.019544	0.012696	0.008134	0.010408	0.011649
181.2	0.0323426	0.0138598	0.0247803	0.0188273	0.012973	0.008031	0.010017	0.011958
181.44	0.032652	0.0137032	0.0254839	0.0189581	0.013316	0.007811	0.010372	0.011851
181.68	0.0330794	0.0138401	0.0255751	0.0198577	0.012739	0.007967	0.010572	0.011974
181.92	0.0327478	0.0138122	0.0250498	0.0195088	0.013226	0.008143	0.010202	0.012188
182.16	0.0327898	0.0138591	0.0252327	0.019164	0.013361	0.008075	0.01004	0.011977
182.4	0.0328005	0.0135911	0.0253853	0.0195564	0.013079	0.008257	0.010311	0.011585
182.64	0.0327641	0.0137422	0.0254937	0.0194005	0.012955	0.008013	0.009977	0.011461
182.88	0.0327978	0.0136738	0.0253512	0.0189239	0.01288	0.008553	0.010141	0.012119
183.12	0.0324154	0.0138208	0.0252988	0.0190333	0.013219	0.008206	0.009994	0.011665
183.36	0.0324733	0.0130986	0.0255241	0.0199896	0.012871	0.008294	0.010281	0.011827
183.6	0.0332228	0.0137112	0.0250944	0.0187765	0.012477	0.008346	0.01049	0.012353
183.84	0.0329558	0.0136235	0.0249144	0.0190499	0.012893	0.008374	0.010196	0.012197
184.08	0.0327649	0.0135947	0.0255778	0.019498	0.012642	0.008439	0.010385	0.011782
184.32	0.0331276	0.0136121	0.0253664	0.0192113	0.012949	0.008151	0.01039	0.011513
184.56	0.032996	0.0137899	0.0252818	0.0192581	0.013132	0.00778	0.010191	0.012145
184.8	0.033048	0.0136999	0.025122	0.0190747	0.013227	0.008349	0.010416	0.011912
185.04	0.0329955	0.0135853	0.0252804	0.0190973	0.013249	0.008368	0.009905	0.011624
185.28	0.0333692	0.0140363	0.0253687	0.019339	0.013149	0.008318	0.010694	0.012161
185.52	0.0327803	0.013523	0.0252254	0.0190652	0.013217	0.008286	0.01043	0.011801
185.76	0.0330985	0.0135522	0.0252337	0.0189987	0.013091	0.008201	0.009889	0.011843
186	0.0326859	0.0135329	0.0254072	0.0189119	0.013071	0.008236	0.010154	0.011817
186.24	0.0329668	0.013758	0.0253438	0.0191458	0.012999	0.00811	0.010313	0.012008
186.48	0.0328996	0.0133423	0.0250467	0.0191309	0.01301	0.008118	0.00997	0.011902
186.72	0.0330087	0.0133119	0.0251586	0.0189182	0.013019	0.008286	0.010328	0.01206
186.96	0.032861	0.0135947	0.0248679	0.0190637	0.013464	0.008543	0.009967	0.012168
187.2	0.0333684	0.0133839	0.0253997	0.0190116	0.0132	0.008389	0.010418	0.011716
187.44	0.0333261	0.0138884	0.0251888	0.0187155	0.013631	0.008435	0.010159	0.011971
187.68	0.0327467	0.0135386	0.025378	0.0185004	0.013149	0.008025	0.010033	0.01202
187.92	0.032639	0.0137965	0.0253139	0.0186787	0.013743	0.008176	0.010127	0.012071
188.16	0.0329106	0.0136048	0.0256803	0.0191433	0.013238	0.008267	0.01079	0.011718
188.4	0.0329474	0.0132988	0.0253136	0.0189063	0.013179	0.00827	0.010428	0.011709
188.64	0.0327924	0.0130994	0.0252632	0.0190867	0.013258	0.008498	0.010619	0.011733
188.88	0.0328554	0.0135819	0.0254531	0.0193222	0.01264	0.008069	0.010112	0.011945
189.12	0.0340229	0.0133483	0.0251968	0.0187982	0.012847	0.008499	0.0105	0.011836
189.36	0.0333665	0.013275	0.0251926	0.0189996	0.013111	0.008622	0.01033	0.012081
189.6	0.0331661	0.0134601	0.0250327	0.0189138	0.013019	0.008321	0.009907	0.012018
189.84	0.0331571	0.0133614	0.0251276	0.0189815	0.013255	0.008324	0.010346	0.0123
190.08	0.0329432	0.0135484	0.0249967	0.0188736	0.013624	0.008469	0.009942	0.011966
190.32	0.0325901	0.0133216	0.0251625	0.0188447	0.01295	0.008373	0.010182	0.011843
190.56	0.0329021	0.0135941	0.0254134	0.0185917	0.012823	0.008357	0.010265	0.011854
190.8	0.0333408	0.0134792	0.0251562	0.0185902	0.012915	0.008348	0.010405	0.011969
191.04	0.0334112	0.013481	0.0252199	0.0188884	0.013431	0.008488	0.010184	0.011495
191.28	0.033115	0.0131629	0.0251963	0.0189844	0.013298	0.008461	0.010123	0.011693
191.52	0.032964	0.0134717	0.0251759	0.0188333	0.013382	0.008617	0.010513	0.011732
191.76	0.0329181	0.0135493	0.0251937	0.0191351	0.012949	0.00841	0.010054	0.011695
192	0.032911	0.0135566	0.0252146	0.0190758	0.01333	0.008104	0.010556	0.011806
192.24	0.0331048	0.0131202	0.0250537	0.018825	0.013005	0.008336	0.010325	0.011602
192.48	0.033009	0.0131492	0.0251886	0.0188226	0.013397	0.008445	0.010374	0.011661
192.72	0.0333119	0.0133915	0.0250144	0.0188351	0.012997	0.008305	0.01011	0.011926
192.96	0.0336094	0.0135045	0.0251386	0.0191687	0.013194	0.008748	0.010074	0.012238
193.2	0.0331654	0.0132874	0.0252427	0.0190809	0.01299	0.008368	0.010417	0.012308
193.44	0.0326478	0.0132238	0.0249633	0.0186221	0.013216	0.008344	0.010602	0.011871
193.68	0.0327445	0.0131989	0.0250965	0.0186982	0.013601	0.008684	0.010626	0.011851
193.92	0.0332248	0.0134081	0.0252977	0.0186761	0.013199	0.008616	0.010191	0.011834
194.16	0.0332633	0.0134316	0.0248336	0.0184641	0.013176	0.008743	0.009756	0.01161
194.4	0.0335256	0.0133771	0.0252458	0.0189524	0.012992	0.008545	0.010081	0.01143
194.64	0.0330813	0.0132867	0.0248713	0.0181925	0.012957	0.008522	0.010172	0.012099
194.88	0.0331844	0.0134494	0.0254076	0.0187551	0.013179	0.00826	0.010227	0.011795
195.12	0.0329352	0.013245	0.0250584	0.0184162	0.012869	0.008542	0.010236	0.012057
195.36	0.0332443	0.0132398	0.0254536	0.0185131	0.013583	0.008784	0.010593	0.011617
195.6	0.0330815	0.0133226	0.0251056	0.0181385	0.013438	0.008488	0.010567	0.011895
195.84	0.0334032	0.0135773	0.0255238	0.0183489	0.013476	0.00828	0.010514	0.011503
196.08	0.0336537	0.0133927	0.0253405	0.0190806	0.013073	0.008394	0.010486	0.011675
196.32	0.0335756	0.0131135	0.0252204	0.0189673	0.013092	0.008626	0.010305	0.011603
196.56	0.0332015	0.01361	0.0252143	0.0190697	0.013434	0.008501	0.010159	0.011719
196.8	0.0332307	0.0133081	0.02514	0.0184466	0.012793	0.008608	0.010693	0.011724
197.04	0.032869	0.0133907	0.0251719	0.0185325	0.013184	0.00842	0.010407	0.011704
197.28	0.0335955	0.013757	0.0247698	0.0184805	0.013005	0.008489	0.010493	0.011943
197.52	0.0333925	0.0133918	0.0252068	0.0182478	0.013074	0.008465	0.010603	0.012054
197.76	0.0332444	0.0129872	0.0250561	0.0180497	0.013411	0.008888	0.01051	0.011954
198	0.0332184	0.0131534	0.0251622	0.0183249	0.01335	0.008621	0.010507	0.011887
198.24	0.0333425	0.0131458	0.0249417	0.0185335	0.013171	0.008794	0.01001	0.01188
198.48	0.0334296	0.0132443	0.0254316	0.0188071	0.0137	0.008449	0.01021	0.011868
198.72	0.0329609	0.013035	0.0251702	0.0188134	0.013166	0.008316	0.010288	0.01158
198.96	0.0331344	0.013222	0.0250832	0.0182476	0.013444	0.00859	0.010449	0.011702
199.2	0.0331547	0.0131029	0.0248743	0.0184714	0.012695	0.008825	0.010596	0.011819
199.44	0.0333022	0.0130294	0.0247649	0.0182903	0.013012	0.00867	0.010569	0.011986
199.68	0.0333838	0.0132597	0.0251315	0.0180512	0.013196	0.008508	0.010447	0.011679
199.92	0.0334099	0.0128431	0.0249603	0.0181534	0.012862	0.008389	0.010371	0.011906
200.16	0.0338027	0.012855	0.0247828	0.0181731	0.013439	0.008672	0.010083	0.012368
200.4	0.0333702	0.0132876	0.0252319	0.0186693	0.013556	0.008443	0.010475	0.012035
200.64	0.0334954	0.0131184	0.0248018	0.0178783	0.013097	0.00893	0.010295	0.011801
200.88	0.03352	0.0133378	0.0254888	0.0181982	0.013032	0.008326	0.010564	0.01191
201.12	0.0334079	0.0131261	0.0251863	0.0175703	0.013276	0.008338	0.010444	0.012139
201.36	0.0336176	0.0135382	0.0252413	0.0186003	0.013003	0.008595	0.010178	0.012046
201.6	0.032896	0.0131759	0.0251281	0.0181576	0.013145	0.008764	0.010562	0.011924
201.84	0.0333114	0.0130075	0.0251348	0.0185247	0.012852	0.008332	0.010462	0.011573
202.08	0.0331906	0.0128971	0.0248313	0.018452	0.013118	0.00855	0.010536	0.011932
202.32	0.0331129	0.0128989	0.0248929	0.0185273	0.01314	0.008452	0.010398	0.011879
202.56	0.0333331	0.0131637	0.024907	0.0181002	0.013772	0.008589	0.010608	0.011574
202.8	0.0331491	0.0131595	0.0251479	0.0178796	0.013022	0.008567	0.01051	0.011961
203.04	0.0333751	0.0129249	0.0249829	0.0176763	0.013114	0.008485	0.010485	0.012094
203.28	0.0336953	0.013238	0.0249492	0.0183716	0.012887	0.008441	0.009989	0.01218
203.52	0.0335354	0.0129881	0.025028	0.018562	0.012996	0.008642	0.010406	0.011698
203.76	0.0329341	0.0128916	0.024764	0.0185633	0.012989	0.008983	0.010254	0.011715
204	0.0333553	0.0131033	0.0248836	0.0181068	0.013461	0.008787	0.010289	0.011961
204.24	0.0334681	0.0129821	0.0248321	0.0178142	0.013285	0.008577	0.010317	0.011787
204.48	0.0332909	0.0133752	0.0251312	0.0184223	0.012752	0.008648	0.010367	0.011954
204.72	0.0332569	0.0130896	0.0251207	0.0180004	0.013232	0.008738	0.010149	0.011591
204.96	0.0333544	0.0131448	0.0248617	0.0184834	0.013152	0.008833	0.010355	0.011927
205.2	0.0335973	0.0133702	0.0246834	0.0178504	0.013112	0.008638	0.010664	0.011849
205.44	0.0331587	0.0129096	0.0249244	0.0176327	0.012758	0.008842	0.010955	0.011461
205.68	0.0333001	0.0130557	0.0248702	0.0178968	0.012997	0.00872	0.010177	0.011751
205.92	0.0334796	0.0131456	0.0250929	0.0177202	0.013255	0.00848	0.010046	0.01179
206.16	0.0330372	0.0130638	0.0246467	0.0177041	0.013361	0.008717	0.010314	0.012002
206.4	0.0332405	0.0128755	0.0251289	0.0183886	0.013566	0.008528	0.010287	0.011631
206.64	0.0334376	0.0128545	0.0249229	0.0175683	0.013115	0.008366	0.010457	0.011799
206.88	0.0333005	0.0127053	0.0247157	0.0179712	0.013296	0.008515	0.010914	0.011528
207.12	0.0336475	0.0126488	0.0251336	0.0183705	0.013057	0.008698	0.010178	0.011838
207.36	0.0333552	0.0128164	0.0251574	0.0181138	0.013344	0.008705	0.010666	0.011535
207.6	0.0334905	0.0128432	0.0249523	0.0180037	0.013351	0.008653	0.01049	0.011552
207.84	0.0333157	0.012883	0.0249084	0.0180366	0.012959	0.008754	0.010511	0.011847
208.08	0.0329143	0.0131146	0.0250561	0.0179247	0.012967	0.008744	0.010313	0.011876
208.32	0.0334007	0.0131305	0.0250004	0.0175018	0.013447	0.008663	0.010561	0.011889
208.56	0.0332151	0.0127317	0.0250386	0.0180904	0.013168	0.008576	0.010487	0.011514
208.8	0.0336361	0.0128738	0.0245893	0.0177549	0.01283	0.008603	0.010741	0.011756
209.04	0.0336246	0.0129595	0.0252119	0.0182138	0.013245	0.008558	0.010417	0.012069
209.28	0.032875	0.0124828	0.0242931	0.0181193	0.013223	0.008663	0.010576	0.011982
209.52	0.0327318	0.0125025	0.0251103	0.0183096	0.012967	0.008529	0.01031	0.011825
209.76	0.0331422	0.0125994	0.024637	0.0178741	0.013376	0.008729	0.010277	0.011509
210	0.0332052	0.0127694	0.0246426	0.0176613	0.012933	0.008683	0.010291	0.011277
210.24	0.0331258	0.0127245	0.0246573	0.0179125	0.013335	0.008973	0.010736	0.011894
210.48	0.0331369	0.0128358	0.0246957	0.0178492	0.01338	0.008877	0.01041	0.011839
210.72	0.0330536	0.0127688	0.0244601	0.0178169	0.013272	0.008771	0.010223	0.012041
210.96	0.0335424	0.0127694	0.0245305	0.0178479	0.01296	0.008711	0.01024	0.011871
211.2	0.0334799	0.0126266	0.0245354	0.0183987	0.013041	0.008945	0.010362	0.011521
211.44	0.0330436	0.0123735	0.0246841	0.0179725	0.013426	0.009049	0.010563	0.011997
211.68	0.0327544	0.0132767	0.0246686	0.0176443	0.013224	0.008986	0.010404	0.011775
211.92	0.0329012	0.0123915	0.0248404	0.0178703	0.013483	0.009008	0.010408	0.012077
212.16	0.0331268	0.0128675	0.0242492	0.0171522	0.013379	0.008854	0.010734	0.011555
212.4	0.0337929	0.0122733	0.024794	0.0181713	0.012923	0.008739	0.01039	0.011595
212.64	0.0332191	0.0125803	0.0246554	0.0179411	0.013564	0.008812	0.010636	0.011725
212.88	0.033252	0.0124641	0.0243943	0.0176921	0.01298	0.008803	0.010291	0.011714
213.12	0.0329143	0.012579	0.0247475	0.0172043	0.0131	0.008839	0.010526	0.011726
213.36	0.0330678	0.0125206	0.0248565	0.0172974	0.013073	0.008904	0.01045	0.011625
213.6	0.0335394	0.0125514	0.0247198	0.0180555	0.012999	0.008862	0.009977	0.011664
213.84	0.0337805	0.0127741	0.0247214	0.0177557	0.013328	0.008799	0.010492	0.011798
214.08	0.033633	0.0126305	0.0244763	0.0177894	0.013072	0.00863	0.010361	0.012007
214.32	0.0331095	0.0126066	0.0242817	0.017623	0.013442	0.008701	0.010403	0.011772
214.56	0.033419	0.0125941	0.0244081	0.0181551	0.012942	0.00914	0.010158	0.011775
214.8	0.0332405	0.0126649	0.0247371	0.0176736	0.012916	0.008808	0.010517	0.011708
215.04	0.0334696	0.0127725	0.0248826	0.0180428	0.013147	0.00893	0.010558	0.011704
215.28	0.0332943	0.0125473	0.0244714	0.0177349	0.013223	0.008936	0.010223	0.011593
215.52	0.0329868	0.0125984	0.0244641	0.0179512	0.01345	0.008802	0.010432	0.011714
215.76	0.0332469	0.012774	0.0242651	0.0174927	0.012662	0.008793	0.010478	0.011696
216	0.033318	0.0126223	0.024451	0.0179457	0.012878	0.008987	0.010244	0.011801
216.24	0.0334116	0.0125802	0.024788	0.0178587	0.013025	0.008959	0.010679	0.011543
216.48	0.0329235	0.0124597	0.0246927	0.0174444	0.013413	0.008911	0.010498	0.011504
216.72	0.0332841	0.012881	0.0247051	0.0174928	0.013062	0.008858	0.010675	0.011675
216.96	0.032792	0.0123538	0.0245879	0.0174401	0.013463	0.008754	0.010457	0.011653
217.2	0.0329565	0.0129925	0.0240927	0.0176532	0.012862	0.008975	0.010718	0.011483
217.44	0.0329317	0.0124168	0.0246009	0.0175671	0.013419	0.008836	0.00999	0.011964
217.68	0.033069	0.0127011	0.0243481	0.0174935	0.01304	0.008794	0.010089	0.011683
217.92	0.0333339	0.01215	0.0245901	0.0177111	0.013045	0.00883	0.010385	0.012056
218.16	0.033335	0.012348	0.0246051	0.0176876	0.013127	0.008943	0.010201	0.011451
218.4	0.0328599	0.0125523	0.0244093	0.0170561	0.012574	0.00903	0.010314	0.011945
218.64	0.0331342	0.0126931	0.0247681	0.0173636	0.013624	0.008919	0.010407	0.011815
218.88	0.0328125	0.012386	0.0244278	0.018129	0.013179	0.008764	0.010367	0.011558
219.12	0.0334206	0.0123661	0.0245259	0.0176632	0.01261	0.008857	0.010683	0.011482
219.36	0.0329417	0.0127273	0.0244107	0.0178703	0.013078	0.008913	0.010667	0.011644
219.6	0.0329334	0.0123776	0.0243733	0.0177433	0.013132	0.008737	0.010317	0.011793
219.84	0.0332551	0.0121486	0.0245239	0.0173729	0.012645	0.008804	0.010266	0.011669
220.08	0.0333584	0.0122871	0.0241887	0.0175123	0.013107	0.008945	0.010612	0.011509
220.32	0.0327276	0.0125685	0.0243351	0.0176408	0.012752	0.008833	0.010131	0.011768
220.56	0.0330552	0.0124074	0.0242191	0.0175161	0.013182	0.009002	0.010317	0.011876
220.8	0.0331962	0.0121588	0.0244003	0.0176435	0.013029	0.008469	0.010662	0.011911
221.04	0.0331107	0.0123553	0.0244035	0.0177921	0.013418	0.008771	0.010687	0.011533
221.28	0.0331628	0.0123114	0.024211	0.0174961	0.012939	0.009021	0.010429	0.012044
221.52	0.0331751	0.0122293	0.0241214	0.0173749	0.013103	0.008803	0.009937	0.012082
221.76	0.0331008	0.0124075	0.0245128	0.0173236	0.012686	0.008602	0.01062	0.01155
222	0.0327375	0.0122099	0.0242067	0.0177518	0.013305	0.008661	0.010375	0.011475
222.24	0.0328763	0.0123844	0.0242436	0.017573	0.013117	0.008773	0.010525	0.011715
222.48	0.0331359	0.0123195	0.0243256	0.0170523	0.013185	0.008911	0.010455	0.011671
222.72	0.0332849	0.0123038	0.0243601	0.0172934	0.013735	0.008942	0.010313	0.011572
222.96	0.0332434	0.0123663	0.0242167	0.0172062	0.013375	0.008863	0.010283	0.012023
223.2	0.0329327	0.0122698	0.0243765	0.0177003	0.013593	0.008742	0.010764	0.011815
223.44	0.0327058	0.0121191	0.0238429	0.017641	0.013382	0.008768	0.010195	0.011655
223.68	0.0324668	0.0124253	0.0241973	0.0173229	0.013003	0.008833	0.010227	0.011361
223.92	0.0331378	0.0120462	0.0244765	0.0174215	0.012905	0.008906	0.010456	0.011745
224.16	0.0331191	0.0122342	0.024304	0.0178137	0.013307	0.008846	0.010169	0.011674
224.4	0.0333385	0.0122929	0.0236465	0.0176583	0.013528	0.008844	0.010668	0.011519
224.64	0.0328461	0.0120517	0.0242318	0.0172654	0.013568	0.008802	0.010474	0.011693
224.88	0.033437	0.0120369	0.0238927	0.0171584	0.013321	0.008793	0.010324	0.011504
225.12	0.0331383	0.0123879	0.0243705	0.0171661	0.013081	0.008939	0.010201	0.012003
225.36	0.0332738	0.0122648	0.0240278	0.0175189	0.01293	0.008777	0.010198	0.011326
225.6	0.0328003	0.0121701	0.0240552	0.0174698	0.013125	0.008812	0.010045	0.011817
225.84	0.0331065	0.0123136	0.0243352	0.0171947	0.013396	0.008798	0.010347	0.012018
226.08	0.0328113	0.0124129	0.0242454	0.0171526	0.013023	0.008901	0.010336	0.011326
226.32	0.0328214	0.0121813	0.0239231	0.0172794	0.013177	0.008986	0.010354	0.011449
226.56	0.0327896	0.0123946	0.0242357	0.0165932	0.012991	0.008944	0.010625	0.011425
226.8	0.0330292	0.0122162	0.0239535	0.0172814	0.012872	0.008909	0.010216	0.011351
227.04	0.0329807	0.0121903	0.0241058	0.0168172	0.012766	0.009102	0.010374	0.011667
227.28	0.0329742	0.01206	0.0240679	0.017588	0.013013	0.009162	0.010421	0.011504
227.52	0.032968	0.0119479	0.0243931	0.0169379	0.012874	0.008824	0.010379	0.011416
227.76	0.03335	0.0121354	0.0241431	0.0174267	0.01332	0.008976	0.010442	0.011826
228	0.0331237	0.0123667	0.0239783	0.0169977	0.013147	0.00871	0.010173	0.011292
228.24	0.0326787	0.0120766	0.0243214	0.0170942	0.01269	0.008924	0.010359	0.011319
228.48	0.0330036	0.0119061	0.0239583	0.0170133	0.012882	0.008459	0.010694	0.011332
228.72	0.0327486	0.0120661	0.0238751	0.0171169	0.013654	0.00896	0.010525	0.011768
228.96	0.0325342	0.0120318	0.0241125	0.0172443	0.013265	0.009076	0.010729	0.011651
229.2	0.0329883	0.0123348	0.0246169	0.0167519	0.013344	0.008745	0.010343	0.011583
229.44	0.0332479	0.0123887	0.0239456	0.0167909	0.013154	0.009015	0.010593	0.011322
229.68	0.0325195	0.0124014	0.0240571	0.0175324	0.013216	0.008759	0.010568	0.011301
229.92	0.0328738	0.0122809	0.02395	0.0169594	0.013309	0.008937	0.01042	0.011832
230.16	0.0327877	0.0118806	0.0239718	0.017315	0.013385	0.00885	0.010408	0.011578
230.4	0.0324911	0.0121157	0.0237405	0.0173014	0.013064	0.008999	0.010488	0.011648
230.64	0.0329494	0.0119955	0.0240001	0.0171858	0.012949	0.008937	0.010328	0.012041
230.88	0.0326268	0.0119662	0.0243026	0.0170652	0.013156	0.008896	0.010503	0.011593
231.12	0.0325624	0.0123592	0.024151	0.0173687	0.013022	0.008895	0.010717	0.011581
231.36	0.0325972	0.0123347	0.0236607	0.016913	0.01313	0.008904	0.010659	0.011847
231.6	0.0328939	0.0120448	0.0239291	0.0170084	0.013561	0.008933	0.010708	0.011164
231.84	0.0327329	0.0122003	0.0240445	0.0168365	0.012782	0.008964	0.010835	0.011475
232.08	0.0324543	0.0117871	0.0238867	0.0170676	0.013291	0.008968	0.01066	0.011506
232.32	0.0330287	0.0122311	0.0239443	0.0165548	0.013548	0.008888	0.010578	0.011615
232.56	0.0329089	0.0121128	0.0242061	0.0175268	0.013155	0.009006	0.010218	0.011505
232.8	0.0330495	0.0119876	0.0237222	0.016918	0.013327	0.009013	0.010316	0.011448
233.04	0.0330273	0.0118406	0.024028	0.0168459	0.013242	0.00909	0.010199	0.011365
233.28	0.0330267	0.012097	0.0239346	0.0171283	0.013246	0.009043	0.010747	0.011472
233.52	0.0331883	0.0117686	0.0238845	0.0168872	0.013136	0.008756	0.01025	0.011834
233.76	0.0328624	0.0120407	0.0237532	0.0172076	0.012982	0.009038	0.010669	0.011617
234	0.0332428	0.011753	0.0237418	0.0169227	0.012706	0.008626	0.010228	0.011485
234.24	0.0327003	0.0120729	0.0241348	0.0168642	0.013285	0.008873	0.010365	0.011933
234.48	0.0332575	0.0121228	0.0238984	0.0170853	0.012801	0.008923	0.010549	0.011332
234.72	0.0330882	0.0118405	0.0236267	0.0165694	0.013178	0.008571	0.010518	0.011396
234.96	0.0322424	0.0119517	0.0236738	0.0168296	0.013175	0.008976	0.01037	0.011465
235.2	0.0326065	0.0119252	0.0237123	0.0168934	0.01319	0.009005	0.009917	0.011176
235.44	0.0327952	0.0116803	0.0237846	0.0169343	0.013511	0.008791	0.010537	0.01171
235.68	0.0325215	0.0118863	0.0238665	0.0173921	0.012991	0.008799	0.010433	0.011543
235.92	0.0327867	0.0120878	0.0239787	0.0169881	0.01318	0.009181	0.010376	0.011542
236.16	0.0325228	0.0119826	0.02341	0.0173529	0.013005	0.009117	0.010471	0.011523
236.4	0.0329261	0.0120181	0.0235287	0.0170307	0.013139	0.00911	0.010546	0.011473
236.64	0.0331131	0.0120249	0.0237323	0.0172243	0.013211	0.008911	0.010263	0.011619
236.88	0.0330286	0.0118902	0.0237983	0.016629	0.013514	0.008645	0.010145	0.011163
237.12	0.0328401	0.0116323	0.0235119	0.0166253	0.013582	0.008844	0.010484	0.011639
237.36	0.0324422	0.0122534	0.0240123	0.0168848	0.013043	0.009044	0.010001	0.011367
237.6	0.0328662	0.0117602	0.0237413	0.0170177	0.013317	0.008794	0.010218	0.011493
237.84	0.0332393	0.0120774	0.0235449	0.0169165	0.012819	0.008672	0.010777	0.01158
238.08	0.0327216	0.0118576	0.0237275	0.0169804	0.012886	0.008885	0.009853	0.011366
238.32	0.033033	0.0115588	0.0235909	0.0167846	0.013169	0.009132	0.010629	0.011585
238.56	0.032035	0.0117334	0.0237014	0.0164429	0.013041	0.00878	0.010581	0.01169
238.8	0.0329574	0.0118924	0.0239135	0.0165049	0.013127	0.008995	0.010614	0.011383
239.04	0.0325258	0.0117153	0.0236344	0.0167573	0.012722	0.009011	0.010273	0.011439
239.28	0.0324639	0.0119498	0.0236431	0.0169707	0.01315	0.0088	0.010888	0.0113
239.52	0.033037	0.0117656	0.0238778	0.0170744	0.013268	0.009133	0.010264	0.011361
239.76	0.0322361	0.0118389	0.0237828	0.0167547	0.013201	0.008831	0.01038	0.011279

## Sheet: R12 GL
	Nucleotide depleted				plus GTP
Time	Exp1	Exp2	Exp3		Exp1	Exp2	Exp3
0	0.000134	0.000209	0.00025904		0.0001884	0.000269	0.00026
0.24	0.000394	-0.00014	0.00053904		-6.16e-05	5.88e-05	3.05e-05
0.48	0.000414	6.9e-05	0.00016904		0.0001584	0.000299	-5e-05
0.72	3.36e-05	5.9e-05	0.00015904		-0.0001416	0.000359	0.00015
0.96	7.36e-05	0.000159	0.00013904		-2.16e-05	-1.2e-06	0.00012
1.2	0.000104	0.000189	0.00016904		-0.0002216	2.88e-05	-0.00026
1.44	-3.6e-05	-0.00021	0.00014904		-0.0001316	-9.12e-05	4.05e-05
1.68	0.000204	1.9e-05	0.00029904		-0.0001016	0.000189	1.05e-05
1.92	0.000164	9.04e-06	0.00022904		-4.16e-05	-1.12e-05	0.00024
2.16	0.000164	2.9e-05	0.00032904		-1.6e-06	-0.000131	0.00035
2.4	-0.00022	-3.1e-05	5.904e-05		-9.16e-05	-1.12e-05	7.05e-05
2.64	-0.00027	3.9e-05	0.00023904		-2.16e-05	4.88e-05	-0.00017
2.88	6.36e-05	4.9e-05	3.904e-05		8.84e-05	-3.12e-05	-0.00025
3.12	-0.00018	0.000149	0.00036904		-0.0001316	-2.12e-05	6.05e-05
3.36	-0.00032	0.000249	0.00016904		0.0002584	3.88e-05	-9.5e-06
3.6	-0.00018	0.000219	0.00020904		-0.0003616	0.000109	1.05e-05
3.84	-4.6e-05	0.000199	0.00033904		-0.0003116	-0.000111	1.05e-05
4.08	-8.6e-05	3.9e-05	2.904e-05		-0.0003716	0.000149	0.00013
4.32	0.000114	0.000119	0.00021904		0.0001784	0.000239	0.00015
4.56	-4.6e-05	2.9e-05	7.904e-05		-0.0001516	-1.2e-06	0.00023
4.8	-0.00045	7.9e-05	0.00025904		0.0002284	3.88e-05	5.05e-05
5.04	-0.00015	0.000229	0.00018904		9.84e-05	2.88e-05	7.05e-05
5.28	0.000184	9.9e-05	-0.00020096		-0.0001116	7.88e-05	5.05e-05
5.52	0.000104	-5.1e-05	0.00031904		-0.0001216	-0.000101	0.00013
5.76	0.000294	-0.0001	0.00027904		0.0001884	3.88e-05	0.0002
6	6.36e-05	-9.1e-05	-5.096e-05		-0.0001716	2.88e-05	0.00032
6.24	-3.6e-05	-0.00021	0.00022904		3.84e-05	-4.12e-05	1.05e-05
6.48	-5.6e-05	-4.1e-05	0.00030904		0.0002084	-3.12e-05	3.05e-05
6.72	-7.6e-05	1.9e-05	0.00029904		0.0001184	9.88e-05	2.05e-05
6.96	0.000224	0.000179	-7.096e-05		-1.16e-05	9.88e-05	-5e-05
7.2	-0.00032	9.04e-06	0.00021904		-0.0003416	0.000289	0.00017
7.44	3.36e-05	0.000249	0.00024904		0.0001184	0.000219	0.00021
7.68	0.000224	0.000139	0.00012904		-0.0001116	-1.2e-06	0.00021
7.92	0.000184	-0.00014	0.00014904		-1.6e-06	-7.12e-05	0.00025
8.16	-0.00026	6.9e-05	7.904e-05		-1.16e-05	-0.000181	-8e-05
8.4	5.36e-05	0.000199	0.00017904		-0.0001716	0.000219	0.0001
8.64	-0.00014	5.9e-05	0.00024904		-0.0001216	4.88e-05	-0.00019
8.88	0.000234	0.000239	-9.6e-07		-2.16e-05	-0.000201	0.00011
9.12	9.36e-05	6.9e-05	0.00026904		-9.16e-05	-4.12e-05	-2e-05
9.36	-5.6e-05	-7.1e-05	0.00026904		-0.0002016	5.88e-05	0.00043
9.6	0.000194	-3.1e-05	0.00013904		-0.0001916	-0.000221	0.00023
9.84	-0.00015	0.000159	8.904e-05		-5.16e-05	-2.12e-05	7.05e-05
10.08	6.36e-05	7.9e-05	5.904e-05		7.84e-05	0.000149	0.00022
10.32	-0.00012	3.9e-05	0.00014904		-6.16e-05	-4.12e-05	9.05e-05
10.56	-9.6e-05	0.000109	0.00039904		8.4e-06	-0.000101	5.05e-05
10.8	0.000304	-5.1e-05	0.00011904		-0.0001016	-5.12e-05	-0.00013
11.04	0.000164	0.000139	0.00016904		-0.0002416	-4.12e-05	0.00013
11.28	-0.00015	-9.6e-07	0.00015904		7.84e-05	-6.12e-05	0.00011
11.52	0.000154	0.000169	0.00029904		-0.0002016	0.000119	-0.00015
11.76	0.000164	0.000339	0.00020904		9.84e-05	0.000279	0.00013
12	-0.00034	6.9e-05	0.00013904		-6.16e-05	-6.12e-05	1.05e-05
12.24	3.36e-05	-1.1e-05	0.00016904		0.0003384	-4.12e-05	-3e-05
12.48	-5.6e-05	0.000269	-0.00024096		0.0002684	6.88e-05	2.05e-05
12.72	9.36e-05	9.04e-06	0.00029904		0.0001884	0.000149	0.00019
12.96	5.36e-05	0.000299	0.00026904		0.0001184	-2.12e-05	4.05e-05
13.2	-0.00013	6.9e-05	0.00023904		0.0001284	-0.000351	4.8e-07
13.44	-0.00012	-0.00035	0.00022904		7.84e-05	-5.12e-05	-0.00023
13.68	0.000184	-0.00015	0.00036904		-0.0003616	-0.000131	0.0001
13.92	-7.6e-05	0.000119	0.00019904		0.0001484	0.000139	0.0002
14.16	0.000224	-0.00011	0.00017904		0.0001384	8.8e-06	7.05e-05
14.4	-0.00019	-0.00029	3.904e-05		-0.0001516	5.88e-05	0.00021
14.64	2.36e-05	0.000129	0.00011904		8.84e-05	-4.12e-05	-4e-05
14.88	0.000164	-0.0002	0.00029904		-0.0002516	-1.12e-05	-8e-05
15.12	0.000264	-0.00011	0.00033904		0.0001484	0.000109	1.05e-05
15.36	0.000144	0.000199	0.00012904		0.0002384	-1.2e-06	9.05e-05
15.6	-5.6e-05	-3.1e-05	0.00018904		4.84e-05	0.000239	-0.00015
15.84	8.36e-05	5.9e-05	0.00015904		-9.16e-05	8.8e-06	-4e-05
16.08	-0.0003	-0.0002	0.00022904		9.84e-05	0.000159	-0.00025
16.32	0.000104	1.9e-05	0.00025904		-6.16e-05	2.88e-05	-7e-05
16.56	-0.00015	8.9e-05	0.00014904		0.0002784	0.000179	0.0001
16.8	0.000254	-0.00012	-0.00014096		0.0001884	0.000169	-0.00014
17.04	0.000104	-0.00019	7.904e-05		0.0003384	0.000189	7.05e-05
17.28	-0.00013	3.9e-05	0.00030904		-7.16e-05	-2.12e-05	-7e-05
17.52	-0.00026	-0.00024	0.00026904		0.0002384	6.88e-05	7.05e-05
17.76	-0.00018	0.000149	9.904e-05		0.0001384	-0.000141	0.00016
18	-4.6e-05	0.000329	0.00011904		-0.0001716	2.88e-05	-0.00011
18.24	0.000264	-0.00023	3.904e-05		-2.16e-05	-7.12e-05	2.05e-05
18.48	9.36e-05	0.000259	0.00023904		-0.0003816	0.000129	-0.00018
18.72	-0.00017	-0.0002	0.00023904		-4.16e-05	-1.2e-06	-4e-05
18.96	0.000224	-8.1e-05	0.00021904		-4.16e-05	-0.000141	-7e-05
19.2	-0.00037	2.9e-05	0.00010904		-0.0002816	-0.000241	-0.00016
19.44	-2.6e-05	-0.00011	-9.6e-07		8.84e-05	0.000119	-0.00016
19.68	-3.6e-05	-0.00028	2.904e-05		-0.0001616	9.88e-05	5.05e-05
19.92	-0.00013	-0.00032	0.00010904		0.0004084	-1.12e-05	-0.00047
20.16	0.000334	2.9e-05	-7.096e-05		0.0004384	0.000169	6.05e-05
20.4	-6.6e-05	-0.00014	0.00030904		-0.0003816	-0.000251	3.05e-05
20.64	0.000114	-0.00017	-0.00016096		-0.0003716	0.000359	4.05e-05
20.88	-0.00031	0.000229	-9.096e-05		5.84e-05	-0.000101	8.05e-05
21.12	-0.00041	0.000219	-9.096e-05		0.0001984	-0.000101	8.05e-05
21.36	-0.00013	-8.1e-05	-1.096e-05		-9.16e-05	-8.12e-05	-0.00024
21.6	-1.6e-05	-0.00017	7.904e-05		-0.0003016	-0.000331	-0.0002
21.84	-6.4e-06	-0.00012	-6.096e-05		0.0002884	0.000189	0.00026
22.08	-2.6e-05	-0.00022	9.04e-06		3.84e-05	6.88e-05	-5e-05
22.32	-6.6e-05	-6.1e-05	-0.00017096		7.84e-05	-0.000221	-8e-05
22.56	-9.6e-05	-2.1e-05	-9.6e-07		0.0002184	-0.000211	-0.00013
22.8	-0.00021	-0.00011	0.00014904		-0.0003316	-0.000151	2.05e-05
23.04	0.000144	-2.1e-05	6.904e-05		-8.16e-05	0.000309	-0.00013
23.28	-7.6e-05	0.000159	-0.00013096		3.84e-05	4.88e-05	8.05e-05
23.52	2.36e-05	-9.6e-07	-3.096e-05		-3.16e-05	5.88e-05	-0.00023
23.76	0.000174	6.9e-05	9.904e-05		-0.0002216	6.88e-05	-0.00024
24	3.6e-06	0.000129	0.00021904		0.0003284	-0.000151	3.05e-05
24.24	-0.00025	6.9e-05	8.904e-05		-6.16e-05	-0.000261	-8e-05
24.48	-6.4e-06	-7.1e-05	-2.096e-05		-3.16e-05	-2.12e-05	-0.00013
24.72	0.000124	-9.1e-05	-2.096e-05		-9.16e-05	-0.000261	4.8e-07
24.96	0.000254	-8.1e-05	0.00031904		0.0002684	-0.000261	-6e-05
25.2	0.000214	3.9e-05	-0.00011096		0.0001484	0.000129	6.05e-05
25.44	0.000134	-0.00014	5.904e-05		8.84e-05	-0.000181	-9e-05
25.68	3.6e-06	-6.1e-05	0.00013904		0.0001784	-1.12e-05	-2e-05
25.92	0.000104	0.000239	0.00033904		-0.0001516	0.000199	-0.00022
26.16	-0.00024	-0.00024	9.904e-05		0.0001484	-0.000281	-0.00012
26.4	-3.6e-05	2.9e-05	0.00015904		0.0002284	-0.000251	1.05e-05
26.64	-0.00034	-8.1e-05	3.904e-05		-6.16e-05	-5.12e-05	0.00019
26.88	-0.0002	-0.00041	0.00013904		-1.6e-06	-0.000371	-0.0001
27.12	0.000164	-0.00021	0.00017904		-0.0002316	0.000109	-0.00027
27.36	-4.6e-05	0.000129	9.04e-06		-7.16e-05	-7.12e-05	-0.00021
27.6	3.6e-06	-0.00023	4.904e-05		-0.0001416	-7.12e-05	5.05e-05
27.84	0.000354	-0.00016	3.904e-05		-5.16e-05	0.000169	-0.00023
28.08	-4.6e-05	-0.00017	1.904e-05		0.0004184	1.88e-05	-0.0003
28.32	-0.00027	-0.00023	9.04e-06		-4.16e-05	0.000149	-0.00029
28.56	0.000404	-0.00011	-9.096e-05		0.0001184	-0.000291	0.00017
28.8	-8.6e-05	4.9e-05	-0.00016096		-0.0002016	-0.000151	-0.00029
29.04	-0.00023	-5.1e-05	-8.096e-05		0.0001384	-0.000181	-0.0002
29.28	6.36e-05	-0.00017	0.00025904		0.0002784	-4.12e-05	-0.00017
29.52	-0.00014	-0.00014	-0.00014096		0.0001184	1.88e-05	-9.5e-06
29.76	-0.00012	0.000159	0.00044904		-5.16e-05	-0.000271	-0.00014
30	0.000304	0.000239	0.00083904		-0.0002016	-0.000211	0.00021
30.24	0.000684	0.000869	0.00111904		-9.16e-05	0.000319	0.00038
30.48	0.000564	0.001139	-0.010331		-6.16e-05	0.000399	0.00052
30.72	-0.00877	-0.00902	-0.057601		-0.0085016	-0.009701	-0.01066
30.96	-0.04613	-0.04862	0.023029		-0.0448216	-0.049571	-0.05529
31.2	0.017124*	0.018759*	-0.01605096*		0.0182484	0.018769	0.02177
31.44	-0.01596	-0.01419	0.00069904		-0.0157016	-0.017361	-0.01882
31.68	-0.00012	0.000699	0.00160904		-0.0006616	-0.000251	-7e-05
31.92	0.000334	0.000559	0.00171904		0.0007684	0.000189	0.00078
32.16	0.001194	0.000679	0.00182904		0.0006084	0.000229	0.00071
32.4	0.000524	0.000699	0.00186904		0.0006484	0.000389	0.00088
32.64	0.000754	0.000849	0.00179904		0.0003584	0.000319	0.00082
32.88	0.000924	0.000899	0.00199904		0.0004784	0.000249	0.0009
33.12	0.000794	0.000859	0.00191904		0.0005384	0.000119	0.00097
33.36	0.000984	0.000769	0.00215904		0.0004284	0.000269	0.00126
33.6	0.000554	0.000829	0.00206904		0.0004384	0.000139	0.00113
33.84	0.001194	0.000759	0.00225904		0.0008984	0.000399	0.00128
34.08	0.000734	0.000729	0.00194904		0.0005784	0.000259	0.00123
34.32	0.000784	0.000739	0.00223904		0.0007284	0.000359	0.0014
34.56	0.000764	0.000619	0.00223904		0.0007284	0.000489	0.00124
34.8	0.001094	0.000819	0.00220904		0.0008284	0.000549	0.00141
35.04	0.001374	0.000879	0.00218904		0.0007984	0.000409	0.0014
35.28	0.001034	0.000819	0.00242904		0.0007584	0.000609	0.00135
35.52	0.001004	0.000769	0.00233904		0.0005084	0.000359	0.00156
35.76	0.001204	0.000849	0.00243904		0.0014284	0.000379	0.00159
36	0.001564	0.000709	0.00267904		0.0005084	0.000309	0.00171
36.24	0.001474	0.000849	0.00255904		0.0008884	0.000379	0.00184
36.48	0.001144	0.000909	0.00238904		0.0005884	0.000439	0.00137
36.72	0.001194	0.000939	0.00254904		0.0009784	0.000429	0.00171
36.96	0.001314	0.001169	0.00252904		0.0009684	0.000599	0.00172
37.2	0.001274	0.000839	0.00264904		0.0011684	0.000699	0.00186
37.44	0.001514	0.001239	0.00274904		0.0010384	0.000329	0.00181
37.68	0.001284	0.001009	0.00253904		0.0009584	0.000659	0.00179
37.92	0.001264	0.000749	0.00277904		0.0008984	0.000469	0.00194
38.16	0.001344	0.001059	0.00262904		0.0009784	0.000709	0.00182
38.4	0.001514	0.000929	0.00279904		0.0011284	0.000519	0.00201
38.64	0.001684	0.001259	0.00283904		0.0012784	0.000759	0.00212
38.88	0.001454	0.000819	0.00301904		0.0011784	0.000909	0.00198
39.12	0.001174	0.001139	0.00292904		0.0010184	0.000559	0.00199
39.36	0.001684	0.000839	0.00275904		0.0010984	0.000569	0.00198
39.6	0.001534	0.001259	0.00281904		0.0011784	0.000499	0.00207
39.84	0.001674	0.000899	0.00299904		0.0015584	0.000559	0.00203
40.08	0.001154	0.001089	0.00283904		0.0014884	0.000489	0.00211
40.32	0.001684	0.001059	0.00300904		0.0013984	0.000599	0.002
40.56	0.001994	0.001029	0.00298904		0.0014884	0.000689	0.00203
40.8	0.001594	0.001009	0.00292904		0.0013484	0.000509	0.00186
41.04	0.001674	0.000959	0.00318904		0.0011084	0.000639	0.00237
41.28	0.001664	0.001219	0.00299904		0.0009784	0.000439	0.00236
41.52	0.001624	0.000959	0.00310904		0.0014684	0.000599	0.00222
41.76	0.002054	0.001049	0.00319904		0.0014884	0.000979	0.00225
42	0.001804	0.000969	0.00300904		0.0017284	0.000649	0.00211
42.24	0.001824	0.001089	0.00295904		0.0013084	0.000829	0.00214
42.48	0.002094	0.001089	0.00317904		0.0011984	0.000639	0.00235
42.72	0.001874	0.001239	0.00307904		0.0014484	0.000599	0.00215
42.96	0.001744	0.000969	0.00320904		0.0016484	0.000599	0.0022
43.2	0.001894	0.001379	0.00308904		0.0017984	0.000499	0.00235
43.44	0.002114	0.001249	0.00305904		0.0014384	0.000909	0.00242
43.68	0.002044	0.001119	0.00326904		0.0012084	0.000659	0.00252
43.92	0.001734	0.001269	0.00321904		0.0017584	0.000729	0.00241
44.16	0.001824	0.001169	0.00317904		0.0017184	0.000929	0.0022
44.4	0.001684	0.001379	0.00300904		0.0012084	0.000779	0.00283
44.64	0.001874	0.001219	0.00328904		0.0015384	0.000679	0.00261
44.88	0.002004	0.001249	0.00337904		0.0016184	0.000789	0.00251
45.12	0.002164	0.001359	0.00338904		0.0020484	0.000359	0.00236
45.36	0.001804	0.001289	0.00322904		0.0017784	0.001099	0.00243
45.6	0.001864	0.001599	0.00334904		0.0017784	0.000939	0.00249
45.84	0.001714	0.001269	0.00330904		0.0013784	0.001079	0.00238
46.08	0.001864	0.001239	0.00334904		0.0018084	0.000749	0.00253
46.32	0.002034	0.001399	0.00331904		0.0012484	0.000749	0.00245
46.56	0.001944	0.001369	0.00319904		0.0015984	0.001029	0.00247
46.8	0.001774	0.001359	0.00349904		0.0018984	0.001099	0.00271
47.04	0.001974	0.001209	0.00338904		0.0017884	0.000939	0.00272
47.28	0.001924	0.001279	0.00327904		0.0014884	0.000899	0.00261
47.52	0.002374	0.001129	0.00308904		0.0015884	0.000909	0.00245
47.76	0.001974	0.001319	0.00339904		0.0019084	0.000919	0.00271
48	0.002014	0.001189	0.00345904		0.0020084	0.000749	0.0026
48.24	0.002234	0.001619	0.00348904		0.0017884	0.000879	0.00277
48.48	0.002334	0.001559	0.00338904		0.0015484	0.001189	0.00246
48.72	0.002104	0.001569	0.00356904		0.0014784	0.000959	0.00238
48.96	0.002424	0.001319	0.00369904		0.0019284	0.001019	0.00257
49.2	0.002314	0.001299	0.00332904		0.0019184	0.000769	0.00241
49.44	0.002054	0.001339	0.00346904		0.0017984	0.000949	0.00262
49.68	0.002074	0.001379	0.00351904		0.0022584	0.000699	0.00272
49.92	0.002214	0.001479	0.00354904		0.0016084	0.001019	0.00292
50.16	0.002174	0.001389	0.00321904		0.0017584	0.000789	0.00265
50.4	0.002174	0.001469	0.00350904		0.0011684	0.000569	0.00275
50.64	0.002334	0.001509	0.00362904		0.0016484	0.000889	0.00275
50.88	0.002554	0.001569	0.00353904		0.0018384	0.001039	0.00285
51.12	0.002484	0.001599	0.00349904		0.0019284	0.000799	0.00279
51.36	0.002274	0.001499	0.00345904		0.0019584	0.000839	0.00255
51.6	0.001864	0.001279	0.00368904		0.0017084	0.000799	0.00267
51.84	0.002364	0.001659	0.00339904		0.0014784	0.001189	0.00245
52.08	0.002384	0.001569	0.00371904		0.0019284	0.001109	0.00261
52.32	0.002794	0.001509	0.00350904		0.0021184	0.001009	0.00275
52.56	0.002534	0.001549	0.00357904		0.0016984	0.000919	0.00272
52.8	0.002234	0.001519	0.00342904		0.0020084	0.001249	0.00287
53.04	0.002734	0.001229	0.00355904		0.0017884	0.000979	0.0028
53.28	0.002444	0.001689	0.00353904		0.0021884	0.000939	0.00268
53.52	0.002434	0.001369	0.00368904		0.0019684	0.001269	0.00263
53.76	0.002364	0.001519	0.00364904		0.0018084	0.001219	0.0029
54	0.002404	0.001499	0.00362904		0.0019484	0.001169	0.0028
54.24	0.002524	0.001399	0.00345904		0.0021484	0.001049	0.00259
54.48	0.002354	0.001869	0.00377904		0.0021084	0.000999	0.00279
54.72	0.002474	0.001619	0.00359904		0.0021384	0.001049	0.00302
54.96	0.002194	0.001619	0.00361904		0.0021684	0.000909	0.0029
55.2	0.002704	0.001549	0.00381904		0.0021184	0.001079	0.00255
55.44	0.002684	0.001569	0.00350904		0.0020484	0.001199	0.00312
55.68	0.002434	0.001569	0.00366904		0.0019484	0.001119	0.00282
55.92	0.002334	0.001429	0.00362904		0.0022484	0.001039	0.00279
56.16	0.002624	0.001519	0.00349904		0.0023484	0.001099	0.00275
56.4	0.002454	0.001769	0.00364904		0.0025684	0.000769	0.00271
56.64	0.002544	0.001529	0.00350904		0.0021084	0.001049	0.00285
56.88	0.002594	0.001649	0.00386904		0.0021984	0.001179	0.00283
57.12	0.002604	0.001449	0.00347904		0.0024284	0.000969	0.00286
57.36	0.002664	0.001609	0.00368904		0.0022384	0.001159	0.00292
57.6	0.002664	0.001499	0.00365904		0.0024684	0.001059	0.00265
57.84	0.002504	0.001769	0.00338904		0.0022284	0.001339	0.00293
58.08	0.002634	0.001919	0.00364904		0.0021984	0.001009	0.00267
58.32	0.002724	0.001659	0.00360904		0.0018684	0.001339	0.00287
58.56	0.002674	0.001689	0.00356904		0.0024084	0.001109	0.00259
58.8	0.002744	0.001719	0.00353904		0.0021984	0.000999	0.00286
59.04	0.002854	0.001749	0.00370904		0.0021284	0.001389	0.00289
59.28	0.002254	0.001669	0.00388904		0.0021984	0.001149	0.00288
59.52	0.002454	0.001539	0.00368904		0.0022584	0.001059	0.00281
59.76	0.002664	0.001859	0.00384904		0.0020384	0.001359	0.00309
60	0.002834	0.001429	0.00379904		0.0019184	0.001029	0.00293
60.24	0.002654	0.001519	0.00367904		0.0021084	0.001279	0.00288
60.48	0.002824	0.001619	0.00356904		0.0021184	0.001229	0.00274
60.72	0.002684	0.001809	0.00352904		0.0025084	0.001019	0.00289
60.96	0.002494	0.001469	0.00375904		0.0024184	0.001119	0.00279
61.2	0.003164	0.001479	0.00372904		0.0023184	0.001349	0.00265
61.44	0.002604	0.001719	0.00374904		0.0021084	0.001219	0.00301
61.68	0.002834	0.001669	0.00372904		0.0022184	0.001239	0.00281
61.92	0.002944	0.001849	0.00374904		0.0021284	0.001429	0.00276
62.16	0.002764	0.001759	0.00373904		0.0027884	0.001249	0.00305
62.4	0.002504	0.001499	0.00367904		0.0021284	0.001239	0.00307
62.64	0.003024	0.001739	0.00371904		0.0022684	0.000909	0.00294
62.88	0.002654	0.001959	0.00374904		0.0023884	0.001409	0.00321
63.12	0.003194	0.001449	0.00381904		0.0022184	0.001419	0.00287
63.36	0.002834	0.001609	0.00357904		0.0024884	0.001509	0.00273
63.6	0.002504	0.001809	0.00380904		0.0022584	0.001369	0.0031
63.84	0.002864	0.001649	0.00374904		0.0024984	0.001389	0.00275
64.08	0.003234	0.001909	0.00380904		0.0024684	0.001369	0.00298
64.32	0.002864	0.001519	0.00369904		0.0024284	0.001069	0.003
64.56	0.002584	0.001719	0.00366904		0.0021484	0.001229	0.00315
64.8	0.003284	0.001739	0.00371904		0.0025784	0.001199	0.00315
65.04	0.003184	0.001899	0.00359904		0.0024684	0.001179	0.00296
65.28	0.002794	0.001689	0.00364904		0.0023484	0.001109	0.00315
65.52	0.002694	0.001849	0.00381904		0.0022584	0.000959	0.00286
65.76	0.003244	0.001689	0.00385904		0.0024884	0.001109	0.00306
66	0.003124	0.001899	0.00383904		0.0023284	0.001389	0.00297
66.24	0.003184	0.002039	0.00392904		0.0026984	0.001169	0.00272
66.48	0.002924	0.001759	0.00369904		0.0026884	0.001399	0.00311
66.72	0.003044	0.002059	0.00380904		0.0021384	0.001339	0.00293
66.96	0.002784	0.001819	0.00381904		0.0024484	0.001529	0.00281
67.2	0.002664	0.001849	0.00393904		0.0027684	0.001089	0.0028
67.44	0.003044	0.001649	0.00366904		0.0020284	0.001429	0.00276
67.68	0.002944	0.001729	0.00372904		0.0024084	0.001399	0.00311
67.92	0.002844	0.001559	0.00374904		0.0022484	0.001109	0.00304
68.16	0.002864	0.001809	0.00392904		0.0024584	0.001319	0.00319
68.4	0.003014	0.001799	0.00395904		0.0022684	0.001459	0.00304
68.64	0.002594	0.001689	0.00372904		0.0022684	0.001419	0.00302
68.88	0.003044	0.001849	0.00367904		0.0022884	0.001159	0.00283
69.12	0.003224	0.001959	0.00378904		0.0023284	0.000959	0.00293
69.36	0.002894	0.001809	0.00378904		0.0022484	0.001309	0.00311
69.6	0.002834	0.001809	0.00389904		0.0023984	0.001169	0.00311
69.84	0.002524	0.001919	0.00375904		0.0023984	0.001419	0.00283
70.08	0.002634	0.001979	0.00367904		0.0024084	0.001229	0.00309
70.32	0.002544	0.001799	0.00374904		0.0025884	0.001379	0.00288
70.56	0.002844	0.001859	0.00387904		0.0025984	0.001359	0.00286
70.8	0.002754	0.001879	0.00370904		0.0025184	0.001099	0.00312
71.04	0.003064	0.001969	0.00381904		0.0027084	0.001219	0.003
71.28	0.003084	0.002109	0.00374904		0.0023484	0.001259	0.00288
71.52	0.003214	0.001839	0.00369904		0.0028584	0.001459	0.00305
71.76	0.002994	0.001949	0.00387904		0.0025184	0.001359	0.00306
72	0.002594	0.001899	0.00390904		0.0024584	0.001149	0.00307
72.24	0.002564	0.001899	0.00378904		0.0025184	0.001219	0.00316
72.48	0.003314	0.001799	0.00380904		0.0026184	0.001519	0.00296
72.72	0.002614	0.001779	0.00375904		0.0021984	0.001439	0.00286
72.96	0.003224	0.001799	0.00368904		0.0027184	0.001379	0.00287
73.2	0.003054	0.002019	0.00370904		0.0024184	0.001399	0.00286
73.44	0.002954	0.001699	0.00400904		0.0027384	0.001449	0.00303
73.68	0.002744	0.001609	0.00376904		0.0028284	0.001139	0.00293
73.92	0.003114	0.001879	0.00381904		0.0027284	0.001159	0.00305
74.16	0.003124	0.002049	0.00385904		0.0026284	0.001529	0.00314
74.4	0.002824	0.002399	0.00400904		0.0022184	0.001589	0.00285
74.64	0.002994	0.001829	0.00377904		0.0029984	0.001239	0.00305
74.88	0.003114	0.001809	0.00385904		0.0024084	0.001169	0.0032
75.12	0.002984	0.001699	0.00401904		0.0027984	0.001589	0.0029
75.36	0.002954	0.002049	0.00388904		0.0025784	0.001769	0.00309
75.6	0.002874	0.001949	0.00369904		0.0023584	0.001629	0.00299
75.84	0.003134	0.001749	0.00399904		0.0028384	0.001499	0.00297
76.08	0.002964	0.001989	0.00373904		0.0027084	0.001379	0.00302
76.32	0.003364	0.001849	0.00383904		0.0029384	0.001229	0.00289
76.56	0.002754	0.001999	0.00385904		0.0024084	0.001469	0.00307
76.8	0.003084	0.001919	0.00403904		0.0025784	0.001429	0.00312
77.04	0.003094	0.002099	0.00374904		0.0025484	0.001419	0.00309
77.28	0.003384	0.001829	0.00380904		0.0025984	0.001479	0.003
77.52	0.002864	0.002009	0.00398904		0.0023884	0.001469	0.00315
77.76	0.003144	0.002139	0.00385904		0.0026684	0.001279	0.00313
78	0.002984	0.001639	0.00369904		0.0025784	0.001359	0.00327
78.24	0.003254	0.001739	0.00356904		0.0024784	0.001409	0.003
78.48	0.002864	0.001899	0.00394904		0.0026684	0.001509	0.00301
78.72	0.003084	0.001839	0.00381904		0.0025484	0.001249	0.00326
78.96	0.003214	0.002169	0.00370904		0.0027484	0.001479	0.00294
79.2	0.003024	0.001829	0.00393904		0.0028584	0.001529	0.00295
79.44	0.003044	0.001839	0.00383904		0.0028184	0.001349	0.003
79.68	0.003194	0.002019	0.00385904		0.0027584	0.001339	0.00314
79.92	0.003104	0.001999	0.00381904		0.0028084	0.001689	0.00329
80.16	0.003094	0.001769	0.00374904		0.0027884	0.001419	0.00313
80.4	0.003204	0.002089	0.00378904		0.0028984	0.001309	0.00304
80.64	0.002684	0.001769	0.00360904		0.0028084	0.001159	0.00296
80.88	0.003194	0.001669	0.00398904		0.0026784	0.001279	0.00303
81.12	0.003214	0.002009	0.00369904		0.0025484	0.001529	0.003
81.36	0.003354	0.002219	0.00377904		0.0023884	0.001579	0.00291
81.6	0.003164	0.001859	0.00395904		0.0026884	0.001669	0.00305
81.84	0.003124	0.001949	0.00376904		0.0028384	0.001409	0.00329
82.08	0.003584	0.002099	0.00379904		0.0027184	0.001349	0.00302
82.32	0.003304	0.001939	0.00392904		0.0029484	0.001509	0.00319
82.56	0.003284	0.002019	0.00397904		0.0026984	0.001569	0.00308
82.8	0.003114	0.001899	0.00365904		0.0026384	0.001449	0.00306
83.04	0.003104	0.001889	0.00378904		0.0023484	0.001599	0.00301
83.28	0.003684	0.001749	0.00394904		0.0030784	0.001479	0.00304
83.52	0.003394	0.002189	0.00385904		0.0025384	0.001149	0.0029
83.76	0.003304	0.002059	0.00391904		0.0025084	0.001589	0.00324
84	0.003064	0.001919	0.00370904		0.0026984	0.001719	0.00294
84.24	0.002974	0.001839	0.00392904		0.0022984	0.001359	0.0031
84.48	0.002914	0.001899	0.00390904		0.0031684	0.001369	0.00305
84.72	0.003114	0.002049	0.00370904		0.0028484	0.001419	0.00305
84.96	0.003214	0.002139	0.00403904		0.0028184	0.001709	0.00327
85.2	0.003474	0.002009	0.00378904		0.0028284	0.001319	0.00313
85.44	0.003194	0.002009	0.00409904		0.0024984	0.001599	0.00302
85.68	0.003064	0.002359	0.00378904		0.0024984	0.001529	0.00304
85.92	0.003364	0.002119	0.00396904		0.0028684	0.001279	0.00324
86.16	0.003004	0.002139	0.00403904		0.0026984	0.001439	0.00315
86.4	0.003124	0.001769	0.00377904		0.0022884	0.001609	0.00293
86.64	0.003474	0.001819	0.00393904		0.0026884	0.001789	0.00322
86.88	0.003324	0.001939	0.00370904		0.0027684	0.001829	0.00306
87.12	0.003554	0.002179	0.00398904		0.0030484	0.001399	0.00327
87.36	0.003064	0.001889	0.00404904		0.0029384	0.001599	0.00307
87.6	0.003034	0.002109	0.00410904		0.0028084	0.001569	0.00297
87.84	0.003254	0.002039	0.00386904		0.0027184	0.001349	0.00328
88.08	0.003144	0.001989	0.00394904		0.0029284	0.001559	0.003
88.32	0.003684	0.002119	0.00410904		0.0025784	0.001529	0.003
88.56	0.003604	0.002019	0.00400904		0.0025784	0.001319	0.00307
88.8	0.003144	0.002049	0.00377904		0.0029284	0.001529	0.00335
89.04	0.003174	0.002109	0.00373904		0.0025784	0.001769	0.00318
89.28	0.003044	0.001829	0.00382904		0.0028384	0.001399	0.00311
89.52	0.003454	0.001959	0.00380904		0.0029484	0.001259	0.00296
89.76	0.003194	0.002139	0.00385904		0.0027784	0.001399	0.00289
90	0.003424	0.001909	0.00401904		0.0031184	0.001389	0.00308
90.24	0.003174	0.001989	0.00401904		0.0025484	0.001659	0.00313
90.48	0.003604	0.002239	0.00385904		0.0032184	0.001319	0.00329
90.72	0.003314	0.001929	0.00371904		0.0027184	0.001459	0.00308
90.96	0.002974	0.002079	0.00373904		0.0029384	0.001559	0.00312
91.2	0.003174	0.002259	0.00394904		0.0027884	0.001639	0.00313
91.44	0.003424	0.002229	0.00401904		0.0027884	0.001599	0.00334
91.68	0.003244	0.001719	0.00377904		0.0029184	0.001139	0.00309
91.92	0.003264	0.001819	0.00408904		0.0028684	0.001699	0.0032
92.16	0.003774	0.002169	0.00381904		0.0031584	0.001599	0.00321
92.4	0.003294	0.001849	0.00365904		0.0026784	0.001389	0.00304
92.64	0.003064	0.002139	0.00388904		0.0028484	0.001559	0.00308
92.88	0.003384	0.001759	0.00397904		0.0028284	0.001689	0.00304
93.12	0.003504	0.001909	0.00375904		0.0027384	0.001369	0.00316
93.36	0.003804	0.002089	0.00391904		0.0028084	0.001919	0.00309
93.6	0.003304	0.001939	0.00395904		0.0026684	0.001499	0.00309
93.84	0.003414	0.002249	0.00382904		0.0028584	0.001649	0.00312
94.08	0.003614	0.002199	0.00386904		0.0028884	0.001669	0.00299
94.32	0.003144	0.002089	0.00388904		0.0023084	0.001369	0.00319
94.56	0.003614	0.002209	0.00390904		0.0027384	0.001659	0.00325
94.8	0.003744	0.001939	0.00411904		0.0029684	0.001429	0.00312
95.04	0.003184	0.002269	0.00397904		0.0024384	0.001299	0.00305
95.28	0.003434	0.001989	0.00389904		0.0029184	0.001409	0.00301
95.52	0.003724	0.002399	0.00394904		0.0027884	0.001619	0.00323
95.76	0.003184	0.001899	0.00375904		0.0029784	0.001489	0.00298
96	0.003274	0.002199	0.00387904		0.0033284	0.001479	0.00304
96.24	0.003254	0.002239	0.00396904		0.0029984	0.001569	0.00322
96.48	0.003294	0.002229	0.00409904		0.0030884	0.001589	0.0032
96.72	0.003334	0.002039	0.00374904		0.0031284	0.001619	0.00312
96.96	0.003654	0.001969	0.00390904		0.0030884	0.001409	0.00307
97.2	0.003824	0.002029	0.00386904		0.0027284	0.001939	0.00298
97.44	0.003224	0.001929	0.00396904		0.0028584	0.001689	0.00312
97.68	0.003484	0.001889	0.00411904		0.0031684	0.001579	0.00325
97.92	0.003084	0.002209	0.00381904		0.0029484	0.001409	0.00346
98.16	0.003264	0.002249	0.00388904		0.0030484	0.001379	0.00324
98.4	0.003594	0.002209	0.00394904		0.0031484	0.001819	0.00318
98.64	0.003734	0.001929	0.00421904		0.0032784	0.001569	0.00296
98.88	0.003444	0.002039	0.00412904		0.0028984	0.001349	0.0032
99.12	0.003444	0.002129	0.00388904		0.0029484	0.001469	0.0031
99.36	0.003254	0.002099	0.00394904		0.0030384	0.001529	0.00323
99.6	0.003514	0.002259	0.00371904		0.0027984	0.001519	0.00293
99.84	0.003214	0.001939	0.00385904		0.0029784	0.001569	0.00316
100.08	0.003394	0.002069	0.00400904		0.0029984	0.001329	0.00306
100.32	0.003394	0.002329	0.00372904		0.0033284	0.001379	0.00323
100.56	0.003464	0.002369	0.00382904		0.0028484	0.001409	0.00302
100.8	0.003554	0.002089	0.00380904		0.0026784	0.001469	0.00328
101.04	0.003294	0.001959	0.00403904		0.0025184	0.001469	0.00319
101.28	0.003514	0.001939	0.00408904		0.0028784	0.001709	0.00345
101.52	0.003304	0.002029	0.00379904		0.0028884	0.001519	0.00342
101.76	0.003194	0.001959	0.00398904		0.0028684	0.001639	0.00314
102	0.003374	0.001909	0.00389904		0.0029184	0.001219	0.00303
102.24	0.004204	0.002089	0.00387904		0.0029884	0.001759	0.00299
102.48	0.003754	0.002129	0.00372904		0.0032884	0.001609	0.0031
102.72	0.003304	0.002149	0.00393904		0.0024884	0.001449	0.00316
102.96	0.003884	0.001939	0.00393904		0.0028684	0.001719	0.00296
103.2	0.003484	0.001979	0.00384904		0.0032184	0.001829	0.0033
103.44	0.003264	0.002139	0.00401904		0.0032884	0.001729	0.00297
103.68	0.003624	0.002129	0.00396904		0.0029984	0.001279	0.00304
103.92	0.003374	0.002039	0.00380904		0.0029384	0.001459	0.00331
104.16	0.003394	0.002049	0.00370904		0.0032984	0.001649	0.00314
104.4	0.003894	0.002359	0.00366904		0.0031984	0.001589	0.00331
104.64	0.003324	0.001929	0.00381904		0.0032084	0.001409	0.00299
104.88	0.003434	0.002189	0.00386904		0.0030284	0.001559	0.00336
105.12	0.003544	0.002159	0.00395904		0.0028984	0.001819	0.00313
105.36	0.003954	0.001879	0.00379904		0.0031184	0.001759	0.00306
105.6	0.003624	0.002029	0.00370904		0.0028684	0.001619	0.00313
105.84	0.003364	0.002079	0.00373904		0.0031584	0.001609	0.00296
106.08	0.003454	0.002089	0.00378904		0.0030584	0.001379	0.0033
106.32	0.003324	0.002209	0.00390904		0.0025084	0.001549	0.00305
106.56	0.003164	0.002159	0.00378904		0.0029884	0.001679	0.00342
106.8	0.003414	0.001869	0.00396904		0.0032984	0.001419	0.00304
107.04	0.003524	0.002039	0.00398904		0.0030784	0.001379	0.00341
107.28	0.003734	0.002339	0.00404904		0.0028784	0.001719	0.00308
107.52	0.004154	0.002149	0.00404904		0.0027684	0.001579	0.003
107.76	0.003494	0.001949	0.00392904		0.0029884	0.001449	0.00265
108	0.003834	0.002029	0.00405904		0.0028284	0.001729	0.00292
108.24	0.003634	0.001879	0.00379904		0.0028684	0.001379	0.0031
108.48	0.003324	0.001979	0.00415904		0.0031784	0.001659	0.00304
108.72	0.003314	0.002239	0.00391904		0.0031684	0.001469	0.00319
108.96	0.003354	0.002149	0.00423904		0.0028884	0.001649	0.00323
109.2	0.003814	0.002359	0.00414904		0.0029584	0.001789	0.00312
109.44	0.003364	0.002089	0.00401904		0.0031284	0.001429	0.0031
109.68	0.003404	0.002329	0.00359904		0.0030584	0.001449	0.003
109.92	0.003554	0.001939	0.00367904		0.0030084	0.001559	0.00323
110.16	0.003404	0.002179	0.00392904		0.0032084	0.001489	0.00316
110.4	0.003544	0.002059	0.00397904		0.0025384	0.001459	0.00318
110.64	0.003764	0.002229	0.00390904		0.0029884	0.001469	0.00316
110.88	0.003644	0.002099	0.00394904		0.0029284	0.001509	0.00329
111.12	0.003644	0.002069	0.00381904		0.0031684	0.001579	0.00307
111.36	0.003804	0.002109	0.00369904		0.0033984	0.001669	0.00306
111.6	0.003624	0.002089	0.00389904		0.0031284	0.001579	0.00305
111.84	0.003694	0.001939	0.00388904		0.0030584	0.001819	0.00317
112.08	0.003874	0.001889	0.00380904		0.0031484	0.001699	0.00288
112.32	0.003384	0.002169	0.00394904		0.0030284	0.001299	0.00305
112.56	0.003804	0.002209	0.00413904		0.0028984	0.001729	0.00317
112.8	0.003134	0.002349	0.00385904		0.0028084	0.001669	0.00301
113.04	0.003724	0.002069	0.00403904		0.0031884	0.001519	0.00303
113.28	0.003634	0.002249	0.00390904		0.0032984	0.001529	0.00299
113.52	0.003414	0.002139	0.00368904		0.0027884	0.001709	0.00303
113.76	0.003174	0.002239	0.00388904		0.0031284	0.001649	0.00306
114	0.003704	0.001789	0.00414904		0.0028884	0.001809	0.00324
114.24	0.003434	0.002239	0.00389904		0.0033084	0.001809	0.00315
114.48	0.003434	0.002009	0.00378904		0.0030884	0.001659	0.0031
114.72	0.003874	0.002059	0.00362904		0.0032284	0.001529	0.00321
114.96	0.004004	0.001839	0.00406904		0.0029484	0.001499	0.00319
115.2	0.003314	0.001879	0.00400904		0.0030784	0.001599	0.00279
115.44	0.003324	0.002149	0.00406904		0.0029984	0.001729	0.00301
115.68	0.003514	0.002129	0.00394904		0.0030184	0.001369	0.00319
115.92	0.003524	0.002019	0.00385904		0.0029084	0.001569	0.00285
116.16	0.003364	0.002139	0.00389904		0.0030184	0.001759	0.00319
116.4	0.003204	0.002559	0.00400904		0.0030384	0.001519	0.00307
116.64	0.003634	0.002229	0.00371904		0.0030184	0.001319	0.00298
116.88	0.003204	0.002029	0.00385904		0.0030284	0.001579	0.00289
117.12	0.003604	0.001969	0.00391904		0.0031384	0.001429	0.00307
117.36	0.003774	0.002119	0.00391904		0.0029384	0.001549	0.00335
117.6	0.003404	0.002059	0.00371904		0.0033184	0.001679	0.00307
117.84	0.003904	0.002159	0.00383904		0.0032084	0.001919	0.0034
118.08	0.003484	0.002139	0.00366904		0.0033584	0.001649	0.00296
118.32	0.003614	0.002149	0.00394904		0.0031784	0.001729	0.00313
118.56	0.003434	0.002149	0.00378904		0.0031384	0.001419	0.00301
118.8	0.003444	0.002409	0.00377904		0.0031384	0.001569	0.003
119.04	0.003484	0.002339	0.00400904		0.0026584	0.001369	0.00316
119.28	0.003774	0.002119	0.00383904		0.0034484	0.001739	0.00314
119.52	0.003874	0.002189	0.00391904		0.0035384	0.001539	0.00311
119.76	0.013679	0.0082	0.013478	0.013489	0.00146567	0.0017008	0.00266832
120	0.013733	0.007981	0.013236	0.013518	0.00175914	0.00141223	0.0032496
120.24	0.013613	0.008073	0.013126	0.013083	0.00183149	0.00141055	0.00321061
120.48	0.013955	0.007871	0.012835	0.013425	0.00148123	0.00149388	0.00340256
120.72	0.013602	0.00819	0.013274	0.013385	0.00168171	0.00165652	0.003062
120.96	0.013582	0.008147	0.013321	0.013209	0.00139633	0.00150505	0.0029553
121.2	0.013926	0.008166	0.013259	0.013313	0.00181239	0.00160888	0.0030768
121.44	0.013773	0.007826	0.013094	0.013196	0.00135533	0.00150481	0.00310657
121.68	0.013486	0.008174	0.013404	0.013129	0.00157039	0.00159892	0.00263258
121.92	0.014117	0.008385	0.013112	0.013385	0.00143063	0.00158838	0.00345447
122.16	0.014101	0.007969	0.012973	0.013034	0.00154078	0.0012689	0.00328245
122.4	0.013752	0.008041	0.01307	0.013405	0.00183312	0.00166118	0.00304285
122.64	0.013757	0.007803	0.013319	0.013122	0.00143194	0.00135384	0.00284115
122.88	0.014114	0.008288	0.013291	0.013082	0.00143068	0.00157164	0.00287899
123.12	0.014084	0.008245	0.013353	0.013538	0.00161865	0.00150094	0.00357584
123.36	0.013983	0.007872	0.0133	0.013058	0.00145418	0.00114823	0.00300865
123.6	0.01356	0.007896	0.013112	0.0139	0.0014211	0.00149197	0.00297967
123.84	0.013856	0.007781	0.013107	0.013072	0.00160842	0.00137189	0.00320781
124.08	0.013737	0.008048	0.013165	0.013338	0.001357	0.0012518	0.00317808
124.32	0.01353	0.007912	0.012916	0.013166	0.00148397	0.0013529	0.00335512
124.56	0.013731	0.007849	0.013128	0.013643	0.00185949	0.00145689	0.0029473
124.8	0.013614	0.007953	0.013187	0.013525	0.00154809	0.0015202	0.00290006
125.04	0.013886	0.007992	0.013125	0.013048	0.00158572	0.00150852	0.00309035
125.28	0.013599	0.008031	0.013267	0.013267	0.00148369	0.00133136	0.00313929
125.52	0.013396	0.007847	0.01321	0.013597	0.00166559	0.00146828	0.00343022
125.76	0.013874	0.007739	0.013462	0.013678	0.00165114	0.00143205	0.002887
126	0.014027	0.00763	0.013569	0.013204	0.00117765	0.00136648	0.00337132
126.24	0.013515	0.008028	0.013525	0.013401	0.00152385	0.00125423	0.00292209
126.48	0.014043	0.00795	0.013233	0.013497	0.00146181	0.00136283	0.00317326
126.72	0.014102	0.007923	0.0133	0.013402	0.00162086	0.00154088	0.00267287
126.96	0.013747	0.00784	0.013558	0.013387	0.00171056	0.00126616	0.00330593
127.2	0.01353	0.007786	0.013207	0.012797	0.00139809	0.00133734	0.00294436
127.44	0.01344	0.007947	0.013403	0.0132	0.00130037	0.00122525	0.00330566
127.68	0.013497	0.007706	0.013152	0.013307	0.0015497	0.00138425	0.00302935
127.92	0.014192	0.007878	0.013253	0.013367	0.00185223	0.00132305	0.0031309
128.16	0.013642	0.008028	0.013194	0.01306	0.00131714	0.00148479	0.00278844
128.4	0.013331	0.007784	0.013491	0.013229	0.00166123	0.00156077	0.00317828
128.64	0.013882	0.007697	0.013502	0.013432	0.00171012	0.00136757	0.00317407
128.88	0.013825	0.007884	0.013583	0.013363	0.00163909	0.00140856	0.00287489
129.12	0.013609	0.007954	0.013031	0.013097	0.00128935	0.000936858	0.00307391
129.36	0.013688	0.007908	0.013312	0.013249	0.00154499	0.00119521	0.0031346
129.6	0.013913	0.007843	0.013167	0.012942	0.00131122	0.00140319	0.00303728
129.84	0.013698	0.007907	0.013059	0.013144	0.00119156	0.00104425	0.00328137
130.08	0.013461	0.007984	0.013582	0.013278	0.00131165	0.0014649	0.00290764
130.32	0.013687	0.007531	0.013581	0.013666	0.00111671	0.00153581	0.00304919
130.56	0.013391	0.008089	0.013538	0.013192	0.00127713	0.00124585	0.00291049
130.8	0.013433	0.00786	0.01363	0.013628	0.00176983	0.0013861	0.00317703
131.04	0.013769	0.007705	0.01349	0.01342	0.00135571	0.00157317	0.00288808
131.28	0.013598	0.007429	0.013622	0.013257	0.00130486	0.00116063	0.00303814
131.52	0.013691	0.007758	0.01339	0.013498	0.00128008	0.00132752	0.00311043
131.76	0.013646	0.007913	0.013212	0.013581	0.00131494	0.0014836	0.00310946
132	0.013852	0.007996	0.013256	0.013582	0.00116276	0.00108027	0.00284148
132.24	0.013222	0.008062	0.013533	0.01303	0.00143897	0.00134701	0.00309322
132.48	0.013969	0.007703	0.013111	0.013046	0.00152317	0.00139788	0.00286922
132.72	0.014145	0.007778	0.013444	0.013414	0.00111989	0.00135083	0.00296393
132.96	0.013808	0.0077	0.013422	0.013456	0.0017648	0.000995822	0.00254741
133.2	0.01359	0.00794	0.013306	0.013424	0.00162822	0.00129656	0.00281411
133.44	0.013431	0.007951	0.013375	0.013045	0.00159422	0.00117099	0.00298739
133.68	0.013767	0.007929	0.013344	0.013356	0.00130312	0.00149234	0.00312993
133.92	0.01352	0.007822	0.013164	0.01312	0.00128625	0.00130644	0.00312507
134.16	0.01369	0.007588	0.013572	0.013413	0.00118605	0.00118522	0.00281121
134.4	0.013713	0.007452	0.013433	0.013331	0.00127234	0.00109978	0.00297276
134.64	0.013703	0.007547	0.013451	0.013258	0.00147603	0.00111342	0.00298355
134.88	0.013595	0.007963	0.013599	0.013169	0.00147141	0.00104639	0.00270927
135.12	0.01375	0.00776	0.01347	0.013327	0.00140667	0.000955623	0.00318628
135.36	0.013081	0.007651	0.013451	0.013195	0.00158508	0.00126563	0.00314631
135.6	0.013553	0.007678	0.013406	0.013217	0.00129504	0.00143192	0.002895
135.84	0.01368	0.008048	0.013581	0.013667	0.00137085	0.00120043	0.0027127
136.08	0.014196	0.007506	0.013308	0.013405	0.00128615	0.0012468	0.0031223
136.32	0.013651	0.007747	0.013642	0.013463	0.00112755	0.00100544	0.00305262
136.56	0.013629	0.007873	0.01318	0.013475	0.00121073	0.0010791	0.0030393
136.8	0.013582	0.007816	0.013144	0.013331	0.00177987	0.00115905	0.00284124
137.04	0.013913	0.007802	0.013319	0.013297	0.00160151	0.00120254	0.00312854
137.28	0.013643	0.007507	0.013552	0.013213	0.00180442	0.00112258	0.00298418
137.52	0.013958	0.007494	0.013268	0.012957	0.00162417	0.00131665	0.00333201
137.76	0.01383	0.007847	0.013771	0.013655	0.00118165	0.00144772	0.00269019
138	0.013504	0.00735	0.013533	0.013207	0.0014653	0.00127053	0.00280087
138.24	0.013563	0.007771	0.013544	0.013651	0.00159827	0.00111473	0.00271647
138.48	0.013867	0.00758	0.01349	0.013596	0.00153868	0.00102674	0.00271177
138.72	0.013546	0.007985	0.013556	0.013444	0.00115072	0.000945661	0.00276274
138.96	0.013596	0.00766	0.013762	0.013642	0.0011844	0.00110312	0.0026395
139.2	0.013702	0.008065	0.013561	0.013269	0.000972517	0.00131172	0.00296386
139.44	0.014046	0.007863	0.013148	0.013093	0.00162981	0.001234	0.00326924
139.68	0.013279	0.007617	0.013671	0.012963	0.0011755	0.0012857	0.00309531
139.92	0.013738	0.00757	0.013668	0.013379	0.00133795	0.0011973	0.00281955
140.16	0.013437	0.007739	0.013589	0.01358	0.00146454	0.00117249	0.00293242
140.4	0.013769	0.007791	0.013639	0.013596	0.00113363	0.00112808	0.00312659
140.64	0.013402	0.007339	0.013644	0.013428	0.00141517	0.00142028	0.00284736
140.88	0.013498	0.00781	0.013821	0.013123	0.00145736	0.00136176	0.00290141
141.12	0.013328	0.007831	0.013582	0.013287	0.000898277	0.00113565	0.00299985
141.36	0.013518	0.007636	0.013627	0.013632	0.00141053	0.00116507	0.00282733
141.6	0.013554	0.007676	0.013564	0.013453	0.0012215	0.00113342	0.00296751
141.84	0.013739	0.007455	0.013574	0.013387	0.00124417	0.00132774	0.00271904
142.08	0.013706	0.007622	0.013578	0.013343	0.00127499	0.00102805	0.00295226
142.32	0.013931	0.007615	0.013344	0.013404	0.00152651	0.0010906	0.0029622
142.56	0.013624	0.00757	0.013609	0.013361	0.00127246	0.00119275	0.00280473
142.8	0.013903	0.007672	0.013547	0.01295	0.00129651	0.00106987	0.00285799
143.04	0.013459	0.007727	0.013562	0.013535	0.00127917	0.00109972	0.00286612
143.28	0.013685	0.007616	0.01367	0.013044	0.000960809	0.000720085	0.00276897
143.52	0.013748	0.007781	0.01347	0.01332	0.0011562	0.000674294	0.0027571
143.76	0.013389	0.007341	0.013599	0.012997	0.00111738	0.00126183	0.00292697
144	0.013538	0.007521	0.013573	0.013423	0.00166794	0.000992036	0.00287714
144.24	0.013823	0.007437	0.013476	0.013254	0.00145204	0.0010967	0.00271321
144.48	0.013544	0.007688	0.01372	0.013549	0.00133408	0.00138945	0.00282909
144.72	0.013909	0.00761	0.013948	0.012981	0.00139708	0.00126899	0.00259444
144.96	0.013681	0.007793	0.013747	0.012825	0.00130785	0.000945219	0.00282317
145.2	0.013514	0.00741	0.013686	0.013535	0.00120083	0.000938121	0.0028912
145.44	0.014011	0.007499	0.013482	0.013209	0.00118013	0.000892149	0.00281552
145.68	0.013647	0.007259	0.013689	0.013285	0.00143735	0.0011532	0.00274512
145.92	0.013808	0.007693	0.013848	0.013312	0.00083715	0.000895419	0.00305079
146.16	0.013256	0.007659	0.013649	0.013556	0.000853164	0.00108487	0.00307942
146.4	0.013843	0.007584	0.013585	0.01313	0.00129504	0.00123262	0.00306645
146.64	0.01367	0.007363	0.013671	0.013533	0.00160937	0.000881963	0.00296833
146.88	0.013584	0.007415	0.013675	0.013226	0.00142973	0.00125051	0.00286968
147.12	0.013395	0.007467	0.013731	0.012962	0.0017889	0.00133468	0.00264649
147.36	0.013736	0.007548	0.013655	0.013637	0.00119787	0.00115159	0.00295551
147.6	0.013368	0.007518	0.01363	0.013126	0.00118077	0.00103692	0.00288405
147.84	0.013807	0.007657	0.013666	0.013535	0.00154747	0.000912422	0.00286943
148.08	0.013546	0.007568	0.013724	0.013351	0.00103633	0.00100113	0.00278964
148.32	0.013382	0.007543	0.013823	0.013201	0.00111721	0.000828025	0.00311741
148.56	0.01358	0.007393	0.013516	0.013023	0.00118313	0.0012387	0.00289529
148.8	0.013843	0.007498	0.013864	0.013448	0.00122138	0.00111085	0.00290977
149.04	0.013635	0.007331	0.013873	0.013247	0.00131329	0.000917213	0.00296993
149.28	0.013355	0.007538	0.013584	0.013217	0.00123449	0.00119766	0.00294504
149.52	0.013644	0.007535	0.013672	0.013605	0.000949339	0.00100387	0.00296193
149.76	0.013754	0.007539	0.013844	0.013235	0.00134419	0.000657742	0.00269917
150	0.013468	0.007413	0.013617	0.013462	0.00134283	0.00116753	0.00270061
150.24	0.014495	0.007826	0.014291	0.013448	0.00120778	0.00119568	0.00284396
150.48	0.015361	0.007551	0.014669	0.01351	0.00152552	0.000903648	0.00277384
150.72	0.016348	0.007976	0.015148	0.013688	0.00107436	0.00129536	0.0028155
150.96	0.017127	0.008067	0.015492	0.013893	0.00132005	0.00112121	0.00247539
151.2	0.01726	0.00828	0.016047	0.013631	0.00146543	0.00100629	0.00291689
151.44	0.017871	0.008318	0.016138	0.014237	0.00104657	0.00103497	0.00285507
151.68	0.018631	0.008554	0.016826	0.014358	0.00113225	0.00120389	0.00282051
151.92	0.019293	0.008844	0.017066	0.014109	0.00122509	0.00109682	0.00299071
152.16	0.019548	0.009061	0.017443	0.014387	0.00157202	0.00110815	0.00267373
152.4	0.020137	0.008909	0.017526	0.014607	0.00137309	0.000859685	0.00269536
152.64	0.02031	0.009089	0.017858	0.01435	0.000876659	0.00117106	0.00304308
152.88	0.020647	0.009368	0.017772	0.014327	0.00116111	0.00107077	0.00255355
153.12	0.021374	0.00933	0.018062	0.014529	0.00131658	0.00112499	0.00300478
153.36	0.02167	0.009282	0.018754	0.014843	0.00147417	0.000802389	0.00277492
153.6	0.021572	0.009504	0.018651	0.014799	0.00167519	0.00096799	0.00308034
153.84	0.02254	0.009802	0.019073	0.014841	0.00120616	0.00110809	0.0027709
154.08	0.022544	0.009644	0.019404	0.01504	0.00129173	0.00114621	0.00321245
154.32	0.022699	0.009922	0.019139	0.015355	0.00155032	0.00105702	0.0026608
154.56	0.023283	0.010055	0.019507	0.015106	0.00131739	0.00105988	0.00305435
154.8	0.02369	0.00997	0.019504	0.015014	0.00150364	0.000575147	0.00293333
155.04	0.02348	0.009953	0.019411	0.01536	0.00163143	0.00077528	0.00323713
155.28	0.023606	0.010159	0.019843	0.015586	0.00144507	0.000826765	0.00295861
155.52	0.023589	0.010419	0.020312	0.015468	0.0012737	0.00120834	0.00280583
155.76	0.024613	0.010074	0.01988	0.015249	0.00133282	0.000843214	0.00278573
156	0.024236	0.010318	0.020323	0.015171	0.00131264	0.000992553	0.00297225
156.24	0.024852	0.010714	0.019911	0.015362	0.00129031	0.000898943	0.00277306
156.48	0.024172	0.010601	0.020561	0.015023	0.00155972	0.00088591	0.00318589
156.72	0.024845	0.01033	0.020746	0.015304	0.00140054	0.00106178	0.00311989
156.96	0.025195	0.010775	0.020797	0.015177	0.000918316	0.000966955	0.0030908
157.2	0.024894	0.010858	0.020987	0.015796	0.00154368	0.00114619	0.00300195
157.44	0.025412	0.010635	0.021041	0.015084	0.00144389	0.00121806	0.00273088
157.68	0.025193	0.010892	0.020877	0.015636	0.00127316	0.00098952	0.00292263
157.92	0.025493	0.011043	0.021229	0.015643	0.0012534	0.00109843	0.00296419
158.16	0.025547	0.010907	0.021502	0.015607	0.00112311	0.00102566	0.00311013
158.4	0.025736	0.011025	0.021336	0.015671	0.000878925	0.00120252	0.0028086
158.64	0.025469	0.010957	0.02129	0.015461	0.000890303	0.000601733	0.00302584
158.88	0.025536	0.010977	0.021528	0.015784	0.00141042	0.000815774	0.00290874
159.12	0.025943	0.010926	0.021629	0.01589	0.000906134	0.00105886	0.00298695
159.36	0.026238	0.01119	0.021242	0.015962	0.0010607	0.00112769	0.00315614
159.6	0.026851	0.011158	0.021367	0.01531	0.00100662	0.00135839	0.00327964
159.84	0.026438	0.010976	0.021508	0.015669	0.00126924	0.00119284	0.00306568
160.08	0.026761	0.011024	0.021694	0.015526	0.00127691	0.000968184	0.00295892
160.32	0.026752	0.011283	0.021586	0.016225	0.00145554	0.000915326	0.00299057
160.56	0.026507	0.011044	0.021835	0.015801	0.00170646	0.000969538	0.00286406
160.8	0.027092	0.011232	0.022143	0.01629	0.00118665	0.00112724	0.00293416
161.04	0.026738	0.011549	0.022236	0.015787	0.00144746	0.0011205	0.00289765
161.28	0.026824	0.011514	0.022154	0.016142	0.0012382	0.00074528	0.00324094
161.52	0.027004	0.011396	0.022396	0.015846	0.00128758	0.00125502	0.00295243
161.76	0.02776	0.011348	0.0218	0.015932	0.00133274	0.00138501	0.00286754
162	0.027072	0.011277	0.02225	0.016121	0.00141013	0.00111761	0.00291239
162.24	0.027162	0.011372	0.022269	0.016034	0.00108704	0.00114613	0.00283324
162.48	0.027296	0.011243	0.022328	0.015885	0.00108649	0.00128343	0.00289692
162.72	0.027076	0.011399	0.022501	0.016178	0.00150685	0.00138313	0.00259689
162.96	0.027226	0.011349	0.02242	0.015946	0.00113583	0.00138497	0.00293834
163.2	0.027275	0.01135	0.022324	0.015653	0.00133612	0.00104927	0.00301246
163.44	0.027238	0.011664	0.022493	0.016236	0.00146357	0.00115446	0.00308929
163.68	0.02745	0.011559	0.022502	0.016165	0.00128804	0.00133686	0.00274198
163.92	0.027825	0.011503	0.02265	0.016315	0.00119948	0.00116423	0.0028873
164.16	0.027555	0.01147	0.022495	0.015875	0.00129696	0.000962182	0.00301383
164.4	0.027754	0.011598	0.022694	0.015672	0.00108288	0.00131947	0.00262434
164.64	0.027285	0.011909	0.022781	0.016151	0.00108632	0.00110429	0.00275124
164.88	0.027814	0.011614	0.022573	0.01645	0.00124183	0.000984975	0.00297161
165.12	0.028137	0.011307	0.022698	0.016743	0.00107009	0.00108243	0.00332905
165.36	0.028474	0.011553	0.022779	0.016086	0.00117735	0.00120147	0.00287392
165.6	0.028067	0.011782	0.02269	0.01579	0.00158903	0.00147345	0.00278509
165.84	0.027806	0.011525	0.0228	0.015702	0.00131159	0.00139362	0.00265019
166.08	0.027918	0.011783	0.022542	0.015908	0.0012879	0.00117939	0.00319416
166.32	0.027906	0.011892	0.022848	0.016306	0.00102934	0.00121065	0.00330227
166.56	0.027829	0.011515	0.022787	0.015862	0.00145931	0.000983483	0.00305125
166.8	0.028257	0.011915	0.022647	0.016285	0.000963769	0.00107072	0.00310992
167.04	0.028224	0.011566	0.022751	0.015813	0.00129775	0.00106423	0.00305562
167.28	0.028172	0.011641	0.022803	0.015691	0.00146103	0.00124756	0.00300659
167.52	0.028223	0.011656	0.022844	0.016047	0.0012124	0.00112746	0.00316363
167.76	0.028221	0.011657	0.022517	0.016047	0.00132706	0.00127486	0.00306091
168	0.027858	0.011601	0.022954	0.016059	0.00105482	0.000959729	0.00327543
168.24	0.028563	0.011593	0.022864	0.016085	0.00122233	0.00134969	0.00283354
168.48	0.028179	0.011894	0.022968	0.01588	0.00122746	0.00123872	0.00299977
168.72	0.028508	0.011955	0.023009	0.016208	0.00119651	0.00109804	0.00289595
168.96	0.028128	0.011798	0.022587	0.016275	0.000802423	0.00125423	0.00300685
169.2	0.028355	0.011567	0.022795	0.01576	0.000912096	0.00128558	0.00317232
169.44	0.028414	0.011699	0.022936	0.016083	0.00125202	0.00119615	0.002939
169.68	0.027858	0.011724	0.023087	0.01601	0.000962202	0.00125593	0.00331766
169.92	0.028244	0.011865	0.022981	0.016191	0.00119306	0.00128998	0.00281847
170.16	0.028404	0.012017	0.023235	0.016363	0.00108971	0.00136102	0.00270564
170.4	0.02861	0.011895	0.022913	0.016284	0.00105402	0.00109282	0.00296716
170.64	0.028421	0.012003	0.022813	0.016203	0.00141844	0.00110286	0.00305572
170.88	0.028156	0.011703	0.022981	0.016473	0.00131442	0.00115299	0.00307202
171.12	0.028815	0.011861	0.023219	0.015892	0.0011683	0.00126362	0.00268547
171.36	0.028238	0.012019	0.023053	0.016163	0.00123114	0.0014002	0.00312102
171.6	0.028578	0.011593	0.023126	0.015885	0.000965799	0.0013499	0.00321457
171.84	0.029069	0.011772	0.022975	0.016534	0.00140899	0.00138895	0.00292723
172.08	0.028984	0.011866	0.0233	0.016093	0.000704474	0.00139809	0.00275395
172.32	0.028993	0.011857	0.023168	0.016882	0.00096474	0.00126134	0.00295734
172.56	0.028401	0.0115	0.023174	0.015928	0.00105765	0.00129803	0.00261453
172.8	0.028263	0.011796	0.023174	0.016529	0.00132349	0.00138813	0.00295072
173.04	0.028894	0.011939	0.023087	0.016041	0.00115841	0.00103505	0.00283701
173.28	0.028743	0.011479	0.023228	0.015748	0.00135243	0.00147102	0.00308589
173.52	0.02815	0.012141	0.023132	0.016053	0.00107817	0.00149309	0.00276119
173.76	0.028622	0.012096	0.023501	0.015797	0.000750256	0.00125721	0.00278527
174	0.02884	0.012024	0.023037	0.015829	0.000895704	0.00124369	0.00270741
174.24	0.028667	0.011944	0.023493	0.016083	0.000878144	0.00106369	0.00283348
174.48	0.028417	0.011936	0.023335	0.016047	0.00119392	0.00157261	0.00286434
174.72	0.028666	0.012001	0.022978	0.016016	0.00129155	0.00134454	0.00304478
174.96	0.028736	0.012017	0.023094	0.015495	0.000723777	0.00105698	0.00294307
175.2	0.028718	0.011828	0.023209	0.016259	0.000856657	0.00115053	0.00286539
175.44	0.028943	0.011976	0.023052	0.01587	0.000816354	0.00105911	0.00317475
175.68	0.028766	0.012198	0.023391	0.015998	0.00123917	0.00126198	0.00271818
175.92	0.029182	0.011674	0.023474	0.015868	0.000662826	0.00116642	0.00305501
176.16	0.028858	0.012008	0.023164	0.016016	0.00125249	0.00106767	0.00271934
176.4	0.028475	0.011919	0.023225	0.015606	0.000815806	0.00127272	0.00316646
176.64	0.028876	0.011802	0.023393	0.016439	0.00106769	0.0012046	0.00277678
176.88	0.028767	0.012085	0.023431	0.015895	0.00137188	0.00117041	0.00310305
177.12	0.028511	0.012114	0.023065	0.016274	0.000978095	0.00122893	0.00274486
177.36	0.029052	0.01204	0.02295	0.016552	0.000989952	0.00122835	0.00303871
177.6	0.028711	0.011711	0.023357	0.016188	0.000845486	0.00113339	0.00301888
177.84	0.029348	0.01166	0.023133	0.015997	0.00104628	0.00128862	0.00286686
178.08	0.028416	0.012209	0.023345	0.016384	0.00117237	0.00121726	0.00328631
178.32	0.028821	0.011643	0.023096	0.015971	0.0011459	0.0014337	0.0029877
178.56	0.028891	0.011956	0.022835	0.016283	0.00127615	0.00152057	0.00298069
178.8	0.028672	0.011967	0.023005	0.015675	0.00114643	0.00141547	0.00305497
179.04	0.029392	0.012071	0.023275	0.015752	0.000985527	0.00158358	0.00327642
179.28	0.029088	0.011665	0.0232	0.016147	0.00130861	0.00140222	0.00303404
179.52	0.02903	0.011909	0.023071	0.016161	0.000942017	0.00141863	0.00283082
179.76	0.029386	0.011817	0.023222	0.016196	0.000957902	0.00120605	0.00258386
180	0.028965	0.011903	0.022849	0.015853	0.00109449	0.00139925	0.00297345
180.24	0.028634	0.011445	0.023188	0.015565	0.000851584	0.00155995	0.00315914
180.48	0.029135	0.012041	0.023487	0.015866	0.00095536	0.00115503	0.00291027
180.72	0.029101	0.011921	0.023272	0.015958	0.00084205	0.00154889	0.00287697
180.96	0.028759	0.011978	0.023174	0.015935	0.00105435	0.00138764	0.00276817
181.2	0.029207	0.011685	0.023315	0.015946	0.00104321	0.00122937	0.00318429
181.44	0.029228	0.011462	0.023243	0.015921	0.00124101	0.00140781	0.00269726
181.68	0.029397	0.011662	0.023433	0.015893	0.000980825	0.00160709	0.00285359
181.92	0.02919	0.011822	0.023021	0.016101	0.00100344	0.00107867	0.00293347
182.16	0.029117	0.01185	0.023674	0.015838	0.000931311	0.00127243	0.00293528
182.4	0.029669	0.011939	0.023279	0.016013	0.000909252	0.00134554	0.00284531
182.64	0.029205	0.011565	0.023286	0.01595	0.00118449	0.00128483	0.00262346
182.88	0.029234	0.012152	0.023565	0.015958	0.00124876	0.00139993	0.00289189
183.12	0.029309	0.011978	0.023452	0.01615	0.00120564	0.00111158	0.00285055
183.36	0.029097	0.012019	0.022879	0.015999	0.000733915	0.00142604	0.00291945
183.6	0.028961	0.011614	0.023597	0.016204	0.00101177	0.00145492	0.00307445
183.84	0.029196	0.011869	0.023555	0.016269	0.0013693	0.00120946	0.00304105
184.08	0.029397	0.01175	0.023305	0.01531	0.000971986	0.00131633	0.00295443
184.32	0.028729	0.011739	0.023371	0.015937	0.00115002	0.00130719	0.00294848
184.56	0.029242	0.011787	0.023358	0.01589	0.000929956	0.00144527	0.00277271
184.8	0.029106	0.011823	0.023426	0.015995	0.0009946	0.00129068	0.0028255
185.04	0.028994	0.011571	0.023564	0.015911	0.00127849	0.00146483	0.00272481
185.28	0.029441	0.011849	0.023318	0.016177	0.00112147	0.00154287	0.00275046
185.52	0.029351	0.011831	0.023266	0.016078	0.000959579	0.00134909	0.00266986
185.76	0.029575	0.01174	0.023176	0.016123	0.00125212	0.00109239	0.0030768
186	0.029259	0.011502	0.023078	0.015352	0.00115638	0.00152086	0.00321788
186.24	0.029168	0.011904	0.023291	0.015804	0.00092613	0.00147984	0.00309797
186.48	0.029421	0.011783	0.023432	0.015685	0.000637175	0.00142035	0.00259994
186.72	0.02958	0.011762	0.023253	0.015907	0.000857737	0.00136612	0.00287667
186.96	0.029082	0.011649	0.023672	0.015533	0.000642061	0.00134983	0.00312915
187.2	0.029314	0.011937	0.02328	0.015902	0.00133496	0.00166835	0.00264258
187.44	0.029481	0.011569	0.023393	0.015553	0.00104727	0.000996156	0.002992
187.68	0.029051	0.011459	0.02349	0.016399	0.000832682	0.00120981	0.0029517
187.92	0.028691	0.011576	0.023602	0.015898	0.000533177	0.0015627	0.00278392
188.16	0.029665	0.011952	0.023093	0.01552	0.000950711	0.00125327	0.00286586
188.4	0.028812	0.011963	0.023448	0.015632	0.00124917	0.00125948	0.00281522
188.64	0.029098	0.011789	0.023101	0.015764	0.000957794	0.00140352	0.00267353
188.88	0.029021	0.01169	0.023305	0.015954	0.00114527	0.00135436	0.00275639
189.12	0.029489	0.011824	0.023405	0.015436	0.000943445	0.00111011	0.00294705
189.36	0.029057	0.011847	0.023057	0.015564	0.00113692	0.00113779	0.00266218
189.6	0.029259	0.011554	0.02332	0.016106	0.00126793	0.00140013	0.00289029
189.84	0.029414	0.01164	0.023498	0.015772	0.00124739	0.00142701	0.00248705
190.08	0.029315	0.011429	0.02341	0.015695	0.000785071	0.00140433	0.00285483
190.32	0.02886	0.011616	0.023218	0.015463	0.00100504	0.00155876	0.0031079
190.56	0.028977	0.011676	0.023623	0.015849	0.000952437	0.00121305	0.00278919
190.8	0.029351	0.011365	0.022976	0.015888	0.00132577	0.00142011	0.00316804
191.04	0.029373	0.011681	0.023416	0.016183	0.000776012	0.00134678	0.00277898
191.28	0.029062	0.011393	0.023403	0.015542	0.000880599	0.00130588	0.00296495
191.52	0.029419	0.011736	0.023404	0.015384	0.00121691	0.00130112	0.00279602
191.76	0.029337	0.011179	0.023261	0.016137	0.000743105	0.00136467	0.00297984
192	0.029307	0.011767	0.023289	0.015667	0.000447453	0.00133725	0.00286811
192.24	0.029378	0.01164	0.023232	0.016094	0.000969237	0.00142753	0.00272199
192.48	0.028842	0.011605	0.023345	0.015819	0.000838476	0.00128359	0.00282323
192.72	0.029313	0.011598	0.023549	0.015697	0.00093629	0.00128758	0.00278685
192.96	0.029597	0.011695	0.023255	0.015715	0.000467734	0.00128226	0.00283204
193.2	0.02933	0.011616	0.02371	0.015748	0.000868583	0.00133087	0.0027227
193.44	0.028646	0.0117	0.023589	0.015857	0.0009905	0.0011096	0.00260445
193.68	0.029137	0.011363	0.023616	0.01576	0.00125284	0.00117181	0.00258929
193.92	0.029851	0.011627	0.023222	0.015835	0.00114926	0.00133887	0.00283734
194.16	0.029621	0.01172	0.023443	0.015596	0.000786579	0.00141957	0.00271411
194.4	0.029082	0.01165	0.023131	0.015987	0.000934499	0.00131834	0.00267048
194.64	0.029351	0.011294	0.023275	0.015985	0.000678519	0.00140951	0.00297198
194.88	0.029504	0.011615	0.023205	0.016146	0.000937296	0.00119426	0.00252592
195.12	0.028875	0.011368	0.023167	0.015484	0.000706688	0.00138913	0.00284242
195.36	0.029199	0.011351	0.023117	0.015627	0.000940771	0.00149105	0.00262782
195.6	0.029171	0.011381	0.023377	0.015884	0.00090296	0.00134209	0.00307187
195.84	0.029438	0.01164	0.023112	0.015653	0.00101238	0.00115304	0.00282663
196.08	0.029379	0.01166	0.023088	0.015917	0.000885744	0.00138384	0.00288907
196.32	0.029192	0.011259	0.0229	0.015833	0.000856148	0.00109967	0.00301737
196.56	0.029032	0.011408	0.02326	0.015584	0.00100482	0.00142038	0.00282294
196.8	0.028988	0.011498	0.023302	0.015655	0.00113761	0.00112513	0.00272442
197.04	0.029321	0.011628	0.02332	0.015933	0.000894724	0.0015947	0.00282581
197.28	0.029323	0.011343	0.023182	0.015259	0.000873513	0.00147202	0.00235306
197.52	0.029484	0.01129	0.022948	0.015775	0.000609966	0.00128124	0.00297442
197.76	0.029261	0.011648	0.023359	0.015814	0.000891471	0.00146571	0.00289804
198	0.028871	0.011467	0.023152	0.015745	0.00080568	0.00111692	0.00260822
198.24	0.029155	0.011658	0.023338	0.015655	0.000715555	0.00156393	0.00286139
198.48	0.029189	0.011361	0.023077	0.015633	0.00123606	0.00150881	0.00257971
198.72	0.029566	0.011331	0.023193	0.015972	0.00100249	0.00154706	0.00297098
198.96	0.029363	0.011505	0.02302	0.015645	0.000730157	0.00114294	0.00272549
199.2	0.028677	0.011401	0.023115	0.015377	0.000730952	0.0010616	0.00261906
199.44	0.029249	0.011553	0.023199	0.014955	0.000755371	0.00112345	0.00305107
199.68	0.029473	0.011385	0.022875	0.015803	0.000465806	0.00156049	0.00289896
199.92	0.029832	0.011456	0.023119	0.015219	0.000623099	0.000949854	0.00271418
200.16	0.02926	0.011283	0.023171	0.015665	0.000846732	0.000906448	0.00286256
200.4	0.02882	0.01127	0.023503	0.015537	0.000845253	0.00129283	0.00294427
200.64	0.029044	0.011243	0.023061	0.015349	0.00085154	0.0014655	0.00266443
200.88	0.029028	0.011562	0.023124	0.015694	0.00109849	0.00107733	0.00276606
201.12	0.028893	0.011357	0.022935	0.015247	0.000737984	0.00123717	0.00261339
201.36	0.028953	0.011318	0.022976	0.015359	0.00087616	0.00123888	0.00254746
201.6	0.029306	0.011481	0.023235	0.015531	0.000571091	0.00120263	0.00303004
201.84	0.028377	0.010987	0.022998	0.015649	0.00089308	0.00128548	0.00266656
202.08	0.029153	0.011317	0.023189	0.015476	0.0009445	0.00131823	0.00273659
202.32	0.029186	0.011467	0.02302	0.015621	0.000683261	0.00133471	0.00291151
202.56	0.029204	0.011456	0.022887	0.015521	0.000760832	0.00116435	0.00266192
202.8	0.029236	0.011455	0.022824	0.015335	0.0011268	0.00122714	0.0028811
203.04	0.029663	0.011352	0.023221	0.015257	0.000710551	0.00118268	0.00288098
203.28	0.02899	0.011449	0.022939	0.015596	0.000824625	0.00127166	0.00252388
203.52	0.029329	0.011311	0.023344	0.015529	0.000418934	0.0017281	0.00267328
203.76	0.028775	0.011328	0.023515	0.01554	0.000778359	0.00146106	0.0028518
204	0.029021	0.011024	0.02296	0.015307	0.000702309	0.00142734	0.00277236
204.24	0.029582	0.011311	0.022881	0.015205	0.00103233	0.00121713	0.00269389
204.48	0.02916	0.011298	0.023241	0.015679	0.000382077	0.00128535	0.00275547
204.72	0.029474	0.01114	0.022836	0.01566	0.000978633	0.00120127	0.00272919
204.96	0.028855	0.011133	0.022972	0.015607	0.000812204	0.00125105	0.00287496
205.2	0.029315	0.011521	0.023086	0.01535	0.000745038	0.0013904	0.00317943
205.44	0.02913	0.011424	0.022725	0.015312	0.000651096	0.00135762	0.00260111
205.68	0.029202	0.011029	0.023275	0.015538	0.000654938	0.00159617	0.00282359
205.92	0.029679	0.011442	0.022707	0.015378	0.000873391	0.0011902	0.00266987
206.16	0.029062	0.01137	0.02338	0.015072	0.000749874	0.00116463	0.00274126
206.4	0.029088	0.011342	0.022971	0.015338	0.000471735	0.00110159	0.00310848
206.64	0.029506	0.011188	0.023272	0.015281	0.000584189	0.000947759	0.00263075
206.88	0.029049	0.011584	0.022968	0.015437	0.00092601	0.00103224	0.00285831
207.12	0.029336	0.01116	0.022931	0.015429	0.000919077	0.00133599	0.0024951
207.36	0.02887	0.011082	0.023116	0.01555	0.000602753	0.00128134	0.00253899
207.6	0.028951	0.011528	0.023159	0.015344	0.000467459	0.00109551	0.00262344
207.84	0.029274	0.011258	0.022969	0.015417	0.000519552	0.00136466	0.00286896
208.08	0.029324	0.011149	0.022723	0.015418	2.9887e-05	0.00137101	0.00254417
208.32	0.028824	0.011105	0.022991	0.015467	0.000411524	0.00114395	0.00260453
208.56	0.028685	0.011326	0.023281	0.015545	0.000547776	0.00121928	0.00285621
208.8	0.029503	0.01148	0.023145	0.015075	0.000473973	0.00120709	0.00267176
209.04	0.029178	0.011202	0.022937	0.01546	0.000715044	0.000844658	0.00269797
209.28	0.029401	0.011266	0.02272	0.015394	0.000487422	0.00136004	0.00259627
209.52	0.029058	0.011133	0.02276	0.01531	0.000583952	0.00114699	0.00294922
209.76	0.028956	0.011297	0.022877	0.015648	0.000447262	0.00134654	0.0030151
210	0.028785	0.011254	0.02287	0.015212	0.000676259	0.00114011	0.00276196
210.24	0.029036	0.011162	0.022562	0.015442	0.00019199	0.00124652	0.0030806
210.48	0.029026	0.010879	0.023112	0.015386	0.000528628	0.000839421	0.00274319
210.72	0.028714	0.011145	0.02298	0.015564	0.000674295	0.00125003	0.00279018
210.96	0.029333	0.011074	0.023082	0.015634	0.000754267	0.00113681	0.00254547
211.2	0.029207	0.011206	0.023135	0.015296	0.000407479	0.00114401	0.00271297
211.44	0.029012	0.011161	0.022709	0.015073	0.00039303	0.00103746	0.0028589
211.68	0.029317	0.011086	0.023053	0.015343	0.000797403	0.00115341	0.00248776
211.92	0.029083	0.011286	0.02311	0.015326	0.00031327	0.0012463	0.00255463
212.16	0.029237	0.011125	0.022832	0.015072	0.000586074	0.00124742	0.00259163
212.4	0.029461	0.011168	0.022964	0.01538	0.000601399	0.00116653	0.0023517
212.64	0.029075	0.011247	0.022891	0.015226	0.000610326	0.000922279	0.00291221
212.88	0.028892	0.011105	0.022954	0.015485	0.000209835	0.000899802	0.0027144
213.12	0.028882	0.011228	0.022984	0.014899	0.000629356	0.000974989	0.00285238
213.36	0.029113	0.010718	0.022875	0.015479	0.000768923	0.00104837	0.00237298
213.6	0.028945	0.010742	0.022621	0.01511	0.000463362	0.00079588	0.00266107
213.84	0.028824	0.011065	0.023193	0.015099	0.000541302	0.000849578	0.00263971
214.08	0.02854	0.010897	0.022847	0.015492	0.000715141	0.000958203	0.00256448
214.32	0.029496	0.011179	0.022796	0.015461	0.000839456	0.000869191	0.00261102
214.56	0.028922	0.011264	0.022877	0.015234	0.00119973	0.00085601	0.00262821
214.8	0.028945	0.01113	0.022786	0.015308	0.000555739	0.00113863	0.00283677
215.04	0.02864	0.010851	0.022869	0.015166	0.000464913	0.00108231	0.00255866
215.28	0.028824	0.011105	0.022846	0.015314	0.000454273	0.000999667	0.00282667
215.52	0.028962	0.010729	0.022837	0.015496	0.000678445	0.00128405	0.00263266
215.76	0.029504	0.011149	0.022792	0.015535	0.000588954	0.00126052	0.00247414
216	0.028774	0.011113	0.022858	0.015289	0.000400033	0.00112079	0.00271351
216.24	0.029313	0.011293	0.023059	0.015444	0.000480554	0.00092628	0.00245111
216.48	0.028856	0.011068	0.022758	0.014997	0.000497472	0.00106513	0.00288541
216.72	0.028828	0.011128	0.022994	0.015204	0.000468023	0.00106892	0.00234598
216.96	0.028566	0.010772	0.022652	0.015248	0.000793294	0.00102175	0.00264638
217.2	0.028627	0.011202	0.022878	0.015352	0.000470989	0.00111102	0.00261836
217.44	0.028832	0.010943	0.022519	0.015418	0.000673627	0.000862911	0.00240461
217.68	0.028709	0.010884	0.022913	0.014785	0.000604121	0.00122227	0.0026662
217.92	0.02795	0.011088	0.022603	0.015192	0.000332473	0.000936137	0.00212238
218.16	0.028948	0.010885	0.022725	0.01555	0.000863427	0.00120283	0.00281028
218.4	0.028394	0.011283	0.02268	0.015166	0.000431749	0.0011087	0.00271282
218.64	0.028834	0.011006	0.022586	0.015148	0.000476352	0.0012062	0.00269058
218.88	0.029045	0.01087	0.022691	0.01529	0.000565211	0.00109086	0.00243026
219.12	0.028416	0.011117	0.022793	0.015327	0.000439525	0.000798912	0.00298049
219.36	0.028791	0.010631	0.022721	0.015071	0.000759661	0.0008206	0.00257378
219.6	0.028831	0.010963	0.022594	0.014911	0.00085587	0.00105176	0.00239279
219.84	0.029041	0.010911	0.022587	0.015555	0.000530898	0.00118761	0.00248416
220.08	0.028522	0.010891	0.022818	0.014724	0.000369953	0.00111634	0.00276604
220.32	0.028749	0.01094	0.023022	0.015149	0.000879771	0.00117195	0.00266679
220.56	0.029159	0.011095	0.022715	0.014988	0.000768723	0.00114586	0.00236638
220.8	0.028864	0.010741	0.02269	0.014913	0.00038681	0.00104064	0.00255057
221.04	0.028558	0.010797	0.022618	0.015154	0.000237898	0.000922316	0.00247024
221.28	0.028982	0.010791	0.022674	0.015111	0.00057004	0.000743222	0.00258219
221.52	0.028465	0.010877	0.022535	0.015204	0.000448827	0.000859424	0.00263247
221.76	0.028619	0.01098	0.022749	0.014693	0.000450522	0.00105611	0.0024858
222	0.028444	0.010789	0.022367	0.015181	0.000423094	0.00111191	0.00241707
222.24	0.029158	0.010925	0.022618	0.014866	0.000568287	0.00111815	0.00255642
222.48	0.028562	0.010944	0.022749	0.014979	7.00949e-05	0.00119705	0.0024076
222.72	0.028831	0.011034	0.022727	0.014914	0.00045575	0.000763138	0.00241179
222.96	0.028285	0.010469	0.022673	0.014563	0.000408347	0.000757422	0.00255067
223.2	0.029045	0.010681	0.022562	0.014811	0.000561699	0.00114581	0.00244198
223.44	0.028307	0.010573	0.022296	0.015073	0.000404087	0.00092346	0.00264497
223.68	0.028341	0.010815	0.022923	0.014823	0.000762853	0.000989931	0.00213192
223.92	0.028262	0.010694	0.022571	0.014628	0.000429885	0.000942718	0.00278708
224.16	0.028661	0.010899	0.022839	0.0151	0.000404954	0.00111924	0.00237354
224.4	0.028631	0.010949	0.022453	0.015072	0.000436046	0.00131888	0.00248223
224.64	0.028601	0.01096	0.022903	0.015319	0.000626476	0.00121017	0.00271419
224.88	0.028501	0.010741	0.022544	0.015081	0.000470574	0.000882192	0.00260308
225.12	0.028197	0.010837	0.022736	0.014994	0.000570626	0.000975006	0.0028288
225.36	0.02806	0.010373	0.022624	0.015171	0.000582445	0.00131414	0.0025753
225.6	0.028902	0.010849	0.022551	0.015153	0.000456542	0.000978048	0.00226181
225.84	0.028854	0.010543	0.022407	0.015397	0.000653863	0.000660027	0.00255046
226.08	0.028596	0.010802	0.022663	0.014682	0.000191815	0.000991387	0.00237308
226.32	0.028855	0.010617	0.022259	0.014896	0.000193243	0.00112084	0.00220293
226.56	0.028761	0.01066	0.022587	0.014996	0.00057345	0.000935358	0.00227767
226.8	0.028427	0.010702	0.02265	0.01485	0.000407501	0.000621259	0.00259322
227.04	0.028878	0.010548	0.022477	0.015433	0.00041028	0.00080488	0.0023669
227.28	0.02845	0.01057	0.022748	0.015238	0.000209233	0.00124365	0.00260752
227.52	0.028638	0.011005	0.022685	0.015086	0.000717014	0.00094432	0.00227446
227.76	0.028563	0.010777	0.022678	0.014518	0.000381677	0.00107517	0.00234446
228	0.028262	0.01089	0.022776	0.015249	0.000380922	0.00087337	0.00246521
228.24	0.028398	0.010746	0.02245	0.014737	0.000438277	0.000842163	0.00256772
228.48	0.028316	0.010521	0.022856	0.014876	0.000410878	0.000972688	0.00236768
228.72	0.028219	0.01074	0.022511	0.014437	0.000420096	0.000694603	0.00251724
228.96	0.02869	0.010503	0.022453	0.014775	0.000548623	0.00099303	0.00234461
229.2	0.027909	0.010664	0.022915	0.01503	0.00052804	0.00106951	0.00250105
229.44	0.028371	0.010484	0.02251	0.015019	0.000337485	0.000712524	0.00239366
229.68	0.028723	0.010505	0.022518	0.014661	0.000352679	0.000738917	0.0020507
229.92	0.028694	0.010725	0.022634	0.014681	0.000357715	0.000975932	0.00249176
230.16	0.028052	0.010165	0.022507	0.015272	0.000585754	0.000934128	0.00247474
230.4	0.028259	0.010527	0.022557	0.014525	0.000468321	0.00109035	0.00255228
230.64	0.028328	0.010462	0.022465	0.015053	0.000526581	0.000610761	0.00236337
230.88	0.02869	0.010542	0.022388	0.014396	0.000337485	0.00104213	0.00251136
231.12	0.028313	0.010704	0.022528	0.015018	0.000143608	0.00102363	0.0024554
231.36	0.028358	0.010334	0.022509	0.014928	0.000656903	0.000879671	0.00224571
231.6	0.028986	0.010603	0.022443	0.014969	-9.64989e-05	0.000747137	0.0023925
231.84	0.027907	0.010555	0.02251	0.014812	0.000217988	0.000940528	0.00223246
232.08	0.028016	0.010428	0.022242	0.014668	0.000442777	0.00100623	0.00255479
232.32	0.028254	0.010308	0.021993	0.01461	0.000546529	0.000728635	0.00248281
232.56	0.02818	0.010467	0.022303	0.014801	0.000382298	0.000792615	0.00245113
232.8	0.0282	0.010481	0.022355	0.014734	0.000262932	0.000757161	0.0024103
233.04	0.028423	0.010552	0.022316	0.015063	0.000572318	0.00100211	0.0026245
233.28	0.028155	0.010221	0.022284	0.014571	0.000409702	0.00103582	0.00253773
233.52	0.028341	0.01014	0.02239	0.014592	0.000243701	0.000660688	0.0026096
233.76	0.028262	0.010263	0.022387	0.015045	0.000537046	0.000953998	0.00245684
234	0.028228	0.010503	0.022098	0.014757	0.000294667	0.00103981	0.00236008
234.24	0.028091	0.010677	0.022574	0.014632	0.000185425	0.000682275	0.00222637
234.48	0.02779	0.01039	0.022265	0.014614	0.00052125	0.00093647	0.00246609
234.72	0.028124	0.010413	0.022438	0.014815	0.000172232	0.000980055	0.00253227
234.96	0.027893	0.010467	0.022505	0.014785	0.000672142	0.000720988	0.00217338
235.2	0.028254	0.010424	0.022235	0.014666	0.000212863	0.000606985	0.00265679
235.44	0.028405	0.010736	0.022184	0.014704	0.000261092	0.000930384	0.00222427
235.68	0.028386	0.010335	0.022277	0.01459	0.000398783	0.000911825	0.00223114
235.92	0.028333	0.010507	0.022528	0.014551	0.000541136	0.000988449	0.00252498
236.16	0.028061	0.010873	0.022293	0.014568	0.000255553	0.000930867	0.00224619
236.4	0.027952	0.010511	0.022352	0.014367	0.000467667	0.000897644	0.00235057
236.64	0.027901	0.010303	0.022166	0.014375	0.000382041	0.000693661	0.00211884
236.88	0.027782	0.010491	0.02253	0.014534	0.000535801	0.0012336	0.00235032
237.12	0.028363	0.010126	0.022148	0.014582	0.000299555	0.000789796	0.00227967
237.36	0.027713	0.010374	0.02219	0.014833	0.000214903	0.00063015	0.00246929
237.6	0.027572	0.010346	0.022148	0.01464	0.000428889	0.000839701	0.0022969
237.84	0.02805	0.010232	0.022157	0.014844	8.9448e-05	0.000543759	0.00227392
238.08	0.028006	0.010513	0.022126	0.014349	0.000501851	0.000561886	0.00256265
238.32	0.028251	0.010416	0.022277	0.014867	0.000664625	0.000988061	0.00245212
238.56	0.02818	0.010082	0.022135	0.014511	0.000646486	0.000711421	0.00231557
238.8	0.028421	0.010308	0.02229	0.014682	0.000248915	0.000650301	0.00249103
239.04	0.028113	0.010424	0.022087	0.014739	6.86923e-05	0.000971613	0.00202643
239.28	0.027756	0.010142	0.022184	0.014475	0.000311552	0.000658738	0.00241769
239.52	0.027924	0.010263	0.021982	0.014402	0.000327832	0.000854445	0.00267602
239.76	0.028438	0.010528	0.022493	0.014317	0.000238184	0.000984935	0.00228373

## Sheet: Control
	Nucleotide depleted				plus GTP
Time	Exp1	Exp2	Exp3	Exp4	Exp1	Exp2	Exp3	Exp4
0	-5.6e-07	0.000117	0.00018744		0.00025296	-5.97e-05	3.65e-05
0.24	-0.00033	7.74e-05	0.00011744		0.00013296	-0.00014	-0.00019
0.48	-0.00027	7.74e-05	0.00013744		-0.000127	-9.68e-06	0.000196
0.72	-5.6e-07	9.74e-05	5.744e-05		3.296e-05	-2.97e-05	8.65e-05
0.96	-0.00014	0.000327	0.00034744		-0.000317	-9.68e-06	-4.4e-05
1.2	-0.00021	0.000307	0.00042744		-0.000147	2.03e-05	-7.4e-05
1.44	-0.00017	9.74e-05	0.00037744		-0.000247	-7.97e-05	6.65e-05
1.68	-0.00014	-5.3e-05	-2.256e-05		0.00017296	-0.0002	0.000306
1.92	-0.00015	0.000187	0.00021744		-0.000247	3.03e-05	1.65e-05
2.16	2.94e-05	0.000187	0.00021744		-0.000147	-9.68e-06	-2.4e-05
2.4	9.44e-06	7.44e-06	4.744e-05		8.296e-05	-0.00023	-0.00011
2.64	-8.1e-05	0.000207	0.00019744		9.296e-05	9.03e-05	9.65e-05
2.88	-2.1e-05	0.000277	7.744e-05		-0.000147	3.2e-07	0.000146
3.12	-0.0001	-0.00038	0.00017744		2.96e-06	0.0001	0.000186
3.36	0.000169	-0.00028	0.00013744		6.296e-05	2.03e-05	-1.4e-05
3.6	-0.00017	-0.00016	2.744e-05		0.00013296	0.00012	-7.4e-05
3.84	9.94e-05	-2.6e-06	8.744e-05		0.00034296	0.00024	4.65e-05
4.08	-5.1e-05	7.44e-06	0.00020744		-9.704e-05	-4.97e-05	8.65e-05
4.32	0.000419	-0.00028	0.00014744		-7.04e-06	-0.00013	-0.00017
4.56	-3.1e-05	0.000197	0.00014744		-4.704e-05	-0.00011	4.65e-05
4.8	-7.1e-05	-0.00011	0.00023744		0.00019296	-0.00015	6.48e-06
5.04	-0.00015	7.74e-05	2.744e-05		-1.704e-05	-6.97e-05	6.65e-05
5.28	4.94e-05	-2.3e-05	0.00025744		-8.704e-05	4.03e-05	0.000116
5.52	-7.1e-05	0.000117	0.00014744		3.296e-05	-0.00021	8.65e-05
5.76	-2.1e-05	0.000237	8.744e-05		-0.000347	6.03e-05	6.65e-05
6	-1.1e-05	8.74e-05	0.00036744		0.00028296	-3.97e-05	-3.4e-05
6.24	3.94e-05	7.74e-05	2.744e-05		-0.000327	-4.97e-05	0.000136
6.48	-9.1e-05	-0.0001	0.00029744		-5.704e-05	-0.00014	3.65e-05
6.72	0.000179	4.74e-05	2.744e-05		0.00026296	1.03e-05	2.65e-05
6.96	-0.00019	2.74e-05	0.00013744		-0.000137	7.03e-05	-6.4e-05
7.2	0.000249	0.000237	0.00012744		0.00025296	-2.97e-05	9.65e-05
7.44	-3.1e-05	-2.6e-06	0.00018744		-7.04e-06	2.03e-05	-5.4e-05
7.68	-5.1e-05	9.74e-05	0.00028744		-8.704e-05	2.03e-05	-4.4e-05
7.92	3.94e-05	3.74e-05	8.744e-05		8.296e-05	3.03e-05	-6.4e-05
8.16	0.000179	0.000257	0.00020744		-0.000217	0.00016	0.000226
8.4	0.000199	0.000127	0.00019744		6.296e-05	-8.97e-05	-3.4e-05
8.64	5.94e-05	-9.3e-05	0.00017744		-0.000247	0.00024	9.65e-05
8.88	-0.00017	-0.0002	0.00010744		0.00032296	-0.00013	5.65e-05
9.12	0.000379	8.74e-05	3.744e-05		0.00018296	-2.97e-05	5.65e-05
9.36	-0.0003	-6.3e-05	0.00022744		0.00013296	0.0001	9.65e-05
9.6	-2.1e-05	0.000147	-8.256e-05		0.00023296	-0.00015	6.65e-05
9.84	-0.00023	2.74e-05	0.00017744		6.296e-05	-9.68e-06	-4.4e-05
10.08	-0.00013	-7.3e-05	0.00023744		0.00010296	-4.97e-05	5.65e-05
10.32	9.44e-06	-0.00014	0.00017744		-1.704e-05	1.03e-05	-3.5e-06
10.56	2.94e-05	4.74e-05	0.00023744		6.296e-05	0.00015	7.65e-05
10.8	5.94e-05	0.000107	0.00030744		0.00026296	7.03e-05	0.000186
11.04	-3.1e-05	-0.00032	0.00032744		-0.000137	-0.00021	-4.4e-05
11.28	0.000259	0.000157	0.00027744		-1.704e-05	7.03e-05	4.65e-05
11.52	-0.00033	-6.3e-05	0.00027744		-0.000107	1.03e-05	-0.00025
11.76	0.000149	5.74e-05	9.744e-05		0.00017296	3.2e-07	-3.5e-06
12	1.94e-05	-2.6e-06	0.00036744		0.00013296	-3.97e-05	5.65e-05
12.24	-0.00018	4.74e-05	0.00013744		-0.000167	0.00031	-9.4e-05
12.48	3.94e-05	-2.3e-05	0.00017744		7.296e-05	1.03e-05	-7.4e-05
12.72	4.94e-05	-4.3e-05	-0.00011256		-5.704e-05	7.03e-05	-3.4e-05
12.96	0.000189	-2.6e-06	0.00013744		-0.000297	2.03e-05	-0.00017
13.2	-0.00014	0.000177	0.00017744		-0.000177	1.03e-05	-4.4e-05
13.44	3.94e-05	6.74e-05	7.744e-05		-0.000157	0.00019	-8.4e-05
13.68	-0.00024	0.000137	-1.256e-05		3.296e-05	0.00017	4.65e-05
13.92	-0.00019	7.74e-05	0.00017744		-5.704e-05	0.00027	0.000146
14.16	9.44e-06	0.000167	8.744e-05		2.296e-05	9.03e-05	-0.0003
14.4	-3.1e-05	-0.00018	0.00023744		-0.000127	-0.00021	5.65e-05
14.64	-9.1e-05	-4.3e-05	0.00015744		-0.000397	0.00013	0.000106
14.88	5.94e-05	1.74e-05	1.744e-05		-0.000147	-5.97e-05	-1.4e-05
15.12	0.000429	-0.00015	0.00020744		0.00013296	-2.97e-05	8.65e-05
15.36	-2.1e-05	-2.3e-05	-2.256e-05		-0.000137	-0.00015	6.65e-05
15.6	-4.1e-05	3.74e-05	0.00012744		0.00019296	-0.00017	0.000156
15.84	0.000229	-0.00012	1.744e-05		0.00029296	-4.97e-05	0.000126
16.08	0.000409	-1.3e-05	0.00030744		0.00029296	-9.68e-06	-0.00016
16.32	6.94e-05	-0.0001	0.00015744		4.296e-05	2.03e-05	2.65e-05
16.56	-2.1e-05	3.74e-05	0.00021744		2.296e-05	-5.97e-05	0.000146
16.8	-0.00024	-0.00031	0.00012744		3.296e-05	5.03e-05	-5.4e-05
17.04	-0.00016	2.74e-05	-8.256e-05		-7.704e-05	0.00018	-3.4e-05
17.28	0.000549	0.000187	0.00015744		-0.000107	-0.00014	1.65e-05
17.52	-0.00018	0.000167	0.00020744		-7.04e-06	-0.00011	-0.00012
17.76	-2.1e-05	5.74e-05	-3.256e-05		-8.704e-05	-3.97e-05	-0.00014
18	5.94e-05	-0.00023	4.744e-05		0.00011296	-4.97e-05	-5.4e-05
18.24	-0.00045	0.000267	0.00020744		-3.704e-05	0.00011	3.65e-05
18.48	0.000179	2.74e-05	-2.256e-05		2.96e-06	-0.00015	-0.00012
18.72	0.000209	-0.00012	0.00037744		2.96e-06	0.00015	3.65e-05
18.96	4.94e-05	-1.3e-05	0.00012744		-6.704e-05	0.00012	-0.0001
19.2	-0.00017	6.74e-05	0.00010744		-7.04e-06	-0.00018	0.000176
19.44	0.000119	-5.3e-05	0.00030744		0.00023296	2.03e-05	7.65e-05
19.68	-9.1e-05	6.74e-05	5.744e-05		0.00025296	0.00013	-0.00013
19.92	4.94e-05	-0.00012	0.00037744		5.296e-05	-0.00026	4.65e-05
20.16	-7.1e-05	-3.3e-05	7.44e-06		2.96e-06	-7.97e-05	0.000206
20.4	8.94e-05	-3.3e-05	0.00021744		0.00018296	4.03e-05	-0.00029
20.64	-5.1e-05	-1.3e-05	0.00014744		7.296e-05	-0.00014	-5.4e-05
20.88	-0.00012	-0.00027	-3.256e-05		-6.704e-05	2.03e-05	0.000126
21.12	9.44e-06	-0.00022	6.744e-05		-7.704e-05	0.00017	-0.00012
21.36	-0.00022	0.000237	5.744e-05		1.296e-05	0.0001	3.65e-05
21.6	-0.00021	-0.00018	0.00028744		-0.000127	0.00017	-8.4e-05
21.84	0.000179	0.000117	0.00012744		0.00015296	5.03e-05	-0.00024
22.08	-0.00016	-0.0001	0.00027744		0.00017296	5.03e-05	-0.0001
22.32	-0.00018	-0.00024	0.00011744		-0.000227	-1.97e-05	-7.4e-05
22.56	-4.1e-05	-0.00028	0.00023744		0.00030296	8.03e-05	-0.00012
22.8	0.000109	-0.00011	-2.56e-06		-2.704e-05	2.03e-05	5.65e-05
23.04	0.000129	3.74e-05	7.44e-06		-0.000287	9.03e-05	-3.5e-06
23.28	-0.00013	0.000157	-7.256e-05		0.00012296	3.2e-07	0.000126
23.52	-0.00015	0.000107	0.00023744		-0.000217	-1.97e-05	1.65e-05
23.76	0.000279	0.000207	0.00027744		-4.704e-05	6.03e-05	-0.00017
24	-4.1e-05	-5.3e-05	0.00011744		-1.704e-05	0.00016	6.65e-05
24.24	0.000389	8.74e-05	5.744e-05		-7.704e-05	2.03e-05	-9.4e-05
24.48	-0.00022	-0.00016	0.00034744		-0.000197	-3.97e-05	9.65e-05
24.72	0.000159	-0.00022	-0.00012256		2.96e-06	-7.97e-05	8.65e-05
24.96	8.94e-05	-1.3e-05	3.744e-05		0.00021296	0.00011	-0.00022
25.2	4.94e-05	1.74e-05	7.744e-05		-6.704e-05	3.2e-07	-2.4e-05
25.44	6.94e-05	0.000157	0.00019744		-0.000377	4.03e-05	-0.00012
25.68	-4.1e-05	-0.00011	-1.256e-05		0.00019296	7.03e-05	8.65e-05
25.92	8.94e-05	0.000157	0.00037744		-0.000187	0.0001	-9.4e-05
26.16	0.000169	-0.00031	7.44e-06		-0.000127	-0.00011	-5.4e-05
26.4	-0.00011	-0.00032	7.44e-06		4.296e-05	-0.00019	-9.4e-05
26.64	-0.00012	0.000177	7.44e-06		0.00027296	-0.00018	0.000146
26.88	0.000269	8.74e-05	8.744e-05		-4.704e-05	-0.00023	-8.4e-05
27.12	-5.6e-07	7.74e-05	0.00022744		0.00012296	1.03e-05	4.65e-05
27.36	-0.00029	-0.00027	0.00025744		6.296e-05	7.03e-05	-1.4e-05
27.6	0.000239	-8.3e-05	2.744e-05		-0.000177	-9.68e-06	-5.4e-05
27.84	-4.1e-05	0.000227	0.00017744		-0.000287	0.00017	-8.4e-05
28.08	-0.0002	-0.00015	-1.256e-05		-6.704e-05	-8.97e-05	-0.0001
28.32	0.000289	7.44e-06	9.744e-05		0.00034296	-1.97e-05	3.65e-05
28.56	-0.00011	-0.00012	0.00032744		-7.704e-05	-0.00016	-9.4e-05
28.8	0.000149	-0.0001	0.00023744		4.296e-05	8.03e-05	-5.4e-05
29.04	-0.00024	6.74e-05	0.00030744		-0.000127	1.03e-05	-0.0002
29.28	0.000289	-0.00017	-5.256e-05		-0.000277	-9.68e-06	5.65e-05
29.52	4.94e-05	-0.00023	-2.256e-05		0.00021296	-0.00022	6.65e-05
29.76	0.000319	-4.3e-05	0.00041744		0.00015296	0.00027	0.000176
30	0.000409	0.000207	0.00056744		0.00024296	7.03e-05	-0.00019
30.24	0.000349	0.000497	0.00038744		0.00023296	0.00024	-2.4e-05
30.48	0.000379	0.000387	-0.00853256		0.00020296	0.00016	6.48e-06
30.72	-0.00743	-0.00876	-0.0460926		-0.009807	-0.00957	-0.0093
30.96	-0.03948	-0.04487	0.0169074		-0.047817	-0.04938	-0.04608
31.2	0.014879*	0.018217*	-0.01590256*		0.01844296*	0.017940*	0.016356*
31.44	-0.01379	-0.01585	0.00034744		-0.016487	-0.01738	-0.01623
31.68	0.000459	0.000597	0.00049744		0.00043296	0.00076	0.000296
31.92	0.000449	0.000337	0.00038744		-0.000247	0.00069	-3.4e-05
32.16	0.000519	0.000417	0.00016744		0.00022296	0.00074	0.000186
32.4	0.000319	0.000487	0.00021744		0.00031296	0.00044	2.65e-05
32.64	0.000379	0.000367	0.00026744		0.00017296	0.00048	6.65e-05
32.88	0.000169	0.000347	0.00055744		0.00035296	0.00057	6.65e-05
33.12	0.000269	0.000547	-2.56e-06		-0.000177	0.00039	7.65e-05
33.36	0.000169	0.000417	0.00029744		0.00030296	0.00065	-0.0001
33.6	0.000279	0.000737	0.00030744		-7.704e-05	0.00037	1.65e-05
33.84	0.000589	0.000427	0.00014744		8.296e-05	0.0005	7.65e-05
34.08	9.44e-06	0.000207	0.00032744		-6.704e-05	0.00047	-4.4e-05
34.32	0.000179	0.000487	0.00027744		8.296e-05	0.00029	-5.4e-05
34.56	8.94e-05	2.74e-05	0.00031744		0.00010296	0.00047	6.65e-05
34.8	-6.1e-05	0.000357	0.00014744		0.00017296	0.00053	-0.00013
35.04	0.000369	0.000247	0.00029744		0.00025296	0.00041	0.000106
35.28	8.94e-05	0.000347	0.00027744		-4.704e-05	0.00046	-0.00021
35.52	0.000469	0.000187	0.00028744		0.00015296	0.00058	7.65e-05
35.76	0.000309	0.000127	0.00029744		-6.704e-05	0.00049	-0.00018
36	-0.00039	0.000427	0.00013744		8.296e-05	0.00077	1.65e-05
36.24	0.000429	0.000487	0.00010744		0.00011296	0.00061	7.65e-05
36.48	0.000419	3.74e-05	0.00023744		2.96e-06	0.0006	-0.00021
36.72	0.000189	0.000127	0.00014744		2.296e-05	0.00048	-1.4e-05
36.96	0.000419	0.000307	0.00032744		-6.704e-05	0.00044	-9.4e-05
37.2	-5.6e-07	0.000457	0.00026744		0.00060296	0.00043	-0.00031
37.44	0.000529	6.74e-05	0.00030744		0.00014296	0.00068	-0.00011
37.68	8.94e-05	0.000407	0.00031744		-0.000257	0.00074	5.65e-05
37.92	-7.1e-05	0.000287	0.00042744		0.00034296	0.00064	1.65e-05
38.16	0.000689	0.000287	0.00037744		-0.000137	0.00052	-4.4e-05
38.4	0.000269	0.000427	0.00057744		0.00015296	0.0005	0.000146
38.64	-1.1e-05	0.000157	0.00028744		-0.000107	0.0006	6.65e-05
38.88	-7.1e-05	0.000197	0.00053744		8.296e-05	0.00041	-4.4e-05
39.12	7.94e-05	0.000287	0.00018744		0.00017296	0.00055	-6.4e-05
39.36	0.000199	0.000217	0.00029744		0.00014296	0.00034	-4.4e-05
39.6	0.000309	8.74e-05	0.00025744		0.00014296	0.00047	0.000266
39.84	9.44e-06	0.000397	0.00018744		-0.000177	0.00054	-0.00016
40.08	-0.00023	0.000307	0.00018744		-0.000307	0.0005	-0.00013
40.32	-8.1e-05	0.000237	0.00033744		0.00027296	0.00036	-8.4e-05
40.56	0.000119	0.000167	0.00026744		0.00025296	0.00038	0.000116
40.8	0.000129	0.000417	0.00042744		0.00013296	0.00046	-2.4e-05
41.04	0.000119	0.000337	0.00018744		0.00011296	0.00063	8.65e-05
41.28	0.000129	0.000207	0.00050744		0.00035296	0.00059	-2.4e-05
41.52	0.000219	0.000237	0.00039744		0.00031296	0.00045	-6.4e-05
41.76	0.000109	8.74e-05	0.00025744		3.296e-05	0.00027	1.65e-05
42	7.94e-05	0.000147	0.00022744		0.00028296	0.00066	-7.4e-05
42.24	-1.1e-05	0.000187	0.00029744		0.00013296	0.00048	-3.4e-05
42.48	9.44e-06	0.000127	0.00015744		0.00025296	0.0005	-0.0001
42.72	0.000339	0.000267	5.744e-05		0.00032296	0.00053	-0.0002
42.96	9.44e-06	0.000107	2.744e-05		-0.000107	0.00031	3.65e-05
43.2	0.000219	0.000277	0.00033744		0.00036296	0.00055	0.000116
43.44	0.000329	0.000387	0.00031744		0.00014296	0.00039	-0.00019
43.68	0.000339	5.74e-05	-2.56e-06		0.00034296	0.00045	-0.00013
43.92	0.000779	0.000217	0.00021744		0.00026296	0.00046	-3.5e-06
44.16	0.000649	-3.3e-05	0.00014744		0.00040296	0.00068	-2.4e-05
44.4	0.000219	0.000467	0.00020744		-3.704e-05	0.00053	7.65e-05
44.64	-0.00033	0.000167	6.744e-05		-9.704e-05	0.00037	2.65e-05
44.88	0.000339	2.74e-05	3.744e-05		2.296e-05	0.00058	-0.0001
45.12	0.000209	9.74e-05	8.744e-05		0.00047296	0.00065	-6.4e-05
45.36	0.000279	0.000247	0.00022744		4.296e-05	0.0005	-9.4e-05
45.6	-0.00014	0.000407	0.00023744		0.00017296	0.00052	0.000156
45.84	0.000389	0.000367	0.00023744		0.00028296	0.00079	-6.4e-05
46.08	0.000149	0.000107	0.00019744		-2.704e-05	0.00058	0.000176
46.32	-7.1e-05	0.000157	0.00026744		-8.704e-05	0.00065	6.65e-05
46.56	0.000199	0.000417	3.744e-05		0.00021296	0.00065	-4.4e-05
46.8	0.000289	-5.3e-05	0.00025744		3.296e-05	0.0004	8.65e-05
47.04	0.000249	0.000397	0.00024744		-0.000187	0.00052	-9.4e-05
47.28	8.94e-05	0.000237	0.00026744		4.296e-05	0.00065	-1.4e-05
47.52	8.94e-05	0.000367	8.744e-05		-3.704e-05	0.00042	-6.4e-05
47.76	0.000219	0.000237	9.744e-05		-2.704e-05	0.00065	-0.00015
48	0.000159	0.000227	0.00033744		0.00013296	0.00039	-0.0001
48.24	-2.1e-05	0.000277	0.00025744		-7.704e-05	0.00064	0.000266
48.48	0.000179	0.000407	0.00033744		0.00045296	0.00056	-3.5e-06
48.72	0.000239	0.000237	0.00020744		0.00020296	0.00068	-0.00023
48.96	0.000449	0.000347	0.00033744		0.00038296	0.00032	4.65e-05
49.2	1.94e-05	-0.00013	0.00032744		0.00016296	0.00061	0.000166
49.44	-0.00013	0.000137	0.00023744		-1.704e-05	0.00025	-0.00011
49.68	0.000309	0.000227	0.00027744		2.296e-05	0.00037	8.65e-05
49.92	0.000379	0.000407	2.744e-05		0.00014296	0.00047	-0.00014
50.16	0.000269	6.74e-05	0.00036744		0.00011296	0.00055	0.000206
50.4	0.000149	0.000187	0.00016744		7.296e-05	0.00043	-0.0001
50.64	0.000159	0.000237	0.00020744		2.96e-06	0.00052	-0.00028
50.88	8.94e-05	0.000257	0.00013744		0.00028296	0.00037	3.65e-05
51.12	7.94e-05	0.000177	0.00033744		9.296e-05	0.00057	-4.4e-05
51.36	0.000189	0.000437	0.00018744		0.00027296	0.00071	-0.00017
51.6	0.000389	0.000187	0.00018744		0.00029296	0.00066	5.65e-05
51.84	0.000309	0.000367	0.00024744		-0.000127	0.00042	-6.4e-05
52.08	2.94e-05	0.000167	4.744e-05		-7.704e-05	0.00073	9.65e-05
52.32	0.000249	0.000537	0.00026744		4.296e-05	0.00065	-0.00018
52.56	8.94e-05	0.000347	0.00030744		0.00031296	0.00061	6.65e-05
52.8	8.94e-05	0.000107	0.00029744		0.00030296	0.0007	-0.00013
53.04	0.000209	0.000327	5.744e-05		0.00045296	0.00066	-3.5e-06
53.28	0.000219	5.74e-05	0.00025744		7.296e-05	0.00062	-0.00016
53.52	0.000259	0.000367	0.00023744		-0.000207	0.00075	-0.00013
53.76	1.94e-05	9.74e-05	0.00022744		0.00015296	0.00053	-0.0001
54	0.000109	0.000407	0.00027744		0.00024296	0.00041	6.48e-06
54.24	-6.1e-05	1.74e-05	0.00021744		0.00028296	0.00039	-0.00023
54.48	-3.1e-05	0.000397	-8.256e-05		6.296e-05	0.00054	-0.00017
54.72	0.000299	0.000347	0.00047744		0.00023296	0.00042	0.000146
54.96	3.94e-05	0.000247	0.00025744		0.00016296	0.00061	-0.00019
55.2	0.000109	-2.3e-05	0.00014744		3.296e-05	0.00047	0.000186
55.44	9.44e-06	0.000297	0.00015744		-4.704e-05	0.00037	3.65e-05
55.68	0.000399	0.000107	6.744e-05		1.296e-05	0.00065	3.65e-05
55.92	0.000589	0.000317	0.00033744		-0.000187	0.0007	-0.00013
56.16	0.000169	0.000247	0.00018744		9.296e-05	0.00052	-1.4e-05
56.4	0.000119	0.000187	9.744e-05		8.296e-05	0.00046	-0.00012
56.64	-0.00015	0.000327	0.00023744		-0.000117	0.00046	-0.00016
56.88	0.000289	0.000397	0.00029744		-9.704e-05	0.00023	4.65e-05
57.12	-0.0001	0.000307	0.00023744		7.296e-05	0.00066	-0.00016
57.36	0.000179	0.000187	0.00040744		-7.704e-05	0.0005	6.65e-05
57.6	0.000249	-2.3e-05	4.744e-05		0.00024296	0.00064	-9.4e-05
57.84	9.94e-05	0.000157	0.00012744		0.00029296	0.00036	-0.00015
58.08	0.000169	0.000167	0.00015744		8.296e-05	0.00046	-8.4e-05
58.32	-0.00017	-0.00026	0.00030744		-7.704e-05	0.00065	7.65e-05
58.56	0.000279	0.000397	0.00015744		0.00012296	0.00054	-0.00036
58.8	0.000359	0.000207	0.00019744		0.00019296	0.00051	-4.4e-05
59.04	0.000279	-0.00019	0.00018744		0.00025296	0.00049	-0.00022
59.28	2.94e-05	0.000207	8.744e-05		-0.000187	0.0005	-6.4e-05
59.52	0.000449	0.000167	0.00015744		-8.704e-05	0.00059	-5.4e-05
59.76	0.000179	0.000367	0.00018744		-0.000187	0.00061	-0.0001
60	-0.00013	0.000427	0.00036744		0.00027296	0.00044	-0.0001
60.24	-1.1e-05	-0.00016	0.00021744		0.00016296	0.00042	7.65e-05
60.48	9.44e-06	0.000127	0.00019744		0.00034296	0.00057	6.48e-06
60.72	-9.1e-05	0.000137	0.00012744		0.00012296	0.00067	2.65e-05
60.96	8.94e-05	0.000367	-5.256e-05		0.00039296	0.00057	-0.00015
61.2	5.94e-05	7.44e-06	0.00010744		0.00024296	0.00062	-0.00018
61.44	3.94e-05	0.000157	0.00031744		-2.704e-05	0.0006	-7.4e-05
61.68	-0.00017	0.000227	0.00034744		0.00018296	0.00067	-0.0003
61.92	-0.00021	2.74e-05	0.00038744		-0.000137	0.00042	3.65e-05
62.16	-3.1e-05	0.000407	0.00027744		0.00013296	0.00068	-0.00027
62.4	0.000209	0.000347	0.00025744		-1.704e-05	0.00036	-0.00024
62.64	5.94e-05	0.000197	0.00020744		-1.704e-05	0.0006	-0.00011
62.88	0.000159	-5.3e-05	0.00015744		4.296e-05	0.00044	-0.00023
63.12	0.000159	0.000427	0.00021744		2.296e-05	0.00039	-0.00016
63.36	0.000219	1.74e-05	0.00023744		7.296e-05	0.00044	-6.4e-05
63.6	6.94e-05	0.000117	-8.256e-05		0.00011296	0.00058	0.000116
63.84	0.000409	0.000117	0.00015744		6.296e-05	0.00046	-0.00018
64.08	2.94e-05	0.000467	0.00029744		4.296e-05	0.00037	3.65e-05
64.32	0.000119	0.000207	0.00018744		0.00012296	0.00067	0.000186
64.56	-5.1e-05	0.000377	0.00027744		0.00027296	0.00037	-0.00017
64.8	7.94e-05	0.000117	0.00030744		0.00024296	0.00034	9.65e-05
65.04	-6.1e-05	7.44e-06	0.00039744		9.296e-05	0.00038	-0.00033
65.28	0.000529	-8.3e-05	0.00028744		8.296e-05	0.00059	-9.4e-05
65.52	0.000209	0.000277	0.00013744		-9.704e-05	0.00053	-0.00019
65.76	6.94e-05	0.000207	0.00022744		0.00048296	0.00048	0.000366
66	0.000139	0.000367	0.00012744		3.296e-05	0.00055	-0.00014
66.24	0.000409	0.000107	0.00012744		0.00018296	0.00045	0.000106
66.48	0.000179	0.000237	-1.256e-05		0.00016296	0.00079	-4.4e-05
66.72	5.94e-05	0.000137	0.00013744		-8.704e-05	0.00036	-0.00024
66.96	-0.00011	0.000147	0.00030744		0.00016296	0.00062	-9.4e-05
67.2	-0.00012	0.000127	-2.56e-06		0.00018296	0.00056	6.65e-05
67.44	0.000399	0.000137	0.00014744		0.00032296	0.00048	-0.00013
67.68	0.000209	0.000397	-3.256e-05		7.296e-05	0.00059	-4.4e-05
67.92	0.000169	0.000117	6.744e-05		2.96e-06	0.00075	6.48e-06
68.16	0.000469	-4.3e-05	0.00013744		0.00015296	0.00032	1.65e-05
68.4	1.94e-05	-8.3e-05	0.00021744		-0.000107	0.00065	-0.00022
68.64	0.000509	-2.6e-06	9.744e-05		0.00017296	0.00045	-0.00013
68.88	-4.1e-05	-6.3e-05	0.00027744		0.00026296	0.00047	-0.0002
69.12	0.000159	0.000317	4.744e-05		9.296e-05	0.00048	7.65e-05
69.36	-1.1e-05	0.000127	-7.256e-05		0.00025296	0.00043	-0.00014
69.6	0.000149	0.000507	0.00012744		9.296e-05	0.00068	0.000106
69.84	0.000179	0.000107	7.744e-05		5.296e-05	0.00053	-5.4e-05
70.08	0.000399	0.000277	0.00017744		0.00012296	0.00065	0.000126
70.32	9.94e-05	0.000187	0.00018744		0.00047296	0.00043	-0.0002
70.56	0.000149	0.000137	0.00021744		2.96e-06	0.00062	4.65e-05
70.8	0.000189	7.74e-05	4.744e-05		-4.704e-05	0.00031	-0.00012
71.04	9.94e-05	0.000407	-4.256e-05		9.296e-05	0.00042	-1.4e-05
71.28	0.000229	2.74e-05	0.00016744		5.296e-05	0.00031	-6.4e-05
71.52	9.44e-06	0.000157	5.744e-05		3.296e-05	0.00042	-0.00017
71.76	6.94e-05	6.74e-05	0.00013744		-3.704e-05	0.00044	-5.4e-05
72	0.000199	0.000247	0.00012744		-1.704e-05	0.00034	-0.00014
72.24	0.000269	9.74e-05	0.00022744		-3.704e-05	0.00061	-2.4e-05
72.48	9.94e-05	-2.3e-05	0.00022744		0.00016296	0.0006	-0.00025
72.72	-0.0001	6.74e-05	2.744e-05		0.00018296	0.00041	-0.00019
72.96	0.000469	0.000337	0.00035744		0.00016296	0.00049	6.48e-06
73.2	0.000209	0.000217	0.00029744		0.00020296	0.00042	6.65e-05
73.44	0.000399	6.74e-05	0.00018744		-0.000167	0.00049	-0.00016
73.68	-0.00018	0.000427	0.00021744		0.00020296	0.00039	-0.00019
73.92	0.000429	0.000337	0.00036744		5.296e-05	0.00054	-1.4e-05
74.16	6.94e-05	0.000307	-4.256e-05		0.00013296	0.00045	-0.00036
74.4	0.000619	-6.3e-05	0.00026744		-0.000107	0.00032	-6.4e-05
74.64	0.000169	5.74e-05	5.744e-05		0.00019296	0.00041	-3.4e-05
74.88	0.000229	7.74e-05	0.00032744		-3.704e-05	0.00062	0.000276
75.12	0.000409	0.000287	0.00025744		0.00011296	0.00038	-0.00024
75.36	0.000189	0.000357	7.744e-05		3.296e-05	0.00066	-0.00019
75.6	0.000119	0.000157	-2.256e-05		0.00011296	0.0005	-0.00016
75.84	-2.1e-05	-6.3e-05	0.00027744		0.00027296	0.00031	-0.00043
76.08	8.94e-05	0.000187	-2.56e-06		-0.000187	0.00062	-6.4e-05
76.32	9.44e-06	0.000207	0.00025744		0.00027296	0.00042	-0.00016
76.56	0.000419	8.74e-05	0.00023744		7.296e-05	0.00046	-0.00016
76.8	0.000259	8.74e-05	1.744e-05		-9.704e-05	0.00036	-0.0002
77.04	-6.1e-05	8.74e-05	7.744e-05		-0.000207	0.00032	-6.4e-05
77.28	0.000229	8.74e-05	0.00016744		0.00016296	0.00032	6.65e-05
77.52	0.000229	0.000107	0.00010744		0.00033296	0.00043	-0.00016
77.76	0.000339	9.74e-05	0.00012744		2.96e-06	0.00057	-0.0001
78	0.000189	0.000157	-0.00018256		0.00033296	0.00068	-0.00011
78.24	0.000359	0.000227	0.00034744		2.96e-06	0.00093	-0.00013
78.48	0.000379	0.000157	-7.256e-05		0.00010296	0.00068	-0.00017
78.72	0.000109	6.74e-05	0.00029744		-2.704e-05	0.00045	-9.4e-05
78.96	1.94e-05	8.74e-05	0.00014744		-0.000167	0.00082	-1.4e-05
79.2	0.000199	4.74e-05	2.744e-05		-0.000117	0.00051	-0.00011
79.44	0.000319	0.000147	0.00032744		0.00020296	0.00035	-0.00024
79.68	-0.0001	0.000387	0.00035744		-0.000297	0.00048	-5.4e-05
79.92	0.000289	0.000157	8.744e-05		0.00010296	0.00028	-5.4e-05
80.16	0.000249	0.000117	0.00018744		4.296e-05	0.00055	-6.4e-05
80.4	0.000189	-1.3e-05	3.744e-05		0.00024296	0.00042	-0.0001
80.64	0.000209	-0.00024	-9.256e-05		2.296e-05	0.00029	-0.00014
80.88	9.94e-05	-2.6e-06	0.00027744		-2.704e-05	0.0004	0.000166
81.12	0.000169	-9.3e-05	0.00011744		0.00010296	0.00054	-0.00015
81.36	-1.1e-05	0.000217	0.00026744		0.00022296	0.00055	-0.00027
81.6	0.000319	0.000107	0.00022744		0.00014296	0.00035	8.65e-05
81.84	0.000369	-2.3e-05	0.00026744		-0.000277	0.00027	6.65e-05
82.08	-2.1e-05	0.000137	-5.256e-05		3.296e-05	0.00045	-3.5e-06
82.32	0.000289	1.74e-05	0.00020744		0.00014296	0.00039	-0.00021
82.56	0.000169	1.74e-05	3.744e-05		0.00034296	0.00082	-7.4e-05
82.8	3.94e-05	4.74e-05	0.00017744		-2.704e-05	0.00052	6.48e-06
83.04	0.000329	0.000187	0.00024744		-0.000167	0.00057	-0.00017
83.28	6.94e-05	-2.3e-05	0.00010744		-0.000207	0.0007	-0.0002
83.52	0.000229	0.000177	0.00017744		0.00029296	0.00032	-0.00025
83.76	0.000239	0.000467	0.00016744		0.00010296	0.00025	-0.00025
84	-0.00011	0.000127	0.00013744		0.00020296	0.00058	-6.4e-05
84.24	-7.1e-05	0.000127	-2.56e-06		0.00038296	0.00049	-0.00025
84.48	9.94e-05	0.000217	0.00016744		-0.000207	0.0003	-0.00012
84.72	-1.1e-05	0.000197	0.00011744		0.00034296	0.00036	-0.00021
84.96	2.94e-05	-0.0001	0.00023744		-0.000457	0.00019	-0.00029
85.2	0.000149	4.74e-05	9.744e-05		0.00019296	0.0003	-0.00027
85.44	0.000279	0.000217	0.00013744		-0.000177	0.0003	-3.4e-05
85.68	0.000139	2.74e-05	1.744e-05		2.96e-06	0.00041	-1.4e-05
85.92	4.94e-05	-2.3e-05	0.00019744		5.296e-05	0.00046	-8.4e-05
86.16	0.000219	0.000167	0.00033744		0.00021296	0.00046	-0.00014
86.4	-0.00016	-4.3e-05	-0.00013256		0.00021296	0.00044	-0.00017
86.64	-0.00018	0.000117	0.00012744		-7.704e-05	0.00024	-0.00018
86.88	-5.6e-07	3.74e-05	0.00021744		-0.000167	0.00015	-7.4e-05
87.12	0.000359	7.44e-06	1.744e-05		0.00010296	0.00019	4.65e-05
87.36	0.000409	-0.00015	0.00011744		-3.704e-05	0.00027	-0.00023
87.6	-0.00013	0.000167	0.00019744		8.296e-05	0.00029	-8.4e-05
87.84	0.000159	9.74e-05	0.00030744		-7.04e-06	0.00047	-0.0002
88.08	0.000279	0.000187	-1.256e-05		-0.000267	0.00061	-0.00012
88.32	0.000279	0.000177	0.00027744		0.00015296	0.00054	-0.00013
88.56	-5.1e-05	0.000157	0.00027744		-4.704e-05	0.00035	4.65e-05
88.8	0.000339	0.000297	3.744e-05		-0.000177	0.00018	-0.00016
89.04	8.94e-05	7.44e-06	0.00012744		0.00016296	0.00024	-0.00028
89.28	-0.00015	0.000317	7.44e-06		7.296e-05	0.00028	-0.00034
89.52	0.000429	0.000157	0.00023744		0.00022296	0.00054	-0.0001
89.76	0.000229	0.000447	0.00014744		2.296e-05	0.00051	5.65e-05
90	0.000239	0.000337	0.00037744		-0.000307	0.00042	-0.00012
90.24	0.000419	0.000297	7.744e-05		9.296e-05	0.00023	-0.00028
90.48	9.94e-05	-3.3e-05	0.00012744		-6.704e-05	0.00043	-0.00015
90.72	-7.1e-05	-0.00032	-1.256e-05		0.00042296	0.00039	-0.00017
90.96	0.000189	-2.6e-06	0.00017744		8.296e-05	0.00048	-0.0001
91.2	-0.0001	0.000287	3.744e-05		-0.000107	0.00022	-0.00016
91.44	0.000199	0.000287	0.00017744		-0.000117	0.00021	-0.0001
91.68	-0.00019	0.000187	6.744e-05		-0.000107	0.00027	-0.00015
91.92	0.000129	0.000257	0.00011744		0.00012296	9.03e-05	-0.00013
92.16	-0.00029	-2.6e-06	-4.256e-05		1.296e-05	0.00048	-0.00031
92.4	0.000159	0.000267	-3.256e-05		-2.704e-05	0.00014	-0.00022
92.64	0.000209	-0.00012	0.00022744		-0.000177	0.00039	-0.00016
92.88	0.000359	0.000307	-8.256e-05		0.00013296	0.00037	-0.00016
93.12	0.000209	0.000367	1.744e-05		0.00027296	0.00062	-3.4e-05
93.36	0.000499	0.000367	-5.256e-05		0.00027296	0.00066	-0.00036
93.6	0.000359	3.74e-05	0.00031744		0.00030296	0.00032	-0.00028
93.84	0.000219	3.74e-05	0.00011744		7.296e-05	0.00026	-2.4e-05
94.08	0.000409	9.74e-05	0.00028744		-5.704e-05	0.00017	-0.0003
94.32	0.000309	0.000157	0.00024744		-5.704e-05	0.00039	0.000126
94.56	0.000439	0.000297	5.744e-05		-0.000137	0.0004	-0.00018
94.8	0.000239	7.74e-05	0.00018744		0.00011296	0.00041	5.65e-05
95.04	0.000139	0.000127	5.744e-05		-2.704e-05	0.00011	-0.00018
95.28	0.000169	-8.3e-05	-0.00013256		-0.000117	0.00017	-0.00027
95.52	-0.00012	0.000197	0.00052744		2.296e-05	0.00047	-0.0003
95.76	-5.1e-05	0.000167	-4.256e-05		-6.704e-05	0.00039	-0.00023
96	0.000309	-6.3e-05	2.744e-05		-0.000197	0.00036	-0.0001
96.24	0.000109	-0.00011	0.00034744		0.00024296	0.00026	-0.00035
96.48	0.000189	-5.3e-05	0.00035744		0.00014296	0.00035	-0.00028
96.72	0.000399	0.000307	8.744e-05		-9.704e-05	0.00043	-0.00024
96.96	0.000229	0.000377	4.744e-05		0.00014296	0.00024	-0.00046
97.2	0.000189	1.74e-05	-2.256e-05		-3.704e-05	0.00063	-0.00024
97.44	0.000239	0.000237	0.00032744		4.296e-05	0.00052	-0.00029
97.68	-1.1e-05	4.74e-05	-1.256e-05		7.296e-05	0.00035	-0.00023
97.92	0.000229	-5.3e-05	0.00041744		-1.704e-05	0.00043	-0.00017
98.16	0.000209	4.74e-05	0.00015744		7.296e-05	0.00047	-0.0002
98.4	9.44e-06	-5.3e-05	-2.56e-06		-0.000107	0.00018	-0.00038
98.64	0.000349	0.000167	-6.256e-05		-4.704e-05	0.00034	-0.00017
98.88	2.94e-05	-5.3e-05	-4.256e-05		0.00029296	0.00046	-0.00013
99.12	5.94e-05	0.000427	0.00024744		0.00013296	0.00032	-0.00025
99.36	4.94e-05	0.000137	0.00011744		-1.704e-05	0.00057	-8.4e-05
99.6	0.000449	0.000537	1.744e-05		-0.000297	0.00048	2.65e-05
99.84	4.94e-05	-1.3e-05	0.00015744		0.00010296	0.00038	-9.4e-05
100.08	-6.1e-05	-2.6e-06	0.00012744		-0.000187	0.00041	-0.00031
100.32	0.000409	0.000367	4.744e-05		1.296e-05	0.00034	-0.00011
100.56	0.000219	0.000127	7.744e-05		5.296e-05	0.00049	-4.4e-05
100.8	0.000209	0.000117	0.00016744		0.00010296	0.00044	-0.00014
101.04	7.94e-05	-7.3e-05	2.744e-05		2.296e-05	0.00032	-3.4e-05
101.28	6.94e-05	-0.00012	5.744e-05		0.00010296	0.00027	-0.00022
101.52	0.000379	-0.00011	-2.56e-06		7.296e-05	0.00038	-9.4e-05
101.76	-0.00014	1.74e-05	2.744e-05		-0.000297	0.00041	-0.00018
102	0.000179	8.74e-05	5.744e-05		8.296e-05	0.00036	-0.00021
102.24	0.000439	7.44e-06	8.744e-05		-7.704e-05	0.00043	-0.00023
102.48	0.000259	5.74e-05	0.00023744		-0.000137	0.00059	-0.00052
102.72	5.94e-05	0.000277	0.00034744		2.96e-06	0.00022	-0.00016
102.96	0.000239	0.000297	-1.256e-05		0.00024296	0.00026	-0.00025
103.2	9.94e-05	-1.3e-05	0.00018744		-5.704e-05	0.00043	-0.00021
103.44	0.000109	0.000227	0.00014744		-3.704e-05	0.00021	-0.00043
103.68	9.44e-06	0.000347	8.744e-05		2.96e-06	0.00029	6.48e-06
103.92	4.94e-05	0.000157	-5.256e-05		0.00019296	0.00046	-0.00028
104.16	0.000429	0.000387	-0.00014256		8.296e-05	0.00055	-0.00014
104.4	0.000229	-0.0001	5.744e-05		0.00015296	0.00072	-0.00033
104.64	0.000359	-0.0001	-8.256e-05		-9.704e-05	0.00046	-0.00016
104.88	0.000299	-0.00018	-2.256e-05		-3.704e-05	0.00039	-0.00015
105.12	-0.00018	0.000227	0.00017744		0.00031296	0.00044	-4.4e-05
105.36	-0.00019	-0.00032	-6.256e-05		-0.000117	0.00031	-0.00038
105.6	-5.6e-07	-8.3e-05	-0.00016256		-0.000287	0.00034	4.65e-05
105.84	0.000139	0.000197	4.744e-05		0.00023296	0.00061	6.48e-06
106.08	0.000569	0.000117	9.744e-05		2.96e-06	0.00013	-0.00041
106.32	0.000119	7.74e-05	-1.256e-05		2.96e-06	0.00013	-0.0003
106.56	0.000519	-0.00021	-7.256e-05		-7.04e-06	0.00027	-0.00029
106.8	-3.1e-05	0.000147	6.744e-05		-5.704e-05	0.00022	-0.00021
107.04	0.000149	5.74e-05	-9.256e-05		0.00019296	0.00018	-0.00031
107.28	0.000409	8.74e-05	0.00010744		0.00019296	0.00024	-9.4e-05
107.52	0.000109	-0.00015	0.00018744		-7.04e-06	0.00042	-0.0002
107.76	0.000129	0.000187	-8.256e-05		2.96e-06	0.00046	-0.00013
108	-7.1e-05	-8.3e-05	9.744e-05		-0.000287	0.00016	-3.5e-06
108.24	0.000169	5.74e-05	0.00017744		-0.000157	0.00047	-0.00018
108.48	0.000149	0.000197	4.744e-05		2.96e-06	0.00024	-0.0001
108.72	9.44e-06	0.000117	9.744e-05		-0.000237	0.00049	-5.4e-05
108.96	0.000169	-9.3e-05	-0.00013256		-0.000127	8.03e-05	-0.00012
109.2	0.000249	0.000127	0.00012744		-8.704e-05	0.0003	-0.00047
109.44	0.000299	0.000447	0.00016744		7.296e-05	0.00035	-1.4e-05
109.68	0.000169	-0.0001	-0.00016256		8.296e-05	0.00045	-8.4e-05
109.92	0.000329	-2.6e-06	-2.256e-05		0.00018296	0.00047	-0.00015
110.16	0.000219	1.74e-05	7.44e-06		-7.704e-05	0.00027	-0.00025
110.4	0.000269	0.000177	0.00020744		0.00049296	0.0003	-0.00033
110.64	0.000159	1.74e-05	0.00028744		-0.000127	0.00043	-0.00014
110.88	-0.00013	0.000227	-0.00021256		0.00021296	0.00013	-0.00022
111.12	0.000269	-0.00016	0.00022744		-0.000217	0.00049	-0.00017
111.36	0.000159	7.74e-05	0.00013744		-0.000327	0.00031	-1.4e-05
111.6	8.94e-05	0.000287	-0.00016256		-0.000117	0.00048	-0.00022
111.84	0.000139	-6.3e-05	3.744e-05		-8.704e-05	0.00061	-0.00019
112.08	2.94e-05	0.000347	0.00026744		-6.704e-05	0.00049	-0.00015
112.32	0.000129	0.000107	4.744e-05		-0.000647	0.00036	4.65e-05
112.56	0.000239	8.74e-05	6.744e-05		0.00010296	0.00045	0.000156
112.8	0.000139	0.000147	0.00018744		0.00015296	0.00032	1.65e-05
113.04	-0.00012	-6.3e-05	-7.256e-05		-0.000107	0.00039	-0.00018
113.28	0.000359	4.74e-05	2.744e-05		0.00026296	0.00032	-1.4e-05
113.52	0.000139	8.74e-05	5.744e-05		-0.000127	0.00026	-4.4e-05
113.76	0.000419	0.000107	9.744e-05		0.00012296	0.00031	-9.4e-05
114	0.000489	0.000137	0.00030744		-9.704e-05	0.0004	-0.00025
114.24	4.94e-05	9.74e-05	0.00011744		0.00038296	0.00031	-0.00018
114.48	-6.1e-05	1.74e-05	-6.256e-05		-0.000177	0.00024	-9.4e-05
114.72	0.000129	-9.3e-05	5.744e-05		0.00023296	0.00029	-0.00016
114.96	7.94e-05	-3.3e-05	-4.256e-05		-0.000107	0.00062	-1.4e-05
115.2	-4.1e-05	-3.3e-05	0.00018744		1.296e-05	0.00021	-0.00027
115.44	0.000169	-6.3e-05	0.00015744		1.296e-05	0.00045	-0.0003
115.68	8.94e-05	-0.00014	5.744e-05		-0.000337	0.00042	0.000136
115.92	1.94e-05	-6.3e-05	-0.00017256		8.296e-05	0.00044	-7.4e-05
116.16	0.000229	-0.00021	-4.256e-05		-7.704e-05	8.03e-05	-0.00018
116.4	0.000549	0.000247	7.744e-05		0.00016296	0.0005	-0.00013
116.64	0.000159	-1.3e-05	-0.00019256		-0.000147	0.00059	-0.00011
116.88	-3.1e-05	1.74e-05	0.00017744		7.296e-05	0.00036	-0.00022
117.12	-5.6e-07	0.000247	-3.256e-05		3.296e-05	0.00017	-0.00024
117.36	0.000359	1.74e-05	0.00017744		0.00035296	0.00014	-0.0003
117.6	4.94e-05	-0.0001	0.00021744		3.296e-05	0.0003	-8.4e-05
117.84	8.94e-05	-0.00014	0.00028744		2.96e-06	0.0003	6.48e-06
118.08	0.000109	-0.00018	0.00032744		-0.000157	0.00041	-0.00025
118.32	0.000639	0.000247	0.00010744		-5.704e-05	0.00019	-0.00027
118.56	0.000159	0.000157	0.00014744		-0.000137	0.0003	-0.0002
118.8	2.94e-05	2.74e-05	-0.00010256		1.296e-05	0.00027	-0.0002
119.04	0.000599	0.000177	0.00011744		9.296e-05	0.00025	-0.00037
119.28	-0.00016	6.74e-05	-3.256e-05		-0.000107	0.00029	-0.00049
119.52	0.000189	1.74e-05	6.744e-05		8.296e-05	0.00015	-0.00043
119.76	0.000269	-3.3e-05	0.00034744		-0.000207	0.00034	-0.00041
120	0.0134334	0.003767	0.012897	0.004003	-0.00144825	-0.00160264	-0.000321029	-0.00118056
120.24	0.0134123	0.003907	0.013187	0.004226	-0.0013441	-0.00164154	-0.000645848	-0.00146565
120.48	0.0139788	0.004042	0.013008	0.003796	-0.00141	-0.00147151	-0.000490198	-0.00117519
120.72	0.0139247	0.004051	0.013083	0.004209	-0.00179367	-0.00172152	-0.00036566	-0.00128657
120.96	0.0136354	0.004125	0.013003	0.004086	-0.000919632	-0.00172534	-0.000540322	-0.00164329
121.2	0.0136415	0.003917	0.012717	0.003761	-0.00175323	-0.00183248	-0.000620008	-0.00103916
121.44	0.0140029	0.003458	0.013107	0.004028	-0.00185543	-0.00140459	-0.000426942	-0.0017179
121.68	0.0137477	0.004027	0.012959	0.004077	-0.00184116	-0.00167771	-0.000575899	-0.00142537
121.92	0.0141317	0.003565	0.012836	0.004187	-0.00148613	-0.00174085	-0.000196925	-0.00175865
122.16	0.013614	0.003866	0.0131	0.003639	-0.00175571	-0.0016468	-0.000538092	-0.00143157
122.4	0.0138705	0.003828	0.012583	0.003663	-0.00158064	-0.00197659	-0.000689003	-0.00129781
122.64	0.0139734	0.003811	0.01303	0.003489	-0.00158832	-0.00180544	-0.000584218	-0.00139339
122.88	0.0137281	0.003838	0.012909	0.003807	-0.0015294	-0.00165184	-0.00069701	-0.00143226
123.12	0.0136857	0.003771	0.012962	0.004346	-0.00108998	-0.00188922	-0.000536618	-0.00142816
123.36	0.0137879	0.003875	0.0127	0.003629	-0.00150734	-0.00190762	-0.000723495	-0.00134236
123.6	0.013696	0.0038	0.01236	0.003917	-0.00153484	-0.00180371	-0.000433581	-0.00118321
123.84	0.0138743	0.003613	0.012848	0.003971	-0.00161422	-0.00196662	-0.000312584	-0.00100197
124.08	0.0137371	0.003495	0.012774	0.004351	-0.0015605	-0.00179858	-0.000116255	-0.00142539
124.32	0.0135715	0.003503	0.012707	0.004096	-0.00186187	-0.00193557	-0.000375108	-0.0016995
124.56	0.0140068	0.003614	0.012228	0.003648	-0.00186217	-0.00176258	-0.000472534	-0.00130355
124.8	0.0136141	0.003837	0.012898	0.004125	-0.00204905	-0.00179638	-0.0006229	-0.0015925
125.04	0.0136868	0.003735	0.012992	0.003359	-0.00139501	-0.00178534	-0.000750262	-0.000964619
125.28	0.0141679	0.003718	0.01296	0.003355	-0.00173562	-0.0019687	-0.000370079	-0.00158896
125.52	0.0140551	0.003697	0.012498	0.003989	-0.00166209	-0.00195566	-0.000484145	-0.00179941
125.76	0.0134932	0.003429	0.012599	0.003671	-0.00155613	-0.00168178	-0.000602686	-0.00127114
126	0.013942	0.003345	0.012735	0.003369	-0.00193573	-0.00193411	-0.000717784	-0.00169039
126.24	0.0135859	0.003768	0.012314	0.003582	-0.0018776	-0.00181412	-0.000717595	-0.00150856
126.48	0.0135121	0.003589	0.012854	0.004067	-0.00157888	-0.00176677	-0.000384371	-0.00143128
126.72	0.0137434	0.003332	0.012624	0.004035	-0.00169465	-0.00150598	-0.000557676	-0.00118371
126.96	0.0139001	0.003686	0.012622	0.003812	-0.00116044	-0.00204719	-0.000585816	-0.00126255
127.2	0.0136215	0.003665	0.012183	0.003832	-0.00151964	-0.00198679	-0.000499858	-0.00127562
127.44	0.0138028	0.003569	0.012704	0.003441	-0.0011472	-0.00158709	-0.000659759	-0.00116705
127.68	0.0138949	0.003587	0.012559	0.003814	-0.00135023	-0.00166184	-0.00054639	-0.00170813
127.92	0.0140549	0.00358	0.012676	0.003351	-0.0011075	-0.00162182	-0.000540043	-0.00165478
128.16	0.0135788	0.003528	0.012277	0.003804	-0.00143958	-0.00168729	-0.000387458	-0.00147768
128.4	0.0136086	0.003839	0.012283	0.003569	-0.00176299	-0.00176594	-0.000548685	-0.00166155
128.64	0.0137073	0.003533	0.012726	0.003699	-0.00147039	-0.00168837	-0.000427002	-0.00157683
128.88	0.0136446	0.003446	0.012146	0.003516	-0.00150356	-0.00197227	-0.000594859	-0.00142564
129.12	0.0136502	0.003575	0.012343	0.003534	-0.00182204	-0.00159088	-0.000477696	-0.00132526
129.36	0.0133156	0.00359	0.012064	0.003455	-0.0011516	-0.00177841	-0.000228363	-0.00160508
129.6	0.0138738	0.003631	0.012437	0.003856	-0.00156233	-0.00180575	-0.000420631	-0.00132878
129.84	0.0136554	0.003775	0.012221	0.003479	-0.00142431	-0.00152908	-0.000477311	-0.00128995
130.08	0.0132307	0.003121	0.012285	0.003665	-0.00168323	-0.00194445	-0.00074135	-0.00140743
130.32	0.0133452	0.003606	0.012642	0.003982	-0.00193413	-0.00166908	-0.000797241	-0.00102897
130.56	0.0137073	0.003542	0.012018	0.003347	-0.00144209	-0.00184138	-0.000585963	-0.00184462
130.8	0.0137893	0.002983	0.012202	0.003657	-0.00154573	-0.00201246	-0.000750173	-0.00153983
131.04	0.0136045	0.003412	0.012278	0.003557	-0.00141771	-0.0016525	-0.000493437	-0.00163235
131.28	0.0137688	0.003323	0.012116	0.003327	-0.00190346	-0.00183086	-0.000294437	-0.00119763
131.52	0.0135953	0.003389	0.0121	0.002983	-0.00137786	-0.0020275	-0.000648288	-0.00116595
131.76	0.0138904	0.003404	0.011984	0.003328	-0.00154828	-0.00189986	-0.000698151	-0.00181953
132	0.0136826	0.003259	0.01204	0.003234	-0.00150789	-0.0018242	-0.0007052	-0.00160751
132.24	0.0136353	0.003543	0.011881	0.003638	-0.00164989	-0.0019136	-0.000368414	-0.00163842
132.48	0.0132657	0.00324	0.012246	0.003388	-0.00179075	-0.00204093	-0.000734654	-0.00140666
132.72	0.013574	0.003062	0.012063	0.003053	-0.00152715	-0.00187674	-0.000670218	-0.00155094
132.96	0.0137868	0.00321	0.012134	0.003427	-0.00150727	-0.00216456	-0.000599156	-0.00180934
133.2	0.0135438	0.003519	0.011873	0.00344	-0.00161142	-0.00194886	-0.000464072	-0.00154618
133.44	0.0138039	0.003174	0.012114	0.003156	-0.00178093	-0.00176987	-0.000595088	-0.00130495
133.68	0.0133353	0.003452	0.012046	0.003383	-0.00141582	-0.00168981	-0.000670115	-0.00123022
133.92	0.0134624	0.003512	0.012277	0.00346	-0.00152786	-0.00194626	-0.000552893	-0.00134543
134.16	0.0134768	0.003254	0.012081	0.003742	-0.00153312	-0.00205497	-0.000520519	-0.0013234
134.4	0.0132567	0.003454	0.011855	0.003341	-0.0017783	-0.00225983	-0.000675926	-0.00134543
134.64	0.013728	0.003288	0.011747	0.003689	-0.00149001	-0.00206512	-0.000259533	-0.00127601
134.88	0.0133544	0.003247	0.011804	0.003282	-0.00148805	-0.00186117	-0.000761461	-0.00165806
135.12	0.0132572	0.003093	0.011962	0.003847	-0.00150766	-0.00212795	-0.000544977	-0.00123224
135.36	0.0137018	0.0033	0.011913	0.003387	-0.00228054	-0.00219418	-0.000369087	-0.00144313
135.6	0.013627	0.003268	0.01181	0.003671	-0.00145936	-0.00176877	-0.000935609	-0.00130326
135.84	0.0135358	0.003378	0.012059	0.003492	-0.00186207	-0.00199239	-0.000680677	-0.00141678
136.08	0.0133531	0.003511	0.011582	0.003174	-0.00226096	-0.00212102	-0.000921644	-0.00149749
136.32	0.0136101	0.003495	0.011746	0.00318	-0.00171057	-0.00178155	-0.000560046	-0.00153243
136.56	0.0137011	0.00317	0.011727	0.003347	-0.00137979	-0.00193742	-0.00066024	-0.00169031
136.8	0.0133735	0.003273	0.011999	0.003029	-0.00184474	-0.00182957	-0.000535223	-0.00142413
137.04	0.0131352	0.003239	0.011777	0.003224	-0.00188988	-0.00206628	-0.00018513	-0.00186326
137.28	0.013634	0.003107	0.011898	0.00275	-0.00157349	-0.00159367	-0.000608052	-0.00141856
137.52	0.0133472	0.003014	0.011439	0.003053	-0.00172178	-0.00182731	-0.000853358	-0.00151198
137.76	0.013365	0.003164	0.011414	0.002932	-0.00180871	-0.00188757	-0.000812171	-0.0013375
138	0.0134944	0.003039	0.011884	0.003445	-0.00174693	-0.00182583	-0.000623427	-0.00135162
138.24	0.0133289	0.003059	0.011415	0.003388	-0.00120031	-0.00201232	-0.000843456	-0.00151739
138.48	0.0136665	0.003293	0.0115	0.003525	-0.00200229	-0.00207981	-0.000479055	-0.00125402
138.72	0.0133113	0.002995	0.011851	0.00317	-0.00197594	-0.00179673	-0.000885862	-0.0019137
138.96	0.013379	0.003258	0.011638	0.003245	-0.00206446	-0.00182555	-0.000679691	-0.00140342
139.2	0.0130004	0.00328	0.011992	0.003001	-0.00162253	-0.0019243	-0.00038049	-0.00168314
139.44	0.0130983	0.00293	0.011315	0.003204	-0.00131561	-0.00186432	-0.000678551	-0.00131934
139.68	0.0131604	0.003207	0.011692	0.003457	-0.00178961	-0.00188131	-0.000531835	-0.0017158
139.92	0.0132077	0.003232	0.011378	0.003101	-0.00148657	-0.00216658	-0.000681287	-0.0011873
140.16	0.0133586	0.003152	0.011881	0.003559	-0.00192345	-0.00233508	-0.000448084	-0.00143662
140.4	0.0133224	0.002983	0.011973	0.003287	-0.00187708	-0.00181102	-0.000634881	-0.00151727
140.64	0.013353	0.003025	0.011347	0.003148	-0.00178326	-0.00201445	-0.000750102	-0.00137785
140.88	0.012661	0.002758	0.011543	0.002757	-0.00214616	-0.00210047	-0.000645419	-0.00157698
141.12	0.0134919	0.003169	0.011521	0.003164	-0.00155091	-0.00207646	-0.000739612	-0.00149957
141.36	0.013835	0.003098	0.01185	0.00315	-0.00171504	-0.00198694	-0.000311882	-0.00147466
141.6	0.0130441	0.002895	0.011514	0.002754	-0.00204682	-0.0018475	-0.000517127	-0.00165775
141.84	0.0132746	0.002949	0.011356	0.002933	-0.00179853	-0.00194184	-0.000892484	-0.00178525
142.08	0.0132538	0.002805	0.011687	0.003207	-0.00201179	-0.00192393	-0.000790962	-0.00164075
142.32	0.0130648	0.00293	0.011386	0.00285	-0.00214905	-0.00199464	-0.000737682	-0.00175521
142.56	0.0132836	0.003024	0.011496	0.002846	-0.00183261	-0.00206684	-0.000605598	-0.00175006
142.8	0.0131527	0.002988	0.011228	0.003096	-0.00221832	-0.00204284	-0.000823831	-0.00187756
143.04	0.0130823	0.003315	0.011128	0.002909	-0.00148004	-0.00198993	-0.000427533	-0.00185963
143.28	0.0132635	0.003033	0.011723	0.002809	-0.00192692	-0.00209639	-0.000865149	-0.00138343
143.52	0.0133116	0.003053	0.011063	0.003312	-0.00183409	-0.00239252	-0.000736745	-0.00125414
143.76	0.0129302	0.003049	0.010791	0.00267	-0.00164127	-0.00223595	-0.000596137	-0.00180595
144	0.0135367	0.002966	0.011441	0.003087	-0.00199856	-0.00186357	-0.000694552	-0.00165685
144.24	0.0127525	0.002984	0.011295	0.002631	-0.00204434	-0.0021234	-0.00080932	-0.00169297
144.48	0.0130568	0.002946	0.01149	0.002797	-0.00184744	-0.00221376	-0.00066425	-0.00162703
144.72	0.0132788	0.003243	0.01165	0.002581	-0.00174613	-0.00213054	-0.000537937	-0.00146745
144.96	0.0131275	0.003067	0.011474	0.002986	-0.00150359	-0.0021013	-0.000398639	-0.0014188
145.2	0.0132547	0.002995	0.011257	0.002971	-0.00156679	-0.00198731	-0.000518639	-0.00151682
145.44	0.0133457	0.002829	0.011257	0.003191	-0.00219953	-0.00201698	-0.000532259	-0.00173721
145.68	0.0129381	0.00297	0.010968	0.002927	-0.00201613	-0.00191133	-0.00084945	-0.00149667
145.92	0.0132662	0.003139	0.011307	0.002739	-0.00185243	-0.00215609	-0.000771202	-0.00178679
146.16	0.0129051	0.003053	0.011197	0.002879	-0.00136041	-0.00186389	-0.000518638	-0.00157099
146.4	0.013258	0.002822	0.011237	0.002708	-0.00206805	-0.00177665	-0.000754288	-0.00134184
146.64	0.012912	0.002847	0.011058	0.002939	-0.00154297	-0.00223385	-0.000721596	-0.00176245
146.88	0.0134822	0.002762	0.010428	0.002576	-0.00228088	-0.00213384	-0.0007137	-0.00172595
147.12	0.0131551	0.002732	0.011139	0.002672	-0.00215681	-0.00212046	-0.000772934	-0.00168681
147.36	0.0132299	0.002661	0.011406	0.003016	-0.00192223	-0.00215662	-0.000681911	-0.00161049
147.6	0.0131091	0.0028	0.010992	0.003309	-0.00202882	-0.00219279	-0.000755005	-0.0017562
147.84	0.0135763	0.002934	0.011263	0.002747	-0.00175995	-0.00210912	-0.0004656	-0.0016053
148.08	0.013416	0.003024	0.010922	0.002612	-0.00194583	-0.00216881	-0.000955073	-0.00191427
148.32	0.0131274	0.002581	0.010958	0.003089	-0.00190001	-0.00217672	-0.000650112	-0.00171295
148.56	0.013454	0.002923	0.011092	0.0026	-0.00202863	-0.00214153	-0.00065194	-0.00169126
148.8	0.0133331	0.002568	0.010901	0.002956	-0.0019303	-0.00210563	-0.000683147	-0.00170335
149.04	0.0130518	0.00249	0.011025	0.003083	-0.00156018	-0.00201596	-0.000671466	-0.00141847
149.28	0.0134092	0.002602	0.011089	0.002866	-0.00205229	-0.00198374	-0.00100903	-0.00181375
149.52	0.0130934	0.002713	0.011016	0.002941	-0.00131303	-0.0025273	-0.000769502	-0.00165646
149.76	0.0134348	0.002726	0.01064	0.002447	-0.00202556	-0.00215005	-0.000484135	-0.00167165
150	0.0132889	0.002764	0.010607	0.002757	-0.00208807	-0.00246076	-0.000583666	-0.00191241
150.24	0.0132487	0.002769	0.010647	0.002507	-0.00253872	-0.00216745	-0.000912287	-0.00180365
150.48	0.0129332	0.002871	0.011022	0.003186	-0.00196329	-0.00210731	-0.00104446	-0.0014192
150.72	0.013486	0.003031	0.011048	0.002698	-0.00206489	-0.00189897	-0.000893212	-0.00116807
150.96	0.0133052	0.003326	0.011254	0.003057	-0.00191236	-0.00204247	-9.93356e-05	-0.00131974
151.2	0.0135864	0.003432	0.010775	0.003651	-0.00168499	-0.00198599	-0.000731323	-0.00126606
151.44	0.0128322	0.003832	0.011216	0.003228	-0.00187889	-0.0018409	-0.000506039	-0.00130282
151.68	0.0133692	0.003793	0.011116	0.003858	-0.00175572	-0.00163988	-0.000571368	-0.0011317
151.92	0.0136274	0.003644	0.011188	0.003951	-0.00105513	-0.00140362	-0.000325472	-0.000724636
152.16	0.0137914	0.004215	0.011483	0.003951	-0.001055	-0.0012572	7.74322e-05	-0.000324939
152.4	0.0139036	0.003895	0.011541	0.004188	-0.000861186	-0.00148264	-0.000216133	-5.03123e-05
152.64	0.0139966	0.004628	0.011936	0.004184	-0.001279	-0.000947254	-0.000477738	0.00019923
152.88	0.0137092	0.004778	0.012056	0.004361	-0.000704313	-0.0009918	7.08553e-05	4.25496e-05
153.12	0.0138401	0.004863	0.011912	0.00478	-0.000458511	-0.000912973	-9.10705e-05	0.000197408
153.36	0.0143459	0.005013	0.012199	0.004993	-0.000600887	-0.000766753	-0.000252282	0.000629151
153.6	0.0142258	0.004997	0.0125	0.005327	-0.000177646	-0.000467361	0.000149892	0.00079206
153.84	0.0148784	0.005315	0.012501	0.005658	-6.21706e-05	-0.000231917	0.000362655	0.000562324
154.08	0.0144326	0.005712	0.012459	0.005907	0.000320692	-0.000553154	0.000188199	0.000800737
154.32	0.0143469	0.005611	0.012796	0.00547	0.000751633	-0.000243058	0.000193164	0.00099711
154.56	0.014249	0.005827	0.012745	0.006109	0.000284092	-0.000218112	0.00041714	0.00162979
154.8	0.0151081	0.00592	0.013026	0.006116	0.000508595	-0.00020919	0.000117477	0.00153399
155.04	0.015501	0.005651	0.013213	0.00643	0.000694658	0.000201277	0.000396329	0.0018728
155.28	0.0146988	0.006386	0.012986	0.00653	0.000624624	0.000301824	0.000751949	0.00156474
155.52	0.0155079	0.006285	0.013039	0.006686	0.00101393	0.000143488	0.000963023	0.00205922
155.76	0.015446	0.006365	0.013013	0.006856	0.00109128	0.000148743	0.000598306	0.00200895
156	0.0152974	0.006482	0.01335	0.006447	0.000671113	0.000656374	0.000986815	0.00217772
156.24	0.0149766	0.006465	0.013637	0.007004	0.00115895	0.000597008	0.000976541	0.00231601
156.48	0.0157877	0.006729	0.013078	0.006664	0.00154879	0.000673008	0.000803827	0.00232508
156.72	0.015371	0.006741	0.013509	0.007202	0.00121197	0.000886969	0.00140788	0.00246281
156.96	0.015568	0.006381	0.013843	0.007061	0.0013499	0.000866082	0.00121612	0.00220133
157.2	0.016095	0.006934	0.013012	0.006994	0.00152621	0.001184	0.00124312	0.00296486
157.44	0.0154743	0.007096	0.012889	0.007246	0.0018826	0.00101212	0.00090023	0.00259343
157.68	0.0159343	0.006769	0.013806	0.007835	0.00176652	0.000953626	0.00138175	0.00280563
157.92	0.0158082	0.007197	0.013837	0.007318	0.00182106	0.0012724	0.00137631	0.0031809
158.16	0.0162544	0.006962	0.013603	0.007931	0.00163204	0.00139712	0.00127493	0.00295689
158.4	0.0159111	0.006954	0.013854	0.00747	0.00218801	0.00120395	0.00109973	0.0032827
158.64	0.0160887	0.007262	0.013935	0.007337	0.00193714	0.00171018	0.00133746	0.00309875
158.88	0.0163123	0.007326	0.01407	0.007946	0.00191811	0.00127308	0.00168487	0.0031357
159.12	0.0162674	0.007284	0.013983	0.008205	0.002316	0.00136422	0.00185387	0.00379032
159.36	0.0160683	0.007349	0.013705	0.008228	0.00242513	0.00165607	0.00167863	0.00363021
159.6	0.0163265	0.007469	0.013926	0.008066	0.00259431	0.0016695	0.00154175	0.00341393
159.84	0.0165898	0.007358	0.013982	0.008585	0.00223312	0.00177967	0.00161232	0.00401123
160.08	0.0164099	0.007422	0.01421	0.008246	0.00192642	0.00162491	0.00193934	0.00398041
160.32	0.0161954	0.007915	0.013849	0.0083	0.00270976	0.00167152	0.00205469	0.0038801
160.56	0.0165337	0.008033	0.014038	0.00826	0.00270232	0.00179918	0.00208981	0.00412598
160.8	0.0168128	0.007699	0.014048	0.008578	0.00267528	0.00184589	0.00187874	0.00422507
161.04	0.0163012	0.007831	0.014276	0.00874	0.0026109	0.0019768	0.00203139	0.00395866
161.28	0.0168919	0.007856	0.014122	0.008735	0.0026432	0.00214835	0.00201875	0.00432874
161.52	0.0168457	0.007785	0.014353	0.008785	0.00273225	0.00202871	0.00189829	0.00413994
161.76	0.0164243	0.00788	0.013983	0.008782	0.00316339	0.00202116	0.00200551	0.00444458
162	0.0161951	0.007766	0.013966	0.008609	0.00291968	0.00203804	0.00210613	0.0043979
162.24	0.0166824	0.007745	0.014388	0.00898	0.00323407	0.00212086	0.00244806	0.00404336
162.48	0.0167399	0.007724	0.01425	0.008786	0.00343109	0.002085	0.0022461	0.00430521
162.72	0.01697	0.007858	0.014108	0.008542	0.00329824	0.00227439	0.00193802	0.00411521
162.96	0.017051	0.007988	0.0142	0.008908	0.0034937	0.00243272	0.00231067	0.00478656
163.2	0.0166868	0.00797	0.014556	0.008712	0.00312693	0.00234393	0.00279156	0.00453179
163.44	0.0171832	0.007902	0.014195	0.008799	0.00334489	0.00248229	0.00235062	0.00420993
163.68	0.0167941	0.007921	0.014	0.009243	0.00343011	0.00249322	0.00233263	0.00487457
163.92	0.0170878	0.008234	0.013674	0.009113	0.00393184	0.00255945	0.00246189	0.00462012
164.16	0.0169425	0.008258	0.014613	0.009372	0.00311123	0.00252777	0.00230711	0.00496617
164.4	0.0172836	0.008431	0.014124	0.008641	0.00391815	0.00252157	0.00227126	0.00486308
164.64	0.0172805	0.00804	0.014641	0.00952	0.0035613	0.00243593	0.00254807	0.00518599
164.88	0.0173183	0.00832	0.014145	0.009578	0.00383258	0.00250373	0.00221873	0.00466574
165.12	0.0173624	0.008349	0.01448	0.009324	0.00354241	0.00246662	0.00250532	0.00469013
165.36	0.0180442	0.008396	0.014352	0.009343	0.00368038	0.00273624	0.00256169	0.0052799
165.6	0.0167934	0.0083	0.014208	0.008827	0.00374187	0.00276338	0.00273787	0.00489466
165.84	0.0177487	0.00829	0.014439	0.009209	0.0033957	0.00252933	0.00244414	0.00492887
166.08	0.0171852	0.008107	0.014447	0.009231	0.00416523	0.00260507	0.00231381	0.00513217
166.32	0.0174808	0.008483	0.014411	0.009252	0.00343122	0.00306496	0.00258455	0.00544213
166.56	0.0173738	0.008192	0.014259	0.009524	0.00372484	0.00303235	0.00262775	0.00560399
166.8	0.0173112	0.008468	0.014164	0.009347	0.00377972	0.00289724	0.00245414	0.00545273
167.04	0.0174368	0.008306	0.014251	0.009408	0.00397688	0.00284829	0.00259412	0.00537642
167.28	0.017815	0.008666	0.014279	0.009618	0.00370472	0.00307301	0.0026046	0.00523214
167.52	0.0175247	0.008466	0.014275	0.009638	0.00363436	0.00305428	0.00237447	0.00533973
167.76	0.017471	0.00861	0.013968	0.009118	0.003815	0.00304768	0.0024104	0.00552234
168	0.0176277	0.008571	0.013964	0.009748	0.00353812	0.00308276	0.00301778	0.00529766
168.24	0.0177003	0.00875	0.014252	0.009752	0.00440795	0.00317642	0.0025811	0.00540899
168.48	0.0176976	0.008461	0.014169	0.009679	0.00434074	0.00313726	0.00262287	0.00559075
168.72	0.0179169	0.008528	0.014219	0.009601	0.00387689	0.00285217	0.00276	0.00548297
168.96	0.0175098	0.008484	0.014499	0.009331	0.00395286	0.00320523	0.00290849	0.00544362
169.2	0.0176909	0.008558	0.013899	0.009866	0.00391822	0.00333493	0.00310323	0.00564185
169.44	0.017913	0.008619	0.014007	0.009362	0.00411866	0.00313814	0.00266081	0.00550253
169.68	0.0177862	0.008702	0.014141	0.009294	0.0043423	0.0032141	0.00271431	0.00566803
169.92	0.0179331	0.008444	0.014181	0.009464	0.00450568	0.00313874	0.00299686	0.00600141
170.16	0.0181837	0.008624	0.014342	0.010274	0.00439639	0.00320686	0.00254323	0.00564561
170.4	0.0176317	0.008761	0.014023	0.010126	0.00446378	0.00318507	0.00245714	0.00599771
170.64	0.0176379	0.008743	0.014239	0.010044	0.00415687	0.00300188	0.00305557	0.00579592
170.88	0.0179009	0.008431	0.014147	0.009818	0.0037625	0.0031041	0.00250033	0.00557729
171.12	0.0181601	0.008917	0.014411	0.00989	0.00457637	0.00306253	0.00296983	0.00622477
171.36	0.0178299	0.008794	0.013862	0.009737	0.00427444	0.00354646	0.00267667	0.0058699
171.6	0.0178501	0.008804	0.014221	0.009626	0.00442263	0.00346755	0.00286967	0.00613981
171.84	0.0179743	0.008666	0.013791	0.010047	0.00410807	0.00335242	0.00314054	0.0062103
172.08	0.0180306	0.008619	0.014258	0.009887	0.00430761	0.00360536	0.00303954	0.00579836
172.32	0.0178372	0.008769	0.014479	0.009963	0.00407944	0.00343762	0.00284182	0.00562636
172.56	0.0181189	0.008778	0.014601	0.009745	0.0046461	0.00334923	0.00299175	0.00603167
172.8	0.0178411	0.008778	0.014092	0.009984	0.00442413	0.00307536	0.00323372	0.00635344
173.04	0.0182446	0.008944	0.014401	0.010042	0.00436506	0.00323385	0.00303179	0.00609478
173.28	0.0175848	0.008862	0.013821	0.01004	0.00460406	0.00327265	0.00316906	0.00597075
173.52	0.0179631	0.008822	0.014191	0.009774	0.00465979	0.00328301	0.0030494	0.00606352
173.76	0.0177594	0.008549	0.014195	0.010184	0.00431914	0.0035442	0.00318397	0.00614711
174	0.0178875	0.008775	0.013986	0.01037	0.0048416	0.00372559	0.00300445	0.00621375
174.24	0.0184709	0.008775	0.014149	0.009998	0.00463843	0.00345379	0.00309148	0.00597573
174.48	0.0182816	0.008861	0.014231	0.009868	0.00468172	0.0036523	0.0031589	0.00623901
174.72	0.0177133	0.00878	0.014517	0.010155	0.00464804	0.00396835	0.00322318	0.00657155
174.96	0.0182199	0.009248	0.014134	0.009947	0.00526157	0.0035099	0.00297473	0.00630092
175.2	0.0179163	0.009021	0.013976	0.01055	0.00500122	0.00344178	0.00331311	0.00634382
175.44	0.0177978	0.008501	0.014064	0.009922	0.00527753	0.00366841	0.00314917	0.00604954
175.68	0.0179845	0.009081	0.013699	0.010134	0.00440851	0.00350681	0.00353208	0.00640974
175.92	0.0180681	0.009074	0.013765	0.010565	0.00468418	0.00363087	0.00319908	0.0063673
176.16	0.0180496	0.008704	0.014117	0.010409	0.00503452	0.00391459	0.00309834	0.0065238
176.4	0.0176748	0.00888	0.014313	0.010172	0.00496406	0.0040092	0.00316616	0.00649542
176.64	0.0183541	0.009152	0.014334	0.01038	0.00474707	0.00373334	0.0032973	0.00623008
176.88	0.0180734	0.00904	0.014116	0.010444	0.00449106	0.0034581	0.00326686	0.00674791
177.12	0.0186483	0.008837	0.013909	0.010086	0.00468369	0.00395422	0.00334123	0.00637945
177.36	0.018055	0.009015	0.014166	0.010163	0.00484507	0.00367511	0.00328245	0.00634813
177.6	0.0183778	0.0092	0.014225	0.010501	0.0048959	0.00378882	0.00328978	0.00660243
177.84	0.0179144	0.00894	0.014041	0.010667	0.00507525	0.00370962	0.00335414	0.00691487
178.08	0.0181817	0.009057	0.013949	0.010371	0.00436644	0.00370456	0.00333227	0.00615037
178.32	0.0185792	0.0091	0.014201	0.01042	0.00479161	0.00381188	0.00346507	0.0066066
178.56	0.0180669	0.008779	0.013901	0.010057	0.00481536	0.00389855	0.00334732	0.00620959
178.8	0.0186465	0.009037	0.013721	0.01016	0.00519752	0.0038496	0.00310832	0.00663309
179.04	0.0181267	0.009397	0.013803	0.010774	0.00473988	0.00340267	0.00323831	0.00662625
179.28	0.0178917	0.008869	0.013533	0.010836	0.00471536	0.0038069	0.00344821	0.0066787
179.52	0.0180521	0.00911	0.014261	0.010665	0.00483201	0.00402394	0.00318873	0.00657443
179.76	0.0185462	0.009178	0.013973	0.010447	0.00470487	0.00379088	0.00350437	0.00667855
180	0.0184786	0.008952	0.014159	0.010227	0.00483269	0.00392705	0.00362679	0.00663505
180.24	0.0189221	0.008796	0.013892	0.010517	0.00507719	0.00398891	0.003523	0.00646188
180.48	0.0183285	0.009042	0.013818	0.010354	0.00541429	0.00369359	0.00349747	0.00644455
180.72	0.018051	0.008865	0.014022	0.01067	0.00526292	0.0040214	0.0035088	0.00690796
180.96	0.0182664	0.00881	0.013823	0.010229	0.00487083	0.00384694	0.00394106	0.00705108
181.2	0.01842	0.008891	0.013847	0.010271	0.00553973	0.00373504	0.00341717	0.00661232
181.44	0.0181829	0.009112	0.013867	0.010459	0.00513058	0.00411847	0.00356982	0.00687517
181.68	0.0189094	0.009021	0.013817	0.010388	0.00533139	0.0040412	0.00342994	0.0067111
181.92	0.0185358	0.008757	0.013901	0.010526	0.00536336	0.00392693	0.0032052	0.00686829
182.16	0.0180353	0.008876	0.013823	0.010384	0.00560732	0.00384546	0.00335331	0.00660339
182.4	0.0179712	0.008926	0.014043	0.010671	0.00525186	0.0036384	0.00332521	0.00707025
182.64	0.0183773	0.008873	0.013456	0.010576	0.00519595	0.00395685	0.00354496	0.00681652
182.88	0.018104	0.009201	0.013763	0.010679	0.00537079	0.00422475	0.0037729	0.00694593
183.12	0.0185087	0.008769	0.014137	0.010473	0.00516943	0.00388409	0.00331124	0.00688204
183.36	0.0180145	0.008888	0.013698	0.010377	0.00541574	0.00355584	0.00349923	0.00685791
183.6	0.018496	0.00909	0.01408	0.010637	0.00501358	0.00421458	0.00351075	0.00692522
183.84	0.018616	0.008893	0.013565	0.01044	0.0053652	0.00397143	0.00365313	0.00663086
184.08	0.0184403	0.009116	0.013901	0.011025	0.00523288	0.00376807	0.00347036	0.00689326
184.32	0.0186666	0.009004	0.013819	0.010662	0.00486995	0.0038131	0.00364004	0.0071265
184.56	0.0183282	0.008833	0.013842	0.01045	0.00520244	0.0038312	0.003587	0.00665068
184.8	0.0184862	0.00836	0.013671	0.010787	0.00536566	0.00409916	0.00359277	0.00721539
185.04	0.0183211	0.009163	0.013908	0.010778	0.00524355	0.00419034	0.00349821	0.00743092
185.28	0.0186305	0.008967	0.013579	0.01086	0.0050942	0.00421017	0.00389648	0.00699602
185.52	0.0186856	0.009112	0.013684	0.010774	0.00517601	0.00415387	0.00342151	0.00705906
185.76	0.0182667	0.009129	0.013764	0.010673	0.00541285	0.00411496	0.00353925	0.0068172
186	0.0187173	0.009156	0.013908	0.010447	0.00520124	0.00420591	0.00351588	0.00666328
186.24	0.0184866	0.00914	0.013522	0.010801	0.00529694	0.00390796	0.00319788	0.00709376
186.48	0.0187922	0.009354	0.013748	0.011062	0.00525722	0.0042962	0.00381493	0.00715513
186.72	0.0183611	0.008937	0.013905	0.010386	0.00527889	0.00399519	0.00389791	0.00729955
186.96	0.0186441	0.00947	0.013448	0.010939	0.00514607	0.00390983	0.00364751	0.00729961
187.2	0.0184441	0.008482	0.013541	0.010722	0.00533503	0.00387729	0.0033472	0.00691399
187.44	0.0185064	0.009216	0.013697	0.010966	0.00522903	0.00382771	0.00387817	0.00725311
187.68	0.0187243	0.009203	0.013326	0.010738	0.0053196	0.0042278	0.00348572	0.00716407
187.92	0.0188031	0.00884	0.013675	0.010228	0.00527057	0.00410213	0.003529	0.00685172
188.16	0.018865	0.008914	0.013972	0.010528	0.00583998	0.00407244	0.00355804	0.00691571
188.4	0.0185831	0.008845	0.013702	0.010564	0.00555999	0.00380795	0.00352951	0.00734995
188.64	0.0180855	0.009201	0.013751	0.010784	0.00538467	0.00384799	0.00359555	0.00708715
188.88	0.0185088	0.00887	0.01348	0.010904	0.00517188	0.00415797	0.00355951	0.00708447
189.12	0.0183895	0.008774	0.013523	0.01078	0.00491322	0.00374358	0.00365087	0.00726523
189.36	0.0180718	0.009152	0.013662	0.010697	0.00553561	0.00399622	0.00355895	0.00676004
189.6	0.0185139	0.009012	0.013706	0.010643	0.00586343	0.00410887	0.0037676	0.00712187
189.84	0.0186087	0.009226	0.013689	0.010929	0.00585645	0.00407613	0.0035133	0.00741878
190.08	0.0187009	0.008997	0.013617	0.010455	0.00520582	0.00393719	0.00336813	0.00712768
190.32	0.017905	0.009064	0.013831	0.010975	0.00568917	0.00408918	0.00371489	0.0072342
190.56	0.0178931	0.009297	0.013411	0.010854	0.00503696	0.00421113	0.00368825	0.00751317
190.8	0.0186554	0.009069	0.013765	0.01041	0.00563915	0.0042887	0.00377023	0.0073489
191.04	0.0188405	0.008738	0.014138	0.010917	0.00563268	0.00405655	0.00387441	0.0072961
191.28	0.0185046	0.00913	0.013757	0.010407	0.00599897	0.00419329	0.00389485	0.00728238
191.52	0.0187609	0.009175	0.013757	0.010748	0.00581571	0.004278	0.00375243	0.00722675
191.76	0.0179923	0.008729	0.013952	0.010724	0.0055959	0.00433325	0.00386129	0.00710369
192	0.0185762	0.008747	0.013963	0.010757	0.00582568	0.00412547	0.00364044	0.00721095
192.24	0.0184087	0.008896	0.013527	0.010853	0.00546044	0.00410302	0.0034644	0.00743155
192.48	0.0183605	0.008997	0.013832	0.01106	0.00551985	0.00431396	0.00390663	0.0073778
192.72	0.0186698	0.009119	0.013812	0.010995	0.00545006	0.00407568	0.00393422	0.00737842
192.96	0.0184857	0.009039	0.013596	0.010895	0.00549157	0.00420245	0.0038595	0.00712192
193.2	0.0181361	0.008971	0.013637	0.011103	0.00577586	0.00393486	0.00387171	0.00730658
193.44	0.0188533	0.009057	0.01364	0.01063	0.00571086	0.00433569	0.00325167	0.00737251
193.68	0.0187851	0.008661	0.013441	0.010578	0.00579078	0.00419344	0.0037331	0.00710908
193.92	0.0182816	0.009028	0.013462	0.011129	0.00563518	0.0045186	0.00381617	0.00726515
194.16	0.0189293	0.008705	0.013595	0.010887	0.0056176	0.00415708	0.00375172	0.00720971
194.4	0.0188334	0.008848	0.013581	0.010589	0.0055127	0.00403396	0.00381567	0.00751126
194.64	0.018813	0.009008	0.013763	0.010805	0.005816	0.00430565	0.00407692	0.00734832
194.88	0.0188574	0.009175	0.013774	0.010552	0.00557007	0.0042956	0.00373224	0.00708123
195.12	0.0183989	0.008849	0.013746	0.010927	0.00581031	0.00445501	0.0039358	0.00774517
195.36	0.0187221	0.00876	0.013822	0.010677	0.00606526	0.00456004	0.00363141	0.00701981
195.6	0.0186123	0.009099	0.013616	0.01049	0.0057139	0.00437125	0.00356571	0.00742835
195.84	0.0186015	0.008825	0.01363	0.011058	0.00576973	0.00405267	0.00409446	0.00719871
196.08	0.0184136	0.009231	0.013528	0.0111	0.00531495	0.00416558	0.00388127	0.00716659
196.32	0.0186979	0.008712	0.013706	0.011023	0.00542955	0.00440137	0.00390732	0.00728701
196.56	0.0188405	0.009	0.01359	0.011084	0.00550603	0.00424974	0.00372717	0.00727564
196.8	0.0187464	0.008936	0.013769	0.011053	0.00529361	0.00429004	0.00409112	0.00737828
197.04	0.0183976	0.009184	0.013546	0.010905	0.00560427	0.00422157	0.00390973	0.00741156
197.28	0.0186816	0.00909	0.013334	0.011138	0.00597403	0.00428548	0.00374331	0.00719605
197.52	0.0186274	0.008904	0.013652	0.010981	0.00582797	0.00422145	0.00395043	0.00730567
197.76	0.0185123	0.009063	0.013653	0.010686	0.00617114	0.00411404	0.00367021	0.00768464
198	0.0184853	0.009101	0.013305	0.011031	0.00610321	0.00433055	0.0036701	0.00765031
198.24	0.0187141	0.008486	0.013148	0.010935	0.00611212	0.00377669	0.00396933	0.00728584
198.48	0.0189408	0.009024	0.013704	0.011139	0.00573696	0.00425338	0.00408555	0.00732453
198.72	0.0187877	0.009104	0.013128	0.010728	0.00561917	0.00411364	0.00380324	0.0072086
198.96	0.0186474	0.008989	0.01379	0.010494	0.00548916	0.00393565	0.00413422	0.00712498
199.2	0.0187685	0.008954	0.01359	0.011012	0.00603452	0.00433928	0.00391829	0.00754509
199.44	0.0191451	0.0089	0.013579	0.01051	0.00554709	0.00429102	0.00404552	0.00741259
199.68	0.0190746	0.008888	0.01339	0.010982	0.00595303	0.00407519	0.00429303	0.00753343
199.92	0.01872	0.00873	0.013634	0.010723	0.00607378	0.00454333	0.00405511	0.00782909
200.16	0.0184777	0.008911	0.013667	0.01106	0.00613361	0.00426914	0.00386441	0.00788203
200.4	0.0185103	0.009131	0.013221	0.011749	0.00609481	0.00393999	0.00431922	0.00783626
200.64	0.0188236	0.009089	0.013396	0.010336	0.00568093	0.0041282	0.00393447	0.00765466
200.88	0.0186648	0.008697	0.013197	0.01093	0.00578173	0.00430589	0.00408577	0.00765575
201.12	0.0187478	0.008934	0.013431	0.011437	0.00605971	0.00442459	0.00399303	0.00749317
201.36	0.0188496	0.009013	0.01337	0.010807	0.00571664	0.00422764	0.0042635	0.00791522
201.6	0.0188586	0.00923	0.013206	0.010576	0.00627583	0.0045485	0.00395868	0.00745046
201.84	0.0188002	0.008735	0.013294	0.011106	0.00588945	0.00441157	0.00380885	0.00755247
202.08	0.0184964	0.008951	0.013714	0.010747	0.00580272	0.00406736	0.00435458	0.0077001
202.32	0.019003	0.009218	0.013135	0.010874	0.00585498	0.00420505	0.00410689	0.00769909
202.56	0.0185411	0.008785	0.013288	0.010471	0.00565309	0.00475071	0.00442635	0.00771477
202.8	0.0185625	0.008876	0.013507	0.010649	0.00567461	0.00432534	0.00381478	0.00795499
203.04	0.0183767	0.008952	0.013315	0.010613	0.00603015	0.00446276	0.00406065	0.00741243
203.28	0.0186944	0.008819	0.013407	0.010679	0.00585531	0.00444551	0.00436241	0.00773265
203.52	0.0183353	0.009024	0.013281	0.011333	0.00577477	0.00419438	0.00399841	0.00782158
203.76	0.01876	0.009015	0.013632	0.011071	0.00637352	0.00398037	0.00403439	0.00799907
204	0.0188663	0.00913	0.013472	0.011073	0.00596098	0.00414554	0.00428525	0.00767833
204.24	0.0187428	0.009179	0.013529	0.010558	0.00618589	0.00418109	0.00386084	0.00777553
204.48	0.0189902	0.008936	0.013356	0.01119	0.00601526	0.00430272	0.00398078	0.00751403
204.72	0.0188041	0.008924	0.013702	0.010968	0.0061422	0.00434603	0.00410886	0.00784141
204.96	0.0184144	0.009079	0.013314	0.010737	0.00597771	0.00462159	0.0035302	0.00754795
205.2	0.0192311	0.008729	0.012928	0.011049	0.00630139	0.00422604	0.00392735	0.00801934
205.44	0.0189153	0.009242	0.013238	0.011052	0.00575675	0.0043316	0.00420909	0.00778782
205.68	0.0192969	0.008806	0.013292	0.010323	0.00581447	0.00437481	0.00375555	0.00814417
205.92	0.0186096	0.008764	0.013545	0.010647	0.0060098	0.00425763	0.00440327	0.00760838
206.16	0.0186124	0.009238	0.013018	0.010306	0.00635772	0.00430023	0.00390386	0.0072399
206.4	0.0184525	0.009135	0.013328	0.010965	0.00609864	0.00454339	0.00404219	0.00742186
206.64	0.0184744	0.008674	0.013501	0.010866	0.00575546	0.00437765	0.00402022	0.0076929
206.88	0.0186614	0.008751	0.013493	0.010595	0.00602725	0.00445078	0.00430923	0.00784419
207.12	0.0185434	0.008883	0.013556	0.010911	0.00615437	0.00427921	0.00358868	0.00765629
207.36	0.018731	0.008482	0.01352	0.01075	0.00595074	0.00418056	0.00384601	0.00778634
207.6	0.0189377	0.008775	0.013148	0.01086	0.00582315	0.00399714	0.00410524	0.00771806
207.84	0.0187177	0.008619	0.013218	0.010537	0.00593859	0.00424308	0.00454587	0.00803779
208.08	0.0181846	0.009191	0.013348	0.01079	0.0056025	0.00407418	0.004228	0.00760442
208.32	0.0187785	0.008953	0.013065	0.011075	0.00615623	0.00427157	0.00461879	0.00785226
208.56	0.0187236	0.009005	0.013201	0.010648	0.00577803	0.00420175	0.00396966	0.00771264
208.8	0.0188307	0.009084	0.013531	0.01064	0.00618412	0.00410948	0.00428065	0.00757276
209.04	0.0184284	0.008912	0.013252	0.011076	0.00625582	0.0045126	0.00394988	0.00767208
209.28	0.0186097	0.009041	0.013393	0.010605	0.00552312	0.00430762	0.00437654	0.00773019
209.52	0.0186802	0.009235	0.013234	0.010573	0.00624125	0.00432507	0.0038764	0.00787129
209.76	0.0187804	0.008683	0.012805	0.010965	0.00606144	0.00425735	0.00421402	0.00844829
210	0.0184734	0.008946	0.013393	0.01101	0.00626992	0.00425173	0.00384657	0.00785717
210.24	0.0190589	0.008921	0.01314	0.011089	0.00582954	0.00443116	0.00415506	0.00737286
210.48	0.0183824	0.009046	0.013063	0.010482	0.00623312	0.00420499	0.00423602	0.00770447
210.72	0.0185453	0.008848	0.01294	0.011042	0.00606977	0.00436795	0.00425844	0.0077837
210.96	0.0182328	0.00895	0.013192	0.010945	0.00580996	0.00427964	0.00393206	0.00801612
211.2	0.0186078	0.00891	0.013369	0.010773	0.00605418	0.0042492	0.00421589	0.00759396
211.44	0.0183235	0.009156	0.013635	0.010924	0.00594494	0.00414816	0.00436338	0.0078417
211.68	0.0190369	0.009166	0.013297	0.010899	0.00590842	0.0042234	0.00408615	0.00759827
211.92	0.0188533	0.009216	0.013407	0.010348	0.00572488	0.00481167	0.00433747	0.00761438
212.16	0.018977	0.009034	0.013294	0.011057	0.00608698	0.00439418	0.00419124	0.00805414
212.4	0.0188799	0.008471	0.013111	0.011214	0.00602855	0.0043285	0.00397158	0.00818303
212.64	0.0188621	0.009017	0.013359	0.010916	0.0059037	0.00436857	0.00405098	0.00828703
212.88	0.0189613	0.008499	0.013202	0.01081	0.00635581	0.00436007	0.00440541	0.00744098
213.12	0.0184578	0.009158	0.013676	0.010716	0.00627824	0.00455663	0.00427855	0.00771216
213.36	0.0186293	0.009221	0.013419	0.010556	0.0066794	0.00417667	0.00402283	0.00766543
213.6	0.0190238	0.00912	0.013292	0.010684	0.00601653	0.00429366	0.00434024	0.00777718
213.84	0.0189883	0.009016	0.013376	0.010809	0.00621233	0.00437575	0.0047118	0.00762069
214.08	0.0189729	0.00869	0.013349	0.010622	0.00623235	0.00408419	0.00421296	0.00813429
214.32	0.019221	0.008515	0.013158	0.010648	0.00576724	0.00432737	0.00435956	0.00775715
214.56	0.0188181	0.009119	0.013403	0.010925	0.00621436	0.00422765	0.00408661	0.00776886
214.8	0.0189331	0.008653	0.013231	0.010249	0.00579104	0.00451109	0.0044113	0.00788786
215.04	0.0184744	0.008834	0.013353	0.010528	0.00643224	0.00421735	0.00390031	0.00746009
215.28	0.0187308	0.008869	0.012882	0.011055	0.00620538	0.00437659	0.00412705	0.00758497
215.52	0.0187453	0.008836	0.013182	0.010791	0.00602531	0.0042492	0.00417584	0.00800627
215.76	0.0187483	0.008735	0.013306	0.010885	0.00620484	0.00463032	0.00408239	0.0081947
216	0.0187683	0.00875	0.013232	0.010879	0.00627977	0.00428711	0.0042923	0.00795504
216.24	0.0191525	0.008656	0.01317	0.010895	0.0061167	0.00416718	0.00400441	0.00772823
216.48	0.0190703	0.00835	0.013224	0.010661	0.00565024	0.00458267	0.00425677	0.00806096
216.72	0.0187439	0.008587	0.012635	0.010817	0.00616298	0.00435364	0.00445646	0.00787742
216.96	0.0191968	0.008901	0.013147	0.011123	0.00640463	0.00447107	0.00413014	0.00772428
217.2	0.0187024	0.008832	0.013326	0.010902	0.00615614	0.00450495	0.00440722	0.00829499
217.44	0.019193	0.008741	0.013224	0.010827	0.0061283	0.00426266	0.00418001	0.00776583
217.68	0.0186641	0.008928	0.013119	0.010589	0.00609954	0.00442001	0.00419041	0.00770486
217.92	0.01867	0.008891	0.013191	0.011266	0.00628063	0.00459266	0.004182	0.00780031
218.16	0.0188738	0.008606	0.013485	0.010504	0.00629679	0.0042886	0.00434796	0.00814184
218.4	0.018894	0.00877	0.013205	0.011036	0.00614143	0.00426196	0.00428393	0.00765418
218.64	0.0186568	0.008544	0.013113	0.01097	0.0056197	0.00435548	0.00403632	0.00748059
218.88	0.0185904	0.008624	0.013251	0.011061	0.00629766	0.00437775	0.00436599	0.00814306
219.12	0.0189499	0.00876	0.012975	0.010847	0.00588897	0.00448927	0.00433322	0.00770548
219.36	0.0187456	0.009011	0.013395	0.011129	0.00623288	0.00441226	0.00413509	0.00770288
219.6	0.0189617	0.008853	0.01307	0.01057	0.00586653	0.00428772	0.00437401	0.00766533
219.84	0.0187317	0.008681	0.012722	0.011085	0.00608915	0.00416318	0.00403713	0.00785295
220.08	0.0190317	0.00886	0.013189	0.011228	0.00621045	0.00429626	0.00406932	0.00810086
220.32	0.0190605	0.008548	0.013087	0.010961	0.0060929	0.00399057	0.00412166	0.00812407
220.56	0.0187438	0.008371	0.013209	0.010452	0.00628672	0.00446565	0.00454749	0.00759488
220.8	0.0185494	0.009106	0.013142	0.010778	0.00596731	0.00462052	0.00418189	0.00770552
221.04	0.0187181	0.008678	0.01295	0.010664	0.00590754	0.00433117	0.00433317	0.00800599
221.28	0.0188213	0.008939	0.013399	0.01033	0.00633564	0.00419261	0.00428114	0.0079147
221.52	0.0189913	0.008583	0.013392	0.010702	0.00654216	0.00446921	0.00409639	0.00818668
221.76	0.0190753	0.008625	0.013117	0.010657	0.006369	0.00421387	0.00380546	0.00800407
222	0.0187712	0.008725	0.013224	0.010861	0.00620543	0.00452428	0.00428339	0.00745914
222.24	0.0189663	0.008524	0.013112	0.010842	0.00630772	0.00439907	0.00407803	0.00804684
222.48	0.0189899	0.008599	0.013017	0.010867	0.00642881	0.00439616	0.00443133	0.00807598
222.72	0.0189098	0.008694	0.013144	0.010549	0.00625452	0.00415392	0.00450063	0.00822509
222.96	0.0189523	0.008711	0.012791	0.010704	0.00622061	0.00432149	0.00421045	0.00782593
223.2	0.0188613	0.008645	0.013074	0.010575	0.00650831	0.00443216	0.00439606	0.00841444
223.44	0.0189284	0.008823	0.012762	0.011362	0.00609263	0.00430054	0.00433208	0.00817225
223.68	0.018419	0.00887	0.013362	0.010703	0.00594949	0.00431782	0.00439369	0.00756491
223.92	0.019026	0.008556	0.012766	0.011214	0.00599199	0.00425498	0.00431295	0.00831247
224.16	0.0191171	0.008787	0.013094	0.010767	0.00655629	0.00439705	0.00387635	0.00786562
224.4	0.0190154	0.008617	0.013006	0.010735	0.00661434	0.00449085	0.00419389	0.00799149
224.64	0.0189174	0.008777	0.012926	0.010829	0.00615974	0.00456771	0.00438718	0.00804266
224.88	0.0189316	0.008669	0.01291	0.011289	0.00599899	0.00418984	0.00464609	0.00777549
225.12	0.0190264	0.00874	0.013063	0.010541	0.00567348	0.00431586	0.00466472	0.00811027
225.36	0.0189202	0.008541	0.013066	0.010833	0.00611433	0.00429789	0.00442122	0.00824593
225.6	0.0188582	0.008724	0.01298	0.011044	0.00577545	0.00453575	0.00473102	0.00782928
225.84	0.0188663	0.008535	0.012852	0.010422	0.00624092	0.00418694	0.00430376	0.00805664
226.08	0.0187031	0.008977	0.01279	0.010923	0.00690992	0.0043116	0.00395547	0.00813121
226.32	0.0186459	0.008812	0.012815	0.010699	0.00607012	0.00413083	0.00437351	0.00788628
226.56	0.019034	0.008282	0.013062	0.011161	0.00611977	0.00438208	0.00437498	0.00807217
226.8	0.0191117	0.008563	0.012881	0.010827	0.0063027	0.00429662	0.00429946	0.00816691
227.04	0.018807	0.008737	0.013314	0.01087	0.00692016	0.00432375	0.00418391	0.00795715
227.28	0.0189048	0.008933	0.013319	0.01081	0.00609392	0.00443098	0.00449162	0.00805848
227.52	0.0190226	0.008617	0.013112	0.011208	0.00571234	0.00417562	0.00453044	0.00816677
227.76	0.0186898	0.008685	0.013078	0.010707	0.00649752	0.00422159	0.00433752	0.00773568
228	0.0190305	0.008647	0.013004	0.01031	0.00622784	0.00432934	0.00429433	0.00806071
228.24	0.0188707	0.008549	0.012723	0.010766	0.00614545	0.00454549	0.00436506	0.00824727
228.48	0.0187529	0.008299	0.012824	0.010619	0.00627148	0.00419406	0.00444797	0.00801654
228.72	0.0189125	0.008881	0.01313	0.010826	0.00618424	0.00441202	0.00447588	0.00813805
228.96	0.01873	0.008313	0.013003	0.010809	0.00603855	0.00463288	0.00478436	0.00833504
229.2	0.0187995	0.0084	0.013062	0.010894	0.00591827	0.00444764	0.00444987	0.00831982
229.44	0.0188384	0.008772	0.012837	0.010767	0.00628606	0.00466689	0.00434585	0.00842408
229.68	0.018857	0.008503	0.012852	0.010583	0.00638959	0.00428378	0.00457814	0.00826791
229.92	0.0185609	0.008701	0.01317	0.010446	0.00663852	0.00438092	0.00431282	0.00828223
230.16	0.018787	0.008722	0.012874	0.010922	0.00663429	0.00423028	0.00447991	0.00805399
230.4	0.0191939	0.008512	0.013355	0.010496	0.00666388	0.00477126	0.00449809	0.00823595
230.64	0.0188218	0.008461	0.013169	0.010669	0.0065349	0.00431167	0.00446955	0.00822416
230.88	0.0188877	0.008682	0.012759	0.011256	0.00652888	0.00420631	0.00409666	0.0080003
231.12	0.0188011	0.00883	0.012917	0.010767	0.00616408	0.00418041	0.00432646	0.00806732
231.36	0.0193333	0.008501	0.013141	0.010932	0.00607569	0.00430295	0.00410886	0.00839387
231.6	0.0192282	0.008289	0.012938	0.010618	0.00588009	0.00438453	0.00429986	0.00780995
231.84	0.018475	0.008778	0.012754	0.010552	0.00631325	0.00443953	0.0042767	0.00813162
232.08	0.0185306	0.008422	0.012898	0.01058	0.00631596	0.00466356	0.00410271	0.00797126
232.32	0.0184855	0.008643	0.012885	0.010617	0.00615008	0.00441105	0.00448664	0.00841488
232.56	0.0191795	0.008545	0.013104	0.010758	0.00648324	0.00416607	0.00463097	0.00780714
232.8	0.0188471	0.008554	0.01295	0.010569	0.00622336	0.00427749	0.0045415	0.0085071
233.04	0.0189586	0.008455	0.012889	0.010741	0.0061819	0.00432321	0.00449262	0.00798998
233.28	0.0189812	0.008407	0.012776	0.010823	0.00644635	0.00438475	0.00442146	0.00792025
233.52	0.0187867	0.008552	0.012962	0.010214	0.00616898	0.00409938	0.00446111	0.00822912
233.76	0.0190797	0.008396	0.012922	0.01076	0.00648734	0.00414496	0.00453701	0.00822325
234	0.0187471	0.008614	0.012886	0.010502	0.00634057	0.00431034	0.00465578	0.00842429
234.24	0.0189583	0.008634	0.013006	0.010627	0.00635327	0.00466688	0.00425811	0.00802112
234.48	0.0192042	0.008486	0.013197	0.010466	0.00657672	0.00433344	0.0045966	0.00778408
234.72	0.0182024	0.008534	0.012748	0.010985	0.00622394	0.00407327	0.00457911	0.00804296
234.96	0.0188904	0.008205	0.012981	0.010471	0.00606281	0.00443231	0.00447703	0.00825518
235.2	0.0189255	0.008665	0.012647	0.01021	0.00632848	0.00427173	0.00442486	0.00761582
235.44	0.0190874	0.008446	0.012644	0.010935	0.0060401	0.00438949	0.00458438	0.0078744
235.68	0.0193387	0.008517	0.012703	0.010467	0.00673167	0.00406997	0.00471578	0.00825212
235.92	0.0189335	0.008236	0.01312	0.010388	0.00624928	0.00411392	0.0045171	0.00832041
236.16	0.0187016	0.008581	0.012801	0.010246	0.00602642	0.0046148	0.00460387	0.00797476
236.4	0.0191204	0.008182	0.012901	0.010993	0.00673047	0.00416601	0.00440103	0.00813716
236.64	0.0188841	0.008484	0.012981	0.010722	0.00641971	0.00454104	0.00417582	0.00830205
236.88	0.0188384	0.007945	0.012829	0.01052	0.00649671	0.00431281	0.00457422	0.00817071
237.12	0.0187915	0.008562	0.01309	0.010668	0.0060686	0.00431423	0.00427009	0.0080012
237.36	0.0188685	0.008432	0.013111	0.0109	0.00609877	0.00424661	0.00454094	0.00824018
237.6	0.0191958	0.008268	0.013001	0.010988	0.00625222	0.00452457	0.00465408	0.00800326
237.84	0.0184724	0.008515	0.013045	0.010413	0.00633297	0.00419805	0.00472783	0.00814724
238.08	0.0187318	0.008456	0.012775	0.010659	0.00678677	0.00395184	0.0046201	0.00809694
238.32	0.0184474	0.008358	0.012985	0.011166	0.00639093	0.00432434	0.00466824	0.00817896
238.56	0.01904	0.008421	0.012837	0.010068	0.0064775	0.0043923	0.00459018	0.00777991
238.8	0.0188145	0.008536	0.012674	0.010875	0.00652482	0.00447745	0.00461833	0.00813147
239.04	0.0185947	0.008351	0.012775	0.011185	0.0067492	0.00401539	0.00459721	0.00789692
239.28	0.0191011	0.008476	0.012764	0.010651	0.00667282	0.00413084	0.00446149	0.00785588
239.52	0.018719	0.008495	0.01285	0.010381	0.0059759	0.00432202	0.00421631	0.00806357
239.76	0.0187562	0.008586	0.012761	0.010819	0.00604741	0.00431264	0.0039867	0.00781749

## Sheet: M4R
	Nucleotide depleted				plus GTP
Time	Exp1	Exp2	Exp3	Exp4	Exp1	Exp2	Exp3	Exp4
0	-0.00011	0.000265	-9.456e-05	0.000111	9.344e-05	-3.44e-06	0.00017	0.000245
0.24	-3.8e-05	-5.5e-05	8.544e-05	-5.9e-05	0.00026344	6.56e-06	-2e-05	3.49e-05
0.48	0.000122	0.000185	-0.00023456	0.000181	-0.0003966	0.000107	2.97e-05	1.49e-05
0.72	1.21e-05	6.54e-05	-0.00013456	-0.00015	7.344e-05	-0.000113	-3e-05	-0.00023
0.96	4.21e-05	0.000225	0.00019544	-3.9e-05	-0.0002166	1.66e-05	-6e-05	-0.00013
1.2	7.21e-05	5.54e-05	7.544e-05	-4.9e-05	0.00016344	-2.34e-05	-8e-05	5.49e-05
1.44	-3.8e-05	-0.00012	-1.456e-05	-0.00012	-0.0001866	6.66e-05	6.97e-05	4.88e-06
1.68	0.000252	0.000225	0.00014544	-0.00013	-9.656e-05	0.000267	4.97e-05	0.000165
1.92	-0.00012	6.54e-05	8.544e-05	0.000131	-0.0001266	-2.34e-05	1.97e-05	1.49e-05
2.16	2.21e-05	0.000105	0.00015544	-7.9e-05	0.00017344	-0.000113	-0.00012	-7.5e-05
2.4	4.21e-05	0.000155	-2.456e-05	2.1e-05	-0.0002066	0.000117	-8e-05	7.49e-05
2.64	0.000352	0.000315	-8.456e-05	6.1e-05	0.00030344	0.000207	0.00019	0.000165
2.88	0.000192	0.000135	-0.00015456	4.1e-05	1.344e-05	-1.34e-05	-1e-05	-0.00011
3.12	-5.8e-05	-0.00019	0.00024544	-2.9e-05	9.344e-05	1.66e-05	-1e-05	1.49e-05
3.36	0.000142	1.54e-05	-1.456e-05	3.1e-05	0.00025344	5.66e-05	4.97e-05	0.000105
3.6	-6.8e-05	-5.5e-05	-0.00012456	-0.00017	2.344e-05	5.66e-05	-4e-05	0.000205
3.84	-1.8e-05	0.000255	0.00018544	0.000251	0.00015344	4.66e-05	-3e-05	-1.5e-05
4.08	9.21e-05	0.000175	-0.00011456	0.000201	-0.0003566	-7.34e-05	-6e-05	-3.5e-05
4.32	-2.8e-05	-3.5e-05	-0.00032456	-9.9e-05	-0.0002166	6.66e-05	5.97e-05	5.49e-05
4.56	0.000152	-8.5e-05	-1.456e-05	9.1e-05	-0.0001466	-1.34e-05	-4e-05	-0.00015
4.8	-0.00011	9.54e-05	1.544e-05	9.6e-07	0.00013344	6.56e-06	-3e-05	-2.5e-05
5.04	0.000102	-2.5e-05	2.544e-05	-5.9e-05	0.00019344	-0.000223	0.00026	0.000175
5.28	-9.8e-05	0.000175	-4.456e-05	-1.9e-05	0.00017344	-2.34e-05	4.97e-05	-0.00028
5.52	-0.00015	9.54e-05	0.00025544	0.000191	9.344e-05	-0.000133	-5e-05	-0.00025
5.76	5.21e-05	-0.00012	-2.456e-05	7.1e-05	5.344e-05	-8.34e-05	-7e-05	0.000165
6	0.000282	5.44e-06	-0.00011456	-0.00015	5.344e-05	2.66e-05	-0.00015	-3.5e-05
6.24	-9.8e-05	9.54e-05	-7.456e-05	0.000271	0.00022344	0.000167	-0.00013	7.49e-05
6.48	-5.8e-05	0.000175	-0.00026456	4.1e-05	6.344e-05	2.66e-05	9.68e-06	6.49e-05
6.72	7.21e-05	0.000185	-9.456e-05	-0.00016	7.344e-05	-8.34e-05	0.00014	0.000125
6.96	0.000272	0.000255	-0.00027456	-9.9e-05	0.00035344	7.66e-05	9.68e-06	7.49e-05
7.2	-0.00041	-1.5e-05	-0.00011456	-0.00018	0.00018344	7.66e-05	-0.00011	3.49e-05
7.44	3.21e-05	9.54e-05	-0.00023456	-1.9e-05	-0.0002266	0.000177	0.00017	-6.5e-05
7.68	-1.8e-05	-0.00013	7.544e-05	-8.9e-05	1.344e-05	-0.000113	2.97e-05	1.49e-05
7.92	0.000102	0.000245	5.44e-06	0.000131	-0.0001566	7.66e-05	1.97e-05	4.49e-05
8.16	0.000142	8.54e-05	8.544e-05	3.1e-05	0.00019344	-0.000113	0.00024	-0.00014
8.4	0.000162	4.54e-05	0.00013544	-2.9e-05	-0.0002866	-3.44e-06	1.97e-05	-0.00012
8.64	-2.8e-05	3.54e-05	-2.456e-05	7.1e-05	9.344e-05	9.66e-05	-8e-05	-1.5e-05
8.88	0.000232	5.44e-06	8.544e-05	5.1e-05	-0.0001766	6.56e-06	0.00014	6.49e-05
9.12	0.000242	2.54e-05	-0.00023456	4.1e-05	-0.0001966	-0.000133	0.00017	-5.1e-06
9.36	-0.00047	-0.00022	5.544e-05	-5.9e-05	6.344e-05	2.66e-05	-0.00011	3.49e-05
9.6	-2.8e-05	-0.00011	0.00021544	-5.9e-05	1.344e-05	-0.000353	-2e-05	0.000245
9.84	2.21e-05	-0.00013	-9.456e-05	-0.00012	0.00022344	0.000197	8.97e-05	0.000165
10.08	-0.00018	5.54e-05	-8.456e-05	0.000151	-0.0003466	-3.44e-06	-3e-05	-0.00033
10.32	3.21e-05	-2.5e-05	0.00022544	-0.00022	-0.0002166	-4.34e-05	4.97e-05	-0.00011
10.56	-6.8e-05	-0.00015	-0.00016456	-2.9e-05	-3.656e-05	-3.44e-06	0.00015	1.49e-05
10.8	0.000122	-0.00017	5.544e-05	-4.9e-05	-0.0002666	0.000167	-0.00011	-0.00011
11.04	-4.8e-05	1.54e-05	-0.00012456	-0.00029	-0.0001766	0.000137	6.97e-05	0.000195
11.28	6.21e-05	-3.5e-05	-0.00032456	-1.9e-05	-1.656e-05	-0.000103	0.00014	0.000135
11.52	-0.00015	0.000255	-0.00024456	5.1e-05	0.00015344	-3.34e-05	-5e-05	-0.00023
11.76	-9.8e-05	2.54e-05	-3.456e-05	1.1e-05	0.00040344	0.000117	-0.00011	5.49e-05
12	-7.9e-06	0.000105	-6.456e-05	0.000171	-1.656e-05	0.000167	-5e-05	-3.5e-05
12.24	-0.00011	3.54e-05	-0.00015456	2.1e-05	-0.0002266	8.66e-05	-0.00014	6.49e-05
12.48	-6.8e-05	5.54e-05	-4.456e-05	0.000121	0.00010344	2.66e-05	0.00015	-0.00014
12.72	2.08e-06	0.000125	-3.456e-05	3.1e-05	9.344e-05	1.66e-05	-0.00021	0.000115
12.96	0.000102	-6.5e-05	0.00014544	0.000241	-0.0001266	-1.34e-05	9.68e-06	0.000225
13.2	0.000252	-0.00017	8.544e-05	0.000251	3.44e-06	0.000227	1.97e-05	-0.00032
13.44	-7.9e-06	-4.5e-05	-8.456e-05	-0.00016	-0.0001066	1.66e-05	6.97e-05	-1.5e-05
13.68	5.21e-05	6.54e-05	-0.00011456	-6.9e-05	0.00015344	-0.000113	1.97e-05	2.49e-05
13.92	-7.8e-05	-0.00024	-4.456e-05	-3.9e-05	-1.656e-05	0.000167	0.00019	-0.00015
14.16	0.000132	-4.6e-06	-0.00010456	0.000211	-0.0003266	3.66e-05	-0.00029	0.000195
14.4	-0.00014	-0.00024	6.544e-05	-0.00026	9.344e-05	-9.34e-05	0.00035	-3.5e-05
14.64	0.000202	5.54e-05	-7.456e-05	3.1e-05	9.344e-05	9.66e-05	-0.00021	0.000105
14.88	2.08e-06	5.44e-06	-0.00014456	-1.9e-05	9.344e-05	-0.000113	-3e-05	-5.1e-06
15.12	0.000262	-0.00013	5.544e-05	0.000271	3.44e-06	3.66e-05	7.97e-05	-5.1e-06
15.36	-4.8e-05	-9.5e-05	0.00023544	9.6e-07	0.00025344	-3.34e-05	-0.0002	5.49e-05
15.6	4.21e-05	-6.5e-05	-9.456e-05	4.1e-05	0.00010344	-0.000353	0.00019	4.88e-06
15.84	2.08e-06	-0.00016	0.00018544	5.1e-05	-0.0002966	2.66e-05	0.00013	-0.00012
16.08	-0.00013	0.000165	-1.456e-05	-0.00021	0.00033344	-2.34e-05	4.97e-05	-0.00017
16.32	0.000302	-7.5e-05	3.544e-05	-0.00012	0.00014344	0.000127	0.0002	-3.5e-05
16.56	0.000112	-0.00012	4.544e-05	2.1e-05	0.00016344	3.66e-05	-5e-05	-2.5e-05
16.8	-0.00032	0.000215	7.544e-05	0.000181	-1.656e-05	-0.000103	1.97e-05	-8.5e-05
17.04	-5.8e-05	-3.5e-05	0.00011544	2.1e-05	-0.0001766	-0.000203	4.97e-05	-5.5e-05
17.28	0.000332	9.54e-05	-4.56e-06	4.1e-05	0.00015344	-0.000223	-4e-05	-1.5e-05
17.52	-0.00013	-0.00025	0.00013544	-5.9e-05	-6.656e-05	0.000257	-0.00011	-0.00015
17.76	-0.00031	0.000105	-0.00014456	-0.00014	-6.656e-05	1.66e-05	-0.00013	6.49e-05
18	5.21e-05	6.54e-05	-1.456e-05	-0.00017	-7.656e-05	-0.000203	0.00015	0.000135
18.24	2.21e-05	-7.5e-05	5.544e-05	0.000121	5.344e-05	-0.000143	7.97e-05	4.49e-05
18.48	0.000312	-0.0001	4.544e-05	-5.9e-05	-0.0002666	2.66e-05	0.00034	0.000115
18.72	0.000352	-0.00012	-0.00011456	-0.00013	-0.0002666	0.000127	-0.00024	-7.5e-05
18.96	-6.8e-05	9.54e-05	-0.00018456	0.000211	0.00026344	-6.34e-05	-0.00022	4.88e-06
19.2	0.000192	5.54e-05	-0.00043456	-6.9e-05	0.00021344	9.66e-05	-0.00022	4.88e-06
19.44	-0.00039	-1.5e-05	0.00011544	0.000221	0.00026344	3.66e-05	6.97e-05	-4.5e-05
19.68	7.21e-05	-0.00043	0.00011544	0.000111	-0.0001766	-0.000223	-0.00024	4.88e-06
19.92	0.000202	8.54e-05	-0.00023456	-7.9e-05	-3.656e-05	0.000187	3.97e-05	0.000105
20.16	-0.00022	0.000155	0.00018544	-7.9e-05	-0.0001266	-0.000153	-0.00039	0.000145
20.4	-2.8e-05	-0.00015	-5.456e-05	-0.00015	0.00015344	0.000237	-0.00019	-3.5e-05
20.64	-6.8e-05	-9.5e-05	-0.00011456	-5.9e-05	0.00012344	-0.000143	-5e-05	0.000105
20.88	-5.8e-05	-0.00023	2.544e-05	3.1e-05	0.00012344	0.000167	9.68e-06	7.49e-05
21.12	-0.00021	0.000225	5.44e-06	0.000101	0.00020344	-0.000233	7.97e-05	9.49e-05
21.36	2.08e-06	-0.00015	-9.456e-05	-1.9e-05	0.00010344	-0.000313	-7e-05	-0.00021
21.6	0.000292	9.54e-05	-1.456e-05	3.1e-05	9.344e-05	-4.34e-05	-0.00022	0.000195
21.84	6.21e-05	-0.00013	-0.00024456	-0.00013	0.00017344	6.66e-05	3.97e-05	-8.5e-05
22.08	-7.8e-05	1.54e-05	0.00011544	-9.9e-05	-0.0001366	9.66e-05	0.00025	-0.00014
22.32	-3.8e-05	-0.00019	5.544e-05	0.000141	2.344e-05	8.66e-05	-0.00012	1.49e-05
22.56	-8.8e-05	-7.5e-05	3.544e-05	-6.9e-05	2.344e-05	-0.000113	5.97e-05	0.000165
22.8	8.21e-05	-8.5e-05	4.544e-05	0.000211	3.44e-06	-0.000123	-4e-05	0.000245
23.04	-8.8e-05	-0.00012	8.544e-05	-9.9e-05	-5.656e-05	0.000147	-0.00018	0.000135
23.28	-0.00021	3.54e-05	0.00016544	-0.00014	6.344e-05	7.66e-05	0.00023	-8.5e-05
23.52	-0.00011	0.000265	8.544e-05	0.000141	-5.656e-05	-2.34e-05	-9e-05	6.49e-05
23.76	7.21e-05	0.000295	0.00018544	-0.00031	-0.0002166	0.000117	-0.00023	-2.5e-05
24	-0.00013	-0.00014	0.00041544	-5.9e-05	-1.656e-05	8.66e-05	-4e-05	-0.00014
24.24	-0.00024	-0.00016	5.44e-06	-0.00015	-0.0003166	-3.44e-06	-0.00012	-7.5e-05
24.48	-0.00024	-0.00035	-0.00012456	-0.00019	0.00017344	0.000237	-0.0003	-6.5e-05
24.72	-8.8e-05	7.54e-05	-7.456e-05	-3.9e-05	-0.0001766	-4.34e-05	-7e-05	0.000175
24.96	-0.00022	0.000175	5.544e-05	8.1e-05	-0.0003566	8.66e-05	5.97e-05	-0.00013
25.2	4.21e-05	-0.00019	-0.00013456	0.000161	-7.656e-05	-0.000103	4.97e-05	0.000115
25.44	-9.8e-05	7.54e-05	0.00011544	7.1e-05	0.00021344	-2.34e-05	0.00036	-0.00014
25.68	-6.8e-05	0.000125	5.544e-05	0.000191	-0.0003066	-4.34e-05	0.00015	-4.5e-05
25.92	8.21e-05	-0.00041	5.544e-05	0.000171	0.00023344	-7.34e-05	2.97e-05	-5.1e-06
26.16	0.000212	-9.5e-05	-1.456e-05	-6.9e-05	0.00034344	-0.000103	0.0003	0.000185
26.4	-0.00013	0.000105	7.544e-05	6.1e-05	0.00032344	-0.000193	4.97e-05	-0.00028
26.64	-0.00021	-9.5e-05	-0.00022456	-2.9e-05	-8.656e-05	-3.34e-05	3.97e-05	-0.00013
26.88	-5.8e-05	-1.5e-05	-9.456e-05	2.1e-05	-0.0002666	2.66e-05	0.00011	0.000195
27.12	0.000102	0.000145	-0.00019456	-0.0003	-6.56e-06	-7.34e-05	-0.00019	0.000235
27.36	-0.00018	5.54e-05	-0.00015456	-1.9e-05	-2.656e-05	-5.34e-05	6.97e-05	0.000135
27.6	6.21e-05	-0.00012	-0.00024456	-0.00011	0.00016344	0.000227	0.00011	-2.5e-05
27.84	4.21e-05	-0.00033	-0.00032456	0.000221	-0.0001266	0.000157	-0.00012	-0.00034
28.08	4.21e-05	4.54e-05	-3.456e-05	-1.9e-05	3.344e-05	2.66e-05	-0.0002	0.000175
28.32	-0.00026	5.44e-06	-5.456e-05	-6.9e-05	0.00011344	-0.000123	5.97e-05	-0.00019
28.56	-1.8e-05	-2.5e-05	5.44e-06	0.000251	-0.0001566	-4.34e-05	0.00021	-3.5e-05
28.8	-7.8e-05	-5.5e-05	-9.456e-05	0.000131	-0.0001966	-2.34e-05	8.97e-05	-0.00016
29.04	4.21e-05	-0.00014	-0.00015456	-0.00023	-0.0001666	-0.000133	1.97e-05	-0.00012
29.28	-4.8e-05	7.54e-05	-3.456e-05	-9.9e-05	-0.0002266	5.66e-05	-0.00027	0.000125
29.52	0.000172	-1.5e-05	-5.456e-05	-9e-06	-0.0001366	-0.000163	8.97e-05	-0.00031
29.76	-0.00018	8.54e-05	0.00012544	6.1e-05	-7.656e-05	6.56e-06	-0.00014	-0.00012
30	0.000142	0.000285	0.00054544	0.000381	9.344e-05	7.66e-05	0.00019	-2.5e-05
30.24	0.000472	0.000495	0.00052544	0.000421	0.00044344	0.000387	0.00032	0.000325
30.48	0.000812	0.000485	-0.00807456	0.000601	0.00055344	0.000577	0.00034	0.000635
30.72	-0.00881	-0.00838	-0.0426846	-0.00961	-0.0092366	-0.008453	-0.00779	-0.00951
30.96	-0.0481	-0.04593	0.0169754	-0.05079	-0.0487966	-0.045393	-0.04309	-0.05011
31.2	0.018362	0.016845	-0.0146446	0.020651	0.0199134	0.018227	0.01741	0.020185
31.44	-0.01631	-0.0155	0.00123544	-0.01747	-0.0160566	-0.015283	-0.01409	-0.01601
31.68	0.001332	0.001355	0.00102544	0.001531	0.00188344	0.001477	0.00182	0.001945
31.92	0.001542	0.001385	0.00122544	0.001191	0.00192344	0.001537	0.00167	0.001915
32.16	0.001332	0.001215	0.00114544	0.001261	0.00212344	0.001547	0.002	0.002345
32.4	0.001582	0.001245	0.00116544	0.001331	0.00197344	0.001787	0.00183	0.002215
32.64	0.001592	0.001375	0.00171544	0.001521	0.00187344	0.001727	0.00195	0.002245
32.88	0.001432	0.001525	0.00144544	0.001491	0.00227344	0.002047	0.00236	0.002715
33.12	0.001792	0.001755	0.00145544	0.001491	0.00231344	0.002157	0.00255	0.002695
33.36	0.001542	0.001455	0.00164544	0.001421	0.00279344	0.001867	0.00272	0.002845
33.6	0.001652	0.001595	0.00153544	0.001631	0.00281344	0.002157	0.00267	0.002705
33.84	0.001812	0.001795	0.00191544	0.001621	0.00263344	0.002277	0.00283	0.003055
34.08	0.002002	0.001905	0.00192544	0.002011	0.00314344	0.002277	0.00292	0.003085
34.32	0.002422	0.001895	0.00175544	0.001801	0.00284344	0.002487	0.00292	0.003145
34.56	0.002122	0.001925	0.00174544	0.001821	0.00317344	0.002417	0.00317	0.003175
34.8	0.002182	0.001865	0.00189544	0.001821	0.00309344	0.002597	0.003	0.003485
35.04	0.002532	0.001925	0.00204544	0.001681	0.00313344	0.002607	0.00321	0.003455
35.28	0.002612	0.001885	0.00183544	0.001761	0.00355344	0.002707	0.00338	0.003475
35.52	0.002222	0.001805	0.00202544	0.001761	0.00307344	0.002627	0.00335	0.003655
35.76	0.002352	0.001875	0.00198544	0.001681	0.00362344	0.002857	0.00361	0.003795
36	0.002252	0.001955	0.00193544	0.001871	0.00361344	0.002807	0.00359	0.003945
36.24	0.002142	0.002015	0.00212544	0.001951	0.00345344	0.002547	0.00353	0.003545
36.48	0.002322	0.001965	0.00209544	0.001991	0.00352344	0.003037	0.00367	0.003945
36.72	0.002602	0.002145	0.00221544	0.001931	0.00372344	0.002977	0.00363	0.004035
36.96	0.002402	0.002055	0.00256544	0.002051	0.00380344	0.003127	0.00384	0.004075
37.2	0.002532	0.002075	0.00234544	0.001831	0.00380344	0.002897	0.00385	0.003835
37.44	0.002692	0.001895	0.00208544	0.001811	0.00378344	0.002907	0.00376	0.003985
37.68	0.002912	0.001835	0.00225544	0.001921	0.00396344	0.003097	0.00392	0.004105
37.92	0.002632	0.002035	0.00223544	0.002021	0.00412344	0.003337	0.00404	0.004105
38.16	0.002542	0.001925	0.00251544	0.001951	0.00371344	0.003297	0.00389	0.004205
38.4	0.002772	0.002045	0.00210544	0.001901	0.00415344	0.003247	0.00422	0.004105
38.64	0.002692	0.001915	0.00229544	0.001991	0.00388344	0.003397	0.00373	0.004035
38.88	0.002612	0.002235	0.00247544	0.002181	0.00392344	0.003247	0.00389	0.004205
39.12	0.002262	0.002335	0.00231544	0.001911	0.00425344	0.003417	0.00415	0.004165
39.36	0.002702	0.002215	0.00249544	0.001761	0.00422344	0.003247	0.0042	0.004435
39.6	0.002612	0.002215	0.00242544	0.002131	0.00433344	0.003287	0.00404	0.004335
39.84	0.002692	0.002525	0.00235544	0.001951	0.00411344	0.003137	0.00455	0.003935
40.08	0.002712	0.002455	0.00212544	0.001931	0.00453344	0.003617	0.00431	0.004575
40.32	0.002592	0.002575	0.00250544	0.002021	0.00459344	0.003357	0.00413	0.004325
40.56	0.002432	0.002205	0.00239544	0.001871	0.00439344	0.003607	0.00447	0.004535
40.8	0.002802	0.002265	0.00228544	0.002051	0.00444344	0.003337	0.00471	0.004565
41.04	0.002882	0.002235	0.00211544	0.002071	0.00470344	0.003677	0.00456	0.004435
41.28	0.002822	0.002315	0.00264544	0.002161	0.00453344	0.003167	0.00432	0.004665
41.52	0.002612	0.001965	0.00223544	0.002001	0.00445344	0.003427	0.00429	0.004905
41.76	0.002892	0.002395	0.00245544	0.002111	0.00411344	0.003307	0.00477	0.004725
42	0.003152	0.002525	0.00238544	0.002251	0.00441344	0.003307	0.00427	0.004605
42.24	0.002812	0.002225	0.00256544	0.002081	0.00464344	0.003487	0.00433	0.004665
42.48	0.002982	0.002105	0.00243544	0.002271	0.00445344	0.003587	0.00462	0.004785
42.72	0.002982	0.002335	0.00255544	0.002181	0.00451344	0.003337	0.0047	0.004565
42.96	0.003012	0.002395	0.00243544	0.002141	0.00462344	0.003377	0.00471	0.004975
43.2	0.002682	0.002215	0.00279544	0.002101	0.00468344	0.003527	0.0046	0.004685
43.44	0.002942	0.002125	0.00241544	0.002371	0.00453344	0.003527	0.00452	0.004605
43.68	0.002982	0.002385	0.00252544	0.001931	0.00476344	0.003507	0.00463	0.004945
43.92	0.003362	0.002125	0.00262544	0.002201	0.00477344	0.003667	0.00446	0.004805
44.16	0.002832	0.002395	0.00275544	0.001961	0.00483344	0.003607	0.00433	0.004805
44.4	0.003072	0.002555	0.00279544	0.002081	0.00495344	0.003457	0.00458	0.004875
44.64	0.003142	0.002195	0.00272544	0.002111	0.00493344	0.003777	0.00475	0.005115
44.88	0.003012	0.002495	0.00249544	0.002151	0.00429344	0.003477	0.0046	0.004715
45.12	0.002742	0.002185	0.00264544	0.002121	0.00477344	0.003497	0.00482	0.004765
45.36	0.003072	0.002145	0.00241544	0.002161	0.00482344	0.003187	0.00466	0.005055
45.6	0.003082	0.002585	0.00265544	0.002361	0.00494344	0.003657	0.00463	0.004955
45.84	0.003162	0.002285	0.00248544	0.002141	0.00479344	0.003977	0.00468	0.005005
46.08	0.003032	0.002545	0.00270544	0.002161	0.00506344	0.003537	0.00505	0.004875
46.32	0.003252	0.002335	0.00248544	0.002221	0.00490344	0.003637	0.00476	0.004945
46.56	0.002892	0.002385	0.00257544	0.002191	0.00459344	0.003657	0.00499	0.004935
46.8	0.003192	0.002545	0.00247544	0.002061	0.00513344	0.003457	0.00513	0.004875
47.04	0.002772	0.002205	0.00274544	0.002111	0.00488344	0.003917	0.00484	0.005145
47.28	0.002982	0.002465	0.00289544	0.002021	0.00478344	0.003667	0.00482	0.005165
47.52	0.003012	0.002335	0.00262544	0.002051	0.00494344	0.003517	0.00474	0.005015
47.76	0.002922	0.002365	0.00280544	0.002281	0.00480344	0.003547	0.00484	0.004955
48	0.003112	0.002115	0.00262544	0.002201	0.00515344	0.003697	0.00502	0.005295
48.24	0.002962	0.002365	0.00285544	0.002031	0.00508344	0.003737	0.00466	0.004815
48.48	0.002902	0.002325	0.00247544	0.002041	0.00469344	0.003617	0.00453	0.005175
48.72	0.002902	0.002435	0.00283544	0.002071	0.00496344	0.003777	0.00477	0.004995
48.96	0.003462	0.002595	0.00257544	0.002221	0.00557344	0.003587	0.00498	0.005195
49.2	0.002802	0.002465	0.00258544	0.002181	0.00531344	0.003697	0.00481	0.004935
49.44	0.003142	0.001955	0.00280544	0.001941	0.00501344	0.003707	0.00499	0.005275
49.68	0.003062	0.002375	0.00247544	0.002181	0.00496344	0.003727	0.00491	0.005135
49.92	0.003002	0.002525	0.00244544	0.002231	0.00498344	0.003657	0.00491	0.005215
50.16	0.003372	0.002175	0.00260544	0.002291	0.00527344	0.004187	0.00487	0.005235
50.4	0.003182	0.002365	0.00263544	0.002091	0.00487344	0.003677	0.00512	0.005085
50.64	0.003042	0.002275	0.00275544	0.002141	0.00496344	0.003567	0.00478	0.005265
50.88	0.002902	0.002385	0.00259544	0.002091	0.00501344	0.003647	0.00474	0.005185
51.12	0.002922	0.002415	0.00272544	0.002371	0.00508344	0.003777	0.00497	0.005155
51.36	0.003202	0.002485	0.00283544	0.002111	0.00503344	0.003627	0.0052	0.005035
51.6	0.003232	0.002155	0.00239544	0.002101	0.00506344	0.004007	0.00494	0.005355
51.84	0.002982	0.002395	0.00295544	0.002081	0.00496344	0.003757	0.00494	0.005255
52.08	0.003122	0.002195	0.00247544	0.002221	0.00527344	0.003927	0.00492	0.005215
52.32	0.003002	0.002385	0.00278544	0.002071	0.00536344	0.003497	0.00488	0.005215
52.56	0.003042	0.002115	0.00255544	0.002231	0.00511344	0.003537	0.00489	0.005485
52.8	0.003072	0.002075	0.00268544	0.002301	0.00525344	0.003627	0.00479	0.005095
53.04	0.002812	0.002405	0.00261544	0.002301	0.00533344	0.003647	0.00528	0.005225
53.28	0.003072	0.002215	0.00263544	0.002121	0.00516344	0.003537	0.00482	0.005255
53.52	0.003022	0.002215	0.00233544	0.002041	0.00518344	0.003857	0.00499	0.005095
53.76	0.003032	0.002545	0.00261544	0.002161	0.00527344	0.003677	0.00467	0.005355
54	0.003002	0.002545	0.00264544	0.002191	0.00489344	0.004107	0.00476	0.005215
54.24	0.003022	0.002735	0.00285544	0.002421	0.00500344	0.003717	0.00486	0.005265
54.48	0.003152	0.002825	0.00271544	0.002111	0.00516344	0.003827	0.00494	0.005215
54.72	0.002562	0.002305	0.00271544	0.002261	0.00514344	0.003837	0.00524	0.005075
54.96	0.003172	0.002495	0.00250544	0.002101	0.00531344	0.003737	0.00476	0.005115
55.2	0.002842	0.002425	0.00256544	0.002281	0.00489344	0.003607	0.00489	0.005015
55.44	0.003252	0.002385	0.00234544	0.002381	0.00533344	0.003677	0.00502	0.005155
55.68	0.003182	0.002335	0.00264544	0.002371	0.00501344	0.003737	0.00514	0.005235
55.92	0.003012	0.002485	0.00270544	0.002181	0.00508344	0.003547	0.00491	0.005235
56.16	0.003262	0.002205	0.00262544	0.002101	0.00530344	0.003677	0.00506	0.005325
56.4	0.003262	0.002385	0.00284544	0.002561	0.00523344	0.003937	0.0052	0.005525
56.64	0.002862	0.002365	0.00265544	0.002271	0.00501344	0.003727	0.00501	0.005325
56.88	0.003072	0.002235	0.00269544	0.002051	0.00529344	0.003947	0.00497	0.005095
57.12	0.003202	0.002165	0.00278544	0.001901	0.00529344	0.003807	0.00502	0.005375
57.36	0.003222	0.002195	0.00285544	0.002221	0.00502344	0.004027	0.00484	0.005335
57.6	0.002942	0.002405	0.00250544	0.002261	0.00488344	0.003387	0.0048	0.005265
57.84	0.002892	0.002545	0.00261544	0.002021	0.00525344	0.003517	0.0051	0.005355
58.08	0.002982	0.002285	0.00276544	0.002361	0.00522344	0.004057	0.00491	0.005355
58.32	0.003162	0.002245	0.00286544	0.002251	0.00511344	0.003917	0.00489	0.004865
58.56	0.003032	0.002675	0.00258544	0.002091	0.00487344	0.003657	0.00479	0.005125
58.8	0.003162	0.002395	0.00271544	0.002141	0.00512344	0.004267	0.00498	0.004955
59.04	0.002852	0.002235	0.00251544	0.002091	0.00506344	0.003657	0.005	0.005225
59.28	0.002872	0.002565	0.00250544	0.001971	0.00517344	0.003997	0.00493	0.005145
59.52	0.002982	0.002315	0.00263544	0.001971	0.00526344	0.003437	0.00521	0.005035
59.76	0.003032	0.002315	0.00270544	0.002241	0.00517344	0.004057	0.00494	0.005165
60	0.003152	0.002475	0.00255544	0.002331	0.00524344	0.003927	0.00504	0.005015
60.24	0.003052	0.002515	0.00265544	0.002341	0.00522344	0.003867	0.005	0.005395
60.48	0.003132	0.002375	0.00287544	0.002221	0.00526344	0.003617	0.00508	0.005355
60.72	0.003152	0.002465	0.00271544	0.002191	0.00542344	0.003887	0.00521	0.005395
60.96	0.002762	0.002195	0.00263544	0.002231	0.00532344	0.003847	0.00502	0.005155
61.2	0.002952	0.002475	0.00260544	0.002201	0.00536344	0.003777	0.00514	0.005135
61.44	0.002702	0.002515	0.00270544	0.002121	0.00554344	0.003697	0.00478	0.005145
61.68	0.002992	0.002545	0.00285544	0.002221	0.00527344	0.003617	0.00505	0.005365
61.92	0.003192	0.002255	0.00272544	0.002071	0.00557344	0.003757	0.00463	0.004945
62.16	0.003202	0.002495	0.00274544	0.002171	0.00514344	0.003747	0.00472	0.005205
62.4	0.003152	0.002205	0.00265544	0.002401	0.00517344	0.003477	0.0051	0.005355
62.64	0.002972	0.002125	0.00280544	0.001961	0.00541344	0.003757	0.00504	0.005505
62.88	0.003172	0.002205	0.00286544	0.002131	0.00490344	0.004007	0.00479	0.005345
63.12	0.003032	0.002325	0.00259544	0.002161	0.00526344	0.003847	0.005	0.005345
63.36	0.002962	0.002445	0.00269544	0.002081	0.00532344	0.003667	0.00512	0.005145
63.6	0.002992	0.002335	0.00267544	0.001991	0.00519344	0.003417	0.00497	0.005165
63.84	0.002742	0.002265	0.00264544	0.001991	0.00527344	0.003557	0.00489	0.005265
64.08	0.003212	0.002165	0.00258544	0.002011	0.00516344	0.003757	0.00485	0.005185
64.32	0.002992	0.002355	0.00266544	0.002231	0.00546344	0.003577	0.00495	0.005395
64.56	0.003322	0.002485	0.00267544	0.001901	0.00515344	0.003827	0.00504	0.005155
64.8	0.002912	0.002215	0.00275544	0.001941	0.00554344	0.003887	0.00505	0.005125
65.04	0.003252	0.002115	0.00292544	0.002011	0.00524344	0.003707	0.00497	0.005295
65.28	0.002912	0.002265	0.00255544	0.002041	0.00507344	0.003557	0.00514	0.005355
65.52	0.002962	0.002285	0.00245544	0.001961	0.00543344	0.003957	0.00492	0.005305
65.76	0.002902	0.002375	0.00261544	0.002111	0.00513344	0.003777	0.00487	0.005265
66	0.002972	0.002145	0.00273544	0.001831	0.00518344	0.004087	0.00524	0.005385
66.24	0.003022	0.002205	0.00241544	0.002041	0.00516344	0.003697	0.00485	0.005285
66.48	0.003292	0.002105	0.00281544	0.002001	0.00512344	0.003867	0.005	0.005455
66.72	0.003292	0.002095	0.00279544	0.002241	0.00515344	0.003787	0.00483	0.005015
66.96	0.003072	0.002095	0.00249544	0.002021	0.00563344	0.003597	0.00493	0.005315
67.2	0.003122	0.002255	0.00280544	0.002161	0.00515344	0.003707	0.00504	0.005115
67.44	0.002952	0.001885	0.00277544	0.001901	0.00504344	0.003637	0.00508	0.005425
67.68	0.002832	0.002435	0.00254544	0.001961	0.00505344	0.003837	0.00507	0.005425
67.92	0.003322	0.002245	0.00241544	0.001961	0.00546344	0.003787	0.00477	0.005285
68.16	0.002892	0.002345	0.00274544	0.001781	0.00523344	0.004007	0.00478	0.005345
68.4	0.002932	0.002525	0.00267544	0.002081	0.00505344	0.003797	0.00478	0.005185
68.64	0.003002	0.002415	0.00276544	0.001751	0.00518344	0.003847	0.00494	0.005305
68.88	0.003032	0.002375	0.00261544	0.002171	0.00517344	0.003697	0.00486	0.005105
69.12	0.002802	0.002385	0.00232544	0.002041	0.00531344	0.003977	0.00516	0.005085
69.36	0.002962	0.002295	0.00260544	0.001921	0.00495344	0.003747	0.00462	0.005215
69.6	0.003062	0.002105	0.00246544	0.002111	0.00511344	0.003747	0.00457	0.005155
69.84	0.002862	0.002185	0.00264544	0.001941	0.00531344	0.003557	0.00458	0.004845
70.08	0.003122	0.002265	0.00245544	0.002041	0.00512344	0.003957	0.00495	0.005045
70.32	0.002902	0.002315	0.00280544	0.001731	0.00524344	0.003767	0.00455	0.005185
70.56	0.003232	0.002195	0.00251544	0.002061	0.00498344	0.003647	0.00495	0.005645
70.8	0.002692	0.002145	0.00254544	0.001851	0.00526344	0.003687	0.0051	0.005255
71.04	0.002942	0.002085	0.00270544	0.002081	0.00537344	0.003577	0.00487	0.005305
71.28	0.002932	0.002235	0.00267544	0.001781	0.00531344	0.003527	0.00494	0.005235
71.52	0.002802	0.002385	0.00266544	0.002141	0.00525344	0.003717	0.00499	0.004915
71.76	0.002862	0.002405	0.00233544	0.001971	0.00506344	0.003747	0.00483	0.005135
72	0.003072	0.002445	0.00258544	0.001971	0.00507344	0.003777	0.00477	0.005195
72.24	0.002872	0.002095	0.00246544	0.002191	0.00516344	0.003997	0.00493	0.005005
72.48	0.002932	0.002295	0.00268544	0.002021	0.00522344	0.003847	0.00535	0.005105
72.72	0.002992	0.002155	0.00259544	0.002201	0.00517344	0.003657	0.00481	0.005245
72.96	0.003162	0.002045	0.00254544	0.002081	0.00500344	0.003577	0.00485	0.005425
73.2	0.003062	0.002245	0.00266544	0.002061	0.00523344	0.003697	0.00516	0.005115
73.44	0.002852	0.002195	0.00279544	0.001851	0.00538344	0.004017	0.00512	0.004855
73.68	0.002882	0.002345	0.00248544	0.001941	0.00524344	0.003487	0.00504	0.005005
73.92	0.002852	0.002195	0.00253544	0.001961	0.00529344	0.003717	0.00505	0.004845
74.16	0.002812	0.002195	0.00273544	0.002051	0.00526344	0.003737	0.00478	0.004975
74.4	0.003062	0.002145	0.00262544	0.001901	0.00482344	0.003927	0.00502	0.004975
74.64	0.002942	0.002045	0.00253544	0.002081	0.00526344	0.003777	0.00488	0.005035
74.88	0.002612	0.002325	0.00258544	0.001901	0.00514344	0.003967	0.00504	0.005155
75.12	0.002892	0.002295	0.00261544	0.001881	0.00490344	0.003817	0.00483	0.005125
75.36	0.002892	0.002245	0.00239544	0.002031	0.00554344	0.003627	0.00488	0.005185
75.6	0.003002	0.002195	0.00260544	0.002071	0.00552344	0.003657	0.00489	0.005205
75.84	0.003132	0.002075	0.00256544	0.001861	0.00520344	0.003837	0.0049	0.005305
76.08	0.003012	0.002115	0.00235544	0.001781	0.00498344	0.003807	0.00481	0.004995
76.32	0.002722	0.002035	0.00240544	0.001911	0.00526344	0.003687	0.00484	0.005195
76.56	0.002812	0.002115	0.00241544	0.002081	0.00508344	0.003647	0.00465	0.004965
76.8	0.003212	0.002015	0.00265544	0.002081	0.00517344	0.003577	0.00486	0.004945
77.04	0.003172	0.002095	0.00267544	0.002031	0.00497344	0.003567	0.00481	0.005415
77.28	0.002842	0.002245	0.00254544	0.001931	0.00516344	0.003427	0.00469	0.005135
77.52	0.003052	0.002475	0.00236544	0.001831	0.00511344	0.003467	0.00467	0.004985
77.76	0.003082	0.002035	0.00246544	0.001931	0.00521344	0.003627	0.00488	0.004935
78	0.002992	0.002135	0.00238544	0.001851	0.00514344	0.003747	0.00492	0.005285
78.24	0.003212	0.002235	0.00268544	0.001901	0.00512344	0.003957	0.0052	0.005255
78.48	0.002922	0.001965	0.00254544	0.002051	0.00540344	0.004067	0.00475	0.005235
78.72	0.002872	0.001875	0.00256544	0.001931	0.00491344	0.003587	0.00475	0.005405
78.96	0.002882	0.001905	0.00237544	0.002001	0.00545344	0.003917	0.00477	0.005155
79.2	0.003162	0.002275	0.00256544	0.001911	0.00498344	0.003787	0.00477	0.004915
79.44	0.002922	0.002235	0.00250544	0.002111	0.00509344	0.003947	0.00496	0.005005
79.68	0.003112	0.001775	0.00238544	0.001881	0.00515344	0.003807	0.00487	0.005195
79.92	0.003002	0.002135	0.00247544	0.002061	0.00538344	0.003797	0.00466	0.005125
80.16	0.002872	0.002015	0.00254544	0.002201	0.00520344	0.003647	0.00459	0.005395
80.4	0.002882	0.002015	0.00226544	0.001881	0.00525344	0.003587	0.0052	0.005145
80.64	0.002842	0.001875	0.00255544	0.002151	0.00521344	0.003697	0.00492	0.005165
80.88	0.002892	0.002325	0.00273544	0.001761	0.00516344	0.003677	0.00481	0.004925
81.12	0.003022	0.002005	0.00231544	0.001961	0.00539344	0.003547	0.00499	0.005145
81.36	0.002822	0.002345	0.00246544	0.001881	0.00513344	0.003737	0.00479	0.005015
81.6	0.002932	0.001995	0.00237544	0.001801	0.00541344	0.003737	0.00475	0.005215
81.84	0.002812	0.002405	0.00246544	0.002021	0.00535344	0.003467	0.00498	0.005085
82.08	0.002882	0.002145	0.00246544	0.001781	0.00536344	0.003807	0.00487	0.005045
82.32	0.002722	0.002135	0.00239544	0.001851	0.00513344	0.003887	0.00478	0.004915
82.56	0.002722	0.002165	0.00248544	0.001901	0.00494344	0.003707	0.00471	0.005015
82.8	0.002522	0.001955	0.00226544	0.001841	0.00501344	0.003517	0.00473	0.005035
83.04	0.002722	0.002165	0.00273544	0.002051	0.00498344	0.003717	0.00505	0.005205
83.28	0.002902	0.002075	0.00259544	0.001811	0.00519344	0.003527	0.00456	0.005035
83.52	0.002842	0.002035	0.00201544	0.001611	0.00520344	0.003787	0.00484	0.004995
83.76	0.002762	0.002005	0.00249544	0.002031	0.00501344	0.003907	0.00484	0.004955
84	0.002572	0.001905	0.00247544	0.001641	0.00503344	0.003587	0.0048	0.004935
84.24	0.002642	0.002125	0.00238544	0.001921	0.00497344	0.003767	0.00474	0.005035
84.48	0.002772	0.001955	0.00233544	0.001711	0.00509344	0.003737	0.00471	0.004805
84.72	0.002682	0.002125	0.00263544	0.002061	0.00547344	0.003757	0.00478	0.005105
84.96	0.002522	0.001905	0.00229544	0.001821	0.00509344	0.003517	0.00491	0.005175
85.2	0.003252	0.002205	0.00265544	0.002031	0.00519344	0.003687	0.00476	0.004945
85.44	0.002982	0.001995	0.00246544	0.002141	0.00527344	0.003847	0.00475	0.004995
85.68	0.002702	0.002105	0.00264544	0.001831	0.00492344	0.003667	0.00499	0.004965
85.92	0.002852	0.002435	0.00242544	0.001971	0.00504344	0.003537	0.00496	0.005185
86.16	0.002702	0.002075	0.00233544	0.001791	0.00492344	0.003747	0.00485	0.005095
86.4	0.002602	0.002205	0.00263544	0.001821	0.00516344	0.003807	0.00459	0.005025
86.64	0.002922	0.001975	0.00243544	0.001561	0.00510344	0.003577	0.00469	0.004875
86.88	0.002782	0.002015	0.00259544	0.001581	0.00540344	0.003527	0.00469	0.005255
87.12	0.002932	0.001755	0.00218544	0.001801	0.00478344	0.003197	0.00486	0.005065
87.36	0.002682	0.002045	0.00262544	0.001971	0.00483344	0.003717	0.00471	0.005015
87.6	0.002672	0.002125	0.00266544	0.001741	0.00543344	0.003657	0.00457	0.004695
87.84	0.002722	0.002085	0.00245544	0.001851	0.00543344	0.003477	0.00442	0.005075
88.08	0.002812	0.001975	0.00236544	0.001721	0.00512344	0.003707	0.00477	0.004995
88.32	0.002852	0.002045	0.00212544	0.001901	0.00497344	0.003747	0.00485	0.005195
88.56	0.002692	0.002355	0.00197544	0.001681	0.00513344	0.003377	0.00464	0.005055
88.8	0.002742	0.002265	0.00233544	0.002031	0.00508344	0.003507	0.00466	0.005135
89.04	0.002592	0.002075	0.00248544	0.001781	0.00541344	0.003667	0.00473	0.005035
89.28	0.002632	0.001965	0.00229544	0.001671	0.00517344	0.003577	0.00474	0.005065
89.52	0.002582	0.002025	0.00253544	0.001881	0.00539344	0.003467	0.00455	0.005065
89.76	0.003222	0.002085	0.00238544	0.002071	0.00502344	0.003517	0.00477	0.005015
90	0.002722	0.002165	0.00245544	0.001681	0.00482344	0.003927	0.0048	0.005215
90.24	0.002882	0.002085	0.00235544	0.001761	0.00504344	0.003767	0.00463	0.005125
90.48	0.002942	0.001685	0.00242544	0.001881	0.00479344	0.003397	0.00461	0.005075
90.72	0.003022	0.001875	0.00254544	0.001901	0.00508344	0.003727	0.00473	0.004935
90.96	0.003082	0.002115	0.00260544	0.001921	0.00518344	0.003667	0.00469	0.004675
91.2	0.002892	0.001975	0.00232544	0.001501	0.00507344	0.003577	0.00454	0.004915
91.44	0.002642	0.002115	0.00229544	0.001571	0.00496344	0.003647	0.00488	0.005105
91.68	0.002822	0.002045	0.00257544	0.001831	0.00530344	0.003627	0.00492	0.005205
91.92	0.002842	0.001915	0.00271544	0.001821	0.00482344	0.003517	0.00462	0.004935
92.16	0.002952	0.001955	0.00246544	0.001701	0.00485344	0.003777	0.00468	0.004915
92.4	0.002692	0.001945	0.00250544	0.002161	0.00489344	0.003627	0.00473	0.004875
92.64	0.002452	0.002075	0.00230544	0.001841	0.00500344	0.003467	0.00493	0.005005
92.88	0.002632	0.001875	0.00220544	0.001881	0.00507344	0.003777	0.00478	0.004855
93.12	0.002562	0.002085	0.00232544	0.001791	0.00523344	0.003507	0.00442	0.005105
93.36	0.002532	0.001685	0.00241544	0.001911	0.00500344	0.003627	0.00459	0.005155
93.6	0.002752	0.001915	0.00239544	0.001951	0.00512344	0.003507	0.00454	0.005015
93.84	0.002622	0.002035	0.00245544	0.001751	0.00510344	0.003617	0.00478	0.004955
94.08	0.002492	0.002065	0.00234544	0.001771	0.00508344	0.003747	0.00474	0.005065
94.32	0.002732	0.002025	0.00238544	0.001701	0.00484344	0.003527	0.00487	0.004675
94.56	0.003092	0.002065	0.00252544	0.001661	0.00505344	0.003457	0.00438	0.004715
94.8	0.002592	0.001925	0.00240544	0.001531	0.00479344	0.003857	0.00458	0.004915
95.04	0.002212	0.002295	0.00245544	0.001801	0.00526344	0.003387	0.00467	0.005285
95.28	0.002862	0.001885	0.00238544	0.001991	0.00505344	0.003687	0.0049	0.004855
95.52	0.002282	0.002185	0.00219544	0.001911	0.00531344	0.003757	0.00494	0.004935
95.76	0.002572	0.001825	0.00227544	0.001931	0.00472344	0.003607	0.00473	0.005055
96	0.002792	0.001855	0.00234544	0.001531	0.00533344	0.003447	0.00496	0.004645
96.24	0.002642	0.002055	0.00216544	0.001501	0.00489344	0.003727	0.00463	0.004715
96.48	0.002582	0.002015	0.00249544	0.001641	0.00492344	0.003547	0.00476	0.004935
96.72	0.002472	0.001675	0.00216544	0.001671	0.00487344	0.003547	0.0048	0.005005
96.96	0.002732	0.001915	0.00230544	0.001831	0.00516344	0.003747	0.00484	0.004825
97.2	0.002582	0.001985	0.00228544	0.001771	0.00489344	0.003847	0.00485	0.004835
97.44	0.002772	0.002215	0.00224544	0.002041	0.00517344	0.003647	0.00456	0.004645
97.68	0.002652	0.002095	0.00242544	0.001851	0.00505344	0.003587	0.00482	0.004725
97.92	0.002752	0.001805	0.00226544	0.001801	0.00489344	0.003647	0.00437	0.004775
98.16	0.002662	0.002085	0.00227544	0.001701	0.00469344	0.003917	0.00437	0.004915
98.4	0.002402	0.002025	0.00226544	0.001841	0.00508344	0.003707	0.00473	0.004825
98.64	0.002322	0.001885	0.00225544	0.001661	0.00463344	0.003357	0.0045	0.004815
98.88	0.002672	0.001735	0.00233544	0.001711	0.00503344	0.003467	0.00469	0.004825
99.12	0.002632	0.001855	0.00235544	0.001941	0.00491344	0.003517	0.00472	0.004625
99.36	0.002562	0.001795	0.00225544	0.001701	0.00478344	0.003617	0.00459	0.004605
99.6	0.002402	0.002025	0.00246544	0.001871	0.00516344	0.003497	0.00455	0.005145
99.84	0.002862	0.001815	0.00230544	0.001591	0.00486344	0.003727	0.005	0.004635
100.08	0.002832	0.001845	0.00201544	0.001721	0.00466344	0.003717	0.00466	0.004765
100.32	0.002602	0.001835	0.00225544	0.001721	0.00512344	0.003687	0.00472	0.004835
100.56	0.002452	0.002055	0.00234544	0.001951	0.00524344	0.003577	0.0047	0.004595
100.8	0.002502	0.002125	0.00231544	0.001841	0.00486344	0.003557	0.00461	0.004825
101.04	0.002852	0.001975	0.00252544	0.001841	0.00470344	0.003767	0.00483	0.005215
101.28	0.002632	0.001935	0.00239544	0.001651	0.00514344	0.003737	0.00471	0.004845
101.52	0.002722	0.002025	0.00243544	0.001741	0.00480344	0.003637	0.00452	0.004755
101.76	0.002772	0.001865	0.00238544	0.001841	0.00510344	0.003517	0.00454	0.004645
102	0.002702	0.002085	0.00239544	0.001681	0.00479344	0.003897	0.00479	0.004945
102.24	0.002812	0.001915	0.00246544	0.001811	0.00506344	0.003427	0.00479	0.004865
102.48	0.002592	0.002025	0.00228544	0.001661	0.00477344	0.003767	0.00476	0.004755
102.72	0.002462	0.002155	0.00246544	0.001611	0.00521344	0.003687	0.00452	0.004885
102.96	0.002522	0.001945	0.00229544	0.001641	0.00474344	0.003447	0.00461	0.004985
103.2	0.002582	0.001735	0.00231544	0.001741	0.00491344	0.003797	0.00453	0.004815
103.44	0.002622	0.002135	0.00214544	0.001521	0.00503344	0.003597	0.00457	0.004765
103.68	0.002422	0.001895	0.00240544	0.001461	0.00524344	0.003587	0.00436	0.004825
103.92	0.002322	0.001835	0.00238544	0.001921	0.00473344	0.003437	0.00467	0.004685
104.16	0.002372	0.001895	0.00209544	0.001621	0.00491344	0.003307	0.00441	0.004695
104.4	0.002902	0.001845	0.00220544	0.001731	0.00509344	0.003617	0.00416	0.004785
104.64	0.002392	0.001995	0.00234544	0.001661	0.00524344	0.003447	0.00458	0.004595
104.88	0.001982	0.001785	0.00226544	0.001641	0.00501344	0.003687	0.00456	0.004895
105.12	0.002562	0.001885	0.00241544	0.001851	0.00532344	0.003417	0.00466	0.004775
105.36	0.002722	0.001845	0.00235544	0.001661	0.00477344	0.003457	0.0045	0.004625
105.6	0.002612	0.001855	0.00221544	0.001711	0.00487344	0.003667	0.00447	0.004805
105.84	0.002512	0.001825	0.00241544	0.001501	0.00483344	0.003437	0.00454	0.004825
106.08	0.002642	0.001955	0.00221544	0.001601	0.00470344	0.003227	0.00452	0.004435
106.32	0.002072	0.002005	0.00223544	0.001711	0.00479344	0.003597	0.00473	0.004825
106.56	0.002592	0.001945	0.00242544	0.001591	0.00508344	0.003597	0.00444	0.004885
106.8	0.002222	0.002075	0.00212544	0.001721	0.00483344	0.003337	0.00456	0.004935
107.04	0.002632	0.001845	0.00227544	0.001761	0.00524344	0.003697	0.00433	0.004695
107.28	0.002822	0.001695	0.00217544	0.001861	0.00484344	0.003647	0.00461	0.005005
107.52	0.002282	0.001775	0.00239544	0.001771	0.00503344	0.003487	0.00437	0.004915
107.76	0.002342	0.001795	0.00230544	0.001691	0.00501344	0.003557	0.00462	0.004725
108	0.002432	0.002095	0.00244544	0.001741	0.00539344	0.003827	0.00464	0.004855
108.24	0.002192	0.002105	0.00237544	0.001411	0.00486344	0.003707	0.00443	0.004795
108.48	0.002802	0.001805	0.00226544	0.001561	0.00467344	0.003417	0.00472	0.005045
108.72	0.002282	0.002065	0.00228544	0.001611	0.00480344	0.003347	0.00444	0.004605
108.96	0.002542	0.001665	0.00245544	0.001481	0.00497344	0.003637	0.00455	0.004785
109.2	0.002482	0.001895	0.00211544	0.001531	0.00476344	0.003467	0.0044	0.004965
109.44	0.002542	0.001955	0.00232544	0.001691	0.00512344	0.003527	0.00425	0.004665
109.68	0.002432	0.001735	0.00225544	0.001821	0.00490344	0.003477	0.00459	0.004815
109.92	0.002632	0.001945	0.00211544	0.001801	0.00438344	0.003557	0.00435	0.004525
110.16	0.002432	0.001825	0.00236544	0.001541	0.00455344	0.003467	0.00429	0.004825
110.4	0.002532	0.001985	0.00213544	0.001541	0.00478344	0.003507	0.00431	0.004645
110.64	0.002502	0.001755	0.00199544	0.001551	0.00473344	0.003457	0.00458	0.004815
110.88	0.002442	0.001665	0.00227544	0.001461	0.00453344	0.003457	0.00442	0.004425
111.12	0.002692	0.001615	0.00209544	0.001961	0.00502344	0.003627	0.00415	0.004705
111.36	0.002222	0.001835	0.00220544	0.001641	0.00474344	0.003487	0.00426	0.004615
111.6	0.002542	0.001835	0.00230544	0.001481	0.00483344	0.003497	0.00447	0.004755
111.84	0.002582	0.001855	0.00221544	0.001751	0.00475344	0.003337	0.00433	0.004765
112.08	0.002662	0.001985	0.00240544	0.001671	0.00505344	0.003577	0.00431	0.004925
112.32	0.002522	0.002105	0.00205544	0.001571	0.00465344	0.003627	0.00433	0.004485
112.56	0.002292	0.001945	0.00228544	0.001721	0.00472344	0.003537	0.00439	0.004665
112.8	0.002112	0.001885	0.00249544	0.001541	0.00473344	0.003377	0.00445	0.004575
113.04	0.002512	0.001885	0.00221544	0.001801	0.00495344	0.003507	0.00443	0.004845
113.28	0.002322	0.001665	0.00212544	0.001681	0.00471344	0.003727	0.00428	0.004675
113.52	0.002282	0.001955	0.00208544	0.001471	0.00480344	0.003437	0.00441	0.004435
113.76	0.002682	0.001925	0.00215544	0.001591	0.00475344	0.003257	0.00451	0.004365
114	0.002472	0.001865	0.00221544	0.001661	0.00485344	0.003447	0.00446	0.004715
114.24	0.002422	0.001855	0.00210544	0.001641	0.00477344	0.003547	0.00448	0.004455
114.48	0.002492	0.001875	0.00239544	0.001291	0.00497344	0.003587	0.00433	0.004495
114.72	0.002272	0.001655	0.00200544	0.001661	0.00478344	0.003417	0.00435	0.004665
114.96	0.002272	0.002195	0.00223544	0.001601	0.00471344	0.003467	0.00459	0.004805
115.2	0.002302	0.001625	0.00216544	0.001461	0.00491344	0.003517	0.00443	0.004695
115.44	0.002472	0.001525	0.00207544	0.001581	0.00462344	0.003547	0.00431	0.004815
115.68	0.002242	0.001945	0.00211544	0.001611	0.00472344	0.003557	0.00436	0.004455
115.92	0.002422	0.002005	0.00193544	0.001601	0.00467344	0.003127	0.00466	0.004635
116.16	0.002502	0.001885	0.00225544	0.001651	0.00480344	0.003497	0.00428	0.004655
116.4	0.002272	0.001715	0.00215544	0.001441	0.00486344	0.003617	0.00449	0.004585
116.64	0.002402	0.001745	0.00237544	0.001781	0.00496344	0.003347	0.00468	0.004695
116.88	0.002422	0.001705	0.00220544	0.001601	0.00489344	0.003477	0.00443	0.004715
117.12	0.002192	0.001675	0.00216544	0.001611	0.00471344	0.003597	0.00468	0.004425
117.36	0.002012	0.001585	0.00236544	0.001801	0.00488344	0.003647	0.00484	0.004665
117.6	0.002222	0.001855	0.00230544	0.001731	0.00474344	0.003407	0.00483	0.004685
117.84	0.002182	0.001825	0.00238544	0.001331	0.00480344	0.003467	0.00429	0.004585
118.08	0.002232	0.001755	0.00217544	0.001451	0.00488344	0.003327	0.00446	0.004445
118.32	0.002302	0.001835	0.00238544	0.001681	0.00462344	0.003317	0.00438	0.004725
118.56	0.002322	0.001765	0.00242544	0.001651	0.00492344	0.003467	0.00433	0.004385
118.8	0.002692	0.001995	0.00194544	0.001631	0.00456344	0.003697	0.00437	0.004705
119.04	0.002352	0.001805	0.00214544	0.001641	0.00472344	0.003467	0.0044	0.004985
119.28	0.002282	0.001655	0.00212544	0.001851	0.00461344	0.003597	0.00466	0.004765
119.52	0.002562	0.001855	0.00219544	0.001391	0.00487344	0.003537	0.00452	0.004355
119.76	0.002492	0.001855	0.00026544	0.001771	0.00448344	0.003527	0.00459	0.004325
120	0.0134334	0.003767	0.012897	0.004003	-0.00144825	-0.00160264	-0.000321029	-0.00118056
120.24	0.0134123	0.003907	0.013187	0.004226	-0.0013441	-0.00164154	-0.000645848	-0.00146565
120.48	0.0139788	0.004042	0.013008	0.003796	-0.00141	-0.00147151	-0.000490198	-0.00117519
120.72	0.0139247	0.004051	0.013083	0.004209	-0.00179367	-0.00172152	-0.00036566	-0.00128657
120.96	0.0136354	0.004125	0.013003	0.004086	-0.000919632	-0.00172534	-0.000540322	-0.00164329
121.2	0.0136415	0.003917	0.012717	0.003761	-0.00175323	-0.00183248	-0.000620008	-0.00103916
121.44	0.0140029	0.003458	0.013107	0.004028	-0.00185543	-0.00140459	-0.000426942	-0.0017179
121.68	0.0137477	0.004027	0.012959	0.004077	-0.00184116	-0.00167771	-0.000575899	-0.00142537
121.92	0.0141317	0.003565	0.012836	0.004187	-0.00148613	-0.00174085	-0.000196925	-0.00175865
122.16	0.013614	0.003866	0.0131	0.003639	-0.00175571	-0.0016468	-0.000538092	-0.00143157
122.4	0.0138705	0.003828	0.012583	0.003663	-0.00158064	-0.00197659	-0.000689003	-0.00129781
122.64	0.0139734	0.003811	0.01303	0.003489	-0.00158832	-0.00180544	-0.000584218	-0.00139339
122.88	0.0137281	0.003838	0.012909	0.003807	-0.0015294	-0.00165184	-0.00069701	-0.00143226
123.12	0.0136857	0.003771	0.012962	0.004346	-0.00108998	-0.00188922	-0.000536618	-0.00142816
123.36	0.0137879	0.003875	0.0127	0.003629	-0.00150734	-0.00190762	-0.000723495	-0.00134236
123.6	0.013696	0.0038	0.01236	0.003917	-0.00153484	-0.00180371	-0.000433581	-0.00118321
123.84	0.0138743	0.003613	0.012848	0.003971	-0.00161422	-0.00196662	-0.000312584	-0.00100197
124.08	0.0137371	0.003495	0.012774	0.004351	-0.0015605	-0.00179858	-0.000116255	-0.00142539
124.32	0.0135715	0.003503	0.012707	0.004096	-0.00186187	-0.00193557	-0.000375108	-0.0016995
124.56	0.0140068	0.003614	0.012228	0.003648	-0.00186217	-0.00176258	-0.000472534	-0.00130355
124.8	0.0136141	0.003837	0.012898	0.004125	-0.00204905	-0.00179638	-0.0006229	-0.0015925
125.04	0.0136868	0.003735	0.012992	0.003359	-0.00139501	-0.00178534	-0.000750262	-0.000964619
125.28	0.0141679	0.003718	0.01296	0.003355	-0.00173562	-0.0019687	-0.000370079	-0.00158896
125.52	0.0140551	0.003697	0.012498	0.003989	-0.00166209	-0.00195566	-0.000484145	-0.00179941
125.76	0.0134932	0.003429	0.012599	0.003671	-0.00155613	-0.00168178	-0.000602686	-0.00127114
126	0.013942	0.003345	0.012735	0.003369	-0.00193573	-0.00193411	-0.000717784	-0.00169039
126.24	0.0135859	0.003768	0.012314	0.003582	-0.0018776	-0.00181412	-0.000717595	-0.00150856
126.48	0.0135121	0.003589	0.012854	0.004067	-0.00157888	-0.00176677	-0.000384371	-0.00143128
126.72	0.0137434	0.003332	0.012624	0.004035	-0.00169465	-0.00150598	-0.000557676	-0.00118371
126.96	0.0139001	0.003686	0.012622	0.003812	-0.00116044	-0.00204719	-0.000585816	-0.00126255
127.2	0.0136215	0.003665	0.012183	0.003832	-0.00151964	-0.00198679	-0.000499858	-0.00127562
127.44	0.0138028	0.003569	0.012704	0.003441	-0.0011472	-0.00158709	-0.000659759	-0.00116705
127.68	0.0138949	0.003587	0.012559	0.003814	-0.00135023	-0.00166184	-0.00054639	-0.00170813
127.92	0.0140549	0.00358	0.012676	0.003351	-0.0011075	-0.00162182	-0.000540043	-0.00165478
128.16	0.0135788	0.003528	0.012277	0.003804	-0.00143958	-0.00168729	-0.000387458	-0.00147768
128.4	0.0136086	0.003839	0.012283	0.003569	-0.00176299	-0.00176594	-0.000548685	-0.00166155
128.64	0.0137073	0.003533	0.012726	0.003699	-0.00147039	-0.00168837	-0.000427002	-0.00157683
128.88	0.0136446	0.003446	0.012146	0.003516	-0.00150356	-0.00197227	-0.000594859	-0.00142564
129.12	0.0136502	0.003575	0.012343	0.003534	-0.00182204	-0.00159088	-0.000477696	-0.00132526
129.36	0.0133156	0.00359	0.012064	0.003455	-0.0011516	-0.00177841	-0.000228363	-0.00160508
129.6	0.0138738	0.003631	0.012437	0.003856	-0.00156233	-0.00180575	-0.000420631	-0.00132878
129.84	0.0136554	0.003775	0.012221	0.003479	-0.00142431	-0.00152908	-0.000477311	-0.00128995
130.08	0.0132307	0.003121	0.012285	0.003665	-0.00168323	-0.00194445	-0.00074135	-0.00140743
130.32	0.0133452	0.003606	0.012642	0.003982	-0.00193413	-0.00166908	-0.000797241	-0.00102897
130.56	0.0137073	0.003542	0.012018	0.003347	-0.00144209	-0.00184138	-0.000585963	-0.00184462
130.8	0.0137893	0.002983	0.012202	0.003657	-0.00154573	-0.00201246	-0.000750173	-0.00153983
131.04	0.0136045	0.003412	0.012278	0.003557	-0.00141771	-0.0016525	-0.000493437	-0.00163235
131.28	0.0137688	0.003323	0.012116	0.003327	-0.00190346	-0.00183086	-0.000294437	-0.00119763
131.52	0.0135953	0.003389	0.0121	0.002983	-0.00137786	-0.0020275	-0.000648288	-0.00116595
131.76	0.0138904	0.003404	0.011984	0.003328	-0.00154828	-0.00189986	-0.000698151	-0.00181953
132	0.0136826	0.003259	0.01204	0.003234	-0.00150789	-0.0018242	-0.0007052	-0.00160751
132.24	0.0136353	0.003543	0.011881	0.003638	-0.00164989	-0.0019136	-0.000368414	-0.00163842
132.48	0.0132657	0.00324	0.012246	0.003388	-0.00179075	-0.00204093	-0.000734654	-0.00140666
132.72	0.013574	0.003062	0.012063	0.003053	-0.00152715	-0.00187674	-0.000670218	-0.00155094
132.96	0.0137868	0.00321	0.012134	0.003427	-0.00150727	-0.00216456	-0.000599156	-0.00180934
133.2	0.0135438	0.003519	0.011873	0.00344	-0.00161142	-0.00194886	-0.000464072	-0.00154618
133.44	0.0138039	0.003174	0.012114	0.003156	-0.00178093	-0.00176987	-0.000595088	-0.00130495
133.68	0.0133353	0.003452	0.012046	0.003383	-0.00141582	-0.00168981	-0.000670115	-0.00123022
133.92	0.0134624	0.003512	0.012277	0.00346	-0.00152786	-0.00194626	-0.000552893	-0.00134543
134.16	0.0134768	0.003254	0.012081	0.003742	-0.00153312	-0.00205497	-0.000520519	-0.0013234
134.4	0.0132567	0.003454	0.011855	0.003341	-0.0017783	-0.00225983	-0.000675926	-0.00134543
134.64	0.013728	0.003288	0.011747	0.003689	-0.00149001	-0.00206512	-0.000259533	-0.00127601
134.88	0.0133544	0.003247	0.011804	0.003282	-0.00148805	-0.00186117	-0.000761461	-0.00165806
135.12	0.0132572	0.003093	0.011962	0.003847	-0.00150766	-0.00212795	-0.000544977	-0.00123224
135.36	0.0137018	0.0033	0.011913	0.003387	-0.00228054	-0.00219418	-0.000369087	-0.00144313
135.6	0.013627	0.003268	0.01181	0.003671	-0.00145936	-0.00176877	-0.000935609	-0.00130326
135.84	0.0135358	0.003378	0.012059	0.003492	-0.00186207	-0.00199239	-0.000680677	-0.00141678
136.08	0.0133531	0.003511	0.011582	0.003174	-0.00226096	-0.00212102	-0.000921644	-0.00149749
136.32	0.0136101	0.003495	0.011746	0.00318	-0.00171057	-0.00178155	-0.000560046	-0.00153243
136.56	0.0137011	0.00317	0.011727	0.003347	-0.00137979	-0.00193742	-0.00066024	-0.00169031
136.8	0.0133735	0.003273	0.011999	0.003029	-0.00184474	-0.00182957	-0.000535223	-0.00142413
137.04	0.0131352	0.003239	0.011777	0.003224	-0.00188988	-0.00206628	-0.00018513	-0.00186326
137.28	0.013634	0.003107	0.011898	0.00275	-0.00157349	-0.00159367	-0.000608052	-0.00141856
137.52	0.0133472	0.003014	0.011439	0.003053	-0.00172178	-0.00182731	-0.000853358	-0.00151198
137.76	0.013365	0.003164	0.011414	0.002932	-0.00180871	-0.00188757	-0.000812171	-0.0013375
138	0.0134944	0.003039	0.011884	0.003445	-0.00174693	-0.00182583	-0.000623427	-0.00135162
138.24	0.0133289	0.003059	0.011415	0.003388	-0.00120031	-0.00201232	-0.000843456	-0.00151739
138.48	0.0136665	0.003293	0.0115	0.003525	-0.00200229	-0.00207981	-0.000479055	-0.00125402
138.72	0.0133113	0.002995	0.011851	0.00317	-0.00197594	-0.00179673	-0.000885862	-0.0019137
138.96	0.013379	0.003258	0.011638	0.003245	-0.00206446	-0.00182555	-0.000679691	-0.00140342
139.2	0.0130004	0.00328	0.011992	0.003001	-0.00162253	-0.0019243	-0.00038049	-0.00168314
139.44	0.0130983	0.00293	0.011315	0.003204	-0.00131561	-0.00186432	-0.000678551	-0.00131934
139.68	0.0131604	0.003207	0.011692	0.003457	-0.00178961	-0.00188131	-0.000531835	-0.0017158
139.92	0.0132077	0.003232	0.011378	0.003101	-0.00148657	-0.00216658	-0.000681287	-0.0011873
140.16	0.0133586	0.003152	0.011881	0.003559	-0.00192345	-0.00233508	-0.000448084	-0.00143662
140.4	0.0133224	0.002983	0.011973	0.003287	-0.00187708	-0.00181102	-0.000634881	-0.00151727
140.64	0.013353	0.003025	0.011347	0.003148	-0.00178326	-0.00201445	-0.000750102	-0.00137785
140.88	0.012661	0.002758	0.011543	0.002757	-0.00214616	-0.00210047	-0.000645419	-0.00157698
141.12	0.0134919	0.003169	0.011521	0.003164	-0.00155091	-0.00207646	-0.000739612	-0.00149957
141.36	0.013835	0.003098	0.01185	0.00315	-0.00171504	-0.00198694	-0.000311882	-0.00147466
141.6	0.0130441	0.002895	0.011514	0.002754	-0.00204682	-0.0018475	-0.000517127	-0.00165775
141.84	0.0132746	0.002949	0.011356	0.002933	-0.00179853	-0.00194184	-0.000892484	-0.00178525
142.08	0.0132538	0.002805	0.011687	0.003207	-0.00201179	-0.00192393	-0.000790962	-0.00164075
142.32	0.0130648	0.00293	0.011386	0.00285	-0.00214905	-0.00199464	-0.000737682	-0.00175521
142.56	0.0132836	0.003024	0.011496	0.002846	-0.00183261	-0.00206684	-0.000605598	-0.00175006
142.8	0.0131527	0.002988	0.011228	0.003096	-0.00221832	-0.00204284	-0.000823831	-0.00187756
143.04	0.0130823	0.003315	0.011128	0.002909	-0.00148004	-0.00198993	-0.000427533	-0.00185963
143.28	0.0132635	0.003033	0.011723	0.002809	-0.00192692	-0.00209639	-0.000865149	-0.00138343
143.52	0.0133116	0.003053	0.011063	0.003312	-0.00183409	-0.00239252	-0.000736745	-0.00125414
143.76	0.0129302	0.003049	0.010791	0.00267	-0.00164127	-0.00223595	-0.000596137	-0.00180595
144	0.0135367	0.002966	0.011441	0.003087	-0.00199856	-0.00186357	-0.000694552	-0.00165685
144.24	0.0127525	0.002984	0.011295	0.002631	-0.00204434	-0.0021234	-0.00080932	-0.00169297
144.48	0.0130568	0.002946	0.01149	0.002797	-0.00184744	-0.00221376	-0.00066425	-0.00162703
144.72	0.0132788	0.003243	0.01165	0.002581	-0.00174613	-0.00213054	-0.000537937	-0.00146745
144.96	0.0131275	0.003067	0.011474	0.002986	-0.00150359	-0.0021013	-0.000398639	-0.0014188
145.2	0.0132547	0.002995	0.011257	0.002971	-0.00156679	-0.00198731	-0.000518639	-0.00151682
145.44	0.0133457	0.002829	0.011257	0.003191	-0.00219953	-0.00201698	-0.000532259	-0.00173721
145.68	0.0129381	0.00297	0.010968	0.002927	-0.00201613	-0.00191133	-0.00084945	-0.00149667
145.92	0.0132662	0.003139	0.011307	0.002739	-0.00185243	-0.00215609	-0.000771202	-0.00178679
146.16	0.0129051	0.003053	0.011197	0.002879	-0.00136041	-0.00186389	-0.000518638	-0.00157099
146.4	0.013258	0.002822	0.011237	0.002708	-0.00206805	-0.00177665	-0.000754288	-0.00134184
146.64	0.012912	0.002847	0.011058	0.002939	-0.00154297	-0.00223385	-0.000721596	-0.00176245
146.88	0.0134822	0.002762	0.010428	0.002576	-0.00228088	-0.00213384	-0.0007137	-0.00172595
147.12	0.0131551	0.002732	0.011139	0.002672	-0.00215681	-0.00212046	-0.000772934	-0.00168681
147.36	0.0132299	0.002661	0.011406	0.003016	-0.00192223	-0.00215662	-0.000681911	-0.00161049
147.6	0.0131091	0.0028	0.010992	0.003309	-0.00202882	-0.00219279	-0.000755005	-0.0017562
147.84	0.0135763	0.002934	0.011263	0.002747	-0.00175995	-0.00210912	-0.0004656	-0.0016053
148.08	0.013416	0.003024	0.010922	0.002612	-0.00194583	-0.00216881	-0.000955073	-0.00191427
148.32	0.0131274	0.002581	0.010958	0.003089	-0.00190001	-0.00217672	-0.000650112	-0.00171295
148.56	0.013454	0.002923	0.011092	0.0026	-0.00202863	-0.00214153	-0.00065194	-0.00169126
148.8	0.0133331	0.002568	0.010901	0.002956	-0.0019303	-0.00210563	-0.000683147	-0.00170335
149.04	0.0130518	0.00249	0.011025	0.003083	-0.00156018	-0.00201596	-0.000671466	-0.00141847
149.28	0.0134092	0.002602	0.011089	0.002866	-0.00205229	-0.00198374	-0.00100903	-0.00181375
149.52	0.0130934	0.002713	0.011016	0.002941	-0.00131303	-0.0025273	-0.000769502	-0.00165646
149.76	0.0134348	0.002726	0.01064	0.002447	-0.00202556	-0.00215005	-0.000484135	-0.00167165
150	0.0132889	0.002764	0.010607	0.002757	-0.00208807	-0.00246076	-0.000583666	-0.00191241
150.24	0.0132487	0.002769	0.010647	0.002507	-0.00253872	-0.00216745	-0.000912287	-0.00180365
150.48	0.0129332	0.002871	0.011022	0.003186	-0.00196329	-0.00210731	-0.00104446	-0.0014192
150.72	0.013486	0.003031	0.011048	0.002698	-0.00206489	-0.00189897	-0.000893212	-0.00116807
150.96	0.0133052	0.003326	0.011254	0.003057	-0.00191236	-0.00204247	-9.93356e-05	-0.00131974
151.2	0.0135864	0.003432	0.010775	0.003651	-0.00168499	-0.00198599	-0.000731323	-0.00126606
151.44	0.0128322	0.003832	0.011216	0.003228	-0.00187889	-0.0018409	-0.000506039	-0.00130282
151.68	0.0133692	0.003793	0.011116	0.003858	-0.00175572	-0.00163988	-0.000571368	-0.0011317
151.92	0.0136274	0.003644	0.011188	0.003951	-0.00105513	-0.00140362	-0.000325472	-0.000724636
152.16	0.0137914	0.004215	0.011483	0.003951	-0.001055	-0.0012572	7.74322e-05	-0.000324939
152.4	0.0139036	0.003895	0.011541	0.004188	-0.000861186	-0.00148264	-0.000216133	-5.03123e-05
152.64	0.0139966	0.004628	0.011936	0.004184	-0.001279	-0.000947254	-0.000477738	0.00019923
152.88	0.0137092	0.004778	0.012056	0.004361	-0.000704313	-0.0009918	7.08553e-05	4.25496e-05
153.12	0.0138401	0.004863	0.011912	0.00478	-0.000458511	-0.000912973	-9.10705e-05	0.000197408
153.36	0.0143459	0.005013	0.012199	0.004993	-0.000600887	-0.000766753	-0.000252282	0.000629151
153.6	0.0142258	0.004997	0.0125	0.005327	-0.000177646	-0.000467361	0.000149892	0.00079206
153.84	0.0148784	0.005315	0.012501	0.005658	-6.21706e-05	-0.000231917	0.000362655	0.000562324
154.08	0.0144326	0.005712	0.012459	0.005907	0.000320692	-0.000553154	0.000188199	0.000800737
154.32	0.0143469	0.005611	0.012796	0.00547	0.000751633	-0.000243058	0.000193164	0.00099711
154.56	0.014249	0.005827	0.012745	0.006109	0.000284092	-0.000218112	0.00041714	0.00162979
154.8	0.0151081	0.00592	0.013026	0.006116	0.000508595	-0.00020919	0.000117477	0.00153399
155.04	0.015501	0.005651	0.013213	0.00643	0.000694658	0.000201277	0.000396329	0.0018728
155.28	0.0146988	0.006386	0.012986	0.00653	0.000624624	0.000301824	0.000751949	0.00156474
155.52	0.0155079	0.006285	0.013039	0.006686	0.00101393	0.000143488	0.000963023	0.00205922
155.76	0.015446	0.006365	0.013013	0.006856	0.00109128	0.000148743	0.000598306	0.00200895
156	0.0152974	0.006482	0.01335	0.006447	0.000671113	0.000656374	0.000986815	0.00217772
156.24	0.0149766	0.006465	0.013637	0.007004	0.00115895	0.000597008	0.000976541	0.00231601
156.48	0.0157877	0.006729	0.013078	0.006664	0.00154879	0.000673008	0.000803827	0.00232508
156.72	0.015371	0.006741	0.013509	0.007202	0.00121197	0.000886969	0.00140788	0.00246281
156.96	0.015568	0.006381	0.013843	0.007061	0.0013499	0.000866082	0.00121612	0.00220133
157.2	0.016095	0.006934	0.013012	0.006994	0.00152621	0.001184	0.00124312	0.00296486
157.44	0.0154743	0.007096	0.012889	0.007246	0.0018826	0.00101212	0.00090023	0.00259343
157.68	0.0159343	0.006769	0.013806	0.007835	0.00176652	0.000953626	0.00138175	0.00280563
157.92	0.0158082	0.007197	0.013837	0.007318	0.00182106	0.0012724	0.00137631	0.0031809
158.16	0.0162544	0.006962	0.013603	0.007931	0.00163204	0.00139712	0.00127493	0.00295689
158.4	0.0159111	0.006954	0.013854	0.00747	0.00218801	0.00120395	0.00109973	0.0032827
158.64	0.0160887	0.007262	0.013935	0.007337	0.00193714	0.00171018	0.00133746	0.00309875
158.88	0.0163123	0.007326	0.01407	0.007946	0.00191811	0.00127308	0.00168487	0.0031357
159.12	0.0162674	0.007284	0.013983	0.008205	0.002316	0.00136422	0.00185387	0.00379032
159.36	0.0160683	0.007349	0.013705	0.008228	0.00242513	0.00165607	0.00167863	0.00363021
159.6	0.0163265	0.007469	0.013926	0.008066	0.00259431	0.0016695	0.00154175	0.00341393
159.84	0.0165898	0.007358	0.013982	0.008585	0.00223312	0.00177967	0.00161232	0.00401123
160.08	0.0164099	0.007422	0.01421	0.008246	0.00192642	0.00162491	0.00193934	0.00398041
160.32	0.0161954	0.007915	0.013849	0.0083	0.00270976	0.00167152	0.00205469	0.0038801
160.56	0.0165337	0.008033	0.014038	0.00826	0.00270232	0.00179918	0.00208981	0.00412598
160.8	0.0168128	0.007699	0.014048	0.008578	0.00267528	0.00184589	0.00187874	0.00422507
161.04	0.0163012	0.007831	0.014276	0.00874	0.0026109	0.0019768	0.00203139	0.00395866
161.28	0.0168919	0.007856	0.014122	0.008735	0.0026432	0.00214835	0.00201875	0.00432874
161.52	0.0168457	0.007785	0.014353	0.008785	0.00273225	0.00202871	0.00189829	0.00413994
161.76	0.0164243	0.00788	0.013983	0.008782	0.00316339	0.00202116	0.00200551	0.00444458
162	0.0161951	0.007766	0.013966	0.008609	0.00291968	0.00203804	0.00210613	0.0043979
162.24	0.0166824	0.007745	0.014388	0.00898	0.00323407	0.00212086	0.00244806	0.00404336
162.48	0.0167399	0.007724	0.01425	0.008786	0.00343109	0.002085	0.0022461	0.00430521
162.72	0.01697	0.007858	0.014108	0.008542	0.00329824	0.00227439	0.00193802	0.00411521
162.96	0.017051	0.007988	0.0142	0.008908	0.0034937	0.00243272	0.00231067	0.00478656
163.2	0.0166868	0.00797	0.014556	0.008712	0.00312693	0.00234393	0.00279156	0.00453179
163.44	0.0171832	0.007902	0.014195	0.008799	0.00334489	0.00248229	0.00235062	0.00420993
163.68	0.0167941	0.007921	0.014	0.009243	0.00343011	0.00249322	0.00233263	0.00487457
163.92	0.0170878	0.008234	0.013674	0.009113	0.00393184	0.00255945	0.00246189	0.00462012
164.16	0.0169425	0.008258	0.014613	0.009372	0.00311123	0.00252777	0.00230711	0.00496617
164.4	0.0172836	0.008431	0.014124	0.008641	0.00391815	0.00252157	0.00227126	0.00486308
164.64	0.0172805	0.00804	0.014641	0.00952	0.0035613	0.00243593	0.00254807	0.00518599
164.88	0.0173183	0.00832	0.014145	0.009578	0.00383258	0.00250373	0.00221873	0.00466574
165.12	0.0173624	0.008349	0.01448	0.009324	0.00354241	0.00246662	0.00250532	0.00469013
165.36	0.0180442	0.008396	0.014352	0.009343	0.00368038	0.00273624	0.00256169	0.0052799
165.6	0.0167934	0.0083	0.014208	0.008827	0.00374187	0.00276338	0.00273787	0.00489466
165.84	0.0177487	0.00829	0.014439	0.009209	0.0033957	0.00252933	0.00244414	0.00492887
166.08	0.0171852	0.008107	0.014447	0.009231	0.00416523	0.00260507	0.00231381	0.00513217
166.32	0.0174808	0.008483	0.014411	0.009252	0.00343122	0.00306496	0.00258455	0.00544213
166.56	0.0173738	0.008192	0.014259	0.009524	0.00372484	0.00303235	0.00262775	0.00560399
166.8	0.0173112	0.008468	0.014164	0.009347	0.00377972	0.00289724	0.00245414	0.00545273
167.04	0.0174368	0.008306	0.014251	0.009408	0.00397688	0.00284829	0.00259412	0.00537642
167.28	0.017815	0.008666	0.014279	0.009618	0.00370472	0.00307301	0.0026046	0.00523214
167.52	0.0175247	0.008466	0.014275	0.009638	0.00363436	0.00305428	0.00237447	0.00533973
167.76	0.017471	0.00861	0.013968	0.009118	0.003815	0.00304768	0.0024104	0.00552234
168	0.0176277	0.008571	0.013964	0.009748	0.00353812	0.00308276	0.00301778	0.00529766
168.24	0.0177003	0.00875	0.014252	0.009752	0.00440795	0.00317642	0.0025811	0.00540899
168.48	0.0176976	0.008461	0.014169	0.009679	0.00434074	0.00313726	0.00262287	0.00559075
168.72	0.0179169	0.008528	0.014219	0.009601	0.00387689	0.00285217	0.00276	0.00548297
168.96	0.0175098	0.008484	0.014499	0.009331	0.00395286	0.00320523	0.00290849	0.00544362
169.2	0.0176909	0.008558	0.013899	0.009866	0.00391822	0.00333493	0.00310323	0.00564185
169.44	0.017913	0.008619	0.014007	0.009362	0.00411866	0.00313814	0.00266081	0.00550253
169.68	0.0177862	0.008702	0.014141	0.009294	0.0043423	0.0032141	0.00271431	0.00566803
169.92	0.0179331	0.008444	0.014181	0.009464	0.00450568	0.00313874	0.00299686	0.00600141
170.16	0.0181837	0.008624	0.014342	0.010274	0.00439639	0.00320686	0.00254323	0.00564561
170.4	0.0176317	0.008761	0.014023	0.010126	0.00446378	0.00318507	0.00245714	0.00599771
170.64	0.0176379	0.008743	0.014239	0.010044	0.00415687	0.00300188	0.00305557	0.00579592
170.88	0.0179009	0.008431	0.014147	0.009818	0.0037625	0.0031041	0.00250033	0.00557729
171.12	0.0181601	0.008917	0.014411	0.00989	0.00457637	0.00306253	0.00296983	0.00622477
171.36	0.0178299	0.008794	0.013862	0.009737	0.00427444	0.00354646	0.00267667	0.0058699
171.6	0.0178501	0.008804	0.014221	0.009626	0.00442263	0.00346755	0.00286967	0.00613981
171.84	0.0179743	0.008666	0.013791	0.010047	0.00410807	0.00335242	0.00314054	0.0062103
172.08	0.0180306	0.008619	0.014258	0.009887	0.00430761	0.00360536	0.00303954	0.00579836
172.32	0.0178372	0.008769	0.014479	0.009963	0.00407944	0.00343762	0.00284182	0.00562636
172.56	0.0181189	0.008778	0.014601	0.009745	0.0046461	0.00334923	0.00299175	0.00603167
172.8	0.0178411	0.008778	0.014092	0.009984	0.00442413	0.00307536	0.00323372	0.00635344
173.04	0.0182446	0.008944	0.014401	0.010042	0.00436506	0.00323385	0.00303179	0.00609478
173.28	0.0175848	0.008862	0.013821	0.01004	0.00460406	0.00327265	0.00316906	0.00597075
173.52	0.0179631	0.008822	0.014191	0.009774	0.00465979	0.00328301	0.0030494	0.00606352
173.76	0.0177594	0.008549	0.014195	0.010184	0.00431914	0.0035442	0.00318397	0.00614711
174	0.0178875	0.008775	0.013986	0.01037	0.0048416	0.00372559	0.00300445	0.00621375
174.24	0.0184709	0.008775	0.014149	0.009998	0.00463843	0.00345379	0.00309148	0.00597573
174.48	0.0182816	0.008861	0.014231	0.009868	0.00468172	0.0036523	0.0031589	0.00623901
174.72	0.0177133	0.00878	0.014517	0.010155	0.00464804	0.00396835	0.00322318	0.00657155
174.96	0.0182199	0.009248	0.014134	0.009947	0.00526157	0.0035099	0.00297473	0.00630092
175.2	0.0179163	0.009021	0.013976	0.01055	0.00500122	0.00344178	0.00331311	0.00634382
175.44	0.0177978	0.008501	0.014064	0.009922	0.00527753	0.00366841	0.00314917	0.00604954
175.68	0.0179845	0.009081	0.013699	0.010134	0.00440851	0.00350681	0.00353208	0.00640974
175.92	0.0180681	0.009074	0.013765	0.010565	0.00468418	0.00363087	0.00319908	0.0063673
176.16	0.0180496	0.008704	0.014117	0.010409	0.00503452	0.00391459	0.00309834	0.0065238
176.4	0.0176748	0.00888	0.014313	0.010172	0.00496406	0.0040092	0.00316616	0.00649542
176.64	0.0183541	0.009152	0.014334	0.01038	0.00474707	0.00373334	0.0032973	0.00623008
176.88	0.0180734	0.00904	0.014116	0.010444	0.00449106	0.0034581	0.00326686	0.00674791
177.12	0.0186483	0.008837	0.013909	0.010086	0.00468369	0.00395422	0.00334123	0.00637945
177.36	0.018055	0.009015	0.014166	0.010163	0.00484507	0.00367511	0.00328245	0.00634813
177.6	0.0183778	0.0092	0.014225	0.010501	0.0048959	0.00378882	0.00328978	0.00660243
177.84	0.0179144	0.00894	0.014041	0.010667	0.00507525	0.00370962	0.00335414	0.00691487
178.08	0.0181817	0.009057	0.013949	0.010371	0.00436644	0.00370456	0.00333227	0.00615037
178.32	0.0185792	0.0091	0.014201	0.01042	0.00479161	0.00381188	0.00346507	0.0066066
178.56	0.0180669	0.008779	0.013901	0.010057	0.00481536	0.00389855	0.00334732	0.00620959
178.8	0.0186465	0.009037	0.013721	0.01016	0.00519752	0.0038496	0.00310832	0.00663309
179.04	0.0181267	0.009397	0.013803	0.010774	0.00473988	0.00340267	0.00323831	0.00662625
179.28	0.0178917	0.008869	0.013533	0.010836	0.00471536	0.0038069	0.00344821	0.0066787
179.52	0.0180521	0.00911	0.014261	0.010665	0.00483201	0.00402394	0.00318873	0.00657443
179.76	0.0185462	0.009178	0.013973	0.010447	0.00470487	0.00379088	0.00350437	0.00667855
180	0.0184786	0.008952	0.014159	0.010227	0.00483269	0.00392705	0.00362679	0.00663505
180.24	0.0189221	0.008796	0.013892	0.010517	0.00507719	0.00398891	0.003523	0.00646188
180.48	0.0183285	0.009042	0.013818	0.010354	0.00541429	0.00369359	0.00349747	0.00644455
180.72	0.018051	0.008865	0.014022	0.01067	0.00526292	0.0040214	0.0035088	0.00690796
180.96	0.0182664	0.00881	0.013823	0.010229	0.00487083	0.00384694	0.00394106	0.00705108
181.2	0.01842	0.008891	0.013847	0.010271	0.00553973	0.00373504	0.00341717	0.00661232
181.44	0.0181829	0.009112	0.013867	0.010459	0.00513058	0.00411847	0.00356982	0.00687517
181.68	0.0189094	0.009021	0.013817	0.010388	0.00533139	0.0040412	0.00342994	0.0067111
181.92	0.0185358	0.008757	0.013901	0.010526	0.00536336	0.00392693	0.0032052	0.00686829
182.16	0.0180353	0.008876	0.013823	0.010384	0.00560732	0.00384546	0.00335331	0.00660339
182.4	0.0179712	0.008926	0.014043	0.010671	0.00525186	0.0036384	0.00332521	0.00707025
182.64	0.0183773	0.008873	0.013456	0.010576	0.00519595	0.00395685	0.00354496	0.00681652
182.88	0.018104	0.009201	0.013763	0.010679	0.00537079	0.00422475	0.0037729	0.00694593
183.12	0.0185087	0.008769	0.014137	0.010473	0.00516943	0.00388409	0.00331124	0.00688204
183.36	0.0180145	0.008888	0.013698	0.010377	0.00541574	0.00355584	0.00349923	0.00685791
183.6	0.018496	0.00909	0.01408	0.010637	0.00501358	0.00421458	0.00351075	0.00692522
183.84	0.018616	0.008893	0.013565	0.01044	0.0053652	0.00397143	0.00365313	0.00663086
184.08	0.0184403	0.009116	0.013901	0.011025	0.00523288	0.00376807	0.00347036	0.00689326
184.32	0.0186666	0.009004	0.013819	0.010662	0.00486995	0.0038131	0.00364004	0.0071265
184.56	0.0183282	0.008833	0.013842	0.01045	0.00520244	0.0038312	0.003587	0.00665068
184.8	0.0184862	0.00836	0.013671	0.010787	0.00536566	0.00409916	0.00359277	0.00721539
185.04	0.0183211	0.009163	0.013908	0.010778	0.00524355	0.00419034	0.00349821	0.00743092
185.28	0.0186305	0.008967	0.013579	0.01086	0.0050942	0.00421017	0.00389648	0.00699602
185.52	0.0186856	0.009112	0.013684	0.010774	0.00517601	0.00415387	0.00342151	0.00705906
185.76	0.0182667	0.009129	0.013764	0.010673	0.00541285	0.00411496	0.00353925	0.0068172
186	0.0187173	0.009156	0.013908	0.010447	0.00520124	0.00420591	0.00351588	0.00666328
186.24	0.0184866	0.00914	0.013522	0.010801	0.00529694	0.00390796	0.00319788	0.00709376
186.48	0.0187922	0.009354	0.013748	0.011062	0.00525722	0.0042962	0.00381493	0.00715513
186.72	0.0183611	0.008937	0.013905	0.010386	0.00527889	0.00399519	0.00389791	0.00729955
186.96	0.0186441	0.00947	0.013448	0.010939	0.00514607	0.00390983	0.00364751	0.00729961
187.2	0.0184441	0.008482	0.013541	0.010722	0.00533503	0.00387729	0.0033472	0.00691399
187.44	0.0185064	0.009216	0.013697	0.010966	0.00522903	0.00382771	0.00387817	0.00725311
187.68	0.0187243	0.009203	0.013326	0.010738	0.0053196	0.0042278	0.00348572	0.00716407
187.92	0.0188031	0.00884	0.013675	0.010228	0.00527057	0.00410213	0.003529	0.00685172
188.16	0.018865	0.008914	0.013972	0.010528	0.00583998	0.00407244	0.00355804	0.00691571
188.4	0.0185831	0.008845	0.013702	0.010564	0.00555999	0.00380795	0.00352951	0.00734995
188.64	0.0180855	0.009201	0.013751	0.010784	0.00538467	0.00384799	0.00359555	0.00708715
188.88	0.0185088	0.00887	0.01348	0.010904	0.00517188	0.00415797	0.00355951	0.00708447
189.12	0.0183895	0.008774	0.013523	0.01078	0.00491322	0.00374358	0.00365087	0.00726523
189.36	0.0180718	0.009152	0.013662	0.010697	0.00553561	0.00399622	0.00355895	0.00676004
189.6	0.0185139	0.009012	0.013706	0.010643	0.00586343	0.00410887	0.0037676	0.00712187
189.84	0.0186087	0.009226	0.013689	0.010929	0.00585645	0.00407613	0.0035133	0.00741878
190.08	0.0187009	0.008997	0.013617	0.010455	0.00520582	0.00393719	0.00336813	0.00712768
190.32	0.017905	0.009064	0.013831	0.010975	0.00568917	0.00408918	0.00371489	0.0072342
190.56	0.0178931	0.009297	0.013411	0.010854	0.00503696	0.00421113	0.00368825	0.00751317
190.8	0.0186554	0.009069	0.013765	0.01041	0.00563915	0.0042887	0.00377023	0.0073489
191.04	0.0188405	0.008738	0.014138	0.010917	0.00563268	0.00405655	0.00387441	0.0072961
191.28	0.0185046	0.00913	0.013757	0.010407	0.00599897	0.00419329	0.00389485	0.00728238
191.52	0.0187609	0.009175	0.013757	0.010748	0.00581571	0.004278	0.00375243	0.00722675
191.76	0.0179923	0.008729	0.013952	0.010724	0.0055959	0.00433325	0.00386129	0.00710369
192	0.0185762	0.008747	0.013963	0.010757	0.00582568	0.00412547	0.00364044	0.00721095
192.24	0.0184087	0.008896	0.013527	0.010853	0.00546044	0.00410302	0.0034644	0.00743155
192.48	0.0183605	0.008997	0.013832	0.01106	0.00551985	0.00431396	0.00390663	0.0073778
192.72	0.0186698	0.009119	0.013812	0.010995	0.00545006	0.00407568	0.00393422	0.00737842
192.96	0.0184857	0.009039	0.013596	0.010895	0.00549157	0.00420245	0.0038595	0.00712192
193.2	0.0181361	0.008971	0.013637	0.011103	0.00577586	0.00393486	0.00387171	0.00730658
193.44	0.0188533	0.009057	0.01364	0.01063	0.00571086	0.00433569	0.00325167	0.00737251
193.68	0.0187851	0.008661	0.013441	0.010578	0.00579078	0.00419344	0.0037331	0.00710908
193.92	0.0182816	0.009028	0.013462	0.011129	0.00563518	0.0045186	0.00381617	0.00726515
194.16	0.0189293	0.008705	0.013595	0.010887	0.0056176	0.00415708	0.00375172	0.00720971
194.4	0.0188334	0.008848	0.013581	0.010589	0.0055127	0.00403396	0.00381567	0.00751126
194.64	0.018813	0.009008	0.013763	0.010805	0.005816	0.00430565	0.00407692	0.00734832
194.88	0.0188574	0.009175	0.013774	0.010552	0.00557007	0.0042956	0.00373224	0.00708123
195.12	0.0183989	0.008849	0.013746	0.010927	0.00581031	0.00445501	0.0039358	0.00774517
195.36	0.0187221	0.00876	0.013822	0.010677	0.00606526	0.00456004	0.00363141	0.00701981
195.6	0.0186123	0.009099	0.013616	0.01049	0.0057139	0.00437125	0.00356571	0.00742835
195.84	0.0186015	0.008825	0.01363	0.011058	0.00576973	0.00405267	0.00409446	0.00719871
196.08	0.0184136	0.009231	0.013528	0.0111	0.00531495	0.00416558	0.00388127	0.00716659
196.32	0.0186979	0.008712	0.013706	0.011023	0.00542955	0.00440137	0.00390732	0.00728701
196.56	0.0188405	0.009	0.01359	0.011084	0.00550603	0.00424974	0.00372717	0.00727564
196.8	0.0187464	0.008936	0.013769	0.011053	0.00529361	0.00429004	0.00409112	0.00737828
197.04	0.0183976	0.009184	0.013546	0.010905	0.00560427	0.00422157	0.00390973	0.00741156
197.28	0.0186816	0.00909	0.013334	0.011138	0.00597403	0.00428548	0.00374331	0.00719605
197.52	0.0186274	0.008904	0.013652	0.010981	0.00582797	0.00422145	0.00395043	0.00730567
197.76	0.0185123	0.009063	0.013653	0.010686	0.00617114	0.00411404	0.00367021	0.00768464
198	0.0184853	0.009101	0.013305	0.011031	0.00610321	0.00433055	0.0036701	0.00765031
198.24	0.0187141	0.008486	0.013148	0.010935	0.00611212	0.00377669	0.00396933	0.00728584
198.48	0.0189408	0.009024	0.013704	0.011139	0.00573696	0.00425338	0.00408555	0.00732453
198.72	0.0187877	0.009104	0.013128	0.010728	0.00561917	0.00411364	0.00380324	0.0072086
198.96	0.0186474	0.008989	0.01379	0.010494	0.00548916	0.00393565	0.00413422	0.00712498
199.2	0.0187685	0.008954	0.01359	0.011012	0.00603452	0.00433928	0.00391829	0.00754509
199.44	0.0191451	0.0089	0.013579	0.01051	0.00554709	0.00429102	0.00404552	0.00741259
199.68	0.0190746	0.008888	0.01339	0.010982	0.00595303	0.00407519	0.00429303	0.00753343
199.92	0.01872	0.00873	0.013634	0.010723	0.00607378	0.00454333	0.00405511	0.00782909
200.16	0.0184777	0.008911	0.013667	0.01106	0.00613361	0.00426914	0.00386441	0.00788203
200.4	0.0185103	0.009131	0.013221	0.011749	0.00609481	0.00393999	0.00431922	0.00783626
200.64	0.0188236	0.009089	0.013396	0.010336	0.00568093	0.0041282	0.00393447	0.00765466
200.88	0.0186648	0.008697	0.013197	0.01093	0.00578173	0.00430589	0.00408577	0.00765575
201.12	0.0187478	0.008934	0.013431	0.011437	0.00605971	0.00442459	0.00399303	0.00749317
201.36	0.0188496	0.009013	0.01337	0.010807	0.00571664	0.00422764	0.0042635	0.00791522
201.6	0.0188586	0.00923	0.013206	0.010576	0.00627583	0.0045485	0.00395868	0.00745046
201.84	0.0188002	0.008735	0.013294	0.011106	0.00588945	0.00441157	0.00380885	0.00755247
202.08	0.0184964	0.008951	0.013714	0.010747	0.00580272	0.00406736	0.00435458	0.0077001
202.32	0.019003	0.009218	0.013135	0.010874	0.00585498	0.00420505	0.00410689	0.00769909
202.56	0.0185411	0.008785	0.013288	0.010471	0.00565309	0.00475071	0.00442635	0.00771477
202.8	0.0185625	0.008876	0.013507	0.010649	0.00567461	0.00432534	0.00381478	0.00795499
203.04	0.0183767	0.008952	0.013315	0.010613	0.00603015	0.00446276	0.00406065	0.00741243
203.28	0.0186944	0.008819	0.013407	0.010679	0.00585531	0.00444551	0.00436241	0.00773265
203.52	0.0183353	0.009024	0.013281	0.011333	0.00577477	0.00419438	0.00399841	0.00782158
203.76	0.01876	0.009015	0.013632	0.011071	0.00637352	0.00398037	0.00403439	0.00799907
204	0.0188663	0.00913	0.013472	0.011073	0.00596098	0.00414554	0.00428525	0.00767833
204.24	0.0187428	0.009179	0.013529	0.010558	0.00618589	0.00418109	0.00386084	0.00777553
204.48	0.0189902	0.008936	0.013356	0.01119	0.00601526	0.00430272	0.00398078	0.00751403
204.72	0.0188041	0.008924	0.013702	0.010968	0.0061422	0.00434603	0.00410886	0.00784141
204.96	0.0184144	0.009079	0.013314	0.010737	0.00597771	0.00462159	0.0035302	0.00754795
205.2	0.0192311	0.008729	0.012928	0.011049	0.00630139	0.00422604	0.00392735	0.00801934
205.44	0.0189153	0.009242	0.013238	0.011052	0.00575675	0.0043316	0.00420909	0.00778782
205.68	0.0192969	0.008806	0.013292	0.010323	0.00581447	0.00437481	0.00375555	0.00814417
205.92	0.0186096	0.008764	0.013545	0.010647	0.0060098	0.00425763	0.00440327	0.00760838
206.16	0.0186124	0.009238	0.013018	0.010306	0.00635772	0.00430023	0.00390386	0.0072399
206.4	0.0184525	0.009135	0.013328	0.010965	0.00609864	0.00454339	0.00404219	0.00742186
206.64	0.0184744	0.008674	0.013501	0.010866	0.00575546	0.00437765	0.00402022	0.0076929
206.88	0.0186614	0.008751	0.013493	0.010595	0.00602725	0.00445078	0.00430923	0.00784419
207.12	0.0185434	0.008883	0.013556	0.010911	0.00615437	0.00427921	0.00358868	0.00765629
207.36	0.018731	0.008482	0.01352	0.01075	0.00595074	0.00418056	0.00384601	0.00778634
207.6	0.0189377	0.008775	0.013148	0.01086	0.00582315	0.00399714	0.00410524	0.00771806
207.84	0.0187177	0.008619	0.013218	0.010537	0.00593859	0.00424308	0.00454587	0.00803779
208.08	0.0181846	0.009191	0.013348	0.01079	0.0056025	0.00407418	0.004228	0.00760442
208.32	0.0187785	0.008953	0.013065	0.011075	0.00615623	0.00427157	0.00461879	0.00785226
208.56	0.0187236	0.009005	0.013201	0.010648	0.00577803	0.00420175	0.00396966	0.00771264
208.8	0.0188307	0.009084	0.013531	0.01064	0.00618412	0.00410948	0.00428065	0.00757276
209.04	0.0184284	0.008912	0.013252	0.011076	0.00625582	0.0045126	0.00394988	0.00767208
209.28	0.0186097	0.009041	0.013393	0.010605	0.00552312	0.00430762	0.00437654	0.00773019
209.52	0.0186802	0.009235	0.013234	0.010573	0.00624125	0.00432507	0.0038764	0.00787129
209.76	0.0187804	0.008683	0.012805	0.010965	0.00606144	0.00425735	0.00421402	0.00844829
210	0.0184734	0.008946	0.013393	0.01101	0.00626992	0.00425173	0.00384657	0.00785717
210.24	0.0190589	0.008921	0.01314	0.011089	0.00582954	0.00443116	0.00415506	0.00737286
210.48	0.0183824	0.009046	0.013063	0.010482	0.00623312	0.00420499	0.00423602	0.00770447
210.72	0.0185453	0.008848	0.01294	0.011042	0.00606977	0.00436795	0.00425844	0.0077837
210.96	0.0182328	0.00895	0.013192	0.010945	0.00580996	0.00427964	0.00393206	0.00801612
211.2	0.0186078	0.00891	0.013369	0.010773	0.00605418	0.0042492	0.00421589	0.00759396
211.44	0.0183235	0.009156	0.013635	0.010924	0.00594494	0.00414816	0.00436338	0.0078417
211.68	0.0190369	0.009166	0.013297	0.010899	0.00590842	0.0042234	0.00408615	0.00759827
211.92	0.0188533	0.009216	0.013407	0.010348	0.00572488	0.00481167	0.00433747	0.00761438
212.16	0.018977	0.009034	0.013294	0.011057	0.00608698	0.00439418	0.00419124	0.00805414
212.4	0.0188799	0.008471	0.013111	0.011214	0.00602855	0.0043285	0.00397158	0.00818303
212.64	0.0188621	0.009017	0.013359	0.010916	0.0059037	0.00436857	0.00405098	0.00828703
212.88	0.0189613	0.008499	0.013202	0.01081	0.00635581	0.00436007	0.00440541	0.00744098
213.12	0.0184578	0.009158	0.013676	0.010716	0.00627824	0.00455663	0.00427855	0.00771216
213.36	0.0186293	0.009221	0.013419	0.010556	0.0066794	0.00417667	0.00402283	0.00766543
213.6	0.0190238	0.00912	0.013292	0.010684	0.00601653	0.00429366	0.00434024	0.00777718
213.84	0.0189883	0.009016	0.013376	0.010809	0.00621233	0.00437575	0.0047118	0.00762069
214.08	0.0189729	0.00869	0.013349	0.010622	0.00623235	0.00408419	0.00421296	0.00813429
214.32	0.019221	0.008515	0.013158	0.010648	0.00576724	0.00432737	0.00435956	0.00775715
214.56	0.0188181	0.009119	0.013403	0.010925	0.00621436	0.00422765	0.00408661	0.00776886
214.8	0.0189331	0.008653	0.013231	0.010249	0.00579104	0.00451109	0.0044113	0.00788786
215.04	0.0184744	0.008834	0.013353	0.010528	0.00643224	0.00421735	0.00390031	0.00746009
215.28	0.0187308	0.008869	0.012882	0.011055	0.00620538	0.00437659	0.00412705	0.00758497
215.52	0.0187453	0.008836	0.013182	0.010791	0.00602531	0.0042492	0.00417584	0.00800627
215.76	0.0187483	0.008735	0.013306	0.010885	0.00620484	0.00463032	0.00408239	0.0081947
216	0.0187683	0.00875	0.013232	0.010879	0.00627977	0.00428711	0.0042923	0.00795504
216.24	0.0191525	0.008656	0.01317	0.010895	0.0061167	0.00416718	0.00400441	0.00772823
216.48	0.0190703	0.00835	0.013224	0.010661	0.00565024	0.00458267	0.00425677	0.00806096
216.72	0.0187439	0.008587	0.012635	0.010817	0.00616298	0.00435364	0.00445646	0.00787742
216.96	0.0191968	0.008901	0.013147	0.011123	0.00640463	0.00447107	0.00413014	0.00772428
217.2	0.0187024	0.008832	0.013326	0.010902	0.00615614	0.00450495	0.00440722	0.00829499
217.44	0.019193	0.008741	0.013224	0.010827	0.0061283	0.00426266	0.00418001	0.00776583
217.68	0.0186641	0.008928	0.013119	0.010589	0.00609954	0.00442001	0.00419041	0.00770486
217.92	0.01867	0.008891	0.013191	0.011266	0.00628063	0.00459266	0.004182	0.00780031
218.16	0.0188738	0.008606	0.013485	0.010504	0.00629679	0.0042886	0.00434796	0.00814184
218.4	0.018894	0.00877	0.013205	0.011036	0.00614143	0.00426196	0.00428393	0.00765418
218.64	0.0186568	0.008544	0.013113	0.01097	0.0056197	0.00435548	0.00403632	0.00748059
218.88	0.0185904	0.008624	0.013251	0.011061	0.00629766	0.00437775	0.00436599	0.00814306
219.12	0.0189499	0.00876	0.012975	0.010847	0.00588897	0.00448927	0.00433322	0.00770548
219.36	0.0187456	0.009011	0.013395	0.011129	0.00623288	0.00441226	0.00413509	0.00770288
219.6	0.0189617	0.008853	0.01307	0.01057	0.00586653	0.00428772	0.00437401	0.00766533
219.84	0.0187317	0.008681	0.012722	0.011085	0.00608915	0.00416318	0.00403713	0.00785295
220.08	0.0190317	0.00886	0.013189	0.011228	0.00621045	0.00429626	0.00406932	0.00810086
220.32	0.0190605	0.008548	0.013087	0.010961	0.0060929	0.00399057	0.00412166	0.00812407
220.56	0.0187438	0.008371	0.013209	0.010452	0.00628672	0.00446565	0.00454749	0.00759488
220.8	0.0185494	0.009106	0.013142	0.010778	0.00596731	0.00462052	0.00418189	0.00770552
221.04	0.0187181	0.008678	0.01295	0.010664	0.00590754	0.00433117	0.00433317	0.00800599
221.28	0.0188213	0.008939	0.013399	0.01033	0.00633564	0.00419261	0.00428114	0.0079147
221.52	0.0189913	0.008583	0.013392	0.010702	0.00654216	0.00446921	0.00409639	0.00818668
221.76	0.0190753	0.008625	0.013117	0.010657	0.006369	0.00421387	0.00380546	0.00800407
222	0.0187712	0.008725	0.013224	0.010861	0.00620543	0.00452428	0.00428339	0.00745914
222.24	0.0189663	0.008524	0.013112	0.010842	0.00630772	0.00439907	0.00407803	0.00804684
222.48	0.0189899	0.008599	0.013017	0.010867	0.00642881	0.00439616	0.00443133	0.00807598
222.72	0.0189098	0.008694	0.013144	0.010549	0.00625452	0.00415392	0.00450063	0.00822509
222.96	0.0189523	0.008711	0.012791	0.010704	0.00622061	0.00432149	0.00421045	0.00782593
223.2	0.0188613	0.008645	0.013074	0.010575	0.00650831	0.00443216	0.00439606	0.00841444
223.44	0.0189284	0.008823	0.012762	0.011362	0.00609263	0.00430054	0.00433208	0.00817225
223.68	0.018419	0.00887	0.013362	0.010703	0.00594949	0.00431782	0.00439369	0.00756491
223.92	0.019026	0.008556	0.012766	0.011214	0.00599199	0.00425498	0.00431295	0.00831247
224.16	0.0191171	0.008787	0.013094	0.010767	0.00655629	0.00439705	0.00387635	0.00786562
224.4	0.0190154	0.008617	0.013006	0.010735	0.00661434	0.00449085	0.00419389	0.00799149
224.64	0.0189174	0.008777	0.012926	0.010829	0.00615974	0.00456771	0.00438718	0.00804266
224.88	0.0189316	0.008669	0.01291	0.011289	0.00599899	0.00418984	0.00464609	0.00777549
225.12	0.0190264	0.00874	0.013063	0.010541	0.00567348	0.00431586	0.00466472	0.00811027
225.36	0.0189202	0.008541	0.013066	0.010833	0.00611433	0.00429789	0.00442122	0.00824593
225.6	0.0188582	0.008724	0.01298	0.011044	0.00577545	0.00453575	0.00473102	0.00782928
225.84	0.0188663	0.008535	0.012852	0.010422	0.00624092	0.00418694	0.00430376	0.00805664
226.08	0.0187031	0.008977	0.01279	0.010923	0.00690992	0.0043116	0.00395547	0.00813121
226.32	0.0186459	0.008812	0.012815	0.010699	0.00607012	0.00413083	0.00437351	0.00788628
226.56	0.019034	0.008282	0.013062	0.011161	0.00611977	0.00438208	0.00437498	0.00807217
226.8	0.0191117	0.008563	0.012881	0.010827	0.0063027	0.00429662	0.00429946	0.00816691
227.04	0.018807	0.008737	0.013314	0.01087	0.00692016	0.00432375	0.00418391	0.00795715
227.28	0.0189048	0.008933	0.013319	0.01081	0.00609392	0.00443098	0.00449162	0.00805848
227.52	0.0190226	0.008617	0.013112	0.011208	0.00571234	0.00417562	0.00453044	0.00816677
227.76	0.0186898	0.008685	0.013078	0.010707	0.00649752	0.00422159	0.00433752	0.00773568
228	0.0190305	0.008647	0.013004	0.01031	0.00622784	0.00432934	0.00429433	0.00806071
228.24	0.0188707	0.008549	0.012723	0.010766	0.00614545	0.00454549	0.00436506	0.00824727
228.48	0.0187529	0.008299	0.012824	0.010619	0.00627148	0.00419406	0.00444797	0.00801654
228.72	0.0189125	0.008881	0.01313	0.010826	0.00618424	0.00441202	0.00447588	0.00813805
228.96	0.01873	0.008313	0.013003	0.010809	0.00603855	0.00463288	0.00478436	0.00833504
229.2	0.0187995	0.0084	0.013062	0.010894	0.00591827	0.00444764	0.00444987	0.00831982
229.44	0.0188384	0.008772	0.012837	0.010767	0.00628606	0.00466689	0.00434585	0.00842408
229.68	0.018857	0.008503	0.012852	0.010583	0.00638959	0.00428378	0.00457814	0.00826791
229.92	0.0185609	0.008701	0.01317	0.010446	0.00663852	0.00438092	0.00431282	0.00828223
230.16	0.018787	0.008722	0.012874	0.010922	0.00663429	0.00423028	0.00447991	0.00805399
230.4	0.0191939	0.008512	0.013355	0.010496	0.00666388	0.00477126	0.00449809	0.00823595
230.64	0.0188218	0.008461	0.013169	0.010669	0.0065349	0.00431167	0.00446955	0.00822416
230.88	0.0188877	0.008682	0.012759	0.011256	0.00652888	0.00420631	0.00409666	0.0080003
231.12	0.0188011	0.00883	0.012917	0.010767	0.00616408	0.00418041	0.00432646	0.00806732
231.36	0.0193333	0.008501	0.013141	0.010932	0.00607569	0.00430295	0.00410886	0.00839387
231.6	0.0192282	0.008289	0.012938	0.010618	0.00588009	0.00438453	0.00429986	0.00780995
231.84	0.018475	0.008778	0.012754	0.010552	0.00631325	0.00443953	0.0042767	0.00813162
232.08	0.0185306	0.008422	0.012898	0.01058	0.00631596	0.00466356	0.00410271	0.00797126
232.32	0.0184855	0.008643	0.012885	0.010617	0.00615008	0.00441105	0.00448664	0.00841488
232.56	0.0191795	0.008545	0.013104	0.010758	0.00648324	0.00416607	0.00463097	0.00780714
232.8	0.0188471	0.008554	0.01295	0.010569	0.00622336	0.00427749	0.0045415	0.0085071
233.04	0.0189586	0.008455	0.012889	0.010741	0.0061819	0.00432321	0.00449262	0.00798998
233.28	0.0189812	0.008407	0.012776	0.010823	0.00644635	0.00438475	0.00442146	0.00792025
233.52	0.0187867	0.008552	0.012962	0.010214	0.00616898	0.00409938	0.00446111	0.00822912
233.76	0.0190797	0.008396	0.012922	0.01076	0.00648734	0.00414496	0.00453701	0.00822325
234	0.0187471	0.008614	0.012886	0.010502	0.00634057	0.00431034	0.00465578	0.00842429
234.24	0.0189583	0.008634	0.013006	0.010627	0.00635327	0.00466688	0.00425811	0.00802112
234.48	0.0192042	0.008486	0.013197	0.010466	0.00657672	0.00433344	0.0045966	0.00778408
234.72	0.0182024	0.008534	0.012748	0.010985	0.00622394	0.00407327	0.00457911	0.00804296
234.96	0.0188904	0.008205	0.012981	0.010471	0.00606281	0.00443231	0.00447703	0.00825518
235.2	0.0189255	0.008665	0.012647	0.01021	0.00632848	0.00427173	0.00442486	0.00761582
235.44	0.0190874	0.008446	0.012644	0.010935	0.0060401	0.00438949	0.00458438	0.0078744
235.68	0.0193387	0.008517	0.012703	0.010467	0.00673167	0.00406997	0.00471578	0.00825212
235.92	0.0189335	0.008236	0.01312	0.010388	0.00624928	0.00411392	0.0045171	0.00832041
236.16	0.0187016	0.008581	0.012801	0.010246	0.00602642	0.0046148	0.00460387	0.00797476
236.4	0.0191204	0.008182	0.012901	0.010993	0.00673047	0.00416601	0.00440103	0.00813716
236.64	0.0188841	0.008484	0.012981	0.010722	0.00641971	0.00454104	0.00417582	0.00830205
236.88	0.0188384	0.007945	0.012829	0.01052	0.00649671	0.00431281	0.00457422	0.00817071
237.12	0.0187915	0.008562	0.01309	0.010668	0.0060686	0.00431423	0.00427009	0.0080012
237.36	0.0188685	0.008432	0.013111	0.0109	0.00609877	0.00424661	0.00454094	0.00824018
237.6	0.0191958	0.008268	0.013001	0.010988	0.00625222	0.00452457	0.00465408	0.00800326
237.84	0.0184724	0.008515	0.013045	0.010413	0.00633297	0.00419805	0.00472783	0.00814724
238.08	0.0187318	0.008456	0.012775	0.010659	0.00678677	0.00395184	0.0046201	0.00809694
238.32	0.0184474	0.008358	0.012985	0.011166	0.00639093	0.00432434	0.00466824	0.00817896
238.56	0.01904	0.008421	0.012837	0.010068	0.0064775	0.0043923	0.00459018	0.00777991
238.8	0.0188145	0.008536	0.012674	0.010875	0.00652482	0.00447745	0.00461833	0.00813147
239.04	0.0185947	0.008351	0.012775	0.011185	0.0067492	0.00401539	0.00459721	0.00789692
239.28	0.0191011	0.008476	0.012764	0.010651	0.00667282	0.00413084	0.00446149	0.00785588
239.52	0.018719	0.008495	0.01285	0.010381	0.0059759	0.00432202	0.00421631	0.00806357
239.76	0.0187562	0.008586	0.012761	0.010819	0.00604741	0.00431264	0.0039867	0.00781749

## Sheet: Bar Graph
	Nucleotide depleted				plus GTP
	Exp1	Exp2	Exp3	Exp4	Exp1	Exp2	Exp3	Exp4
GIV GBA	0.00468	0.00393	0.00621		0.00443	0.00333	0.0058
R12 GL	0.00353	0.00226	0.00385		0.0031	0.00161	0.00326
Control	0.00015	9e-05	-6e-05		-1e-05	0.0003	-0.00019
M4R	0.00236	0.00183	0.00233	0.00164	0.00483	0.00349	0.00454	0.00465
