# Supplementary material for: Complementary biosensors reveal different G-protein signaling modes triggered by GPCRs and non-receptor activators
Source: eLife. 2021 Mar 31;10:e65620. doi: 10.7554/eLife.65620 (PMC8034979; doi:10.7554/eLife.65620)
Supplement: Figure 5—source data 1. [file elife-65620-fig5-data1.xlsx]

## Sheet: Time traces
	Control				plus GIV				plus R12 GL
Time	Exp1	Exp2	Exp3	Exp4	Exp1	Exp2	Exp3	Exp4	Exp1	Exp2	Exp3	Exp4
0	0.00018	0.00013	3e-05	5e-05	-2e-05	8e-05	0.00022	-0.00036	-0.0002	-4e-05	-8e-05	-0.00011
0.24	0.00021	-6e-05	0	-3e-05	-8e-05	1e-05	0.00021	5e-05	-0.00017	-0.00013	0.00013	1e-05
0.48	0.00012	0.00017	0.00012	0.00019	-0.0002	0.00013	9e-05	-0.00011	9e-05	-0.00016	-7e-05	-5e-05
0.72	-0.0001	-3e-05	0.00017	0.00015	-0.00012	6e-05	-8e-05	0.00037	-0.00022	-1e-05	4e-05	-8e-05
0.96	0.0001	-9e-05	3e-05	0.00012	0.00012	0.00012	8e-05	0.00014	0.00019	-9e-05	2e-05	1e-05
1.2	0.0001	0	-4e-05	-6e-05	0.00013	-0.00013	0.00013	0.00022	4e-05	-2e-05	4e-05	5e-05
1.44	0.00011	0.00016	-9e-05	0.00016	-5e-05	2e-05	0.00021	-0.00012	-8e-05	-5e-05	7e-05	0.00012
1.68	-1e-05	4e-05	-9e-05	-1e-05	-2e-05	-2e-05	-7e-05	1e-05	0.00027	-0.0002	-1e-05	7e-05
1.92	-0.0001	-0.00014	1e-05	-0.00022	6e-05	9e-05	0.00029	8e-05	-0.00012	8e-05	0.00017	3e-05
2.16	7e-05	0.00012	7e-05	-0.00014	-6e-05	-1e-05	0.00029	4e-05	-6e-05	-0.00019	6e-05	4e-05
2.4	2e-05	0.00011	6e-05	-4e-05	5e-05	2e-05	4e-05	0.00014	-0.00018	0.00028	0.0002	-0.00031
2.64	-0.00017	-0.00014	7e-05	-2e-05	-8e-05	-8e-05	0	2e-05	0.00021	-8e-05	0.00022	0.0002
2.88	0.0001	-0.00013	-3e-05	-5e-05	0.00031	-7e-05	-0.00022	0	1e-05	0.0001	7e-05	0.00025
3.12	0.00019	8e-05	2e-05	0.00031	-6e-05	-8e-05	2e-05	0.00012	-3e-05	5e-05	2e-05	6e-05
3.36	7e-05	0.00021	-0.00013	8e-05	8e-05	-0.00017	-9e-05	0.0001	0.00019	-8e-05	0.00011	-8e-05
3.6	9e-05	-5e-05	-6e-05	-0.00013	5e-05	0.00011	7e-05	-4e-05	-6e-05	-0.00022	0.00028	2e-05
3.84	-9e-05	0.00012	-0.00019	-0.00011	-4e-05	8e-05	0.00013	-5e-05	-0.00012	-2e-05	-3e-05	-0.00017
4.08	8e-05	0.00023	-0.00027	7e-05	4e-05	-0.00011	-1e-05	6e-05	0.00011	-0.00023	3e-05	-3e-05
4.32	0.00022	0.00023	5e-05	3e-05	1e-05	0.00014	0.00013	-0.00016	-0.00022	-0.00021	-5e-05	-0.00012
4.56	-0.00017	5e-05	0.00013	0.00012	6e-05	-4e-05	-4e-05	0.00014	6e-05	0.00029	8e-05	0.00011
4.8	-0.00015	4e-05	-2e-05	-4e-05	9e-05	-5e-05	6e-05	-0.00014	0.00014	-0.00027	0	0.00023
5.04	-0.00027	1e-05	-0.00016	2e-05	0.00015	-0.00018	-7e-05	0.00011	0.00013	-1e-05	-0.00023	6e-05
5.28	-1e-05	4e-05	0.0001	0.00015	-3e-05	-0.00023	0.00023	6e-05	2e-05	-0.00027	1e-05	-5e-05
5.52	0	7e-05	-0.00023	0.00011	2e-05	-4e-05	1e-05	0.00012	9e-05	-1e-05	-0.00017	-0.00021
5.76	-0.0002	0.0002	0.00011	-3e-05	-0.00016	6e-05	1e-05	8e-05	0	-2e-05	-2e-05	0.00018
6	2e-05	-5e-05	-6e-05	-0.00015	8e-05	-3e-05	0.00013	-0.00011	-0.0001	-0.00022	-3e-05	-0.00015
6.24	-0.00015	0.00017	0.00018	0.00015	-8e-05	0.0001	5e-05	-8e-05	-0.00011	-0.00014	-0.0001	-0.00011
6.48	-0.00014	-3e-05	0.00015	0.00011	8e-05	0	-0.00026	-6e-05	0.00011	0.00026	-3e-05	-0.00023
6.72	9e-05	-0.00013	4e-05	-7e-05	-0.00011	-5e-05	-2e-05	-0.00013	6e-05	-8e-05	0.00017	-9e-05
6.96	-5e-05	-6e-05	-7e-05	2e-05	6e-05	5e-05	-5e-05	8e-05	1e-05	0.00018	3e-05	0.0001
7.2	-0.00023	3e-05	-0.00016	-0.00027	0.00012	2e-05	3e-05	0.00011	-7e-05	0.00032	-8e-05	0.00014
7.44	-8e-05	-0.0001	-7e-05	-0.00013	-0.00018	-1e-05	-0.00018	5e-05	-9e-05	0.00027	5e-05	0.0001
7.68	5e-05	9e-05	7e-05	0.0003	0.00011	2e-05	-6e-05	-0.00015	-4e-05	-0.00021	-0.00026	-0.0001
7.92	0.00011	-0.00016	0.00015	6e-05	0.0001	2e-05	4e-05	3e-05	0.00013	3e-05	3e-05	0.0003
8.16	-6e-05	-8e-05	-0.00016	-5e-05	-0.00014	-1e-05	-2e-05	-0.00015	6e-05	3e-05	-0.00016	0
8.4	-0.00022	0.0002	0.00011	0.00015	0.00019	-2e-05	0.00021	1e-05	-2e-05	-1e-05	-5e-05	0.00019
8.64	0	2e-05	7e-05	-8e-05	0	-0.0001	0.00013	1e-05	4e-05	4e-05	0.00021	-3e-05
8.88	-0.00011	-0.00012	6e-05	0.00015	9e-05	2e-05	-8e-05	-0.00013	3e-05	-1e-05	-7e-05	0.00022
9.12	0.00013	3e-05	0.00013	0.00022	-0.00014	0.00013	0.00011	-6e-05	0.0001	-8e-05	1e-05	-0.00028
9.36	-5e-05	5e-05	5e-05	-0.0002	2e-05	1e-05	0.0002	6e-05	-0.00016	-5e-05	-1e-05	0.00026
9.6	0.00011	-2e-05	-6e-05	0.00019	0	5e-05	3e-05	2e-05	3e-05	0.00013	0.00016	-0.00011
9.84	-9e-05	-2e-05	-0.00012	-9e-05	-0.00015	8e-05	0.00014	0.00014	0	1e-05	0.00014	-5e-05
10.08	-0.00016	-0.00016	-0.00015	-1e-05	-5e-05	0.00011	6e-05	-0.00019	0.00021	0.00027	0.00011	-9e-05
10.32	0	-0.0001	-0.00017	9e-05	0.00021	-0.00017	-0.00012	6e-05	2e-05	6e-05	-0.00015	-1e-05
10.56	-1e-05	9e-05	2e-05	0.00021	-6e-05	1e-05	-3e-05	0.00022	-2e-05	5e-05	-8e-05	0
10.8	-0.00014	-0.0001	-9e-05	-0.00023	7e-05	-2e-05	0.00011	-1e-05	0.00017	-0.00018	0.00016	0.00011
11.04	-0.00014	-7e-05	-6e-05	-5e-05	0	0	-0.00011	-0.00017	-2e-05	-2e-05	6e-05	0.00013
11.28	0.00016	-3e-05	0.00015	-0.00016	-0.00031	-0.00012	-0.00019	-9e-05	-8e-05	-0.00013	0.0001	-8e-05
11.52	-0.00014	9e-05	0.0002	-3e-05	-6e-05	0.0001	-0.0001	7e-05	0.00011	0.00028	1e-05	2e-05
11.76	-0.00016	-0.00012	-0.00018	0.00023	0.0001	-1e-05	-5e-05	0.00015	7e-05	0.0003	-4e-05	3e-05
12	9e-05	-0.00032	-9e-05	-0.00017	1e-05	0.00017	-0.00022	5e-05	2e-05	9e-05	3e-05	-0.00018
12.24	-0.00015	-5e-05	0.00023	5e-05	6e-05	0.00011	-2e-05	-0.00015	-7e-05	-3e-05	0.00011	0.00019
12.48	0.00017	-2e-05	0.00025	4e-05	0.00025	-0.00016	-6e-05	0.00025	-9e-05	0.00015	0.00015	-0.00016
12.72	0.00016	-5e-05	-9e-05	-0.00015	-1e-05	4e-05	-1e-05	-0.00015	0.00023	-7e-05	0.0001	0.00028
12.96	0.00023	0.00011	-0.00015	4e-05	-0.00014	0	-0.00011	0.00027	-2e-05	-0.00013	-7e-05	0.00016
13.2	-0.00015	-5e-05	5e-05	-3e-05	5e-05	-9e-05	0.00021	-7e-05	-6e-05	-1e-05	0.00011	-0.00023
13.44	0.00012	-0.00018	-7e-05	0.00014	-9e-05	-9e-05	0.00017	0.00014	5e-05	0.00011	-4e-05	7e-05
13.68	-0.00017	-6e-05	-1e-05	0.00019	-0.00024	-6e-05	0.00012	0.00028	9e-05	0.00013	5e-05	-8e-05
13.92	4e-05	0.00023	0.00016	-5e-05	-2e-05	0.00013	9e-05	7e-05	0.00013	-6e-05	0.00014	-0.00027
14.16	8e-05	-0.00015	1e-05	-5e-05	-9e-05	-7e-05	0.0001	-0.00016	0.00014	-0.00027	7e-05	-2e-05
14.4	-7e-05	0.0002	2e-05	0.00015	-4e-05	-8e-05	-0.00016	0	-5e-05	0.0002	-5e-05	-0.00012
14.64	-0.0001	0.00019	-0.00026	5e-05	2e-05	-0.00015	-6e-05	1e-05	2e-05	0.00011	-8e-05	4e-05
14.88	-0.00023	5e-05	0.00018	-0.00015	-1e-05	-7e-05	0.00016	-2e-05	5e-05	5e-05	5e-05	0.00013
15.12	0.00023	-5e-05	-0.00026	5e-05	0.00017	-4e-05	0.00013	0.00015	-0.0002	0.00034	-3e-05	0.00026
15.36	0.00018	-1e-05	9e-05	-1e-05	-0.0002	-0.00012	-8e-05	7e-05	-1e-05	0.00013	-0.00029	8e-05
15.6	0.00036	0	-3e-05	1e-05	-0.00012	0.00014	-0.00016	-0.00011	-7e-05	3e-05	-0.00012	0.00027
15.84	4e-05	-0.0001	-0.00013	4e-05	0.00014	-5e-05	5e-05	0.00016	-0.00026	-0.00014	0.00011	-3e-05
16.08	-5e-05	-6e-05	0	0.00014	-0.00013	6e-05	-1e-05	0.00036	0.00024	6e-05	-0.00013	0.00011
16.32	6e-05	2e-05	-0.00017	-2e-05	0.00013	-0.00015	7e-05	-0.00013	4e-05	0.00019	-0.00011	2e-05
16.56	0.00017	0.00018	0	-4e-05	0.0001	1e-05	0.00028	0.00012	1e-05	0	-5e-05	-0.00012
16.8	-8e-05	0.00011	-7e-05	-0.00019	8e-05	1e-05	-0.00018	0	7e-05	0.00026	-7e-05	-2e-05
17.04	0.00023	-0.00019	0.00024	2e-05	2e-05	0.00019	0.0001	-1e-05	-0.00011	-0.00016	-0.00014	3e-05
17.28	0.00016	-3e-05	2e-05	-0.0001	-8e-05	9e-05	-3e-05	-6e-05	6e-05	-0.00013	-7e-05	-9e-05
17.52	4e-05	0.00021	-0.00014	6e-05	3e-05	0.00021	-5e-05	-4e-05	0.00012	-0.00016	3e-05	-0.00024
17.76	0	0.0001	0.00021	0.00039	0.00019	0.00014	-0.00016	0.00014	1e-05	1e-05	3e-05	-0.0001
18	6e-05	-0.00019	0.00018	-0.00014	-0.0002	7e-05	3e-05	-0.00035	-9e-05	4e-05	8e-05	7e-05
18.24	-1e-05	-0.00014	0.00016	1e-05	-0.00018	-0.00024	-0.00021	4e-05	-0.00012	0.00022	4e-05	-3e-05
18.48	1e-05	-5e-05	-5e-05	0.00015	0.00013	-4e-05	-6e-05	-0.00011	0	-7e-05	4e-05	-1e-05
18.72	-6e-05	-0.00026	-7e-05	8e-05	-3e-05	-0.00021	2e-05	-0.00014	0.0001	5e-05	-7e-05	0
18.96	-7e-05	-0.00011	-0.00018	-0.00015	-0.00011	-6e-05	-0.00015	3e-05	-1e-05	-0.00018	9e-05	-6e-05
19.2	0.00016	0.00011	5e-05	0	4e-05	7e-05	1e-05	-0.00016	-2e-05	4e-05	-0.00013	4e-05
19.44	5e-05	3e-05	-5e-05	5e-05	0.00026	-0.00018	-0.00013	0.00017	-5e-05	-3e-05	9e-05	-9e-05
19.68	-3e-05	-0.00012	-0.00011	9e-05	4e-05	-9e-05	-6e-05	-1e-05	-2e-05	-0.00012	0.00019	6e-05
19.92	-5e-05	0.00011	0.00013	-4e-05	-0.00014	0.00011	0	-5e-05	-0.00019	-0.00023	0.00024	-0.00012
20.16	-0.00016	-8e-05	4e-05	-2e-05	-8e-05	6e-05	-4e-05	-0.00024	-2e-05	-5e-05	-8e-05	-0.00011
20.4	-6e-05	-4e-05	0.00019	-9e-05	0.0002	-1e-05	0.00013	-2e-05	2e-05	-8e-05	-3e-05	1e-05
20.64	0.00013	-0.0001	1e-05	-4e-05	9e-05	-0.00014	6e-05	4e-05	-7e-05	1e-05	8e-05	-7e-05
20.88	0	7e-05	-0.00018	-0.00017	-0.00014	-0.00012	1e-05	7e-05	9e-05	-3e-05	0.0001	-0.00014
21.12	5e-05	-6e-05	8e-05	2e-05	-0.00012	0	-7e-05	-0.00018	0.00011	-3e-05	-0.0002	-0.00015
21.36	3e-05	-0.00018	-0.00011	-4e-05	0.00014	2e-05	-0.00015	-8e-05	0.00017	0.00019	-9e-05	-3e-05
21.6	1e-05	0.00015	0.00031	-2e-05	4e-05	-1e-05	0.00015	-0.00021	0	-0.00012	1e-05	0.00056
21.84	4e-05	-0.0003	3e-05	-4e-05	3e-05	8e-05	-5e-05	-5e-05	1e-05	5e-05	-9e-05	0.00017
22.08	0.0001	1e-05	9e-05	-0.00014	-0.00011	-0.00022	-4e-05	3e-05	2e-05	4e-05	0	4e-05
22.32	8e-05	8e-05	-0.00029	-0.00023	-0.00018	0.00011	-5e-05	3e-05	6e-05	-0.00015	6e-05	0.0002
22.56	-7e-05	8e-05	0.00012	-0.00041	-2e-05	-0.0001	6e-05	0.00017	0	-3e-05	-0.00011	3e-05
22.8	-5e-05	1e-05	7e-05	-7e-05	-4e-05	0.0003	-7e-05	0.00013	4e-05	-8e-05	-8e-05	0.00012
23.04	-0.00021	0.00012	-6e-05	-6e-05	5e-05	6e-05	-0.00013	5e-05	0.00012	-2e-05	5e-05	9e-05
23.28	-0.00016	1e-05	-0.00023	-0.00012	-7e-05	3e-05	-0.00024	-5e-05	0.00024	-1e-05	-6e-05	0.00029
23.52	8e-05	-2e-05	-0.00025	0	0	-0.00023	0.00012	9e-05	-0.00017	3e-05	-0.00011	-0.00016
23.76	0.00017	0.00021	4e-05	-5e-05	0.0001	0.0002	-0.00016	-0.00012	6e-05	-5e-05	3e-05	-0.00019
24	0.00013	0	-8e-05	0.00018	-0.00011	-0.00015	-5e-05	6e-05	-0.00024	-2e-05	-0.00027	0
24.24	-7e-05	7e-05	-0.00012	0.00026	0.00016	-3e-05	8e-05	-0.0001	-2e-05	0.00013	-0.00014	-0.00028
24.48	-5e-05	-1e-05	-8e-05	0.00015	-0.00012	0.00019	-0.00023	8e-05	2e-05	0.00027	0	4e-05
24.72	-9e-05	-0.00028	8e-05	6e-05	-4e-05	0.0001	-3e-05	-4e-05	-9e-05	0.00013	-1e-05	-0.00028
24.96	-4e-05	-0.00014	-0.00014	-7e-05	2e-05	-4e-05	0.00031	-8e-05	-0.00011	0.00021	-0.00017	4e-05
25.2	0.00017	0.00012	0.0001	5e-05	5e-05	0.00016	-0.00022	-0.00036	0.00016	-3e-05	2e-05	-6e-05
25.44	-0.00022	-7e-05	0.00036	-6e-05	-8e-05	6e-05	-0.00015	3e-05	0	-0.00025	-1e-05	-0.00017
25.68	0.00016	0	-0.00025	0	-0.00014	-5e-05	-9e-05	-5e-05	-0.00022	-8e-05	2e-05	4e-05
25.92	-9e-05	-0.00013	0.00029	-0.0002	-0.00012	0.00015	0.00014	8e-05	1e-05	0.00014	0	5e-05
26.16	-1e-05	3e-05	8e-05	-2e-05	7e-05	4e-05	-3e-05	-0.00022	0	0.00016	6e-05	1e-05
26.4	-7e-05	9e-05	0.00012	-7e-05	-6e-05	2e-05	-0.00016	-0.00015	1e-05	0.00019	-9e-05	0.00011
26.64	3e-05	0.0001	-5e-05	-3e-05	0.00013	0.00019	0.00016	5e-05	-0.00012	-6e-05	-0.00032	-5e-05
26.88	-0.00028	-4e-05	-5e-05	0.00017	0	-1e-05	-9e-05	-0.00013	-0.0001	-0.00015	0	-0.00036
27.12	3e-05	1e-05	0.00016	8e-05	-0.00012	-0.00018	-5e-05	-0.00016	-0.00012	0.00034	1e-05	2e-05
27.36	3e-05	4e-05	-2e-05	-3e-05	0.0001	8e-05	0.00018	-0.00016	-0.0001	-5e-05	-9e-05	0.00013
27.6	0.0002	-0.0001	0.00026	-6e-05	0.00013	-0.00011	-0.00012	0.00021	-1e-05	-1e-05	6e-05	-3e-05
27.84	5e-05	0.00016	8e-05	-0.00013	9e-05	0.00023	-0.00023	9e-05	-0.00012	-0.00016	-0.0001	-9e-05
28.08	-0.00013	7e-05	-9e-05	-0.0002	-0.00011	4e-05	0.00013	-7e-05	-4e-05	-0.00034	0.00016	0.00019
28.32	-0.00028	3e-05	-0.00025	0.00013	0.00017	-0.00015	-9e-05	-0.00015	9e-05	-0.00015	6e-05	-0.00014
28.56	-9e-05	-0.00018	0	-0.00014	-5e-05	6e-05	4e-05	-1e-05	-0.00026	-0.00014	-2e-05	-0.00018
28.8	0.00017	3e-05	0	-0.0001	4e-05	-4e-05	-0.00025	0.00027	0.00011	0.00011	-1e-05	0
29.04	0.00012	-0.00025	-5e-05	-2e-05	6e-05	0.00012	0.00013	0.00018	0.00015	-6e-05	-3e-05	0.00028
29.28	0.00019	-0.00017	-0.00016	-0.00011	3e-05	0	-2e-05	6e-05	9e-05	0.00015	-0.00014	-8e-05
29.52	-8e-05	-0.00015	0	6e-05	-5e-05	0.00026	1e-05	0.00012	7e-05	0.00016	0	0.0003
29.76	-0.0001	-7e-05	-0.00025	7e-05	-3e-05	-5e-05	-0.00033	0.00013	9e-05	0	-6e-05	-0.0001
30	0.00021	0.00025	-7e-05	0.00015	0.00012	0.0003	0.00026	0.00038	2e-05	0.00019	-1e-05	0.00025
30.24	0.0003	0.00011	0.0002	0.00023	0.00027	0.00059	0.00027	0.00027	0.00037	0.00038	0.00018	0.00032
30.48	0.00051	0.0004	0.00045	0.00073	0.00048	0.00047	0.00039	0.00037	0.00045	0.00021	0.00032	0.0003
30.72	-0.00525	-0.00574	-0.00576	-0.00633	-0.00551	-0.006	-0.00632	-0.00575	-0.00571	-0.00616	-0.00566	-0.00648
30.96	-0.03113	-0.0338	-0.03296	-0.03723	-0.03396	-0.03652	-0.03626	-0.03527	-0.03423	-0.03599	-0.03553	-0.03804
31.2	0.01366	0.01504	0.01417	0.01268	0.01019	0.01195	0.01089	0.01598	0.01074	0.0119	0.01057	0.01228
31.44	-0.00999	-0.00901	-0.01038	-0.01212	-0.01116	-0.01215	-0.01192	-0.011	-0.01105	-0.01191	-0.01164	-0.01242
31.68	0.00106*	0.00408*	0.00112*	0.00138*	0.0013	0.00119	0.00131	0.00093	0.00123	0.00091	0.00138	0.00079
31.92	0.00097	0.00095	0.00123	0.00134	0.00127	0.00104	0.00136	0.00103	0.00111	0.0011	0.00165	0.00115
32.16	0.00091	0.00124	0.00121	0.00142	0.00125	0.00146	0.00135	0.00082	0.00129	0.00119	0.00154	0.00094
32.4	0.00143	0.00132	0.0014	0.00128	0.00184	0.00153	0.00143	0.00107	0.00144	0.0012	0.00165	0.00094
32.64	0.00111	0.00144	0.0014	0.00139	0.00142	0.00135	0.00156	0.00116	0.00153	0.00122	0.00183	0.00136
32.88	0.00118	0.00166	0.00112	0.0018	0.0017	0.00133	0.00171	0.00107	0.0017	0.00137	0.00204	0.00148
33.12	0.00122	0.00173	0.00141	0.00168	0.00187	0.00162	0.00165	0.00149	0.00194	0.00146	0.00191	0.00162
33.36	0.00143	0.00179	0.00144	0.00179	0.0019	0.00171	0.00174	0.0013	0.00186	0.00163	0.00203	0.00152
33.6	0.0016	0.00165	0.00151	0.00174	0.00205	0.00199	0.00182	0.00155	0.00198	0.00165	0.00232	0.0014
33.84	0.00137	0.00215	0.00185	0.00185	0.00211	0.00189	0.00193	0.00158	0.00199	0.00164	0.00244	0.00168
34.08	0.00139	0.00198	0.00176	0.00207	0.00228	0.00174	0.00206	0.00163	0.002	0.00197	0.00239	0.00196
34.32	0.00172	0.00209	0.00183	0.00191	0.00222	0.00197	0.00195	0.00182	0.00222	0.0019	0.00233	0.00211
34.56	0.00164	0.00219	0.00174	0.00217	0.0022	0.00211	0.00238	0.00177	0.00233	0.002	0.00271	0.00198
34.8	0.00181	0.00222	0.00198	0.00203	0.0023	0.00217	0.00236	0.00189	0.00235	0.00223	0.00287	0.00164
35.04	0.00196	0.00234	0.00197	0.00204	0.00242	0.00219	0.00258	0.00194	0.0025	0.00192	0.00284	0.0021
35.28	0.0018	0.00223	0.00235	0.00231	0.00246	0.00222	0.00259	0.00188	0.00261	0.00243	0.00318	0.00213
35.52	0.00185	0.00261	0.00222	0.00242	0.00263	0.00235	0.0025	0.00198	0.00264	0.0023	0.00318	0.00222
35.76	0.00194	0.0024	0.00214	0.00263	0.00237	0.00252	0.00257	0.00202	0.00283	0.00231	0.00344	0.00251
36	0.00194	0.00282	0.0022	0.00258	0.0025	0.00258	0.00248	0.00194	0.00283	0.00237	0.00326	0.00251
36.24	0.00203	0.00261	0.00243	0.00225	0.00258	0.00243	0.00274	0.00213	0.00261	0.0023	0.00323	0.00241
36.48	0.00212	0.00283	0.00251	0.00251	0.00255	0.00259	0.00282	0.0022	0.00275	0.00267	0.00338	0.00277
36.72	0.0021	0.00288	0.00236	0.00269	0.00283	0.00268	0.0029	0.00227	0.00287	0.00283	0.00371	0.00238
36.96	0.00201	0.00287	0.0024	0.00245	0.00255	0.00261	0.0028	0.00239	0.00297	0.00283	0.00379	0.00268
37.2	0.0023	0.00298	0.00252	0.00269	0.00265	0.00262	0.00296	0.0024	0.00313	0.00257	0.00374	0.00248
37.44	0.00219	0.00317	0.00229	0.00265	0.0026	0.00246	0.00271	0.00212	0.00294	0.00278	0.00345	0.0027
37.68	0.0024	0.00305	0.0025	0.0027	0.00253	0.00244	0.00332	0.00239	0.00317	0.00308	0.00398	0.00252
37.92	0.00253	0.00317	0.00284	0.00304	0.00285	0.00298	0.00315	0.00251	0.00287	0.00288	0.00404	0.00278
38.16	0.00261	0.00285	0.00287	0.00289	0.00287	0.00289	0.0032	0.00241	0.00325	0.00293	0.00383	0.00288
38.4	0.00235	0.00309	0.00258	0.00272	0.00289	0.00273	0.00299	0.00262	0.00329	0.00287	0.00388	0.00324
38.64	0.0024	0.00285	0.00275	0.0029	0.00294	0.00269	0.00343	0.00267	0.00335	0.00308	0.00413	0.003
38.88	0.00248	0.00298	0.003	0.00326	0.00311	0.00309	0.00345	0.00251	0.00358	0.00308	0.00403	0.00325
39.12	0.00231	0.00309	0.00296	0.00283	0.003	0.00296	0.00348	0.00247	0.00337	0.00309	0.00393	0.00304
39.36	0.00256	0.0031	0.00325	0.00289	0.00279	0.00295	0.00344	0.00261	0.00357	0.00317	0.0042	0.00315
39.6	0.00242	0.00334	0.00278	0.00284	0.00305	0.00293	0.00359	0.00286	0.00347	0.0031	0.00419	0.00319
39.84	0.00215	0.00329	0.00322	0.00324	0.00315	0.00309	0.00352	0.00295	0.00361	0.00335	0.00432	0.00337
40.08	0.00226	0.00342	0.00308	0.00318	0.0033	0.00313	0.00334	0.00279	0.00386	0.00334	0.00422	0.00325
40.32	0.00266	0.00352	0.00291	0.00294	0.00305	0.00307	0.00365	0.00259	0.0039	0.00352	0.00443	0.00328
40.56	0.00223	0.00322	0.00317	0.00324	0.00322	0.00322	0.00374	0.00281	0.00372	0.00324	0.00435	0.00349
40.8	0.00261	0.00353	0.00297	0.00323	0.0031	0.00304	0.00369	0.00266	0.0039	0.00335	0.00409	0.00318
41.04	0.00244	0.00344	0.00307	0.00325	0.00335	0.00336	0.00376	0.00299	0.00361	0.00319	0.00442	0.00341
41.28	0.00242	0.00337	0.00326	0.00342	0.00314	0.00319	0.00378	0.00296	0.00376	0.00336	0.00455	0.00342
41.52	0.00248	0.00321	0.0032	0.00348	0.00297	0.00315	0.00355	0.00266	0.0039	0.00339	0.00448	0.00346
41.76	0.00249	0.00361	0.0032	0.00324	0.00331	0.0032	0.00369	0.00278	0.00376	0.00311	0.00471	0.00346
42	0.00245	0.00356	0.00322	0.00356	0.00312	0.00324	0.00386	0.00292	0.00387	0.00343	0.00459	0.00366
42.24	0.0024	0.00351	0.00318	0.00319	0.00316	0.00314	0.00371	0.00289	0.00387	0.00347	0.00448	0.0036
42.48	0.00243	0.00365	0.00331	0.0034	0.00322	0.00326	0.00392	0.00278	0.00403	0.00379	0.00485	0.00376
42.72	0.0027	0.00374	0.00326	0.00349	0.00343	0.0034	0.00375	0.00304	0.00402	0.00357	0.00502	0.0037
42.96	0.0026	0.00337	0.00338	0.00349	0.0033	0.00358	0.00405	0.003	0.00378	0.0039	0.00478	0.00391
43.2	0.00233	0.00366	0.00327	0.00346	0.00333	0.00313	0.00366	0.00343	0.00403	0.00364	0.00488	0.00381
43.44	0.00229	0.00378	0.00351	0.00367	0.00309	0.00326	0.0039	0.00303	0.00399	0.00374	0.00492	0.00388
43.68	0.00258	0.00356	0.00319	0.00334	0.00345	0.00339	0.00393	0.00316	0.00402	0.00377	0.00494	0.00372
43.92	0.00281	0.00366	0.00327	0.00352	0.00347	0.00312	0.00398	0.00316	0.0042	0.00366	0.00503	0.00378
44.16	0.0025	0.00393	0.00348	0.00341	0.00352	0.00339	0.004	0.00325	0.00399	0.00366	0.00493	0.0042
44.4	0.00275	0.00376	0.00344	0.0032	0.00358	0.00342	0.00415	0.00286	0.00408	0.00375	0.00482	0.00378
44.64	0.00281	0.00362	0.0036	0.00357	0.00344	0.00329	0.00387	0.00315	0.00416	0.00368	0.00464	0.00377
44.88	0.00263	0.00379	0.00346	0.00371	0.00345	0.00353	0.00408	0.00301	0.00423	0.00395	0.00516	0.00385
45.12	0.00269	0.00369	0.00362	0.00375	0.00367	0.00356	0.00436	0.00308	0.00446	0.00405	0.00495	0.00388
45.36	0.00295	0.00373	0.00361	0.00344	0.00346	0.00347	0.00415	0.00344	0.00418	0.00409	0.00483	0.00378
45.6	0.00274	0.00381	0.00365	0.00365	0.00344	0.00365	0.00405	0.00326	0.00435	0.0036	0.00512	0.00387
45.84	0.00309	0.00393	0.00364	0.0037	0.00333	0.00349	0.00414	0.00327	0.00382	0.00399	0.00529	0.00415
46.08	0.00287	0.00384	0.00395	0.0036	0.00346	0.00367	0.00407	0.00351	0.00414	0.0039	0.00483	0.00397
46.32	0.00285	0.00389	0.00367	0.00393	0.00333	0.00361	0.00432	0.00305	0.00445	0.00401	0.00519	0.00415
46.56	0.00276	0.00395	0.0038	0.00365	0.00351	0.00359	0.00417	0.00364	0.00423	0.00397	0.0051	0.0041
46.8	0.00276	0.00395	0.00346	0.00365	0.00346	0.00344	0.00407	0.0035	0.00438	0.00423	0.00546	0.0041
47.04	0.00269	0.00401	0.00381	0.00375	0.00388	0.00362	0.00438	0.00341	0.00424	0.00422	0.00493	0.00395
47.28	0.00305	0.00396	0.00365	0.00368	0.00365	0.00376	0.0041	0.00352	0.00425	0.004	0.00548	0.00429
47.52	0.00303	0.00376	0.00377	0.00376	0.0037	0.00349	0.00447	0.00345	0.00468	0.00406	0.0054	0.00412
47.76	0.00288	0.00395	0.00383	0.00376	0.00351	0.00367	0.0042	0.0035	0.00424	0.00408	0.00537	0.00434
48	0.00291	0.00392	0.0039	0.00373	0.00364	0.0036	0.00445	0.0034	0.0045	0.00407	0.00549	0.00401
48.24	0.0031	0.0042	0.00372	0.00392	0.00366	0.00367	0.00432	0.00367	0.00449	0.00431	0.00542	0.00389
48.48	0.00309	0.00417	0.00404	0.00412	0.00385	0.0038	0.00448	0.00334	0.0044	0.00401	0.00543	0.00419
48.72	0.00284	0.00409	0.0038	0.00377	0.00369	0.00378	0.0044	0.00325	0.00441	0.00428	0.00547	0.00409
48.96	0.00319	0.00424	0.00396	0.00378	0.00361	0.00357	0.00444	0.00364	0.00441	0.00397	0.00542	0.00453
49.2	0.00304	0.00396	0.00365	0.004	0.00372	0.00378	0.00432	0.00343	0.00441	0.00435	0.00551	0.00424
49.44	0.00302	0.00399	0.00379	0.00416	0.00381	0.00368	0.00445	0.00352	0.00478	0.00402	0.00539	0.00422
49.68	0.00303	0.00421	0.00384	0.00375	0.00366	0.00364	0.00449	0.00338	0.00464	0.0043	0.00527	0.00445
49.92	0.00308	0.00405	0.00397	0.00396	0.00363	0.00359	0.00462	0.00355	0.0045	0.00432	0.00523	0.00443
50.16	0.00309	0.00393	0.00388	0.00383	0.00377	0.00381	0.00459	0.00364	0.0048	0.00434	0.00542	0.00435
50.4	0.00294	0.00405	0.004	0.00392	0.00371	0.0037	0.00437	0.00336	0.00443	0.0042	0.00549	0.00436
50.64	0.00316	0.00452	0.00395	0.00405	0.00396	0.00368	0.00452	0.00356	0.00462	0.00453	0.00557	0.00426
50.88	0.00338	0.0041	0.00397	0.00411	0.00386	0.00397	0.00442	0.00361	0.00456	0.00438	0.00556	0.00449
51.12	0.00316	0.0042	0.00394	0.00404	0.00409	0.00366	0.00452	0.00357	0.00471	0.00438	0.00554	0.00452
51.36	0.00326	0.00405	0.00438	0.00403	0.00387	0.0036	0.00469	0.00363	0.00458	0.00439	0.00538	0.00407
51.6	0.00309	0.00412	0.00406	0.00436	0.00403	0.00359	0.00441	0.00358	0.00488	0.00428	0.00529	0.00444
51.84	0.00305	0.00444	0.00424	0.00402	0.00382	0.0039	0.00473	0.00348	0.00466	0.0043	0.00562	0.00454
52.08	0.00303	0.00413	0.00424	0.004	0.00411	0.00385	0.00455	0.00376	0.00453	0.00463	0.00582	0.00436
52.32	0.00304	0.00434	0.00412	0.00436	0.00391	0.00405	0.00477	0.00379	0.00473	0.00424	0.00566	0.0046
52.56	0.00309	0.00404	0.00405	0.00393	0.00381	0.00408	0.00467	0.00378	0.00478	0.00428	0.00575	0.00453
52.8	0.00305	0.00425	0.00429	0.00406	0.00392	0.004	0.00469	0.00389	0.00484	0.00455	0.00566	0.00451
53.04	0.00331	0.00404	0.00405	0.00391	0.00394	0.00435	0.00472	0.00382	0.00475	0.00448	0.00571	0.00481
53.28	0.00321	0.0046	0.00399	0.00416	0.00397	0.00416	0.00491	0.00361	0.00466	0.00442	0.00558	0.00474
53.52	0.00331	0.00451	0.00424	0.0044	0.00402	0.00377	0.00486	0.00376	0.00467	0.00435	0.00595	0.0043
53.76	0.0032	0.00432	0.00414	0.00404	0.00402	0.00392	0.00442	0.00376	0.00499	0.00448	0.00573	0.00474
54	0.00326	0.00453	0.00411	0.00395	0.00402	0.00374	0.00508	0.00382	0.00473	0.00467	0.00551	0.00467
54.24	0.00297	0.00414	0.00401	0.00438	0.0039	0.00401	0.00488	0.00369	0.00448	0.00456	0.00564	0.00455
54.48	0.00313	0.00433	0.00408	0.00401	0.00398	0.00416	0.0047	0.00359	0.00488	0.00445	0.00568	0.00454
54.72	0.00337	0.00421	0.00427	0.00397	0.00391	0.004	0.00477	0.0036	0.00485	0.0048	0.00576	0.00455
54.96	0.00339	0.00431	0.00435	0.00407	0.00387	0.00399	0.00472	0.00358	0.00468	0.00452	0.00596	0.00489
55.2	0.00347	0.00438	0.00438	0.00439	0.00417	0.00393	0.00488	0.00381	0.0049	0.0045	0.00601	0.00463
55.44	0.00336	0.00455	0.00452	0.00453	0.00426	0.00389	0.00509	0.00374	0.00477	0.00462	0.00583	0.00479
55.68	0.0032	0.00451	0.00441	0.00468	0.00402	0.00414	0.00496	0.00399	0.00478	0.00449	0.00597	0.00459
55.92	0.00335	0.0046	0.00454	0.00403	0.00362	0.00408	0.00498	0.00399	0.00484	0.00466	0.00594	0.00454
56.16	0.00329	0.00458	0.00438	0.00408	0.00416	0.00403	0.00488	0.00395	0.00498	0.00451	0.00609	0.00453
56.4	0.00324	0.0044	0.00417	0.00425	0.00398	0.0039	0.00507	0.00363	0.00502	0.00462	0.00583	0.0048
56.64	0.00358	0.00425	0.00416	0.00432	0.00419	0.00396	0.00501	0.00381	0.0047	0.00463	0.00616	0.00496
56.88	0.00334	0.00431	0.00424	0.00445	0.00377	0.00398	0.00515	0.00377	0.00489	0.00461	0.0057	0.00471
57.12	0.0034	0.00445	0.00427	0.0042	0.00429	0.00382	0.00514	0.00381	0.00476	0.00459	0.00593	0.00484
57.36	0.0034	0.00455	0.00449	0.00436	0.004	0.00428	0.00503	0.0041	0.00498	0.00477	0.00589	0.00466
57.6	0.00348	0.00454	0.00429	0.00455	0.00421	0.00433	0.00492	0.00398	0.00469	0.00489	0.00585	0.00483
57.84	0.00349	0.00445	0.00431	0.00447	0.00403	0.00405	0.0051	0.00386	0.00471	0.00464	0.00558	0.00484
58.08	0.00325	0.0046	0.00472	0.0044	0.00433	0.00383	0.00516	0.00375	0.00484	0.00467	0.00593	0.00501
58.32	0.00359	0.00447	0.00442	0.00394	0.00426	0.00401	0.00514	0.00399	0.00466	0.00479	0.00607	0.00479
58.56	0.00338	0.0047	0.00442	0.00421	0.00424	0.00424	0.00507	0.00377	0.00483	0.00484	0.00609	0.00465
58.8	0.0034	0.00434	0.00437	0.00409	0.00429	0.00413	0.00507	0.00394	0.00484	0.00471	0.00608	0.0046
59.04	0.00364	0.0044	0.00442	0.00432	0.00386	0.00445	0.00507	0.00402	0.00482	0.00473	0.00577	0.00478
59.28	0.00358	0.00443	0.00447	0.00459	0.00419	0.00396	0.00509	0.00377	0.00488	0.00437	0.00569	0.00474
59.52	0.00337	0.00466	0.00437	0.00433	0.00432	0.00412	0.00526	0.00375	0.00501	0.00479	0.00592	0.00488
59.76	0.00355	0.00451	0.00459	0.00452	0.00395	0.0043	0.00518	0.0039	0.00508	0.00471	0.00608	0.0047
60	0.00348	0.00424	0.00425	0.00423	0.00424	0.00426	0.00507	0.00421	0.00504	0.0046	0.00582	0.0047
60.24	0.00343	0.00455	0.00457	0.00437	0.00429	0.00426	0.00516	0.00378	0.00497	0.00487	0.00598	0.00485
60.48	0.00356	0.00467	0.0043	0.00415	0.00393	0.00422	0.00487	0.0036	0.00483	0.00472	0.00595	0.00476
60.72	0.00356	0.00457	0.0043	0.00423	0.00425	0.00408	0.00523	0.00385	0.00492	0.00489	0.00598	0.00485
60.96	0.00344	0.00439	0.00436	0.00434	0.00404	0.00425	0.00505	0.00399	0.00494	0.00502	0.006	0.00503
61.2	0.00349	0.00455	0.00434	0.00436	0.00412	0.00433	0.00508	0.00392	0.00506	0.00482	0.00579	0.00506
61.44	0.00355	0.00471	0.00469	0.00434	0.00441	0.00435	0.00519	0.00397	0.00512	0.00468	0.00577	0.00496
61.68	0.00371	0.00475	0.0045	0.00432	0.00429	0.0043	0.00512	0.00378	0.00491	0.00471	0.0058	0.00489
61.92	0.00356	0.00464	0.00439	0.00417	0.00401	0.00425	0.00509	0.00409	0.00496	0.00477	0.00616	0.00497
62.16	0.00352	0.00474	0.0044	0.00402	0.00417	0.00407	0.00506	0.00372	0.00486	0.0048	0.00614	0.0048
62.4	0.00368	0.00466	0.00446	0.00431	0.00425	0.00405	0.00525	0.00387	0.00485	0.00491	0.00609	0.00475
62.64	0.0036	0.00477	0.00454	0.00438	0.0041	0.00409	0.00497	0.00412	0.00511	0.00462	0.00599	0.00513
62.88	0.00353	0.00472	0.00437	0.00434	0.0043	0.00425	0.00533	0.00409	0.00498	0.00496	0.00612	0.00489
63.12	0.00349	0.00438	0.00461	0.0044	0.00435	0.00427	0.0054	0.00412	0.00507	0.00494	0.00617	0.00485
63.36	0.00359	0.0047	0.00474	0.00437	0.00435	0.00423	0.00529	0.00424	0.00497	0.00488	0.00611	0.00485
63.6	0.00345	0.00477	0.00442	0.00445	0.00415	0.00426	0.0052	0.00407	0.00495	0.00504	0.00642	0.00489
63.84	0.0037	0.00456	0.00467	0.00427	0.00396	0.00433	0.00493	0.00397	0.00514	0.00459	0.006	0.00483
64.08	0.00388	0.00456	0.00474	0.0046	0.0042	0.0043	0.0053	0.00422	0.00504	0.00504	0.00599	0.00504
64.32	0.00363	0.00475	0.00482	0.00447	0.00423	0.00425	0.00533	0.00402	0.00484	0.00466	0.00616	0.00489
64.56	0.00357	0.00463	0.00453	0.00423	0.00442	0.00418	0.00501	0.00413	0.00518	0.00467	0.00607	0.00495
64.8	0.00371	0.00446	0.00456	0.00428	0.00423	0.00425	0.00504	0.00405	0.005	0.00508	0.00615	0.00506
65.04	0.00355	0.00469	0.00477	0.00434	0.00433	0.00413	0.00541	0.00411	0.0049	0.00502	0.00631	0.0051
65.28	0.00364	0.00462	0.00453	0.00451	0.00445	0.00442	0.00546	0.00429	0.00529	0.0049	0.00593	0.00512
65.52	0.00367	0.0045	0.0047	0.00424	0.00424	0.00414	0.00514	0.00411	0.00513	0.0048	0.00612	0.00488
65.76	0.00345	0.00466	0.00468	0.00465	0.00428	0.00444	0.00522	0.00391	0.00503	0.00509	0.00588	0.00493
66	0.0036	0.00481	0.00468	0.00425	0.00416	0.00416	0.00518	0.00419	0.00497	0.0048	0.00618	0.00514
66.24	0.00382	0.00459	0.00454	0.00464	0.00456	0.00412	0.00558	0.00413	0.00486	0.00488	0.00606	0.00492
66.48	0.00373	0.00441	0.00482	0.0043	0.00462	0.00433	0.00531	0.00429	0.0051	0.00501	0.00611	0.00507
66.72	0.00366	0.00455	0.0044	0.00454	0.00418	0.00415	0.0051	0.00406	0.00522	0.00506	0.0062	0.00509
66.96	0.00363	0.00452	0.00489	0.00427	0.00431	0.004	0.0054	0.00437	0.00524	0.00492	0.00604	0.00514
67.2	0.00362	0.00471	0.00457	0.00431	0.00436	0.00424	0.00507	0.00404	0.00513	0.00503	0.00603	0.00482
67.44	0.00378	0.00465	0.00485	0.00434	0.00455	0.00411	0.00523	0.004	0.00502	0.00484	0.00638	0.005
67.68	0.0038	0.00472	0.00511	0.00449	0.00449	0.00403	0.00512	0.00421	0.00518	0.00512	0.00628	0.00511
67.92	0.00375	0.00462	0.00489	0.00449	0.00453	0.00453	0.0054	0.00405	0.00508	0.00493	0.00621	0.00506
68.16	0.00371	0.00462	0.00493	0.00441	0.00465	0.00423	0.00533	0.00409	0.00508	0.00487	0.0059	0.00513
68.4	0.00399	0.0049	0.00484	0.00442	0.00443	0.00432	0.00536	0.00425	0.00518	0.00498	0.00611	0.00476
68.64	0.00373	0.00474	0.00497	0.0044	0.0043	0.00436	0.00538	0.0042	0.00518	0.00507	0.00601	0.00523
68.88	0.00374	0.00466	0.00502	0.00459	0.00446	0.00434	0.00527	0.00403	0.00532	0.00461	0.00595	0.00503
69.12	0.0038	0.00492	0.00478	0.00438	0.00435	0.00449	0.00533	0.00384	0.00507	0.00513	0.00624	0.00494
69.36	0.00366	0.00504	0.00494	0.00477	0.00457	0.00423	0.0053	0.00428	0.00514	0.00496	0.00608	0.00506
69.6	0.0039	0.00489	0.00468	0.00446	0.00431	0.00416	0.00515	0.0042	0.00528	0.00481	0.00628	0.00521
69.84	0.00386	0.0046	0.00477	0.00445	0.00435	0.00437	0.0054	0.00402	0.00501	0.00498	0.00614	0.00508
70.08	0.00364	0.00502	0.00476	0.00462	0.00443	0.00436	0.00526	0.00425	0.00518	0.005	0.00607	0.00481
70.32	0.00352	0.00472	0.00471	0.00449	0.00431	0.00427	0.00537	0.00408	0.00515	0.00493	0.00617	0.00511
70.56	0.00377	0.00466	0.00486	0.00446	0.00445	0.00426	0.00529	0.00421	0.0052	0.00456	0.00618	0.00491
70.8	0.00379	0.00486	0.00474	0.00445	0.00448	0.00431	0.00532	0.00426	0.00517	0.00479	0.00601	0.00525
71.04	0.00388	0.00478	0.00477	0.00434	0.00434	0.00441	0.00545	0.00383	0.00515	0.00486	0.00617	0.00545
71.28	0.00385	0.0046	0.00506	0.00443	0.0043	0.0042	0.00547	0.00395	0.00517	0.00495	0.00617	0.0049
71.52	0.00403	0.00497	0.00449	0.00438	0.00433	0.00428	0.0052	0.00428	0.00531	0.00494	0.00631	0.00513
71.76	0.0035	0.00495	0.00469	0.00442	0.00449	0.0045	0.00536	0.0042	0.0055	0.00496	0.00613	0.00515
72	0.00402	0.00479	0.00494	0.00476	0.0045	0.00455	0.00528	0.00417	0.00515	0.00524	0.00615	0.00493
72.24	0.00366	0.00464	0.0047	0.00439	0.00452	0.00442	0.0053	0.00419	0.00511	0.00525	0.00622	0.00512
72.48	0.00388	0.00475	0.00496	0.00453	0.00437	0.00438	0.00551	0.00415	0.00519	0.00483	0.00613	0.00501
72.72	0.00381	0.00484	0.00501	0.00461	0.00439	0.00419	0.00525	0.00422	0.00514	0.00527	0.00627	0.00484
72.96	0.0037	0.00482	0.00472	0.00454	0.00427	0.00461	0.00544	0.00443	0.00498	0.00499	0.00595	0.00528
73.2	0.00372	0.00497	0.00468	0.00487	0.0043	0.00422	0.00531	0.00449	0.00545	0.00502	0.00636	0.00505
73.44	0.00378	0.00481	0.00476	0.0043	0.00458	0.00431	0.00537	0.00424	0.00511	0.00498	0.00624	0.00484
73.68	0.0039	0.00485	0.00476	0.00463	0.00434	0.00448	0.00554	0.00425	0.00514	0.00499	0.00605	0.00508
73.92	0.00378	0.00483	0.00491	0.00444	0.00464	0.00419	0.00542	0.00428	0.00507	0.005	0.00626	0.00478
74.16	0.00385	0.00518	0.0048	0.0044	0.00442	0.00437	0.00534	0.00418	0.00487	0.00476	0.00616	0.00508
74.4	0.00415	0.00485	0.00468	0.00421	0.00448	0.00426	0.00545	0.00413	0.00512	0.00495	0.0061	0.00493
74.64	0.00389	0.00471	0.0049	0.00433	0.00456	0.00449	0.00539	0.00426	0.00507	0.00538	0.00637	0.00471
74.88	0.00404	0.00492	0.00489	0.00463	0.00439	0.00438	0.00539	0.00431	0.00496	0.00501	0.00645	0.00507
75.12	0.00379	0.00474	0.00483	0.00449	0.00446	0.00455	0.00525	0.00414	0.005	0.00532	0.00641	0.005
75.36	0.00395	0.00522	0.00492	0.00467	0.00448	0.00438	0.00571	0.00431	0.00543	0.00511	0.00655	0.00516
75.6	0.00397	0.00491	0.0051	0.00449	0.00477	0.00432	0.00558	0.00437	0.00529	0.00511	0.00608	0.0052
75.84	0.00388	0.00503	0.00524	0.00442	0.00466	0.00426	0.00537	0.00418	0.00535	0.00514	0.00634	0.005
76.08	0.00397	0.00493	0.00497	0.0045	0.00457	0.00423	0.0055	0.00437	0.00517	0.00509	0.00619	0.00516
76.32	0.00424	0.00506	0.00478	0.00484	0.00446	0.00431	0.00541	0.00406	0.0052	0.00509	0.00615	0.00523
76.56	0.004	0.00449	0.00494	0.00469	0.00454	0.00447	0.00558	0.00423	0.00517	0.00494	0.00587	0.00539
76.8	0.0042	0.00464	0.00491	0.00474	0.00454	0.00466	0.0056	0.0043	0.00509	0.00536	0.00631	0.00556
77.04	0.0039	0.00487	0.00485	0.00419	0.00437	0.0044	0.00531	0.00425	0.0053	0.00502	0.00641	0.00523
77.28	0.00387	0.00491	0.00494	0.00468	0.00463	0.00432	0.00552	0.00415	0.00514	0.00509	0.0064	0.00509
77.52	0.00395	0.00502	0.00505	0.00476	0.00445	0.00424	0.00551	0.00444	0.00508	0.00508	0.00641	0.00502
77.76	0.00356	0.00469	0.00504	0.00464	0.00432	0.00442	0.00563	0.00433	0.00536	0.0053	0.00633	0.00516
78	0.0038	0.00491	0.00484	0.00464	0.0043	0.00452	0.00563	0.00415	0.00514	0.00499	0.00629	0.00513
78.24	0.00386	0.00468	0.00509	0.00448	0.0044	0.0043	0.00551	0.00444	0.00541	0.00508	0.00632	0.00514
78.48	0.00371	0.00483	0.00504	0.00446	0.00458	0.00416	0.00553	0.00417	0.00499	0.00523	0.00613	0.00513
78.72	0.00403	0.0049	0.00486	0.00449	0.0047	0.00431	0.00547	0.00408	0.00499	0.00532	0.00643	0.00502
78.96	0.0037	0.00513	0.00479	0.00422	0.00457	0.00449	0.00557	0.00423	0.00523	0.00509	0.00611	0.00494
79.2	0.00415	0.00465	0.00481	0.00466	0.00457	0.00453	0.00552	0.00449	0.00531	0.00488	0.00627	0.005
79.44	0.00384	0.00476	0.00503	0.00454	0.0044	0.00437	0.00547	0.00441	0.00492	0.00495	0.00619	0.0052
79.68	0.00419	0.00506	0.00493	0.00442	0.0047	0.00441	0.00543	0.00431	0.00529	0.00524	0.0064	0.00501
79.92	0.0037	0.00501	0.00514	0.00436	0.00441	0.00431	0.0055	0.00412	0.00522	0.00497	0.00631	0.0049
80.16	0.0039	0.00478	0.0048	0.00468	0.00458	0.00447	0.00533	0.00429	0.00517	0.00505	0.00628	0.00513
80.4	0.00397	0.00496	0.00488	0.00455	0.00464	0.00435	0.00554	0.00433	0.00538	0.00512	0.00617	0.00514
80.64	0.0036	0.00458	0.00509	0.00431	0.00453	0.00415	0.00553	0.0042	0.0052	0.0052	0.00593	0.005
80.88	0.0038	0.00499	0.00495	0.0047	0.00435	0.0042	0.00552	0.00435	0.00513	0.00486	0.00621	0.00513
81.12	0.00355	0.005	0.00513	0.00472	0.00463	0.00436	0.0056	0.00419	0.00513	0.00535	0.00604	0.00536
81.36	0.00392	0.00486	0.00505	0.00447	0.00439	0.00404	0.00528	0.00415	0.00534	0.00493	0.00625	0.00527
81.6	0.00385	0.00483	0.00483	0.00447	0.0043	0.00452	0.00564	0.00452	0.0052	0.0052	0.00633	0.00503
81.84	0.00406	0.00489	0.005	0.00463	0.00446	0.00441	0.00558	0.00415	0.00521	0.0052	0.00647	0.00528
82.08	0.00383	0.00481	0.00501	0.00464	0.00469	0.00428	0.0056	0.00435	0.00516	0.00483	0.00627	0.00505
82.32	0.00396	0.0047	0.00482	0.00478	0.00442	0.00462	0.00537	0.00429	0.00508	0.005	0.0061	0.00496
82.56	0.00411	0.00479	0.00504	0.00456	0.00459	0.00449	0.00576	0.00433	0.00541	0.00516	0.00626	0.00482
82.8	0.00439	0.00508	0.00514	0.00455	0.00474	0.00431	0.00547	0.00422	0.00511	0.00507	0.00624	0.00505
83.04	0.00386	0.00479	0.00469	0.00458	0.00465	0.00446	0.00553	0.00406	0.00515	0.00496	0.00616	0.00501
83.28	0.00399	0.00467	0.00532	0.00438	0.00449	0.00442	0.00565	0.00432	0.00503	0.00506	0.0062	0.00503
83.52	0.004	0.00513	0.00493	0.00486	0.00462	0.00439	0.00543	0.00422	0.0051	0.00511	0.00625	0.00505
83.76	0.00401	0.00498	0.00483	0.00446	0.00484	0.00457	0.00565	0.00454	0.00511	0.00494	0.00614	0.00499
84	0.00392	0.00491	0.00518	0.00473	0.00447	0.00429	0.00529	0.0045	0.00528	0.00515	0.00601	0.00499
84.24	0.0039	0.00504	0.00516	0.00463	0.0044	0.00439	0.00566	0.00424	0.00516	0.00528	0.00644	0.00506
84.48	0.00383	0.005	0.00494	0.00482	0.00467	0.0043	0.0054	0.00422	0.0052	0.00522	0.00628	0.00517
84.72	0.00408	0.00501	0.00495	0.0044	0.00453	0.00433	0.00543	0.00437	0.0049	0.00494	0.00628	0.00489
84.96	0.00413	0.00478	0.005	0.00484	0.0047	0.00436	0.00548	0.0043	0.00494	0.00517	0.00635	0.00519
85.2	0.00414	0.00489	0.00516	0.00471	0.00421	0.00444	0.00556	0.00449	0.00512	0.00522	0.00646	0.00524
85.44	0.00375	0.005	0.00483	0.00469	0.00445	0.00451	0.00538	0.00419	0.00528	0.00461	0.00612	0.00537
85.68	0.00414	0.00484	0.00507	0.00458	0.00463	0.00433	0.0058	0.00449	0.00544	0.00526	0.00622	0.00531
85.92	0.00397	0.00513	0.00497	0.00446	0.00463	0.00429	0.0054	0.00421	0.00519	0.00511	0.00631	0.00532
86.16	0.00413	0.00503	0.00516	0.00438	0.00443	0.00462	0.00568	0.00456	0.00521	0.00512	0.00607	0.00515
86.4	0.00384	0.00491	0.00513	0.00465	0.00465	0.00426	0.00572	0.00419	0.00511	0.00516	0.00647	0.00498
86.64	0.00387	0.0051	0.00508	0.00436	0.00459	0.00439	0.00578	0.00423	0.00533	0.00507	0.00603	0.00522
86.88	0.00407	0.00476	0.00514	0.00442	0.00429	0.00447	0.00562	0.00456	0.00515	0.00528	0.00623	0.00503
87.12	0.00384	0.00477	0.00529	0.00479	0.00442	0.00447	0.00554	0.00437	0.00555	0.00516	0.00621	0.00504
87.36	0.00415	0.00493	0.00504	0.0046	0.0045	0.00446	0.00561	0.00441	0.00502	0.005	0.00606	0.00505
87.6	0.00411	0.00486	0.00519	0.00502	0.0046	0.00411	0.00565	0.00432	0.00513	0.00512	0.00628	0.00492
87.84	0.00399	0.00519	0.00492	0.00457	0.00458	0.0044	0.00574	0.00434	0.00515	0.00532	0.0063	0.00521
88.08	0.00398	0.00488	0.00531	0.00497	0.00459	0.00446	0.00552	0.00452	0.00536	0.00512	0.00601	0.00483
88.32	0.004	0.0048	0.00487	0.00461	0.00444	0.0046	0.00553	0.00429	0.00517	0.005	0.00613	0.00499
88.56	0.00406	0.00499	0.00516	0.00465	0.00464	0.00429	0.0056	0.00444	0.00519	0.00515	0.00619	0.00516
88.8	0.00416	0.00496	0.00479	0.00482	0.00476	0.00445	0.00579	0.00433	0.00496	0.00509	0.0064	0.00517
89.04	0.00388	0.00506	0.0052	0.00436	0.00473	0.00426	0.0054	0.00407	0.00509	0.00529	0.00627	0.00515
89.28	0.00395	0.00488	0.00504	0.00466	0.00458	0.00443	0.00544	0.00442	0.0052	0.00537	0.00645	0.0051
89.52	0.00404	0.00499	0.00524	0.00482	0.00442	0.0043	0.00544	0.00441	0.00502	0.00517	0.00576	0.00499
89.76	0.00374	0.00475	0.00511	0.00433	0.00442	0.00413	0.00568	0.00436	0.00472	0.00486	0.00623	0.00512
90	0.00392	0.00469	0.00531	0.00472	0.0047	0.00425	0.00557	0.00452	0.00503	0.00501	0.00591	0.00503
90.24	0.00396	0.00498	0.00492	0.00486	0.00447	0.00435	0.00534	0.00406	0.00499	0.00516	0.00636	0.00533
90.48	0.0041	0.00487	0.00522	0.00457	0.00475	0.0043	0.00554	0.00421	0.00517	0.00509	0.00596	0.00525
90.72	0.00413	0.00501	0.00496	0.00463	0.00472	0.00426	0.00532	0.00425	0.00483	0.00492	0.00626	0.00525
90.96	0.00401	0.00491	0.00544	0.00462	0.00446	0.00426	0.00567	0.00424	0.00489	0.00525	0.00574	0.00504
91.2	0.00426	0.00498	0.00525	0.00462	0.00434	0.00422	0.00531	0.00468	0.00519	0.00525	0.00621	0.00508
91.44	0.00389	0.00497	0.00487	0.0051	0.00439	0.0046	0.0058	0.00454	0.00529	0.00496	0.00617	0.00486
91.68	0.00406	0.00503	0.0052	0.00451	0.00439	0.00456	0.00551	0.00416	0.00494	0.00479	0.0062	0.00525
91.92	0.00408	0.00479	0.0049	0.00453	0.00484	0.00445	0.00565	0.00425	0.00523	0.005	0.0064	0.00524
92.16	0.00414	0.00487	0.00493	0.00472	0.00486	0.00446	0.00539	0.00429	0.00514	0.00519	0.00606	0.00515
92.4	0.00395	0.00506	0.00534	0.00464	0.00468	0.00418	0.00558	0.00447	0.00536	0.00507	0.00608	0.00487
92.64	0.00396	0.00471	0.0052	0.00458	0.00428	0.00446	0.00525	0.00421	0.00526	0.00528	0.00592	0.00507
92.88	0.00423	0.00532	0.0052	0.00479	0.00461	0.00403	0.00538	0.00458	0.00523	0.00499	0.00582	0.00535
93.12	0.00417	0.00531	0.00501	0.00462	0.00449	0.00443	0.00525	0.00433	0.00505	0.00496	0.00628	0.00536
93.36	0.00408	0.00475	0.0051	0.00474	0.00479	0.00443	0.00563	0.00412	0.00542	0.00487	0.00626	0.00519
93.6	0.00417	0.005	0.00499	0.00458	0.0046	0.00439	0.00553	0.00416	0.00514	0.00508	0.00635	0.00509
93.84	0.00387	0.00516	0.00508	0.00457	0.00469	0.00433	0.00558	0.00428	0.00508	0.00538	0.00604	0.00506
94.08	0.00402	0.00469	0.00507	0.00479	0.00454	0.00432	0.00556	0.00437	0.00489	0.005	0.00583	0.00538
94.32	0.00398	0.00511	0.0051	0.00448	0.00443	0.00434	0.00538	0.00416	0.00501	0.00508	0.00614	0.00497
94.56	0.00409	0.00486	0.00498	0.00483	0.00456	0.00428	0.00546	0.0045	0.00502	0.00468	0.00623	0.00505
94.8	0.00407	0.00491	0.00518	0.0047	0.00473	0.00424	0.00527	0.00413	0.00507	0.00505	0.00613	0.00515
95.04	0.00399	0.00491	0.00527	0.00475	0.00473	0.00457	0.00559	0.00437	0.00517	0.00497	0.00606	0.00493
95.28	0.00403	0.00474	0.0053	0.00474	0.00469	0.00409	0.00552	0.00438	0.00513	0.00537	0.0061	0.00511
95.52	0.00418	0.00496	0.00508	0.00428	0.00466	0.00416	0.00574	0.00439	0.00495	0.00526	0.00635	0.00514
95.76	0.00392	0.00474	0.0053	0.00466	0.00465	0.00433	0.00567	0.00432	0.00528	0.00487	0.00629	0.00522
96	0.00419	0.0046	0.00489	0.00474	0.00465	0.00426	0.00574	0.00439	0.00549	0.00516	0.00618	0.00498
96.24	0.00417	0.00531	0.00515	0.00443	0.00434	0.00429	0.0056	0.00438	0.00509	0.00498	0.00608	0.00524
96.48	0.00403	0.00475	0.00488	0.00488	0.00458	0.00457	0.00573	0.00438	0.0052	0.00522	0.00593	0.00505
96.72	0.00408	0.00485	0.00493	0.00474	0.00463	0.00467	0.00552	0.00425	0.00517	0.00522	0.00632	0.00504
96.96	0.00429	0.00499	0.00505	0.00463	0.00458	0.00444	0.00522	0.00463	0.00515	0.00523	0.00649	0.00514
97.2	0.00422	0.00513	0.00522	0.00465	0.00453	0.00422	0.00581	0.00464	0.00487	0.00511	0.00615	0.00511
97.44	0.00423	0.00519	0.0052	0.00478	0.00448	0.00447	0.00551	0.00439	0.00513	0.00518	0.00621	0.00552
97.68	0.00392	0.00457	0.00515	0.00476	0.00439	0.00426	0.00556	0.00447	0.00509	0.00493	0.00599	0.005
97.92	0.00413	0.0051	0.00536	0.00471	0.0049	0.00463	0.00512	0.00422	0.00519	0.00515	0.00589	0.00517
98.16	0.0039	0.00485	0.00511	0.00467	0.00452	0.00428	0.00536	0.00445	0.00509	0.00492	0.00629	0.00514
98.4	0.00406	0.00516	0.0053	0.00476	0.00416	0.00441	0.0054	0.00443	0.00506	0.00496	0.00628	0.00525
98.64	0.00402	0.00478	0.00515	0.00465	0.00454	0.00432	0.00562	0.00455	0.00508	0.00506	0.00619	0.00476
98.88	0.00411	0.00507	0.00506	0.00469	0.00446	0.00439	0.00553	0.00436	0.00518	0.00514	0.00648	0.00546
99.12	0.00422	0.00491	0.00515	0.00474	0.00457	0.00422	0.00538	0.0043	0.00527	0.00516	0.00582	0.0051
99.36	0.00409	0.00465	0.005	0.00464	0.00462	0.004	0.00551	0.00449	0.00493	0.0054	0.00623	0.00538
99.6	0.00385	0.00507	0.00523	0.00459	0.00471	0.00455	0.00539	0.00437	0.00518	0.00512	0.00611	0.00527
99.84	0.00392	0.00484	0.0052	0.00481	0.00456	0.00437	0.00543	0.00431	0.00503	0.00524	0.00599	0.00507
100.08	0.00407	0.00491	0.00498	0.00484	0.00436	0.00437	0.00525	0.00424	0.00499	0.00524	0.00627	0.00485
100.32	0.00417	0.00491	0.00518	0.00472	0.00442	0.00391	0.00552	0.00416	0.00506	0.00494	0.00625	0.00511
100.56	0.00407	0.00518	0.005	0.00486	0.0046	0.00415	0.00548	0.0043	0.00491	0.00535	0.0062	0.00523
100.8	0.00412	0.00491	0.005	0.00488	0.00486	0.00395	0.00526	0.00416	0.00523	0.00506	0.00614	0.00534
101.04	0.00385	0.00462	0.00512	0.00465	0.00436	0.00419	0.00567	0.00425	0.00492	0.00495	0.00602	0.00518
101.28	0.00403	0.00488	0.00496	0.00483	0.00463	0.00438	0.00538	0.00434	0.00521	0.00543	0.00611	0.00532
101.52	0.00411	0.00507	0.0048	0.00464	0.00471	0.00408	0.00542	0.00433	0.00529	0.00508	0.00603	0.00481
101.76	0.00411	0.00488	0.00506	0.00474	0.0047	0.00443	0.00537	0.00447	0.00502	0.00493	0.00574	0.00509
102	0.00418	0.00486	0.00499	0.00427	0.00459	0.00444	0.00549	0.00468	0.00534	0.00505	0.00626	0.00493
102.24	0.00424	0.00494	0.00499	0.00491	0.00448	0.00443	0.00551	0.00448	0.00488	0.00518	0.00618	0.00507
102.48	0.00418	0.00495	0.00491	0.00472	0.00455	0.00431	0.0056	0.0042	0.00496	0.00506	0.00614	0.00512
102.72	0.00389	0.00495	0.00514	0.00462	0.00468	0.00409	0.00529	0.00429	0.00492	0.00514	0.00626	0.00493
102.96	0.004	0.00487	0.00499	0.00473	0.00477	0.00432	0.00549	0.00423	0.00489	0.00506	0.00631	0.0053
103.2	0.0041	0.00491	0.00524	0.0046	0.00467	0.00388	0.00516	0.00425	0.00509	0.00538	0.00623	0.00519
103.44	0.00409	0.00491	0.00492	0.00444	0.00461	0.00436	0.00539	0.00449	0.00507	0.00498	0.0059	0.00524
103.68	0.00432	0.00479	0.00506	0.00446	0.00452	0.00433	0.00572	0.00444	0.00511	0.00556	0.00619	0.00505
103.92	0.00414	0.00507	0.00505	0.00452	0.00437	0.00431	0.00566	0.00437	0.00493	0.00525	0.00636	0.00501
104.16	0.00384	0.00505	0.00506	0.0047	0.00433	0.0042	0.00547	0.00417	0.00502	0.00534	0.00575	0.00557
104.4	0.00418	0.00516	0.00485	0.00502	0.00457	0.00403	0.00559	0.00423	0.00499	0.00506	0.00604	0.0047
104.64	0.00387	0.00494	0.00498	0.00479	0.00471	0.00437	0.00515	0.00444	0.00509	0.00503	0.006	0.00496
104.88	0.00428	0.00469	0.0052	0.00478	0.00466	0.00402	0.0057	0.00421	0.0049	0.00499	0.00605	0.00517
105.12	0.00405	0.00492	0.00543	0.00468	0.00456	0.00433	0.00544	0.00438	0.00516	0.00507	0.00603	0.005
105.36	0.00409	0.00489	0.00511	0.00472	0.00464	0.00415	0.00561	0.00453	0.00508	0.00526	0.00604	0.0048
105.6	0.00404	0.00512	0.00509	0.00463	0.00458	0.00433	0.0053	0.00439	0.0049	0.00489	0.00624	0.00489
105.84	0.00416	0.00514	0.0049	0.00472	0.00468	0.0042	0.00553	0.00444	0.0051	0.00506	0.00601	0.00516
106.08	0.00405	0.00471	0.00495	0.00447	0.00467	0.00454	0.00562	0.00451	0.005	0.00489	0.0061	0.00529
106.32	0.00401	0.00475	0.00504	0.00471	0.00451	0.00443	0.00573	0.00407	0.00525	0.00498	0.00573	0.00527
106.56	0.0041	0.00482	0.00518	0.00467	0.0047	0.00433	0.0054	0.00428	0.00516	0.00495	0.00617	0.00526
106.8	0.0038	0.00523	0.00513	0.00473	0.0044	0.00432	0.00557	0.00455	0.00508	0.00492	0.00596	0.00477
107.04	0.00392	0.00473	0.0052	0.00465	0.00444	0.0045	0.00534	0.00449	0.00497	0.00526	0.00601	0.00506
107.28	0.00419	0.00504	0.00505	0.00483	0.00453	0.00449	0.00546	0.00428	0.00511	0.00528	0.00608	0.00525
107.52	0.00408	0.00454	0.00507	0.00501	0.00453	0.00454	0.00563	0.00431	0.005	0.00489	0.0061	0.0051
107.76	0.00404	0.00487	0.00517	0.0052	0.00442	0.00441	0.00557	0.00435	0.00504	0.00512	0.0059	0.00515
108	0.00424	0.00493	0.00521	0.00473	0.00465	0.00427	0.00562	0.00448	0.00519	0.00509	0.00605	0.00517
108.24	0.00403	0.00494	0.00511	0.00474	0.00471	0.00439	0.00534	0.00453	0.00523	0.0054	0.00602	0.00504
108.48	0.004	0.00474	0.00521	0.00455	0.00445	0.00441	0.00583	0.00431	0.00532	0.00504	0.00598	0.00483
108.72	0.004	0.00473	0.00515	0.00463	0.00429	0.00424	0.00542	0.00425	0.00505	0.00488	0.00589	0.00537
108.96	0.00403	0.00473	0.00505	0.00485	0.00428	0.00433	0.00541	0.00443	0.0049	0.00528	0.00603	0.00515
109.2	0.00401	0.0048	0.00502	0.00474	0.00452	0.00411	0.00558	0.00412	0.00488	0.0053	0.00607	0.0053
109.44	0.00397	0.00473	0.00533	0.00456	0.00427	0.00407	0.00551	0.00456	0.00499	0.00522	0.00601	0.00507
109.68	0.00416	0.00494	0.00531	0.00489	0.0046	0.00422	0.0055	0.00453	0.00483	0.00517	0.00596	0.00495
109.92	0.0038	0.00482	0.00494	0.00494	0.0046	0.00434	0.00556	0.00431	0.00522	0.00515	0.00586	0.00489
110.16	0.00384	0.00474	0.00488	0.00462	0.00435	0.00451	0.00537	0.00432	0.00499	0.00536	0.00595	0.00501
110.4	0.0041	0.00512	0.00502	0.00464	0.00445	0.0041	0.00535	0.00445	0.00484	0.00533	0.00616	0.00503
110.64	0.00412	0.00507	0.00491	0.00458	0.00454	0.00436	0.00555	0.00454	0.00508	0.0054	0.00593	0.00524
110.88	0.00414	0.00489	0.00508	0.00495	0.0045	0.00438	0.00584	0.00407	0.00509	0.00519	0.00606	0.00517
111.12	0.00411	0.00497	0.00522	0.00479	0.0048	0.00442	0.0054	0.00428	0.00514	0.00516	0.00602	0.00511
111.36	0.00417	0.00504	0.00506	0.0047	0.00452	0.0041	0.00529	0.00444	0.00486	0.00481	0.00608	0.00493
111.6	0.00414	0.00481	0.00501	0.00449	0.00459	0.00421	0.00537	0.00439	0.00494	0.00535	0.00582	0.00503
111.84	0.00437	0.00509	0.00521	0.00468	0.00454	0.00418	0.00539	0.00434	0.00506	0.00497	0.00595	0.00494
112.08	0.00402	0.005	0.00507	0.00462	0.00447	0.00444	0.00543	0.00432	0.00509	0.00527	0.00594	0.00499
112.32	0.0041	0.00481	0.005	0.00474	0.00459	0.00408	0.00512	0.00435	0.00495	0.00481	0.00594	0.00488
112.56	0.00394	0.00509	0.00529	0.00494	0.00464	0.00423	0.00531	0.00435	0.0052	0.00502	0.0061	0.00489
112.8	0.0039	0.005	0.00496	0.00486	0.00456	0.00476	0.00536	0.00444	0.00508	0.00496	0.0056	0.00515
113.04	0.00408	0.00461	0.00489	0.00444	0.00479	0.00418	0.00518	0.00427	0.00514	0.00502	0.00634	0.00511
113.28	0.00383	0.00494	0.00506	0.00461	0.00456	0.00443	0.00538	0.00446	0.00501	0.00528	0.00598	0.00529
113.52	0.00398	0.00488	0.00506	0.00483	0.00449	0.00417	0.00542	0.00429	0.00476	0.00523	0.00603	0.00526
113.76	0.0041	0.00514	0.00519	0.00478	0.00463	0.00416	0.00554	0.00426	0.00489	0.00506	0.0061	0.00519
114	0.00401	0.0046	0.00507	0.00459	0.00468	0.00418	0.00542	0.00429	0.00513	0.00505	0.00609	0.00492
114.24	0.00402	0.00469	0.00509	0.0047	0.00479	0.00428	0.00552	0.00476	0.00506	0.00518	0.00581	0.00499
114.48	0.00381	0.00504	0.00507	0.00473	0.00449	0.00463	0.00539	0.00426	0.00512	0.00511	0.00582	0.0053
114.72	0.00418	0.0049	0.00499	0.00479	0.00475	0.00432	0.00577	0.00451	0.00496	0.00515	0.00621	0.00474
114.96	0.00389	0.00478	0.00521	0.00467	0.00427	0.00421	0.0054	0.00447	0.00487	0.00497	0.00602	0.00526
115.2	0.00383	0.00482	0.00518	0.00435	0.0044	0.00431	0.00543	0.00434	0.0048	0.0052	0.00594	0.00524
115.44	0.00402	0.00476	0.00498	0.00507	0.00431	0.00435	0.00565	0.00426	0.00485	0.0049	0.00585	0.00513
115.68	0.00413	0.00499	0.00523	0.00434	0.00456	0.00419	0.00564	0.00429	0.00479	0.00492	0.00606	0.00515
115.92	0.00396	0.00498	0.00496	0.005	0.00443	0.00447	0.00552	0.00432	0.00522	0.00516	0.00589	0.00517
116.16	0.00408	0.00504	0.00496	0.00477	0.00461	0.00433	0.00561	0.00433	0.00489	0.00532	0.00573	0.00516
116.4	0.00393	0.00476	0.0053	0.00462	0.00439	0.00435	0.00554	0.00452	0.00493	0.00499	0.00575	0.00482
116.64	0.00422	0.00492	0.00527	0.00455	0.00438	0.00416	0.00539	0.00459	0.0052	0.00523	0.00572	0.00511
116.88	0.00395	0.00501	0.005	0.00468	0.00452	0.0042	0.00541	0.00426	0.00492	0.00523	0.00585	0.0049
117.12	0.00386	0.00484	0.00523	0.00433	0.00458	0.00404	0.00565	0.00441	0.00473	0.00502	0.00598	0.00521
117.36	0.00403	0.005	0.00509	0.00472	0.00446	0.00427	0.00565	0.00437	0.00508	0.00504	0.00597	0.00487
117.6	0.00408	0.00478	0.00518	0.00501	0.00423	0.00409	0.00576	0.00435	0.00489	0.00506	0.00597	0.00498
117.84	0.00393	0.00496	0.00512	0.00473	0.00461	0.00409	0.00533	0.00439	0.00491	0.00497	0.006	0.00499
118.08	0.00373	0.0048	0.0049	0.00469	0.00465	0.00416	0.00541	0.00436	0.00476	0.005	0.00595	0.0052
118.32	0.00423	0.00477	0.00484	0.00489	0.00428	0.00414	0.00523	0.00444	0.00497	0.00521	0.00571	0.00508
118.56	0.0043	0.00481	0.00479	0.00492	0.00449	0.00435	0.00553	0.00448	0.00503	0.00493	0.0058	0.00518
118.8	0.00415	0.00465	0.00503	0.0045	0.00462	0.00438	0.00542	0.00456	0.0051	0.00493	0.00609	0.00501
119.04	0.00424	0.00483	0.00554	0.00487	0.00463	0.00426	0.00566	0.00434	0.00523	0.00485	0.00593	0.00512
119.28	0.00396	0.00483	0.00499	0.00456	0.00474	0.00407	0.0053	0.0043	0.00522	0.00506	0.00597	0.00455
119.52	0.00411	0.00483	0.00519	0.0044	0.0046	0.00426	0.00544	0.0046	0.00484	0.00492	0.00605	0.0051
119.76	0.00396	0.00532	0.00515	0.00477	0.00474	0.00415	0.00522	0.00433	0.00512	0.00502	0.00586	0.00507
120	0.00386	0.00498	0.00522	0.00491	0.00459	0.00427	0.00537	0.00424	0.00486	0.00514	0.0058	0.00495
120.24	0.00402	0.00521	0.00515	0.0047	0.00468	0.00426	0.00558	0.00473	0.00522	0.00496	0.00573	0.00528
120.48	0.00369	0.00509	0.00532	0.00469	0.00475	0.00457	0.00568	0.00446	0.00487	0.00506	0.00577	0.00531
120.72	0.0039	0.00498	0.00497	0.00476	0.00459	0.00415	0.00547	0.00448	0.00474	0.00508	0.0061	0.0051
120.96	0.00387	0.00449	0.0051	0.00461	0.00457	0.00434	0.0053	0.00454	0.00491	0.00512	0.00593	0.00526
121.2	0.004	0.00503	0.005	0.00478	0.00426	0.00427	0.00524	0.00445	0.00496	0.00539	0.00596	0.00504
121.44	0.00389	0.00465	0.00499	0.00499	0.00452	0.0043	0.00559	0.00449	0.00495	0.00499	0.00598	0.00479
121.68	0.00402	0.00497	0.00486	0.00459	0.00436	0.0044	0.00528	0.00464	0.00498	0.00505	0.00583	0.00516
121.92	0.00401	0.00498	0.0054	0.0047	0.00442	0.00392	0.00533	0.00455	0.00481	0.00493	0.00581	0.00517
122.16	0.00393	0.00482	0.00501	0.00503	0.00467	0.00406	0.00531	0.00431	0.00472	0.00473	0.00563	0.00472
122.4	0.00387	0.00496	0.00532	0.00475	0.00421	0.00408	0.00548	0.00415	0.00479	0.00489	0.00584	0.00501
122.64	0.00387	0.00467	0.00489	0.00441	0.00433	0.00429	0.00577	0.00453	0.0051	0.00499	0.00576	0.00501
122.88	0.00396	0.00491	0.00493	0.00495	0.00427	0.00396	0.00554	0.00422	0.00483	0.00473	0.00582	0.00494
123.12	0.00403	0.00482	0.00505	0.00479	0.00447	0.00424	0.00519	0.00441	0.00497	0.00514	0.00574	0.00523
123.36	0.00405	0.00476	0.0051	0.00468	0.00458	0.0041	0.00528	0.00434	0.00475	0.00521	0.00583	0.00504
123.6	0.00411	0.00489	0.00503	0.00493	0.00462	0.00429	0.00545	0.00473	0.00497	0.00493	0.00615	0.00513
123.84	0.00404	0.00477	0.00529	0.00464	0.00451	0.00432	0.00528	0.00459	0.00486	0.00511	0.00596	0.00496
124.08	0.00409	0.00459	0.00522	0.0048	0.0044	0.00413	0.00527	0.00431	0.00491	0.00526	0.00571	0.00519
124.32	0.00376	0.00463	0.00521	0.00456	0.00454	0.00453	0.00553	0.00441	0.00471	0.00512	0.00557	0.00511
124.56	0.00417	0.00474	0.00509	0.00469	0.00467	0.00402	0.00532	0.00438	0.00504	0.00499	0.00594	0.00491
124.8	0.00388	0.00486	0.00505	0.00468	0.00438	0.00442	0.00519	0.00432	0.00478	0.0048	0.00548	0.00497
125.04	0.0041	0.00475	0.00502	0.00446	0.00437	0.00418	0.00542	0.00431	0.00508	0.00489	0.00585	0.00512
125.28	0.00388	0.00475	0.00506	0.00497	0.00442	0.00398	0.00515	0.00446	0.00495	0.00525	0.0058	0.00514
125.52	0.00429	0.00445	0.00505	0.00455	0.00456	0.00429	0.00524	0.0045	0.00476	0.00504	0.00585	0.0047
125.76	0.00408	0.00475	0.00509	0.00461	0.00428	0.00426	0.00506	0.00424	0.00496	0.00523	0.0058	0.00506
126	0.00427	0.00476	0.00503	0.00471	0.00462	0.00405	0.00562	0.00441	0.0048	0.00489	0.00562	0.0049
126.24	0.00408	0.00488	0.00512	0.0049	0.0045	0.00407	0.00527	0.00452	0.005	0.00505	0.00581	0.00472
126.48	0.0041	0.0049	0.00508	0.00506	0.00427	0.00395	0.00564	0.00447	0.00509	0.00495	0.00578	0.00534
126.72	0.0042	0.00442	0.00486	0.00517	0.00418	0.00411	0.00513	0.0042	0.00478	0.00501	0.00596	0.00513
126.96	0.00414	0.00482	0.00528	0.00464	0.0044	0.00413	0.00542	0.00434	0.0047	0.00509	0.00575	0.00516
127.2	0.00413	0.00481	0.00501	0.00471	0.00457	0.00438	0.00531	0.00424	0.00503	0.00483	0.00567	0.00534
127.44	0.00382	0.00455	0.00498	0.00456	0.0046	0.00427	0.00525	0.00425	0.00468	0.005	0.0055	0.00512
127.68	0.00405	0.0048	0.00489	0.00434	0.0044	0.00423	0.00548	0.00432	0.00463	0.00485	0.00584	0.00486
127.92	0.00404	0.00499	0.00494	0.00455	0.00451	0.00406	0.00542	0.00439	0.00477	0.00512	0.00569	0.00505
128.16	0.00383	0.00491	0.00497	0.00447	0.00424	0.00422	0.00534	0.00444	0.00486	0.00503	0.00598	0.00513
128.4	0.00395	0.00508	0.00488	0.00471	0.00448	0.00391	0.00506	0.00474	0.00511	0.00522	0.00594	0.00481
128.64	0.0039	0.00464	0.00487	0.00462	0.0044	0.00416	0.00518	0.0044	0.00482	0.00474	0.00587	0.0049
128.88	0.004	0.00477	0.00509	0.00484	0.00461	0.00384	0.00528	0.00402	0.00497	0.00485	0.00566	0.00492
129.12	0.00381	0.00469	0.00489	0.00447	0.00438	0.00435	0.00549	0.00437	0.00492	0.00479	0.00588	0.00497
129.36	0.00392	0.00508	0.00502	0.00448	0.00427	0.00409	0.00501	0.00473	0.00479	0.00531	0.00584	0.00501
129.6	0.00419	0.00485	0.00506	0.00466	0.00457	0.00451	0.00542	0.00437	0.00472	0.00506	0.00595	0.00499
129.84	0.00412	0.00464	0.00517	0.00463	0.0046	0.00424	0.00519	0.00434	0.00486	0.00506	0.00524	0.00493
130.08	0.00403	0.00486	0.00503	0.00482	0.00444	0.00405	0.00511	0.00439	0.00462	0.00491	0.00551	0.0049
130.32	0.00394	0.00473	0.00505	0.00459	0.00458	0.00416	0.00559	0.00456	0.00486	0.00481	0.0056	0.00489
130.56	0.00365	0.00448	0.00511	0.00436	0.00449	0.00422	0.00523	0.0044	0.00464	0.00503	0.00571	0.00479
130.8	0.00418	0.00467	0.00486	0.00457	0.00443	0.00414	0.00545	0.00449	0.00459	0.00475	0.00579	0.00511
131.04	0.00401	0.00448	0.00474	0.00468	0.00482	0.0041	0.00529	0.00455	0.00483	0.00472	0.00594	0.00522
131.28	0.0037	0.00511	0.00487	0.00477	0.00423	0.00425	0.00541	0.00438	0.00466	0.00503	0.00575	0.00512
131.52	0.0037	0.00476	0.0052	0.00489	0.00449	0.00419	0.00533	0.00439	0.00503	0.00511	0.00565	0.00501
131.76	0.00399	0.00493	0.00487	0.00476	0.00454	0.00388	0.00537	0.00419	0.00464	0.00481	0.00563	0.00488
132	0.00406	0.00475	0.00518	0.00493	0.00438	0.00393	0.00523	0.00443	0.00458	0.00495	0.00564	0.00505
132.24	0.00404	0.005	0.0052	0.00481	0.00455	0.0044	0.00573	0.00432	0.00456	0.00473	0.00576	0.0048
132.48	0.00403	0.00471	0.00483	0.00465	0.00439	0.00404	0.00532	0.00436	0.00477	0.00499	0.00596	0.00519
132.72	0.00436	0.0046	0.00513	0.00476	0.00444	0.00381	0.00513	0.00415	0.00473	0.00509	0.00556	0.00506
132.96	0.00427	0.00457	0.00515	0.00452	0.00436	0.00402	0.00546	0.00439	0.00493	0.00494	0.00592	0.00502
133.2	0.00426	0.00454	0.00519	0.00507	0.00447	0.00426	0.00514	0.00431	0.00512	0.00501	0.00569	0.00502
133.44	0.00417	0.00475	0.00496	0.00466	0.00467	0.00394	0.00514	0.00455	0.00463	0.00499	0.00576	0.00527
133.68	0.00405	0.00466	0.00508	0.00444	0.00456	0.00441	0.0055	0.00468	0.00479	0.00505	0.00593	0.0052
133.92	0.00379	0.00496	0.00488	0.0045	0.00436	0.00403	0.00533	0.00441	0.00459	0.00493	0.00572	0.00513
134.16	0.00385	0.00463	0.00476	0.00467	0.00452	0.00414	0.00529	0.00437	0.00498	0.00497	0.00583	0.00486
134.4	0.00377	0.00468	0.00504	0.0048	0.00457	0.00432	0.00504	0.00443	0.00489	0.00485	0.00568	0.00487
134.64	0.00424	0.00452	0.00498	0.00503	0.00447	0.0043	0.00513	0.00434	0.00482	0.00496	0.00565	0.00505
134.88	0.00405	0.00484	0.00493	0.00464	0.00457	0.0039	0.00521	0.00427	0.00491	0.0052	0.00572	0.00484
135.12	0.00405	0.0045	0.00498	0.00507	0.00427	0.00393	0.00503	0.00452	0.0048	0.00508	0.00565	0.00484
135.36	0.00396	0.00508	0.00482	0.00457	0.00453	0.00416	0.00552	0.00473	0.00504	0.00503	0.00612	0.00495
135.6	0.00396	0.00465	0.0048	0.00473	0.00425	0.00427	0.00525	0.00424	0.00472	0.00526	0.00584	0.00505
135.84	0.004	0.00504	0.00489	0.00464	0.00436	0.00394	0.00551	0.00447	0.00459	0.00492	0.00572	0.00479
136.08	0.00386	0.00491	0.00508	0.00451	0.00431	0.00401	0.00531	0.00454	0.00486	0.00474	0.00588	0.00506
136.32	0.00365	0.00485	0.00464	0.00466	0.00428	0.00409	0.00519	0.00456	0.00459	0.00513	0.00542	0.00502
136.56	0.00436	0.00485	0.00493	0.00462	0.00434	0.0039	0.00495	0.00426	0.0049	0.005	0.00611	0.00483
136.8	0.00364	0.00467	0.00522	0.00451	0.00446	0.00412	0.00522	0.00417	0.00484	0.00475	0.00534	0.00506
137.04	0.004	0.00439	0.00483	0.00483	0.00463	0.0042	0.0053	0.00436	0.0049	0.00508	0.00586	0.00482
137.28	0.00404	0.00452	0.00464	0.00484	0.00429	0.00416	0.00512	0.00449	0.00462	0.00509	0.00584	0.00494
137.52	0.00386	0.00459	0.00518	0.00508	0.00461	0.00422	0.00508	0.00415	0.00489	0.00526	0.00548	0.00481
137.76	0.00411	0.00476	0.00503	0.00469	0.00438	0.00393	0.00513	0.00443	0.00477	0.0051	0.00566	0.00496
138	0.00407	0.00474	0.00493	0.00487	0.00431	0.00399	0.00494	0.00436	0.00482	0.00493	0.00583	0.00482
138.24	0.00432	0.00469	0.00509	0.00462	0.00448	0.0043	0.00518	0.00463	0.00488	0.00506	0.00567	0.00506
138.48	0.00403	0.00477	0.00482	0.00467	0.00435	0.00425	0.00517	0.00433	0.00464	0.00513	0.0056	0.00494
138.72	0.00387	0.00463	0.00482	0.00471	0.00409	0.00394	0.00513	0.00437	0.00479	0.005	0.0055	0.00489
138.96	0.00407	0.00489	0.00475	0.00443	0.00437	0.00407	0.00526	0.00398	0.00445	0.005	0.00575	0.00503
139.2	0.00389	0.0048	0.0048	0.00462	0.00447	0.00413	0.00529	0.00424	0.00456	0.00504	0.00552	0.00479
139.44	0.004	0.00453	0.00482	0.00494	0.00447	0.00443	0.00523	0.00419	0.0045	0.0048	0.00577	0.00527
139.68	0.004	0.00503	0.00488	0.00507	0.00428	0.00411	0.00516	0.0044	0.00461	0.00478	0.00556	0.00479
139.92	0.00393	0.00451	0.00502	0.00465	0.00432	0.00414	0.00519	0.00451	0.00501	0.00488	0.00567	0.00469
140.16	0.00384	0.00474	0.005	0.00458	0.00443	0.00446	0.00528	0.00431	0.00455	0.00497	0.00548	0.00491
140.4	0.00377	0.00475	0.00481	0.00454	0.00445	0.00405	0.00511	0.00435	0.00455	0.00474	0.00528	0.00469
140.64	0.00355	0.00489	0.00484	0.00455	0.00417	0.00416	0.00543	0.00419	0.00455	0.00496	0.00577	0.0049
140.88	0.00419	0.00495	0.00509	0.00452	0.00424	0.00377	0.00521	0.00438	0.00456	0.00489	0.00577	0.00487
141.12	0.00399	0.00481	0.00476	0.0048	0.00419	0.00407	0.00548	0.00436	0.0049	0.00523	0.00562	0.00489
141.36	0.0038	0.0047	0.00501	0.00494	0.00456	0.00417	0.00528	0.00448	0.00463	0.00474	0.00585	0.00464
141.6	0.00382	0.00472	0.00474	0.00466	0.00439	0.00398	0.00496	0.00437	0.00479	0.00509	0.00578	0.00473
141.84	0.00421	0.00473	0.00484	0.00476	0.00464	0.00397	0.00531	0.00444	0.0045	0.00502	0.00557	0.00489
142.08	0.00379	0.00486	0.00473	0.00473	0.00444	0.00407	0.00513	0.00433	0.00453	0.00494	0.00559	0.00486
142.32	0.00395	0.00472	0.00478	0.00414	0.00465	0.00407	0.0049	0.00435	0.00474	0.00501	0.00574	0.00498
142.56	0.00371	0.00496	0.00489	0.00478	0.00433	0.00408	0.00537	0.00411	0.00463	0.00497	0.0054	0.00486
142.8	0.00423	0.0046	0.0048	0.00488	0.00447	0.00399	0.00522	0.00426	0.00453	0.00502	0.00585	0.00495
143.04	0.00373	0.00454	0.00486	0.00461	0.00432	0.00418	0.00494	0.00434	0.00466	0.00515	0.00588	0.00456
143.28	0.004	0.00496	0.00485	0.00482	0.00447	0.00387	0.00543	0.00403	0.00461	0.00477	0.00528	0.00509
143.52	0.00373	0.00473	0.005	0.00468	0.0045	0.00406	0.00536	0.00421	0.00444	0.00493	0.00553	0.00485
143.76	0.00393	0.00452	0.00478	0.00442	0.00445	0.00404	0.00484	0.0043	0.00457	0.0049	0.00526	0.00464
144	0.00391	0.00479	0.00497	0.00455	0.00459	0.00408	0.00543	0.00453	0.00461	0.00495	0.00578	0.00505
144.24	0.00409	0.00475	0.00482	0.00471	0.00462	0.00378	0.00546	0.00417	0.00485	0.00468	0.00568	0.00491
144.48	0.00402	0.00469	0.00501	0.00456	0.00452	0.00396	0.00487	0.00429	0.0045	0.00468	0.0057	0.00487
144.72	0.00381	0.00454	0.00478	0.00483	0.00434	0.00372	0.00484	0.00438	0.00446	0.0045	0.00571	0.00485
144.96	0.00402	0.00481	0.00501	0.00459	0.00431	0.00425	0.00496	0.00439	0.00442	0.00478	0.00562	0.00481
145.2	0.00365	0.00465	0.00467	0.00478	0.00428	0.00411	0.00513	0.00431	0.00444	0.0047	0.00576	0.00478
145.44	0.00399	0.00497	0.00494	0.00473	0.00438	0.00397	0.00531	0.00429	0.00489	0.00499	0.00559	0.00523
145.68	0.00387	0.00487	0.00505	0.00456	0.00437	0.00381	0.00522	0.00405	0.00469	0.00482	0.00578	0.00503
145.92	0.0037	0.00491	0.00509	0.00463	0.00414	0.00396	0.00536	0.00457	0.0049	0.00509	0.00585	0.0048
146.16	0.00383	0.00473	0.00504	0.00472	0.00423	0.00377	0.00533	0.00448	0.00455	0.00532	0.00561	0.00476
146.4	0.00387	0.00472	0.00504	0.00479	0.00433	0.00423	0.0054	0.00433	0.00478	0.0049	0.00575	0.00482
146.64	0.00408	0.00482	0.00511	0.00473	0.00414	0.00383	0.00528	0.00454	0.00465	0.00518	0.00568	0.00521
146.88	0.0037	0.00466	0.00459	0.00473	0.0043	0.00422	0.0053	0.00414	0.0049	0.00503	0.00572	0.00506
147.12	0.00401	0.00498	0.00497	0.00462	0.00425	0.00408	0.00485	0.00445	0.00468	0.0046	0.00573	0.00464
147.36	0.00377	0.00458	0.00462	0.00478	0.00426	0.00414	0.00527	0.00427	0.0048	0.00534	0.00559	0.00485
147.6	0.0039	0.00448	0.00487	0.00463	0.0043	0.00381	0.005	0.00416	0.00465	0.00495	0.00558	0.0049
147.84	0.00366	0.00483	0.00481	0.00463	0.00427	0.00417	0.00543	0.00434	0.00455	0.00491	0.00552	0.00474
148.08	0.00405	0.00455	0.0047	0.00463	0.00392	0.00415	0.00511	0.0043	0.00434	0.00475	0.00578	0.00517
148.32	0.00384	0.00471	0.00477	0.00442	0.00424	0.00416	0.00531	0.00458	0.00475	0.00483	0.00561	0.00493
148.56	0.00432	0.00454	0.00494	0.00458	0.00417	0.00414	0.00501	0.00466	0.00465	0.00483	0.00571	0.00451
148.8	0.00386	0.00444	0.00487	0.00485	0.00417	0.00372	0.00498	0.00418	0.00442	0.00472	0.00552	0.00506
149.04	0.00376	0.00488	0.00509	0.00444	0.00427	0.00383	0.00526	0.00429	0.00467	0.00499	0.0056	0.00501
149.28	0.004	0.00461	0.00503	0.00434	0.00436	0.00368	0.0055	0.0044	0.00438	0.00475	0.00528	0.0048
149.52	0.0036	0.00455	0.00484	0.00435	0.00423	0.0041	0.00547	0.00414	0.0046	0.00486	0.00561	0.00478
149.76	0.00383	0.00474	0.00471	0.00504	0.00434	0.00399	0.00542	0.00448	0.00448	0.00487	0.0054	0.00492
150	0.00425	0.0048	0.00509	0.00463	0.00459	0.00413	0.00568	0.00478	0.00492	0.00518	0.00537	0.00512
150.24	0.00436	0.00537	0.0052	0.0048	0.00449	0.00454	0.00533	0.00442	0.00489	0.00523	0.00582	0.00512
150.48	0.00432	0.00485	0.0049	0.00474	0.00463	0.00406	0.0057	0.00434	0.00492	0.00499	0.00596	0.00498
150.72	-0.00253	-0.00234	-0.00196	-0.00279	-0.00227	-0.00358	-0.00235	-0.00291	-0.00237	-0.00253	-0.00179	-0.00325
150.96	-0.02965	-0.03171	-0.03094	-0.03486	-0.03193	-0.03482	-0.03435	-0.03329	-0.03182	-0.03385	-0.03329	-0.03601
151.2	0.01845	0.02027	0.01973	0.01809	0.01567	0.01681	0.01654	0.02126	0.01595	0.01785	0.01632	0.01787
151.44	-0.00727	-0.00721	-0.00658	-0.00859	-0.00835	-0.00955	-0.00862	-0.00771	-0.00803	-0.0089	-0.00679	-0.00716
151.68	0.00424	0.00517	0.00526	0.0048	0.0047	0.00461	0.00571	0.00471	0.00493*	0.00532*	0.00797*	0.00751*
151.92	0.00413	0.00472	0.005	0.00459	0.00477	0.00446	0.00529	0.00451	0.00498	0.00498	0.00574	0.00521
152.16	0.00456	0.00497	0.00516	0.00498	0.00468	0.00423	0.00505	0.00441	0.00499	0.00489	0.00569	0.00486
152.4	0.0043	0.00502	0.00533	0.00464	0.00479	0.00421	0.00525	0.00435	0.00469	0.00498	0.00571	0.00512
152.64	0.00462	0.00521	0.0051	0.00483	0.00446	0.00396	0.0053	0.00429	0.00468	0.005	0.0057	0.00491
152.88	0.0045	0.00501	0.00507	0.00483	0.00472	0.00419	0.00541	0.00454	0.00494	0.00476	0.00579	0.00491
153.12	0.00458	0.00502	0.00501	0.00457	0.00467	0.00401	0.00509	0.00442	0.00476	0.00496	0.00528	0.00512
153.36	0.00466	0.00517	0.00477	0.00452	0.0046	0.00396	0.00511	0.00426	0.0048	0.00497	0.00546	0.00464
153.6	0.00455	0.00487	0.00511	0.005	0.00469	0.00417	0.0053	0.00424	0.00437	0.00474	0.00551	0.00502
153.84	0.0042	0.00514	0.00503	0.00436	0.00483	0.00408	0.00532	0.0043	0.0051	0.00506	0.00524	0.00517
154.08	0.00436	0.00521	0.00505	0.00504	0.00461	0.00401	0.00535	0.00435	0.00478	0.0048	0.00527	0.00487
154.32	0.00425	0.00498	0.00526	0.00471	0.00466	0.00414	0.00525	0.00435	0.00487	0.0051	0.0051	0.00466
154.56	0.00437	0.00522	0.00505	0.00468	0.00441	0.00414	0.00549	0.00446	0.00467	0.00469	0.00515	0.005
154.8	0.00432	0.00541	0.00502	0.00465	0.00474	0.004	0.00498	0.00444	0.00467	0.00454	0.00561	0.0048
155.04	0.00444	0.00532	0.00522	0.00437	0.00471	0.00388	0.00501	0.00425	0.00458	0.00491	0.00562	0.00476
155.28	0.00453	0.00494	0.00538	0.00472	0.0046	0.00419	0.00495	0.00432	0.00455	0.00475	0.00559	0.00489
155.52	0.0046	0.00501	0.00495	0.00479	0.00462	0.0041	0.00513	0.0042	0.00489	0.0048	0.005	0.00489
155.76	0.00439	0.00475	0.00499	0.00473	0.0045	0.00412	0.00538	0.00446	0.00458	0.00469	0.00531	0.00483
156	0.00419	0.00503	0.00508	0.00472	0.00472	0.00397	0.00536	0.00442	0.00479	0.0046	0.00524	0.00457
156.24	0.00479	0.00498	0.00554	0.00458	0.00449	0.00425	0.00511	0.00431	0.0046	0.00484	0.00492	0.00487
156.48	0.0044	0.00513	0.00512	0.00446	0.00432	0.00415	0.0051	0.00443	0.00459	0.00443	0.00501	0.00484
156.72	0.00445	0.00466	0.00523	0.00468	0.00446	0.0041	0.00525	0.00413	0.00468	0.00457	0.00507	0.00471
156.96	0.00461	0.00501	0.00523	0.00468	0.00454	0.00398	0.00506	0.0043	0.00451	0.00455	0.00507	0.0047
157.2	0.0044	0.00489	0.0055	0.00448	0.00466	0.00395	0.00539	0.0043	0.00478	0.00446	0.00502	0.00477
157.44	0.00454	0.00519	0.00551	0.00499	0.00451	0.0044	0.00502	0.00422	0.00476	0.00457	0.00517	0.00432
157.68	0.00439	0.00498	0.00512	0.00447	0.00461	0.00385	0.00504	0.00445	0.00488	0.0045	0.00501	0.00445
157.92	0.00405	0.0048	0.00478	0.00449	0.00461	0.00415	0.00522	0.00451	0.00459	0.00416	0.00498	0.00445
158.16	0.00441	0.00508	0.00529	0.0046	0.00448	0.00404	0.00498	0.0044	0.00471	0.00431	0.00523	0.00454
158.4	0.00447	0.00494	0.00543	0.00442	0.00462	0.00425	0.00498	0.00402	0.00457	0.00455	0.00509	0.00446
158.64	0.00436	0.00486	0.00512	0.00472	0.00429	0.00407	0.0054	0.00444	0.00464	0.00482	0.00474	0.0044
158.88	0.00443	0.00515	0.0048	0.00448	0.00453	0.00399	0.00515	0.00443	0.00468	0.00424	0.00504	0.00466
159.12	0.00438	0.00505	0.00498	0.0045	0.00459	0.00389	0.00504	0.00408	0.00465	0.00469	0.00498	0.00468
159.36	0.00434	0.00485	0.00522	0.00441	0.00473	0.00393	0.005	0.00418	0.0045	0.00442	0.00482	0.00459
159.6	0.00459	0.00492	0.00522	0.00462	0.00434	0.00391	0.00506	0.00409	0.00423	0.00437	0.00504	0.0043
159.84	0.0044	0.00496	0.00526	0.00463	0.00438	0.00405	0.00516	0.0041	0.00442	0.0046	0.00486	0.00455
160.08	0.00409	0.00481	0.00525	0.00418	0.0045	0.00368	0.005	0.00444	0.00451	0.00425	0.00479	0.00442
160.32	0.00432	0.00463	0.00506	0.00467	0.00419	0.00405	0.00495	0.00436	0.00443	0.00438	0.00486	0.00448
160.56	0.00428	0.00472	0.00512	0.00469	0.00441	0.00401	0.00518	0.00441	0.00429	0.00425	0.00495	0.00409
160.8	0.0044	0.00512	0.00498	0.00491	0.00444	0.0038	0.00505	0.00411	0.00416	0.00438	0.00466	0.00464
161.04	0.00439	0.00505	0.00552	0.00464	0.00428	0.0039	0.00519	0.00414	0.00436	0.00445	0.0046	0.00442
161.28	0.00446	0.00486	0.00538	0.00442	0.00444	0.00376	0.00497	0.00411	0.00432	0.004	0.00454	0.0045
161.52	0.00435	0.00473	0.00522	0.00442	0.00446	0.00397	0.00501	0.00414	0.00424	0.00431	0.00477	0.00437
161.76	0.0044	0.00504	0.00526	0.00433	0.00445	0.00374	0.00518	0.00417	0.00463	0.00434	0.00439	0.00426
162	0.00453	0.00517	0.00515	0.00433	0.0043	0.00401	0.00507	0.00426	0.00446	0.00448	0.00474	0.00447
162.24	0.00427	0.00495	0.00503	0.00477	0.0046	0.00416	0.00499	0.00405	0.00432	0.00433	0.005	0.0047
162.48	0.00424	0.00505	0.00544	0.00469	0.00421	0.00387	0.00488	0.00405	0.0042	0.00412	0.00485	0.00445
162.72	0.00422	0.00493	0.00518	0.0045	0.00461	0.00402	0.00517	0.00419	0.00389	0.00416	0.00481	0.00447
162.96	0.00428	0.00519	0.00494	0.00468	0.00463	0.0038	0.00501	0.00432	0.00424	0.00432	0.00482	0.00428
163.2	0.00435	0.00468	0.0053	0.00414	0.00439	0.00404	0.00508	0.00402	0.0041	0.00395	0.00472	0.00412
163.44	0.00413	0.00484	0.00496	0.00451	0.00438	0.00376	0.00516	0.00432	0.00428	0.00413	0.00459	0.0042
163.68	0.0046	0.00467	0.00505	0.00394	0.00433	0.00388	0.00515	0.00419	0.00418	0.00391	0.00477	0.00441
163.92	0.00426	0.00479	0.00465	0.00427	0.00424	0.00376	0.00512	0.00411	0.00403	0.00418	0.00466	0.00424
164.16	0.00431	0.00501	0.00523	0.00446	0.00449	0.00394	0.005	0.00424	0.00413	0.00396	0.00443	0.00421
164.4	0.00438	0.00481	0.00526	0.00453	0.00427	0.00377	0.00511	0.00427	0.00423	0.00433	0.00462	0.0044
164.64	0.00405	0.00502	0.00514	0.0044	0.00443	0.00402	0.00497	0.00407	0.00404	0.00416	0.00405	0.00433
164.88	0.00417	0.00501	0.0052	0.00434	0.0049	0.00377	0.00547	0.00406	0.004	0.00403	0.00476	0.00417
165.12	0.00409	0.00472	0.00498	0.00434	0.00402	0.00389	0.00495	0.00435	0.00411	0.00403	0.00475	0.00415
165.36	0.00427	0.00495	0.00503	0.0045	0.00438	0.00403	0.00469	0.00406	0.00419	0.00408	0.00457	0.0044
165.6	0.00439	0.00483	0.0052	0.00442	0.00465	0.00396	0.00469	0.00442	0.00401	0.00407	0.00469	0.00454
165.84	0.00401	0.00501	0.00525	0.00438	0.00411	0.00389	0.00502	0.00412	0.00444	0.0041	0.00459	0.00431
166.08	0.00455	0.00476	0.00522	0.00442	0.00445	0.00414	0.00514	0.00409	0.00392	0.0042	0.00467	0.00391
166.32	0.00414	0.00502	0.00539	0.00441	0.00443	0.00373	0.00511	0.00397	0.00416	0.00414	0.00435	0.00412
166.56	0.00452	0.005	0.00517	0.00401	0.00437	0.00403	0.00495	0.00418	0.00405	0.00402	0.00458	0.00414
166.8	0.00419	0.00486	0.00519	0.00485	0.00453	0.00406	0.00506	0.00393	0.00402	0.00396	0.00482	0.00414
167.04	0.00444	0.00494	0.00522	0.00475	0.00458	0.00404	0.00483	0.00411	0.004	0.00386	0.00457	0.00396
167.28	0.00444	0.00455	0.00528	0.00401	0.0045	0.00384	0.00482	0.00395	0.00383	0.00413	0.00459	0.0044
167.52	0.00423	0.00474	0.00483	0.00456	0.00428	0.0037	0.00527	0.00403	0.004	0.00397	0.00448	0.00435
167.76	0.00444	0.00477	0.00508	0.00454	0.00434	0.00374	0.00473	0.00422	0.00398	0.00407	0.00455	0.00429
168	0.00453	0.00481	0.00501	0.00419	0.00445	0.00378	0.00472	0.00422	0.00409	0.00399	0.00425	0.00413
168.24	0.00425	0.00526	0.0052	0.00435	0.00438	0.0039	0.00499	0.00396	0.00393	0.00404	0.00447	0.0042
168.48	0.00433	0.00482	0.00511	0.0043	0.00473	0.00387	0.00473	0.00377	0.00404	0.00413	0.0045	0.00425
168.72	0.00424	0.00473	0.00502	0.00451	0.00437	0.00382	0.00498	0.00401	0.00398	0.00399	0.0043	0.00399
168.96	0.00412	0.00504	0.00492	0.00467	0.00413	0.00386	0.005	0.00384	0.00411	0.00394	0.00432	0.00418
169.2	0.00413	0.00515	0.00518	0.00456	0.00441	0.00416	0.00481	0.00404	0.00387	0.00441	0.0042	0.00431
169.44	0.0041	0.00474	0.00507	0.00427	0.00469	0.00388	0.00472	0.00388	0.00381	0.0035	0.0043	0.00399
169.68	0.00414	0.00484	0.00552	0.00427	0.00429	0.00398	0.00524	0.00405	0.00406	0.0037	0.00435	0.00422
169.92	0.00395	0.0049	0.00518	0.00412	0.00433	0.00406	0.00478	0.00453	0.00399	0.0037	0.00411	0.0042
170.16	0.00429	0.00492	0.00518	0.00405	0.00422	0.00355	0.0051	0.00417	0.00387	0.00393	0.00428	0.00397
170.4	0.00408	0.00462	0.00517	0.00411	0.00423	0.00368	0.00508	0.00402	0.00398	0.00379	0.00415	0.00414
170.64	0.00461	0.00455	0.0052	0.00456	0.00431	0.00402	0.00506	0.00375	0.00379	0.00354	0.00421	0.004
170.88	0.00407	0.00485	0.00511	0.00466	0.00446	0.00381	0.00496	0.00397	0.00381	0.00352	0.0043	0.00406
171.12	0.00436	0.00501	0.00553	0.00418	0.00442	0.00366	0.00509	0.00399	0.00402	0.00379	0.00422	0.00454
171.36	0.00423	0.00481	0.00497	0.00467	0.00436	0.00388	0.00494	0.00388	0.00376	0.00388	0.00422	0.00426
171.6	0.00444	0.00458	0.00499	0.00448	0.00451	0.00399	0.00473	0.0042	0.00367	0.00375	0.00447	0.00389
171.84	0.0043	0.00502	0.00508	0.00424	0.00429	0.00393	0.00455	0.00399	0.00402	0.0039	0.0039	0.00391
172.08	0.00455	0.00491	0.00515	0.00425	0.00469	0.00378	0.00469	0.00414	0.00375	0.00388	0.00428	0.00406
172.32	0.00438	0.0047	0.00529	0.00428	0.0044	0.00396	0.00507	0.00432	0.00368	0.00395	0.0043	0.00396
172.56	0.00422	0.00521	0.00503	0.00415	0.00428	0.00353	0.00481	0.00418	0.00357	0.00376	0.00396	0.00402
172.8	0.00434	0.00493	0.00548	0.00417	0.00435	0.00348	0.00479	0.00388	0.00379	0.00374	0.00415	0.00391
173.04	0.0045	0.00487	0.00558	0.00427	0.00437	0.00352	0.00469	0.00378	0.00366	0.00359	0.0043	0.00383
173.28	0.00428	0.00481	0.00526	0.00398	0.00436	0.00377	0.00487	0.00396	0.00353	0.00354	0.00431	0.00401
173.52	0.00419	0.00505	0.00493	0.00435	0.00448	0.00349	0.00475	0.00422	0.00386	0.00357	0.00392	0.0038
173.76	0.00413	0.00515	0.00543	0.00428	0.00442	0.00375	0.00484	0.00397	0.00364	0.00383	0.00414	0.00382
174	0.00422	0.00473	0.00515	0.00421	0.00434	0.00379	0.00488	0.00387	0.00368	0.00386	0.0041	0.00382
174.24	0.00441	0.00479	0.0052	0.00435	0.00421	0.00384	0.00492	0.00392	0.00393	0.00355	0.00382	0.00397
174.48	0.00427	0.00479	0.00543	0.00424	0.00442	0.00347	0.00475	0.00406	0.0038	0.00372	0.00417	0.00394
174.72	0.00411	0.00478	0.00503	0.00432	0.00403	0.00379	0.00498	0.00378	0.0037	0.00376	0.0041	0.0039
174.96	0.00422	0.00498	0.00495	0.00434	0.00441	0.0037	0.00462	0.00406	0.0036	0.00366	0.00425	0.00403
175.2	0.00408	0.0045	0.00483	0.00416	0.00431	0.0036	0.00473	0.004	0.00372	0.00394	0.004	0.00393
175.44	0.00406	0.00495	0.00495	0.00408	0.00414	0.00378	0.00495	0.00419	0.00368	0.00374	0.00424	0.00374
175.68	0.00424	0.00467	0.00519	0.00407	0.00417	0.00352	0.00493	0.00385	0.00352	0.0039	0.00432	0.00402
175.92	0.00416	0.00473	0.00501	0.00429	0.00412	0.00378	0.00463	0.00386	0.00368	0.00346	0.00425	0.00392
176.16	0.0041	0.00486	0.00529	0.00405	0.00418	0.00408	0.00473	0.00413	0.00378	0.00379	0.00396	0.00384
176.4	0.00418	0.00494	0.00532	0.00415	0.0042	0.00378	0.00491	0.00379	0.00346	0.00381	0.00378	0.00367
176.64	0.00415	0.00481	0.0052	0.00434	0.00427	0.00334	0.00489	0.00391	0.00367	0.00375	0.00442	0.00405
176.88	0.00431	0.0048	0.0048	0.00439	0.00415	0.00355	0.00482	0.00393	0.00395	0.004	0.00403	0.00378
177.12	0.00422	0.00488	0.00497	0.00417	0.00435	0.00347	0.00481	0.00393	0.00384	0.00358	0.0041	0.00401
177.36	0.00412	0.00491	0.00507	0.00451	0.00426	0.00368	0.00515	0.00381	0.00397	0.00372	0.00385	0.00392
177.6	0.00421	0.00484	0.00518	0.00433	0.00418	0.00407	0.00452	0.00406	0.00371	0.00385	0.00394	0.00398
177.84	0.00423	0.00494	0.0051	0.00419	0.00437	0.00364	0.00453	0.0039	0.00347	0.00361	0.00409	0.004
178.08	0.00427	0.00493	0.00492	0.00452	0.00412	0.00374	0.00463	0.00374	0.00364	0.00334	0.00411	0.00381
178.32	0.00429	0.00502	0.00533	0.00441	0.00398	0.00402	0.00488	0.00414	0.00358	0.0036	0.00404	0.00402
178.56	0.00441	0.00462	0.00511	0.00477	0.00422	0.00364	0.00485	0.00417	0.00359	0.00361	0.00393	0.00388
178.8	0.00431	0.00472	0.00485	0.00409	0.00418	0.00387	0.00508	0.00397	0.00341	0.0037	0.00395	0.00386
179.04	0.00409	0.00452	0.00523	0.00424	0.00452	0.00404	0.00485	0.00385	0.00343	0.00351	0.00428	0.00391
179.28	0.00416	0.0049	0.00519	0.00409	0.00448	0.00373	0.00463	0.0039	0.00366	0.0036	0.00432	0.00362
179.52	0.00423	0.00446	0.00527	0.00433	0.00402	0.00383	0.00459	0.00388	0.00349	0.00358	0.00408	0.00389
179.76	0.00418	0.00496	0.00502	0.00431	0.00408	0.00381	0.00482	0.00399	0.00362	0.00343	0.00383	0.0039
180	0.00413	0.00475	0.00486	0.00421	0.00435	0.00367	0.00458	0.00398	0.00363	0.00367	0.00405	0.00363
180.24	0.00388	0.00482	0.00506	0.0044	0.00406	0.00358	0.00473	0.00415	0.00352	0.00369	0.00406	0.00376
180.48	0.00438	0.00484	0.00495	0.00454	0.00393	0.00335	0.00488	0.0039	0.00357	0.00372	0.00419	0.00387
180.72	0.00405	0.00492	0.00515	0.00455	0.0043	0.00392	0.00515	0.00397	0.00325	0.00367	0.00382	0.00393
180.96	0.00357	0.00496	0.00506	0.00424	0.00422	0.00369	0.00517	0.00365	0.00336	0.00333	0.0036	0.00345
181.2	0.00443	0.00478	0.00495	0.00416	0.00404	0.0038	0.00486	0.00385	0.00395	0.00377	0.00413	0.00387
181.44	0.00425	0.00484	0.00516	0.00416	0.00447	0.00371	0.00489	0.00414	0.00348	0.00367	0.00406	0.00365
181.68	0.00413	0.00481	0.00458	0.0045	0.00427	0.00337	0.00455	0.00389	0.00377	0.00352	0.00399	0.00367
181.92	0.00431	0.00485	0.005	0.00421	0.00404	0.00394	0.00469	0.00415	0.00374	0.00334	0.00408	0.00362
182.16	0.00407	0.00499	0.00517	0.00419	0.00424	0.00378	0.0049	0.00394	0.00327	0.00335	0.00404	0.00359
182.4	0.00433	0.0049	0.00539	0.00442	0.00453	0.00346	0.00502	0.00372	0.00314	0.00357	0.00375	0.00365
182.64	0.00398	0.00484	0.00489	0.00403	0.00431	0.00367	0.00485	0.00416	0.00349	0.00353	0.00366	0.0036
182.88	0.004	0.00478	0.00529	0.00425	0.00406	0.0035	0.00466	0.00388	0.00336	0.00317	0.00405	0.00366
183.12	0.00429	0.00472	0.00494	0.00419	0.00422	0.00313	0.00469	0.00387	0.00351	0.00375	0.00423	0.00393
183.36	0.00395	0.00504	0.00546	0.0038	0.00412	0.00341	0.00456	0.00403	0.00373	0.00346	0.00378	0.00356
183.6	0.00416	0.00458	0.00493	0.00426	0.00395	0.00368	0.00487	0.00394	0.00343	0.00373	0.00412	0.00364
183.84	0.00412	0.00454	0.00474	0.00437	0.00394	0.00367	0.00463	0.00426	0.00339	0.00358	0.00394	0.00364
184.08	0.00407	0.00474	0.00521	0.0041	0.0041	0.00356	0.00462	0.00372	0.00354	0.00329	0.00383	0.00359
184.32	0.004	0.00474	0.0052	0.00447	0.00442	0.00369	0.00486	0.00379	0.00327	0.00316	0.00376	0.00364
184.56	0.00383	0.00467	0.00496	0.00409	0.00398	0.00365	0.00487	0.00412	0.00325	0.00351	0.00385	0.004
184.8	0.00401	0.00475	0.00512	0.0046	0.00424	0.00352	0.00451	0.00381	0.00339	0.00348	0.00393	0.00378
185.04	0.0041	0.00494	0.00515	0.00423	0.00438	0.0037	0.00452	0.00391	0.00315	0.00383	0.00382	0.00367
185.28	0.00427	0.00484	0.00507	0.00406	0.004	0.00365	0.00492	0.00409	0.00351	0.0032	0.00383	0.00351
185.52	0.00371	0.00464	0.00512	0.0042	0.00403	0.00383	0.00482	0.00398	0.0035	0.00355	0.00409	0.00388
185.76	0.0043	0.00497	0.00499	0.00398	0.00433	0.00346	0.00473	0.00385	0.0033	0.00379	0.00393	0.00385
186	0.00434	0.00499	0.00512	0.00402	0.0041	0.00356	0.00466	0.00378	0.00354	0.00384	0.00377	0.00376
186.24	0.00417	0.00503	0.00548	0.00384	0.00414	0.00354	0.00491	0.00383	0.00335	0.00349	0.00402	0.0035
186.48	0.00426	0.0051	0.00518	0.00382	0.00427	0.00337	0.00468	0.00388	0.00357	0.00355	0.00399	0.00379
186.72	0.00404	0.00486	0.00506	0.00416	0.00405	0.00352	0.0046	0.00387	0.00322	0.00362	0.00365	0.00375
186.96	0.00414	0.00469	0.005	0.00412	0.00387	0.00359	0.00453	0.00362	0.00349	0.00303	0.00381	0.00372
187.2	0.00394	0.00482	0.00493	0.00373	0.00425	0.00372	0.00445	0.00367	0.00342	0.00323	0.00368	0.00344
187.44	0.00414	0.00482	0.00495	0.00399	0.00449	0.00391	0.00493	0.00411	0.00344	0.00324	0.00414	0.00369
187.68	0.004	0.00473	0.00507	0.00424	0.00397	0.00358	0.00466	0.0039	0.00332	0.00344	0.00397	0.00372
187.92	0.00406	0.00469	0.00479	0.004	0.00377	0.00386	0.00482	0.00382	0.00343	0.00342	0.00371	0.00351
188.16	0.00429	0.00461	0.00517	0.00455	0.0039	0.00371	0.00472	0.00396	0.00322	0.00351	0.00383	0.00403
188.4	0.00431	0.00487	0.00497	0.00437	0.00434	0.00377	0.0046	0.00401	0.00322	0.00374	0.00355	0.0036
188.64	0.00399	0.00464	0.00489	0.00445	0.00419	0.00352	0.00455	0.00368	0.00329	0.00342	0.00384	0.00371
188.88	0.00394	0.00503	0.0049	0.00402	0.00392	0.00354	0.00481	0.00403	0.00333	0.00351	0.00418	0.00379
189.12	0.00386	0.00482	0.00519	0.0043	0.00403	0.00383	0.0045	0.00359	0.00327	0.00372	0.00356	0.00365
189.36	0.00394	0.00463	0.00527	0.00459	0.00407	0.00366	0.00479	0.00371	0.00338	0.00332	0.00391	0.00345
189.6	0.00423	0.00494	0.00507	0.00418	0.00405	0.00337	0.00468	0.00381	0.00363	0.00349	0.00357	0.00348
189.84	0.00399	0.00451	0.00494	0.00415	0.00407	0.00333	0.00473	0.00422	0.00342	0.00293	0.0036	0.00382
190.08	0.00405	0.00465	0.00512	0.00406	0.00372	0.00357	0.00459	0.00382	0.00328	0.0033	0.00377	0.00356
190.32	0.00411	0.00483	0.00517	0.00392	0.00401	0.00358	0.0046	0.00416	0.00292	0.00357	0.00406	0.00341
190.56	0.00403	0.00481	0.00497	0.00381	0.00418	0.00373	0.00472	0.00407	0.00351	0.00328	0.0038	0.00366
190.8	0.00406	0.00446	0.00486	0.00421	0.00402	0.00356	0.00455	0.00389	0.00356	0.00348	0.00404	0.00359
191.04	0.00426	0.00493	0.00518	0.00425	0.00413	0.00344	0.00483	0.00383	0.00326	0.00318	0.00383	0.00361
191.28	0.00365	0.0047	0.00488	0.00404	0.00427	0.00386	0.00436	0.00366	0.00344	0.00356	0.00403	0.0037
191.52	0.00383	0.00479	0.005	0.00387	0.00433	0.0034	0.00466	0.00372	0.00344	0.00341	0.00373	0.00339
191.76	0.00414	0.00484	0.00508	0.00416	0.00355	0.00364	0.00474	0.00388	0.00347	0.00348	0.00365	0.00382
192	0.00405	0.00471	0.00518	0.00401	0.00455	0.00345	0.00484	0.00379	0.00304	0.00339	0.00389	0.00368
192.24	0.00419	0.0048	0.00529	0.00425	0.00401	0.00366	0.00458	0.00396	0.00331	0.00332	0.00361	0.00362
192.48	0.00404	0.00457	0.005	0.00392	0.00418	0.00336	0.00476	0.0039	0.00318	0.00333	0.00367	0.00347
192.72	0.00396	0.00471	0.00492	0.00379	0.00406	0.00343	0.00438	0.0038	0.00338	0.00335	0.00384	0.00363
192.96	0.00423	0.00481	0.00496	0.00394	0.00418	0.00331	0.0048	0.00408	0.00328	0.00335	0.00367	0.00355
193.2	0.00379	0.0049	0.00518	0.00398	0.00395	0.00344	0.0046	0.0039	0.0034	0.00333	0.0036	0.0033
193.44	0.00422	0.00463	0.00468	0.00427	0.0042	0.00309	0.00426	0.00395	0.00317	0.00328	0.00365	0.00323
193.68	0.00415	0.00471	0.00497	0.00428	0.00428	0.00359	0.00445	0.00388	0.00308	0.00311	0.00358	0.00345
193.92	0.00378	0.0047	0.00512	0.00421	0.00407	0.00352	0.0048	0.00397	0.00314	0.00358	0.00366	0.00379
194.16	0.00392	0.00478	0.00494	0.00392	0.00428	0.00355	0.00471	0.00379	0.00321	0.00358	0.00396	0.00373
194.4	0.00415	0.00482	0.00472	0.00381	0.0043	0.00349	0.00434	0.00402	0.0036	0.00339	0.00376	0.00371
194.64	0.00425	0.00459	0.00494	0.0043	0.00391	0.0035	0.00468	0.0039	0.00348	0.00342	0.00356	0.00351
194.88	0.00393	0.00464	0.00494	0.00412	0.00397	0.00357	0.00482	0.0041	0.00368	0.00319	0.00379	0.00378
195.12	0.00388	0.00457	0.00509	0.00408	0.004	0.00331	0.00488	0.00361	0.00319	0.00325	0.00341	0.00376
195.36	0.00441	0.00485	0.00488	0.00425	0.0042	0.00354	0.00465	0.00347	0.00328	0.00346	0.00396	0.00367
195.6	0.00408	0.00481	0.0046	0.00424	0.00411	0.00342	0.00423	0.00393	0.00324	0.0033	0.00394	0.00333
195.84	0.00414	0.00465	0.00498	0.00413	0.00396	0.00365	0.00478	0.00393	0.00302	0.00311	0.00321	0.00363
196.08	0.00408	0.00484	0.00491	0.00428	0.00409	0.00329	0.00459	0.00393	0.00321	0.00363	0.00401	0.00367
196.32	0.00434	0.00476	0.00488	0.004	0.00389	0.00367	0.00442	0.00363	0.00318	0.00357	0.00353	0.00378
196.56	0.00413	0.00483	0.00464	0.00447	0.00384	0.00332	0.00459	0.00384	0.00354	0.00307	0.00359	0.00339
196.8	0.00406	0.00474	0.00493	0.00397	0.00379	0.00338	0.00436	0.00388	0.00341	0.00334	0.00377	0.00349
197.04	0.0038	0.0044	0.00472	0.00408	0.00412	0.00335	0.0047	0.00405	0.00306	0.00332	0.00342	0.00353
197.28	0.00416	0.00459	0.0049	0.00393	0.00428	0.00322	0.00443	0.004	0.00331	0.00344	0.00353	0.00328
197.52	0.00405	0.00501	0.00478	0.0042	0.00406	0.00368	0.00468	0.0039	0.00321	0.00343	0.00358	0.00374
197.76	0.00395	0.0047	0.00501	0.00393	0.00402	0.0035	0.00492	0.00354	0.00329	0.00362	0.00337	0.00331
198	0.00401	0.00465	0.00502	0.00397	0.00423	0.00365	0.00456	0.00388	0.0032	0.00334	0.00359	0.00345
198.24	0.00388	0.00467	0.00495	0.00361	0.00407	0.00361	0.00455	0.00372	0.00333	0.00305	0.00354	0.00345
198.48	0.00433	0.00488	0.00488	0.00376	0.00426	0.00377	0.00477	0.00343	0.00321	0.00326	0.00375	0.00375
198.72	0.00396	0.00442	0.00479	0.00384	0.00388	0.00353	0.0047	0.00371	0.00324	0.00336	0.00338	0.00383
198.96	0.00399	0.00459	0.00488	0.00385	0.00374	0.00335	0.00418	0.00369	0.00313	0.00336	0.00366	0.00348
199.2	0.0037	0.00482	0.00497	0.00408	0.00393	0.00329	0.00474	0.00392	0.00341	0.0032	0.0037	0.00355
199.44	0.00417	0.00475	0.005	0.00389	0.0039	0.00338	0.00439	0.00378	0.0029	0.00326	0.00375	0.00356
199.68	0.00419	0.00452	0.00519	0.00402	0.00396	0.00358	0.00448	0.00382	0.00293	0.00339	0.00346	0.00352
199.92	0.00388	0.00497	0.00484	0.00402	0.00396	0.00366	0.00454	0.00383	0.00312	0.00338	0.00352	0.00329
200.16	0.00383	0.00517	0.00513	0.00437	0.00423	0.00346	0.00434	0.00368	0.00311	0.00315	0.00374	0.00341
200.4	0.00365	0.00463	0.00497	0.00408	0.00387	0.00315	0.00427	0.00381	0.00331	0.00314	0.00337	0.00363
200.64	0.00388	0.00468	0.00471	0.00419	0.00399	0.00353	0.00469	0.00351	0.00298	0.00319	0.00338	0.00361
200.88	0.00363	0.0044	0.00482	0.00405	0.00391	0.00336	0.00451	0.00396	0.00327	0.00349	0.00378	0.00316
201.12	0.00408	0.0045	0.00504	0.0041	0.00387	0.00348	0.00485	0.00369	0.00295	0.00369	0.00368	0.00341
201.36	0.00413	0.00449	0.00496	0.00395	0.0038	0.0032	0.00493	0.00384	0.00316	0.00343	0.00346	0.00348
201.6	0.00375	0.00464	0.00474	0.004	0.00406	0.00341	0.00433	0.00381	0.00276	0.00335	0.00343	0.00343
201.84	0.00393	0.00466	0.00482	0.0038	0.00385	0.00346	0.00445	0.00382	0.00305	0.00323	0.00364	0.00361
202.08	0.00391	0.00469	0.00448	0.00419	0.00392	0.00368	0.00427	0.00392	0.00304	0.00289	0.00352	0.00376
202.32	0.00375	0.00477	0.00475	0.00401	0.00394	0.00314	0.00458	0.00373	0.00327	0.00315	0.00373	0.00317
202.56	0.00407	0.00464	0.00492	0.00398	0.00393	0.00356	0.00447	0.00387	0.00285	0.00305	0.0034	0.00348
202.8	0.004	0.00464	0.00441	0.00428	0.00395	0.00374	0.00434	0.00381	0.00309	0.00333	0.00384	0.00373
203.04	0.00399	0.00478	0.00491	0.00385	0.00398	0.00327	0.00437	0.00368	0.00335	0.00319	0.00338	0.0032
203.28	0.00375	0.0046	0.00476	0.00367	0.00381	0.0034	0.00422	0.00394	0.003	0.00314	0.00351	0.00314
203.52	0.00402	0.00469	0.00514	0.00412	0.00358	0.00343	0.00461	0.00398	0.00304	0.00307	0.00374	0.00372
203.76	0.0041	0.0046	0.00506	0.00387	0.00371	0.00373	0.00448	0.00381	0.00302	0.00311	0.00345	0.00339
204	0.00396	0.00458	0.00493	0.00398	0.00376	0.00349	0.00422	0.00355	0.00312	0.00333	0.00329	0.00348
204.24	0.00404	0.00445	0.0053	0.00396	0.0042	0.00365	0.00434	0.00371	0.00325	0.00309	0.00329	0.00344
204.48	0.00389	0.00459	0.00492	0.00393	0.00363	0.00325	0.00437	0.00361	0.00304	0.00307	0.0036	0.00336
204.72	0.00389	0.00469	0.00501	0.00413	0.00417	0.00337	0.00472	0.00368	0.00309	0.00326	0.00374	0.00352
204.96	0.00397	0.00458	0.00498	0.00373	0.00413	0.00327	0.00441	0.00385	0.00288	0.00348	0.00351	0.00314
205.2	0.0041	0.00484	0.00514	0.00412	0.00384	0.00337	0.00417	0.00382	0.00306	0.00315	0.00326	0.00329
205.44	0.0037	0.00459	0.0051	0.00375	0.00378	0.0029	0.00464	0.00378	0.00311	0.003	0.0035	0.00351
205.68	0.00388	0.0047	0.00494	0.00405	0.00374	0.0036	0.00463	0.00358	0.00319	0.00319	0.00334	0.00356
205.92	0.00378	0.00487	0.005	0.00414	0.00363	0.00324	0.00429	0.00371	0.00308	0.00321	0.0036	0.00365
206.16	0.00389	0.00481	0.00519	0.00392	0.00397	0.00329	0.0043	0.00402	0.00296	0.00322	0.00334	0.0033
206.4	0.00401	0.00461	0.00467	0.00392	0.00406	0.00346	0.00437	0.00375	0.00312	0.00292	0.00364	0.0037
206.64	0.0041	0.00454	0.00502	0.00393	0.00424	0.00352	0.00427	0.00385	0.00306	0.00309	0.00345	0.00309
206.88	0.00385	0.00466	0.00484	0.00404	0.00392	0.0032	0.0047	0.00402	0.00331	0.0031	0.00337	0.0031
207.12	0.00433	0.00433	0.0048	0.00368	0.00372	0.00323	0.00468	0.00383	0.00279	0.00286	0.0035	0.00314
207.36	0.00391	0.00464	0.00502	0.00431	0.00394	0.00332	0.00435	0.00369	0.00293	0.00334	0.0035	0.00335
207.6	0.00401	0.00457	0.00493	0.00393	0.00407	0.00347	0.0046	0.00368	0.00264	0.00323	0.00338	0.00318
207.84	0.00385	0.00451	0.00484	0.0038	0.0036	0.00334	0.00436	0.00366	0.00315	0.00315	0.00336	0.00344
208.08	0.00383	0.00449	0.00496	0.00395	0.00401	0.00354	0.00435	0.00371	0.00294	0.00317	0.00361	0.0032
208.32	0.00394	0.00405	0.00514	0.00417	0.00386	0.00347	0.00451	0.00385	0.00278	0.00308	0.00366	0.00345
208.56	0.004	0.00452	0.00532	0.00414	0.00362	0.00328	0.00458	0.00364	0.0031	0.00285	0.00372	0.00318
208.8	0.00427	0.00465	0.00498	0.00415	0.00387	0.00351	0.00436	0.00343	0.00286	0.00304	0.00338	0.00333
209.04	0.0042	0.00455	0.00463	0.00406	0.00389	0.00326	0.00438	0.00351	0.00323	0.00329	0.00365	0.00343
209.28	0.00402	0.00453	0.00511	0.00395	0.0039	0.00377	0.00464	0.00368	0.003	0.00339	0.00343	0.00362
209.52	0.00405	0.00459	0.00489	0.00371	0.00388	0.00339	0.00451	0.00389	0.00308	0.00355	0.00317	0.00276
209.76	0.00382	0.00477	0.00507	0.00438	0.00392	0.00356	0.0046	0.00358	0.00275	0.00302	0.00349	0.00337
210	0.00361	0.00462	0.00504	0.00394	0.00386	0.00347	0.00448	0.00378	0.00295	0.00308	0.0033	0.00315
210.24	0.00373	0.00469	0.0046	0.00416	0.00375	0.00315	0.0044	0.0036	0.00279	0.00331	0.00321	0.00304
210.48	0.0039	0.00447	0.0049	0.00383	0.00413	0.00332	0.00455	0.00387	0.00322	0.00291	0.00343	0.00341
210.72	0.00374	0.00477	0.00465	0.00408	0.0038	0.00319	0.00457	0.00358	0.00306	0.00334	0.00324	0.00351
210.96	0.00402	0.00477	0.005	0.00407	0.00415	0.0035	0.00437	0.0034	0.00304	0.00281	0.00359	0.00357
211.2	0.00383	0.00457	0.00485	0.00404	0.0041	0.00326	0.00433	0.00353	0.0028	0.0032	0.00359	0.00352
211.44	0.00398	0.00443	0.00484	0.00402	0.00426	0.00306	0.00454	0.00372	0.00287	0.00339	0.00334	0.00328
211.68	0.0041	0.00439	0.00494	0.00447	0.00397	0.00329	0.0045	0.00373	0.00303	0.0035	0.00333	0.003
211.92	0.00406	0.00422	0.00485	0.00413	0.004	0.00358	0.00432	0.00355	0.00289	0.00277	0.00338	0.00348
212.16	0.00379	0.00441	0.00508	0.00422	0.00373	0.00335	0.00453	0.00354	0.00312	0.00309	0.003	0.00325
212.4	0.00392	0.00463	0.00451	0.0037	0.00388	0.00324	0.0044	0.00364	0.00291	0.00297	0.00358	0.00346
212.64	0.00397	0.00435	0.00467	0.00404	0.00408	0.00332	0.0045	0.00369	0.00328	0.0033	0.00296	0.00335
212.88	0.00396	0.00483	0.00488	0.00372	0.00413	0.0032	0.00437	0.00349	0.00289	0.00317	0.00337	0.00327
213.12	0.00379	0.00442	0.00513	0.00402	0.00403	0.00332	0.00433	0.00373	0.00304	0.00315	0.00312	0.00317
213.36	0.00377	0.00438	0.00477	0.00386	0.00394	0.00331	0.00435	0.00382	0.00253	0.0032	0.00323	0.00322
213.6	0.00376	0.00444	0.00479	0.00385	0.00396	0.00349	0.00439	0.00385	0.00278	0.00285	0.00308	0.0035
213.84	0.00395	0.00458	0.00467	0.00379	0.00397	0.00349	0.00442	0.00371	0.00256	0.00287	0.00315	0.00333
214.08	0.00383	0.00442	0.00499	0.0039	0.00377	0.00338	0.00432	0.00362	0.00255	0.00334	0.0036	0.00329
214.32	0.00384	0.00484	0.0049	0.00366	0.00376	0.00338	0.00427	0.0038	0.00309	0.00311	0.00356	0.00323
214.56	0.00379	0.00448	0.00475	0.00379	0.00368	0.00344	0.00458	0.00352	0.00288	0.00333	0.00325	0.00347
214.8	0.00369	0.00469	0.00473	0.00412	0.00405	0.00326	0.00453	0.00369	0.00286	0.00323	0.00367	0.00335
215.04	0.00379	0.00456	0.00494	0.00345	0.00407	0.00347	0.00437	0.0038	0.00301	0.00291	0.00323	0.00347
215.28	0.00365	0.00438	0.00479	0.00405	0.00369	0.00355	0.00424	0.00376	0.00306	0.00297	0.00315	0.00303
215.52	0.00413	0.00468	0.00458	0.00395	0.00381	0.00349	0.00439	0.00387	0.0031	0.00249	0.00314	0.00348
215.76	0.00379	0.00451	0.00506	0.00395	0.00409	0.00321	0.00466	0.00356	0.00284	0.00305	0.00354	0.003
216	0.00403	0.0046	0.00465	0.00393	0.00388	0.0033	0.00434	0.00338	0.00302	0.00302	0.00285	0.00325
216.24	0.00381	0.00459	0.00456	0.00383	0.00399	0.00333	0.00416	0.00353	0.00291	0.0034	0.00318	0.00324
216.48	0.00386	0.00483	0.0051	0.00374	0.00385	0.00318	0.00428	0.00381	0.00283	0.00303	0.00339	0.0033
216.72	0.00409	0.00454	0.00489	0.00407	0.00389	0.00327	0.00481	0.00388	0.00303	0.00297	0.00327	0.00292
216.96	0.00367	0.00446	0.00516	0.00408	0.00402	0.00331	0.00433	0.00358	0.00262	0.00279	0.00328	0.00321
217.2	0.00373	0.00463	0.00464	0.00426	0.00387	0.00368	0.00444	0.00378	0.00308	0.00302	0.00333	0.0034
217.44	0.00375	0.0047	0.00481	0.00375	0.00365	0.00346	0.00428	0.00349	0.00281	0.00267	0.00321	0.00339
217.68	0.00388	0.00464	0.005	0.00385	0.00422	0.00356	0.00418	0.00365	0.00286	0.00309	0.00329	0.00302
217.92	0.00379	0.00459	0.00453	0.0037	0.00384	0.00345	0.00448	0.00345	0.00257	0.00298	0.00335	0.00313
218.16	0.00394	0.0044	0.00504	0.00374	0.00373	0.00326	0.00422	0.00356	0.00272	0.00277	0.00332	0.00302
218.4	0.00365	0.00452	0.0045	0.00388	0.00394	0.00344	0.00417	0.00351	0.00308	0.00326	0.00335	0.00335
218.64	0.00382	0.0045	0.00443	0.00357	0.00401	0.00324	0.00451	0.00384	0.00288	0.00284	0.00354	0.00312
218.88	0.00401	0.0046	0.00493	0.0039	0.00406	0.00327	0.00442	0.00345	0.00286	0.003	0.00309	0.00324
219.12	0.00368	0.00439	0.00474	0.00379	0.00382	0.00336	0.00453	0.0039	0.00294	0.00327	0.00343	0.00314
219.36	0.0037	0.00443	0.00457	0.00414	0.0037	0.00325	0.00447	0.00357	0.00287	0.00282	0.00285	0.00322
219.6	0.00369	0.00437	0.00462	0.00403	0.00397	0.00302	0.00442	0.00361	0.00272	0.00336	0.00352	0.00338
219.84	0.00398	0.00459	0.0047	0.00371	0.00373	0.00326	0.00465	0.00378	0.00293	0.00315	0.00343	0.00343
220.08	0.00403	0.00485	0.00503	0.00416	0.00372	0.00343	0.00448	0.00369	0.00286	0.00262	0.0034	0.00345
220.32	0.0037	0.00429	0.00503	0.00364	0.00408	0.00289	0.00424	0.00361	0.00262	0.00319	0.00345	0.00323
220.56	0.00381	0.00452	0.00469	0.00433	0.0039	0.00317	0.00451	0.00378	0.00258	0.00307	0.00321	0.00338
220.8	0.00378	0.00422	0.00485	0.00406	0.00404	0.00329	0.00401	0.00368	0.00296	0.00294	0.00325	0.00336
221.04	0.00376	0.00444	0.0048	0.00378	0.00403	0.00324	0.00428	0.00379	0.00317	0.00303	0.00346	0.0034
221.28	0.00417	0.0046	0.00472	0.00371	0.00375	0.00329	0.00418	0.00353	0.00291	0.0029	0.00318	0.00329
221.52	0.00385	0.00468	0.00491	0.00378	0.00354	0.00291	0.00447	0.00371	0.00279	0.00294	0.00338	0.0032
221.76	0.00368	0.00455	0.00456	0.00357	0.00361	0.00316	0.00428	0.00355	0.00272	0.00296	0.00349	0.00316
222	0.0037	0.00423	0.00484	0.00362	0.00371	0.00349	0.00448	0.00354	0.00291	0.00288	0.00315	0.00327
222.24	0.00349	0.00443	0.00472	0.00352	0.00418	0.00329	0.0042	0.00362	0.00279	0.00293	0.0035	0.00322
222.48	0.00393	0.00474	0.00454	0.00369	0.00371	0.00351	0.00444	0.00356	0.00271	0.00265	0.00345	0.00314
222.72	0.00385	0.00496	0.0049	0.00367	0.00374	0.00334	0.0044	0.00349	0.00285	0.0031	0.00317	0.00324
222.96	0.00384	0.00441	0.00457	0.00376	0.00373	0.00317	0.00439	0.0036	0.00282	0.00298	0.00306	0.00332
223.2	0.00389	0.00424	0.00493	0.00361	0.00369	0.00291	0.00441	0.00362	0.0027	0.00346	0.00328	0.00313
223.44	0.00388	0.00461	0.00449	0.00387	0.00404	0.00309	0.0044	0.00374	0.00299	0.00286	0.00325	0.00301
223.68	0.00357	0.00441	0.00478	0.00377	0.00378	0.00345	0.00419	0.00357	0.0027	0.00289	0.00334	0.00339
223.92	0.00408	0.00473	0.00465	0.00386	0.00374	0.00337	0.00433	0.00385	0.00325	0.00314	0.0029	0.00322
224.16	0.00391	0.00438	0.00472	0.00362	0.00381	0.00313	0.00448	0.00372	0.00257	0.00299	0.00306	0.00338
224.4	0.00371	0.00442	0.00492	0.00382	0.00361	0.00294	0.00435	0.00348	0.00275	0.00299	0.00311	0.00328
224.64	0.0036	0.00424	0.00489	0.00393	0.00354	0.003	0.00421	0.00388	0.00279	0.00297	0.00333	0.00302
224.88	0.00384	0.00438	0.00453	0.00389	0.00391	0.00328	0.00445	0.00352	0.00264	0.00285	0.00335	0.00329
225.12	0.00399	0.00437	0.00455	0.00378	0.00383	0.0032	0.0045	0.00345	0.00265	0.00306	0.00367	0.0029
225.36	0.00408	0.00442	0.00476	0.00363	0.00396	0.00329	0.00419	0.00378	0.00261	0.00286	0.00351	0.0034
225.6	0.00377	0.00435	0.00439	0.00391	0.00389	0.00334	0.00425	0.00355	0.00307	0.00278	0.00297	0.00315
225.84	0.00363	0.00464	0.00456	0.00386	0.00397	0.00318	0.00422	0.00349	0.00262	0.00302	0.00318	0.00322
226.08	0.00379	0.00428	0.00505	0.00412	0.00373	0.00305	0.0044	0.00377	0.00304	0.00313	0.00338	0.00314
226.32	0.00383	0.00425	0.00445	0.00367	0.00389	0.00337	0.00428	0.00375	0.00276	0.00309	0.00341	0.00272
226.56	0.00415	0.00463	0.00493	0.00354	0.00379	0.0031	0.00426	0.00342	0.00266	0.00282	0.00301	0.00374
226.8	0.00379	0.00462	0.00504	0.0038	0.00387	0.00335	0.00456	0.00373	0.00263	0.00327	0.00317	0.00318
227.04	0.00396	0.00479	0.00474	0.0036	0.00365	0.00314	0.0039	0.0037	0.00265	0.00297	0.00328	0.00318
227.28	0.00359	0.00437	0.00483	0.00362	0.00351	0.0034	0.00431	0.00356	0.00285	0.00299	0.00321	0.00268
227.52	0.00374	0.0042	0.00475	0.00378	0.00364	0.00311	0.00453	0.00377	0.00252	0.00294	0.00284	0.00302
227.76	0.00413	0.00432	0.00475	0.00419	0.00363	0.00301	0.00438	0.00352	0.0027	0.00287	0.00297	0.00311
228	0.00396	0.00474	0.00479	0.00414	0.00372	0.00316	0.00458	0.0032	0.00286	0.00269	0.0028	0.00314
228.24	0.00387	0.00459	0.00473	0.00373	0.00413	0.00333	0.00421	0.00352	0.0029	0.00346	0.00323	0.00341
228.48	0.0037	0.00431	0.00495	0.00376	0.00379	0.0032	0.00434	0.00388	0.00246	0.00293	0.00305	0.00291
228.72	0.00418	0.00442	0.00465	0.00384	0.00393	0.00338	0.00438	0.00368	0.0027	0.00286	0.00318	0.0034
228.96	0.00371	0.00449	0.00479	0.00352	0.00375	0.00325	0.00419	0.00353	0.00294	0.00297	0.0034	0.00325
229.2	0.00372	0.0045	0.0049	0.00368	0.00374	0.00307	0.00414	0.00342	0.00286	0.00259	0.00298	0.00329
229.44	0.0039	0.00436	0.00517	0.00365	0.00408	0.00321	0.00451	0.00351	0.0029	0.00303	0.00279	0.00313
229.68	0.00381	0.00427	0.00455	0.00375	0.00356	0.00311	0.0044	0.00347	0.00298	0.00307	0.00345	0.00279
229.92	0.00372	0.00456	0.00465	0.00395	0.0037	0.00313	0.00432	0.00388	0.00282	0.00337	0.00301	0.00317
230.16	0.0039	0.00395	0.005	0.00385	0.00374	0.00321	0.0041	0.00327	0.00271	0.0029	0.00323	0.00298
230.4	0.00376	0.00406	0.00494	0.00355	0.00389	0.00344	0.00403	0.0034	0.00273	0.00263	0.00273	0.00318
230.64	0.00368	0.00454	0.00457	0.00364	0.00388	0.00339	0.00443	0.00365	0.00241	0.00312	0.00309	0.00329
230.88	0.00339	0.00481	0.0049	0.00376	0.00358	0.00317	0.00448	0.00364	0.0025	0.00332	0.00325	0.00317
231.12	0.00378	0.0045	0.00454	0.00375	0.00383	0.0034	0.00407	0.00343	0.00276	0.0028	0.00312	0.00343
231.36	0.00405	0.00445	0.00494	0.0038	0.00354	0.00314	0.00393	0.00349	0.00305	0.00286	0.00332	0.00302
231.6	0.00381	0.00426	0.00471	0.00386	0.0038	0.00318	0.00426	0.00344	0.00275	0.00267	0.00315	0.00341
231.84	0.0036	0.0042	0.00488	0.00371	0.00367	0.00304	0.00416	0.00327	0.00274	0.00271	0.00305	0.00319
232.08	0.00376	0.0045	0.00473	0.00355	0.00344	0.00331	0.00413	0.00338	0.00263	0.00322	0.00267	0.00307
232.32	0.00395	0.00459	0.00466	0.00369	0.00393	0.00304	0.00411	0.00366	0.00256	0.0026	0.00351	0.0032
232.56	0.00379	0.00436	0.00495	0.00358	0.00381	0.00307	0.0039	0.00379	0.00267	0.00287	0.0034	0.00317
232.8	0.00355	0.00452	0.00439	0.00379	0.00366	0.00319	0.00431	0.00344	0.0029	0.00288	0.00306	0.00313
233.04	0.00384	0.00474	0.00474	0.00379	0.00377	0.00332	0.00416	0.00338	0.00302	0.00315	0.00293	0.00323
233.28	0.00367	0.00439	0.00452	0.00368	0.00419	0.00304	0.00401	0.00353	0.00252	0.00265	0.00336	0.00297
233.52	0.0036	0.00461	0.00494	0.00408	0.00369	0.00338	0.00419	0.00349	0.00242	0.00296	0.00301	0.0034
233.76	0.00395	0.00433	0.00477	0.0037	0.00332	0.00329	0.00447	0.00335	0.00275	0.00275	0.00315	0.00297
234	0.00335	0.00439	0.00462	0.00369	0.00383	0.00302	0.00473	0.0033	0.00278	0.00329	0.00303	0.00298
234.24	0.00363	0.00432	0.00481	0.00384	0.00393	0.00329	0.00429	0.00347	0.0028	0.00307	0.00313	0.00307
234.48	0.00372	0.0043	0.00453	0.00353	0.00332	0.00329	0.00431	0.0037	0.00245	0.00279	0.00326	0.00326
234.72	0.00379	0.0045	0.00506	0.00339	0.00372	0.00316	0.00415	0.00331	0.00267	0.00276	0.00288	0.00309
234.96	0.00385	0.00447	0.00435	0.00353	0.00373	0.0031	0.00395	0.00364	0.00254	0.0029	0.0029	0.003
235.2	0.00373	0.00469	0.00474	0.00391	0.00345	0.00329	0.00441	0.0039	0.00283	0.00265	0.00316	0.00322
235.44	0.00369	0.00457	0.0046	0.00381	0.00369	0.00347	0.00447	0.00355	0.00248	0.00301	0.00288	0.00311
235.68	0.00386	0.00436	0.00482	0.00371	0.0037	0.00314	0.00429	0.00371	0.00274	0.00296	0.00311	0.00293
235.92	0.0036	0.0042	0.00439	0.00342	0.00396	0.0031	0.00388	0.00358	0.00242	0.00295	0.00316	0.00287
236.16	0.00348	0.00434	0.0045	0.00355	0.00364	0.00295	0.00461	0.00344	0.00267	0.00286	0.00316	0.00328
236.4	0.0036	0.00426	0.00447	0.00371	0.004	0.00304	0.00427	0.00343	0.00253	0.00303	0.00298	0.00298
236.64	0.00369	0.00463	0.005	0.0037	0.00352	0.00306	0.00399	0.00365	0.0024	0.00284	0.00288	0.00295
236.88	0.00347	0.00414	0.00498	0.00388	0.00383	0.0029	0.00435	0.00348	0.00247	0.00312	0.00278	0.00328
237.12	0.00383	0.00419	0.00489	0.00349	0.00354	0.00292	0.00394	0.00342	0.00271	0.00312	0.00312	0.00326
237.36	0.00372	0.0046	0.00463	0.00362	0.00353	0.00334	0.00421	0.00363	0.00282	0.00271	0.00305	0.00296
237.6	0.00346	0.00468	0.00407	0.0034	0.00352	0.00303	0.00413	0.00315	0.00287	0.00274	0.00302	0.00357
237.84	0.00384	0.00435	0.00455	0.00374	0.00361	0.00355	0.00445	0.00356	0.00296	0.00298	0.00311	0.003
238.08	0.00381	0.00444	0.00475	0.00374	0.00389	0.00279	0.004	0.00345	0.00247	0.00315	0.00308	0.00275
238.32	0.00368	0.00449	0.00473	0.0038	0.00368	0.00284	0.00383	0.0035	0.00267	0.00273	0.00278	0.00298
238.56	0.00352	0.0044	0.00445	0.00386	0.00366	0.00284	0.00408	0.00378	0.00256	0.00323	0.00301	0.00296
238.8	0.00377	0.00435	0.00478	0.00366	0.00333	0.00315	0.00427	0.00363	0.00253	0.00287	0.00305	0.00325
239.04	0.00405	0.00416	0.00452	0.00343	0.00351	0.00305	0.00433	0.00359	0.00262	0.00303	0.00309	0.00294
239.28	0.00364	0.00416	0.00498	0.0039	0.00364	0.00306	0.00437	0.00343	0.00283	0.00309	0.00273	0.00326
239.52	0.00385	0.00429	0.0047	0.00365	0.00375	0.00324	0.00409	0.00359	0.00289	0.00286	0.00274	0.00304
239.76	0.00334	0.00444	0.0046	0.00343	0.00339	0.0032	0.00424	0.00366	0.00263	0.003	0.00319	0.00341
