# Supplementary material for: Complementary biosensors reveal different G-protein signaling modes triggered by GPCRs and non-receptor activators
Source: eLife. 2021 Mar 31;10:e65620. doi: 10.7554/eLife.65620 (PMC8034979; doi:10.7554/eLife.65620)
Supplement: Figure 6—figure supplement 1—source data 1. [file elife-65620-fig6-figsupp1-data1.xlsx]

## Sheet: Time traces
	Control				Carbachol pretreatment
Time	Exp1	Exp2	Exp3	Exp4	Exp1	Exp2	Exp3	Exp4
0	-3e-05	-5e-05	6e-05	5e-05	0.000391	0.0003	-2.576e-05	0.00043
0.24	-5e-05	-0.00039	0	9e-05	0.000371	0.00035	0.00043424	0.00025
0.48	5e-05	-0.00022	0.00015	5e-05	0.000471	0.00021	0.00022424	0.0001
0.72	0.00015	0.00019	-0.00016	0.00013	0.000321	0.00025	0.00034424	-9.9e-06
0.96	-4e-05	0.00024	0.0001	8e-05	0.000281	0.00064	-5.76e-06	0.00042
1.2	0.00019	-9e-05	-1e-05	-0.00017	0.000411	2.01e-05	0.00025424	0.00043
1.44	-0.00024	0.00017	-5e-05	0.00012	0.000191	0.00027	3.424e-05	0.00013
1.68	0	5e-05	0.00012	-8e-05	0.000171	0.00048	2.424e-05	0.00045
1.92	0.00035	0.00026	0.00016	0.00041	0.000431	0.00013	0.00026424	-0.00017
2.16	0	-0.00011	-0.00023	6e-05	0.000391	0.00063	0.00022424	0.0001
2.4	-6e-05	5e-05	0.00042	-9e-05	4.06e-05	0.00021	1.424e-05	0.00032
2.64	-0.00016	0.0001	3e-05	0.00011	0.000331	9.01e-05	0.00011424	0.00024
2.88	-0.00033	-0.00022	-0.00012	-1e-05	0.000221	0.00022	0.00037424	0.00011
3.12	-4e-05	3e-05	0.00031	0.00022	0.000151	0.00044	3.424e-05	0.00042
3.36	-5e-05	0.00011	-1e-05	1e-05	0.000251	0.00022	6.424e-05	0.00011
3.6	0.00014	-0.0001	0.00027	1e-05	0.000211	-0.00014	0.00044424	0.00023
3.84	0.00019	-8e-05	-4e-05	0.00022	0.000281	4.01e-05	0.00012424	0.00041
4.08	-2e-05	-4e-05	-4e-05	0	0.000451	3.01e-05	0.00025424	0.00042
4.32	0.00011	0.00012	-8e-05	0.0001	7.06e-05	0.00016	0.00017424	0.00018
4.56	0.0001	-0.00017	-2e-05	3e-05	-5.9e-05	0.00022	6.424e-05	0.00027
4.8	-0.00014	0.00018	0.00012	0.00019	0.000301	0.00047	0.00011424	0.00029
5.04	-0.0001	6e-05	-0.00031	-4e-05	5.06e-05	0.00043	0.00037424	0.00036
5.28	0.00011	0.00013	-6e-05	-1e-05	0.000101	0.00036	8.424e-05	0.00019
5.52	0.00019	6e-05	9e-05	-0.00013	0.000131	0.00038	-0.0001358	4.01e-05
5.76	-0.00018	8e-05	-6e-05	3e-05	7.06e-05	0.00026	0.00018424	-0.00017
6	0.00031	-6e-05	-5e-05	0.00012	0.000191	0.00018	0.00015424	0.00025
6.24	8e-05	-3e-05	-2e-05	0.00014	0.000321	0.00033	8.424e-05	0.00034
6.48	0.00029	0.0002	-0.00013	-1e-05	0.000301	0.00019	-5.76e-06	-4e-05
6.72	-4e-05	-6e-05	2e-05	-8e-05	2.06e-05	8e-08	0.00051424	0.00019
6.96	0.00024	1e-05	3e-05	9e-05	0.000411	-5e-05	0.00031424	0.00031
7.2	-0.00022	0.00014	4e-05	0.00012	0.000151	-0.00014	1.424e-05	1.01e-05
7.44	9e-05	-0.00013	0.00014	-0.00016	0.000121	0.00028	0.00013424	0.00012
7.68	1e-05	0.00024	1e-05	0.00014	0.000251	0.00018	8.424e-05	0.00013
7.92	9e-05	-0.00012	0	-3e-05	-1.9e-05	0.00026	0.00015424	0.00021
8.16	-0.00011	-0.00014	1e-05	-0.00014	-3.9e-05	3.01e-05	8.424e-05	5.01e-05
8.4	-0.00013	-0.00012	0	0.00024	0.000281	0.00036	0.00020424	0.00036
8.64	0.00022	-0.00011	0.00013	8e-05	0.000231	0.00038	0.00017424	0.00017
8.88	-0.00015	-0.0001	0	0.00023	0.000381	0.00018	9.424e-05	0.00024
9.12	0.0002	3e-05	0.00026	-6e-05	0.000181	-5e-05	4.424e-05	0.00024
9.36	0.00017	5e-05	0.00022	-0.00014	8.06e-05	0.0002	-8.576e-05	4.01e-05
9.6	0.00035	-8e-05	4e-05	0.00014	0.000281	0.0004	0.00011424	0.00013
9.84	-1e-05	0.00015	7e-05	-0.00017	-4.9e-05	0.00012	0.00021424	0.00012
10.08	-0.00022	0.00016	0	-0.00016	2.06e-05	-0.00012	0.00018424	-8e-05
10.32	5e-05	0.00011	0.00011	-0.00023	7.06e-05	0.00014	4.24e-06	3.01e-05
10.56	-0.00019	0.00013	-0.00023	0.0003	0.000181	-0.00018	0.00012424	8.01e-05
10.8	-0.00045	6e-05	7e-05	9e-05	0.000371	0.00013	3.424e-05	0.00021
11.04	0	5e-05	1e-05	8e-05	-0.00014	0.00049	-5.76e-06	0.00022
11.28	0.00018	5e-05	-0.00012	-0.00013	-0.00014	0.00011	0.00011424	0.00017
11.52	6e-05	0.00031	-0.00017	-9e-05	2.06e-05	0.00026	0.00012424	0.00025
11.76	-0.0001	-1e-05	4e-05	0.00017	-7.9e-05	-6e-05	0.00011424	4.01e-05
12	-2e-05	-0.00016	-0.00031	-6e-05	-0.00012	0.00031	-6.576e-05	6.01e-05
12.24	-9e-05	8e-05	0.00024	-0.00015	-2.9e-05	-5e-05	-3.576e-05	1.01e-05
12.48	-6e-05	0.00029	-0.00034	-0.00029	0.000441	0.00012	0.00013424	0.00036
12.72	-0.0001	0.00016	0.00019	0.00021	-0.00025	0.00024	0.00020424	0.0001
12.96	-9e-05	-0.00021	8e-05	0.00011	-2.9e-05	9.01e-05	-0.0001358	1.01e-05
13.2	-6e-05	0.00012	0.00022	-0.00011	0.000301	6.01e-05	0.00010424	0.00026
13.44	-3e-05	0.00011	8e-05	5e-05	0.000161	0.00012	6.424e-05	7.01e-05
13.68	-8e-05	-1e-05	-0.0001	-0.00018	-5.9e-05	-0.00011	-7.576e-05	-0.00018
13.92	-0.0001	5e-05	-6e-05	0	0.000371	0.00016	8.424e-05	5.01e-05
14.16	0	-0.0001	4e-05	-1e-05	6.06e-05	0.00019	-5.576e-05	-0.00011
14.4	-0.00043	7e-05	0.00013	-8e-05	3.06e-05	-4e-05	0.00022424	-4e-05
14.64	-0.00011	0.00013	-4e-05	-0.00018	0.000251	-0.00012	0.00012424	-0.00013
14.88	-9e-05	0.00022	4e-05	-0.00014	-0.00013	0.00036	0.00020424	-2e-05
15.12	0.00015	-0.00018	0.00011	-0.00011	0.000211	-0.00023	0.00014424	-0.0002
15.36	0.0001	-0.00021	-5e-05	-7e-05	-5.9e-05	-0.00015	1.424e-05	-0.00031
15.6	3e-05	-1e-05	-1e-05	2e-05	8.06e-05	0.00023	-0.0001158	-7e-05
15.84	0.0002	1e-05	1e-05	7e-05	-6.9e-05	-0.0001	-0.0001258	-3e-05
16.08	-0.00017	5e-05	6e-05	-0.00014	-0.00023	-9.9e-06	0.00014424	8.01e-05
16.32	0.0002	-0.00031	-0.00012	0.00015	4.06e-05	-8e-05	-0.0001558	-0.00015
16.56	-0.00021	-6e-05	-1e-05	8e-05	-0.00027	5.01e-05	-0.0001358	-3e-05
16.8	-0.0001	6e-05	-1e-05	-0.00019	-0.00039	-0.00022	3.424e-05	-2e-05
17.04	-7e-05	0.00014	6e-05	0.00027	-0.0002	5.01e-05	3.424e-05	-0.00015
17.28	-0.00014	2e-05	0.00024	1e-05	0.000261	9.01e-05	0.00016424	0.00028
17.52	0.00025	-0.0001	2e-05	0	-9.4e-06	3.01e-05	-4.576e-05	1.01e-05
17.76	-0.00022	0.00015	-0.00019	-0.00013	-0.00014	-6e-05	7.424e-05	5.01e-05
18	0.00031	4e-05	0.00012	-0.00034	9.06e-05	-0.00012	-1.576e-05	-0.00018
18.24	-2e-05	0.0001	-4e-05	3e-05	-0.00021	-0.00018	0.00024424	1.01e-05
18.48	0.0001	-6e-05	-8e-05	-6e-05	-0.00017	-3e-05	3.424e-05	0.00039
18.72	7e-05	0.00018	-0.00011	0.00015	-9.9e-05	-0.00029	-1.576e-05	-0.00031
18.96	-0.00013	-0.00038	8e-05	1e-05	-0.00022	0.00021	-5.576e-05	-9e-05
19.2	-0.00019	-0.00013	-3e-05	0	-7.9e-05	3.01e-05	-1.576e-05	-0.00017
19.44	0.00025	-9e-05	-8e-05	0.00013	9.06e-05	-0.00019	2.424e-05	-0.00034
19.68	-0.00015	-0.0001	-4e-05	-0.00024	-1.9e-05	-0.00029	-0.0001058	-3e-05
19.92	-0.00023	0.0003	0.00016	-0.00023	-0.0003	-0.00029	2.424e-05	8.01e-05
20.16	-0.00022	-0.00016	-0.00014	-7e-05	6.06e-05	-5e-05	-0.0002558	-0.00032
20.4	0.00014	-0.00028	7e-05	-3e-05	2.06e-05	0.0002	-0.0004458	8.01e-05
20.64	0.00012	-2e-05	1e-05	0.00036	-0.0002	-0.00016	-5.76e-06	-0.00038
20.88	-3e-05	-3e-05	-0.00011	0.00027	7.06e-05	-0.00032	-7.576e-05	5.01e-05
21.12	0.00023	-0.00023	-0.00012	-0.00011	5.06e-05	-0.00033	-0.0001858	-0.00035
21.36	-6e-05	9e-05	9e-05	2e-05	-2.9e-05	-0.00019	-7.576e-05	3.01e-05
21.6	-0.00015	0.00015	-0.0001	8e-05	-0.00037	-0.00029	4.424e-05	6.01e-05
21.84	-0.00019	9e-05	-5e-05	8e-05	0.000181	-0.00045	-0.0001458	0.00012
22.08	0.00019	0	-0.00012	-0.0001	-2.9e-05	-0.00043	-0.0003158	0.00011
22.32	-0.0001	-0.00018	-6e-05	-0.0001	-0.0004	-9.9e-06	-8.576e-05	-0.00039
22.56	8e-05	-6e-05	0.0001	7e-05	-0.00045	-0.0001	-0.0002958	-0.00041
22.8	0.00019	-2e-05	-0.00019	8e-05	-0.00031	-0.00029	-4.576e-05	-0.00011
23.04	-0.00011	0.0001	0.00013	1e-05	-7.9e-05	-0.00028	-0.0003458	-5e-05
23.28	-7e-05	3e-05	0.00015	9e-05	-0.00012	-5e-05	-0.0001358	0.00015
23.52	3e-05	-0.00013	1e-05	-0.00022	-0.00033	-0.00011	-0.0002858	-0.00061
23.76	-3e-05	-1e-05	-0.00025	-0.00026	-0.00032	-0.00049	-0.0002058	-0.00023
24	0.0001	-9e-05	0.00011	-0.0001	-0.00036	-0.00049	-0.0002658	-0.00024
24.24	-0.00016	4e-05	0.00014	-6e-05	2.06e-05	-0.0001	-7.576e-05	-0.00043
24.48	0.00022	-0.0003	7e-05	-0.00013	-2.9e-05	-0.00012	-0.0001458	-0.00023
24.72	-2e-05	-0.00016	-5e-05	-0.00018	3.06e-05	-9e-05	-0.0003058	-0.00032
24.96	0.00012	-2e-05	0.00012	-0.00018	-0.0002	-7e-05	-5.76e-06	3.01e-05
25.2	-9e-05	3e-05	-0.00024	-2e-05	-0.00012	-0.00015	-0.0003558	0.00021
25.44	-0.00014	4e-05	-0.00023	0.00013	-0.00015	-0.00032	-0.0002058	-0.00038
25.68	0.00011	0	-0.0001	8e-05	-0.00013	-0.00042	-6.576e-05	-0.00031
25.92	3e-05	-0.0001	0	-0.00019	-0.00032	1.01e-05	-0.0001558	-0.00027
26.16	-0.00016	9e-05	-0.00011	-3e-05	-0.00044	-0.00037	2.424e-05	-0.00012
26.4	-1e-05	-0.00013	7e-05	9e-05	-0.00017	-0.00021	-9.576e-05	-0.0003
26.64	-0.00032	1e-05	-1e-05	7e-05	-0.00028	-0.00035	-0.0002758	-0.00031
26.88	0.00015	-0.00011	-0.00024	0.00012	-0.00037	-0.00048	-0.0002958	-0.00035
27.12	6e-05	-0.00038	0	1e-05	-0.00014	-0.0005	-0.0003958	-0.00022
27.36	0.00015	0.00031	0.0001	0.00013	-0.0004	-4e-05	-0.0001858	-0.0005
27.6	0.00018	0.00012	-3e-05	-0.00025	-0.00016	-0.00016	-2.576e-05	-0.00015
27.84	3e-05	0.00016	-7e-05	-5e-05	-0.00016	-0.00031	-1.576e-05	-0.00048
28.08	7e-05	-0.00023	-4e-05	-9e-05	-0.00023	-0.00035	-0.0003058	3.01e-05
28.32	-7e-05	1e-05	7e-05	-0.00016	-0.00045	-0.0002	-0.0003058	-0.00054
28.56	4e-05	-3e-05	-9e-05	6e-05	-0.00019	-9.9e-06	-0.0001458	-0.00011
28.8	4e-05	0.0001	-0.00026	5e-05	-0.0004	-0.00051	-0.0002458	-0.00037
29.04	0.00023	-0.00016	3e-05	2e-05	-0.00033	-0.00058	-0.0003158	-8e-05
29.28	-0.00029	0.00017	6e-05	1e-05	-0.00044	-0.00064	-0.0002858	-0.00013
29.52	0.00012	-0.00011	-2e-05	-0.00017	-0.00047	3.01e-05	-0.0004458	-0.00046
29.76	-0.0002	2e-05	0.00023	8e-05	-0.0006	-0.0003	-0.0002058	-0.00033
30	8e-05	1e-05	1e-05	0.00023	-7.9e-05	-0.00031	-0.0002358	-0.00017
30.24	0.00028	4e-05	0.00013	0.0003	-1.9e-05	0.00023	0.00017424	0.00011
30.48	0.00027	0.00019	0.00031	0.00049	-4.9e-05	0.00016	-5.76e-06	0.00028
30.72	-0.01002	-0.01024	-0.00965	-0.00988	-0.01155	-0.01139	-0.0117958	-0.0116
30.96	-0.05689	-0.06059	-0.05777	-0.05844	-0.05972	-0.06058	-0.0587358	-0.06073
31.2	0.02107	0.02274	0.01919	0.0208	0.021351	0.02494	0.0222442	0.01968
31.44	-0.0194	-0.0201	-0.01929	-0.0188	-0.02027	-0.01998	-0.0194658	-0.02122
31.68	0.00057	0.00112	0.00063	0.00113	0.001071	0.00082	0.00063424	0.00126
31.92	0.0007	0.00073	0.0005	0.00149	0.000701	0.0005	0.00064424	0.00121
32.16	0.00072	0.00121	0.00082	0.00132	0.000661	0.00084	0.00055424	0.0011
32.4	0.00101	0.00127	0.00084	0.00168	0.000271	0.00094	0.00064424	0.00108
32.64	0.00136	0.00155	0.00107	0.00188	0.000941	0.00114	0.00091424	0.00135
32.88	0.00115	0.00164	0.00095	0.00208	0.000951	0.00109	0.00057424	0.00184
33.12	0.00126	0.00182	0.0013	0.00207	0.000731	0.00166	0.00081424	0.00167
33.36	0.00149	0.00213	0.00141	0.0022	0.001271	0.00164	0.00124424	0.00177
33.6	0.00178	0.00212	0.00158	0.00232	0.001221	0.00165	0.00109424	0.00197
33.84	0.00204	0.00262	0.00145	0.00288	0.001041	0.00195	0.00174424	0.00203
34.08	0.00206	0.0027	0.00189	0.00265	0.001191	0.0019	0.00123424	0.00185
34.32	0.00204	0.00277	0.00171	0.0029	0.000981	0.00209	0.00118424	0.00215
34.56	0.00258	0.00305	0.00183	0.00278	0.001111	0.00219	0.00113424	0.00216
34.8	0.00258	0.00329	0.00188	0.00336	0.001461	0.00194	0.00129424	0.00242
35.04	0.0025	0.00303	0.00202	0.00338	0.001301	0.00201	0.00144424	0.00226
35.28	0.00279	0.00354	0.00236	0.00337	0.001591	0.00223	0.00154424	0.00216
35.52	0.00262	0.00374	0.00226	0.00353	0.001041	0.00259	0.00180424	0.00262
35.76	0.00321	0.00383	0.0025	0.00365	0.001701	0.00237	0.00179424	0.00267
36	0.00297	0.00408	0.00269	0.00377	0.001811	0.00258	0.00197424	0.00282
36.24	0.0031	0.00397	0.00265	0.00421	0.001561	0.00242	0.00210424	0.00278
36.48	0.00346	0.00409	0.00273	0.00405	0.001861	0.00243	0.00219424	0.00261
36.72	0.00362	0.00454	0.00302	0.00427	0.001661	0.00298	0.00188424	0.00275
36.96	0.00366	0.00442	0.00302	0.00406	0.001801	0.00277	0.00211424	0.00293
37.2	0.00383	0.00469	0.00308	0.0044	0.001941	0.00272	0.00226424	0.00316
37.44	0.00388	0.00492	0.00324	0.00425	0.002131	0.00259	0.00209424	0.00303
37.68	0.00409	0.00469	0.0031	0.00467	0.001961	0.00272	0.00254424	0.00334
37.92	0.00397	0.0048	0.00328	0.00464	0.002041	0.00317	0.00270424	0.00334
38.16	0.00441	0.00499	0.00341	0.00482	0.002311	0.00314	0.00230424	0.00332
38.4	0.00404	0.00553	0.00346	0.00478	0.001941	0.00345	0.00217424	0.0033
38.64	0.00414	0.00519	0.00365	0.00464	0.002161	0.00316	0.00249424	0.00313
38.88	0.00438	0.00545	0.00367	0.00478	0.002161	0.003	0.00275424	0.00309
39.12	0.00442	0.0057	0.00359	0.00478	0.002421	0.00323	0.00277424	0.00312
39.36	0.0049	0.0057	0.00353	0.00506	0.002111	0.00288	0.00271424	0.00374
39.6	0.00454	0.00584	0.00383	0.00508	0.002411	0.00377	0.00300424	0.00367
39.84	0.00461	0.00591	0.00378	0.00509	0.001991	0.00347	0.00278424	0.00377
40.08	0.00494	0.00596	0.00407	0.00549	0.002441	0.00287	0.00314424	0.00336
40.32	0.00496	0.00604	0.00404	0.00529	0.002661	0.00373	0.00305424	0.00346
40.56	0.00508	0.00601	0.00404	0.0057	0.002541	0.00359	0.00303424	0.00388
40.8	0.00538	0.00613	0.00417	0.00575	0.002601	0.00343	0.00299424	0.00381
41.04	0.00529	0.00648	0.00425	0.00563	0.002611	0.00313	0.00299424	0.00373
41.28	0.00525	0.00649	0.00431	0.0057	0.002921	0.00386	0.00310424	0.00374
41.52	0.00536	0.00655	0.00437	0.00578	0.002831	0.0037	0.00293424	0.00408
41.76	0.0059	0.0067	0.00452	0.00572	0.002921	0.00379	0.00318424	0.00392
42	0.00597	0.00666	0.00442	0.00586	0.002821	0.00391	0.00315424	0.00389
42.24	0.00581	0.00681	0.00449	0.00594	0.002821	0.00372	0.00291424	0.00396
42.48	0.00562	0.00706	0.00464	0.00619	0.002601	0.004	0.00313424	0.00389
42.72	0.00576	0.00672	0.00459	0.00618	0.002901	0.00357	0.00306424	0.00393
42.96	0.00602	0.00702	0.00467	0.00615	0.003081	0.0036	0.00315424	0.00395
43.2	0.0061	0.00711	0.0045	0.00624	0.002701	0.00384	0.00351424	0.00401
43.44	0.00612	0.00693	0.00479	0.00629	0.003111	0.00393	0.00327424	0.00423
43.68	0.00585	0.00697	0.00481	0.00627	0.002701	0.00392	0.00340424	0.00402
43.92	0.00619	0.00734	0.00494	0.00623	0.002971	0.00404	0.00327424	0.00402
44.16	0.00612	0.00726	0.00475	0.00652	0.003061	0.004	0.00376424	0.00404
44.4	0.00657	0.00745	0.00501	0.00646	0.002821	0.00406	0.00344424	0.00429
44.64	0.00639	0.00722	0.00498	0.00653	0.002821	0.00371	0.00337424	0.00408
44.88	0.00646	0.00739	0.00502	0.00623	0.002921	0.00389	0.00354424	0.00422
45.12	0.00668	0.00772	0.00505	0.00673	0.003121	0.00409	0.00343424	0.00407
45.36	0.00642	0.00745	0.0049	0.00659	0.003111	0.00376	0.00334424	0.00419
45.6	0.00659	0.00738	0.00489	0.00666	0.003161	0.00425	0.00362424	0.00449
45.84	0.0072	0.00761	0.005	0.00657	0.002971	0.00438	0.00352424	0.00427
46.08	0.00675	0.00755	0.00514	0.00659	0.003101	0.00416	0.00384424	0.00425
46.32	0.00666	0.00775	0.00534	0.00678	0.003501	0.00445	0.00355424	0.00413
46.56	0.00641	0.00783	0.00515	0.00697	0.003171	0.00395	0.00365424	0.00426
46.8	0.00683	0.0078	0.00549	0.00663	0.002871	0.00442	0.00354424	0.00423
47.04	0.00673	0.00784	0.00533	0.00705	0.002931	0.00378	0.00377424	0.00422
47.28	0.00683	0.00794	0.00548	0.00679	0.002951	0.0043	0.00403424	0.00471
47.52	0.00726	0.00803	0.00539	0.00704	0.003231	0.00426	0.00391424	0.00443
47.76	0.00746	0.00783	0.00559	0.00706	0.003241	0.00412	0.00372424	0.0043
48	0.00737	0.0077	0.00553	0.007	0.003021	0.00431	0.00367424	0.00413
48.24	0.00706	0.00802	0.00555	0.00686	0.003271	0.00455	0.00377424	0.00458
48.48	0.00707	0.00813	0.00573	0.00715	0.003611	0.00434	0.00403424	0.00464
48.72	0.00728	0.00831	0.00577	0.00671	0.003141	0.0044	0.00406424	0.00468
48.96	0.00706	0.00807	0.00564	0.0071	0.003231	0.00449	0.00391424	0.00456
49.2	0.00722	0.00789	0.00581	0.00696	0.003321	0.00439	0.00414424	0.00452
49.44	0.00724	0.00825	0.00567	0.00703	0.003141	0.00422	0.00408424	0.00464
49.68	0.00705	0.0083	0.00563	0.00716	0.003111	0.00441	0.00409424	0.00458
49.92	0.00751	0.0084	0.00583	0.00705	0.003051	0.00436	0.00383424	0.0043
50.16	0.00726	0.00829	0.00572	0.00709	0.003191	0.00441	0.00423424	0.00475
50.4	0.00747	0.00857	0.00564	0.00732	0.003281	0.0046	0.00392424	0.0046
50.64	0.00741	0.00843	0.00576	0.00746	0.003391	0.00451	0.00407424	0.00441
50.88	0.00737	0.00837	0.00561	0.00735	0.003391	0.00445	0.00396424	0.00448
51.12	0.00777	0.00823	0.00595	0.00761	0.003471	0.0042	0.00388424	0.00441
51.36	0.00763	0.00846	0.00566	0.00744	0.003321	0.00474	0.00408424	0.0045
51.6	0.00775	0.00828	0.00593	0.00737	0.003321	0.00452	0.00403424	0.00471
51.84	0.0078	0.0084	0.00597	0.00739	0.003471	0.00464	0.00423424	0.00444
52.08	0.00785	0.0087	0.00607	0.00762	0.003461	0.0045	0.00423424	0.00435
52.32	0.00782	0.00885	0.00591	0.00735	0.003311	0.00431	0.00388424	0.00451
52.56	0.00794	0.00861	0.00648	0.00732	0.003361	0.00469	0.00427424	0.00445
52.8	0.00797	0.00872	0.00604	0.00777	0.003751	0.00454	0.00433424	0.00445
53.04	0.00793	0.0087	0.00605	0.00766	0.003671	0.00438	0.00405424	0.00436
53.28	0.00784	0.0086	0.00613	0.00743	0.003121	0.00447	0.00450424	0.00473
53.52	0.00829	0.00859	0.0063	0.00774	0.002991	0.0048	0.00427424	0.00447
53.76	0.00785	0.00908	0.00632	0.00748	0.003221	0.00443	0.00398424	0.0044
54	0.00803	0.00872	0.00625	0.00766	0.003491	0.00461	0.00406424	0.00452
54.24	0.00771	0.00886	0.0061	0.00743	0.003701	0.00479	0.00384424	0.00456
54.48	0.00784	0.00911	0.00595	0.00756	0.003711	0.00468	0.00398424	0.0046
54.72	0.00821	0.00888	0.00591	0.0077	0.003831	0.00447	0.00391424	0.00493
54.96	0.00825	0.00895	0.00619	0.00756	0.003731	0.0047	0.00414424	0.0047
55.2	0.0075	0.00888	0.00647	0.00755	0.003651	0.00466	0.00446424	0.00495
55.44	0.00826	0.00904	0.00625	0.00793	0.003711	0.00504	0.00414424	0.00486
55.68	0.00849	0.00891	0.0063	0.00778	0.003671	0.00528	0.00399424	0.00483
55.92	0.00801	0.00882	0.0063	0.00771	0.003661	0.0048	0.00453424	0.00501
56.16	0.00828	0.00935	0.00633	0.00793	0.003731	0.00459	0.00396424	0.0045
56.4	0.00816	0.00904	0.00612	0.00779	0.003281	0.00441	0.00402424	0.00471
56.64	0.00836	0.00912	0.00656	0.00757	0.003551	0.00457	0.00420424	0.00483
56.88	0.00846	0.00896	0.00636	0.00787	0.003661	0.0049	0.00412424	0.00471
57.12	0.00847	0.00931	0.00638	0.00767	0.003931	0.00479	0.00423424	0.00463
57.36	0.00826	0.00915	0.00661	0.00794	0.004021	0.00491	0.00437424	0.00431
57.6	0.00859	0.00915	0.00664	0.00802	0.003781	0.00493	0.00435424	0.00475
57.84	0.00856	0.00928	0.0064	0.00777	0.003951	0.00453	0.00420424	0.00501
58.08	0.00839	0.00933	0.00664	0.00778	0.003861	0.00476	0.00414424	0.00473
58.32	0.00851	0.00916	0.00656	0.00794	0.003881	0.00468	0.00404424	0.00448
58.56	0.00842	0.00893	0.00629	0.00786	0.003971	0.00485	0.00388424	0.00444
58.8	0.00871	0.00934	0.00656	0.00777	0.003451	0.00456	0.00405424	0.00465
59.04	0.00866	0.00914	0.00654	0.00775	0.003591	0.00487	0.00427424	0.00477
59.28	0.00861	0.00935	0.00676	0.0081	0.003721	0.00516	0.00413424	0.0049
59.52	0.00886	0.00941	0.00663	0.00797	0.004091	0.00494	0.00422424	0.00463
59.76	0.00872	0.00922	0.00665	0.00807	0.004041	0.00489	0.00437424	0.00464
60	0.0087	0.0093	0.00664	0.00801	0.003851	0.00474	0.00434424	0.00508
60.24	0.00827	0.00932	0.00645	0.00812	0.003671	0.00494	0.00415424	0.00478
60.48	0.00881	0.00923	0.00685	0.00787	0.003811	0.00502	0.00426424	0.00468
60.72	0.00897	0.00945	0.00675	0.00798	0.003921	0.00484	0.00435424	0.00481
60.96	0.00838	0.00942	0.00684	0.00795	0.003871	0.00486	0.00446424	0.00469
61.2	0.00922	0.00952	0.00656	0.00818	0.004101	0.00494	0.00444424	0.00474
61.44	0.00893	0.0093	0.00662	0.00808	0.003871	0.00491	0.00420424	0.00456
61.68	0.00883	0.00961	0.00659	0.00819	0.003801	0.00495	0.00413424	0.00492
61.92	0.0089	0.00944	0.00681	0.00815	0.003811	0.00463	0.00418424	0.0048
62.16	0.00865	0.00951	0.00643	0.00828	0.003801	0.00475	0.00415424	0.0047
62.4	0.00894	0.00951	0.00683	0.00786	0.004001	0.00475	0.00409424	0.00449
62.64	0.00905	0.00955	0.00679	0.00847	0.003891	0.00485	0.00448424	0.00497
62.88	0.00895	0.00976	0.00671	0.00825	0.003931	0.00471	0.00417424	0.00494
63.12	0.00861	0.00983	0.00705	0.00809	0.003781	0.00455	0.00414424	0.00482
63.36	0.00881	0.0097	0.00679	0.00817	0.003991	0.005	0.00426424	0.00492
63.6	0.00894	0.00977	0.00685	0.00843	0.003741	0.005	0.00443424	0.00484
63.84	0.00878	0.00984	0.00671	0.00842	0.003641	0.00496	0.00417424	0.00499
64.08	0.00905	0.00986	0.00696	0.00826	0.003801	0.00479	0.00458424	0.00486
64.32	0.00899	0.00979	0.00674	0.00832	0.003921	0.0047	0.00438424	0.00467
64.56	0.00895	0.00992	0.00679	0.00828	0.003921	0.00494	0.00428424	0.00475
64.8	0.00912	0.00994	0.00691	0.00843	0.003651	0.00489	0.00424424	0.00494
65.04	0.00895	0.00971	0.00674	0.00847	0.003851	0.00516	0.00433424	0.00486
65.28	0.00875	0.00976	0.00674	0.0083	0.004021	0.00477	0.00452424	0.00498
65.52	0.00889	0.00966	0.00677	0.00838	0.004031	0.00473	0.00449424	0.00504
65.76	0.00892	0.00969	0.00696	0.00844	0.003391	0.00523	0.00432424	0.00492
66	0.00919	0.00975	0.00686	0.00859	0.004201	0.00499	0.00467424	0.00512
66.24	0.00906	0.0099	0.00712	0.00839	0.003591	0.00537	0.00463424	0.0048
66.48	0.00915	0.00997	0.00679	0.00873	0.004031	0.00493	0.00464424	0.00505
66.72	0.00918	0.00979	0.0069	0.00858	0.003891	0.00492	0.00424424	0.005
66.96	0.00919	0.01015	0.00698	0.0084	0.003811	0.00491	0.00427424	0.00495
67.2	0.00921	0.00988	0.00704	0.00841	0.004331	0.00527	0.00452424	0.00475
67.44	0.00923	0.00989	0.00678	0.00855	0.003511	0.005	0.00434424	0.00498
67.68	0.00943	0.00973	0.00698	0.0083	0.004301	0.00487	0.00460424	0.005
67.92	0.00912	0.00986	0.00702	0.00822	0.003901	0.00474	0.00455424	0.00501
68.16	0.00907	0.01022	0.00684	0.00855	0.004021	0.00479	0.00428424	0.00528
68.4	0.00931	0.00983	0.00663	0.00852	0.003941	0.00493	0.00414424	0.00459
68.64	0.00926	0.00977	0.00697	0.0084	0.004461	0.0051	0.00411424	0.00494
68.88	0.00929	0.00985	0.00672	0.00842	0.003941	0.00519	0.00437424	0.0049
69.12	0.00924	0.00983	0.00689	0.00844	0.003991	0.00484	0.00444424	0.0049
69.36	0.00947	0.0099	0.00725	0.00842	0.003991	0.00481	0.00440424	0.00496
69.6	0.00913	0.00988	0.00706	0.00855	0.004041	0.00481	0.00437424	0.00499
69.84	0.00904	0.00992	0.00715	0.00848	0.003751	0.00479	0.00448424	0.00502
70.08	0.00939	0.01002	0.00726	0.0085	0.003741	0.00488	0.00432424	0.00494
70.32	0.00935	0.01003	0.00715	0.00864	0.004361	0.00479	0.00450424	0.00481
70.56	0.00957	0.01005	0.00692	0.00866	0.003891	0.00513	0.00433424	0.00468
70.8	0.00931	0.00966	0.00711	0.00836	0.003691	0.00529	0.00453424	0.00479
71.04	0.00921	0.01028	0.00701	0.00878	0.003781	0.00523	0.00452424	0.00509
71.28	0.00935	0.00988	0.00697	0.00856	0.004321	0.00502	0.00458424	0.00489
71.52	0.00938	0.01016	0.00718	0.00864	0.004271	0.00488	0.00432424	0.00491
71.76	0.00955	0.00984	0.00727	0.0086	0.003791	0.00506	0.00430424	0.00486
72	0.00941	0.0101	0.00714	0.00881	0.003911	0.00506	0.00444424	0.0052
72.24	0.00955	0.01007	0.00694	0.00874	0.003901	0.00513	0.00459424	0.00527
72.48	0.00944	0.00993	0.00737	0.00872	0.003851	0.0049	0.00471424	0.00472
72.72	0.00957	0.01017	0.00743	0.00863	0.004411	0.00517	0.00452424	0.00501
72.96	0.00956	0.01009	0.00699	0.00856	0.003811	0.00539	0.00427424	0.00504
73.2	0.00951	0.01013	0.00726	0.00854	0.004241	0.00487	0.00438424	0.00489
73.44	0.00927	0.01031	0.00742	0.00832	0.003901	0.00495	0.00433424	0.00513
73.68	0.00928	0.0102	0.00715	0.00879	0.004201	0.00535	0.00431424	0.00494
73.92	0.00952	0.01013	0.00708	0.00849	0.004171	0.0049	0.00425424	0.00506
74.16	0.00926	0.01021	0.00717	0.00844	0.003991	0.00533	0.00431424	0.00476
74.4	0.00945	0.01031	0.00706	0.00901	0.004551	0.00498	0.00465424	0.00482
74.64	0.00945	0.00994	0.0072	0.00858	0.004251	0.00501	0.00433424	0.0049
74.88	0.00958	0.0102	0.00713	0.00856	0.004211	0.00488	0.00429424	0.00533
75.12	0.00932	0.01029	0.00721	0.00841	0.004141	0.0049	0.00458424	0.00485
75.36	0.00955	0.01017	0.00712	0.00852	0.004171	0.0049	0.00457424	0.00506
75.6	0.0095	0.01023	0.00711	0.00874	0.004021	0.00477	0.00444424	0.00504
75.84	0.00982	0.01028	0.00723	0.00872	0.003761	0.00508	0.00452424	0.0053
76.08	0.00941	0.01033	0.00709	0.00883	0.003891	0.00483	0.00452424	0.00494
76.32	0.00946	0.01029	0.00748	0.00861	0.004321	0.00505	0.00419424	0.00502
76.56	0.00943	0.01035	0.00741	0.00863	0.004251	0.00524	0.00439424	0.00528
76.8	0.00975	0.0104	0.00751	0.00879	0.004081	0.00513	0.00455424	0.0051
77.04	0.00966	0.01031	0.0073	0.00869	0.004201	0.00532	0.00459424	0.00504
77.28	0.0099	0.01011	0.00718	0.00864	0.004211	0.00488	0.00463424	0.00495
77.52	0.00968	0.01026	0.00748	0.00871	0.004201	0.00513	0.00476424	0.00527
77.76	0.00985	0.01033	0.00723	0.00891	0.003961	0.00492	0.00463424	0.00501
78	0.00982	0.01054	0.0077	0.00867	0.004061	0.00527	0.00398424	0.00511
78.24	0.00959	0.0106	0.00739	0.00892	0.004321	0.00502	0.00438424	0.00493
78.48	0.00972	0.01042	0.00732	0.00905	0.004111	0.0049	0.00459424	0.00496
78.72	0.00983	0.01065	0.00738	0.00881	0.004201	0.00479	0.00440424	0.00522
78.96	0.0097	0.01044	0.00742	0.00904	0.004301	0.00521	0.00449424	0.00496
79.2	0.01004	0.01032	0.00727	0.0087	0.003761	0.00503	0.00406424	0.00479
79.44	0.00959	0.01027	0.00757	0.00888	0.003781	0.00488	0.00453424	0.00501
79.68	0.00996	0.01025	0.00721	0.00889	0.004271	0.00497	0.00449424	0.005
79.92	0.00978	0.01041	0.00742	0.00869	0.004541	0.00512	0.00456424	0.00494
80.16	0.00998	0.0102	0.00721	0.00864	0.004221	0.00489	0.00435424	0.00519
80.4	0.0099	0.01075	0.00767	0.00876	0.004141	0.00536	0.00444424	0.00498
80.64	0.00987	0.01047	0.00751	0.00856	0.003951	0.00522	0.00445424	0.0054
80.88	0.01011	0.01063	0.00738	0.00863	0.004501	0.00507	0.00408424	0.00505
81.12	0.00984	0.01034	0.00729	0.0091	0.004091	0.00487	0.00441424	0.00498
81.36	0.00991	0.01044	0.00759	0.00876	0.004041	0.0049	0.00455424	0.00495
81.6	0.01014	0.01041	0.00725	0.00858	0.004611	0.00494	0.00427424	0.00493
81.84	0.00972	0.01032	0.00756	0.00896	0.003821	0.00501	0.00440424	0.00491
82.08	0.01008	0.01058	0.00728	0.00875	0.004311	0.0052	0.00453424	0.00464
82.32	0.00988	0.01069	0.00739	0.00894	0.004071	0.0047	0.00463424	0.00503
82.56	0.00984	0.01049	0.00736	0.00871	0.004391	0.00492	0.00467424	0.00506
82.8	0.01	0.01066	0.00733	0.00872	0.004251	0.00489	0.00434424	0.00499
83.04	0.01042	0.01044	0.00748	0.00885	0.004121	0.005	0.00446424	0.00483
83.28	0.01015	0.01038	0.0074	0.00887	0.003981	0.00509	0.00478424	0.00516
83.52	0.00993	0.01055	0.00773	0.009	0.004161	0.00477	0.00430424	0.00491
83.76	0.00982	0.0104	0.00774	0.00902	0.004411	0.00498	0.00449424	0.00513
84	0.00993	0.01037	0.00764	0.00877	0.004211	0.00478	0.00414424	0.00486
84.24	0.01007	0.01068	0.00765	0.00887	0.004061	0.00493	0.00440424	0.00481
84.48	0.00986	0.0104	0.00741	0.00882	0.003981	0.00512	0.00460424	0.00543
84.72	0.0099	0.01049	0.00763	0.00907	0.003951	0.00503	0.00406424	0.00501
84.96	0.01044	0.01063	0.0075	0.00902	0.004141	0.00471	0.00444424	0.00462
85.2	0.01008	0.01069	0.00745	0.00858	0.004581	0.00509	0.00423424	0.00511
85.44	0.00992	0.01061	0.00754	0.00891	0.004241	0.00491	0.00441424	0.00498
85.68	0.00999	0.01061	0.00751	0.00898	0.004381	0.00516	0.00442424	0.00524
85.92	0.00984	0.01053	0.00733	0.00888	0.004381	0.00498	0.00447424	0.00477
86.16	0.00972	0.01073	0.00735	0.00891	0.004221	0.00489	0.00487424	0.00504
86.4	0.01005	0.01067	0.00778	0.00905	0.004151	0.00498	0.00432424	0.00485
86.64	0.01025	0.01063	0.00776	0.00872	0.004371	0.00493	0.00438424	0.00492
86.88	0.01046	0.0108	0.00763	0.00892	0.004161	0.00432	0.00462424	0.00537
87.12	0.01012	0.01052	0.00775	0.00907	0.003911	0.00464	0.00443424	0.00456
87.36	0.01036	0.01043	0.00737	0.00907	0.004001	0.00465	0.00457424	0.00483
87.6	0.00989	0.0106	0.0076	0.00904	0.004121	0.00499	0.00443424	0.00512
87.84	0.01016	0.01091	0.00781	0.00908	0.004331	0.00498	0.00463424	0.00479
88.08	0.01003	0.01058	0.00769	0.00922	0.004011	0.00461	0.00427424	0.00502
88.32	0.01028	0.01052	0.00761	0.0091	0.003921	0.00476	0.00469424	0.00502
88.56	0.01014	0.01066	0.00746	0.00929	0.004111	0.00505	0.00439424	0.00518
88.8	0.01012	0.01055	0.00775	0.00921	0.004121	0.0048	0.00433424	0.00513
89.04	0.00983	0.01077	0.00744	0.00895	0.004431	0.00545	0.00444424	0.00507
89.28	0.01017	0.01038	0.00756	0.0091	0.004131	0.00513	0.00429424	0.00507
89.52	0.01018	0.01059	0.00762	0.00886	0.004331	0.00477	0.00445424	0.00511
89.76	0.01021	0.0107	0.00771	0.00917	0.004051	0.00473	0.00451424	0.00461
90	0.01061	0.01095	0.00756	0.00907	0.004031	0.00486	0.00428424	0.00497
90.24	0.01032	0.0106	0.00753	0.00917	0.003911	0.00479	0.00418424	0.00498
90.48	0.01027	0.01077	0.00774	0.00886	0.003911	0.00473	0.00459424	0.00486
90.72	0.0103	0.01092	0.00772	0.00914	0.004341	0.00484	0.00473424	0.00466
90.96	0.01057	0.01062	0.00746	0.00895	0.004171	0.00454	0.00449424	0.00502
91.2	0.01042	0.01066	0.00785	0.00928	0.004581	0.00493	0.00444424	0.00489
91.44	0.01038	0.01077	0.00766	0.0094	0.004291	0.00468	0.00432424	0.00495
91.68	0.01011	0.01109	0.0076	0.00902	0.004211	0.0046	0.00441424	0.00516
91.92	0.0104	0.01096	0.00763	0.00914	0.004091	0.00513	0.00449424	0.00498
92.16	0.01026	0.01065	0.0076	0.00936	0.004591	0.00477	0.00432424	0.00508
92.4	0.01024	0.01086	0.00764	0.00884	0.004261	0.0049	0.00442424	0.00488
92.64	0.00996	0.01067	0.00775	0.00893	0.003941	0.00489	0.00419424	0.00514
92.88	0.01039	0.01099	0.00749	0.00893	0.004131	0.00511	0.00424424	0.00472
93.12	0.01028	0.01112	0.00799	0.00935	0.004321	0.00459	0.00430424	0.0053
93.36	0.01029	0.01058	0.0079	0.00926	0.004251	0.00509	0.00438424	0.00473
93.6	0.01013	0.01087	0.00797	0.00939	0.003921	0.00512	0.00403424	0.0049
93.84	0.01023	0.01075	0.0075	0.00903	0.004151	0.00508	0.00439424	0.0048
94.08	0.0104	0.0105	0.00777	0.00908	0.003961	0.00502	0.00452424	0.0047
94.32	0.01038	0.01096	0.00764	0.00947	0.004001	0.00478	0.00436424	0.00482
94.56	0.01049	0.01098	0.00776	0.00915	0.004231	0.0047	0.00419424	0.00492
94.8	0.0101	0.01104	0.00745	0.00941	0.004031	0.00468	0.00419424	0.00459
95.04	0.0105	0.01101	0.00777	0.00915	0.004081	0.00486	0.00422424	0.00474
95.28	0.01025	0.01089	0.00776	0.00932	0.004181	0.0048	0.00432424	0.005
95.52	0.01022	0.01083	0.00785	0.00925	0.004371	0.0049	0.00437424	0.00529
95.76	0.01009	0.0111	0.00782	0.00896	0.004071	0.0049	0.00428424	0.00481
96	0.01013	0.01093	0.00785	0.00914	0.004291	0.00498	0.00448424	0.00494
96.24	0.01036	0.01092	0.00738	0.00949	0.003901	0.00479	0.00410424	0.00469
96.48	0.01045	0.01081	0.00783	0.00942	0.004031	0.0049	0.00428424	0.00487
96.72	0.01035	0.01107	0.00782	0.00914	0.004171	0.00475	0.00440424	0.0051
96.96	0.01036	0.0111	0.00783	0.00912	0.004801	0.00485	0.00440424	0.00483
97.2	0.01034	0.01106	0.0078	0.00909	0.004371	0.00515	0.00449424	0.00493
97.44	0.00993	0.01097	0.00744	0.00915	0.004121	0.0051	0.00456424	0.00463
97.68	0.01051	0.01081	0.00781	0.00902	0.003721	0.00505	0.00432424	0.0052
97.92	0.01047	0.01075	0.00778	0.00925	0.004371	0.00477	0.00432424	0.00492
98.16	0.01032	0.01113	0.00791	0.00922	0.004011	0.00511	0.00464424	0.00497
98.4	0.01016	0.01091	0.00764	0.00929	0.003861	0.00465	0.00435424	0.0049
98.64	0.01035	0.01109	0.0078	0.00916	0.004041	0.0051	0.00438424	0.00473
98.88	0.01002	0.01107	0.00774	0.00909	0.003741	0.00476	0.00420424	0.00483
99.12	0.01035	0.01117	0.00805	0.00949	0.004281	0.00487	0.00449424	0.00495
99.36	0.01044	0.01081	0.00796	0.00913	0.003971	0.00469	0.00447424	0.00519
99.6	0.01024	0.01095	0.00767	0.00924	0.003911	0.00441	0.00441424	0.00511
99.84	0.01024	0.01118	0.00775	0.00933	0.003941	0.00495	0.00438424	0.00509
100.08	0.01071	0.01122	0.00767	0.00908	0.003891	0.00474	0.00427424	0.00479
100.32	0.01068	0.01091	0.00786	0.0091	0.004161	0.00516	0.00437424	0.00494
100.56	0.01026	0.01129	0.00776	0.00945	0.004311	0.00499	0.00426424	0.00493
100.8	0.0103	0.01082	0.00785	0.00916	0.004641	0.00502	0.00421424	0.00455
101.04	0.01026	0.01089	0.00763	0.00927	0.004181	0.00516	0.00453424	0.00488
101.28	0.01058	0.01102	0.00795	0.00903	0.004061	0.00475	0.00396424	0.00451
101.52	0.01066	0.01106	0.00797	0.00933	0.004201	0.00454	0.00398424	0.00502
101.76	0.01035	0.01102	0.00786	0.00949	0.004151	0.00448	0.00431424	0.0051
102	0.01052	0.01064	0.0079	0.00924	0.004191	0.00481	0.00424424	0.00468
102.24	0.01044	0.01105	0.0078	0.00945	0.004181	0.00495	0.00438424	0.00496
102.48	0.0104	0.01096	0.00778	0.00941	0.004151	0.00467	0.00428424	0.00503
102.72	0.01067	0.01082	0.00794	0.00921	0.004191	0.00457	0.00440424	0.00498
102.96	0.01042	0.01109	0.00778	0.00916	0.004421	0.00475	0.00426424	0.00491
103.2	0.0105	0.0109	0.00775	0.00934	0.004001	0.00457	0.00446424	0.00484
103.44	0.01054	0.01091	0.00768	0.00917	0.003971	0.00484	0.00440424	0.00478
103.68	0.01072	0.01115	0.00811	0.00913	0.003941	0.0045	0.00434424	0.00482
103.92	0.01057	0.01102	0.00777	0.00943	0.004271	0.00473	0.00433424	0.00504
104.16	0.01044	0.01111	0.0079	0.00927	0.004251	0.00473	0.00460424	0.00523
104.4	0.01038	0.01073	0.00792	0.00919	0.004391	0.0046	0.00434424	0.00492
104.64	0.01035	0.01093	0.00789	0.00923	0.003841	0.0049	0.00417424	0.00445
104.88	0.01026	0.0111	0.008	0.00936	0.004391	0.00475	0.00413424	0.00485
105.12	0.01048	0.01086	0.00788	0.00924	0.003891	0.00477	0.00449424	0.0044
105.36	0.0104	0.01124	0.00781	0.00927	0.004151	0.00494	0.00434424	0.00494
105.6	0.01086	0.01128	0.00775	0.00911	0.003491	0.00451	0.00415424	0.00456
105.84	0.01061	0.01098	0.00791	0.00941	0.004041	0.00466	0.00428424	0.00485
106.08	0.01058	0.01113	0.00795	0.00914	0.004301	0.00478	0.00413424	0.00447
106.32	0.0106	0.0109	0.00779	0.00953	0.004121	0.00474	0.00418424	0.00451
106.56	0.01018	0.01094	0.00799	0.00944	0.004311	0.00479	0.00426424	0.00494
106.8	0.01066	0.01124	0.00778	0.0093	0.004041	0.00465	0.00413424	0.00466
107.04	0.01043	0.01093	0.00781	0.00956	0.004001	0.00533	0.00408424	0.00483
107.28	0.01056	0.01107	0.00788	0.00917	0.004391	0.0048	0.00408424	0.00481
107.52	0.0106	0.01101	0.00787	0.00927	0.004141	0.00468	0.00416424	0.00485
107.76	0.01053	0.01084	0.00796	0.0094	0.004541	0.00446	0.00389424	0.00488
108	0.0106	0.01092	0.00788	0.00897	0.004211	0.00495	0.00441424	0.00485
108.24	0.01056	0.01092	0.00791	0.00945	0.003731	0.00483	0.00404424	0.0046
108.48	0.0103	0.01096	0.00812	0.00935	0.004121	0.0042	0.00420424	0.00474
108.72	0.01068	0.01115	0.008	0.00946	0.004291	0.00456	0.00423424	0.00482
108.96	0.01043	0.01104	0.00768	0.00954	0.003931	0.00497	0.00411424	0.00509
109.2	0.01085	0.01089	0.00806	0.00938	0.004311	0.00427	0.00399424	0.00492
109.44	0.01105	0.01078	0.00799	0.00936	0.004351	0.00437	0.00435424	0.0049
109.68	0.01057	0.01117	0.00814	0.00954	0.003771	0.00457	0.00427424	0.00481
109.92	0.01048	0.01102	0.00821	0.0094	0.003771	0.00426	0.00429424	0.00461
110.16	0.01052	0.01126	0.00799	0.00948	0.003911	0.00448	0.00410424	0.00487
110.4	0.01062	0.01127	0.00798	0.00974	0.003541	0.00496	0.00413424	0.00458
110.64	0.01079	0.01125	0.00795	0.00948	0.004281	0.00472	0.00418424	0.00474
110.88	0.01048	0.01116	0.00807	0.00938	0.003901	0.00446	0.00396424	0.00473
111.12	0.01085	0.01097	0.0079	0.00935	0.003881	0.00469	0.00419424	0.00467
111.36	0.01053	0.01131	0.00797	0.00942	0.004261	0.0047	0.00414424	0.00502
111.6	0.01061	0.01104	0.0079	0.00944	0.004191	0.00479	0.00407424	0.00478
111.84	0.01089	0.01128	0.00779	0.00934	0.004101	0.00447	0.00428424	0.00476
112.08	0.01055	0.01112	0.00805	0.00945	0.004091	0.00512	0.00399424	0.00512
112.32	0.01056	0.01108	0.00803	0.00944	0.004171	0.004	0.00445424	0.0047
112.56	0.01065	0.01144	0.00781	0.00951	0.004331	0.00455	0.00387424	0.00489
112.8	0.0107	0.01086	0.00792	0.00955	0.004261	0.00433	0.00412424	0.00479
113.04	0.01051	0.0115	0.00794	0.00961	0.004101	0.00489	0.00380424	0.00488
113.28	0.01064	0.01107	0.00791	0.00945	0.003921	0.00482	0.00408424	0.00456
113.52	0.01064	0.01108	0.00773	0.00915	0.004291	0.00424	0.00425424	0.00452
113.76	0.01066	0.01133	0.00811	0.00945	0.004291	0.0046	0.00388424	0.0047
114	0.01078	0.01119	0.00813	0.00942	0.003881	0.00431	0.00422424	0.00455
114.24	0.01071	0.01104	0.00775	0.00947	0.004311	0.00453	0.00413424	0.00436
114.48	0.01092	0.01134	0.00785	0.00942	0.003901	0.00456	0.00443424	0.00455
114.72	0.01086	0.01147	0.00797	0.00916	0.004031	0.00448	0.00392424	0.00473
114.96	0.01084	0.01074	0.00803	0.00949	0.003791	0.00458	0.00411424	0.00477
115.2	0.01084	0.01124	0.00796	0.00931	0.003981	0.00441	0.00385424	0.00482
115.44	0.01061	0.0111	0.00809	0.00944	0.004321	0.00449	0.00403424	0.00456
115.68	0.01058	0.01119	0.00794	0.00953	0.004091	0.00485	0.00414424	0.0049
115.92	0.01072	0.0114	0.00805	0.00919	0.004141	0.00427	0.00401424	0.00473
116.16	0.01072	0.01114	0.0082	0.0094	0.004181	0.0046	0.00387424	0.00463
116.4	0.01073	0.01137	0.00781	0.00935	0.004031	0.00475	0.00399424	0.00499
116.64	0.0111	0.01115	0.00772	0.00954	0.003971	0.00476	0.00393424	0.00458
116.88	0.01059	0.01124	0.00809	0.00942	0.004071	0.00435	0.00400424	0.00487
117.12	0.01081	0.01152	0.00783	0.0096	0.004171	0.00468	0.00379424	0.00468
117.36	0.01064	0.01105	0.00816	0.00966	0.004131	0.00433	0.00396424	0.00415
117.6	0.01117	0.01145	0.00808	0.00921	0.003531	0.00427	0.00414424	0.0044
117.84	0.01074	0.01111	0.00793	0.00955	0.004211	0.00483	0.00416424	0.00466
118.08	0.01067	0.01149	0.00765	0.00951	0.004201	0.00452	0.00408424	0.00467
118.32	0.01073	0.01114	0.00797	0.00944	0.003811	0.00455	0.00412424	0.00499
118.56	0.01069	0.01127	0.00794	0.00981	0.004311	0.00476	0.00393424	0.00446
118.8	0.01072	0.01153	0.00785	0.00953	0.004051	0.00431	0.00422424	0.0048
119.04	0.01085	0.01104	0.00768	0.00956	0.003811	0.00475	0.00414424	0.00446
119.28	0.01114	0.01125	0.00788	0.00949	0.003931	0.00464	0.00435424	0.00508
119.52	0.01091	0.01117	0.00804	0.00988	0.003851	0.00423	0.00381424	0.00465
119.76	0.00396	0.00532	0.00515	0.00477	0.00474	0.00415	0.00522	0.00433
