# Supplementary material for: Complementary biosensors reveal different G-protein signaling modes triggered by GPCRs and non-receptor activators
Source: eLife. 2021 Mar 31;10:e65620. doi: 10.7554/eLife.65620 (PMC8034979; doi:10.7554/eLife.65620)
Supplement: Figure 6—source data 1. [file elife-65620-fig6-data1.xlsx]

## Sheet: Bar Graph
		Exp1	Exp2	Exp3	Exp4
Control		0.00374	0.00398	0.00456	0.00451
R12 GL		0.00293	0.00247	0.00275	0.00252
GIV GBA		0.00406	0.00344	0.00414	0.00368
AGS1*		0.00253	0.00236	0.00249	0.00213

## Sheet: Control
Time	Exp1	Exp2	Exp3	Exp4
0	-0.0001	2e-05	-5e-05	-0.00017
0.24	-0.0001	0.00011	3e-05	8e-05
0.48	2e-05	-5e-05	7e-05	0
0.72	-0.00028	-0.00011	0.00011	-0.00012
0.96	-0.00024	3e-05	2e-05	0.00012
1.2	8e-05	-2e-05	-8e-05	0.00014
1.44	-0.00013	8e-05	-0.00013	6e-05
1.68	-0.00011	-0.00013	-5e-05	-5e-05
1.92	7e-05	0.00012	-1e-05	0
2.16	-4e-05	4e-05	4e-05	0
2.4	0.00038	-0.00012	-5e-05	-1e-05
2.64	-0.00022	3e-05	5e-05	0.00012
2.88	-0.00015	-8e-05	-0.00032	-5e-05
3.12	-8e-05	9e-05	0	-3e-05
3.36	-3e-05	-5e-05	-3e-05	0.00016
3.6	5e-05	-0.00021	-0.00012	-0.00018
3.84	3e-05	0	0.00014	-2e-05
4.08	4e-05	4e-05	7e-05	2e-05
4.32	-1e-05	-1e-05	0.00015	-3e-05
4.56	-5e-05	5e-05	0.00011	0.00023
4.8	5e-05	0.00021	5e-05	2e-05
5.04	-6e-05	0.0002	-2e-05	-8e-05
5.28	-0.00028	0.00011	-6e-05	-7e-05
5.52	-0.00015	0.00017	0	-0.00012
5.76	5e-05	9e-05	0.00022	6e-05
6	-1e-05	-1e-05	5e-05	4e-05
6.24	0.00013	3e-05	-0.00019	1e-05
6.48	-0.00012	0.00016	-6e-05	0.00013
6.72	6e-05	-0.00016	-5e-05	-1e-05
6.96	-0.00011	-6e-05	0.00019	3e-05
7.2	-6e-05	0.00019	-0.00022	-2e-05
7.44	0.00025	-0.00011	-0.00014	-3e-05
7.68	4e-05	0.00017	7e-05	-0.00013
7.92	-4e-05	6e-05	0	-4e-05
8.16	6e-05	2e-05	5e-05	2e-05
8.4	0.0001	3e-05	-2e-05	6e-05
8.64	3e-05	0.00012	-3e-05	5e-05
8.88	-3e-05	0.00013	-8e-05	-0.0002
9.12	-0.00021	-5e-05	7e-05	1e-05
9.36	-0.0002	0.00014	-0.00016	5e-05
9.6	0	0.00016	0.00012	7e-05
9.84	6e-05	-3e-05	-0.00017	-2e-05
10.08	-0.0001	-0.0001	-2e-05	-0.00018
10.32	-0.00019	9e-05	-0.00021	-0.00012
10.56	-1e-05	2e-05	-0.0001	0.00014
10.8	-3e-05	-0.00013	0.00014	-9e-05
11.04	5e-05	0	-0.00012	-0.0001
11.28	0.00012	-0.00015	-0.00014	-3e-05
11.52	0.0001	7e-05	6e-05	6e-05
11.76	6e-05	-1e-05	-2e-05	0.00018
12	-5e-05	9e-05	-7e-05	0
12.24	-2e-05	6e-05	-3e-05	-1e-05
12.48	0.00013	-1e-05	-4e-05	-3e-05
12.72	0	-0.0001	-0.0001	-6e-05
12.96	0.00031	-1e-05	0.00017	-5e-05
13.2	0.0001	-1e-05	-7e-05	-0.00018
13.44	5e-05	7e-05	-1e-05	-6e-05
13.68	6e-05	5e-05	0.00014	-7e-05
13.92	-0.00029	-8e-05	6e-05	-1e-05
14.16	-1e-05	-8e-05	-0.0001	5e-05
14.4	-0.00018	-3e-05	0.0002	-1e-05
14.64	-0.00011	-2e-05	-1e-05	-0.0001
14.88	0.00011	-0.0002	7e-05	-0.00012
15.12	8e-05	-0.0001	4e-05	-0.0001
15.36	-5e-05	-2e-05	0.00015	0.00018
15.6	1e-05	-4e-05	-0.00018	8e-05
15.84	-5e-05	9e-05	-3e-05	0.00016
16.08	2e-05	-4e-05	7e-05	-1e-05
16.32	9e-05	2e-05	-8e-05	0.00025
16.56	0.00012	-0.00024	0.00019	0.00014
16.8	0.0001	-6e-05	-0.00011	1e-05
17.04	9e-05	3e-05	6e-05	-0.00015
17.28	3e-05	0.00012	0.0001	7e-05
17.52	0.00012	6e-05	-0.00026	0.0001
17.76	-8e-05	-0.00022	-4e-05	0
18	-4e-05	-5e-05	0.00011	1e-05
18.24	-0.00011	0	4e-05	1e-05
18.48	-0.00016	7e-05	0.00018	3e-05
18.72	-0.00019	-6e-05	-4e-05	-1e-05
18.96	0.00011	-0.00011	-2e-05	0.00017
19.2	-7e-05	4e-05	-0.00017	0.00011
19.44	0.00012	7e-05	0.00031	-6e-05
19.68	-1e-05	7e-05	0.00025	-2e-05
19.92	0.00011	-4e-05	-3e-05	7e-05
20.16	4e-05	-2e-05	3e-05	-8e-05
20.4	-7e-05	-6e-05	0	0.00019
20.64	-9e-05	-0.0002	-0.00012	-0.00011
20.88	-0.00016	-2e-05	-7e-05	-0.00037
21.12	0.00025	1e-05	0.00019	-3e-05
21.36	-6e-05	-4e-05	-9e-05	0.00014
21.6	-2e-05	-0.00017	0.00013	-6e-05
21.84	0.00011	-3e-05	6e-05	5e-05
22.08	0.00014	-1e-05	8e-05	-7e-05
22.32	-7e-05	-0.00016	-9e-05	-2e-05
22.56	-3e-05	3e-05	0.00011	-6e-05
22.8	-9e-05	-0.00016	-8e-05	-8e-05
23.04	0.00011	7e-05	-6e-05	0.00011
23.28	-1e-05	7e-05	-0.00012	-4e-05
23.52	0.0001	-4e-05	0.00018	0.00016
23.76	-0.00022	-0.00031	7e-05	0.00016
24	9e-05	6e-05	3e-05	0
24.24	-6e-05	7e-05	-9e-05	-5e-05
24.48	-0.0002	-0.00019	1e-05	0.00014
24.72	-3e-05	-1e-05	-0.0001	3e-05
24.96	-3e-05	5e-05	-0.0001	-8e-05
25.2	4e-05	3e-05	0.00018	0.00019
25.44	3e-05	-3e-05	7e-05	-5e-05
25.68	0.00017	9e-05	-8e-05	9e-05
25.92	-9e-05	0.00018	-0.0002	-0.00014
26.16	0.0002	3e-05	-0.0001	0.00011
26.4	0.00016	0.00015	-2e-05	2e-05
26.64	0.00012	-8e-05	-3e-05	-0.00012
26.88	0.00018	-9e-05	8e-05	-7e-05
27.12	4e-05	-0.00015	8e-05	7e-05
27.36	0.0001	0.00028	-7e-05	6e-05
27.6	7e-05	4e-05	-0.00018	-7e-05
27.84	0.00023	0.00011	-0.00016	-2e-05
28.08	-4e-05	0.00024	0.00018	4e-05
28.32	-6e-05	-0.00013	0.00019	0
28.56	0.0001	6e-05	0.00018	-0.00011
28.8	1e-05	-0.00013	2e-05	-0.00022
29.04	0.00015	2e-05	-0.0001	2e-05
29.28	-7e-05	5e-05	4e-05	-3e-05
29.52	0.00013	-7e-05	6e-05	-7e-05
29.76	0.00016	-3e-05	-0.00013	7e-05
30	2e-05	-0.0002	8e-05	0.00028
30.24	0.00028	0.00032	0.00022	-3e-05
30.48	0.00027	1e-05	0.00023	0.00018
30.72	-0.0055	-0.00609	-0.00592	-0.00613
30.96	-0.03241	-0.03462	-0.03358	-0.03532
31.2	0.0093	0.01175	0.01233	0.01354
31.44	-0.01049	-0.01159	-0.01093	-0.01146
31.68	0.00019	0.00036	0.00044	8e-05
31.92	1e-05	0.00022	0.0001	8e-05
32.16	-4e-05	0.00017	0.0001	3e-05
32.4	-0.00014	7e-05	0.00011	0.00018
32.64	6e-05	0.00016	-4e-05	-7e-05
32.88	8e-05	0.00012	0.00013	-5e-05
33.12	-3e-05	0.0001	0.00012	-7e-05
33.36	-9e-05	6e-05	0.00024	-0.0001
33.6	2e-05	0.00019	5e-05	5e-05
33.84	-0.00012	8e-05	0.00014	7e-05
34.08	-3e-05	-3e-05	8e-05	-0.00015
34.32	-0.00017	0.00016	0.00024	-5e-05
34.56	-1e-05	0.00023	0.00034	-7e-05
34.8	3e-05	0.0002	0.0002	-6e-05
35.04	8e-05	0.00024	-9e-05	3e-05
35.28	0.00011	9e-05	0.00013	-0.00023
35.52	-0.00011	-0.0001	5e-05	3e-05
35.76	-2e-05	0.00012	0	-4e-05
36	5e-05	9e-05	1e-05	-8e-05
36.24	0.00012	9e-05	-1e-05	0.00011
36.48	0.00011	0.00021	0.00023	0.0002
36.72	0.00019	0.00025	0.00019	-0.00027
36.96	2e-05	0.00015	0.00011	-0.00012
37.2	-5e-05	0.00013	9e-05	1e-05
37.44	-5e-05	0.00024	-7e-05	-0.00022
37.68	-0.0001	0.00019	0.00011	-1e-05
37.92	4e-05	0.00013	0.00015	-6e-05
38.16	-3e-05	0.00016	0.00012	-1e-05
38.4	0.00011	0.00017	-1e-05	0.00011
38.64	-6e-05	0.00017	0.00017	0.0001
38.88	0.00015	0.00033	4e-05	-4e-05
39.12	7e-05	0.00015	-3e-05	-9e-05
39.36	0.00013	0.00022	5e-05	9e-05
39.6	-0.00013	0.00019	-1e-05	-0.00022
39.84	0.00012	0.00025	-5e-05	-2e-05
40.08	-4e-05	0.00016	-0.00016	8e-05
40.32	7e-05	0.00012	8e-05	4e-05
40.56	-1e-05	-0.0001	8e-05	7e-05
40.8	-0.00014	0.00017	2e-05	5e-05
41.04	-4e-05	-0.00011	5e-05	-6e-05
41.28	-0.00014	0.0001	-1e-05	-0.00018
41.52	4e-05	0.00018	5e-05	-0.00013
41.76	-3e-05	0.00012	8e-05	8e-05
42	0.00016	0.00015	-4e-05	-0.00018
42.24	0.00013	0.00022	0.0002	-6e-05
42.48	0.00013	0.00019	0.00019	-2e-05
42.72	9e-05	-0.00013	0.00019	0.00011
42.96	0.0001	0.00016	0.00018	-8e-05
43.2	-4e-05	6e-05	0.00037	-0.00011
43.44	0.0001	0.00018	0.00021	-0.00029
43.68	-1e-05	0.0003	-6e-05	7e-05
43.92	0.00017	0.00021	0.00013	5e-05
44.16	-3e-05	0.00014	3e-05	-0.00019
44.4	0.00013	7e-05	-7e-05	3e-05
44.64	6e-05	-1e-05	0.00016	1e-05
44.88	-7e-05	0.00013	0.00019	-0.00014
45.12	0.0001	-1e-05	0.00019	-0.00019
45.36	-1e-05	0.00031	6e-05	0.00011
45.6	0.00014	0.00025	-0.00014	-2e-05
45.84	-8e-05	0.00027	7e-05	-0.00019
46.08	8e-05	2e-05	9e-05	-0.00015
46.32	-8e-05	0.00011	-0.0001	0.00014
46.56	0.00023	0.00012	0.00038	3e-05
46.8	0.00018	8e-05	0.00012	-0.00011
47.04	-4e-05	9e-05	0.00026	-0.00014
47.28	0.00016	0.00025	0.00019	-0.00032
47.52	0.0001	0.00016	-0.00013	-7e-05
47.76	0.00026	0.00013	-0.00014	-6e-05
48	1e-05	0.0003	0.0001	-2e-05
48.24	8e-05	9e-05	0.00012	-0.00015
48.48	-6e-05	4e-05	0.00016	3e-05
48.72	7e-05	-4e-05	0.00011	-7e-05
48.96	0.00027	0.00023	-5e-05	-2e-05
49.2	0.00017	0.00023	8e-05	-5e-05
49.44	0.0001	3e-05	0.00029	-2e-05
49.68	-1e-05	0.00018	0.00012	-0.00011
49.92	0.00011	0.00015	-0.0001	-0.00027
50.16	-3e-05	4e-05	0.00013	-7e-05
50.4	-5e-05	0.00012	0.00019	-0.00017
50.64	2e-05	0.00016	-0.00013	0.00017
50.88	5e-05	-2e-05	7e-05	-0.00012
51.12	-0.00013	0.00021	-0.00012	-8e-05
51.36	0.0001	0.00012	-8e-05	9e-05
51.6	3e-05	-2e-05	2e-05	-5e-05
51.84	0.00021	8e-05	0.0001	0.00016
52.08	5e-05	0.00013	0.00017	-0.00025
52.32	-0.00013	0.0001	8e-05	-0.00017
52.56	-2e-05	0.00025	0.00035	-0.00015
52.8	8e-05	7e-05	4e-05	-0.00011
53.04	-9e-05	0.00033	0.00021	-0.00022
53.28	0.00016	0.00044	-0.0001	-5e-05
53.52	-9e-05	0.00018	-0.00019	-3e-05
53.76	3e-05	8e-05	-3e-05	-0.00015
54	-0.00036	5e-05	-7e-05	-0.00016
54.24	0.00019	0.00014	6e-05	-0.00019
54.48	0.00018	0.00023	0.00019	-0.00024
54.72	-7e-05	0.00021	0.0002	-0.00013
54.96	2e-05	9e-05	-3e-05	-0.00022
55.2	-2e-05	0.00025	0.00027	0.00015
55.44	-0.00018	0.00023	-9e-05	-1e-05
55.68	0.00013	0.00024	0.00026	-4e-05
55.92	-2e-05	0.00022	-2e-05	-3e-05
56.16	0.0001	-4e-05	4e-05	-9e-05
56.4	0.00033	0.00022	0.00025	-0.00024
56.64	5e-05	0	-0.00019	4e-05
56.88	0.00018	0.00038	-6e-05	-0.00012
57.12	0.00015	4e-05	0.00022	-0.00023
57.36	1e-05	0.00034	0.00012	-0.00028
57.6	7e-05	6e-05	-3e-05	8e-05
57.84	3e-05	0.00014	8e-05	-0.00032
58.08	1e-05	0.00013	0.00013	-5e-05
58.32	-3e-05	-2e-05	0.0001	-6e-05
58.56	0	-1e-05	7e-05	-0.0001
58.8	0.00017	0.00015	-8e-05	-7e-05
59.04	-6e-05	0.00017	0.00013	-9e-05
59.28	-0.00011	0.00014	8e-05	-0.00011
59.52	0.00016	6e-05	9e-05	-0.00015
59.76	-0.00021	-0.00012	0.00018	-0.00016
60	-3e-05	0.00041	0.00014	-0.00015
60.24	1e-05	3e-05	-0.00026	-6e-05
60.48	0.00024	0.00026	0.00012	-0.0002
60.72	9e-05	3e-05	3e-05	-0.00024
60.96	2e-05	0.00011	9e-05	-7e-05
61.2	1e-05	0.00011	0.00017	5e-05
61.44	0.0002	-6e-05	0.00021	-0.00026
61.68	6e-05	9e-05	-9e-05	-0.00024
61.92	0.00015	-9e-05	0.00014	0
62.16	-6e-05	0.0001	5e-05	-0.00025
62.4	-0.0002	0.00023	4e-05	-0.00013
62.64	0.00015	-4e-05	0.00021	-0.00029
62.88	-0.00014	0.00036	0.00013	-0.0001
63.12	2e-05	0.00014	-0.00021	-0.00018
63.36	5e-05	6e-05	-9e-05	-1e-05
63.6	-5e-05	-0.00012	0	-0.00017
63.84	3e-05	0.00027	5e-05	-0.00019
64.08	-8e-05	2e-05	0.00014	0.00012
64.32	3e-05	0.00025	0.00014	-8e-05
64.56	0.00023	0.00015	6e-05	-0.00013
64.8	0.00029	-6e-05	-0.00012	-3e-05
65.04	-3e-05	0.00019	1e-05	-0.00011
65.28	0.00013	0.00018	5e-05	-6e-05
65.52	-3e-05	7e-05	0.00015	-0.00012
65.76	0.00019	-3e-05	-2e-05	-0.00026
66	0.00017	-0.00019	-0.00012	-0.00027
66.24	-0.00011	-1e-05	1e-05	9e-05
66.48	0.00015	0.00015	0.00017	1e-05
66.72	-2e-05	1e-05	-6e-05	-0.00014
66.96	-2e-05	6e-05	-0.00014	-0.00029
67.2	-1e-05	-1e-05	8e-05	-0.00017
67.44	5e-05	0.00011	-0.00015	-2e-05
67.68	0.00012	0.00016	7e-05	-0.00017
67.92	9e-05	-4e-05	4e-05	-0.0001
68.16	-0.00015	-3e-05	-0.00012	-0.00019
68.4	4e-05	-2e-05	-3e-05	-0.00019
68.64	0.00011	0.00026	2e-05	4e-05
68.88	0.0002	8e-05	0.00016	-0.00027
69.12	-1e-05	0.00023	-0.00019	-0.00029
69.36	0.00014	0.0002	0.00024	-0.00033
69.6	0.00019	0.00015	0.00028	-0.00017
69.84	0.00018	0.00021	9e-05	-4e-05
70.08	0.00017	-0.00018	0	-0.00012
70.32	9e-05	6e-05	-0.00027	-9e-05
70.56	-0.00011	0.00018	-0.0001	-9e-05
70.8	-5e-05	-0.00012	0.0002	-0.00028
71.04	5e-05	0.00016	-0.00017	3e-05
71.28	0.0002	0.0002	7e-05	-0.00021
71.52	0	-2e-05	-8e-05	-0.00038
71.76	-0.00025	0.0001	8e-05	-0.00049
72	-4e-05	9e-05	0.00018	-3e-05
72.24	-1e-05	4e-05	0.00016	-0.0003
72.48	2e-05	0.00023	3e-05	-0.00015
72.72	-0.00014	0.00041	-1e-05	4e-05
72.96	7e-05	0.00011	0.00019	-9e-05
73.2	2e-05	7e-05	0.00014	-0.00028
73.44	0.00015	-1e-05	1e-05	-0.00013
73.68	-3e-05	0.00012	-2e-05	-6e-05
73.92	-6e-05	-6e-05	0.00017	-0.0003
74.16	0.00014	0.00018	-0.00026	-0.00026
74.4	-0.00019	5e-05	0.00024	-9e-05
74.64	-4e-05	0.00026	0.00014	-0.00024
74.88	0	-7e-05	0.00018	-0.00011
75.12	0.00012	0.00017	-3e-05	-0.00019
75.36	0.00012	-8e-05	3e-05	-0.00013
75.6	6e-05	-1e-05	9e-05	-0.00012
75.84	3e-05	0.00012	0.00013	-0.00018
76.08	2e-05	3e-05	-0.00022	-0.0002
76.32	5e-05	-5e-05	0.00011	-0.00011
76.56	4e-05	8e-05	9e-05	-0.00036
76.8	6e-05	2e-05	-2e-05	1e-05
77.04	-0.00014	0.00021	-0.00011	-0.00024
77.28	3e-05	-1e-05	-1e-05	-0.00014
77.52	8e-05	-9e-05	-7e-05	-0.00028
77.76	2e-05	-0.00015	-7e-05	-0.00016
78	-0.00013	0.00024	-0.00018	-0.00028
78.24	0	4e-05	0.0002	-0.00014
78.48	0.0001	0	-8e-05	-5e-05
78.72	0.00015	4e-05	0.00023	-8e-05
78.96	0	0.00016	1e-05	-0.00024
79.2	0.00032	0	-0.00016	-0.00017
79.44	0.0002	0.00011	-2e-05	-0.00018
79.68	8e-05	0.00014	-0.00022	2e-05
79.92	4e-05	-0.00013	1e-05	-2e-05
80.16	2e-05	0.00012	5e-05	-0.00019
80.4	1e-05	8e-05	-0.00026	-0.00015
80.64	-0.00015	-0.00015	0.0001	-0.00026
80.88	7e-05	-0.00014	0.00012	-0.00023
81.12	0.00014	1e-05	2e-05	-0.00038
81.36	-1e-05	-6e-05	-0.00014	-0.00032
81.6	0.00023	-1e-05	-4e-05	-0.00032
81.84	-0.00016	-3e-05	-0.00017	-8e-05
82.08	2e-05	-9e-05	-0.00018	-0.00023
82.32	-5e-05	0.00015	0.00011	-0.00046
82.56	0.00013	0.00015	-3e-05	-0.00019
82.8	0.00016	-1e-05	-2e-05	-0.00022
83.04	-9e-05	0.00012	4e-05	-0.00018
83.28	0.00012	-9e-05	0.00011	-0.0002
83.52	3e-05	0.00023	-0.00024	-5e-05
83.76	0.0001	-1e-05	-0.00018	-0.00026
84	-0.00016	3e-05	4e-05	-1e-05
84.24	-2e-05	9e-05	1e-05	-0.00046
84.48	-1e-05	0.00024	-3e-05	-0.00036
84.72	0.00013	0.00011	0	-0.00026
84.96	2e-05	9e-05	-5e-05	-0.00019
85.2	0.00025	4e-05	-5e-05	-7e-05
85.44	0.00012	-0.00017	4e-05	-0.00036
85.68	3e-05	0.00012	-0.00011	-0.0003
85.92	0.00021	0.00015	3e-05	5e-05
86.16	0.00012	-0.0001	0.00022	-5e-05
86.4	0.0001	-0.0002	0.00016	-0.00025
86.64	0.00022	0.0002	0.00011	-0.00016
86.88	8e-05	0.00019	-3e-05	-0.00015
87.12	-0.00012	8e-05	-8e-05	-0.00032
87.36	0.00028	0.0001	0.00016	-0.00031
87.6	-2e-05	9e-05	8e-05	-0.00012
87.84	3e-05	-0.00018	-8e-05	-0.00041
88.08	-6e-05	2e-05	0.00015	-0.00032
88.32	0.00021	6e-05	-6e-05	-0.00024
88.56	0.00014	9e-05	-0.00015	-0.00019
88.8	6e-05	0.00013	6e-05	-0.00027
89.04	-3e-05	-0.00015	-4e-05	-5e-05
89.28	-9e-05	0.00018	0.00013	-0.00029
89.52	0.00031	-0.00028	-1e-05	-0.00021
89.76	0.00021	5e-05	-4e-05	-0.00016
90	-7e-05	-0.00011	-0.00016	-0.00029
90.24	-1e-05	7e-05	9e-05	-0.00027
90.48	0	0	0.00011	-0.0002
90.72	-4e-05	-1e-05	-0.00038	-0.00014
90.96	3e-05	-2e-05	0.0001	-0.00032
91.2	1e-05	-0.00011	1e-05	-7e-05
91.44	7e-05	-5e-05	-7e-05	-0.0002
91.68	-0.00014	0.00012	-0.00015	-0.00042
91.92	0.00019	-4e-05	8e-05	-0.00031
92.16	0.00011	-1e-05	3e-05	-0.00028
92.4	0.00015	0.00023	-4e-05	-0.00014
92.64	0.00017	-0.00015	-0.00013	-0.00014
92.88	-4e-05	-2e-05	2e-05	2e-05
93.12	-1e-05	-4e-05	3e-05	-0.00015
93.36	4e-05	9e-05	-0.00021	-0.00028
93.6	0.00031	0.00018	1e-05	-0.00022
93.84	-3e-05	4e-05	2e-05	-0.00031
94.08	-0.00012	-0.00017	-0.00014	-0.0004
94.32	1e-05	0.00027	8e-05	-0.0003
94.56	-0.00031	0.0001	1e-05	-0.00026
94.8	-0.00022	-0.00016	0.00024	-0.0003
95.04	3e-05	0	-0.00015	-0.00036
95.28	4e-05	0.00015	2e-05	-0.00021
95.52	0.00013	-7e-05	-4e-05	-0.00051
95.76	-5e-05	-0.00017	-9e-05	-0.00033
96	-9e-05	0.00012	2e-05	-0.00031
96.24	4e-05	-0.00019	-0.00015	-0.00016
96.48	-8e-05	0.0001	3e-05	-0.00034
96.72	0	0.00015	0.00012	-0.00034
96.96	6e-05	0.00013	-0.00011	-0.00035
97.2	0.00014	0.00011	9e-05	-0.00028
97.44	8e-05	-1e-05	0.00021	-0.00048
97.68	-0.0001	3e-05	-3e-05	-0.00025
97.92	-1e-05	7e-05	-0.00019	-0.00034
98.16	-0.0001	-0.00012	5e-05	-0.00025
98.4	0.00015	-0.00023	0.00019	-0.00018
98.64	5e-05	-0.00021	0.00014	-0.00057
98.88	-2e-05	-6e-05	9e-05	-0.00013
99.12	7e-05	-9e-05	-7e-05	-0.00021
99.36	-0.00013	7e-05	0.00015	-0.00029
99.6	0.00017	0.00022	-0.00018	-0.00041
99.84	9e-05	-5e-05	0.00028	-0.00019
100.08	-0.00015	-6e-05	5e-05	-0.00016
100.32	7e-05	-0.00011	8e-05	-0.00035
100.56	0	0.0002	1e-05	-0.00039
100.8	0.00015	8e-05	-0.00013	-0.00027
101.04	0.00017	-1e-05	-0.00018	-0.00032
101.28	0.00012	-0.00012	-3e-05	-0.00042
101.52	-7e-05	-6e-05	0.00031	-0.00028
101.76	4e-05	-2e-05	1e-05	-0.00012
102	4e-05	2e-05	-0.00012	-0.00044
102.24	7e-05	3e-05	-0.00013	-0.00042
102.48	9e-05	-7e-05	-0.00012	-0.00041
102.72	0.00024	-4e-05	-0.00015	-0.00032
102.96	7e-05	0.00018	-0.00014	-0.00045
103.2	0.00019	0.00011	0.00012	-0.00024
103.44	-4e-05	-8e-05	0.00011	-0.0003
103.68	-0.00015	-9e-05	-0.00011	-0.0004
103.92	-7e-05	9e-05	-0.00014	-0.00027
104.16	0.0003	2e-05	8e-05	-0.00027
104.4	0.0001	-2e-05	-1e-05	-0.00026
104.64	-0.00012	-0.00016	-9e-05	-0.00038
104.88	8e-05	6e-05	9e-05	-0.00018
105.12	0	-6e-05	-9e-05	-0.00031
105.36	0.00012	-0.00014	0.00014	-0.00024
105.6	2e-05	0.00021	0.00013	-0.00014
105.84	1e-05	7e-05	4e-05	-0.00031
106.08	0	1e-05	0.00012	-9e-05
106.32	7e-05	8e-05	-0.00016	-0.0002
106.56	0.0001	-0.0001	-0.0001	-0.00026
106.8	2e-05	2e-05	0.00019	-0.00025
107.04	-0.0001	2e-05	-6e-05	-0.00035
107.28	5e-05	9e-05	0.00013	-0.00027
107.52	0.00015	5e-05	5e-05	-0.00033
107.76	-0.00024	0.0001	6e-05	-4e-05
108	-0.00012	-8e-05	6e-05	-0.00033
108.24	-0.00011	-0.00014	0.00026	-0.00042
108.48	2e-05	-6e-05	8e-05	-0.00034
108.72	-9e-05	-0.00032	-0.00025	-0.00043
108.96	7e-05	-6e-05	-0.00012	-0.00019
109.2	-4e-05	4e-05	1e-05	-3e-05
109.44	0.00012	5e-05	-0.00016	-0.00045
109.68	0.00017	-0.00026	-0.00014	-0.00024
109.92	8e-05	0.00019	0.00026	-0.0004
110.16	-0.00021	3e-05	-0.0002	-0.00033
110.4	-0.00011	0.00022	4e-05	-0.00044
110.64	0.0002	-0.00023	0.00016	-0.0005
110.88	8e-05	-0.00011	0.0001	-0.00033
111.12	-0.00013	0.00011	-8e-05	-0.00038
111.36	-0.00023	1e-05	5e-05	-0.00034
111.6	0.00017	9e-05	6e-05	-0.00024
111.84	-0.00026	-0.00021	-0.00012	-0.00032
112.08	-4e-05	-0.00021	8e-05	-0.00032
112.32	-2e-05	-2e-05	-0.00019	-0.00032
112.56	0.0002	-0.00012	-0.0001	-0.00055
112.8	-0.00013	5e-05	-6e-05	-0.00036
113.04	-0.00022	-0.00016	7e-05	-0.00038
113.28	-0.0001	-0.00026	-3e-05	-0.00039
113.52	0.00011	0.00011	-0.00018	-6e-05
113.76	-0.00011	6e-05	-0.00028	-0.00029
114	-0.00023	-9e-05	-6e-05	-0.00028
114.24	0.00011	-0.00019	-2e-05	-0.00046
114.48	-6e-05	-8e-05	-0.00014	-0.00037
114.72	0.0003	-0.00015	-0.00012	-0.00036
114.96	5e-05	2e-05	2e-05	-0.00031
115.2	-4e-05	-0.00016	-0.0002	-0.00038
115.44	1e-05	-7e-05	-0.00026	-0.00038
115.68	3e-05	-3e-05	0.00022	-0.00036
115.92	0.00019	0.00015	0.0001	-0.00028
116.16	0.00023	1e-05	-7e-05	-0.00029
116.4	-0.00018	-0.00022	3e-05	-0.0004
116.64	-2e-05	-9e-05	-0.00013	-0.00025
116.88	9e-05	0.0002	-0.00021	-0.0003
117.12	-4e-05	2e-05	-0.00028	-0.00021
117.36	-0.00021	-5e-05	1e-05	-0.00024
117.6	0	0.00014	6e-05	-0.00037
117.84	7e-05	-3e-05	-0.00025	-0.00059
118.08	6e-05	-0.00034	-0.0001	-0.00046
118.32	0.0001	-6e-05	-0.00032	-0.00028
118.56	-0.00011	0.00018	3e-05	-0.00035
118.8	-0.00011	-2e-05	2e-05	-0.00037
119.04	-9e-05	2e-05	7e-05	-0.00044
119.28	-1e-05	-8e-05	-2e-05	-0.00013
119.52	-0.00016	-0.00017	2e-05	-0.00028
119.76	-8e-05	-0.00026	8e-05	-0.00026
120	-0.00014	8e-05	0.00035	-0.00034
120.24	-4e-05	-6e-05	0.00023	-0.00026
120.48	0.00011	-1e-05	0.0001	-0.00033
120.72	-0.00023	7e-05	-0.00016	-0.00039
120.96	4e-05	-4e-05	0.00022	-0.00031
121.2	0.00014	9e-05	-4e-05	-0.00025
121.44	3e-05	-6e-05	0.00015	-0.00029
121.68	-0.00028	-0.00029	-0.00025	-0.00038
121.92	0.00014	-3e-05	-0.00021	-0.00016
122.16	-0.00034	1e-05	-9e-05	-0.00013
122.4	-0.0001	-0.00032	-0.00038	-0.00019
122.64	-7e-05	0	-0.00011	-0.00031
122.88	0.00016	-0.00019	-0.00022	-0.00044
123.12	0.00022	-0.0001	-0.00021	-0.0003
123.36	0.0002	-0.00028	9e-05	-0.00051
123.6	1e-05	-4e-05	-3e-05	-0.00038
123.84	3e-05	6e-05	0.00025	-0.00037
124.08	-0.00013	-4e-05	8e-05	-0.00059
124.32	8e-05	-7e-05	-6e-05	-0.00045
124.56	-9e-05	-0.00045	-0.00012	-0.00026
124.8	0.00015	-0.0001	-1e-05	-0.0005
125.04	0.00017	-0.00018	-0.00018	-0.0004
125.28	6e-05	-8e-05	0.00014	-0.00014
125.52	-9e-05	0	-1e-05	-0.00018
125.76	-0.00011	7e-05	-0.0002	-0.00054
126	-0.00011	-0.0001	-2e-05	-0.0003
126.24	-5e-05	-9e-05	-0.00036	-0.00054
126.48	-0.00022	-2e-05	-0.0003	-0.00046
126.72	-2e-05	0.0001	-0.00023	-0.00027
126.96	-0.00018	-0.00015	-7e-05	-0.00049
127.2	0.00012	-8e-05	6e-05	-0.00031
127.44	0	-0.00017	-0.00013	-0.00059
127.68	-1e-05	5e-05	-0.00016	-0.00045
127.92	1e-05	-7e-05	-0.00024	-0.00054
128.16	-0.00022	-0.00012	6e-05	-0.0004
128.4	-0.00014	-0.00015	2e-05	-0.00031
128.64	0.00022	-0.00022	-7e-05	-0.00044
128.88	-0.00012	0	-0.00019	-0.0005
129.12	-0.00011	-3e-05	-0.0001	-0.00034
129.36	1e-05	5e-05	2e-05	-0.00027
129.6	0	-0.00021	-2e-05	-0.00022
129.84	-0.00026	-0.00011	-7e-05	-0.00044
130.08	-8e-05	-8e-05	8e-05	-0.00031
130.32	1e-05	6e-05	6e-05	-0.00027
130.56	9e-05	-0.00019	-0.00033	-0.00028
130.8	-8e-05	0.00013	0	-0.00033
131.04	-0.00022	-8e-05	-1e-05	-0.00038
131.28	9e-05	0.00012	6e-05	-0.00043
131.52	3e-05	0	9e-05	-0.00036
131.76	-3e-05	6e-05	-7e-05	-0.00035
132	-0.0001	-8e-05	-7e-05	-0.00045
132.24	7e-05	0	-0.00022	-0.00034
132.48	7e-05	-5e-05	-0.00017	-0.00025
132.72	0.00039	-0.00021	-0.00014	-0.00034
132.96	-3e-05	-0.00026	0	-0.00042
133.2	0.00018	1e-05	-0.0001	-0.00033
133.44	0	2e-05	-0.00015	-0.00039
133.68	3e-05	0.00015	0.0004	-0.0006
133.92	5e-05	-0.00017	-3e-05	-0.00081
134.16	-5e-05	-6e-05	-0.0001	-0.00063
134.4	3e-05	-7e-05	0.00015	-0.0002
134.64	0	7e-05	-6e-05	-0.00042
134.88	-0.0001	-0.00015	4e-05	-0.00027
135.12	0.0002	-0.00023	3e-05	-0.00058
135.36	5e-05	-0.0001	-0.0001	-0.00062
135.6	0.00025	-0.0004	0.00016	-0.00048
135.84	-0.00014	-0.00017	-0.00028	-0.00041
136.08	-0.0001	-0.00016	4e-05	-0.00044
136.32	0.00016	9e-05	-0.00034	-0.00049
136.56	-4e-05	-0.00017	8e-05	-0.00026
136.8	4e-05	-0.00016	-0.00025	-0.0004
137.04	-6e-05	-0.00021	-0.00013	-0.00062
137.28	2e-05	-0.00012	-0.00047	-0.00045
137.52	4e-05	-0.00023	-0.00022	-0.00046
137.76	4e-05	-6e-05	-9e-05	-0.00048
138	5e-05	-0.00027	-7e-05	-0.00044
138.24	-6e-05	6e-05	-3e-05	-0.00054
138.48	0.00017	-8e-05	8e-05	-0.00025
138.72	0.00011	-0.00019	0.00014	-0.00053
138.96	-0.00014	4e-05	-0.00019	-0.00041
139.2	0.00022	-0.00022	-0.00027	-0.00045
139.44	5e-05	-0.0002	-0.00027	-0.0004
139.68	-0.00015	-0.00015	-0.00014	-0.00028
139.92	0.00017	-2e-05	-0.00028	-0.0005
140.16	-8e-05	3e-05	-0.00031	-0.00022
140.4	1e-05	-0.00011	0.00018	-0.00059
140.64	-3e-05	2e-05	-0.0001	-0.00035
140.88	-2e-05	-9e-05	0	-0.00055
141.12	9e-05	-0.00028	5e-05	-0.00053
141.36	-0.00016	9e-05	-0.00048	-0.00042
141.6	-4e-05	-0.00024	-9e-05	-0.00041
141.84	0.00021	1e-05	0.00013	-0.00052
142.08	-8e-05	4e-05	6e-05	-0.0003
142.32	8e-05	-0.00028	-0.00024	-0.00049
142.56	0	-5e-05	-0.00027	-0.00057
142.8	-1e-05	-0.00012	-0.00047	-0.00058
143.04	-0.00011	7e-05	-0.0001	-0.00067
143.28	-0.00045	-0.00014	-0.00014	-0.00057
143.52	4e-05	-7e-05	-0.00025	-0.00059
143.76	-9e-05	-5e-05	-0.00042	-0.00037
144	0.00026	-9e-05	-9e-05	-0.00043
144.24	0.00017	-0.00014	-3e-05	-0.00059
144.48	0.00024	-1e-05	4e-05	-0.00046
144.72	3e-05	-0.00021	-2e-05	-0.00034
144.96	5e-05	-0.00018	-0.00016	-0.00034
145.2	-9e-05	-8e-05	-0.00015	-0.00055
145.44	-2e-05	-0.00032	-0.00018	-0.00048
145.68	0.00012	-0.00018	9e-05	-0.00054
145.92	4e-05	-0.00023	-0.00028	-0.00045
146.16	0.00012	-0.00023	-1e-05	-0.00061
146.4	8e-05	-0.0003	0.00039	-0.00055
146.64	0.00017	-0.00032	-0.00018	-0.00048
146.88	-3e-05	1e-05	0	-0.0002
147.12	-8e-05	-0.00039	-0.00011	-0.00043
147.36	-2e-05	-0.00025	2e-05	-0.00071
147.6	-5e-05	-0.00022	-0.00014	-0.00062
147.84	5e-05	-0.00024	-4e-05	-0.00054
148.08	0.00024	-0.00018	-0.00019	-0.00057
148.32	0.00026	-0.00021	-0.00014	-0.00021
148.56	-0.00036	-2e-05	-4e-05	-0.00029
148.8	-0.0001	-0.00015	-0.00012	-0.00057
149.04	-4e-05	-0.00015	-8e-05	-0.00072
149.28	-5e-05	-0.00047	0.0001	-0.00063
149.52	-9e-05	-6e-05	0.00018	-0.00057
149.76	7e-05	-0.00021	-0.0001	-0.00049
150	-6e-05	-0.00014	9e-05	-0.0002
150.24	0.00029	0.00011	-4e-05	-0.00014
150.48	0.00052	0.00022	0.00043	2e-05
150.72	-0.00602	-0.0064	-0.00667	-0.00691
150.96	-0.03197	-0.03409	-0.03323	-0.03504
151.2	0.01082	0.01273	0.01313	0.01435
151.44	-0.00996	-0.01122	-0.01082	-0.01134
151.68	0.00124	0.00112	0.00105	0.00053
151.92	0.00105	0.00086	0.00106	0.00063
152.16	0.00101	0.0009	0.00099	0.00075
152.4	0.00117	0.00111	0.00101	0.00087
152.64	0.00131	0.00116	0.0014	0.00109
152.88	0.00153	0.00116	0.00113	0.00115
153.12	0.00152	0.00131	0.00151	0.00123
153.36	0.00152	0.00141	0.00138	0.00112
153.6	0.00142	0.0012	0.00129	0.00134
153.84	0.00179	0.00135	0.00164	0.00152
154.08	0.00159	0.00142	0.00163	0.00118
154.32	0.00212	0.00175	0.00179	0.00169
154.56	0.00186	0.0019	0.00189	0.00146
154.8	0.00193	0.00177	0.00193	0.00173
155.04	0.00213	0.00182	0.00188	0.00171
155.28	0.00195	0.00187	0.00213	0.00154
155.52	0.00186	0.00187	0.00187	0.00177
155.76	0.00211	0.0018	0.00219	0.00215
156	0.00216	0.00193	0.00213	0.0018
156.24	0.00203	0.00204	0.00191	0.00221
156.48	0.0021	0.00244	0.00222	0.0021
156.72	0.00221	0.00219	0.00237	0.00227
156.96	0.00217	0.00207	0.00227	0.0024
157.2	0.00224	0.00232	0.00211	0.00227
157.44	0.00249	0.00243	0.00227	0.00243
157.68	0.0023	0.0024	0.00219	0.00221
157.92	0.00224	0.00256	0.00228	0.00221
158.16	0.00241	0.00223	0.00241	0.0023
158.4	0.00253	0.00227	0.00231	0.00278
158.64	0.00242	0.0025	0.00237	0.00251
158.88	0.00252	0.00216	0.00229	0.00258
159.12	0.00253	0.0024	0.0025	0.00249
159.36	0.00253	0.00245	0.00257	0.00247
159.6	0.00287	0.00249	0.00275	0.00255
159.84	0.00254	0.0028	0.00262	0.00268
160.08	0.00267	0.00281	0.00289	0.00269
160.32	0.0026	0.00264	0.00266	0.00288
160.56	0.00276	0.00241	0.00278	0.00272
160.8	0.0025	0.00282	0.00281	0.0029
161.04	0.00281	0.00244	0.00279	0.00283
161.28	0.00264	0.00264	0.00286	0.00283
161.52	0.00284	0.0028	0.00292	0.00289
161.76	0.00291	0.00277	0.00268	0.00287
162	0.00272	0.00264	0.00299	0.00266
162.24	0.00257	0.00268	0.00302	0.00275
162.48	0.00281	0.00276	0.00292	0.00297
162.72	0.00279	0.00264	0.00304	0.00314
162.96	0.00281	0.00273	0.00289	0.00293
163.2	0.00271	0.00294	0.00292	0.00275
163.44	0.00278	0.00297	0.00305	0.00305
163.68	0.00275	0.00263	0.00299	0.003
163.92	0.00281	0.00281	0.00308	0.00336
164.16	0.00303	0.00298	0.00311	0.0032
164.4	0.00271	0.00282	0.00299	0.00318
164.64	0.00321	0.00299	0.00311	0.00283
164.88	0.00294	0.00296	0.00326	0.00312
165.12	0.00293	0.00286	0.00306	0.00307
165.36	0.00317	0.00287	0.00312	0.00343
165.6	0.00284	0.00292	0.00318	0.00315
165.84	0.00306	0.00326	0.00287	0.00313
166.08	0.00321	0.00283	0.00322	0.00331
166.32	0.00322	0.00333	0.00324	0.00324
166.56	0.00314	0.00319	0.00329	0.00313
166.8	0.00324	0.00313	0.003	0.0031
167.04	0.00324	0.00311	0.00335	0.00324
167.28	0.0033	0.00312	0.00303	0.0031
167.52	0.00312	0.003	0.00329	0.00321
167.76	0.00319	0.00288	0.00363	0.00359
168	0.00314	0.00319	0.00321	0.00334
168.24	0.00292	0.00299	0.00325	0.00339
168.48	0.00314	0.00307	0.00321	0.00336
168.72	0.00298	0.00308	0.00346	0.0033
168.96	0.00317	0.0032	0.00331	0.0035
169.2	0.00279	0.00333	0.00322	0.00346
169.44	0.00319	0.0032	0.00332	0.00356
169.68	0.00325	0.00345	0.00346	0.0033
169.92	0.00311	0.00324	0.00348	0.0035
170.16	0.00347	0.00323	0.00334	0.00361
170.4	0.00316	0.00302	0.00338	0.00331
170.64	0.00327	0.00299	0.00343	0.00354
170.88	0.0036	0.00326	0.00321	0.0032
171.12	0.00331	0.00302	0.00339	0.00375
171.36	0.00342	0.0031	0.0034	0.00344
171.6	0.00334	0.00323	0.0039	0.00348
171.84	0.00339	0.00327	0.0035	0.00339
172.08	0.00345	0.00319	0.00385	0.00359
172.32	0.00343	0.00336	0.0036	0.00358
172.56	0.00332	0.0034	0.00339	0.0037
172.8	0.00338	0.00331	0.0035	0.00363
173.04	0.00316	0.00344	0.00352	0.00346
173.28	0.00346	0.00331	0.00342	0.00342
173.52	0.00358	0.00347	0.0037	0.00352
173.76	0.00316	0.00344	0.00357	0.0034
174	0.00379	0.0033	0.00357	0.00384
174.24	0.0033	0.00335	0.0035	0.00363
174.48	0.00373	0.00319	0.00343	0.00377
174.72	0.00334	0.00356	0.00386	0.00357
174.96	0.00351	0.00346	0.0039	0.0039
175.2	0.00333	0.00315	0.00343	0.00387
175.44	0.00347	0.00365	0.00356	0.00362
175.68	0.00365	0.00332	0.00385	0.00354
175.92	0.00355	0.0035	0.00376	0.00375
176.16	0.00341	0.00328	0.00353	0.00364
176.4	0.00339	0.00352	0.00402	0.00373
176.64	0.00352	0.00373	0.00387	0.0036
176.88	0.00364	0.00338	0.00385	0.00365
177.12	0.00366	0.00343	0.00384	0.00373
177.36	0.00336	0.00329	0.00399	0.00368
177.6	0.00377	0.00331	0.00356	0.00352
177.84	0.00356	0.00324	0.0035	0.00356
178.08	0.00344	0.00344	0.00397	0.00369
178.32	0.00378	0.00322	0.00366	0.00362
178.56	0.0037	0.00376	0.00381	0.00365
178.8	0.00373	0.00346	0.00401	0.0039
179.04	0.0032	0.00362	0.0038	0.00375
179.28	0.0036	0.00352	0.00391	0.00393
179.52	0.00363	0.00365	0.00373	0.00379
179.76	0.00365	0.00354	0.00415	0.00382
180	0.00356	0.00373	0.00372	0.00381
180.24	0.00343	0.00348	0.00372	0.00351
180.48	0.00348	0.0035	0.0038	0.00387
180.72	0.00384	0.00344	0.00408	0.00397
180.96	0.00356	0.00367	0.00407	0.00398
181.2	0.00357	0.00335	0.00385	0.00379
181.44	0.00358	0.00363	0.00405	0.00383
181.68	0.00402	0.00353	0.00372	0.00387
181.92	0.00364	0.00338	0.00381	0.00395
182.16	0.00373	0.0034	0.00401	0.00371
182.4	0.00386	0.00363	0.004	0.00376
182.64	0.00347	0.00367	0.00382	0.00363
182.88	0.00377	0.00358	0.00379	0.00401
183.12	0.00369	0.00352	0.00407	0.00382
183.36	0.00353	0.00356	0.00411	0.00403
183.6	0.00351	0.00359	0.00381	0.00372
183.84	0.00394	0.00348	0.00377	0.00379
184.08	0.00371	0.00352	0.00387	0.00368
184.32	0.0041	0.00358	0.00392	0.00373
184.56	0.00363	0.00359	0.00385	0.00373
184.8	0.00383	0.00353	0.00409	0.00377
185.04	0.00381	0.00369	0.00406	0.00374
185.28	0.00372	0.00346	0.00415	0.0037
185.52	0.00376	0.00367	0.00416	0.00397
185.76	0.00367	0.00386	0.00416	0.00415
186	0.00394	0.00368	0.00397	0.004
186.24	0.00382	0.00387	0.00395	0.00381
186.48	0.00387	0.00354	0.0041	0.00384
186.72	0.00363	0.00349	0.00407	0.00392
186.96	0.00395	0.00377	0.0042	0.0042
187.2	0.00355	0.0037	0.00442	0.00383
187.44	0.00386	0.00352	0.00405	0.00383
187.68	0.00391	0.00388	0.00368	0.00406
187.92	0.0035	0.00354	0.00405	0.00433
188.16	0.00385	0.00359	0.00402	0.00409
188.4	0.00384	0.00361	0.00424	0.004
188.64	0.00383	0.00372	0.00419	0.00419
188.88	0.00349	0.00353	0.00426	0.00391
189.12	0.00374	0.00372	0.0043	0.00417
189.36	0.00389	0.00369	0.00392	0.00392
189.6	0.0037	0.00357	0.00422	0.00406
189.84	0.00411	0.00375	0.00391	0.00393
190.08	0.00386	0.00355	0.0041	0.00382
190.32	0.00379	0.00368	0.00446	0.00389
190.56	0.00391	0.00386	0.00401	0.00423
190.8	0.0037	0.00383	0.00434	0.00383
191.04	0.00364	0.00356	0.00406	0.00421
191.28	0.00382	0.00378	0.00431	0.00379
191.52	0.00391	0.00399	0.00431	0.00406
191.76	0.00392	0.00368	0.00424	0.00375
192	0.0039	0.00372	0.00413	0.00386
192.24	0.0039	0.0038	0.00402	0.00392
192.48	0.0039	0.00368	0.00433	0.00387
192.72	0.00384	0.00384	0.00441	0.00407
192.96	0.00391	0.00401	0.00413	0.00401
193.2	0.00372	0.00365	0.00406	0.0041
193.44	0.00377	0.00363	0.00429	0.004
193.68	0.00372	0.00364	0.00424	0.00409
193.92	0.00394	0.00377	0.00444	0.00415
194.16	0.00372	0.0036	0.00401	0.00394
194.4	0.00376	0.00382	0.00445	0.00391
194.64	0.00396	0.00374	0.0041	0.0039
194.88	0.00395	0.00353	0.00416	0.00419
195.12	0.00388	0.00391	0.00408	0.00381
195.36	0.00398	0.00376	0.00437	0.00408
195.6	0.0036	0.00393	0.00421	0.00407
195.84	0.00392	0.00371	0.00404	0.00401
196.08	0.00392	0.00377	0.00446	0.00385
196.32	0.00388	0.00393	0.00442	0.00406
196.56	0.00399	0.00351	0.00447	0.00408
196.8	0.00379	0.00368	0.00449	0.00405
197.04	0.00372	0.00374	0.00418	0.00415
197.28	0.004	0.00394	0.00439	0.00379
197.52	0.00384	0.00382	0.00439	0.00386
197.76	0.00373	0.00398	0.00423	0.0042
198	0.00394	0.00398	0.00424	0.00417
198.24	0.00383	0.00364	0.00419	0.00423
198.48	0.00395	0.00369	0.00446	0.00385
198.72	0.00377	0.00379	0.00442	0.00408
198.96	0.00357	0.00359	0.00401	0.0039
199.2	0.00397	0.00371	0.00434	0.00391
199.44	0.00371	0.0037	0.00411	0.00405
199.68	0.00413	0.00398	0.00443	0.004
199.92	0.00375	0.00388	0.00406	0.004
200.16	0.00399	0.00369	0.00404	0.00413
200.4	0.00402	0.00395	0.00448	0.004
200.64	0.00374	0.0037	0.00423	0.00396
200.88	0.00381	0.00376	0.00426	0.00389
201.12	0.00398	0.00374	0.0043	0.00394
201.36	0.00375	0.00387	0.00443	0.0042
201.6	0.00382	0.00377	0.004	0.00386
201.84	0.00389	0.0038	0.00439	0.00389
202.08	0.0038	0.00399	0.00467	0.00424
202.32	0.00365	0.00359	0.00449	0.00403
202.56	0.00396	0.00361	0.00407	0.00389
202.8	0.00386	0.00402	0.00435	0.00399
203.04	0.00391	0.00375	0.00442	0.00401
203.28	0.00358	0.00379	0.00416	0.00419
203.52	0.00392	0.00383	0.00432	0.004
203.76	0.00385	0.00389	0.00424	0.0043
204	0.00399	0.00383	0.00436	0.00416
204.24	0.00381	0.00366	0.0041	0.00385
204.48	0.00378	0.00375	0.00411	0.00406
204.72	0.00398	0.00368	0.00422	0.00402
204.96	0.00422	0.00372	0.00461	0.00404
205.2	0.00379	0.00394	0.0043	0.00387
205.44	0.0039	0.00386	0.00445	0.00407
205.68	0.00392	0.00373	0.00441	0.00424
205.92	0.00413	0.00397	0.00428	0.0042
206.16	0.00398	0.00386	0.0045	0.00391
206.4	0.00374	0.00386	0.00435	0.00363
206.64	0.00385	0.00402	0.00443	0.00397
206.88	0.00373	0.00402	0.00413	0.00419
207.12	0.00387	0.0037	0.0044	0.00412
207.36	0.00375	0.00403	0.00484	0.00399
207.6	0.00408	0.00406	0.00469	0.00413
207.84	0.00386	0.00407	0.00426	0.00401
208.08	0.00397	0.00419	0.00449	0.00401
208.32	0.00376	0.0039	0.00457	0.0042
208.56	0.00432	0.00407	0.00461	0.00413
208.8	0.00406	0.00369	0.0041	0.00396
209.04	0.00388	0.00381	0.00448	0.0039
209.28	0.00418	0.00372	0.00447	0.00395
209.52	0.00377	0.00383	0.00441	0.00438
209.76	0.00361	0.00373	0.00434	0.00394
210	0.00374	0.00398	0.00434	0.0041
210.24	0.00392	0.00378	0.00472	0.00412
210.48	0.00385	0.00375	0.00453	0.00403
210.72	0.00385	0.00372	0.00431	0.00401
210.96	0.00403	0.00387	0.00437	0.00406
211.2	0.00392	0.00376	0.00428	0.00399
211.44	0.00403	0.00368	0.00455	0.00416
211.68	0.00402	0.0038	0.00455	0.00412
211.92	0.0038	0.00352	0.00449	0.00392
212.16	0.00374	0.00379	0.00435	0.0042
212.4	0.00355	0.00379	0.00446	0.0041
212.64	0.00401	0.00372	0.00425	0.00402
212.88	0.00412	0.00376	0.00469	0.00453
213.12	0.00384	0.00395	0.00451	0.00416
213.36	0.00376	0.00379	0.00442	0.00422
213.6	0.00365	0.0037	0.00452	0.00411
213.84	0.00399	0.00392	0.00454	0.00398
214.08	0.00381	0.00406	0.00463	0.0045
214.32	0.00386	0.00389	0.00434	0.00421
214.56	0.00362	0.00388	0.00443	0.00419
214.8	0.00377	0.00379	0.0044	0.0042
215.04	0.00406	0.00389	0.00472	0.00407
215.28	0.00361	0.00394	0.00459	0.00386
215.52	0.00368	0.00371	0.00419	0.00389
215.76	0.00388	0.00389	0.00463	0.00393
216	0.00384	0.00385	0.00423	0.0041
216.24	0.004	0.00401	0.00418	0.00393
216.48	0.00362	0.00376	0.00446	0.0041
216.72	0.00364	0.00363	0.00425	0.00403
216.96	0.00383	0.00389	0.00437	0.00429
217.2	0.00388	0.00364	0.00455	0.00405
217.44	0.00398	0.00374	0.0043	0.00399
217.68	0.00393	0.00386	0.00441	0.00404
217.92	0.00392	0.00384	0.00441	0.00417
218.16	0.00377	0.00403	0.0046	0.00392
218.4	0.00397	0.00348	0.00465	0.00424
218.64	0.00379	0.00376	0.0042	0.00415
218.88	0.0037	0.00395	0.00415	0.00419
219.12	0.00383	0.00405	0.00479	0.00387
219.36	0.00391	0.00372	0.00436	0.0043
219.6	0.00409	0.00383	0.00453	0.00384
219.84	0.00351	0.0038	0.00422	0.00415
220.08	0.00391	0.00362	0.00477	0.00408
220.32	0.00392	0.00363	0.00443	0.00409
220.56	0.0038	0.00399	0.00472	0.00409
220.8	0.00376	0.00391	0.00458	0.00404
221.04	0.00376	0.00387	0.00437	0.00397
221.28	0.00379	0.00383	0.0045	0.00442
221.52	0.00364	0.00408	0.00429	0.00387
221.76	0.00376	0.00387	0.00413	0.00429
222	0.00388	0.00367	0.00466	0.00399
222.24	0.00373	0.00387	0.00447	0.00418
222.48	0.00398	0.00396	0.00426	0.00402
222.72	0.0039	0.00371	0.00464	0.00403
222.96	0.00424	0.00358	0.00446	0.00426
223.2	0.00406	0.00367	0.0045	0.00417
223.44	0.00398	0.0041	0.00468	0.00411
223.68	0.00403	0.0039	0.00464	0.00397
223.92	0.00373	0.00395	0.00428	0.00389
224.16	0.00374	0.00407	0.00427	0.00396
224.4	0.00367	0.00381	0.00425	0.00381
224.64	0.00394	0.00396	0.00437	0.00393
224.88	0.00392	0.00397	0.00428	0.00427
225.12	0.00371	0.00392	0.00471	0.00413
225.36	0.00368	0.00372	0.00446	0.00394
225.6	0.00382	0.00389	0.00451	0.00378
225.84	0.00399	0.00363	0.00461	0.0038
226.08	0.00365	0.00375	0.00418	0.00392
226.32	0.00384	0.00379	0.00467	0.00391
226.56	0.00378	0.00358	0.00462	0.00396
226.8	0.00387	0.00387	0.0045	0.00397
227.04	0.00377	0.00382	0.00427	0.00388
227.28	0.0038	0.00365	0.00487	0.00402
227.52	0.00411	0.00396	0.00469	0.00405
227.76	0.00375	0.00388	0.00457	0.00408
228	0.00381	0.00384	0.00452	0.0039
228.24	0.00362	0.00389	0.00441	0.00407
228.48	0.00372	0.00398	0.0045	0.00394
228.72	0.00389	0.00377	0.00442	0.00405
228.96	0.0042	0.00384	0.00431	0.00407
229.2	0.00381	0.00394	0.00449	0.00401
229.44	0.00402	0.00404	0.00444	0.00405
229.68	0.00378	0.00367	0.00437	0.00352
229.92	0.00383	0.00369	0.00451	0.00391
230.16	0.00391	0.00378	0.0043	0.0043
230.4	0.00418	0.00366	0.00448	0.00401
230.64	0.00394	0.00395	0.00409	0.00418
230.88	0.00376	0.00411	0.00453	0.00431
231.12	0.00374	0.00401	0.0047	0.00385
231.36	0.00396	0.00364	0.00458	0.00391
231.6	0.0038	0.00376	0.00444	0.00421
231.84	0.00365	0.00352	0.0041	0.0041
232.08	0.00372	0.0035	0.00496	0.00418
232.32	0.00393	0.00386	0.00461	0.004
232.56	0.00383	0.00389	0.00409	0.00379
232.8	0.00395	0.00373	0.00439	0.00416
233.04	0.00364	0.00388	0.00477	0.00408
233.28	0.00379	0.00394	0.00425	0.00408
233.52	0.00367	0.00384	0.00434	0.00407
233.76	0.0037	0.00394	0.00433	0.00408
234	0.0039	0.00373	0.00432	0.00396
234.24	0.00369	0.00365	0.0043	0.00406
234.48	0.00392	0.00398	0.00444	0.00406
234.72	0.0038	0.0037	0.00443	0.00416
234.96	0.00381	0.0037	0.00455	0.0042
235.2	0.00373	0.00368	0.00459	0.00388
235.44	0.00349	0.00354	0.00458	0.00412
235.68	0.00376	0.00348	0.0048	0.00399
235.92	0.00371	0.00404	0.00447	0.00412
236.16	0.00383	0.0038	0.00449	0.00417
236.4	0.00365	0.00385	0.00465	0.00434
236.64	0.00371	0.00396	0.00463	0.00397
236.88	0.00348	0.00388	0.00457	0.00382
237.12	0.00355	0.00383	0.00441	0.00422
237.36	0.0037	0.00379	0.00463	0.00426
237.6	0.00347	0.00357	0.00451	0.00393
237.84	0.00384	0.00383	0.0044	0.00387
238.08	0.00394	0.00367	0.00463	0.00372
238.32	0.00366	0.00377	0.00429	0.00413
238.56	0.00382	0.00375	0.00449	0.0039
238.8	0.004	0.00374	0.00436	0.00394
239.04	0.0037	0.004	0.00452	0.0039
239.28	0.00368	0.00382	0.00439	0.00402
239.52	0.00377	0.00357	0.00457	0.00395
239.76	0.00371	0.00379	0.00443	0.00391

## Sheet: R12 GL
Time	Exp1	Exp2	Exp3	Exp4
0	5e-05	7e-05	7e-05	-0.00019
0.24	0.00012	1e-05	3e-05	-6e-05
0.48	-0.00016	-3e-05	-1e-05	0.00016
0.72	-3e-05	-4e-05	0.00012	-0.00014
0.96	-4e-05	1e-05	-4e-05	0.00018
1.2	-0.00013	-6e-05	4e-05	-3e-05
1.44	-6e-05	-0.00014	-0.0001	0.0001
1.68	-7e-05	0.00012	6e-05	0.00011
1.92	-5e-05	-6e-05	-0.0001	0.00015
2.16	-1e-05	9e-05	-7e-05	0.0001
2.4	-8e-05	0.00012	-1e-05	1e-05
2.64	-3e-05	0.00015	7e-05	0.00027
2.88	-5e-05	0.0001	-0.00012	4e-05
3.12	-6e-05	-3e-05	-0.0001	0
3.36	-0.00011	-0.0001	-2e-05	-6e-05
3.6	-1e-05	0.00014	-4e-05	1e-05
3.84	-2e-05	0.00016	3e-05	0
4.08	1e-05	-6e-05	0.00014	0.00013
4.32	-0.00016	0.00011	9e-05	-5e-05
4.56	-3e-05	-0.00011	2e-05	3e-05
4.8	0.00011	-0.00011	3e-05	-0.00013
5.04	-1e-05	-0.0001	0	9e-05
5.28	0	0	-5e-05	-0.00013
5.52	-3e-05	-0.00024	-2e-05	0.00019
5.76	-2e-05	6e-05	8e-05	5e-05
6	6e-05	0	6e-05	-0.00013
6.24	4e-05	5e-05	-9e-05	-3e-05
6.48	-3e-05	-0.00014	-3e-05	0.00014
6.72	-4e-05	3e-05	3e-05	0.00017
6.96	0.00011	-9e-05	1e-05	6e-05
7.2	-0.0001	-7e-05	4e-05	-1e-05
7.44	-0.00011	2e-05	5e-05	5e-05
7.68	0.00014	8e-05	8e-05	-0.0002
7.92	-4e-05	0.00012	-5e-05	-0.0001
8.16	4e-05	0.00014	-4e-05	2e-05
8.4	-9e-05	-0.00011	-1e-05	-8e-05
8.64	2e-05	2e-05	-2e-05	-0.00012
8.88	1e-05	-5e-05	3e-05	0.00015
9.12	-5e-05	1e-05	-5e-05	-8e-05
9.36	7e-05	0	3e-05	8e-05
9.6	-3e-05	0.00017	-3e-05	0.0001
9.84	-3e-05	4e-05	-8e-05	0
10.08	-6e-05	-9e-05	0.00011	-0.00025
10.32	5e-05	0.0001	8e-05	-2e-05
10.56	-9e-05	4e-05	0.00012	-0.00012
10.8	-7e-05	-1e-05	0.00011	-0.00023
11.04	0.00016	-0.00011	0	6e-05
11.28	2e-05	2e-05	9e-05	6e-05
11.52	-0.00011	9e-05	2e-05	3e-05
11.76	9e-05	0.00013	-0.00014	-2e-05
12	-8e-05	-8e-05	0	8e-05
12.24	-6e-05	-0.00013	0.0001	-3e-05
12.48	4e-05	0	-0.00013	-0.00012
12.72	-1e-05	-3e-05	-0.00018	2e-05
12.96	1e-05	-3e-05	1e-05	0.00018
13.2	1e-05	0.00018	-3e-05	-9e-05
13.44	-0.00017	7e-05	-8e-05	0.00013
13.68	7e-05	2e-05	0	-1e-05
13.92	0	3e-05	6e-05	9e-05
14.16	4e-05	-2e-05	-4e-05	-1e-05
14.4	-6e-05	4e-05	-1e-05	-1e-05
14.64	-7e-05	-3e-05	0.00014	-3e-05
14.88	-6e-05	6e-05	-6e-05	-1e-05
15.12	-5e-05	-0.0001	-0.0001	0.00017
15.36	-0.00016	5e-05	3e-05	0.00012
15.6	-3e-05	4e-05	0.00021	0.00017
15.84	7e-05	0.0001	-6e-05	2e-05
16.08	-2e-05	9e-05	0.00015	-2e-05
16.32	1e-05	3e-05	0.00016	0.0002
16.56	4e-05	-2e-05	0.0001	-0.00016
16.8	-4e-05	-6e-05	0	-5e-05
17.04	-7e-05	-6e-05	1e-05	0.00013
17.28	-5e-05	-1e-05	-0.00014	0.00018
17.52	-5e-05	-1e-05	0.00013	5e-05
17.76	0.00011	5e-05	0.0001	-1e-05
18	-4e-05	-5e-05	-2e-05	-0.00012
18.24	0.0001	-5e-05	1e-05	-2e-05
18.48	0.00011	-1e-05	-1e-05	4e-05
18.72	-1e-05	5e-05	-2e-05	-0.00012
18.96	-3e-05	0	-7e-05	1e-05
19.2	-1e-05	-1e-05	-0.0001	-0.00015
19.44	0.0001	5e-05	3e-05	-9e-05
19.68	-8e-05	-2e-05	6e-05	-0.00025
19.92	-3e-05	-7e-05	-0.0002	-6e-05
20.16	4e-05	1e-05	8e-05	-0.0001
20.4	0.00011	-8e-05	-0.00014	8e-05
20.64	-1e-05	7e-05	8e-05	8e-05
20.88	0.00012	1e-05	-0.00011	-0.00012
21.12	-1e-05	-0.00016	5e-05	-5e-05
21.36	-8e-05	-5e-05	-0.0001	7e-05
21.6	-2e-05	-2e-05	-3e-05	6e-05
21.84	-5e-05	-0.00019	-2e-05	-4e-05
22.08	-8e-05	0.00015	0	-1e-05
22.32	-6e-05	0.00013	-5e-05	-0.00022
22.56	-2e-05	0.00016	-8e-05	-5e-05
22.8	3e-05	-4e-05	7e-05	-2e-05
23.04	0.00011	-0.00014	-4e-05	-0.00011
23.28	0	-3e-05	9e-05	4e-05
23.52	4e-05	-4e-05	1e-05	0.00012
23.76	7e-05	-0.0001	0.00011	-5e-05
24	4e-05	5e-05	3e-05	-5e-05
24.24	7e-05	-0.00017	8e-05	-8e-05
24.48	0.00012	0.0001	-8e-05	-0.0001
24.72	7e-05	-6e-05	1e-05	2e-05
24.96	0.00015	-3e-05	-1e-05	4e-05
25.2	8e-05	-7e-05	-0.00017	-0.0001
25.44	6e-05	-5e-05	-5e-05	8e-05
25.68	0.00014	8e-05	1e-05	8e-05
25.92	0.00012	6e-05	-0.00012	9e-05
26.16	-7e-05	0.00011	1e-05	-2e-05
26.4	3e-05	-0.00011	-6e-05	-9e-05
26.64	2e-05	-0.00013	0	-1e-05
26.88	0.00019	6e-05	0.00015	9e-05
27.12	-8e-05	0.00012	-3e-05	-0.00012
27.36	7e-05	-4e-05	8e-05	-5e-05
27.6	-0.00017	0.00013	-4e-05	0.00013
27.84	-7e-05	-4e-05	-0.00014	-2e-05
28.08	0.00013	-1e-05	-1e-05	-3e-05
28.32	8e-05	-0.0001	3e-05	0.00024
28.56	0.00015	-4e-05	-0.00013	-0.00021
28.8	6e-05	-8e-05	8e-05	-0.00014
29.04	0.00014	-0.0001	3e-05	-0.00011
29.28	-5e-05	5e-05	-1e-05	-2e-05
29.52	0.00028	8e-05	0.00018	-0.0002
29.76	0.00013	-2e-05	3e-05	-0.00019
30	0.00021	0.00016	7e-05	7e-05
30.24	0.0003	0.00032	0.0002	9e-05
30.48	0.00024	0.00011	0.00024	0.00022
30.72	-0.0059	-0.00678	-0.00656	-0.00692
30.96	-0.03553	-0.03911	-0.03794	-0.03891
31.2	0.00829	0.01262	0.01082	0.01194
31.44	-0.01218	-0.01351	-0.01292	-0.01317
31.68	-8e-05	0.00027	0.00021	0.00035
31.92	-0.00013	-8e-05	-1e-05	1e-05
32.16	-8e-05	0.00013	0.00011	0.00034
32.4	-0.0002	0.00017	9e-05	6e-05
32.64	-0.0001	-6e-05	0.00024	0.00028
32.88	-0.00018	0.0002	0.00012	0.00048
33.12	-0.00012	7e-05	0	5e-05
33.36	-0.00015	8e-05	-9e-05	0.00021
33.6	-5e-05	0.00022	0.00012	0.00018
33.84	-4e-05	0.00012	7e-05	0.00013
34.08	-8e-05	6e-05	2e-05	0
34.32	-5e-05	0.00031	7e-05	0.00028
34.56	-6e-05	5e-05	-4e-05	0.00036
34.8	-0.00014	4e-05	9e-05	0.00024
35.04	-0.00012	-5e-05	-6e-05	-6e-05
35.28	-0.00013	0.00013	5e-05	0.00032
35.52	-1e-05	5e-05	-0.00014	0.0002
35.76	-4e-05	0.00029	2e-05	-8e-05
36	4e-05	-1e-05	-3e-05	-0.00018
36.24	-0.00018	0.00011	0.0001	0.00017
36.48	-0.0001	0.00014	-0.00013	0.00014
36.72	-0.00013	0.00012	-9e-05	6e-05
36.96	-0.0001	-1e-05	0.00012	0.00015
37.2	-2e-05	0.00012	0.0001	0.00033
37.44	-0.00017	0.00012	0.00012	5e-05
37.68	1e-05	7e-05	-2e-05	-2e-05
37.92	2e-05	2e-05	-0.0001	-5e-05
38.16	-0.00014	2e-05	-4e-05	-6e-05
38.4	3e-05	2e-05	-0.00016	0.00021
38.64	-5e-05	-8e-05	0	0.00035
38.88	-0.00025	-2e-05	2e-05	0.00023
39.12	-7e-05	5e-05	0.00016	-4e-05
39.36	-0.00012	0.00012	-8e-05	4e-05
39.6	-0.00014	9e-05	4e-05	-1e-05
39.84	-4e-05	3e-05	0	0.00017
40.08	-0.00014	-0.00019	-8e-05	0.00011
40.32	-0.0002	0.00011	-0.00016	0.00017
40.56	-0.0001	-2e-05	-6e-05	-7e-05
40.8	-7e-05	6e-05	-6e-05	8e-05
41.04	-0.00011	-0.00013	-8e-05	6e-05
41.28	-6e-05	4e-05	6e-05	-1e-05
41.52	-0.00014	0.00015	-1e-05	0.00027
41.76	-0.00015	0.0001	-0.00016	-0.00022
42	-6e-05	8e-05	-5e-05	-0.00024
42.24	-2e-05	0.00016	-1e-05	4e-05
42.48	-0.00013	0.00023	-6e-05	4e-05
42.72	-0.00014	2e-05	7e-05	-8e-05
42.96	-0.00014	0.00019	0.00015	-1e-05
43.2	0	-1e-05	-0.0001	-0.00011
43.44	-0.00017	7e-05	-1e-05	-1e-05
43.68	-3e-05	8e-05	-0.00012	-0.00013
43.92	-0.00014	0.0001	0.00011	-4e-05
44.16	-7e-05	0.0001	2e-05	0
44.4	-7e-05	-8e-05	-9e-05	0
44.64	-8e-05	-4e-05	-5e-05	-6e-05
44.88	-0.00019	2e-05	0.00018	-0.00016
45.12	-0.0001	-0.00011	-9e-05	9e-05
45.36	-9e-05	-5e-05	0.00012	-0.00011
45.6	-0.00017	6e-05	0.00011	0.00011
45.84	-0.00014	0.00032	-5e-05	0.0002
46.08	0	-3e-05	0	5e-05
46.32	-7e-05	-9e-05	2e-05	0.00019
46.56	-6e-05	8e-05	-6e-05	-5e-05
46.8	-0.00017	0.00011	6e-05	3e-05
47.04	-0.00021	-4e-05	0.00012	-1e-05
47.28	-0.00012	6e-05	0	0.00011
47.52	-0.00018	0.00015	-3e-05	-0.00023
47.76	-0.00019	5e-05	0	7e-05
48	-8e-05	6e-05	5e-05	6e-05
48.24	-0.00018	6e-05	-6e-05	1e-05
48.48	-0.00019	-1e-05	4e-05	0.00013
48.72	-0.00014	0.00016	2e-05	-7e-05
48.96	-0.00012	0.00014	-0.00014	-7e-05
49.2	0.0001	5e-05	-0.00017	-1e-05
49.44	-5e-05	-2e-05	-0.00016	0.00021
49.68	-7e-05	-0.00012	9e-05	-0.00017
49.92	-0.00014	-2e-05	-0.00016	-0.0001
50.16	-0.00023	2e-05	-5e-05	5e-05
50.4	-0.00017	0.00012	-7e-05	-9e-05
50.64	-0.00024	-2e-05	-8e-05	-0.00016
50.88	-8e-05	-1e-05	-0.00011	-6e-05
51.12	-9e-05	-1e-05	3e-05	-0.00011
51.36	-0.00021	5e-05	-9e-05	0.00019
51.6	-0.00016	-8e-05	3e-05	-3e-05
51.84	-5e-05	3e-05	-0.00017	-4e-05
52.08	-4e-05	0	-0.00012	1e-05
52.32	-0.00014	0.00013	-0.00016	-1e-05
52.56	-7e-05	-0.0001	0.00011	-6e-05
52.8	1e-05	-4e-05	-1e-05	-9e-05
53.04	-5e-05	-5e-05	-6e-05	0
53.28	-0.00015	-0.00014	3e-05	0.00025
53.52	-0.00024	-3e-05	-3e-05	0.00013
53.76	-1e-05	-2e-05	1e-05	5e-05
54	-0.00013	-0.00015	-6e-05	-9e-05
54.24	-0.00018	-0.00013	-8e-05	-8e-05
54.48	-4e-05	4e-05	-5e-05	0.00014
54.72	-0.00016	-1e-05	-4e-05	0.00014
54.96	-0.00018	-0.00026	-0.00012	5e-05
55.2	-0.0002	-8e-05	-0.0003	9e-05
55.44	-0.0001	-1e-05	1e-05	3e-05
55.68	-0.00016	-5e-05	-0.0002	0.00014
55.92	-0.00022	-5e-05	-0.00021	-0.00012
56.16	-0.00016	2e-05	-0.00023	-0.00025
56.4	-9e-05	4e-05	3e-05	-2e-05
56.64	-0.00015	2e-05	1e-05	-0.00012
56.88	-7e-05	-0.0001	-0.0001	0.00015
57.12	-0.00017	0.00013	-0.00012	0
57.36	-3e-05	4e-05	-0.00026	-9e-05
57.6	-9e-05	-1e-05	-0.00013	-2e-05
57.84	-0.00015	-5e-05	-0.00021	-0.00018
58.08	-0.00016	4e-05	-0.00015	0.00047
58.32	-0.00019	3e-05	-0.00016	-0.00013
58.56	0	-0.0001	-0.00017	-1e-05
58.8	-0.00017	-0.00013	-0.00023	-4e-05
59.04	-0.00027	3e-05	3e-05	-0.0001
59.28	-0.00017	-5e-05	-0.00011	9e-05
59.52	-0.00023	1e-05	-0.00025	9e-05
59.76	-0.00015	-6e-05	-9e-05	-3e-05
60	-9e-05	-2e-05	-0.00011	4e-05
60.24	-0.0001	3e-05	-0.00013	3e-05
60.48	-0.0001	-8e-05	-0.00013	0.00018
60.72	-0.00015	5e-05	-0.00016	-3e-05
60.96	-0.00014	-0.00013	-6e-05	-9e-05
61.2	-0.00027	2e-05	-0.00014	2e-05
61.44	-0.00016	-0.00014	-0.00023	0.00016
61.68	1e-05	-0.00015	-0.0001	-0.00019
61.92	-9e-05	0	-0.00024	-9e-05
62.16	-0.00024	-4e-05	-0.00012	-0.0003
62.4	-9e-05	-2e-05	-0.0003	1e-05
62.64	-0.00015	-7e-05	-0.00013	0.0001
62.88	1e-05	-6e-05	-0.00011	-3e-05
63.12	-0.00013	-4e-05	-4e-05	-0.00023
63.36	-0.00012	-4e-05	0	0.00012
63.6	-9e-05	-0.00021	3e-05	-7e-05
63.84	1e-05	-0.00025	-0.00032	-0.0001
64.08	-6e-05	-0.00018	-0.00021	0.00022
64.32	-9e-05	-0.00023	-0.00011	0.00016
64.56	1e-05	-0.00017	-0.00022	-0.00011
64.8	-2e-05	-0.00013	-0.0002	0.00014
65.04	-0.0001	-0.00021	-6e-05	6e-05
65.28	-0.00018	-2e-05	-0.00013	0.00023
65.52	-0.00015	5e-05	-8e-05	-0.00011
65.76	-0.00025	5e-05	-0.00022	-5e-05
66	-7e-05	-0.0002	-0.00026	-8e-05
66.24	-0.00015	0	-0.00012	-0.00014
66.48	-0.00011	6e-05	-0.00018	-4e-05
66.72	-0.00015	5e-05	-6e-05	0.00015
66.96	-6e-05	-0.00018	-0.00015	0.00017
67.2	-0.00015	-0.00011	-0.00025	-0.00018
67.44	-0.00016	-3e-05	-9e-05	-0.00015
67.68	-0.00026	1e-05	-0.00022	-0.00014
67.92	-0.00024	3e-05	-0.00029	-4e-05
68.16	-0.00017	-2e-05	-0.00013	-3e-05
68.4	-0.00026	-0.00018	-0.00019	0.00018
68.64	-0.00015	0	-0.00034	5e-05
68.88	-0.00015	-5e-05	-0.0002	-0.0001
69.12	-1e-05	5e-05	-0.00014	3e-05
69.36	-8e-05	-0.00023	-0.00014	-4e-05
69.6	-0.00014	-7e-05	-7e-05	-0.00018
69.84	-0.00022	-0.00013	4e-05	0.00014
70.08	-2e-05	-8e-05	-0.00023	0.00032
70.32	-7e-05	0	-0.00019	-5e-05
70.56	-5e-05	-0.0001	-4e-05	0
70.8	-6e-05	-0.00015	-0.00019	6e-05
71.04	-0.00023	-6e-05	-0.00014	4e-05
71.28	-0.00012	-0.00027	-0.00019	1e-05
71.52	-0.00016	-0.0001	-0.00026	-0.0001
71.76	-0.00016	-1e-05	-9e-05	-5e-05
72	-0.0001	-0.00014	-9e-05	-0.00027
72.24	-0.00028	-5e-05	-0.00016	-0.0001
72.48	-2e-05	-5e-05	5e-05	-1e-05
72.72	-0.00019	-7e-05	-0.00015	-2e-05
72.96	-6e-05	-0.0001	-0.00027	1e-05
73.2	-0.0001	-0.00014	-0.0002	3e-05
73.44	-0.0001	-8e-05	-0.00026	1e-05
73.68	-3e-05	2e-05	-0.00012	-1e-05
73.92	-0.00022	-0.00015	-0.0002	-0.00012
74.16	-0.00024	-5e-05	-6e-05	-0.00021
74.4	-0.00026	-0.00015	-0.00025	6e-05
74.64	-7e-05	-0.00015	-1e-05	-0.0002
74.88	-0.0002	-3e-05	-8e-05	-9e-05
75.12	-0.00025	-0.0002	-2e-05	-0.00012
75.36	-0.00014	-6e-05	-0.00012	-0.00019
75.6	-8e-05	-9e-05	-0.00013	-0.0001
75.84	-2e-05	-9e-05	-3e-05	-0.00012
76.08	-4e-05	-2e-05	-0.00018	-0.00015
76.32	-0.0003	-0.00039	-0.00011	-8e-05
76.56	-0.00019	-0.00011	-8e-05	-0.00032
76.8	-4e-05	-0.00019	-0.00011	-5e-05
77.04	-0.00014	-0.00013	-0.0003	8e-05
77.28	-2e-05	-0.00014	-0.0002	0.00021
77.52	-0.00014	-0.00018	-6e-05	0.00024
77.76	-0.00016	-9e-05	-0.00027	-7e-05
78	-0.00024	-7e-05	-0.00021	0
78.24	-0.0002	5e-05	-0.00021	-5e-05
78.48	-5e-05	-3e-05	-0.00019	3e-05
78.72	-7e-05	-0.00019	-0.0003	-0.00032
78.96	-0.00028	-0.00019	-0.00027	-0.00015
79.2	-0.0002	-2e-05	-0.0002	-0.00028
79.44	-0.00015	-0.00014	-0.00027	-0.00037
79.68	-0.00019	-7e-05	-0.00037	-0.00015
79.92	-9e-05	-0.00034	-0.00014	-8e-05
80.16	-9e-05	-6e-05	-0.00019	-1e-05
80.4	-0.00015	-0.0002	-0.00028	2e-05
80.64	-5e-05	-0.00012	-0.00025	7e-05
80.88	-9e-05	-0.00012	-9e-05	8e-05
81.12	-0.0001	-8e-05	-6e-05	5e-05
81.36	-8e-05	2e-05	-0.00014	-0.0002
81.6	-7e-05	-0.0001	-0.00015	1e-05
81.84	-1e-05	-5e-05	-0.00032	-4e-05
82.08	-9e-05	-0.00012	-0.00012	3e-05
82.32	-7e-05	-8e-05	-0.00011	5e-05
82.56	-0.00023	-0.00015	-0.00031	-5e-05
82.8	-0.00011	-5e-05	-0.00019	-0.00013
83.04	-0.00021	-0.00035	-0.00012	-0.00021
83.28	-0.00031	-0.0001	-0.00023	-0.00011
83.52	0	-0.00016	-0.00018	0.00011
83.76	-0.00025	-0.00018	-0.00012	-0.00014
84	-0.00019	-7e-05	-0.00014	-0.00013
84.24	-7e-05	-0.00019	-0.00021	-7e-05
84.48	-0.0002	-0.00028	-3e-05	-8e-05
84.72	-0.00012	-4e-05	-0.00026	-0.00011
84.96	-0.00016	-0.00014	-8e-05	5e-05
85.2	-0.00022	-8e-05	-0.00017	-0.00022
85.44	-0.00024	-3e-05	-0.00018	-0.0002
85.68	-0.00018	-0.00015	-0.00035	5e-05
85.92	-0.00018	-0.00018	-0.00029	-8e-05
86.16	-0.00019	-0.00025	-0.00015	-0.00019
86.4	-0.00023	-0.00027	-0.00016	-8e-05
86.64	-0.00011	-0.00022	-0.0002	-0.00032
86.88	-0.0001	-0.00022	-0.00014	-0.00015
87.12	-0.00011	-0.00019	-0.00024	-0.0002
87.36	-0.00021	-0.00022	5e-05	-8e-05
87.6	-0.00018	4e-05	-0.00026	-0.00041
87.84	-0.00026	-0.0001	-0.00034	-0.0002
88.08	-0.00015	-0.00024	-0.00032	-0.00013
88.32	1e-05	0	-5e-05	-0.00019
88.56	-0.00034	-0.00019	-0.00032	-0.00033
88.8	-0.00019	-0.00015	-0.00011	-8e-05
89.04	-0.00032	-0.00023	-0.00029	-0.00012
89.28	-0.00024	0	-0.00018	-4e-05
89.52	-0.00019	-0.00013	-0.0002	1e-05
89.76	-9e-05	-0.0001	-0.0001	-0.00024
90	-0.00017	-0.0003	-0.00025	-0.00018
90.24	-0.00013	-0.00011	-0.00021	-0.00045
90.48	-0.00019	-0.00025	-0.00044	-0.0004
90.72	-0.00024	-8e-05	-0.00027	-0.0003
90.96	-0.00012	-0.00031	-0.00016	-0.00027
91.2	-2e-05	-9e-05	-0.00027	-0.00026
91.44	-0.00012	-0.00031	-0.0003	-2e-05
91.68	-9e-05	-0.00024	-0.00017	4e-05
91.92	-0.00018	-0.00024	-0.00047	-8e-05
92.16	-0.00011	-0.00024	-0.00025	-0.00023
92.4	-3e-05	-0.00014	-0.00018	-2e-05
92.64	-0.00017	-0.00023	-0.00032	-0.00013
92.88	-0.00028	-0.00016	-0.00011	-0.00022
93.12	-5e-05	-1e-05	-0.00013	0
93.36	-0.00017	-0.00018	-0.00023	-0.00025
93.6	-9e-05	-0.00023	-0.00043	-0.00012
93.84	-6e-05	-0.00025	-0.00023	-6e-05
94.08	-8e-05	-0.00012	-0.00024	-0.00032
94.32	-0.00011	-0.00023	-0.00029	-5e-05
94.56	-8e-05	-0.00026	-0.00017	-0.00025
94.8	-0.00018	-0.00028	-0.00014	-0.0003
95.04	-0.00012	-5e-05	-0.00014	-0.00017
95.28	-9e-05	-0.00015	-0.00016	-0.00011
95.52	-0.0001	-0.00034	-0.00021	6e-05
95.76	-0.00018	-0.00014	-0.0001	7e-05
96	-0.00018	-0.00017	-0.00014	-7e-05
96.24	-0.0001	-0.00021	-0.00011	-4e-05
96.48	-0.00022	-0.00016	-0.00021	0.00013
96.72	-0.00021	-0.00023	-0.00029	-0.00021
96.96	-0.00025	-0.00029	-0.00035	-0.00014
97.2	-0.00013	-0.0002	-0.00018	-5e-05
97.44	-0.00021	-0.00027	-0.00021	-0.00013
97.68	-0.00011	-0.00041	-0.0002	-0.00028
97.92	-8e-05	-0.00022	-0.00029	6e-05
98.16	-0.00023	-0.00027	-0.00028	-2e-05
98.4	-0.00019	-5e-05	-0.0001	-0.00019
98.64	-0.00021	-0.0002	-0.00026	-0.00022
98.88	-0.00011	-0.0002	-0.0002	-0.00027
99.12	-0.00026	-0.00023	-0.00027	-3e-05
99.36	-0.00025	-0.00025	-0.0003	-8e-05
99.6	-0.00018	-0.00038	-0.00012	0
99.84	-0.00026	-0.0002	-0.0001	-0.00014
100.08	-7e-05	-0.00011	-0.00032	-0.00016
100.32	-7e-05	-0.00023	-0.00031	-0.00024
100.56	-0.00023	-0.00033	-0.00029	-0.00023
100.8	-0.00013	-9e-05	-0.0003	-0.00018
101.04	-0.00016	-0.00016	-6e-05	-0.00014
101.28	-0.00014	-0.00017	-0.00035	-0.00019
101.52	-0.00011	-0.00015	-0.00015	-0.0003
101.76	-0.00011	-0.0002	-0.00037	-6e-05
102	-0.00029	-0.0003	-0.00019	-5e-05
102.24	-0.00016	-0.00023	-0.00023	-0.00029
102.48	0	-0.00028	-0.00029	-0.00028
102.72	-0.00025	-0.00029	-0.00036	-0.0002
102.96	-0.00017	-5e-05	-0.0003	0.00014
103.2	-0.00022	-0.00035	-0.00025	0
103.44	-0.0002	-0.00021	-0.00016	-0.00037
103.68	-0.00017	-0.00011	-0.00021	-0.00012
103.92	-0.00015	-0.00032	-0.00044	-0.00016
104.16	-0.00013	-0.00031	-0.00018	-0.00037
104.4	-0.00016	-0.00027	-0.0003	-0.00048
104.64	-2e-05	-0.00033	-0.00034	-8e-05
104.88	-0.00021	-0.00023	-0.00036	-0.00024
105.12	-0.00017	-0.00013	-0.00027	-0.0002
105.36	-0.00022	-0.00018	-0.0003	-0.00028
105.6	-4e-05	-0.00011	-0.00026	-0.00018
105.84	-0.00023	-0.00029	-0.00039	-0.0003
106.08	-0.00019	-0.00034	-0.00031	-0.00022
106.32	-0.00019	-3e-05	-0.0002	-0.00013
106.56	-0.00018	-0.00016	-0.00036	-0.00024
106.8	-0.00021	-0.00028	-0.00038	-0.00046
107.04	-0.00014	-0.00019	-0.00036	-9e-05
107.28	-0.00017	-0.00029	-0.00018	-3e-05
107.52	-0.00014	-0.00033	-0.00025	-0.00016
107.76	-0.00025	-0.00022	-0.00029	-0.0003
108	-0.00016	-0.00028	-0.00027	-0.00018
108.24	-0.00016	-0.00024	-0.00032	-0.00018
108.48	-0.0002	-0.00036	-0.00028	-0.0001
108.72	-0.00017	-0.00042	-0.00015	-0.00027
108.96	-0.00024	-0.00018	-0.00019	-0.00051
109.2	-0.00018	-0.0002	-0.00018	-0.00018
109.44	-3e-05	-0.00032	-0.00025	-0.00031
109.68	-0.0001	-0.00023	-0.00014	-0.0003
109.92	-0.00032	-0.00023	-0.00027	-0.00026
110.16	-0.00019	-0.00033	-0.00048	4e-05
110.4	-0.0002	-0.0004	-0.00035	-0.00019
110.64	-0.00015	-0.0002	-0.00027	-0.00028
110.88	-0.00033	-0.00026	-0.0003	-0.00017
111.12	-0.00016	-0.0003	-0.0003	-0.00021
111.36	-0.00017	-0.00015	-0.00031	-0.00022
111.6	-0.00012	-0.00044	-0.00034	-0.0002
111.84	-0.0001	-0.00023	-0.00038	-7e-05
112.08	-0.0001	-0.00031	-0.00034	-0.00044
112.32	-0.00026	-0.00042	-0.00036	-0.0003
112.56	-0.00027	-0.00028	-0.0003	-0.0001
112.8	-0.00024	-5e-05	-0.00025	-0.00013
113.04	-0.0003	-0.00033	-0.00027	-0.00019
113.28	-0.00015	-0.00029	-0.00025	-0.00024
113.52	-6e-05	-0.00035	-0.0004	-0.00031
113.76	-0.00018	-0.00018	-0.00025	-4e-05
114	-0.00022	-0.00032	-0.00029	5e-05
114.24	-0.00014	-4e-05	-0.00013	-0.0002
114.48	-0.00015	-0.00015	-0.00043	-0.0001
114.72	-0.00026	-0.00018	-0.00026	-5e-05
114.96	-0.00029	-0.00026	-0.00045	-0.00028
115.2	-0.00027	-0.00034	-0.00029	-0.00016
115.44	-0.0001	-0.00028	-0.00017	-0.00013
115.68	-0.0003	-0.00022	-0.00032	-0.00023
115.92	-3e-05	-0.00052	-0.0004	-0.00018
116.16	-0.00016	-0.00021	-0.00044	-0.00018
116.4	-0.00018	-0.00014	-0.00025	-0.00018
116.64	-0.00015	-0.00038	-0.00044	-0.00011
116.88	-0.00016	-0.00015	-0.00036	0.00013
117.12	-0.00027	-0.00045	-0.00019	-0.00024
117.36	-0.00012	-0.00018	-0.00038	-0.00034
117.6	-0.00017	-0.00036	-0.0004	-0.00027
117.84	-0.00019	-0.00041	-0.00031	-0.00016
118.08	-0.00024	-0.00044	-0.00025	0.00013
118.32	-0.00012	-0.00033	-0.00029	-0.00028
118.56	-0.00033	-0.00022	-0.00013	-0.00022
118.8	-0.00015	-0.00043	-0.00034	-0.00026
119.04	-0.00019	-0.00028	-0.00026	-4e-05
119.28	-0.00013	-0.00031	-0.00036	-7e-05
119.52	-0.00013	-0.0003	-0.00031	-0.00019
119.76	-0.00015	-0.00035	-0.0003	-0.00026
120	-0.00038	-0.0004	-0.0004	-0.00013
120.24	-0.0001	-0.00033	-0.00026	-0.00032
120.48	-0.00014	-0.00043	-0.00037	-3e-05
120.72	-0.00028	-0.00013	-0.0005	-0.00013
120.96	-0.00031	-0.00026	-0.00023	-0.0001
121.2	-0.00021	-0.00029	-0.00042	-0.00015
121.44	-0.00037	-0.00033	-0.0005	-0.00022
121.68	-0.00021	-0.00029	-0.00022	-2e-05
121.92	-3e-05	-0.00024	-0.00048	-0.00031
122.16	-0.00026	-0.00032	-0.00028	-0.00033
122.4	-0.00019	-0.00032	-0.00018	-0.0003
122.64	0	-0.00041	-0.00024	-0.00017
122.88	-0.00011	-0.0003	-0.00036	-0.0001
123.12	-0.00025	-0.0004	-0.00047	-0.00027
123.36	-0.00028	-0.00032	-0.00045	-0.00035
123.6	-0.00023	-0.00024	-0.00032	-8e-05
123.84	-6e-05	-0.00031	-0.00034	-0.00038
124.08	-0.0003	-0.00018	-0.00031	-0.00031
124.32	-0.00013	-0.00038	-0.00031	-0.00012
124.56	-0.00029	-0.00034	-0.00037	-0.00013
124.8	-0.00023	-0.00015	-0.00034	-0.0001
125.04	4e-05	-0.00041	-0.00036	-0.00021
125.28	-0.0001	-0.00037	-0.00029	-0.00031
125.52	-0.00019	-0.0003	-0.00028	-4e-05
125.76	-0.00029	-0.00021	-0.00039	-0.0001
126	-0.00038	-0.00042	-0.00041	-0.00021
126.24	-0.00015	-0.00034	-0.00027	-0.00026
126.48	-0.00027	-0.00038	-0.00026	-0.00029
126.72	-0.00022	-0.00035	-0.0003	-0.00046
126.96	-0.00021	-0.0003	-0.0003	-0.00021
127.2	-0.00026	-0.00039	-0.00045	-0.00033
127.44	-0.00015	-0.00037	-0.00038	-7e-05
127.68	-0.00027	-0.00048	-0.00033	-0.00037
127.92	-0.00019	-0.0004	-0.00027	-0.00042
128.16	-0.00013	-0.00038	-0.00046	-0.00027
128.4	-0.00023	-0.00035	-0.00055	-0.00015
128.64	-0.00032	-0.00035	-0.00021	-0.00033
128.88	-0.00029	-0.00029	-0.00027	-0.00026
129.12	-0.00047	-0.00032	-0.00046	-0.0002
129.36	-0.00033	-0.00036	-0.00046	-0.00027
129.6	-0.00032	-0.00038	-0.00024	-0.00029
129.84	-0.00018	-0.00045	-0.00038	-0.00021
130.08	-0.00018	-0.00042	-0.00032	-0.00021
130.32	-0.00044	-0.00025	-0.0004	-0.00027
130.56	-0.00014	-0.00022	-0.00049	-0.00022
130.8	-0.00024	-0.00055	-0.00044	-0.00042
131.04	-0.00025	-0.00045	-0.00025	-0.00013
131.28	-0.00037	-0.00035	-0.00047	-6e-05
131.52	-0.00023	-0.00041	-0.00036	-0.00012
131.76	-0.00026	-0.00036	-0.00036	-0.00045
132	-0.00016	-0.00051	-0.00042	-0.00044
132.24	-0.00018	-0.00032	-0.00052	-0.0002
132.48	-0.00023	-0.00049	-0.00025	-0.00027
132.72	-0.00027	-0.00039	-0.0004	-0.00053
132.96	-0.00036	-0.00039	-0.00032	-0.00031
133.2	-0.00017	-0.00034	-0.00043	-0.00021
133.44	-0.00023	-0.00024	-0.00035	-0.00018
133.68	-0.00016	-0.00025	-0.00018	-0.0002
133.92	-0.00027	-0.00046	-0.00055	-0.00028
134.16	-0.00029	-0.00035	-0.00034	-0.00023
134.4	-0.00017	-0.00027	-0.00067	-0.00046
134.64	-0.00032	-0.00034	-0.0004	-0.00046
134.88	-0.00022	-0.00041	-0.00036	-0.00026
135.12	-0.0001	-0.00028	-0.0004	-0.00044
135.36	-0.00021	-0.00025	-0.00042	-0.00021
135.6	-0.00029	-0.00034	-0.0004	-0.00026
135.84	-0.00028	-0.00038	-0.00038	-0.00045
136.08	-0.00022	-0.00026	-0.00035	-0.00024
136.32	-0.00019	-0.00038	-0.00033	-0.00043
136.56	-0.00021	-0.00024	-0.00057	-9e-05
136.8	-0.00013	-0.00043	-0.00043	-0.00018
137.04	-0.00024	-0.00037	-0.00052	-0.00024
137.28	-0.00022	-0.00046	-0.00018	-0.0003
137.52	-0.00042	-0.00034	-0.00051	-0.00035
137.76	-0.0002	-0.00039	-0.00042	-0.00017
138	-0.00031	-0.00048	-0.00041	-0.00041
138.24	-0.00023	-0.00035	-0.00033	-0.00032
138.48	-0.00048	-0.00057	-0.0005	-0.00016
138.72	-0.00028	-0.00038	-0.00046	-0.00033
138.96	-0.00014	-0.00047	-0.00061	-0.00046
139.2	-0.00025	-0.00033	-0.00019	-0.00015
139.44	-0.00034	-0.00024	-0.00043	-0.00032
139.68	-0.0002	-0.00046	-0.00026	-0.00038
139.92	-0.00037	-0.00051	-0.00041	-0.00016
140.16	-0.00038	-0.00052	-0.00042	-0.00041
140.4	-0.00024	-0.00024	-0.00027	-0.00034
140.64	-0.00016	-0.0005	-0.00027	-0.00033
140.88	-0.00019	-0.00046	-0.00044	-0.00038
141.12	-0.00028	-0.0003	-0.00045	-0.00026
141.36	-0.0003	-0.00024	-0.00032	-0.00018
141.6	-0.00024	-0.00032	-0.00024	-0.00037
141.84	-0.00033	-0.00045	-0.00039	-8e-05
142.08	-0.00033	-0.00036	-0.0004	-0.00036
142.32	-0.00035	-0.00037	-0.00051	-0.00019
142.56	-0.00029	-0.00023	-0.00031	-0.00053
142.8	-0.00029	-0.0004	-0.00037	-0.00025
143.04	-0.00022	-0.00033	-0.00047	-0.00018
143.28	-0.00027	-0.00041	-0.00048	-0.00026
143.52	-0.00017	-0.00052	-0.00042	-0.00035
143.76	-0.00032	-0.0003	-0.00035	-3e-05
144	-0.00035	-0.00048	-0.00057	-0.00031
144.24	-0.00033	-0.00045	-0.00049	-0.00035
144.48	-0.00024	-0.00033	-0.0003	-0.00021
144.72	-0.00046	-0.00042	-0.00027	-0.00034
144.96	-0.00018	-0.00029	-0.0004	-0.00024
145.2	-0.0003	-0.00044	-0.00052	-0.00031
145.44	-0.00027	-0.00038	-0.0005	-0.00032
145.68	-0.00034	-0.00036	-0.00047	-0.00032
145.92	-0.00022	-0.00042	-0.00049	-0.00047
146.16	-0.00027	-0.0004	-0.00037	-0.00016
146.4	-0.00031	-0.00043	-0.00049	-0.00056
146.64	-0.0003	-0.00018	-0.00049	-0.00042
146.88	-0.00035	-0.00038	-0.00047	-0.00021
147.12	-0.00026	-0.00023	-0.00046	-0.00023
147.36	-0.00036	-0.00046	-0.00046	-0.0001
147.6	-0.0004	-0.00041	-0.00039	-0.00027
147.84	-0.00014	-0.00041	-0.00037	-0.00022
148.08	-0.00029	-0.00069	-0.0004	-0.00023
148.32	-0.00035	-0.00048	-0.00033	-0.00041
148.56	-0.00028	-0.00041	-0.0005	-0.00032
148.8	-0.00035	-0.00035	-0.00033	-0.00047
149.04	-0.00042	-0.00037	-0.00046	-0.00024
149.28	-0.00025	-0.00046	-0.00049	-0.00026
149.52	-0.00041	-0.00041	-0.00033	-0.00045
149.76	-0.0004	-0.00037	-0.00044	-0.00054
150	-0.00041	-0.00028	-0.00034	5e-05
150.24	-0.00021	-0.00048	-0.00045	0.00012
150.48	1e-05	-0.00032	-0.00022	0.00025
150.72	-0.00681	-0.00785	-0.00756	-0.00754
150.96	-0.03509	-0.03868	-0.03775	-0.03838
151.2	0.00893	0.01236	0.01045	0.01249
151.44	-0.01189	-0.01356	-0.01124	-0.01303
151.68	0.00057*	0.00022*	0.00229*	0.00055*
151.92	0.00055	-0.00012	-0.00014	0.00039
152.16	0.00049	5e-05	0.00016	0.00052
152.4	0.00056	8e-05	0.00029	0.00041
152.64	0.00048	8e-05	0.00011	0.00063
152.88	0.00072	0.00026	0.00036	0.00084
153.12	0.00078	0.00024	0.00037	0.0008
153.36	0.00087	0.00038	0.00046	0.00081
153.6	0.00112	0.00039	0.00053	0.00044
153.84	0.00085	0.00043	0.00053	0.00081
154.08	0.00099	0.00051	0.00046	0.00055
154.32	0.00109	0.00047	0.00061	0.00058
154.56	0.00124	0.00067	0.00046	0.00087
154.8	0.00123	0.00054	0.00055	0.00088
155.04	0.00138	0.0006	0.00066	0.00075
155.28	0.00107	0.0007	0.00063	0.00095
155.52	0.00132	0.00085	0.00075	0.00076
155.76	0.00124	0.00055	0.0008	0.00114
156	0.00132	0.00079	0.00085	0.00102
156.24	0.00137	0.00059	0.00088	0.00094
156.48	0.00146	0.00084	0.00082	0.00086
156.72	0.00156	0.00076	0.0008	0.00125
156.96	0.00151	0.00106	0.00108	0.00088
157.2	0.00161	0.00069	0.0011	0.00089
157.44	0.0015	0.00096	0.00091	0.00129
157.68	0.00164	0.00092	0.00084	0.0013
157.92	0.00162	0.00128	0.00102	0.00124
158.16	0.00173	0.00112	0.00111	0.00122
158.4	0.00171	0.00092	0.00117	0.00114
158.64	0.00181	0.00108	0.0011	0.00127
158.88	0.00179	0.00117	0.00107	0.00135
159.12	0.00171	0.00116	0.00134	0.00132
159.36	0.00168	0.00131	0.00127	0.00127
159.6	0.00168	0.00126	0.00106	0.00126
159.84	0.00199	0.00101	0.00127	0.00126
160.08	0.00179	0.00111	0.00129	0.00125
160.32	0.00199	0.00132	0.00105	0.00124
160.56	0.00191	0.00129	0.00129	0.00139
160.8	0.00195	0.00128	0.00121	0.00154
161.04	0.00198	0.00113	0.00137	0.00151
161.28	0.00189	0.0013	0.00128	0.00139
161.52	0.00213	0.00126	0.00134	0.00133
161.76	0.00212	0.00153	0.00134	0.00144
162	0.00188	0.00126	0.00134	0.00145
162.24	0.00206	0.00127	0.00134	0.00155
162.48	0.00201	0.0012	0.0014	0.0016
162.72	0.00209	0.00154	0.00133	0.00143
162.96	0.00198	0.00148	0.00144	0.00157
163.2	0.00234	0.00145	0.00137	0.00116
163.44	0.00213	0.00148	0.00158	0.00156
163.68	0.00214	0.00165	0.00146	0.00131
163.92	0.0022	0.00137	0.00146	0.00148
164.16	0.00229	0.00132	0.00147	0.00143
164.4	0.00205	0.00144	0.00173	0.00175
164.64	0.00215	0.0015	0.00156	0.00135
164.88	0.00218	0.00142	0.00174	0.0018
165.12	0.00215	0.00147	0.00171	0.00136
165.36	0.00232	0.00146	0.00158	0.00141
165.6	0.00211	0.00144	0.00152	0.00147
165.84	0.00225	0.00158	0.00131	0.00153
166.08	0.00222	0.00155	0.00149	0.00162
166.32	0.00233	0.00145	0.00155	0.00152
166.56	0.00227	0.00167	0.00158	0.00193
166.8	0.00224	0.00149	0.00153	0.00169
167.04	0.00227	0.00172	0.00181	0.0017
167.28	0.00227	0.00153	0.00159	0.0018
167.52	0.00231	0.00177	0.00175	0.00179
167.76	0.00235	0.00154	0.00179	0.00174
168	0.00247	0.00173	0.00136	0.00155
168.24	0.00243	0.00169	0.00181	0.00168
168.48	0.00239	0.00167	0.00158	0.00184
168.72	0.00225	0.00171	0.00167	0.00176
168.96	0.0023	0.00169	0.00163	0.00156
169.2	0.0024	0.00187	0.00166	0.00171
169.44	0.00234	0.00161	0.00178	0.00175
169.68	0.00237	0.00169	0.00189	0.00195
169.92	0.00249	0.00167	0.0017	0.00199
170.16	0.00245	0.00176	0.00196	0.0019
170.4	0.00239	0.00179	0.00185	0.00161
170.64	0.0023	0.00176	0.00172	0.00176
170.88	0.00241	0.00164	0.00173	0.0017
171.12	0.00262	0.00171	0.00191	0.00177
171.36	0.00255	0.00167	0.00185	0.00209
171.6	0.00254	0.00188	0.00183	0.0019
171.84	0.00249	0.00181	0.00187	0.00179
172.08	0.0023	0.00178	0.00189	0.00188
172.32	0.0025	0.00164	0.00188	0.00185
172.56	0.0026	0.0017	0.00199	0.00156
172.8	0.00241	0.00176	0.00177	0.00169
173.04	0.00249	0.0019	0.00199	0.00182
173.28	0.00255	0.0018	0.00188	0.00195
173.52	0.00236	0.00177	0.00199	0.00232
173.76	0.00261	0.00185	0.00195	0.00182
174	0.00261	0.00192	0.00184	0.00178
174.24	0.00251	0.00188	0.00196	0.002
174.48	0.00259	0.00185	0.00179	0.00207
174.72	0.00254	0.00181	0.00194	0.00192
174.96	0.00253	0.00184	0.00193	0.00191
175.2	0.00242	0.00177	0.00193	0.00225
175.44	0.00264	0.0018	0.00204	0.00206
175.68	0.00263	0.00198	0.00193	0.00192
175.92	0.00272	0.00174	0.00197	0.00169
176.16	0.0025	0.00191	0.00209	0.00173
176.4	0.00255	0.00191	0.00201	0.00198
176.64	0.00277	0.00184	0.00194	0.00186
176.88	0.00268	0.00178	0.00215	0.00203
177.12	0.00264	0.00199	0.00221	0.00185
177.36	0.0026	0.0018	0.00191	0.00204
177.6	0.00262	0.0019	0.00187	0.00203
177.84	0.00266	0.0019	0.00208	0.00207
178.08	0.00278	0.00191	0.002	0.00216
178.32	0.00269	0.00201	0.00205	0.00196
178.56	0.00261	0.00198	0.00192	0.00196
178.8	0.00266	0.00203	0.00212	0.00206
179.04	0.00243	0.00182	0.00194	0.0018
179.28	0.00243	0.00199	0.002	0.00204
179.52	0.00257	0.00188	0.00202	0.002
179.76	0.00262	0.00199	0.00208	0.00178
180	0.0026	0.00199	0.00206	0.00211
180.24	0.00254	0.00176	0.00201	0.00194
180.48	0.00267	0.00188	0.00201	0.00201
180.72	0.00278	0.00208	0.00209	0.00207
180.96	0.00262	0.00206	0.00229	0.00213
181.2	0.00274	0.0021	0.00197	0.00208
181.44	0.00258	0.00197	0.00194	0.00199
181.68	0.00255	0.00209	0.00197	0.00191
181.92	0.00257	0.00183	0.00196	0.00191
182.16	0.00253	0.00209	0.00216	0.00217
182.4	0.00271	0.00198	0.00242	0.00214
182.64	0.00274	0.00188	0.00196	0.00215
182.88	0.00283	0.00212	0.00203	0.00233
183.12	0.00283	0.00188	0.00214	0.00208
183.36	0.00266	0.00188	0.00202	0.002
183.6	0.00271	0.00209	0.0022	0.00215
183.84	0.00253	0.00212	0.00226	0.00213
184.08	0.00277	0.0019	0.00202	0.00194
184.32	0.00266	0.00189	0.00196	0.00198
184.56	0.00271	0.00233	0.00208	0.00207
184.8	0.00269	0.00202	0.00222	0.00214
185.04	0.00254	0.00214	0.0024	0.0023
185.28	0.00259	0.00206	0.0022	0.00214
185.52	0.00265	0.00192	0.0021	0.00224
185.76	0.00281	0.002	0.0021	0.00195
186	0.00282	0.00216	0.00203	0.00212
186.24	0.00269	0.00198	0.00223	0.00214
186.48	0.00266	0.00206	0.00228	0.00228
186.72	0.00272	0.00203	0.00209	0.00208
186.96	0.0028	0.00197	0.00228	0.00235
187.2	0.00262	0.0022	0.00228	0.00235
187.44	0.00271	0.00216	0.00216	0.00228
187.68	0.00276	0.00202	0.00229	0.00203
187.92	0.0028	0.00205	0.00243	0.00194
188.16	0.00283	0.0018	0.0023	0.00231
188.4	0.00304	0.00219	0.00196	0.00239
188.64	0.0026	0.00206	0.00223	0.0022
188.88	0.00264	0.00223	0.00221	0.00204
189.12	0.00269	0.00201	0.00225	0.00219
189.36	0.00272	0.00207	0.00225	0.00207
189.6	0.00267	0.0022	0.00221	0.00203
189.84	0.0029	0.00227	0.00227	0.00226
190.08	0.00291	0.00195	0.00253	0.00209
190.32	0.00281	0.00209	0.00239	0.0019
190.56	0.00283	0.00213	0.00219	0.00217
190.8	0.00284	0.00224	0.00224	0.00213
191.04	0.00264	0.00203	0.00219	0.00202
191.28	0.00288	0.00223	0.00217	0.00221
191.52	0.00264	0.00221	0.00247	0.00204
191.76	0.00281	0.00211	0.00235	0.00218
192	0.00268	0.00222	0.00245	0.00235
192.24	0.00268	0.00204	0.0022	0.00234
192.48	0.00295	0.00201	0.00247	0.00198
192.72	0.00287	0.0023	0.00234	0.00227
192.96	0.00296	0.00213	0.00217	0.00216
193.2	0.00278	0.00204	0.00215	0.00223
193.44	0.00286	0.00192	0.00253	0.00202
193.68	0.0026	0.00206	0.00207	0.00213
193.92	0.00275	0.00208	0.00233	0.00202
194.16	0.00265	0.00217	0.00227	0.00224
194.4	0.00272	0.00191	0.00239	0.00221
194.64	0.00278	0.00194	0.00211	0.00219
194.88	0.00268	0.00202	0.00213	0.0023
195.12	0.00285	0.00217	0.00254	0.00207
195.36	0.00272	0.00211	0.00235	0.00214
195.6	0.00264	0.00207	0.00242	0.00229
195.84	0.00275	0.00217	0.00232	0.00206
196.08	0.00275	0.00199	0.00231	0.00193
196.32	0.00287	0.00203	0.00229	0.00232
196.56	0.00273	0.00209	0.00229	0.00229
196.8	0.003	0.00211	0.0024	0.00241
197.04	0.00274	0.00209	0.00234	0.00206
197.28	0.00278	0.00222	0.00242	0.00216
197.52	0.00301	0.00202	0.00234	0.00224
197.76	0.00269	0.00184	0.00235	0.00216
198	0.00292	0.00216	0.00245	0.00215
198.24	0.0028	0.00224	0.00238	0.00215
198.48	0.00284	0.00197	0.00235	0.00224
198.72	0.00287	0.00202	0.00228	0.00223
198.96	0.00277	0.00222	0.00233	0.00203
199.2	0.0027	0.00211	0.00246	0.00226
199.44	0.00266	0.00196	0.00243	0.00227
199.68	0.00264	0.00211	0.0021	0.00224
199.92	0.00262	0.00196	0.00224	0.00211
200.16	0.00268	0.00205	0.00232	0.00214
200.4	0.00262	0.00204	0.00227	0.00226
200.64	0.00268	0.00216	0.00239	0.00223
200.88	0.00279	0.00204	0.00234	0.00218
201.12	0.0028	0.00213	0.00238	0.00186
201.36	0.00295	0.00202	0.00235	0.00194
201.6	0.00266	0.00212	0.00219	0.0022
201.84	0.00269	0.00229	0.00243	0.00245
202.08	0.00267	0.00227	0.00234	0.00231
202.32	0.00278	0.002	0.00233	0.00228
202.56	0.00279	0.00222	0.00239	0.00209
202.8	0.00273	0.00219	0.00242	0.00227
203.04	0.00294	0.00206	0.0025	0.00243
203.28	0.00281	0.00192	0.00233	0.00222
203.52	0.00266	0.00208	0.00259	0.00227
203.76	0.00282	0.00229	0.00242	0.00211
204	0.00284	0.00202	0.00215	0.00199
204.24	0.0026	0.00223	0.00229	0.00216
204.48	0.00256	0.00199	0.00255	0.00218
204.72	0.00291	0.0021	0.00238	0.0024
204.96	0.00272	0.00252	0.00242	0.00205
205.2	0.00276	0.00209	0.00228	0.00225
205.44	0.00288	0.00208	0.00246	0.00207
205.68	0.00278	0.00206	0.00239	0.00225
205.92	0.00271	0.00224	0.00234	0.00248
206.16	0.0027	0.002	0.00243	0.00234
206.4	0.00292	0.00215	0.00226	0.00228
206.64	0.00277	0.00209	0.00246	0.00205
206.88	0.00282	0.00236	0.00246	0.00233
207.12	0.00272	0.00215	0.00239	0.00224
207.36	0.00274	0.00222	0.00237	0.0022
207.6	0.00283	0.00221	0.00243	0.0023
207.84	0.0028	0.00218	0.00237	0.00228
208.08	0.00268	0.00219	0.00222	0.0022
208.32	0.00269	0.00208	0.00238	0.00226
208.56	0.00274	0.00203	0.00253	0.00235
208.8	0.0027	0.0025	0.00227	0.00225
209.04	0.00277	0.00194	0.0024	0.00232
209.28	0.00253	0.00198	0.00231	0.00192
209.52	0.00278	0.00214	0.00232	0.00206
209.76	0.00301	0.00207	0.00231	0.00214
210	0.00251	0.00207	0.00238	0.00228
210.24	0.00299	0.00224	0.00249	0.00243
210.48	0.00286	0.00214	0.00247	0.00217
210.72	0.00272	0.00249	0.00252	0.00212
210.96	0.00271	0.00195	0.00241	0.00233
211.2	0.00285	0.00216	0.00234	0.00216
211.44	0.00275	0.00221	0.0023	0.00224
211.68	0.00282	0.00212	0.00259	0.00223
211.92	0.00286	0.00215	0.00238	0.00232
212.16	0.00269	0.00193	0.00254	0.00217
212.4	0.00261	0.0022	0.0021	0.00199
212.64	0.00282	0.0021	0.00244	0.00235
212.88	0.00268	0.00237	0.00237	0.00217
213.12	0.00279	0.00201	0.00241	0.00214
213.36	0.00274	0.00208	0.0025	0.00217
213.6	0.00262	0.00203	0.00247	0.0021
213.84	0.00297	0.00228	0.00254	0.0023
214.08	0.00277	0.00233	0.00247	0.00208
214.32	0.00275	0.00215	0.00236	0.0023
214.56	0.00285	0.00203	0.00222	0.00233
214.8	0.00272	0.00242	0.00225	0.00237
215.04	0.00275	0.00225	0.0024	0.00217
215.28	0.00275	0.00204	0.0023	0.00244
215.52	0.00265	0.00217	0.00249	0.00233
215.76	0.00287	0.00215	0.00238	0.00221
216	0.00267	0.00228	0.00245	0.00205
216.24	0.00275	0.00219	0.00231	0.00245
216.48	0.00278	0.00228	0.00273	0.00212
216.72	0.00274	0.00187	0.00223	0.0021
216.96	0.00282	0.00205	0.00248	0.00228
217.2	0.00276	0.00237	0.00257	0.00216
217.44	0.00257	0.00194	0.00228	0.00236
217.68	0.00268	0.00218	0.00244	0.00229
217.92	0.00287	0.00216	0.0024	0.00212
218.16	0.00285	0.00212	0.00244	0.00229
218.4	0.00279	0.00205	0.00247	0.00217
218.64	0.00258	0.00197	0.00227	0.00223
218.88	0.00271	0.00233	0.00257	0.00222
219.12	0.00274	0.00222	0.0023	0.00238
219.36	0.00287	0.00228	0.00244	0.00201
219.6	0.00263	0.00197	0.00239	0.00216
219.84	0.00253	0.00211	0.0023	0.00226
220.08	0.00268	0.00209	0.00244	0.00229
220.32	0.00271	0.00215	0.00237	0.00231
220.56	0.00285	0.00231	0.00263	0.00209
220.8	0.00287	0.00218	0.00242	0.00203
221.04	0.0027	0.00202	0.00238	0.00224
221.28	0.00271	0.00206	0.00246	0.00236
221.52	0.0026	0.00226	0.00245	0.00214
221.76	0.00277	0.0023	0.0023	0.00225
222	0.00262	0.00213	0.00265	0.00223
222.24	0.0027	0.00214	0.00248	0.00214
222.48	0.00269	0.00212	0.00242	0.00231
222.72	0.00285	0.00225	0.00242	0.00199
222.96	0.00263	0.00214	0.00235	0.0023
223.2	0.00284	0.0022	0.00236	0.00208
223.44	0.00269	0.00242	0.00228	0.00215
223.68	0.00253	0.0023	0.00228	0.00233
223.92	0.00255	0.00227	0.00243	0.0024
224.16	0.00277	0.00203	0.00239	0.00237
224.4	0.0026	0.00221	0.0026	0.00228
224.64	0.00276	0.00206	0.00248	0.00196
224.88	0.00265	0.00213	0.00237	0.00211
225.12	0.00275	0.00219	0.00238	0.00244
225.36	0.00268	0.0021	0.00258	0.00233
225.6	0.00257	0.00225	0.00239	0.00232
225.84	0.00276	0.00203	0.00235	0.00227
226.08	0.00258	0.00233	0.00249	0.00226
226.32	0.00276	0.00214	0.00242	0.00206
226.56	0.00282	0.0023	0.00245	0.00233
226.8	0.00256	0.00215	0.00248	0.0023
227.04	0.00265	0.00206	0.00254	0.00215
227.28	0.00259	0.00209	0.00228	0.0021
227.52	0.00275	0.00195	0.00261	0.00214
227.76	0.00257	0.00223	0.00257	0.00198
228	0.00279	0.00237	0.00231	0.00222
228.24	0.00259	0.0023	0.00232	0.00202
228.48	0.00271	0.00224	0.00246	0.00236
228.72	0.00278	0.00212	0.00238	0.00208
228.96	0.00256	0.00205	0.0024	0.00211
229.2	0.00258	0.00224	0.00259	0.00216
229.44	0.00266	0.00218	0.00235	0.00219
229.68	0.00256	0.00199	0.0024	0.002
229.92	0.00271	0.0023	0.0022	0.00229
230.16	0.00259	0.00219	0.00235	0.00205
230.4	0.00264	0.00215	0.0024	0.00226
230.64	0.0026	0.00214	0.00235	0.00227
230.88	0.00259	0.00212	0.00222	0.00233
231.12	0.00272	0.00195	0.00239	0.00246
231.36	0.00264	0.0021	0.00233	0.00248
231.6	0.0026	0.00222	0.00241	0.00219
231.84	0.00263	0.00224	0.00231	0.00246
232.08	0.00252	0.00205	0.00235	0.00226
232.32	0.00268	0.00191	0.00237	0.00248
232.56	0.00278	0.00231	0.00252	0.00234
232.8	0.00259	0.00223	0.00228	0.00209
233.04	0.00256	0.0022	0.00229	0.00214
233.28	0.00282	0.00202	0.00227	0.002
233.52	0.00262	0.00223	0.00233	0.0023
233.76	0.00269	0.00195	0.00219	0.00213
234	0.00257	0.00209	0.00243	0.00227
234.24	0.00264	0.00222	0.00246	0.00235
234.48	0.0026	0.00206	0.00237	0.00209
234.72	0.00251	0.00204	0.00247	0.00229
234.96	0.00263	0.00211	0.00228	0.00218
235.2	0.00272	0.00218	0.00253	0.00218
235.44	0.00248	0.0021	0.00254	0.002
235.68	0.00277	0.00209	0.0024	0.00217
235.92	0.00254	0.00203	0.00242	0.00226
236.16	0.00263	0.00194	0.0024	0.00212
236.4	0.00265	0.00214	0.00219	0.00229
236.64	0.00271	0.00231	0.00237	0.00232
236.88	0.00258	0.00216	0.00243	0.00235
237.12	0.00243	0.00213	0.00228	0.00232
237.36	0.00252	0.0022	0.00252	0.00226
237.6	0.00272	0.00203	0.00228	0.00201
237.84	0.00273	0.00197	0.00228	0.00229
238.08	0.00263	0.00199	0.0021	0.00209
238.32	0.00258	0.00191	0.00244	0.0024
238.56	0.00245	0.0019	0.00225	0.00205
238.8	0.00253	0.00197	0.00219	0.00237
239.04	0.00261	0.00209	0.00231	0.00204
239.28	0.00264	0.00199	0.00238	0.00246
239.52	0.00255	0.0021	0.00238	0.00241
239.76	0.00272	0.00194	0.00246	0.00202

## Sheet: GIV
Time	Exp1	Exp2	Exp3	Exp4
0	-8e-05	-1e-05	-6e-05	0.00017
0.24	-0.00019	-6e-05	5e-05	-0.00014
0.48	5e-05	-7e-05	3e-05	-9e-05
0.72	-0.0001	-0.00011	0.0001	-2e-05
0.96	-0.00026	-7e-05	-8e-05	-0.0001
1.2	0.00019	0.00019	0.00011	-2e-05
1.44	-4e-05	-4e-05	8e-05	0.00014
1.68	-0.00011	-1e-05	3e-05	0.00016
1.92	0.00012	-1e-05	0	0.00014
2.16	-0.0001	-2e-05	0	3e-05
2.4	-6e-05	6e-05	0.0001	8e-05
2.64	-0.0001	2e-05	0.00013	6e-05
2.88	1e-05	0.00013	0	1e-05
3.12	-4e-05	-0.00015	-1e-05	2e-05
3.36	-3e-05	3e-05	-8e-05	3e-05
3.6	-1e-05	5e-05	-4e-05	0.00013
3.84	-0.00012	0.00022	-3e-05	7e-05
4.08	-1e-05	0.0001	-5e-05	3e-05
4.32	-3e-05	-0.0001	6e-05	0
4.56	-5e-05	-5e-05	3e-05	8e-05
4.8	-5e-05	-4e-05	3e-05	-2e-05
5.04	-0.00013	0.00013	0	-1e-05
5.28	9e-05	0	6e-05	-0.0003
5.52	-8e-05	0.00035	0.00012	0.00018
5.76	0	1e-05	9e-05	0.00015
6	-5e-05	7e-05	3e-05	-5e-05
6.24	-4e-05	0.00011	2e-05	8e-05
6.48	9e-05	7e-05	9e-05	-0.0001
6.72	1e-05	-9e-05	-0.0001	1e-05
6.96	0.00014	5e-05	0	0
7.2	-7e-05	0.00021	6e-05	-5e-05
7.44	5e-05	4e-05	-2e-05	-0.00011
7.68	-0.00019	-1e-05	5e-05	-9e-05
7.92	0.00013	7e-05	-0.00011	4e-05
8.16	6e-05	0.00014	0.00023	-0.00016
8.4	0	2e-05	0	1e-05
8.64	-8e-05	0.00015	-2e-05	-8e-05
8.88	8e-05	0	9e-05	-0.00011
9.12	5e-05	-3e-05	-9e-05	-5e-05
9.36	-1e-05	-4e-05	0.00013	-6e-05
9.6	-8e-05	-0.00025	-4e-05	-0.00012
9.84	0	-1e-05	5e-05	3e-05
10.08	3e-05	-0.00023	5e-05	0.0001
10.32	-0.00018	-1e-05	-3e-05	-3e-05
10.56	-4e-05	9e-05	-3e-05	3e-05
10.8	1e-05	5e-05	1e-05	0.00022
11.04	-5e-05	-0.00017	-1e-05	0.0001
11.28	6e-05	-1e-05	-3e-05	-8e-05
11.52	-0.00025	-0.00023	-9e-05	-0.00022
11.76	-2e-05	-5e-05	0.00019	-0.00011
12	1e-05	-7e-05	-4e-05	0
12.24	-1e-05	2e-05	0	1e-05
12.48	0.0001	-1e-05	3e-05	-0.00013
12.72	1e-05	0	-0.0001	8e-05
12.96	-8e-05	5e-05	3e-05	-0.0002
13.2	2e-05	0.00017	0.00013	2e-05
13.44	-9e-05	3e-05	1e-05	5e-05
13.68	1e-05	0.00013	1e-05	6e-05
13.92	2e-05	-8e-05	-4e-05	-1e-05
14.16	1e-05	-0.00015	-2e-05	-0.0001
14.4	9e-05	7e-05	-7e-05	-9e-05
14.64	0.0001	0.00025	0	-0.00011
14.88	2e-05	3e-05	-3e-05	-3e-05
15.12	-1e-05	-7e-05	-2e-05	-2e-05
15.36	-0.00014	-0.00015	-0.0001	0.00028
15.6	-5e-05	0.0001	-0.00011	5e-05
15.84	0.0001	4e-05	3e-05	-0.00019
16.08	-8e-05	4e-05	1e-05	1e-05
16.32	-4e-05	-0.00011	4e-05	2e-05
16.56	5e-05	-0.00024	-0.00012	0.00017
16.8	7e-05	-5e-05	-6e-05	-8e-05
17.04	-9e-05	8e-05	-2e-05	-0.00016
17.28	2e-05	-0.00016	0.00012	-0.00017
17.52	5e-05	8e-05	-0.00016	6e-05
17.76	7e-05	2e-05	5e-05	-0.00016
18	-4e-05	0.00019	-9e-05	0.0001
18.24	-0.00013	0.0001	-4e-05	6e-05
18.48	7e-05	-0.00012	-0.00012	-0.00013
18.72	-4e-05	-4e-05	-4e-05	0.00026
18.96	8e-05	-0.00015	3e-05	5e-05
19.2	0	-7e-05	2e-05	6e-05
19.44	3e-05	-0.00021	-1e-05	-0.00022
19.68	6e-05	0.00013	-5e-05	0.00012
19.92	-0.00011	7e-05	-9e-05	-0.00013
20.16	-2e-05	-0.00015	-2e-05	-6e-05
20.4	-1e-05	0.0002	1e-05	2e-05
20.64	6e-05	-5e-05	0.00012	-4e-05
20.88	-0.00017	3e-05	5e-05	-0.00014
21.12	0.0001	0	9e-05	0.00022
21.36	0.00014	-0.00023	-0.0001	3e-05
21.6	5e-05	-0.00012	2e-05	-0.00019
21.84	0.00017	9e-05	-2e-05	-0.00015
22.08	4e-05	-1e-05	-3e-05	0.00029
22.32	-3e-05	-0.0001	2e-05	0.00013
22.56	2e-05	-4e-05	-1e-05	-0.0001
22.8	6e-05	-5e-05	-0.00011	0.00018
23.04	3e-05	-0.00011	-1e-05	0.00016
23.28	8e-05	-5e-05	-8e-05	0.0001
23.52	-3e-05	0.00015	0	-4e-05
23.76	-4e-05	-4e-05	6e-05	1e-05
24	-0.00024	8e-05	6e-05	3e-05
24.24	-7e-05	-0.00013	-3e-05	-8e-05
24.48	-1e-05	-0.00015	-1e-05	-0.00028
24.72	9e-05	0.00012	2e-05	0.00018
24.96	0.00025	6e-05	-0.00015	7e-05
25.2	0.00025	0	-7e-05	0.00032
25.44	0.0001	-8e-05	-1e-05	-3e-05
25.68	8e-05	2e-05	2e-05	-7e-05
25.92	7e-05	-5e-05	2e-05	8e-05
26.16	0	-0.00027	0.00018	-0.00013
26.4	-9e-05	0.00011	-0.0001	-0.00019
26.64	0.00016	9e-05	-8e-05	1e-05
26.88	-1e-05	5e-05	-6e-05	-7e-05
27.12	2e-05	-3e-05	-3e-05	-0.00013
27.36	-0.00017	0.00014	0.0001	0.00022
27.6	4e-05	4e-05	6e-05	6e-05
27.84	2e-05	0.00012	-0.00016	-3e-05
28.08	-2e-05	0	-1e-05	0.00022
28.32	8e-05	1e-05	4e-05	0.00012
28.56	0.00026	0.0001	-6e-05	-7e-05
28.8	0.00013	-0.00015	-1e-05	-0.00015
29.04	7e-05	5e-05	0	0.0001
29.28	4e-05	-2e-05	-4e-05	0.00036
29.52	0.00011	-1e-05	-3e-05	7e-05
29.76	0.00013	-0.00012	-4e-05	0.00018
30	0.00011	0.00016	8e-05	0.00019
30.24	0.00046	0.00018	0.00021	9e-05
30.48	0.00038	5e-05	0.00015	0.00027
30.72	-0.00576	-0.00568	-0.00712	-0.00684
30.96	-0.03349	-0.03323	-0.0414	-0.03757
31.2	0.00913	0.01306	0.0107	0.01283
31.44	-0.00999	-0.00948	-0.01446	-0.01109
31.68	0.00235*	0.00329*	0.00013*	0.00264*
31.92	0.0001	5e-05	6e-05	-0.00016
32.16	0.00031	0.00021	-0.00018	-0.00022
32.4	0.00032	0.00017	-6e-05	-8e-05
32.64	-3e-05	0.00016	3e-05	9e-05
32.88	0.00013	8e-05	5e-05	4e-05
33.12	7e-05	4e-05	0.00015	5e-05
33.36	0.00018	4e-05	1e-05	0.00019
33.6	2e-05	0.00012	-1e-05	6e-05
33.84	-2e-05	0.00012	0.0001	-0.00022
34.08	2e-05	0.00016	6e-05	9e-05
34.32	0.00024	0.00013	5e-05	-0.00021
34.56	-2e-05	0.00011	-0.0001	-0.00018
34.8	0.00019	9e-05	0	0.00011
35.04	4e-05	0.0001	8e-05	-0.0002
35.28	9e-05	0.00018	-4e-05	-0.00022
35.52	4e-05	0.00011	3e-05	0
35.76	0.00025	-1e-05	1e-05	1e-05
36	0.00025	0.00035	-4e-05	-0.00014
36.24	4e-05	6e-05	0	-3e-05
36.48	8e-05	8e-05	-1e-05	-0.00018
36.72	6e-05	1e-05	-6e-05	-0.00013
36.96	2e-05	0.00014	1e-05	0.00013
37.2	0.0001	0.00017	8e-05	-0.0003
37.44	0.00011	0.0001	-7e-05	-6e-05
37.68	0.00016	0.00012	-0.00013	-4e-05
37.92	0.00025	0.0001	-0.00014	0.00014
38.16	0.00013	0.0001	-2e-05	0.00013
38.4	0.00014	0.00016	-0.0001	-5e-05
38.64	0.0002	-7e-05	0	-0.00013
38.88	0.0001	2e-05	0	-0.00022
39.12	0.00012	8e-05	-0.00016	-0.00026
39.36	0.00022	0.00012	2e-05	-0.00012
39.6	0.00018	0.00011	-0.0001	-0.00023
39.84	0.00019	0.00015	-0.00011	-6e-05
40.08	0.00027	9e-05	-5e-05	-2e-05
40.32	0.00023	0.00017	-0.00013	-0.00015
40.56	8e-05	5e-05	-3e-05	-0.00014
40.8	1e-05	0.0001	-0.0001	-0.00025
41.04	0.0001	-6e-05	-0.00011	-6e-05
41.28	0.0002	0.00021	3e-05	-0.00018
41.52	0.00024	0.00014	2e-05	-0.00015
41.76	6e-05	0.00028	-0.0001	-0.00024
42	0.00021	-2e-05	-0.00015	4e-05
42.24	9e-05	-3e-05	-0.00013	-9e-05
42.48	5e-05	-8e-05	-0.00013	-0.00014
42.72	0.00023	3e-05	-1e-05	-0.00022
42.96	7e-05	0.00021	0.0001	-9e-05
43.2	0.00018	8e-05	-2e-05	-0.00039
43.44	0.00016	0.00014	0	-0.00018
43.68	0.00014	7e-05	-5e-05	-0.00028
43.92	9e-05	0.00012	-9e-05	4e-05
44.16	-2e-05	-9e-05	-0.0001	-0.00015
44.4	0.00027	-0.00018	-4e-05	-0.00014
44.64	4e-05	0.00024	4e-05	-3e-05
44.88	0.0002	7e-05	-8e-05	0
45.12	0.00011	0.00013	-0.00016	-0.00023
45.36	0.00014	-6e-05	-0.00013	1e-05
45.6	0.0001	-0.0002	-4e-05	-0.00015
45.84	4e-05	-0.00015	-7e-05	-8e-05
46.08	0.00034	5e-05	-3e-05	-0.00012
46.32	9e-05	0.0001	-7e-05	9e-05
46.56	3e-05	7e-05	-0.00021	-0.00011
46.8	0.00022	-1e-05	-0.00012	-0.00011
47.04	0.00013	-8e-05	6e-05	-5e-05
47.28	0.00023	-9e-05	-0.00011	-0.00027
47.52	0.00018	0.0001	-0.00011	-4e-05
47.76	-1e-05	0.0001	2e-05	-4e-05
48	0.00016	0.00015	-0.00012	-6e-05
48.24	0.00018	9e-05	-9e-05	-0.0004
48.48	5e-05	-5e-05	1e-05	-0.0001
48.72	0.00027	0.00018	-8e-05	-0.00046
48.96	-1e-05	-0.00015	-0.00014	-0.00018
49.2	0.00011	3e-05	1e-05	-0.00023
49.44	5e-05	0.00016	-0.00012	-0.0002
49.68	0.00017	0.00014	-0.00016	-6e-05
49.92	-1e-05	9e-05	-7e-05	-1e-05
50.16	-7e-05	-2e-05	-0.00012	-0.00024
50.4	0.00016	0.00012	3e-05	-0.00015
50.64	-5e-05	-0.00015	-4e-05	-0.0002
50.88	0.0001	5e-05	-8e-05	-9e-05
51.12	9e-05	0	-5e-05	1e-05
51.36	0.00015	9e-05	-8e-05	-3e-05
51.6	-0.00021	0.0001	-0.00011	-0.00013
51.84	0.00034	0.0001	-0.00015	-7e-05
52.08	0.00015	-7e-05	-5e-05	-0.0004
52.32	2e-05	3e-05	-0.0001	-0.00014
52.56	0.0001	4e-05	-3e-05	-0.00027
52.8	0.0002	-6e-05	1e-05	-0.00024
53.04	0.00024	0.00029	-0.00016	-0.00013
53.28	-2e-05	0.00017	-6e-05	4e-05
53.52	3e-05	0.00011	-1e-05	-0.00037
53.76	5e-05	-0.00018	-0.00016	-0.0001
54	-0.00018	-0.00018	-0.00026	-0.00011
54.24	5e-05	-7e-05	-0.00011	-0.00017
54.48	0.00026	-9e-05	-9e-05	-0.00016
54.72	8e-05	0.00016	-0.00012	9e-05
54.96	0.0002	-3e-05	-0.00022	-0.00031
55.2	0.00018	8e-05	-9e-05	-0.00011
55.44	-0.00013	1e-05	-5e-05	-0.00035
55.68	0.00013	-0.00027	-0.00016	-0.00032
55.92	7e-05	-0.0001	-0.0002	-0.00022
56.16	0.00013	-6e-05	-0.00022	-0.00014
56.4	4e-05	0.00013	-2e-05	-0.00022
56.64	0.00011	0.00024	-0.00012	-0.0001
56.88	8e-05	9e-05	-0.00017	-0.00011
57.12	0.00011	-5e-05	-0.00021	-5e-05
57.36	0.0002	1e-05	-0.00017	-6e-05
57.6	3e-05	-0.00013	-9e-05	-0.00027
57.84	8e-05	-0.0001	-0.00015	-0.00019
58.08	0.0001	0.00011	-0.00015	-0.0002
58.32	0.00016	-8e-05	-0.00018	-0.00018
58.56	0	-0.0002	-0.00022	-0.00023
58.8	6e-05	1e-05	-1e-05	-9e-05
59.04	0.00017	9e-05	-3e-05	-8e-05
59.28	0	-0.0001	-0.00019	-0.0002
59.52	-4e-05	5e-05	-0.00024	-0.00016
59.76	3e-05	-4e-05	-0.00013	-0.00023
60	-3e-05	0.00012	-0.00019	-0.00028
60.24	4e-05	-9e-05	-0.00014	-0.00016
60.48	0	-1e-05	-3e-05	-0.00034
60.72	0.00017	-0.00016	-0.00018	-0.0003
60.96	3e-05	-4e-05	-0.0003	-0.00025
61.2	0.00024	5e-05	1e-05	-0.00024
61.44	0.00015	-0.00012	-0.00015	-0.0003
61.68	-0.00011	0.00014	-0.00013	-0.0001
61.92	-8e-05	-7e-05	-0.0002	-0.0002
62.16	7e-05	-9e-05	-0.00026	-3e-05
62.4	2e-05	0.00011	-0.00021	-0.00025
62.64	0.00018	-0.00011	-0.00017	-0.00023
62.88	0.00021	-4e-05	-0.00012	-0.00047
63.12	-9e-05	-4e-05	-0.00012	-0.0003
63.36	1e-05	0.0001	-0.00024	-0.00026
63.6	0.00031	3e-05	-0.00012	-7e-05
63.84	0.00026	-7e-05	-5e-05	-7e-05
64.08	6e-05	8e-05	-0.00016	-4e-05
64.32	0.00018	-1e-05	-0.00019	-9e-05
64.56	0.00015	0.00019	-0.0002	-0.0001
64.8	-9e-05	3e-05	-0.00013	-0.00028
65.04	9e-05	0.00021	-6e-05	-0.00026
65.28	7e-05	9e-05	-1e-05	-0.00029
65.52	0	-0.0002	-6e-05	-0.00018
65.76	7e-05	4e-05	-0.00027	-0.00019
66	0.00033	0.00011	-9e-05	-0.00032
66.24	2e-05	6e-05	-0.0001	-0.00021
66.48	9e-05	3e-05	-7e-05	0.00018
66.72	0.00019	7e-05	-8e-05	-0.00033
66.96	6e-05	-0.00017	-9e-05	-0.00028
67.2	0.00019	0.00018	-6e-05	-0.00049
67.44	0.00044	-0.00011	-0.00011	-0.00022
67.68	8e-05	-0.00016	-0.00015	-0.00034
67.92	0.00018	0.0001	-0.00015	-0.00028
68.16	0.00027	0.00011	-0.00028	-0.00018
68.4	0.00013	-0.00022	-0.00018	0
68.64	6e-05	-0.00025	-0.00026	-0.00025
68.88	0.00011	0.00015	-7e-05	-0.00032
69.12	0.00016	3e-05	-0.00022	-0.00028
69.36	0.00017	0.00012	0	-0.00012
69.6	9e-05	-9e-05	-0.00025	0.0001
69.84	8e-05	1e-05	-0.00012	-0.0002
70.08	8e-05	0.0002	-0.00014	-0.00039
70.32	-7e-05	-0.00011	-0.0002	-0.00034
70.56	3e-05	0.00017	-0.00012	-9e-05
70.8	7e-05	-2e-05	-0.00015	-0.0002
71.04	0.00018	-0.0001	-0.00021	-0.00013
71.28	0.00016	-1e-05	-0.00016	-0.00013
71.52	0.00013	2e-05	-0.00019	-0.00019
71.76	3e-05	0.00014	-0.00015	-0.00035
72	0.00028	-0.00015	-0.00011	-0.00034
72.24	6e-05	0.00015	-0.00016	-0.0004
72.48	0.00022	2e-05	-0.00022	-0.00014
72.72	0.00018	1e-05	-0.00011	-0.0005
72.96	0.00021	2e-05	-0.0002	-0.00024
73.2	1e-05	-0.00018	-0.00018	-0.00037
73.44	0.00025	1e-05	-0.00027	-0.00012
73.68	2e-05	-3e-05	-0.00016	-9e-05
73.92	0.00026	-0.00023	-0.0003	-0.00016
74.16	0.00014	-5e-05	-0.00026	-0.0003
74.4	4e-05	9e-05	-0.00024	-0.00029
74.64	0.0002	-2e-05	-0.00015	-0.00021
74.88	7e-05	-3e-05	-0.00029	-0.00016
75.12	0.00038	-0.00018	-0.00024	-0.00038
75.36	0.00013	0.0001	-0.00013	-0.00013
75.6	7e-05	-0.00012	-0.00024	-0.0002
75.84	3e-05	-3e-05	-0.00031	-0.00022
76.08	4e-05	-0.00012	-0.00011	-0.00038
76.32	0.00031	8e-05	-0.00027	-0.00038
76.56	-0.00013	-9e-05	-0.00026	-0.00016
76.8	-0.0001	0.00012	-0.00026	-0.00031
77.04	8e-05	-6e-05	-4e-05	-5e-05
77.28	0.00028	-2e-05	-0.00023	-0.00038
77.52	0.00024	-0.00022	-0.00021	-0.00028
77.76	6e-05	-6e-05	-0.00019	-0.00018
78	0.00017	0	-0.00024	-0.00018
78.24	-2e-05	-3e-05	-0.00012	-0.00017
78.48	0.00011	0.00012	-0.00034	-0.00043
78.72	0.00012	-0.0002	-0.00012	-0.00012
78.96	0.00013	-0.0001	-0.00021	-7e-05
79.2	0	-9e-05	-0.00019	1e-05
79.44	0.00014	-0.00013	-0.00036	-0.0003
79.68	0.00012	-0.0002	-0.00029	-0.0004
79.92	-5e-05	7e-05	-0.0002	-0.00013
80.16	0.0001	-0.00013	-0.00019	-7e-05
80.4	0.00013	-0.00013	0	-0.00026
80.64	6e-05	0.00017	-0.00014	-0.00024
80.88	0.00027	-4e-05	-0.00027	-0.00031
81.12	5e-05	3e-05	-0.00018	-0.0002
81.36	1e-05	1e-05	-0.00028	-0.00021
81.6	7e-05	-8e-05	-0.00025	-0.00026
81.84	2e-05	0	-0.00023	-0.00051
82.08	0.00012	1e-05	-0.00022	-0.00066
82.32	3e-05	-4e-05	-0.00012	-0.00029
82.56	-0.00012	-0.00023	-0.00026	-0.00016
82.8	-4e-05	-9e-05	-0.00034	-0.00014
83.04	4e-05	-0.00011	-0.00019	-0.00018
83.28	0.00013	5e-05	-0.00013	-0.00041
83.52	5e-05	0.00017	-0.00034	-0.00026
83.76	1e-05	9e-05	-0.00022	-0.0005
84	0.0001	-6e-05	-0.00028	-0.00034
84.24	0.00018	-0.00029	-0.00024	-0.00056
84.48	0.00018	-0.00022	-0.00035	-0.0003
84.72	-0.0002	-6e-05	-0.00034	-0.00042
84.96	0.00015	2e-05	-0.00013	-0.00025
85.2	9e-05	5e-05	-0.00012	-0.00031
85.44	-0.00013	-7e-05	-0.00033	-0.00032
85.68	0.00038	7e-05	-0.00018	-0.00029
85.92	0.00025	0.00028	-0.00015	-0.0004
86.16	0.00017	5e-05	-6e-05	-0.0003
86.4	0	-4e-05	-0.0002	-0.00046
86.64	1e-05	-1e-05	-4e-05	-0.00029
86.88	0.00033	-5e-05	-0.00026	-0.00014
87.12	-5e-05	-0.00011	-0.00011	-0.00012
87.36	0.00015	-9e-05	-0.00022	-0.0005
87.6	-3e-05	-5e-05	-0.0004	-0.00019
87.84	0.00017	-4e-05	-0.00021	-0.00035
88.08	0.00021	0.00012	-0.00013	-5e-05
88.32	1e-05	-0.00012	-0.00038	-0.00016
88.56	0.00018	0	-0.00026	-0.00011
88.8	0.00027	-4e-05	-9e-05	-0.00033
89.04	0.00012	-0.0002	-0.00018	-0.00056
89.28	-1e-05	-0.00011	-0.00037	-0.00065
89.52	0.00026	-0.00012	-0.00039	-0.00015
89.76	0.00015	-0.00014	-0.00016	-0.00029
90	0.00021	-4e-05	-0.00024	-0.00037
90.24	-7e-05	-0.00028	-0.00018	-0.00036
90.48	0.0001	-0.00025	-0.00043	-0.00041
90.72	4e-05	-0.00018	-0.00033	-0.00044
90.96	0.00018	4e-05	-0.00031	-0.00029
91.2	-1e-05	-0.00012	-0.00021	-0.00034
91.44	0.00028	-1e-05	-0.0004	-0.00055
91.68	0.00026	9e-05	-0.00029	-0.0005
91.92	0.00013	-0.0002	-0.00026	-0.00031
92.16	6e-05	-0.0001	-0.00034	-0.00028
92.4	0.0001	-8e-05	-0.00036	-0.00036
92.64	5e-05	2e-05	-0.00031	-0.00048
92.88	9e-05	-0.00012	-0.00025	-0.00038
93.12	0	0.00014	-0.00025	-0.00023
93.36	2e-05	-8e-05	-0.00018	-0.00044
93.6	0.00018	-0.00012	-0.0004	-0.00012
93.84	-2e-05	-4e-05	-0.00032	-0.00045
94.08	-1e-05	-3e-05	-0.00045	-0.0004
94.32	0.00031	-0.00023	-0.0003	-0.00023
94.56	0	-3e-05	-0.00033	-0.00017
94.8	0.00021	-0.00012	-0.00025	-0.00037
95.04	4e-05	-0.00013	-0.00037	-0.00053
95.28	6e-05	-7e-05	-0.00016	-0.00014
95.52	9e-05	0	-0.0003	-0.00024
95.76	0.00012	-8e-05	-0.00029	-0.00023
96	0.00022	-6e-05	-0.0002	-0.00039
96.24	0.00017	-0.00011	-0.0002	-0.00024
96.48	0.00024	-8e-05	-0.00028	-0.0004
96.72	0.00011	-4e-05	-0.00029	-0.00039
96.96	0.0001	-0.00016	-0.00022	-0.00042
97.2	-0.00012	-0.00016	-0.00045	-0.00035
97.44	0.00025	6e-05	-0.00044	-0.00039
97.68	0.00011	9e-05	-0.00045	-4e-05
97.92	-4e-05	-0.0001	-0.00036	-0.00023
98.16	4e-05	-0.00011	-0.00048	-0.00017
98.4	-1e-05	-0.00015	-0.0002	-0.00049
98.64	0.00019	-0.00013	-0.00031	-0.0002
98.88	0.00015	-0.00021	-0.00045	-0.00041
99.12	4e-05	-5e-05	-0.00046	-0.00037
99.36	-3e-05	-0.00014	-0.00043	-0.00037
99.6	-0.00011	-7e-05	-0.00039	-0.00059
99.84	6e-05	-0.0001	-0.00031	-0.0004
100.08	0.00016	-4e-05	-0.00022	-0.00044
100.32	0	-6e-05	-0.00035	-0.00028
100.56	0.00027	-0.0001	-0.00025	-0.00039
100.8	8e-05	-8e-05	-0.00037	-0.00044
101.04	0.00028	-0.00017	-0.00016	-0.00055
101.28	0.00023	-0.00012	-0.00031	-0.00052
101.52	0.00023	7e-05	-0.00043	-0.00065
101.76	-0.00014	-0.00029	-0.00038	-0.0004
102	0.00022	-0.00049	-0.00028	-0.00038
102.24	-3e-05	-0.0002	-0.0003	-0.00046
102.48	0.00027	-0.00021	-0.00037	-9e-05
102.72	0.00022	-0.00016	-0.0003	-0.00046
102.96	-5e-05	-0.00019	-0.00011	-0.00018
103.2	7e-05	-0.0001	-0.00031	-0.00049
103.44	0.00014	-0.00011	-0.00037	-0.00048
103.68	5e-05	-3e-05	-0.00031	-0.00023
103.92	0.00017	-0.00016	-0.00032	-4e-05
104.16	0.00013	-6e-05	-0.00031	-0.00046
104.4	5e-05	-1e-05	-0.00035	-0.00045
104.64	-1e-05	-0.00014	-0.0004	-0.00028
104.88	-6e-05	-7e-05	-0.00034	-0.00026
105.12	0.00018	-1e-05	-0.00024	-0.00043
105.36	-8e-05	-0.00024	-0.00044	-0.00013
105.6	-1e-05	-0.00021	-0.00037	-0.00027
105.84	-5e-05	-5e-05	-0.00036	-0.00024
106.08	0.00018	-0.00032	-0.00042	-0.0004
106.32	3e-05	-5e-05	-0.00031	-0.00026
106.56	-2e-05	-0.00011	-0.0002	-0.00017
106.8	-0.00012	-0.00018	-0.00021	-0.00037
107.04	8e-05	0.00016	-0.0002	-0.00029
107.28	-0.00014	-0.00016	-0.00039	-0.00028
107.52	-0.00027	-0.00038	-0.00046	-0.00039
107.76	0.00013	-0.00022	-0.00042	-0.00047
108	6e-05	-5e-05	-0.00045	-0.00045
108.24	0.00015	-6e-05	-0.00039	-0.00025
108.48	0.00021	-0.0001	-0.00041	-0.00012
108.72	5e-05	1e-05	-0.00035	-0.00051
108.96	0.00026	-2e-05	-0.00025	-0.00044
109.2	0.00022	-0.00017	-0.00034	-0.00048
109.44	-0.00012	-0.0001	-0.00031	-0.00051
109.68	-0.00023	0.00012	-0.0004	-0.00025
109.92	1e-05	-3e-05	-0.00034	-0.00039
110.16	0.00015	-5e-05	-0.00039	-0.00053
110.4	2e-05	-0.00014	-0.00024	-0.00047
110.64	-3e-05	-0.00013	-0.00042	-0.00025
110.88	-1e-05	-4e-05	-0.00047	-0.00021
111.12	0.00021	-7e-05	-0.00043	-0.00027
111.36	-1e-05	-3e-05	-0.00048	-0.00034
111.6	-2e-05	-0.0001	-0.0005	-0.00049
111.84	-0.0001	-0.0002	-0.00037	-0.00043
112.08	-0.00012	-0.00012	-0.00047	-0.00025
112.32	1e-05	-0.00012	-0.00026	-0.00057
112.56	-4e-05	7e-05	-0.0004	-0.00037
112.8	-6e-05	-0.00026	-0.00038	-0.00031
113.04	2e-05	-9e-05	-0.00044	-0.00019
113.28	0.0003	-0.00013	-0.00049	-0.00012
113.52	2e-05	0	-0.00041	-0.00038
113.76	0.00018	-0.0003	-0.00038	-0.00055
114	-4e-05	-0.00025	-0.00042	-0.00038
114.24	6e-05	-5e-05	-0.00047	-0.00054
114.48	0	5e-05	-0.0004	-0.00027
114.72	0.00019	-0.00013	-0.00046	-0.00051
114.96	-7e-05	-0.00021	-0.00039	-0.00014
115.2	1e-05	-0.00025	-0.00044	-0.00038
115.44	-2e-05	-0.00011	-0.00039	-0.00039
115.68	5e-05	6e-05	-0.00033	-0.00052
115.92	-6e-05	-0.00012	-0.00043	-0.00032
116.16	-2e-05	-8e-05	-0.00044	-0.00036
116.4	0	-2e-05	-0.00032	-0.00032
116.64	0.00024	-3e-05	-0.00049	-0.00034
116.88	8e-05	-0.00021	-0.00059	-0.00029
117.12	8e-05	-0.00014	-0.00035	-0.00024
117.36	-3e-05	-0.0001	-0.00042	-0.00046
117.6	0.0003	-0.00034	-0.00051	-0.0006
117.84	0.00016	-8e-05	-0.0005	-0.00027
118.08	0.00027	-4e-05	-0.00051	-0.00044
118.32	0.00018	-0.00019	-0.00033	-0.00039
118.56	0.00026	0	-0.00057	-0.00031
118.8	0.0001	-0.0002	-0.00037	-0.00046
119.04	-2e-05	-9e-05	-0.00039	-0.00019
119.28	-9e-05	-0.00035	-0.00039	-0.00029
119.52	0.00012	2e-05	-0.00037	-0.0002
119.76	-1e-05	-0.00034	-0.00045	-0.00043
120	3e-05	-0.00018	-0.00041	-0.00045
120.24	0.00014	-0.00034	-0.00052	-0.00048
120.48	2e-05	-0.0001	-0.00034	-0.00029
120.72	7e-05	-0.00018	-0.00049	-0.00031
120.96	0	-0.00037	-0.00046	-0.00045
121.2	5e-05	-0.00015	-0.00044	-0.00036
121.44	-6e-05	-0.00014	-0.00046	-0.0005
121.68	0.00019	-0.0004	-0.00064	-0.00044
121.92	0.0002	-0.00016	-0.00041	-0.00055
122.16	9e-05	-0.00015	-0.00032	-0.00033
122.4	-7e-05	-0.0002	-0.0003	-0.00047
122.64	-0.00018	-7e-05	-0.00049	-0.00032
122.88	0.00029	-0.00013	-0.00038	-0.00035
123.12	0.00021	-0.0002	-0.00025	-0.00025
123.36	-8e-05	-0.0002	-0.00027	-0.00045
123.6	0.00013	-0.00031	-0.00037	-0.00053
123.84	-0.00016	-7e-05	-0.00044	-0.00044
124.08	6e-05	0	-0.00051	-0.00037
124.32	-1e-05	-9e-05	-0.00057	-0.00053
124.56	2e-05	-0.00017	-0.00044	-0.00053
124.8	0.00011	-0.0002	-0.00052	-0.00059
125.04	5e-05	-1e-05	-0.00035	-0.00043
125.28	-0.00014	-0.00021	-0.00032	-0.00031
125.52	6e-05	-0.00021	-0.00054	-0.00057
125.76	0.00028	-0.00017	-0.00029	-0.00041
126	0.00015	-0.0003	-0.00035	-0.00055
126.24	-8e-05	-5e-05	-0.00038	-0.0004
126.48	-5e-05	-0.00011	-0.00038	-0.0005
126.72	-4e-05	0	-0.00044	-0.00058
126.96	2e-05	-1e-05	-0.00054	-0.00044
127.2	0.0002	-0.00037	-0.00047	-0.00019
127.44	-7e-05	-0.00025	-0.00045	-0.00048
127.68	-1e-05	-0.00029	-0.00049	-0.00037
127.92	9e-05	-8e-05	-0.00041	-0.00073
128.16	-0.0002	8e-05	-0.00034	-0.00044
128.4	0.00023	-0.00035	-0.00045	-0.00034
128.64	0.00035	-0.00012	-0.0005	-0.00024
128.88	-0.00017	-0.00019	-0.00047	-0.00041
129.12	-0.00015	-0.00034	-0.00047	-0.0004
129.36	-1e-05	-0.00026	-0.0005	-0.00051
129.6	3e-05	-2e-05	-0.00059	-0.00049
129.84	5e-05	-0.0002	-0.00038	-0.00038
130.08	1e-05	-0.00013	-0.00044	-0.00019
130.32	-7e-05	-0.00022	-0.00073	-0.00046
130.56	0.00012	-7e-05	-0.00047	-0.00037
130.8	5e-05	-0.00029	-0.00044	-0.00045
131.04	-0.00011	-0.00012	-0.00052	-0.00029
131.28	-9e-05	0	-0.00041	-0.00039
131.52	-5e-05	-0.0002	-0.00041	-0.00079
131.76	-0.00011	-0.00016	-0.00046	-0.00055
132	0.00024	-0.00028	-0.00044	-0.00037
132.24	0.00011	-0.00021	-0.00036	-0.00037
132.48	9e-05	-1e-05	-0.0004	-0.00039
132.72	0	-0.0001	-0.00036	-0.0004
132.96	0.00019	3e-05	-0.00042	-0.00047
133.2	-3e-05	-0.00031	-0.00067	-0.00045
133.44	1e-05	-0.00052	-0.00029	-0.00016
133.68	0.00012	-0.00014	-0.00049	-0.00049
133.92	9e-05	6e-05	-0.00056	-0.00056
134.16	7e-05	-0.00018	-0.00039	-0.0005
134.4	-0.0001	-0.00012	-0.00053	-0.00029
134.64	-5e-05	-4e-05	-0.00049	-0.00055
134.88	0.00022	-0.00014	-0.00042	-0.00065
135.12	0	-2e-05	-0.00052	-0.00065
135.36	3e-05	-5e-05	-0.00053	-0.00051
135.6	-6e-05	-0.00025	-0.00057	-0.00039
135.84	0.00016	-0.00019	-0.00047	-0.00038
136.08	-2e-05	-0.00032	-0.00061	-0.00047
136.32	-6e-05	-4e-05	-0.00045	-0.00042
136.56	0.00014	-2e-05	-0.00061	-0.00056
136.8	-4e-05	-0.00017	-0.00043	-0.00072
137.04	3e-05	-0.0001	-0.0007	-0.00055
137.28	0.00019	-0.00025	-0.00056	-0.00041
137.52	-9e-05	-4e-05	-0.00036	-0.00037
137.76	-0.00011	-0.00014	-0.00043	-0.00033
138	-2e-05	-0.00017	-0.00046	-0.00058
138.24	-3e-05	-0.00035	-0.0005	-0.00066
138.48	-6e-05	-0.0002	-0.00045	-0.00028
138.72	-7e-05	-0.00017	-0.00064	-0.00042
138.96	0.00018	-0.0001	-0.00059	-0.00061
139.2	0.00028	-9e-05	-0.00061	-0.00052
139.44	0.00035	-2e-05	-0.0007	-0.00052
139.68	-5e-05	-0.00022	-0.00046	-0.00058
139.92	-2e-05	-6e-05	-0.00049	-0.00069
140.16	0.0001	-9e-05	-0.00075	-0.00052
140.4	0.00014	-0.0002	-0.00051	-0.0005
140.64	0.0001	-0.00019	-0.00061	-0.00027
140.88	0.00018	-0.00012	-0.0005	-0.00052
141.12	2e-05	-0.00014	-0.00047	-0.00022
141.36	1e-05	-0.00014	-0.00047	-0.00024
141.6	-2e-05	-0.00028	-0.00054	-0.00045
141.84	-4e-05	-0.00039	-0.00066	-0.00065
142.08	0.00014	-0.00018	-0.00045	-0.00051
142.32	8e-05	-0.00012	-0.0006	-0.00062
142.56	0.00014	-0.00029	-0.00039	-0.00074
142.8	-7e-05	-0.00034	-0.0006	-0.00018
143.04	9e-05	-0.00035	-0.00062	-0.00054
143.28	0.00012	-2e-05	-0.00068	-0.00042
143.52	-0.0001	-0.00017	-0.00064	-0.00067
143.76	0	-0.00023	-0.00037	-0.00047
144	0.00026	-0.0004	-0.00045	-0.0005
144.24	9e-05	-0.00024	-0.00064	-0.00047
144.48	3e-05	0	-0.00057	-0.00043
144.72	0.0002	-0.00044	-0.00047	-0.00052
144.96	3e-05	-0.00021	-0.00064	-0.00051
145.2	-4e-05	-7e-05	-0.0006	-0.00058
145.44	0.00023	-0.00022	-0.00051	-0.00046
145.68	0.00016	-0.00022	-0.00056	-0.00038
145.92	0.00013	-0.00025	-0.00075	-0.00038
146.16	4e-05	-0.00012	-0.00071	-0.00054
146.4	0.00011	-0.00037	-0.0006	-0.00057
146.64	-3e-05	-8e-05	-0.00047	-0.0004
146.88	5e-05	-0.00036	-0.00063	-0.00033
147.12	-3e-05	-8e-05	-0.00047	-0.0005
147.36	0.00012	-8e-05	-0.00055	-0.00041
147.6	0.00028	-0.00017	-0.00063	-0.0005
147.84	5e-05	-0.00037	-0.00061	-0.00057
148.08	-0.00013	-0.00024	-0.00058	-0.00024
148.32	3e-05	-7e-05	-0.00049	-0.00064
148.56	0.00017	-0.00044	-0.0006	-0.00045
148.8	0	-0.00016	-0.00071	-0.00062
149.04	0.00017	-0.00018	-0.00053	-0.00065
149.28	-3e-05	-0.00036	-0.00053	-0.00039
149.52	-4e-05	-0.00019	-0.00058	-0.00042
149.76	7e-05	-0.0001	-0.00042	-0.00055
150	-0.00013	-5e-05	-0.00038	-0.00038
150.24	0.00035	-3e-05	-0.00041	-0.0002
150.48	0.00059	9e-05	-0.00034	-0.00015
150.72	-0.00592	-0.00623	-0.0083	-0.00737
150.96	-0.03321	-0.03294	-0.04092	-0.03706
151.2	0.00981	0.01366	0.01113	0.01366
151.44	-0.01121	-0.01064	-0.01455	-0.01255
151.68	0.00128	0.00069	0.0004	0.0004
151.92	0.00121	0.00062	0.00018	0.00038
152.16	0.00127	0.00069	0.00029	0.00032
152.4	0.00154	0.00074	0.00031	0.00041
152.64	0.0017	0.00089	0.00041	0.00052
152.88	0.00167	0.00098	0.0005	0.00072
153.12	0.00156	0.00108	0.0005	0.00096
153.36	0.00159	0.00112	0.00075	0.001
153.6	0.00198	0.00097	0.00075	0.00086
153.84	0.00195	0.00103	0.00083	0.00105
154.08	0.00202	0.00117	0.00071	0.00113
154.32	0.00212	0.00114	0.00094	0.00114
154.56	0.00199	0.0012	0.00089	0.00134
154.8	0.00224	0.00139	0.00105	0.00136
155.04	0.00215	0.00156	0.00102	0.00146
155.28	0.00228	0.00153	0.00121	0.00149
155.52	0.0022	0.00158	0.0011	0.00151
155.76	0.00244	0.00163	0.00126	0.00134
156	0.0026	0.00167	0.00133	0.0016
156.24	0.00283	0.00157	0.00137	0.00148
156.48	0.00261	0.00206	0.00138	0.00176
156.72	0.00267	0.00199	0.0015	0.00177
156.96	0.00269	0.00178	0.00148	0.00159
157.2	0.00259	0.00163	0.00156	0.00178
157.44	0.00276	0.00168	0.00183	0.00181
157.68	0.00265	0.00199	0.00157	0.00186
157.92	0.00257	0.00187	0.0016	0.00194
158.16	0.00278	0.00184	0.00184	0.00172
158.4	0.00279	0.00202	0.00172	0.00188
158.64	0.00281	0.00235	0.00179	0.00196
158.88	0.00278	0.00219	0.00189	0.00204
159.12	0.00278	0.00229	0.00176	0.00186
159.36	0.00283	0.00184	0.00192	0.00204
159.6	0.00297	0.00215	0.00189	0.00216
159.84	0.00289	0.00193	0.00183	0.00219
160.08	0.00296	0.00232	0.00201	0.00203
160.32	0.0028	0.00224	0.00194	0.00232
160.56	0.00274	0.00211	0.00211	0.00205
160.8	0.0031	0.00224	0.00221	0.00228
161.04	0.00293	0.00213	0.00216	0.00191
161.28	0.00304	0.00228	0.0021	0.00225
161.52	0.00301	0.00213	0.00204	0.00241
161.76	0.00322	0.0022	0.00221	0.00232
162	0.00293	0.00217	0.00226	0.00232
162.24	0.00301	0.00235	0.00229	0.0024
162.48	0.00304	0.00234	0.00227	0.00207
162.72	0.00303	0.00221	0.0024	0.00245
162.96	0.00302	0.00249	0.00231	0.00218
163.2	0.00317	0.00238	0.00224	0.00251
163.44	0.0032	0.00229	0.00242	0.00263
163.68	0.0033	0.00228	0.00238	0.00254
163.92	0.00333	0.00229	0.00233	0.00241
164.16	0.00302	0.00231	0.00245	0.00243
164.4	0.00311	0.00249	0.00239	0.00243
164.64	0.0035	0.00264	0.00246	0.00249
164.88	0.00315	0.00256	0.00256	0.00271
165.12	0.00336	0.00256	0.00262	0.00231
165.36	0.00322	0.00254	0.00245	0.00273
165.6	0.00336	0.00268	0.00247	0.00248
165.84	0.00346	0.00235	0.00239	0.00279
166.08	0.0036	0.00243	0.00247	0.00247
166.32	0.00326	0.00256	0.00251	0.00253
166.56	0.00314	0.00264	0.00264	0.00271
166.8	0.00331	0.0026	0.00273	0.0026
167.04	0.00346	0.00266	0.00253	0.00263
167.28	0.00318	0.00251	0.00262	0.00266
167.52	0.00352	0.00287	0.00268	0.00278
167.76	0.00336	0.00277	0.00257	0.00264
168	0.00354	0.00259	0.00263	0.00285
168.24	0.00352	0.00285	0.00272	0.00265
168.48	0.00362	0.00248	0.0027	0.00287
168.72	0.00372	0.00252	0.00263	0.00278
168.96	0.00345	0.00271	0.00262	0.00277
169.2	0.00369	0.00256	0.00271	0.00293
169.44	0.00374	0.00275	0.00269	0.00268
169.68	0.00376	0.00284	0.00273	0.0029
169.92	0.00357	0.00271	0.00284	0.00279
170.16	0.00368	0.00258	0.0028	0.00284
170.4	0.00376	0.00266	0.00288	0.00274
170.64	0.00341	0.00275	0.00286	0.00284
170.88	0.00353	0.00267	0.00277	0.00305
171.12	0.00343	0.00275	0.00273	0.00292
171.36	0.00359	0.0027	0.00284	0.00285
171.6	0.00386	0.00308	0.00307	0.00275
171.84	0.00363	0.00278	0.00284	0.00321
172.08	0.00356	0.00288	0.00299	0.00266
172.32	0.00397	0.00287	0.00281	0.00294
172.56	0.0037	0.00298	0.00294	0.00292
172.8	0.00361	0.0028	0.00296	0.00293
173.04	0.00375	0.00285	0.00292	0.00287
173.28	0.00356	0.00291	0.00304	0.0029
173.52	0.00364	0.00305	0.00294	0.00304
173.76	0.00375	0.00281	0.00301	0.00285
174	0.00361	0.00276	0.00285	0.00323
174.24	0.00375	0.00282	0.00304	0.00287
174.48	0.00376	0.00286	0.00301	0.00317
174.72	0.00368	0.00291	0.00297	0.003
174.96	0.00382	0.00333	0.00321	0.00298
175.2	0.00389	0.00303	0.00296	0.003
175.44	0.00384	0.00304	0.00306	0.00328
175.68	0.00389	0.00299	0.00309	0.00298
175.92	0.00377	0.00318	0.00312	0.00312
176.16	0.0037	0.00266	0.00302	0.003
176.4	0.00389	0.00301	0.00307	0.00298
176.64	0.00372	0.00293	0.00299	0.00306
176.88	0.00393	0.00297	0.00311	0.00303
177.12	0.00367	0.00288	0.00314	0.0031
177.36	0.00415	0.003	0.00312	0.00305
177.6	0.00384	0.00287	0.00317	0.00312
177.84	0.00392	0.00297	0.00316	0.00327
178.08	0.00393	0.00294	0.00329	0.00297
178.32	0.00424	0.0031	0.00327	0.00308
178.56	0.00386	0.00298	0.00313	0.00299
178.8	0.00376	0.0032	0.003	0.00304
179.04	0.00394	0.00307	0.00313	0.0032
179.28	0.00398	0.003	0.00316	0.0032
179.52	0.00358	0.00307	0.0032	0.0034
179.76	0.00411	0.00322	0.00322	0.00329
180	0.00393	0.00314	0.00322	0.00316
180.24	0.00378	0.00299	0.00332	0.00307
180.48	0.00378	0.00312	0.00322	0.00309
180.72	0.00363	0.00329	0.00336	0.00312
180.96	0.00415	0.00322	0.00318	0.0032
181.2	0.00418	0.00302	0.00335	0.00338
181.44	0.00404	0.00337	0.00327	0.00305
181.68	0.00397	0.00305	0.00307	0.00317
181.92	0.00408	0.00309	0.00324	0.00305
182.16	0.00404	0.00309	0.00331	0.00319
182.4	0.00402	0.0031	0.00333	0.00313
182.64	0.00385	0.00323	0.00317	0.00318
182.88	0.00404	0.00327	0.0032	0.00336
183.12	0.00395	0.00297	0.0034	0.00282
183.36	0.00394	0.00326	0.00334	0.00332
183.6	0.00402	0.00297	0.00328	0.00298
183.84	0.00411	0.00299	0.00334	0.00355
184.08	0.0041	0.00308	0.00335	0.00316
184.32	0.004	0.00312	0.0033	0.00331
184.56	0.00399	0.00311	0.00324	0.00327
184.8	0.00408	0.00301	0.00336	0.00331
185.04	0.00391	0.00301	0.00319	0.00305
185.28	0.0039	0.00312	0.00329	0.00341
185.52	0.00413	0.00309	0.00335	0.00336
185.76	0.00394	0.00315	0.00346	0.0032
186	0.00397	0.00308	0.00343	0.00334
186.24	0.00403	0.00311	0.00328	0.00341
186.48	0.00414	0.00307	0.00339	0.00333
186.72	0.00405	0.00332	0.00346	0.00322
186.96	0.00414	0.0031	0.00349	0.00329
187.2	0.00407	0.00311	0.00326	0.00292
187.44	0.00387	0.00294	0.00354	0.0031
187.68	0.00406	0.00317	0.0034	0.00327
187.92	0.0038	0.00331	0.00351	0.00316
188.16	0.00427	0.0032	0.00352	0.00325
188.4	0.00395	0.00317	0.00334	0.0032
188.64	0.00391	0.00315	0.00337	0.00342
188.88	0.0043	0.00306	0.00339	0.00318
189.12	0.0041	0.00305	0.00339	0.00327
189.36	0.00428	0.00339	0.00329	0.00341
189.6	0.0038	0.00308	0.00342	0.00332
189.84	0.00423	0.00317	0.0034	0.00316
190.08	0.00397	0.0031	0.00338	0.00345
190.32	0.00406	0.00332	0.00352	0.00337
190.56	0.00401	0.00319	0.0034	0.00312
190.8	0.00425	0.00298	0.00342	0.00314
191.04	0.00419	0.0034	0.00343	0.00326
191.28	0.00432	0.00323	0.00337	0.00315
191.52	0.00406	0.00324	0.0035	0.00334
191.76	0.00418	0.00326	0.00323	0.00369
192	0.00395	0.00341	0.00341	0.00304
192.24	0.00415	0.00321	0.00339	0.0035
192.48	0.0044	0.00318	0.00346	0.00334
192.72	0.00407	0.00316	0.00344	0.00312
192.96	0.00397	0.00325	0.00355	0.0034
193.2	0.00417	0.00359	0.00351	0.00313
193.44	0.00421	0.0033	0.00349	0.00335
193.68	0.00419	0.00308	0.00342	0.00322
193.92	0.0043	0.0034	0.00347	0.00322
194.16	0.0042	0.00311	0.00353	0.00338
194.4	0.0042	0.00349	0.00347	0.00341
194.64	0.0042	0.00332	0.00351	0.00327
194.88	0.00383	0.0032	0.00357	0.00317
195.12	0.00429	0.00326	0.00359	0.00332
195.36	0.00398	0.00323	0.00356	0.00341
195.6	0.00424	0.00328	0.00363	0.0037
195.84	0.00421	0.00317	0.00354	0.00345
196.08	0.00422	0.00343	0.00355	0.00324
196.32	0.0042	0.0032	0.00349	0.0033
196.56	0.00439	0.00305	0.00354	0.00355
196.8	0.00416	0.0035	0.0035	0.00343
197.04	0.00416	0.00324	0.00368	0.0034
197.28	0.0041	0.00318	0.00359	0.00334
197.52	0.00444	0.0031	0.00354	0.00349
197.76	0.00395	0.00334	0.00366	0.00317
198	0.00435	0.00347	0.00377	0.00341
198.24	0.00398	0.00311	0.00341	0.00359
198.48	0.00429	0.00308	0.00366	0.00342
198.72	0.00416	0.00337	0.00345	0.00316
198.96	0.00416	0.00326	0.00367	0.00321
199.2	0.00411	0.00352	0.00356	0.00372
199.44	0.00416	0.00337	0.00347	0.00327
199.68	0.00421	0.00333	0.00352	0.00354
199.92	0.00419	0.00325	0.00356	0.00338
200.16	0.00421	0.00317	0.00382	0.00317
200.4	0.00439	0.00322	0.00357	0.00318
200.64	0.00431	0.00333	0.00368	0.00361
200.88	0.00418	0.00334	0.00363	0.00338
201.12	0.00434	0.00316	0.00362	0.00342
201.36	0.00436	0.00337	0.00353	0.00341
201.6	0.00412	0.00315	0.00359	0.00348
201.84	0.00419	0.00335	0.0036	0.00329
202.08	0.00418	0.00347	0.0037	0.0036
202.32	0.00414	0.00361	0.00352	0.00354
202.56	0.0042	0.00313	0.00366	0.00314
202.8	0.00398	0.00347	0.0035	0.00341
203.04	0.00414	0.00318	0.00333	0.00368
203.28	0.00434	0.00325	0.00365	0.00334
203.52	0.00423	0.00307	0.00362	0.00344
203.76	0.00419	0.00309	0.00362	0.00341
204	0.00384	0.00355	0.00365	0.00331
204.24	0.004	0.0034	0.00367	0.00327
204.48	0.00412	0.00338	0.00364	0.00328
204.72	0.00417	0.00317	0.00363	0.00334
204.96	0.00416	0.00312	0.00368	0.00323
205.2	0.00415	0.00338	0.00368	0.00316
205.44	0.00408	0.00324	0.00369	0.00331
205.68	0.00408	0.00356	0.00356	0.00328
205.92	0.00391	0.00336	0.00357	0.00329
206.16	0.00422	0.00338	0.00381	0.00334
206.4	0.00425	0.00324	0.00368	0.00328
206.64	0.00437	0.0036	0.00356	0.0032
206.88	0.00422	0.00333	0.0036	0.00325
207.12	0.0042	0.00337	0.00347	0.00349
207.36	0.00399	0.0031	0.00371	0.00322
207.6	0.00407	0.00344	0.00359	0.00337
207.84	0.00433	0.00348	0.00358	0.00321
208.08	0.00413	0.00338	0.00348	0.00372
208.32	0.00406	0.00337	0.0036	0.00312
208.56	0.00396	0.00324	0.00367	0.0035
208.8	0.00421	0.00318	0.00368	0.0033
209.04	0.00421	0.0033	0.00371	0.00326
209.28	0.00412	0.00308	0.00371	0.00346
209.52	0.00421	0.00326	0.00364	0.00359
209.76	0.00428	0.00336	0.00356	0.00321
210	0.00427	0.00329	0.00364	0.00332
210.24	0.00439	0.00327	0.0038	0.00334
210.48	0.00409	0.00321	0.00364	0.00328
210.72	0.00403	0.00325	0.00354	0.0032
210.96	0.00417	0.00328	0.00365	0.00364
211.2	0.00406	0.00335	0.00356	0.00339
211.44	0.00411	0.00342	0.0036	0.00373
211.68	0.00428	0.00338	0.00361	0.00367
211.92	0.0043	0.00316	0.00364	0.00349
212.16	0.00415	0.00321	0.00354	0.00344
212.4	0.00403	0.00318	0.00383	0.00357
212.64	0.00403	0.00316	0.00375	0.00354
212.88	0.00424	0.0033	0.00362	0.00322
213.12	0.00421	0.00326	0.00358	0.00334
213.36	0.00435	0.00327	0.00355	0.0032
213.6	0.00408	0.00314	0.00357	0.00333
213.84	0.00404	0.00332	0.00348	0.00292
214.08	0.00432	0.00319	0.00368	0.00353
214.32	0.00415	0.0031	0.0036	0.00335
214.56	0.00392	0.00307	0.00361	0.00335
214.8	0.00408	0.00316	0.00364	0.00335
215.04	0.00424	0.0033	0.0038	0.00317
215.28	0.00417	0.00324	0.00373	0.0034
215.52	0.00426	0.0031	0.00372	0.00315
215.76	0.00439	0.00333	0.00376	0.00361
216	0.00395	0.00313	0.00363	0.00325
216.24	0.00406	0.00342	0.00362	0.00322
216.48	0.00412	0.00323	0.00354	0.00355
216.72	0.00416	0.00301	0.0035	0.00345
216.96	0.00445	0.00321	0.0036	0.00338
217.2	0.00415	0.0032	0.0036	0.00317
217.44	0.00439	0.00358	0.0037	0.00327
217.68	0.00399	0.00323	0.00369	0.00326
217.92	0.0041	0.0034	0.00377	0.00339
218.16	0.00398	0.00322	0.00356	0.00333
218.4	0.00388	0.00324	0.00369	0.00328
218.64	0.0042	0.00329	0.0036	0.00318
218.88	0.00415	0.0032	0.0037	0.00316
219.12	0.004	0.00317	0.00346	0.00335
219.36	0.00434	0.00313	0.00358	0.00343
219.6	0.00424	0.00338	0.00348	0.00331
219.84	0.00432	0.0033	0.00354	0.00324
220.08	0.00419	0.00313	0.00364	0.00345
220.32	0.00414	0.00355	0.00367	0.00342
220.56	0.00408	0.00356	0.00361	0.00319
220.8	0.0042	0.00284	0.00366	0.00333
221.04	0.00401	0.00321	0.00349	0.00342
221.28	0.00432	0.00329	0.0037	0.00334
221.52	0.00418	0.00334	0.00375	0.00345
221.76	0.00394	0.00313	0.00355	0.00341
222	0.00406	0.00344	0.00366	0.00331
222.24	0.00416	0.00338	0.00358	0.00342
222.48	0.00393	0.00341	0.00381	0.0031
222.72	0.00421	0.00313	0.00361	0.00305
222.96	0.00425	0.00325	0.00369	0.0034
223.2	0.00389	0.00328	0.0037	0.00315
223.44	0.00429	0.00343	0.00365	0.00347
223.68	0.00426	0.00332	0.00351	0.00342
223.92	0.00428	0.00306	0.00375	0.00323
224.16	0.00401	0.00342	0.00368	0.00317
224.4	0.00435	0.00338	0.00354	0.00334
224.64	0.00405	0.00302	0.00376	0.00341
224.88	0.0043	0.00302	0.00356	0.0033
225.12	0.00408	0.00319	0.00365	0.00352
225.36	0.00412	0.00357	0.00368	0.0033
225.6	0.00446	0.00321	0.00355	0.0031
225.84	0.00388	0.0031	0.00378	0.00347
226.08	0.0042	0.00323	0.00357	0.00333
226.32	0.00405	0.00311	0.00376	0.00342
226.56	0.00427	0.00329	0.00355	0.00352
226.8	0.00414	0.0032	0.00363	0.00338
227.04	0.00412	0.00315	0.00364	0.00328
227.28	0.00424	0.00343	0.00365	0.00326
227.52	0.00413	0.00315	0.00374	0.00345
227.76	0.00439	0.00315	0.00357	0.00338
228	0.0043	0.00323	0.00356	0.00339
228.24	0.00451	0.00326	0.00354	0.0036
228.48	0.00409	0.00335	0.00374	0.00329
228.72	0.0041	0.0031	0.00357	0.00298
228.96	0.00393	0.00321	0.00364	0.00347
229.2	0.00401	0.00304	0.00379	0.00326
229.44	0.00418	0.00303	0.00353	0.00341
229.68	0.00426	0.00316	0.00372	0.00339
229.92	0.00407	0.00325	0.00355	0.00343
230.16	0.00414	0.00301	0.00356	0.00315
230.4	0.004	0.00343	0.00353	0.00368
230.64	0.00409	0.00344	0.00366	0.00326
230.88	0.00432	0.00284	0.00347	0.00302
231.12	0.00404	0.00315	0.0035	0.00348
231.36	0.00432	0.00314	0.00349	0.00334
231.6	0.00413	0.00328	0.00365	0.00329
231.84	0.0042	0.00355	0.00356	0.00312
232.08	0.00398	0.00332	0.0036	0.00325
232.32	0.00397	0.00319	0.00349	0.00313
232.56	0.00426	0.00319	0.0037	0.00307
232.8	0.00437	0.00317	0.0037	0.0032
233.04	0.00415	0.0034	0.00373	0.0031
233.28	0.00431	0.00337	0.00367	0.0035
233.52	0.00443	0.00335	0.0035	0.00344
233.76	0.00393	0.00297	0.00364	0.00329
234	0.00444	0.00349	0.00348	0.00324
234.24	0.00404	0.00312	0.00367	0.00313
234.48	0.00423	0.00318	0.00353	0.00339
234.72	0.00402	0.00318	0.00357	0.00341
234.96	0.00418	0.00322	0.00372	0.00338
235.2	0.00445	0.00325	0.00385	0.00338
235.44	0.00418	0.00302	0.00364	0.003
235.68	0.00406	0.00334	0.00354	0.00311
235.92	0.00396	0.00309	0.00343	0.00319
236.16	0.00423	0.00312	0.00362	0.00324
236.4	0.00403	0.00306	0.00377	0.0033
236.64	0.0042	0.00323	0.0036	0.00313
236.88	0.00406	0.00304	0.00369	0.00303
237.12	0.00424	0.00321	0.00347	0.00321
237.36	0.00405	0.00327	0.00359	0.00316
237.6	0.0041	0.00331	0.00342	0.00325
237.84	0.00421	0.00315	0.00341	0.00335
238.08	0.00435	0.00331	0.00362	0.00311
238.32	0.00411	0.00333	0.0037	0.00345
238.56	0.0043	0.00308	0.00361	0.00317
238.8	0.00388	0.00327	0.00349	0.00337
239.04	0.00434	0.00305	0.00361	0.00322
239.28	0.00398	0.00332	0.00339	0.0032
239.52	0.00395	0.00343	0.00343	0.00307
239.76	0.00405	0.00317	0.00373	0.0031

## Sheet: AGS1
Time	Exp1	Exp2	Exp3	Exp4
0	-2e-05	0.00018	0	9e-05
0.24	3e-05	7e-05	0.00014	-6e-05
0.48	1e-05	-5e-05	2e-05	-8e-05
0.72	-0.00019	-0.0001	-2e-05	-3e-05
0.96	0	0	2e-05	4e-05
1.2	-0.0002	0.00012	1e-05	5e-05
1.44	-4e-05	0.00032	0.00014	0.00012
1.68	-0.00014	0.00018	-2e-05	0.00021
1.92	5e-05	-8e-05	0.0001	9e-05
2.16	-2e-05	0.00015	8e-05	-1e-05
2.4	-4e-05	-5e-05	1e-05	3e-05
2.64	-0.00014	0.0001	3e-05	-2e-05
2.88	-4e-05	-7e-05	9e-05	5e-05
3.12	3e-05	3e-05	-8e-05	-0.00012
3.36	2e-05	0	3e-05	3e-05
3.6	-0.00026	8e-05	7e-05	-0.00023
3.84	-0.0001	-0.00018	7e-05	-3e-05
4.08	0	8e-05	7e-05	0
4.32	-0.00013	8e-05	-5e-05	3e-05
4.56	-5e-05	6e-05	5e-05	9e-05
4.8	2e-05	-6e-05	3e-05	-1e-05
5.04	0	0.00019	0.00013	0
5.28	-0.00016	4e-05	-2e-05	9e-05
5.52	-5e-05	0.00011	7e-05	-3e-05
5.76	-8e-05	-2e-05	9e-05	-2e-05
6	-0.00018	-0.00014	-2e-05	-2e-05
6.24	3e-05	0.00018	0.00016	0
6.48	-9e-05	6e-05	8e-05	-0.00022
6.72	9e-05	-0.00019	1e-05	-3e-05
6.96	-0.00018	0.0001	5e-05	-6e-05
7.2	0	-0.00015	4e-05	-3e-05
7.44	-6e-05	-0.00013	-3e-05	-2e-05
7.68	-0.0001	-0.00011	4e-05	-3e-05
7.92	-0.00019	-0.00013	6e-05	0.00013
8.16	3e-05	-5e-05	6e-05	-3e-05
8.4	-1e-05	0	-3e-05	2e-05
8.64	-7e-05	0	2e-05	5e-05
8.88	-5e-05	0.00011	-1e-05	2e-05
9.12	0.00017	6e-05	0	3e-05
9.36	0.0001	-4e-05	3e-05	-4e-05
9.6	-9e-05	3e-05	0.00014	0.00014
9.84	-1e-05	0.0001	6e-05	-6e-05
10.08	0.00013	0	4e-05	0.00018
10.32	-0.00013	5e-05	-7e-05	3e-05
10.56	0.00013	3e-05	-9e-05	0.00014
10.8	-8e-05	0	0	6e-05
11.04	-3e-05	0	0.00018	-0.00015
11.28	3e-05	-4e-05	-0.0001	0.00011
11.52	-7e-05	2e-05	-2e-05	6e-05
11.76	0	0.00012	3e-05	-1e-05
12	4e-05	-3e-05	-7e-05	6e-05
12.24	-9e-05	6e-05	0	-0.00013
12.48	-8e-05	2e-05	-4e-05	0.00011
12.72	6e-05	0.00017	1e-05	1e-05
12.96	3e-05	0.0001	-0.00012	-0.00032
13.2	1e-05	2e-05	-1e-05	-5e-05
13.44	2e-05	0.00013	-4e-05	-4e-05
13.68	-3e-05	9e-05	-9e-05	-8e-05
13.92	0.00016	-6e-05	1e-05	4e-05
14.16	3e-05	-3e-05	9e-05	-0.00012
14.4	2e-05	8e-05	8e-05	7e-05
14.64	0.00012	6e-05	-0.00014	-1e-05
14.88	-0.0001	0.0001	6e-05	-1e-05
15.12	5e-05	-0.00025	2e-05	6e-05
15.36	-0.0001	-0.00018	-6e-05	-3e-05
15.6	0.00011	9e-05	3e-05	-9e-05
15.84	-2e-05	4e-05	-2e-05	-0.0001
16.08	9e-05	0.00013	9e-05	0
16.32	0.00018	-3e-05	-6e-05	0.00013
16.56	-2e-05	-9e-05	-4e-05	1e-05
16.8	6e-05	1e-05	-6e-05	8e-05
17.04	0.00018	1e-05	-6e-05	5e-05
17.28	8e-05	-0.00012	-3e-05	-4e-05
17.52	-7e-05	-6e-05	8e-05	-2e-05
17.76	-7e-05	7e-05	1e-05	0.00018
18	1e-05	-7e-05	-4e-05	7e-05
18.24	-8e-05	-0.00014	-2e-05	8e-05
18.48	-5e-05	-0.00018	5e-05	2e-05
18.72	-4e-05	5e-05	-1e-05	-0.00013
18.96	7e-05	-7e-05	6e-05	4e-05
19.2	0.0001	-0.0001	-2e-05	4e-05
19.44	-4e-05	9e-05	6e-05	0.00012
19.68	7e-05	-8e-05	6e-05	-9e-05
19.92	0.00013	-1e-05	4e-05	-0.00016
20.16	-5e-05	7e-05	0.00012	-7e-05
20.4	-6e-05	-7e-05	5e-05	0
20.64	0.0001	-0.00019	-0.0002	4e-05
20.88	0.00014	-4e-05	7e-05	-0.00025
21.12	-7e-05	-0.0001	-0.00014	-0.00024
21.36	-4e-05	7e-05	-0.00011	0.00011
21.6	0.00022	-0.00016	-1e-05	6e-05
21.84	8e-05	-3e-05	0.0001	0.00011
22.08	6e-05	2e-05	-0.00013	1e-05
22.32	-1e-05	-1e-05	0.00014	-6e-05
22.56	-6e-05	5e-05	-0.00016	-0.00017
22.8	-5e-05	3e-05	-5e-05	6e-05
23.04	0.00012	-7e-05	-9e-05	0
23.28	1e-05	-0.00026	4e-05	-0.0001
23.52	7e-05	-2e-05	0.00016	7e-05
23.76	0.0001	-0.00013	2e-05	0.00012
24	-3e-05	-5e-05	-6e-05	0
24.24	-9e-05	-9e-05	-8e-05	0.00016
24.48	2e-05	-0.00013	-7e-05	0.0001
24.72	-1e-05	4e-05	7e-05	6e-05
24.96	9e-05	8e-05	-0.0001	-5e-05
25.2	0.00012	4e-05	-2e-05	-8e-05
25.44	7e-05	9e-05	-8e-05	9e-05
25.68	3e-05	-0.00011	-5e-05	0.00016
25.92	-0.00011	-3e-05	-0.00017	-1e-05
26.16	9e-05	9e-05	-0.00014	5e-05
26.4	0.00014	-8e-05	4e-05	-0.00013
26.64	0	4e-05	-0.00013	3e-05
26.88	7e-05	3e-05	0.00012	2e-05
27.12	4e-05	-8e-05	-2e-05	-7e-05
27.36	9e-05	0.00012	-7e-05	-9e-05
27.6	-2e-05	3e-05	-8e-05	-5e-05
27.84	0.00015	-0.00013	-6e-05	-8e-05
28.08	-1e-05	6e-05	-0.00015	2e-05
28.32	0.00017	3e-05	-7e-05	-0.0001
28.56	-4e-05	1e-05	-0.00012	0.00012
28.8	-5e-05	-1e-05	-4e-05	-9e-05
29.04	-5e-05	7e-05	4e-05	-0.00023
29.28	7e-05	-1e-05	-7e-05	-1e-05
29.52	0.00016	-9e-05	-6e-05	-9e-05
29.76	-6e-05	7e-05	-2e-05	-6e-05
30	0.00027	0.00012	2e-05	0.0003
30.24	0.00025	0.0005	0.00016	8e-05
30.48	0.00035	0.00034	0.00021	0.00018
30.72	-0.00616	-0.00721	-0.0071	-0.00721
30.96	-0.0362	-0.04075	-0.03992	-0.04101
31.2	0.00837	0.01251	0.01103	0.0121
31.44	-0.01233	-0.01401	-0.01376	-0.01392
31.68	0.00015	0.00037	0.00053	0.00024
31.92	1e-05	0.00028	0.00037	0.00019
32.16	0.00022	0.00034	0.00041	0.00038
32.4	0.00021	1e-05	0.00046	0.00037
32.64	2e-05	0.00031	0.00038	0.00041
32.88	5e-05	0.00023	0.00035	0.00038
33.12	0.00024	0.00027	0.00059	0.00056
33.36	-2e-05	0.00017	0.00063	0.00074
33.6	0.00011	0.00045	0.00064	0.00062
33.84	9e-05	0.00018	0.00089	0.00062
34.08	0.00027	0.00036	0.00063	0.00084
34.32	0.00014	0.00027	0.0008	0.001
34.56	0.00028	0.00039	0.00082	0.00084
34.8	0.00055	0.00051	0.00107	0.00093
35.04	0.00031	0.00065	0.00121	0.00101
35.28	0.00048	0.00053	0.00109	0.00096
35.52	0.00048	0.0005	0.00119	0.00104
35.76	0.00046	0.00072	0.00138	0.00122
36	0.00037	0.00052	0.00137	0.00124
36.24	0.00047	0.00064	0.00142	0.00128
36.48	0.00064	0.00064	0.00131	0.00151
36.72	0.00036	0.00079	0.00151	0.00147
36.96	0.00035	0.00092	0.00155	0.00139
37.2	0.00043	0.00083	0.0016	0.00156
37.44	0.00066	0.00092	0.00172	0.00157
37.68	0.00059	0.00099	0.00185	0.0014
37.92	0.00044	0.00094	0.0018	0.00181
38.16	0.00059	0.00089	0.00201	0.0017
38.4	0.00053	0.00091	0.00199	0.00173
38.64	0.00056	0.00108	0.00199	0.00196
38.88	0.00078	0.00111	0.00193	0.00184
39.12	0.00062	0.00103	0.00219	0.00181
39.36	0.00084	0.00121	0.00205	0.00182
39.6	0.00075	0.00124	0.00216	0.00194
39.84	0.00079	0.00134	0.00232	0.002
40.08	0.00079	0.0012	0.0024	0.00192
40.32	0.00073	0.00137	0.00232	0.00196
40.56	0.00079	0.00131	0.00243	0.00213
40.8	0.00077	0.00146	0.00259	0.00211
41.04	0.00087	0.00126	0.00234	0.00224
41.28	0.00086	0.00134	0.00244	0.00228
41.52	0.00092	0.00146	0.00258	0.00229
41.76	0.00083	0.00157	0.00249	0.00234
42	0.00102	0.00163	0.0027	0.00229
42.24	0.00071	0.00153	0.00253	0.00258
42.48	0.00088	0.00169	0.00269	0.00255
42.72	0.00103	0.00168	0.00273	0.00252
42.96	0.00102	0.00156	0.00274	0.00249
43.2	0.00111	0.00185	0.0028	0.0027
43.44	0.00104	0.00185	0.00279	0.00262
43.68	0.00104	0.00167	0.00284	0.00273
43.92	0.00127	0.00175	0.00279	0.00276
44.16	0.00109	0.00185	0.00287	0.00278
44.4	0.00121	0.00183	0.0031	0.0027
44.64	0.0011	0.0019	0.0031	0.00289
44.88	0.00104	0.00181	0.00309	0.0029
45.12	0.00125	0.00192	0.00292	0.00279
45.36	0.00125	0.00182	0.00308	0.00283
45.6	0.00111	0.00211	0.00317	0.00296
45.84	0.00129	0.00204	0.00312	0.00282
46.08	0.00115	0.00195	0.00332	0.00302
46.32	0.00116	0.00208	0.0032	0.00319
46.56	0.00117	0.00208	0.00318	0.00299
46.8	0.00123	0.00196	0.00331	0.00294
47.04	0.0013	0.00218	0.00313	0.00305
47.28	0.00128	0.00206	0.00323	0.00294
47.52	0.00123	0.00221	0.00336	0.00301
47.76	0.00133	0.0023	0.00319	0.00311
48	0.00142	0.00224	0.00341	0.00311
48.24	0.00127	0.00234	0.00326	0.00326
48.48	0.00146	0.00213	0.00334	0.00327
48.72	0.0015	0.00232	0.00342	0.00336
48.96	0.00145	0.00222	0.00338	0.00317
49.2	0.00137	0.00218	0.00351	0.00311
49.44	0.00148	0.00234	0.0035	0.00328
49.68	0.00149	0.00247	0.00341	0.00327
49.92	0.00161	0.00241	0.00336	0.00357
50.16	0.00128	0.00225	0.00358	0.00347
50.4	0.00147	0.00227	0.00352	0.00308
50.64	0.00149	0.00226	0.00356	0.00343
50.88	0.00145	0.00247	0.00354	0.0035
51.12	0.00154	0.00239	0.00366	0.00336
51.36	0.0015	0.00244	0.00368	0.00352
51.6	0.0014	0.00236	0.0036	0.00329
51.84	0.00164	0.00236	0.00364	0.00341
52.08	0.00158	0.00244	0.00363	0.00348
52.32	0.00156	0.00245	0.0037	0.00343
52.56	0.00156	0.00257	0.00359	0.00336
52.8	0.00152	0.0026	0.0037	0.00344
53.04	0.00169	0.00242	0.00363	0.00363
53.28	0.00173	0.00249	0.00375	0.00343
53.52	0.00182	0.00274	0.00375	0.00393
53.76	0.00177	0.00255	0.00379	0.00363
54	0.00161	0.00257	0.00381	0.00354
54.24	0.00169	0.0025	0.00363	0.00357
54.48	0.00173	0.00251	0.00385	0.00374
54.72	0.00172	0.00255	0.00393	0.00353
54.96	0.00172	0.00271	0.0038	0.00363
55.2	0.0016	0.00258	0.00392	0.0036
55.44	0.00162	0.00264	0.00383	0.00379
55.68	0.00171	0.00256	0.00391	0.00356
55.92	0.00176	0.00244	0.0039	0.00364
56.16	0.00173	0.00253	0.00388	0.00374
56.4	0.00182	0.00281	0.00401	0.00365
56.64	0.00182	0.00257	0.00387	0.0037
56.88	0.00179	0.00275	0.004	0.0037
57.12	0.00164	0.0028	0.00394	0.00358
57.36	0.00163	0.00278	0.00385	0.00366
57.6	0.00202	0.00282	0.00387	0.0038
57.84	0.00203	0.00261	0.00388	0.00379
58.08	0.00193	0.00273	0.00399	0.0036
58.32	0.00183	0.0028	0.00391	0.00384
58.56	0.00193	0.00286	0.00397	0.00345
58.8	0.00189	0.00271	0.00397	0.00391
59.04	0.00174	0.00286	0.00402	0.00377
59.28	0.00194	0.00262	0.00406	0.00387
59.52	0.00192	0.00257	0.00403	0.00373
59.76	0.00194	0.00286	0.00413	0.0037
60	0.00187	0.00279	0.00403	0.00374
60.24	0.00199	0.00273	0.00403	0.00375
60.48	0.00214	0.00293	0.004	0.00368
60.72	0.002	0.0028	0.00415	0.00381
60.96	0.00192	0.00294	0.00412	0.00378
61.2	0.00183	0.00272	0.00403	0.00384
61.44	0.00214	0.00281	0.00406	0.00359
61.68	0.00194	0.00275	0.00412	0.0038
61.92	0.00195	0.00281	0.00402	0.00376
62.16	0.0019	0.00281	0.00415	0.00383
62.4	0.00201	0.00274	0.00399	0.00377
62.64	0.00212	0.00264	0.00418	0.00386
62.88	0.00187	0.00293	0.00401	0.00388
63.12	0.00193	0.00274	0.00415	0.00371
63.36	0.00198	0.00288	0.00413	0.00392
63.6	0.00181	0.00292	0.0042	0.00377
63.84	0.00203	0.00288	0.00405	0.00393
64.08	0.00218	0.00294	0.00428	0.00397
64.32	0.00217	0.00285	0.00418	0.00391
64.56	0.00187	0.00294	0.00425	0.00384
64.8	0.00189	0.00286	0.00426	0.00394
65.04	0.00205	0.00275	0.00412	0.00402
65.28	0.00206	0.00304	0.00413	0.00383
65.52	0.00201	0.00293	0.00407	0.00411
65.76	0.00203	0.0029	0.00436	0.004
66	0.00191	0.00286	0.00428	0.00408
66.24	0.00208	0.00292	0.00435	0.00401
66.48	0.00214	0.00302	0.00419	0.00402
66.72	0.00202	0.00285	0.00423	0.00402
66.96	0.00211	0.00298	0.00425	0.00395
67.2	0.002	0.00317	0.00435	0.00413
67.44	0.00207	0.00298	0.00422	0.00377
67.68	0.00214	0.00317	0.00433	0.00392
67.92	0.00211	0.00295	0.00429	0.00397
68.16	0.00209	0.00295	0.0042	0.0039
68.4	0.00203	0.00287	0.00428	0.00402
68.64	0.00224	0.0029	0.00428	0.00405
68.88	0.00202	0.00299	0.0042	0.00389
69.12	0.002	0.00296	0.00414	0.004
69.36	0.00215	0.00289	0.00433	0.00417
69.6	0.00231	0.00301	0.00428	0.00381
69.84	0.00202	0.00294	0.0043	0.0039
70.08	0.00226	0.00306	0.00424	0.00411
70.32	0.00207	0.00299	0.00418	0.00398
70.56	0.00208	0.0031	0.00426	0.00403
70.8	0.00223	0.00319	0.00414	0.00387
71.04	0.00211	0.00326	0.00425	0.00411
71.28	0.0022	0.003	0.00436	0.00398
71.52	0.00216	0.00298	0.00429	0.00401
71.76	0.00202	0.00306	0.00446	0.00391
72	0.00208	0.00296	0.00436	0.00411
72.24	0.00213	0.00294	0.00438	0.00399
72.48	0.00205	0.00285	0.00448	0.0042
72.72	0.00215	0.00277	0.00444	0.00409
72.96	0.00214	0.00294	0.00437	0.00404
73.2	0.00214	0.00305	0.00432	0.00405
73.44	0.00207	0.00328	0.00442	0.00404
73.68	0.00233	0.00314	0.00417	0.00425
73.92	0.00213	0.00311	0.00415	0.00396
74.16	0.00219	0.00311	0.00423	0.00414
74.4	0.00239	0.00284	0.00422	0.00418
74.64	0.00219	0.00303	0.00441	0.00425
74.88	0.00217	0.00295	0.00443	0.00404
75.12	0.00226	0.00301	0.00452	0.00408
75.36	0.00225	0.00304	0.00432	0.00402
75.6	0.00217	0.00308	0.00442	0.00403
75.84	0.00228	0.00314	0.00434	0.00403
76.08	0.00243	0.00315	0.00442	0.00426
76.32	0.00232	0.0031	0.00434	0.00409
76.56	0.00225	0.00291	0.00447	0.00422
76.8	0.00231	0.00295	0.00451	0.00393
77.04	0.00245	0.00303	0.00447	0.00407
77.28	0.00233	0.00294	0.00441	0.00403
77.52	0.00227	0.00314	0.00448	0.004
77.76	0.0023	0.00297	0.00439	0.00408
78	0.00231	0.00303	0.00452	0.00424
78.24	0.00231	0.00297	0.00433	0.00412
78.48	0.00222	0.00295	0.00461	0.00421
78.72	0.00233	0.00312	0.00466	0.00392
78.96	0.00222	0.00314	0.00437	0.00407
79.2	0.00225	0.00298	0.00437	0.00425
79.44	0.00222	0.00309	0.00453	0.00416
79.68	0.00233	0.00308	0.00439	0.00417
79.92	0.00213	0.00291	0.00442	0.00404
80.16	0.00225	0.00322	0.00439	0.00402
80.4	0.00225	0.00313	0.00454	0.00413
80.64	0.00217	0.0031	0.00439	0.00413
80.88	0.00245	0.0031	0.00436	0.00425
81.12	0.00223	0.0032	0.00442	0.00406
81.36	0.00229	0.00296	0.0044	0.00416
81.6	0.00221	0.00316	0.00441	0.0042
81.84	0.00235	0.00312	0.00451	0.0043
82.08	0.00234	0.00299	0.00455	0.00391
82.32	0.0023	0.00307	0.00438	0.00409
82.56	0.00232	0.00301	0.00432	0.00416
82.8	0.00229	0.0031	0.00445	0.00419
83.04	0.0022	0.00311	0.00443	0.00428
83.28	0.00233	0.00302	0.00444	0.00416
83.52	0.00216	0.00314	0.00448	0.00409
83.76	0.00237	0.00317	0.00456	0.00415
84	0.00214	0.00323	0.00457	0.00406
84.24	0.00245	0.00297	0.00462	0.00409
84.48	0.00228	0.0031	0.00445	0.00416
84.72	0.00243	0.00298	0.00452	0.00402
84.96	0.00222	0.00313	0.00457	0.00407
85.2	0.00217	0.00311	0.0045	0.00414
85.44	0.00249	0.00316	0.00452	0.00399
85.68	0.00222	0.00349	0.00456	0.00431
85.92	0.00228	0.00308	0.0045	0.00411
86.16	0.00228	0.00306	0.00451	0.0041
86.4	0.00235	0.00318	0.00455	0.00427
86.64	0.00229	0.00306	0.00448	0.00415
86.88	0.00247	0.00316	0.00454	0.0041
87.12	0.00222	0.0033	0.00433	0.00413
87.36	0.00236	0.00307	0.00448	0.00411
87.6	0.00246	0.00317	0.00463	0.00425
87.84	0.00233	0.00326	0.00444	0.00436
88.08	0.00223	0.00299	0.00452	0.00412
88.32	0.00229	0.00324	0.00449	0.00404
88.56	0.00245	0.00307	0.00455	0.00427
88.8	0.00244	0.00311	0.00463	0.00409
89.04	0.00258	0.00312	0.00455	0.00451
89.28	0.00252	0.00322	0.00449	0.00414
89.52	0.00234	0.0032	0.00447	0.00415
89.76	0.00245	0.00314	0.00451	0.0043
90	0.00237	0.00315	0.00448	0.00417
90.24	0.00231	0.0031	0.00455	0.00422
90.48	0.0024	0.00328	0.00444	0.00391
90.72	0.0023	0.00339	0.00473	0.00413
90.96	0.00258	0.00323	0.00454	0.00417
91.2	0.00234	0.00327	0.00466	0.00432
91.44	0.00244	0.0031	0.00462	0.00414
91.68	0.00248	0.00327	0.00447	0.00409
91.92	0.00226	0.00296	0.00461	0.00437
92.16	0.00244	0.00318	0.0047	0.00418
92.4	0.00231	0.00312	0.00454	0.00398
92.64	0.00241	0.00339	0.00449	0.00421
92.88	0.00235	0.00315	0.00456	0.0041
93.12	0.00255	0.00318	0.0045	0.00409
93.36	0.00235	0.0032	0.00464	0.00411
93.6	0.00239	0.00312	0.00459	0.00422
93.84	0.00247	0.00291	0.00458	0.00423
94.08	0.00246	0.00331	0.00467	0.004
94.32	0.00227	0.00323	0.00456	0.0041
94.56	0.00226	0.00315	0.00464	0.00411
94.8	0.00247	0.00317	0.00459	0.00416
95.04	0.00231	0.00323	0.00471	0.00408
95.28	0.00239	0.00313	0.00455	0.0042
95.52	0.00251	0.00326	0.0047	0.00432
95.76	0.0024	0.00324	0.00442	0.00429
96	0.00254	0.00304	0.00461	0.00405
96.24	0.00223	0.00306	0.00461	0.00406
96.48	0.00248	0.00328	0.00472	0.00421
96.72	0.00251	0.00321	0.00453	0.00407
96.96	0.00246	0.00321	0.00458	0.00443
97.2	0.00246	0.00314	0.00456	0.00412
97.44	0.0024	0.00304	0.00455	0.00413
97.68	0.00226	0.00306	0.00466	0.00413
97.92	0.00233	0.00315	0.00457	0.00405
98.16	0.00233	0.00316	0.00456	0.00419
98.4	0.00242	0.00316	0.00463	0.00407
98.64	0.00246	0.00308	0.00469	0.00414
98.88	0.00232	0.00319	0.00467	0.00445
99.12	0.00239	0.00305	0.00453	0.00421
99.36	0.00252	0.0031	0.0046	0.00423
99.6	0.00238	0.00333	0.0046	0.00421
99.84	0.00245	0.00306	0.00465	0.0043
100.08	0.00224	0.00324	0.00455	0.00418
100.32	0.0025	0.00305	0.00451	0.00427
100.56	0.00242	0.00332	0.00462	0.00409
100.8	0.00259	0.00325	0.00449	0.00424
101.04	0.00246	0.00324	0.00461	0.0041
101.28	0.0024	0.00334	0.0046	0.00414
101.52	0.00236	0.00348	0.00466	0.00417
101.76	0.00237	0.00305	0.00468	0.00415
102	0.00251	0.00312	0.00479	0.00417
102.24	0.00256	0.00333	0.00467	0.00419
102.48	0.00236	0.00331	0.00463	0.00415
102.72	0.00246	0.00316	0.00484	0.00396
102.96	0.00235	0.00332	0.0047	0.00423
103.2	0.00249	0.00303	0.0047	0.00406
103.44	0.0025	0.00324	0.00467	0.00427
103.68	0.00237	0.00321	0.00466	0.00408
103.92	0.00245	0.00331	0.00462	0.004
104.16	0.00225	0.00307	0.00475	0.00398
104.4	0.00248	0.00308	0.00478	0.00408
104.64	0.0025	0.00337	0.00472	0.00422
104.88	0.00259	0.00318	0.00491	0.0041
105.12	0.0025	0.00337	0.00477	0.00441
105.36	0.00254	0.00321	0.00469	0.00401
105.6	0.00255	0.00331	0.00479	0.00434
105.84	0.00253	0.00319	0.00489	0.00418
106.08	0.00257	0.00315	0.00465	0.00415
106.32	0.00228	0.00316	0.00471	0.00417
106.56	0.00254	0.00327	0.00487	0.00439
106.8	0.00249	0.00311	0.00484	0.00427
107.04	0.0023	0.00318	0.00497	0.00409
107.28	0.00247	0.00316	0.0047	0.00403
107.52	0.0024	0.00308	0.00484	0.00415
107.76	0.00245	0.00319	0.00466	0.00423
108	0.00229	0.00305	0.00477	0.00416
108.24	0.00259	0.00313	0.00475	0.00415
108.48	0.0025	0.00326	0.00463	0.00433
108.72	0.00254	0.00332	0.0046	0.00406
108.96	0.00252	0.00328	0.00461	0.00411
109.2	0.00244	0.00312	0.0047	0.00423
109.44	0.00247	0.00317	0.00473	0.00425
109.68	0.00238	0.00318	0.00467	0.00417
109.92	0.00242	0.00331	0.0046	0.00405
110.16	0.00254	0.00309	0.00473	0.00416
110.4	0.00249	0.00319	0.00474	0.00411
110.64	0.00246	0.00323	0.00477	0.00422
110.88	0.00239	0.00328	0.0048	0.00423
111.12	0.00238	0.00328	0.00475	0.00411
111.36	0.00248	0.00305	0.0048	0.00426
111.6	0.00249	0.00314	0.00475	0.00433
111.84	0.00247	0.00332	0.00472	0.00418
112.08	0.00262	0.00317	0.00465	0.00434
112.32	0.0024	0.00328	0.00482	0.00427
112.56	0.00238	0.00313	0.00487	0.00439
112.8	0.00253	0.0031	0.00487	0.00405
113.04	0.0025	0.00328	0.00482	0.00412
113.28	0.00257	0.00307	0.0046	0.00436
113.52	0.00241	0.00299	0.00465	0.00421
113.76	0.00247	0.00319	0.00482	0.00421
114	0.00247	0.00329	0.00467	0.00408
114.24	0.00247	0.00333	0.00476	0.00416
114.48	0.00224	0.00319	0.00481	0.00412
114.72	0.00267	0.00314	0.00467	0.0042
114.96	0.00251	0.00328	0.00494	0.00403
115.2	0.00257	0.00322	0.00468	0.00417
115.44	0.00256	0.00306	0.00473	0.00392
115.68	0.00243	0.00315	0.00479	0.00431
115.92	0.00231	0.0031	0.00481	0.00426
116.16	0.00252	0.00312	0.00467	0.00424
116.4	0.00248	0.00317	0.00468	0.00431
116.64	0.00237	0.00328	0.0047	0.00416
116.88	0.00239	0.00327	0.00488	0.00447
117.12	0.00241	0.00328	0.00481	0.00411
117.36	0.00242	0.00321	0.00471	0.00423
117.6	0.00247	0.00309	0.0047	0.0041
117.84	0.00232	0.0032	0.00481	0.00413
118.08	0.00247	0.00303	0.00474	0.00414
118.32	0.00269	0.00318	0.00477	0.00431
118.56	0.00258	0.00306	0.00483	0.00408
118.8	0.00254	0.00324	0.00481	0.00404
119.04	0.0025	0.00302	0.00486	0.0044
119.28	0.00245	0.00331	0.00459	0.00409
119.52	0.00259	0.00321	0.00476	0.00419
119.76	0.00248	0.00336	0.0049	0.0043
120	0.00238	0.00328	0.00462	0.00437
120.24	0.00247	0.00332	0.0047	0.00426
120.48	0.00235	0.00325	0.00481	0.00434
120.72	0.0024	0.00313	0.00485	0.00419
120.96	0.00239	0.00319	0.00475	0.00414
121.2	0.00253	0.00319	0.00454	0.00415
121.44	0.00247	0.00323	0.00482	0.00406
121.68	0.00249	0.00328	0.00486	0.00422
121.92	0.00236	0.00331	0.00477	0.00421
122.16	0.00252	0.00343	0.00486	0.00409
122.4	0.00258	0.00326	0.00468	0.00415
122.64	0.00255	0.0031	0.00468	0.0042
122.88	0.0024	0.00327	0.0048	0.0041
123.12	0.00249	0.0031	0.00475	0.00421
123.36	0.0024	0.00318	0.0048	0.00407
123.6	0.00244	0.0032	0.00472	0.00412
123.84	0.00235	0.00317	0.00467	0.00429
124.08	0.00238	0.00314	0.00477	0.00426
124.32	0.00251	0.00333	0.00481	0.00411
124.56	0.00247	0.00321	0.00464	0.00416
124.8	0.00249	0.00324	0.005	0.00415
125.04	0.00245	0.00326	0.0049	0.00409
125.28	0.00257	0.00305	0.00474	0.00414
125.52	0.00255	0.00326	0.00478	0.00405
125.76	0.00262	0.00322	0.00472	0.00407
126	0.00248	0.00319	0.00477	0.00418
126.24	0.00241	0.00342	0.00481	0.00409
126.48	0.00243	0.00316	0.0048	0.00415
126.72	0.0025	0.00325	0.00471	0.00411
126.96	0.00245	0.00311	0.00491	0.00415
127.2	0.00245	0.00315	0.00487	0.00414
127.44	0.00227	0.00327	0.00482	0.00418
127.68	0.00242	0.00299	0.00467	0.00409
127.92	0.00254	0.0031	0.00485	0.00426
128.16	0.00251	0.00309	0.00485	0.00432
128.4	0.00254	0.00299	0.00488	0.00421
128.64	0.00228	0.00307	0.00487	0.0042
128.88	0.00265	0.00358	0.00493	0.00427
129.12	0.00266	0.00294	0.00494	0.00409
129.36	0.00274	0.00331	0.0048	0.00418
129.6	0.00236	0.00345	0.00483	0.00429
129.84	0.00246	0.00301	0.00486	0.00422
130.08	0.00247	0.00342	0.00481	0.00422
130.32	0.0026	0.00319	0.00483	0.00423
130.56	0.00246	0.00322	0.00479	0.00405
130.8	0.00246	0.00326	0.00492	0.00419
131.04	0.00237	0.00316	0.00467	0.00413
131.28	0.00249	0.00317	0.00485	0.00417
131.52	0.00237	0.00313	0.00479	0.00413
131.76	0.0023	0.00328	0.00476	0.00436
132	0.00251	0.00334	0.00491	0.00423
132.24	0.00264	0.00332	0.00484	0.00416
132.48	0.00239	0.0032	0.00472	0.00407
132.72	0.0024	0.00313	0.0048	0.00421
132.96	0.0026	0.0033	0.00481	0.0039
133.2	0.00243	0.00325	0.00494	0.00406
133.44	0.00249	0.00326	0.00494	0.00421
133.68	0.00237	0.00324	0.00481	0.00411
133.92	0.00263	0.0031	0.00482	0.00428
134.16	0.0025	0.00314	0.00489	0.00403
134.4	0.00244	0.00335	0.00485	0.00426
134.64	0.0026	0.003	0.00486	0.00412
134.88	0.00271	0.00316	0.00478	0.00415
135.12	0.00252	0.00322	0.00491	0.00408
135.36	0.00234	0.00322	0.00482	0.004
135.6	0.00236	0.00304	0.0049	0.00406
135.84	0.00256	0.00315	0.00482	0.00412
136.08	0.0025	0.00304	0.00477	0.00405
136.32	0.00257	0.00311	0.00474	0.00421
136.56	0.00248	0.00324	0.00499	0.00422
136.8	0.00252	0.00331	0.0048	0.00412
137.04	0.00249	0.00329	0.00482	0.00412
137.28	0.00246	0.00324	0.00484	0.00425
137.52	0.00248	0.00319	0.00493	0.00422
137.76	0.00241	0.00331	0.00472	0.00421
138	0.0025	0.0032	0.00489	0.00412
138.24	0.0025	0.00319	0.00469	0.00423
138.48	0.00239	0.0034	0.00474	0.00417
138.72	0.00252	0.00339	0.00485	0.00424
138.96	0.00234	0.00304	0.00496	0.00411
139.2	0.00238	0.00306	0.00473	0.00396
139.44	0.00265	0.00325	0.00491	0.00395
139.68	0.00243	0.00313	0.00459	0.0041
139.92	0.0024	0.00324	0.00489	0.00409
140.16	0.00247	0.00306	0.00491	0.00421
140.4	0.00247	0.00314	0.00479	0.00428
140.64	0.00244	0.00325	0.00481	0.00431
140.88	0.00253	0.00298	0.00479	0.00412
141.12	0.00255	0.00317	0.00472	0.00413
141.36	0.00243	0.00307	0.00483	0.00427
141.6	0.00252	0.00312	0.00466	0.00407
141.84	0.00252	0.00331	0.00484	0.00409
142.08	0.00255	0.00321	0.00471	0.0042
142.32	0.00244	0.00312	0.00477	0.00422
142.56	0.00244	0.00314	0.00478	0.00428
142.8	0.00263	0.00311	0.00476	0.00402
143.04	0.00263	0.00331	0.00493	0.00422
143.28	0.00237	0.00325	0.00483	0.00418
143.52	0.00258	0.00324	0.00479	0.00411
143.76	0.00261	0.00326	0.00476	0.00406
144	0.00253	0.0032	0.00495	0.00423
144.24	0.00253	0.00323	0.00475	0.00408
144.48	0.00238	0.00311	0.00477	0.00416
144.72	0.00247	0.00343	0.00487	0.00408
144.96	0.00253	0.00314	0.00489	0.00403
145.2	0.00235	0.00338	0.00465	0.00433
145.44	0.00245	0.00325	0.00487	0.00422
145.68	0.00242	0.00306	0.00476	0.00423
145.92	0.00246	0.00323	0.00484	0.00413
146.16	0.0027	0.00316	0.00477	0.00415
146.4	0.00255	0.00325	0.00492	0.00417
146.64	0.0026	0.00313	0.0049	0.00446
146.88	0.00222	0.00321	0.005	0.00421
147.12	0.00239	0.00317	0.00487	0.00416
147.36	0.00256	0.00323	0.00482	0.00439
147.6	0.00253	0.00322	0.00484	0.00421
147.84	0.0024	0.00311	0.00486	0.00409
148.08	0.00255	0.00318	0.00481	0.00423
148.32	0.00248	0.00317	0.00466	0.00423
148.56	0.00242	0.00324	0.00485	0.00416
148.8	0.00249	0.00345	0.00481	0.00413
149.04	0.00256	0.00318	0.00468	0.00409
149.28	0.00244	0.00313	0.00484	0.00398
149.52	0.00248	0.00312	0.00465	0.00413
149.76	0.00258	0.00299	0.00463	0.00441
150	0.00262	0.00318	0.00472	0.00434
150.24	0.00271	0.00347	0.00473	0.00423
150.48	0.00275	0.0031	0.00502	0.00437
150.72	-0.00469	-0.005	-0.00344	-0.00415
150.96	-0.03512	-0.03896	-0.03788	-0.03896
151.2	0.01168	0.01715	0.01716	0.01738
151.44	-0.01051	-0.01117	-0.00995	-0.01062
151.68	0.00315	0.00387	0.00541	0.00466
151.92	0.00312	0.00367	0.00535	0.00441
152.16	0.00322	0.00391	0.00526	0.00458
152.4	0.00328	0.00404	0.00533	0.00462
152.64	0.00318	0.00408	0.00527	0.00459
152.88	0.00335	0.00393	0.00539	0.00491
153.12	0.00331	0.00398	0.00539	0.0047
153.36	0.00333	0.00393	0.00535	0.00471
153.6	0.00323	0.00405	0.00551	0.00459
153.84	0.00339	0.00397	0.00556	0.00474
154.08	0.00337	0.00423	0.00553	0.00481
154.32	0.00342	0.00396	0.00564	0.00504
154.56	0.00349	0.00407	0.00556	0.00507
154.8	0.0036	0.00431	0.00559	0.00507
155.04	0.00359	0.00431	0.0056	0.00513
155.28	0.00378	0.00432	0.00583	0.00502
155.52	0.00353	0.00446	0.00577	0.00527
155.76	0.0036	0.00433	0.00568	0.00533
156	0.00376	0.00441	0.0057	0.00518
156.24	0.00359	0.00437	0.00607	0.00499
156.48	0.00375	0.00457	0.00585	0.00518
156.72	0.00376	0.00446	0.00596	0.00527
156.96	0.00418	0.00459	0.006	0.00531
157.2	0.00393	0.00465	0.00592	0.00532
157.44	0.00393	0.00463	0.00607	0.00531
157.68	0.00392	0.00468	0.00591	0.00541
157.92	0.00388	0.00462	0.0061	0.00547
158.16	0.00419	0.00476	0.00597	0.00536
158.4	0.0039	0.00476	0.00615	0.00544
158.64	0.00401	0.00495	0.00619	0.00549
158.88	0.00399	0.00484	0.00609	0.00548
159.12	0.0041	0.00477	0.00607	0.00558
159.36	0.00408	0.00481	0.00627	0.00543
159.6	0.00413	0.00466	0.00598	0.00551
159.84	0.00425	0.00488	0.00613	0.00572
160.08	0.00405	0.00496	0.00623	0.00565
160.32	0.004	0.00477	0.0061	0.00551
160.56	0.00392	0.00477	0.00622	0.00555
160.8	0.00419	0.00512	0.00636	0.00568
161.04	0.00442	0.00501	0.00603	0.00546
161.28	0.00414	0.00502	0.00648	0.00548
161.52	0.00421	0.00504	0.00641	0.00548
161.76	0.00429	0.00507	0.0064	0.00573
162	0.0042	0.00533	0.00631	0.0056
162.24	0.00442	0.0052	0.0064	0.00574
162.48	0.00411	0.00517	0.00628	0.00575
162.72	0.00407	0.00508	0.00625	0.00567
162.96	0.00428	0.00525	0.00663	0.00584
163.2	0.00422	0.00507	0.00656	0.00578
163.44	0.00434	0.00521	0.00648	0.00563
163.68	0.00428	0.00538	0.0065	0.00578
163.92	0.00426	0.00493	0.00642	0.00585
164.16	0.00435	0.00519	0.00645	0.00581
164.4	0.0043	0.00515	0.00641	0.00594
164.64	0.00425	0.00526	0.00647	0.00588
164.88	0.00446	0.00524	0.00661	0.00575
165.12	0.00433	0.00527	0.00646	0.00587
165.36	0.00431	0.0052	0.00637	0.0057
165.6	0.00416	0.00505	0.00628	0.00584
165.84	0.0042	0.00536	0.00661	0.0058
166.08	0.00457	0.00531	0.00664	0.00594
166.32	0.00443	0.00537	0.00657	0.00596
166.56	0.00474	0.00525	0.00651	0.00579
166.8	0.00452	0.00533	0.00643	0.00588
167.04	0.00449	0.00558	0.00651	0.00582
167.28	0.00446	0.00523	0.00673	0.00587
167.52	0.00446	0.00536	0.00663	0.00596
167.76	0.00454	0.00532	0.00679	0.00594
168	0.00429	0.00534	0.00659	0.00601
168.24	0.00422	0.0052	0.00666	0.00601
168.48	0.00453	0.0055	0.00684	0.00601
168.72	0.0044	0.00536	0.00669	0.00584
168.96	0.00445	0.00527	0.00655	0.00584
169.2	0.00451	0.00543	0.00665	0.00594
169.44	0.00449	0.00535	0.00665	0.00597
169.68	0.00444	0.00527	0.0067	0.00608
169.92	0.00447	0.00533	0.00671	0.0059
170.16	0.00441	0.00524	0.00666	0.00619
170.4	0.00465	0.00545	0.00674	0.0058
170.64	0.00461	0.00532	0.00665	0.00585
170.88	0.00453	0.0053	0.00679	0.00609
171.12	0.00449	0.00529	0.00685	0.006
171.36	0.00439	0.00531	0.00691	0.00602
171.6	0.00429	0.00542	0.0066	0.00608
171.84	0.00468	0.00546	0.00686	0.006
172.08	0.00461	0.00532	0.00685	0.00598
172.32	0.00461	0.00527	0.00685	0.00611
172.56	0.00455	0.00555	0.00691	0.00625
172.8	0.00453	0.00525	0.00655	0.00588
173.04	0.0046	0.00517	0.00691	0.00599
173.28	0.0046	0.00554	0.00702	0.00598
173.52	0.00453	0.00533	0.00688	0.00598
173.76	0.00474	0.00544	0.00682	0.00596
174	0.00451	0.0054	0.00695	0.006
174.24	0.0048	0.00544	0.00684	0.00588
174.48	0.00466	0.00563	0.00694	0.00607
174.72	0.00454	0.00527	0.00702	0.00612
174.96	0.00449	0.00552	0.00696	0.00612
175.2	0.00447	0.00535	0.00684	0.00603
175.44	0.00463	0.00543	0.00691	0.00602
175.68	0.00477	0.00565	0.00702	0.00614
175.92	0.00453	0.00551	0.00687	0.00609
176.16	0.00469	0.00537	0.00683	0.00595
176.4	0.0046	0.00548	0.00684	0.00597
176.64	0.00472	0.00536	0.00683	0.00598
176.88	0.00469	0.00549	0.007	0.00611
177.12	0.0046	0.00528	0.00702	0.00602
177.36	0.00466	0.00546	0.00687	0.00623
177.6	0.0046	0.00539	0.00705	0.00596
177.84	0.00463	0.0054	0.00699	0.00614
178.08	0.00469	0.00558	0.00695	0.00604
178.32	0.00449	0.00555	0.00704	0.00604
178.56	0.00467	0.0056	0.0069	0.00615
178.8	0.00463	0.00541	0.00708	0.00608
179.04	0.0046	0.00557	0.00689	0.0062
179.28	0.00472	0.00571	0.00695	0.00606
179.52	0.00465	0.00579	0.0069	0.00619
179.76	0.00481	0.00549	0.0071	0.00635
180	0.00473	0.00544	0.00701	0.00611
180.24	0.00486	0.00551	0.00697	0.0062
180.48	0.0046	0.00545	0.00702	0.00619
180.72	0.00446	0.00555	0.00702	0.00603
180.96	0.0048	0.0055	0.00708	0.0062
181.2	0.00482	0.00553	0.00695	0.00614
181.44	0.00476	0.00573	0.00691	0.00615
181.68	0.00466	0.00557	0.00695	0.0061
181.92	0.00474	0.00546	0.00692	0.00618
182.16	0.00468	0.00547	0.00708	0.00602
182.4	0.0048	0.00533	0.00706	0.00617
182.64	0.00474	0.00576	0.00699	0.00608
182.88	0.00498	0.00557	0.00702	0.00638
183.12	0.00462	0.00542	0.00704	0.00607
183.36	0.00479	0.00558	0.00713	0.0062
183.6	0.00476	0.0056	0.00712	0.00626
183.84	0.0047	0.00546	0.00707	0.00626
184.08	0.00466	0.00546	0.00698	0.00598
184.32	0.0046	0.00562	0.00716	0.00647
184.56	0.00458	0.00558	0.00709	0.00634
184.8	0.00481	0.00565	0.00724	0.00613
185.04	0.00489	0.00567	0.0072	0.00603
185.28	0.00464	0.00571	0.00722	0.00615
185.52	0.0047	0.00562	0.007	0.00614
185.76	0.00485	0.00553	0.00698	0.00609
186	0.00468	0.00548	0.00718	0.00629
186.24	0.00473	0.00566	0.00716	0.00627
186.48	0.00491	0.00552	0.00721	0.00643
186.72	0.00481	0.00564	0.00712	0.00622
186.96	0.00478	0.00568	0.00705	0.00624
187.2	0.00483	0.00548	0.00704	0.00614
187.44	0.00484	0.00548	0.00706	0.00605
187.68	0.00482	0.00553	0.00725	0.00626
187.92	0.00467	0.0054	0.00719	0.00601
188.16	0.00477	0.00564	0.00711	0.00635
188.4	0.00486	0.00557	0.00729	0.00612
188.64	0.00464	0.00554	0.00722	0.00627
188.88	0.00464	0.00568	0.0071	0.00616
189.12	0.00483	0.00551	0.00695	0.00647
189.36	0.0048	0.00554	0.00715	0.00632
189.6	0.00493	0.00554	0.00712	0.00637
189.84	0.00472	0.00557	0.0072	0.00635
190.08	0.0048	0.00544	0.00725	0.00621
190.32	0.00481	0.00567	0.00722	0.00641
190.56	0.00466	0.00581	0.00726	0.00643
190.8	0.00487	0.00552	0.00714	0.00634
191.04	0.00496	0.00561	0.00725	0.00625
191.28	0.00481	0.00564	0.00728	0.00612
191.52	0.00467	0.00558	0.00742	0.00631
191.76	0.00492	0.00542	0.00719	0.00636
192	0.00471	0.00558	0.00717	0.00622
192.24	0.00475	0.00574	0.00733	0.00638
192.48	0.00468	0.00555	0.00726	0.00615
192.72	0.00493	0.00557	0.0072	0.00631
192.96	0.00491	0.00566	0.00729	0.00612
193.2	0.00479	0.00567	0.00729	0.00666
193.44	0.00488	0.00568	0.0072	0.00639
193.68	0.00489	0.00557	0.00722	0.00644
193.92	0.00487	0.00575	0.00712	0.00638
194.16	0.00485	0.00574	0.00723	0.00618
194.4	0.00493	0.00557	0.00723	0.00634
194.64	0.00469	0.00566	0.00724	0.00629
194.88	0.00493	0.00584	0.00706	0.00622
195.12	0.0049	0.00555	0.00709	0.00613
195.36	0.00488	0.00566	0.00723	0.00629
195.6	0.0048	0.00574	0.00725	0.00644
195.84	0.00495	0.00567	0.00727	0.00637
196.08	0.00501	0.00566	0.00711	0.00607
196.32	0.00487	0.00554	0.00739	0.00632
196.56	0.00489	0.0054	0.00726	0.00635
196.8	0.00469	0.00555	0.00708	0.00629
197.04	0.0049	0.00565	0.00711	0.00629
197.28	0.005	0.00572	0.00726	0.00618
197.52	0.00493	0.00561	0.00723	0.00628
197.76	0.00502	0.00581	0.00704	0.00621
198	0.00496	0.00568	0.00755	0.00647
198.24	0.00498	0.00556	0.00728	0.00638
198.48	0.00488	0.00547	0.00712	0.0064
198.72	0.00495	0.0056	0.00709	0.00626
198.96	0.00491	0.00576	0.00729	0.00633
199.2	0.00486	0.00546	0.00737	0.00625
199.44	0.00491	0.00567	0.00732	0.00618
199.68	0.00489	0.00565	0.00727	0.00614
199.92	0.00485	0.00562	0.00718	0.00653
200.16	0.00488	0.00566	0.00736	0.00619
200.4	0.00492	0.00576	0.00732	0.00618
200.64	0.00477	0.0056	0.00716	0.00636
200.88	0.00498	0.0056	0.0073	0.00611
201.12	0.00507	0.00556	0.00734	0.00622
201.36	0.00486	0.00558	0.00722	0.00597
201.6	0.0051	0.00568	0.00727	0.00619
201.84	0.0048	0.00587	0.00725	0.00644
202.08	0.00494	0.00566	0.00723	0.00629
202.32	0.005	0.0057	0.00737	0.0064
202.56	0.00486	0.0057	0.00734	0.00607
202.8	0.00493	0.00544	0.00734	0.00637
203.04	0.00489	0.00565	0.00737	0.00636
203.28	0.00497	0.00558	0.00728	0.0063
203.52	0.00497	0.00572	0.00727	0.00637
203.76	0.00505	0.00578	0.00718	0.00641
204	0.00491	0.00567	0.00744	0.00635
204.24	0.00508	0.00561	0.00739	0.00639
204.48	0.00485	0.00556	0.00733	0.00643
204.72	0.00497	0.00575	0.00731	0.00614
204.96	0.00496	0.00577	0.00748	0.00625
205.2	0.00492	0.00556	0.0072	0.00612
205.44	0.00488	0.00582	0.00731	0.0064
205.68	0.00494	0.00556	0.00724	0.00637
205.92	0.00489	0.00558	0.00721	0.00631
206.16	0.00491	0.00573	0.00742	0.00637
206.4	0.00487	0.00536	0.00714	0.00619
206.64	0.00497	0.00571	0.00736	0.00645
206.88	0.00471	0.00562	0.00725	0.00626
207.12	0.00487	0.00573	0.0075	0.00614
207.36	0.00508	0.00562	0.00724	0.00637
207.6	0.00496	0.00568	0.00744	0.00648
207.84	0.00476	0.00573	0.00737	0.00636
208.08	0.00515	0.00559	0.00731	0.00622
208.32	0.00511	0.00578	0.00732	0.00653
208.56	0.00509	0.00566	0.00746	0.00638
208.8	0.00491	0.00567	0.0073	0.00625
209.04	0.00489	0.00561	0.00732	0.00629
209.28	0.00473	0.00552	0.00739	0.00623
209.52	0.0048	0.00557	0.00729	0.00642
209.76	0.00495	0.00582	0.00729	0.00628
210	0.00496	0.00559	0.00746	0.00626
210.24	0.00506	0.00559	0.00736	0.00641
210.48	0.00491	0.00555	0.00715	0.00639
210.72	0.0049	0.00542	0.00729	0.00637
210.96	0.00498	0.00556	0.00726	0.00646
211.2	0.00494	0.00565	0.00727	0.00628
211.44	0.0048	0.00565	0.00729	0.00609
211.68	0.00508	0.00572	0.00739	0.00627
211.92	0.00498	0.00575	0.00763	0.0064
212.16	0.00498	0.00563	0.00726	0.0065
212.4	0.00482	0.00564	0.00725	0.00646
212.64	0.00498	0.00557	0.00731	0.00637
212.88	0.0052	0.00561	0.00739	0.00646
213.12	0.0049	0.00557	0.00747	0.00639
213.36	0.00505	0.00545	0.00719	0.0064
213.6	0.00505	0.00577	0.00742	0.00655
213.84	0.00497	0.00566	0.00749	0.00644
214.08	0.00514	0.0056	0.00736	0.00652
214.32	0.00504	0.00542	0.00737	0.00631
214.56	0.00482	0.00569	0.00729	0.00638
214.8	0.00511	0.00562	0.00743	0.00616
215.04	0.00506	0.00558	0.00738	0.00648
215.28	0.00505	0.00562	0.00728	0.00622
215.52	0.00509	0.00556	0.00725	0.00627
215.76	0.00496	0.00574	0.00729	0.00635
216	0.00505	0.00552	0.00737	0.00625
216.24	0.00517	0.00549	0.00735	0.00631
216.48	0.00489	0.00556	0.00731	0.00635
216.72	0.00467	0.00567	0.00716	0.00619
216.96	0.00505	0.00566	0.0075	0.00642
217.2	0.00506	0.0056	0.00739	0.00617
217.44	0.00512	0.00563	0.0073	0.00623
217.68	0.00508	0.00566	0.00731	0.00631
217.92	0.00493	0.00555	0.00725	0.00625
218.16	0.00489	0.00551	0.0074	0.00622
218.4	0.00493	0.0056	0.0075	0.00637
218.64	0.00502	0.00566	0.00732	0.00643
218.88	0.00494	0.0054	0.00737	0.00629
219.12	0.00486	0.00566	0.00732	0.00644
219.36	0.00502	0.00547	0.00715	0.00613
219.6	0.00494	0.00569	0.00746	0.00634
219.84	0.00506	0.00553	0.00742	0.0062
220.08	0.00505	0.00576	0.00729	0.00629
220.32	0.00501	0.00562	0.0073	0.00637
220.56	0.00511	0.0056	0.00739	0.00654
220.8	0.00505	0.0056	0.00738	0.00655
221.04	0.00486	0.00541	0.00714	0.00632
221.28	0.00494	0.00565	0.00728	0.00636
221.52	0.00502	0.00577	0.0074	0.00634
221.76	0.00513	0.00546	0.00731	0.00636
222	0.00501	0.00554	0.0073	0.00631
222.24	0.00501	0.00563	0.00726	0.00619
222.48	0.00485	0.0056	0.00723	0.00628
222.72	0.00502	0.00553	0.00715	0.00634
222.96	0.00508	0.00565	0.00746	0.00623
223.2	0.00503	0.00554	0.0072	0.00644
223.44	0.00495	0.00558	0.00738	0.00637
223.68	0.00499	0.00548	0.00747	0.0063
223.92	0.00495	0.00559	0.00726	0.00605
224.16	0.00487	0.00565	0.00737	0.00634
224.4	0.00498	0.00555	0.00725	0.00652
224.64	0.00509	0.00563	0.00741	0.00624
224.88	0.00497	0.0057	0.0072	0.00642
225.12	0.00481	0.00548	0.00749	0.00632
225.36	0.00512	0.00542	0.00747	0.00639
225.6	0.00505	0.0055	0.00733	0.0063
225.84	0.00493	0.00545	0.00743	0.00627
226.08	0.00509	0.00551	0.00734	0.00643
226.32	0.00502	0.00559	0.00723	0.00628
226.56	0.00498	0.00567	0.00743	0.00627
226.8	0.00503	0.00555	0.00755	0.0062
227.04	0.00498	0.00564	0.00741	0.00619
227.28	0.0047	0.00552	0.00731	0.00631
227.52	0.00497	0.00552	0.00735	0.0063
227.76	0.00492	0.00553	0.00732	0.00617
228	0.00492	0.00551	0.00744	0.00634
228.24	0.0048	0.00566	0.00743	0.00621
228.48	0.00502	0.00566	0.00724	0.00625
228.72	0.00496	0.00568	0.00724	0.00641
228.96	0.00484	0.00544	0.00733	0.00614
229.2	0.00496	0.00559	0.0074	0.00605
229.44	0.00493	0.00561	0.0073	0.00621
229.68	0.00502	0.00553	0.00745	0.00634
229.92	0.00495	0.00556	0.00718	0.00628
230.16	0.00505	0.0055	0.00728	0.00633
230.4	0.00519	0.00563	0.00717	0.00638
230.64	0.0049	0.00563	0.00732	0.00625
230.88	0.00512	0.00558	0.00728	0.00644
231.12	0.00506	0.00553	0.00728	0.00637
231.36	0.00497	0.00551	0.00738	0.00641
231.6	0.00497	0.00579	0.0072	0.00644
231.84	0.00509	0.0055	0.00725	0.00636
232.08	0.00498	0.00551	0.00732	0.00632
232.32	0.00511	0.00544	0.00738	0.00637
232.56	0.00511	0.00539	0.00743	0.00649
232.8	0.00492	0.00551	0.00724	0.00635
233.04	0.00486	0.00535	0.00738	0.00618
233.28	0.00494	0.00545	0.00711	0.00623
233.52	0.00504	0.00555	0.00719	0.00639
233.76	0.00484	0.00561	0.00736	0.00624
234	0.00511	0.00549	0.00761	0.00625
234.24	0.00476	0.00558	0.00729	0.00621
234.48	0.00496	0.00551	0.0072	0.00618
234.72	0.00511	0.00555	0.00748	0.00614
234.96	0.0051	0.00543	0.0073	0.00632
235.2	0.00502	0.00543	0.00727	0.00625
235.44	0.00505	0.00552	0.00735	0.00602
235.68	0.00478	0.00564	0.00708	0.00629
235.92	0.00475	0.00568	0.00748	0.00647
236.16	0.005	0.00563	0.00724	0.00624
236.4	0.00496	0.00577	0.00732	0.00614
236.64	0.00501	0.00568	0.0074	0.00625
236.88	0.00515	0.00547	0.00729	0.00635
237.12	0.00491	0.00559	0.00717	0.00621
237.36	0.00513	0.00535	0.0074	0.00632
237.6	0.00499	0.00554	0.00734	0.00628
237.84	0.00493	0.00543	0.00723	0.00624
238.08	0.005	0.00581	0.00722	0.00653
238.32	0.00504	0.00548	0.00729	0.00615
238.56	0.00508	0.00552	0.0074	0.00625
238.8	0.00506	0.00546	0.0074	0.00628
239.04	0.0049	0.00553	0.00735	0.00629
239.28	0.00529	0.00539	0.0073	0.00631
239.52	0.0049	0.00564	0.00714	0.00635
239.76	0.00499	0.00549	0.00734	0.00645
